# Supplementary material for: Metformin alters skeletal muscle transcriptome adaptations to resistance training in older adults
Source: publisher site journal article supplement (doi:10.18632/aging.104096), 2020-10-18
Supplement: Supplementary file [file aging-v12i20-104096-supplementary-material-SD3.pdf]

## SUPPLEMENTARY TABLES

**Supplementary Table 3. List of aging-associated pathways identified to be overrepresented in the Differentially Expressed Genes unique to 16 weeks of metPRT (and not plaPRT) vs baseline.**

| Pathways                                                      | p-value    | q-value    | Source   | Overlap with Differentially Expressed Genes                                                                                                                                                                                                                                                                                                                                               |
|---------------------------------------------------------------|------------|------------|----------|-------------------------------------------------------------------------------------------------------------------------------------------------------------------------------------------------------------------------------------------------------------------------------------------------------------------------------------------------------------------------------------------|
| Cellular senescence                                           | 1.48E-05   | 0.0009203  | KEGG     | MAPK14; NFATC3; E2F1; RHEB; GADD45A; LIN37; CCNE1; SERPINE1; RRAS; TGFB3; PIK3R3; VDAC1; ITPR1; RAF1; MAPKAPK2                                                                                                                                                                                                                                                                            |
| Platelet activation, signaling and aggregation                | 0.00012627 | 0.00391438 | Reactome | MAPK14; TGFB3; ITPR1; RAC1; GNB4; MAGED2; VAV2; SERPINE1; HAMP4; FERMT3; GNA14; PIK3R3; LAMP2; VTI1B; ITIH3; TOR4A; RAF1; ITIH4                                                                                                                                                                                                                                                           |
| Autophagy                                                     | 0.00043644 | 0.00901974 | KEGG     | RAB7A; RHEB; SUPT20H; ATG16L1; RRAS; BAD; PIK3R3; LAMP2; ATG9A; ITPR1; RAF1                                                                                                                                                                                                                                                                                                               |
| Platelet degranulation                                        | 0.00173465 | 0.01596422 | Reactome | TGFB3; MAGED2; ITIH4; HAMP4; FERMT3; LAMP2; VTI1B; ITIH3; TOR4A; SERPINE1                                                                                                                                                                                                                                                                                                                 |
| Response to elevated platelet cytosolic Ca <sup>2+</sup>      | 0.00230046 | 0.01782854 | Reactome | TGFB3; MAGED2; ITIH4; HAMP4; FERMT3; LAMP2; VTI1B; ITIH3; TOR4A; SERPINE1                                                                                                                                                                                                                                                                                                                 |
| Antigen processing: Ubiquitination and Proteasome degradation | 0.00316855 | 0.01965693 | Reactome | KBTBD7; ASB11; UBE2K; ZNRF1; ASB4; LONRF1; ASB5; TRIM32; RNF41; FBXO31; CUL5; UBE2S; RLM; UBE2R2; FBXL22                                                                                                                                                                                                                                                                                  |
| Post-translational protein modification                       | 0.0041917  | 0.02088671 | Reactome | ASB11; RAD23B; EEF1A1; CD59; SPON1; PSMD2; RIPK1; ADAMTS13; HIST2H2BE; FOXO4; VDAC1; DCTN1; SAR1B; CCDC8; KBTBD7; RAB34; TTL3; ASB4; ASB5; XRCC4; PSMA2; GMDS; COPS3; C3; CUL5; TOMM70; NUS1; RAB7A; ST3GAL5; NUP98; UBE2R2; SPARCL1; USP30; F10; ST6GALNAC4; INO80B; EEF1AKMT2; TRAPPC9; UBE2K; WDTC1; ST8SIA2; ARCN1; TRAPPC6A; ADRB2; FBXO31; RNF128; NEU4; RFT1; UBE2S; FEM1A; FBXL22 |
| Neddylation                                                   | 0.00721409 | 0.02981822 | Reactome | KBTBD7; ASB11; WDTC1; ASB4; ASB5; COPS3; PSMD2; PSMA2; FBXO31; CUL5; CCDC8; FBXL22; FEM1A                                                                                                                                                                                                                                                                                                 |

**Supplementary Table 4. Age and sex of young individuals used in this study.**

| Study ID | Age  | Sex    |
|----------|------|--------|
| CMB-001  | 23.0 | Female |
| CMB-018  | 27.2 | Female |
| CMB-020  | 21.6 | Male   |
| CMB-024  | 28.3 | Female |
| CMB-056  | 29.7 | Male   |
| CMB-065  | 24.0 | Male   |
| CMB-071  | 25.3 | Female |
| CMB-073  | 20.7 | Female |
| CMB-079  | 26.0 | Male   |
| CMB-082  | 24.8 | Female |
| CMB-083  | 23.5 | Male   |
| CMB-087  | 21.4 | Female |
| CMB-090  | 22.5 | Female |
| CMB-091  | 23.5 | Male   |
| CMB-099  | 24.3 | Female |
| CMB-101  | 25.8 | Male   |
| CMB-106  | 24.3 | Male   |
| CMB-107  | 19.8 | Female |
| CMB-112  | 21.3 | Female |
| CMB-116  | 23.9 | Male   |
| CMB-123  | 27.2 | Male   |
