# Supplementary material for: Metformin alters skeletal muscle transcriptome adaptations to resistance training in older adults
Source: Aging (Albany NY). 2020 Oct 18;12(20):19852–66. doi: 10.18632/aging.104096 (PMC7655218; doi:10.18632/aging.104096)
Supplement: Supplementary Table 1 [file aging-12-104096-s001..xlsx]

## Sheet: plaPRT (16-weeks vs Baseline)
Supplemental Table 1. Differentially Expressed Genes (DEG) between 16 weeks of intervention and baseline
DEG in plaPRT
ENSEMBL ID	HUGO Gene Symbol	logFC	AveExpr	t	P.Value	adj.P.Val	group
ENSG00000075618.17_FSCN1	FSCN1	1.10278	2.38855	10.62	1.34e-20	2.11e-16	Significantly upregulated (Adj-P<0.01)
ENSG00000130508.10_PXDN	PXDN	0.869246	3.59397	9.12717	1.81e-16	1.42e-12	Significantly upregulated (Adj-P<0.01)
ENSG00000187498.15_COL4A1	COL4A1	1.0436	5.80191	8.63203	3.84e-15	2.01e-11	Significantly upregulated (Adj-P<0.01)
ENSG00000134871.18_COL4A2	COL4A2	0.950835	5.8189	8.56321	5.84e-15	2.29e-11	Significantly upregulated (Adj-P<0.01)
ENSG00000136160.15_EDNRB	EDNRB	0.837466	1.78735	8.51142	8.01e-15	2.43e-11	Significantly upregulated (Adj-P<0.01)
ENSG00000162745.10_OLFML2B	OLFML2B	0.893644	2.44251	8.48723	9.27e-15	2.43e-11	Significantly upregulated (Adj-P<0.01)
ENSG00000187742.14_SECISBP2	SECISBP2	-0.295607	5.07859	-8.23633	4.22e-14	8.55e-11	Significantly downregulated (Adj-P<0.01)
ENSG00000113140.10_SPARC	SPARC	0.791526	7.17538	8.23079	4.36e-14	8.55e-11	Significantly upregulated (Adj-P<0.01)
ENSG00000134013.15_LOXL2	LOXL2	0.956766	1.45698	8.01321	1.6e-13	2.28e-10	Significantly upregulated (Adj-P<0.01)
ENSG00000142188.16_TMEM50B	TMEM50B	-0.289424	4.77191	-8.0208	1.53e-13	2.28e-10	Significantly downregulated (Adj-P<0.01)
ENSG00000173894.10_CBX2	CBX2	0.966367	-0.455654	8.05908	1.22e-13	2.12e-10	Significantly upregulated (Adj-P<0.01)
ENSG00000087303.17_NID2	NID2	0.803876	2.27111	7.84426	4.33e-13	5.22e-10	Significantly upregulated (Adj-P<0.01)
ENSG00000102978.12_POLR2C	POLR2C	-0.224325	5.3493	-7.79921	5.63e-13	6.32e-10	Significantly downregulated (Adj-P<0.01)
ENSG00000204291.10_COL15A1	COL15A1	0.687837	5.91681	7.77469	6.5e-13	6.81e-10	Significantly upregulated (Adj-P<0.01)
ENSG00000248713.1_C4orf54	C4orf54	0.707029	7.39914	7.74724	7.64e-13	7.05e-10	Significantly upregulated (Adj-P<0.01)
ENSG00000168542.14_COL3A1	COL3A1	1.36232	6.08083	7.70467	9.79e-13	8.54e-10	Significantly upregulated (Adj-P<0.01)
ENSG00000176641.10_RNF152	RNF152	0.766751	1.23783	7.67792	1.14e-12	9.45e-10	Significantly upregulated (Adj-P<0.01)
ENSG00000167210.17_LOXHD1	LOXHD1	1.54851	-1.65039	7.86043	3.93e-13	5.15e-10	Significantly upregulated (Adj-P<0.01)
ENSG00000123562.16_MORF4L2	MORF4L2	-0.22989	6.4783	-7.63529	1.47e-12	1.15e-09	Significantly downregulated (Adj-P<0.01)
ENSG00000088882.7_CPXM1	CPXM1	2.35353	-2.21906	7.7564	7.24e-13	7.05e-10	Significantly upregulated (Adj-P<0.01)
ENSG00000136378.14_ADAMTS7	ADAMTS7	0.766134	1.11581	7.45412	4.17e-12	2.97e-09	Significantly upregulated (Adj-P<0.01)
ENSG00000185787.14_MORF4L1	MORF4L1	-0.173996	7.69282	-7.45909	4.05e-12	2.97e-09	Significantly downregulated (Adj-P<0.01)
ENSG00000110697.12_PITPNM1	PITPNM1	0.826526	2.4528	7.44314	4.44e-12	3.03e-09	Significantly upregulated (Adj-P<0.01)
ENSG00000248019.2_FAM13A-AS1	FAM13A-AS1	-0.523678	2.25221	-7.40101	5.65e-12	3.57e-09	Significantly downregulated (Adj-P<0.01)
ENSG00000166106.3_ADAMTS15	ADAMTS15	0.714311	1.36224	7.39974	5.69e-12	3.57e-09	Significantly upregulated (Adj-P<0.01)
ENSG00000154096.13_THY1	THY1	1.42615	1.08523	7.37668	6.49e-12	3.78e-09	Significantly upregulated (Adj-P<0.01)
ENSG00000066735.14_KIF26A	KIF26A	0.636918	2.47931	7.37675	6.49e-12	3.78e-09	Significantly upregulated (Adj-P<0.01)
ENSG00000183580.9_FBXL7	FBXL7	0.586163	1.31302	7.33052	8.45e-12	4.74e-09	Significantly upregulated (Adj-P<0.01)
ENSG00000204262.12_COL5A2	COL5A2	0.715007	3.82973	7.27457	1.16e-11	6.08e-09	Significantly upregulated (Adj-P<0.01)
ENSG00000115875.18_SRSF7	SRSF7	-0.255284	4.88905	-7.27505	1.16e-11	6.08e-09	Significantly downregulated (Adj-P<0.01)
ENSG00000128641.18_MYO1B	MYO1B	0.554235	3.44071	7.25368	1.31e-11	6.62e-09	Significantly upregulated (Adj-P<0.01)
ENSG00000179044.15_EXOC3L1	EXOC3L1	0.832039	0.323284	7.14843	2.37e-11	1.16e-08	Significantly upregulated (Adj-P<0.01)
ENSG00000101825.7_MXRA5	MXRA5	1.51629	1.86725	7.13375	2.57e-11	1.19e-08	Significantly upregulated (Adj-P<0.01)
ENSG00000171208.9_NETO2	NETO2	0.731818	1.06956	7.13361	2.57e-11	1.19e-08	Significantly upregulated (Adj-P<0.01)
ENSG00000196411.9_EPHB4	EPHB4	0.525843	2.89421	7.07935	3.49e-11	1.5e-08	Significantly upregulated (Adj-P<0.01)
ENSG00000132475.10_H3F3B	H3F3B	-0.368342	7.08828	-7.07685	3.53e-11	1.5e-08	Significantly downregulated (Adj-P<0.01)
ENSG00000165548.10_TMEM63C	TMEM63C	1.52887	-0.494315	7.09301	3.23e-11	1.45e-08	Significantly upregulated (Adj-P<0.01)
ENSG00000214357.8_NEURL1B	NEURL1B	0.522967	4.2901	7.04184	4.3e-11	1.78e-08	Significantly upregulated (Adj-P<0.01)
ENSG00000089101.17_CFAP61	CFAP61	-1.02229	3.5151	-7.0135	5.03e-11	2.03e-08	Significantly downregulated (Adj-P<0.01)
ENSG00000279117.1_AP001972.5	AP001972.5	0.630392	0.534139	6.94863	7.22e-11	2.76e-08	Significantly upregulated (Adj-P<0.01)
ENSG00000121390.18_PSPC1	PSPC1	-0.234294	4.12942	-6.94131	7.51e-11	2.81e-08	Significantly downregulated (Adj-P<0.01)
ENSG00000157227.12_MMP14	MMP14	0.696207	2.89884	6.88083	1.05e-10	3.74e-08	Significantly upregulated (Adj-P<0.01)
ENSG00000112081.16_SRSF3	SRSF3	-0.241432	5.73565	-6.88658	1.02e-10	3.71e-08	Significantly downregulated (Adj-P<0.01)
ENSG00000177889.9_UBE2N	UBE2N	-0.191312	5.42267	-6.85208	1.23e-10	4.29e-08	Significantly downregulated (Adj-P<0.01)
ENSG00000186827.10_TNFRSF4	TNFRSF4	0.934782	-0.332292	6.84111	1.31e-10	4.46e-08	Significantly upregulated (Adj-P<0.01)
ENSG00000177971.8_IMP3	IMP3	-0.272133	4.55781	-6.81927	1.47e-10	4.92e-08	Significantly downregulated (Adj-P<0.01)
ENSG00000148773.13_MKI67	MKI67	1.81051	-2.37573	6.96408	6.62e-11	2.6e-08	Significantly upregulated (Adj-P<0.01)
ENSG00000116962.14_NID1	NID1	0.620199	3.97457	6.75745	2.06e-10	6.75e-08	Significantly upregulated (Adj-P<0.01)
ENSG00000130635.15_COL5A1	COL5A1	0.711899	4.23681	6.7239	2.48e-10	7.94e-08	Significantly upregulated (Adj-P<0.01)
ENSG00000152661.8_GJA1	GJA1	0.629279	2.74554	6.65147	3.67e-10	1.11e-07	Significantly upregulated (Adj-P<0.01)
ENSG00000161547.16_SRSF2	SRSF2	-0.214988	6.45864	-6.66855	3.35e-10	1.03e-07	Significantly downregulated (Adj-P<0.01)
ENSG00000089472.16_HEPH	HEPH	0.819458	-0.472681	6.67464	3.24e-10	1.02e-07	Significantly upregulated (Adj-P<0.01)
ENSG00000183798.4_EMILIN3	EMILIN3	0.975447	-0.0154678	6.63054	4.11e-10	1.22e-07	Significantly upregulated (Adj-P<0.01)
ENSG00000138080.13_EMILIN1	EMILIN1	0.547891	3.06683	6.6175	4.41e-10	1.26e-07	Significantly upregulated (Adj-P<0.01)
ENSG00000108821.13_COL1A1	COL1A1	1.32445	4.67081	6.62583	4.22e-10	1.23e-07	Significantly upregulated (Adj-P<0.01)
ENSG00000125089.16_SH3TC1	SH3TC1	0.660999	1.37466	6.58917	5.14e-10	1.38e-07	Significantly upregulated (Adj-P<0.01)
ENSG00000167123.18_CERCAM	CERCAM	0.688984	2.5296	6.59849	4.89e-10	1.35e-07	Significantly upregulated (Adj-P<0.01)
ENSG00000091136.13_LAMB1	LAMB1	0.660895	4.63019	6.61418	4.49e-10	1.26e-07	Significantly upregulated (Adj-P<0.01)
ENSG00000157368.10_IL34	IL34	0.682935	0.273454	6.58473	5.26e-10	1.38e-07	Significantly upregulated (Adj-P<0.01)
ENSG00000011347.9_SYT7	SYT7	0.446244	1.38471	6.56489	5.85e-10	1.48e-07	Significantly upregulated (Adj-P<0.01)
ENSG00000104967.6_NOVA2	NOVA2	0.489691	1.58818	6.55857	6.06e-10	1.51e-07	Significantly upregulated (Adj-P<0.01)
ENSG00000171159.4_C9orf16	C9orf16	0.514498	2.73972	6.57011	5.69e-10	1.46e-07	Significantly upregulated (Adj-P<0.01)
ENSG00000164932.12_CTHRC1	CTHRC1	0.855389	0.148384	6.55546	6.16e-10	1.51e-07	Significantly upregulated (Adj-P<0.01)
ENSG00000179403.11_VWA1	VWA1	0.567509	2.67172	6.54251	6.6e-10	1.59e-07	Significantly upregulated (Adj-P<0.01)
ENSG00000169105.7_CHST14	CHST14	0.364922	1.46181	6.51056	7.83e-10	1.81e-07	Significantly upregulated (Adj-P<0.01)
ENSG00000105472.12_CLEC11A	CLEC11A	0.746925	0.132992	6.51462	7.66e-10	1.81e-07	Significantly upregulated (Adj-P<0.01)
ENSG00000182240.15_BACE2	BACE2	0.437657	2.12766	6.51341	7.71e-10	1.81e-07	Significantly upregulated (Adj-P<0.01)
ENSG00000019549.11_SNAI2	SNAI2	0.562	0.654497	6.4865	8.91e-10	2e-07	Significantly upregulated (Adj-P<0.01)
ENSG00000107821.14_KAZALD1	KAZALD1	0.778949	1.84832	6.48175	9.13e-10	2.02e-07	Significantly upregulated (Adj-P<0.01)
ENSG00000114115.9_RBP1	RBP1	0.617667	0.855575	6.47049	9.7e-10	2.11e-07	Significantly upregulated (Adj-P<0.01)
ENSG00000258584.2_FAM181A-AS1	FAM181A-AS1	0.840898	-0.0208616	6.46765	9.85e-10	2.12e-07	Significantly upregulated (Adj-P<0.01)
ENSG00000131747.14_TOP2A	TOP2A	1.59035	-2.17028	6.58489	5.26e-10	1.38e-07	Significantly upregulated (Adj-P<0.01)
ENSG00000055044.10_NOP58	NOP58	-0.198237	4.38712	-6.45548	1.05e-09	2.23e-07	Significantly downregulated (Adj-P<0.01)
ENSG00000171680.21_PLEKHG5	PLEKHG5	0.558342	2.80698	6.43957	1.14e-09	2.39e-07	Significantly upregulated (Adj-P<0.01)
ENSG00000118292.8_C1orf54	C1orf54	0.629696	0.497781	6.41528	1.3e-09	2.67e-07	Significantly upregulated (Adj-P<0.01)
ENSG00000182492.15_BGN	BGN	0.991884	2.72664	6.41411	1.31e-09	2.67e-07	Significantly upregulated (Adj-P<0.01)
ENSG00000187634.11_SAMD11	SAMD11	1.38276	-1.83427	6.49001	8.74e-10	1.99e-07	Significantly upregulated (Adj-P<0.01)
ENSG00000145911.5_N4BP3	N4BP3	0.352242	2.948	6.39649	1.44e-09	2.89e-07	Significantly upregulated (Adj-P<0.01)
ENSG00000113558.18_SKP1	SKP1	-0.206993	7.54338	-6.38666	1.51e-09	2.97e-07	Significantly downregulated (Adj-P<0.01)
ENSG00000145014.17_TMEM44	TMEM44	0.423445	1.16843	6.35314	1.81e-09	3.5e-07	Significantly upregulated (Adj-P<0.01)
ENSG00000118946.11_PCDH17	PCDH17	0.915743	-0.348868	6.38718	1.51e-09	2.97e-07	Significantly upregulated (Adj-P<0.01)
ENSG00000159228.12_CBR1	CBR1	0.489579	3.4442	6.34405	1.9e-09	3.53e-07	Significantly upregulated (Adj-P<0.01)
ENSG00000170004.16_CHD3	CHD3	0.46868	3.69653	6.34606	1.88e-09	3.53e-07	Significantly upregulated (Adj-P<0.01)
ENSG00000071246.10_VASH1	VASH1	0.513355	3.52744	6.34235	1.91e-09	3.53e-07	Significantly upregulated (Adj-P<0.01)
ENSG00000070808.15_CAMK2A	CAMK2A	-0.334033	7.2806	-6.34389	1.9e-09	3.53e-07	Significantly downregulated (Adj-P<0.01)
ENSG00000116560.10_SFPQ	SFPQ	-0.238064	6.49121	-6.33208	2.02e-09	3.68e-07	Significantly downregulated (Adj-P<0.01)
ENSG00000268996.3_MAN1B1-DT	MAN1B1-DT	0.622704	0.44608	6.29239	2.49e-09	4.43e-07	Significantly upregulated (Adj-P<0.01)
ENSG00000142798.19_HSPG2	HSPG2	0.513133	7.43197	6.3125	2.24e-09	4.04e-07	Significantly upregulated (Adj-P<0.01)
ENSG00000136295.14_TTYH3	TTYH3	0.511147	1.86437	6.28376	2.6e-09	4.44e-07	Significantly upregulated (Adj-P<0.01)
ENSG00000113555.5_PCDH12	PCDH12	0.555053	2.22782	6.26855	2.82e-09	4.75e-07	Significantly upregulated (Adj-P<0.01)
ENSG00000077274.8_CAPN6	CAPN6	0.924803	1.67432	6.26346	2.89e-09	4.83e-07	Significantly upregulated (Adj-P<0.01)
ENSG00000149639.14_SOGA1	SOGA1	0.440973	3.44306	6.28524	2.58e-09	4.44e-07	Significantly upregulated (Adj-P<0.01)
ENSG00000166341.7_DCHS1	DCHS1	0.506031	3.70312	6.29032	2.51e-09	4.43e-07	Significantly upregulated (Adj-P<0.01)
ENSG00000157119.11_KLHL40	KLHL40	-0.562087	7.57012	-6.28748	2.55e-09	4.44e-07	Significantly downregulated (Adj-P<0.01)
ENSG00000101445.9_PPP1R16B	PPP1R16B	0.608801	2.27136	6.26039	2.94e-09	4.84e-07	Significantly upregulated (Adj-P<0.01)
ENSG00000164398.12_ACSL6	ACSL6	-0.597785	2.99251	-6.2592	2.96e-09	4.84e-07	Significantly downregulated (Adj-P<0.01)
ENSG00000176658.16_MYO1D	MYO1D	0.528515	1.55809	6.24043	3.26e-09	5.12e-07	Significantly upregulated (Adj-P<0.01)
ENSG00000106853.19_PTGR1	PTGR1	0.405976	2.58161	6.24773	3.14e-09	4.98e-07	Significantly upregulated (Adj-P<0.01)
ENSG00000170515.13_PA2G4	PA2G4	-0.201609	5.91762	-6.25718	2.99e-09	4.84e-07	Significantly downregulated (Adj-P<0.01)
ENSG00000090924.14_PLEKHG2	PLEKHG2	0.482586	2.4687	6.22569	3.52e-09	5.47e-07	Significantly upregulated (Adj-P<0.01)
ENSG00000113296.14_THBS4	THBS4	0.88375	5.62697	6.25107	3.09e-09	4.94e-07	Significantly upregulated (Adj-P<0.01)
ENSG00000177732.8_SOX12	SOX12	0.740857	1.04478	6.18459	4.36e-09	6.54e-07	Significantly upregulated (Adj-P<0.01)
ENSG00000229659.1_RPL26P6	RPL26P6	0.603725	1.52723	6.18214	4.42e-09	6.54e-07	Significantly upregulated (Adj-P<0.01)
ENSG00000206384.10_COL6A6	COL6A6	1.17712	-0.564654	6.19461	4.14e-09	6.31e-07	Significantly upregulated (Adj-P<0.01)
ENSG00000162367.11_TAL1	TAL1	0.558647	1.08215	6.16827	4.75e-09	6.84e-07	Significantly upregulated (Adj-P<0.01)
ENSG00000147224.11_PRPS1	PRPS1	-0.180723	4.73464	-6.19552	4.12e-09	6.31e-07	Significantly downregulated (Adj-P<0.01)
ENSG00000015133.18_CCDC88C	CCDC88C	0.550695	1.5742	6.15543	5.07e-09	7.11e-07	Significantly upregulated (Adj-P<0.01)
ENSG00000164692.17_COL1A2	COL1A2	0.900675	6.09226	6.18392	4.38e-09	6.54e-07	Significantly upregulated (Adj-P<0.01)
ENSG00000112655.15_PTK7	PTK7	0.884074	-0.869216	6.16614	4.8e-09	6.85e-07	Significantly upregulated (Adj-P<0.01)
ENSG00000161057.11_PSMC2	PSMC2	-0.15196	6.30686	-6.17123	4.67e-09	6.81e-07	Significantly downregulated (Adj-P<0.01)
ENSG00000116209.11_TMEM59	TMEM59	-0.157936	6.3142	-6.17081	4.69e-09	6.81e-07	Significantly downregulated (Adj-P<0.01)
ENSG00000115738.9_ID2	ID2	0.660043	1.50079	6.12922	5.81e-09	7.93e-07	Significantly upregulated (Adj-P<0.01)
ENSG00000198832.10_SELENOM	SELENOM	-0.574212	3.0808	-6.14985	5.22e-09	7.19e-07	Significantly downregulated (Adj-P<0.01)
ENSG00000110042.7_DTX4	DTX4	0.517551	1.41877	6.1197	6.1e-09	8.19e-07	Significantly upregulated (Adj-P<0.01)
ENSG00000165757.8_JCAD	JCAD	0.494235	4.34854	6.15622	5.05e-09	7.11e-07	Significantly upregulated (Adj-P<0.01)
ENSG00000205531.12_NAP1L4	NAP1L4	-0.155391	6.77377	-6.15177	5.17e-09	7.18e-07	Significantly downregulated (Adj-P<0.01)
ENSG00000179627.9_ZBTB42	ZBTB42	0.378592	2.25333	6.11729	6.18e-09	8.22e-07	Significantly upregulated (Adj-P<0.01)
ENSG00000224383.7_PRR29	PRR29	0.616319	-0.497097	6.12497	5.94e-09	8.04e-07	Significantly upregulated (Adj-P<0.01)
ENSG00000026652.13_AGPAT4	AGPAT4	0.542299	0.635783	6.10056	6.73e-09	8.66e-07	Significantly upregulated (Adj-P<0.01)
ENSG00000181104.6_F2R	F2R	0.666471	1.65993	6.09804	6.82e-09	8.71e-07	Significantly upregulated (Adj-P<0.01)
ENSG00000104723.20_TUSC3	TUSC3	0.513312	1.25759	6.0854	7.28e-09	9.14e-07	Significantly upregulated (Adj-P<0.01)
ENSG00000188157.14_AGRN	AGRN	0.568688	3.51625	6.10468	6.59e-09	8.62e-07	Significantly upregulated (Adj-P<0.01)
ENSG00000183853.17_KIRREL1	KIRREL1	0.496456	2.56984	6.08613	7.25e-09	9.14e-07	Significantly upregulated (Adj-P<0.01)
ENSG00000106484.15_MEST	MEST	0.879911	1.56904	6.07141	7.82e-09	9.67e-07	Significantly upregulated (Adj-P<0.01)
ENSG00000089737.16_DDX24	DDX24	-0.191283	6.09245	-6.10799	6.48e-09	8.55e-07	Significantly downregulated (Adj-P<0.01)
ENSG00000143761.15_ARF1	ARF1	-0.139247	6.95303	-6.10071	6.73e-09	8.66e-07	Significantly downregulated (Adj-P<0.01)
ENSG00000182871.14_COL18A1	COL18A1	0.573771	4.60028	6.07922	7.52e-09	9.36e-07	Significantly upregulated (Adj-P<0.01)
ENSG00000013810.18_TACC3	TACC3	0.514856	1.16128	6.03409	9.47e-09	1.11e-06	Significantly upregulated (Adj-P<0.01)
ENSG00000132467.3_UTP3	UTP3	-0.195099	3.11542	-6.0575	8.4e-09	1.03e-06	Significantly downregulated (Adj-P<0.01)
ENSG00000231721.7_LINC-PINT	LINC-PINT	-0.381149	2.92418	-6.04246	9.07e-09	1.09e-06	Significantly downregulated (Adj-P<0.01)
ENSG00000127920.5_GNG11	GNG11	0.409811	3.8959	6.05456	8.53e-09	1.04e-06	Significantly upregulated (Adj-P<0.01)
ENSG00000161940.10_BCL6B	BCL6B	0.548399	2.23574	6.01619	1.04e-08	1.19e-06	Significantly upregulated (Adj-P<0.01)
ENSG00000165197.4_VEGFD	VEGFD	-0.438187	2.54184	-6.01515	1.04e-08	1.19e-06	Significantly downregulated (Adj-P<0.01)
ENSG00000170144.20_HNRNPA3	HNRNPA3	-0.172811	6.84287	-6.04351	9.02e-09	1.09e-06	Significantly downregulated (Adj-P<0.01)
ENSG00000178913.7_TAF7	TAF7	-0.182117	6.58337	-6.03723	9.32e-09	1.11e-06	Significantly downregulated (Adj-P<0.01)
ENSG00000132471.11_WBP2	WBP2	-0.264506	6.07135	-6.03581	9.39e-09	1.11e-06	Significantly downregulated (Adj-P<0.01)
ENSG00000171606.17_ZNF274	ZNF274	-0.367027	3.53026	-6.01615	1.04e-08	1.19e-06	Significantly downregulated (Adj-P<0.01)
ENSG00000113811.10_SELENOK	SELENOK	-0.251057	5.60969	-6.02977	9.68e-09	1.13e-06	Significantly downregulated (Adj-P<0.01)
ENSG00000134901.12_KDELC1	KDELC1	0.632055	-0.601001	6.00154	1.12e-08	1.25e-06	Significantly upregulated (Adj-P<0.01)
ENSG00000205978.5_NYNRIN	NYNRIN	0.430656	2.64531	5.98843	1.2e-08	1.31e-06	Significantly upregulated (Adj-P<0.01)
ENSG00000166343.9_MSS51	MSS51	0.470856	7.42582	6.00693	1.09e-08	1.23e-06	Significantly upregulated (Adj-P<0.01)
ENSG00000243989.8_ACY1	ACY1	0.363586	3.73567	5.99706	1.14e-08	1.26e-06	Significantly upregulated (Adj-P<0.01)
ENSG00000119048.7_UBE2B	UBE2B	-0.239877	7.07936	-5.9977	1.14e-08	1.26e-06	Significantly downregulated (Adj-P<0.01)
ENSG00000265751.1_AC015878.1	AC015878.1	0.842207	2.0729	5.95045	1.45e-08	1.58e-06	Significantly upregulated (Adj-P<0.01)
ENSG00000125848.9_FLRT3	FLRT3	-0.703626	2.40134	-5.92737	1.63e-08	1.73e-06	Significantly downregulated (Adj-P<0.01)
ENSG00000143061.17_IGSF3	IGSF3	0.553608	1.45116	5.91092	1.77e-08	1.82e-06	Significantly upregulated (Adj-P<0.01)
ENSG00000123444.13_KBTBD4	KBTBD4	-0.201829	4.08946	-5.94525	1.49e-08	1.61e-06	Significantly downregulated (Adj-P<0.01)
ENSG00000224281.4_SLC25A5-AS1	SLC25A5-AS1	0.402154	0.864025	5.8875	1.99e-08	1.98e-06	Significantly upregulated (Adj-P<0.01)
ENSG00000113083.13_LOX	LOX	0.798952	0.585785	5.88803	1.99e-08	1.98e-06	Significantly upregulated (Adj-P<0.01)
ENSG00000138279.15_ANXA7	ANXA7	-0.162842	6.66394	-5.92545	1.65e-08	1.73e-06	Significantly downregulated (Adj-P<0.01)
ENSG00000112769.18_LAMA4	LAMA4	0.602224	3.87346	5.92045	1.69e-08	1.75e-06	Significantly upregulated (Adj-P<0.01)
ENSG00000083896.12_YTHDC1	YTHDC1	-0.220637	5.51415	-5.92736	1.63e-08	1.73e-06	Significantly downregulated (Adj-P<0.01)
ENSG00000182944.17_EWSR1	EWSR1	-0.147809	6.60674	-5.9221	1.67e-08	1.75e-06	Significantly downregulated (Adj-P<0.01)
ENSG00000261371.5_PECAM1	PECAM1	0.502876	5.30812	5.92554	1.64e-08	1.73e-06	Significantly upregulated (Adj-P<0.01)
ENSG00000112902.11_SEMA5A	SEMA5A	0.500963	1.99919	5.87474	2.13e-08	2.1e-06	Significantly upregulated (Adj-P<0.01)
ENSG00000165914.14_TTC7B	TTC7B	0.282018	5.08134	5.91294	1.75e-08	1.81e-06	Significantly upregulated (Adj-P<0.01)
ENSG00000185624.14_P4HB	P4HB	-0.200736	7.534	-5.90221	1.85e-08	1.88e-06	Significantly downregulated (Adj-P<0.01)
ENSG00000139644.12_TMBIM6	TMBIM6	-0.199239	7.33917	-5.90193	1.85e-08	1.88e-06	Significantly downregulated (Adj-P<0.01)
ENSG00000066056.13_TIE1	TIE1	0.427971	3.67125	5.8892	1.98e-08	1.98e-06	Significantly upregulated (Adj-P<0.01)
ENSG00000160753.15_RUSC1	RUSC1	0.256045	3.03128	5.8679	2.2e-08	2.12e-06	Significantly upregulated (Adj-P<0.01)
ENSG00000078549.14_ADCYAP1R1	ADCYAP1R1	0.741955	0.458569	5.83328	2.62e-08	2.41e-06	Significantly upregulated (Adj-P<0.01)
ENSG00000179010.14_MRFAP1	MRFAP1	-0.169266	7.54417	-5.86891	2.19e-08	2.12e-06	Significantly downregulated (Adj-P<0.01)
ENSG00000131069.19_ACSS2	ACSS2	-0.239478	6.90696	-5.86967	2.18e-08	2.12e-06	Significantly downregulated (Adj-P<0.01)
ENSG00000179776.18_CDH5	CDH5	0.466189	5.00531	5.87116	2.16e-08	2.12e-06	Significantly upregulated (Adj-P<0.01)
ENSG00000197283.16_SYNGAP1	SYNGAP1	0.457348	1.48501	5.82131	2.78e-08	2.54e-06	Significantly upregulated (Adj-P<0.01)
ENSG00000113141.17_IK	IK	-0.167501	5.93445	-5.86625	2.22e-08	2.12e-06	Significantly downregulated (Adj-P<0.01)
ENSG00000141905.18_NFIC	NFIC	-0.282954	8.00151	-5.85352	2.36e-08	2.22e-06	Significantly downregulated (Adj-P<0.01)
ENSG00000171055.14_FEZ2	FEZ2	-0.518016	6.7316	-5.85369	2.36e-08	2.22e-06	Significantly downregulated (Adj-P<0.01)
ENSG00000276644.4_DACH1	DACH1	0.566754	1.0264	5.8026	3.05e-08	2.74e-06	Significantly upregulated (Adj-P<0.01)
ENSG00000092929.11_UNC13D	UNC13D	-0.473452	2.92759	-5.83265	2.62e-08	2.41e-06	Significantly downregulated (Adj-P<0.01)
ENSG00000143479.16_DYRK3	DYRK3	0.784445	-1.10592	5.85558	2.34e-08	2.22e-06	Significantly upregulated (Adj-P<0.01)
ENSG00000166295.8_ANAPC16	ANAPC16	-0.204374	7.1779	-5.83782	2.56e-08	2.38e-06	Significantly downregulated (Adj-P<0.01)
ENSG00000185361.8_TNFAIP8L1	TNFAIP8L1	0.389073	2.56364	5.81181	2.91e-08	2.64e-06	Significantly upregulated (Adj-P<0.01)
ENSG00000125810.9_CD93	CD93	0.536968	5.19049	5.83859	2.55e-08	2.38e-06	Significantly upregulated (Adj-P<0.01)
ENSG00000158555.14_GDPD5	GDPD5	0.381037	2.93128	5.80601	3e-08	2.71e-06	Significantly upregulated (Adj-P<0.01)
ENSG00000127863.15_TNFRSF19	TNFRSF19	0.687671	1.53382	5.76847	3.62e-08	3.17e-06	Significantly upregulated (Adj-P<0.01)
ENSG00000157404.15_KIT	KIT	0.823775	0.271449	5.76202	3.73e-08	3.24e-06	Significantly upregulated (Adj-P<0.01)
ENSG00000168066.20_SF1	SF1	-0.17874	6.73304	-5.78978	3.25e-08	2.9e-06	Significantly downregulated (Adj-P<0.01)
ENSG00000205302.6_SNX2	SNX2	-0.165248	4.29395	-5.78818	3.28e-08	2.91e-06	Significantly downregulated (Adj-P<0.01)
ENSG00000137509.10_PRCP	PRCP	0.39872	3.06748	5.77124	3.57e-08	3.15e-06	Significantly upregulated (Adj-P<0.01)
ENSG00000087258.14_GNAO1	GNAO1	0.474001	1.15994	5.72437	4.5e-08	3.74e-06	Significantly upregulated (Adj-P<0.01)
ENSG00000146966.12_DENND2A	DENND2A	0.399086	2.2139	5.72722	4.44e-08	3.7e-06	Significantly upregulated (Adj-P<0.01)
ENSG00000087245.12_MMP2	MMP2	0.668527	4.5339	5.76439	3.69e-08	3.22e-06	Significantly upregulated (Adj-P<0.01)
ENSG00000139880.19_CDH24	CDH24	0.819962	-0.494924	5.71563	4.7e-08	3.85e-06	Significantly upregulated (Adj-P<0.01)
ENSG00000147231.13_CXorf57	CXorf57	-0.49727	2.11825	-5.71496	4.71e-08	3.85e-06	Significantly downregulated (Adj-P<0.01)
ENSG00000130158.13_DOCK6	DOCK6	0.422421	4.21132	5.75631	3.84e-08	3.29e-06	Significantly upregulated (Adj-P<0.01)
ENSG00000113721.13_PDGFRB	PDGFRB	0.393648	5.17521	5.75989	3.77e-08	3.25e-06	Significantly upregulated (Adj-P<0.01)
ENSG00000117724.12_CENPF	CENPF	0.789005	-1.14343	5.75398	3.89e-08	3.32e-06	Significantly upregulated (Adj-P<0.01)
ENSG00000198168.8_SVIP	SVIP	-0.324239	3.31591	-5.73737	4.22e-08	3.54e-06	Significantly downregulated (Adj-P<0.01)
ENSG00000124181.14_PLCG1	PLCG1	0.212878	4.85249	5.74758	4.01e-08	3.4e-06	Significantly upregulated (Adj-P<0.01)
ENSG00000156453.13_PCDH1	PCDH1	0.442982	2.81233	5.71908	4.62e-08	3.82e-06	Significantly upregulated (Adj-P<0.01)
ENSG00000103145.10_HCFC1R1	HCFC1R1	0.600509	6.04484	5.73918	4.18e-08	3.53e-06	Significantly upregulated (Adj-P<0.01)
ENSG00000105810.9_CDK6	CDK6	0.528289	2.0473	5.6906	5.32e-08	4.28e-06	Significantly upregulated (Adj-P<0.01)
ENSG00000184232.8_OAF	OAF	0.592366	2.67843	5.7089	4.86e-08	3.95e-06	Significantly upregulated (Adj-P<0.01)
ENSG00000169129.14_AFAP1L2	AFAP1L2	0.489172	1.46134	5.67883	5.63e-08	4.47e-06	Significantly upregulated (Adj-P<0.01)
ENSG00000184497.12_TMEM255B	TMEM255B	0.535817	0.558763	5.67171	5.84e-08	4.56e-06	Significantly upregulated (Adj-P<0.01)
ENSG00000175274.18_TP53I11	TP53I11	0.449236	2.61553	5.68473	5.47e-08	4.36e-06	Significantly upregulated (Adj-P<0.01)
ENSG00000158270.11_COLEC12	COLEC12	0.594586	2.46646	5.67549	5.73e-08	4.52e-06	Significantly upregulated (Adj-P<0.01)
ENSG00000149256.15_TENM4	TENM4	0.726066	0.691234	5.64317	6.71e-08	5.12e-06	Significantly upregulated (Adj-P<0.01)
ENSG00000121361.3_KCNJ8	KCNJ8	0.44119	2.38085	5.66429	6.05e-08	4.66e-06	Significantly upregulated (Adj-P<0.01)
ENSG00000184787.18_UBE2G2	UBE2G2	-0.133612	6.65696	-5.69264	5.26e-08	4.26e-06	Significantly downregulated (Adj-P<0.01)
ENSG00000102119.10_EMD	EMD	-0.21592	5.21527	-5.68669	5.42e-08	4.34e-06	Significantly downregulated (Adj-P<0.01)
ENSG00000006118.14_TMEM132A	TMEM132A	0.427722	1.63904	5.63658	6.94e-08	5.23e-06	Significantly upregulated (Adj-P<0.01)
ENSG00000108878.4_CACNG1	CACNG1	-0.297939	6.6098	-5.67445	5.76e-08	4.52e-06	Significantly downregulated (Adj-P<0.01)
ENSG00000087116.15_ADAMTS2	ADAMTS2	0.880801	1.04615	5.62169	7.46e-08	5.55e-06	Significantly upregulated (Adj-P<0.01)
ENSG00000176435.6_CLEC14A	CLEC14A	0.364539	4.12131	5.66858	5.93e-08	4.58e-06	Significantly upregulated (Adj-P<0.01)
ENSG00000126945.8_HNRNPH2	HNRNPH2	-0.169691	5.69667	-5.67074	5.86e-08	4.56e-06	Significantly downregulated (Adj-P<0.01)
ENSG00000167535.7_CACNB3	CACNB3	0.511087	0.40314	5.59962	8.31e-08	6.09e-06	Significantly upregulated (Adj-P<0.01)
ENSG00000121671.11_CRY2	CRY2	-0.232937	7.03884	-5.64296	6.72e-08	5.12e-06	Significantly downregulated (Adj-P<0.01)
ENSG00000162576.16_MXRA8	MXRA8	0.421574	4.34543	5.64079	6.79e-08	5.15e-06	Significantly upregulated (Adj-P<0.01)
ENSG00000149257.14_SERPINH1	SERPINH1	0.460582	3.68516	5.63197	7.09e-08	5.33e-06	Significantly upregulated (Adj-P<0.01)
ENSG00000144152.12_FBLN7	FBLN7	0.641745	-0.448425	5.5806	9.12e-08	6.63e-06	Significantly upregulated (Adj-P<0.01)
ENSG00000106459.14_NRF1	NRF1	-0.251744	3.79857	-5.61766	7.61e-08	5.63e-06	Significantly downregulated (Adj-P<0.01)
ENSG00000099783.11_HNRNPM	HNRNPM	-0.289202	6.94053	-5.62245	7.43e-08	5.55e-06	Significantly downregulated (Adj-P<0.01)
ENSG00000143147.14_GPR161	GPR161	0.45809	0.770679	5.56256	9.95e-08	7.13e-06	Significantly upregulated (Adj-P<0.01)
ENSG00000101265.15_RASSF2	RASSF2	0.794145	0.958053	5.55474	1.03e-07	7.31e-06	Significantly upregulated (Adj-P<0.01)
ENSG00000163909.7_HEYL	HEYL	0.449419	2.06983	5.57382	9.42e-08	6.82e-06	Significantly upregulated (Adj-P<0.01)
ENSG00000187605.15_TET3	TET3	0.332062	1.85983	5.55753	1.02e-07	7.24e-06	Significantly upregulated (Adj-P<0.01)
ENSG00000141756.18_FKBP10	FKBP10	0.485617	2.31918	5.56558	9.81e-08	7.06e-06	Significantly upregulated (Adj-P<0.01)
ENSG00000265241.6_RBM8A	RBM8A	-0.17227	5.85478	-5.58262	9.03e-08	6.59e-06	Significantly downregulated (Adj-P<0.01)
ENSG00000121005.8_CRISPLD1	CRISPLD1	1.23254	-1.85259	5.60793	7.98e-08	5.88e-06	Significantly upregulated (Adj-P<0.01)
ENSG00000130309.10_COLGALT1	COLGALT1	0.264327	4.085	5.56019	1.01e-07	7.18e-06	Significantly upregulated (Adj-P<0.01)
ENSG00000118257.16_NRP2	NRP2	0.723128	1.37514	5.50593	1.31e-07	8.86e-06	Significantly upregulated (Adj-P<0.01)
ENSG00000121774.17_KHDRBS1	KHDRBS1	-0.16098	5.35832	-5.55183	1.05e-07	7.38e-06	Significantly downregulated (Adj-P<0.01)
ENSG00000010292.12_NCAPD2	NCAPD2	0.206734	3.55869	5.53574	1.13e-07	7.84e-06	Significantly upregulated (Adj-P<0.01)
ENSG00000236104.2_ZBTB22	ZBTB22	0.352898	2.27521	5.5095	1.29e-07	8.75e-06	Significantly upregulated (Adj-P<0.01)
ENSG00000108819.10_PPP1R9B	PPP1R9B	0.333152	3.92969	5.53893	1.12e-07	7.75e-06	Significantly upregulated (Adj-P<0.01)
ENSG00000003056.7_M6PR	M6PR	-0.13329	4.90173	-5.54283	1.1e-07	7.68e-06	Significantly downregulated (Adj-P<0.01)
ENSG00000239857.6_GET4	GET4	-0.2651	5.05668	-5.53997	1.11e-07	7.75e-06	Significantly downregulated (Adj-P<0.01)
ENSG00000140067.6_FAM181A	FAM181A	0.769939	-0.569249	5.48085	1.48e-07	9.75e-06	Significantly upregulated (Adj-P<0.01)
ENSG00000124766.6_SOX4	SOX4	0.592617	2.23978	5.49217	1.4e-07	9.35e-06	Significantly upregulated (Adj-P<0.01)
ENSG00000176222.8_ZNF404	ZNF404	-0.470997	1.12539	-5.46957	1.56e-07	1.01e-05	Significantly downregulated (Adj-P<0.01)
ENSG00000106025.8_TSPAN12	TSPAN12	0.50545	0.91691	5.46529	1.59e-07	1.01e-05	Significantly upregulated (Adj-P<0.01)
ENSG00000125170.10_DOK4	DOK4	0.449802	0.901036	5.46646	1.58e-07	1.01e-05	Significantly upregulated (Adj-P<0.01)
ENSG00000166579.15_NDEL1	NDEL1	-0.161033	4.83286	-5.52855	1.17e-07	8.08e-06	Significantly downregulated (Adj-P<0.01)
ENSG00000186603.5_HPDL	HPDL	0.659796	-0.396613	5.46678	1.58e-07	1.01e-05	Significantly upregulated (Adj-P<0.01)
ENSG00000255471.1_AP001528.2	AP001528.2	0.579059	0.148718	5.46403	1.6e-07	1.01e-05	Significantly upregulated (Adj-P<0.01)
ENSG00000181585.4_TMIE	TMIE	0.560172	0.241065	5.45706	1.66e-07	1.04e-05	Significantly upregulated (Adj-P<0.01)
ENSG00000135829.16_DHX9	DHX9	-0.173078	5.42215	-5.52159	1.21e-07	8.32e-06	Significantly downregulated (Adj-P<0.01)
ENSG00000178947.8_SMIM10L2A	SMIM10L2A	0.511604	-0.885624	5.47587	1.51e-07	9.86e-06	Significantly upregulated (Adj-P<0.01)
ENSG00000166130.14_IKBIP	IKBIP	0.51195	0.494581	5.44558	1.75e-07	1.09e-05	Significantly upregulated (Adj-P<0.01)
ENSG00000272047.2_GTF2H5	GTF2H5	-0.199633	5.03171	-5.51058	1.28e-07	8.74e-06	Significantly downregulated (Adj-P<0.01)
ENSG00000156298.12_TSPAN7	TSPAN7	-0.204405	6.63136	-5.50146	1.34e-07	8.98e-06	Significantly downregulated (Adj-P<0.01)
ENSG00000132622.10_HSPA12B	HSPA12B	0.390408	3.25753	5.48709	1.43e-07	9.54e-06	Significantly upregulated (Adj-P<0.01)
ENSG00000134717.17_BTF3L4	BTF3L4	-0.179333	5.17588	-5.50364	1.32e-07	8.92e-06	Significantly downregulated (Adj-P<0.01)
ENSG00000100065.14_CARD10	CARD10	0.38261	2.8442	5.4759	1.51e-07	9.86e-06	Significantly upregulated (Adj-P<0.01)
ENSG00000161328.10_LRRC56	LRRC56	0.755499	0.778121	5.4353	1.84e-07	1.14e-05	Significantly upregulated (Adj-P<0.01)
ENSG00000136237.18_RAPGEF5	RAPGEF5	0.538228	2.39999	5.45511	1.67e-07	1.05e-05	Significantly upregulated (Adj-P<0.01)
ENSG00000165810.16_BTNL9	BTNL9	0.531755	5.37052	5.48566	1.44e-07	9.56e-06	Significantly upregulated (Adj-P<0.01)
ENSG00000156535.14_CD109	CD109	0.546969	1.55928	5.42834	1.9e-07	1.17e-05	Significantly upregulated (Adj-P<0.01)
ENSG00000106819.11_ASPN	ASPN	0.816161	2.02479	5.43338	1.86e-07	1.14e-05	Significantly upregulated (Adj-P<0.01)
ENSG00000091592.15_NLRP1	NLRP1	0.376493	3.50854	5.46607	1.59e-07	1.01e-05	Significantly upregulated (Adj-P<0.01)
ENSG00000004399.12_PLXND1	PLXND1	0.379144	4.64893	5.47793	1.5e-07	9.84e-06	Significantly upregulated (Adj-P<0.01)
ENSG00000117594.9_HSD11B1	HSD11B1	-0.611359	0.239378	-5.41109	2.06e-07	1.23e-05	Significantly downregulated (Adj-P<0.01)
ENSG00000126749.15_EMG1	EMG1	-0.157028	4.22141	-5.46996	1.56e-07	1.01e-05	Significantly downregulated (Adj-P<0.01)
ENSG00000182963.9_GJC1	GJC1	0.452191	2.40863	5.41729	2e-07	1.2e-05	Significantly upregulated (Adj-P<0.01)
ENSG00000153310.19_FAM49B	FAM49B	-0.21814	4.75401	-5.45977	1.64e-07	1.03e-05	Significantly downregulated (Adj-P<0.01)
ENSG00000162881.6_OXER1	OXER1	0.787311	-1.40295	5.4236	1.94e-07	1.19e-05	Significantly upregulated (Adj-P<0.01)
ENSG00000117450.13_PRDX1	PRDX1	-0.216321	6.7074	-5.44239	1.78e-07	1.1e-05	Significantly downregulated (Adj-P<0.01)
ENSG00000092529.23_CAPN3	CAPN3	-0.195585	9.54395	-5.41942	1.98e-07	1.2e-05	Significantly downregulated (Adj-P<0.01)
ENSG00000165475.14_CRYL1	CRYL1	-0.228259	2.66075	-5.40403	2.14e-07	1.27e-05	Significantly downregulated (Adj-P<0.01)
ENSG00000183160.8_TMEM119	TMEM119	0.878133	-0.144538	5.36406	2.58e-07	1.48e-05	Significantly upregulated (Adj-P<0.01)
ENSG00000214944.9_ARHGEF28	ARHGEF28	0.515188	-0.00778135	5.35795	2.66e-07	1.51e-05	Significantly upregulated (Adj-P<0.01)
ENSG00000126785.12_RHOJ	RHOJ	0.339884	2.40864	5.38381	2.35e-07	1.39e-05	Significantly upregulated (Adj-P<0.01)
ENSG00000166348.18_USP54	USP54	-0.440776	7.17444	-5.41692	2.01e-07	1.2e-05	Significantly downregulated (Adj-P<0.01)
ENSG00000204301.6_NOTCH4	NOTCH4	0.413733	4.9212	5.42181	1.96e-07	1.19e-05	Significantly upregulated (Adj-P<0.01)
ENSG00000196199.13_MPHOSPH8	MPHOSPH8	-0.169767	4.83746	-5.42009	1.98e-07	1.2e-05	Significantly downregulated (Adj-P<0.01)
ENSG00000283632.2_EXOC3L2	EXOC3L2	0.714128	-0.784785	5.35995	2.63e-07	1.5e-05	Significantly upregulated (Adj-P<0.01)
ENSG00000153714.5_LURAP1L	LURAP1L	0.536823	-0.109889	5.34537	2.82e-07	1.58e-05	Significantly upregulated (Adj-P<0.01)
ENSG00000180190.11_TDRP	TDRP	0.412413	0.560297	5.34105	2.88e-07	1.59e-05	Significantly upregulated (Adj-P<0.01)
ENSG00000184220.11_CMSS1	CMSS1	-0.373274	3.24507	-5.37695	2.43e-07	1.42e-05	Significantly downregulated (Adj-P<0.01)
ENSG00000196476.11_C20orf96	C20orf96	0.457082	-0.524757	5.33329	2.99e-07	1.64e-05	Significantly upregulated (Adj-P<0.01)
ENSG00000136114.16_THSD1	THSD1	0.323315	1.68955	5.34344	2.85e-07	1.59e-05	Significantly upregulated (Adj-P<0.01)
ENSG00000272168.6_CASC15	CASC15	0.659675	-0.215753	5.32859	3.06e-07	1.67e-05	Significantly upregulated (Adj-P<0.01)
ENSG00000164125.15_FAM198B	FAM198B	0.533862	3.7116	5.3804	2.39e-07	1.41e-05	Significantly upregulated (Adj-P<0.01)
ENSG00000159433.11_STARD9	STARD9	0.38008	3.86838	5.3848	2.34e-07	1.39e-05	Significantly upregulated (Adj-P<0.01)
ENSG00000179855.6_GIPC3	GIPC3	0.500588	0.374684	5.3196	3.19e-07	1.71e-05	Significantly upregulated (Adj-P<0.01)
ENSG00000157870.15_PRXL2B	PRXL2B	0.533816	0.734497	5.31712	3.23e-07	1.72e-05	Significantly upregulated (Adj-P<0.01)
ENSG00000222009.8_BTBD19	BTBD19	0.494853	0.210668	5.31399	3.27e-07	1.73e-05	Significantly upregulated (Adj-P<0.01)
ENSG00000100650.15_SRSF5	SRSF5	-0.230037	7.50707	-5.37238	2.48e-07	1.44e-05	Significantly downregulated (Adj-P<0.01)
ENSG00000135924.15_DNAJB2	DNAJB2	-0.279601	6.64822	-5.37544	2.45e-07	1.43e-05	Significantly downregulated (Adj-P<0.01)
ENSG00000182197.11_EXT1	EXT1	0.322134	2.22852	5.33041	3.03e-07	1.66e-05	Significantly upregulated (Adj-P<0.01)
ENSG00000241839.9_PLEKHO2	PLEKHO2	0.479865	1.84373	5.32366	3.13e-07	1.69e-05	Significantly upregulated (Adj-P<0.01)
ENSG00000144746.6_ARL6IP5	ARL6IP5	-0.19551	6.98771	-5.36651	2.55e-07	1.47e-05	Significantly downregulated (Adj-P<0.01)
ENSG00000159593.14_NAE1	NAE1	-0.162241	4.21473	-5.36563	2.56e-07	1.47e-05	Significantly downregulated (Adj-P<0.01)
ENSG00000145191.13_EIF2B5	EIF2B5	-0.149797	5.6078	-5.37085	2.5e-07	1.45e-05	Significantly downregulated (Adj-P<0.01)
ENSG00000132681.16_ATP1A4	ATP1A4	-0.537531	0.889685	-5.29281	3.62e-07	1.84e-05	Significantly downregulated (Adj-P<0.01)
ENSG00000183496.5_MEX3B	MEX3B	0.411849	0.960139	5.29431	3.59e-07	1.84e-05	Significantly upregulated (Adj-P<0.01)
ENSG00000196655.11_TRAPPC4	TRAPPC4	-0.187159	3.77003	-5.34986	2.76e-07	1.55e-05	Significantly downregulated (Adj-P<0.01)
ENSG00000100220.11_RTCB	RTCB	-0.143089	4.97976	-5.35965	2.64e-07	1.5e-05	Significantly downregulated (Adj-P<0.01)
ENSG00000168918.13_INPP5D	INPP5D	0.497488	1.6135	5.29779	3.53e-07	1.82e-05	Significantly upregulated (Adj-P<0.01)
ENSG00000271895.2_AL109811.3	AL109811.3	-0.299691	2.51941	-5.30948	3.34e-07	1.76e-05	Significantly downregulated (Adj-P<0.01)
ENSG00000136986.9_DERL1	DERL1	-0.359519	5.49787	-5.35	2.76e-07	1.55e-05	Significantly downregulated (Adj-P<0.01)
ENSG00000131373.14_HACL1	HACL1	-0.226285	3.28152	-5.32534	3.1e-07	1.68e-05	Significantly downregulated (Adj-P<0.01)
ENSG00000167244.19_IGF2	IGF2	0.546459	6.16858	5.34627	2.81e-07	1.58e-05	Significantly upregulated (Adj-P<0.01)
ENSG00000187522.15_HSPA14	HSPA14	-0.252474	3.12324	-5.31911	3.2e-07	1.71e-05	Significantly downregulated (Adj-P<0.01)
ENSG00000008018.8_PSMB1	PSMB1	-0.167828	5.98109	-5.34164	2.87e-07	1.59e-05	Significantly downregulated (Adj-P<0.01)
ENSG00000182224.11_CYB5D1	CYB5D1	0.233415	2.98122	5.31324	3.29e-07	1.73e-05	Significantly upregulated (Adj-P<0.01)
ENSG00000117133.10_RPF1	RPF1	-0.177878	3.90854	-5.32699	3.08e-07	1.67e-05	Significantly downregulated (Adj-P<0.01)
ENSG00000157554.18_ERG	ERG	0.399742	2.74458	5.30222	3.46e-07	1.8e-05	Significantly upregulated (Adj-P<0.01)
ENSG00000160058.18_BSDC1	BSDC1	-0.149298	5.15328	-5.33299	2.99e-07	1.64e-05	Significantly downregulated (Adj-P<0.01)
ENSG00000081277.12_PKP1	PKP1	0.635003	2.03408	5.28419	3.77e-07	1.91e-05	Significantly upregulated (Adj-P<0.01)
ENSG00000197558.11_SSPO	SSPO	0.683047	-0.436049	5.25604	4.3e-07	2.12e-05	Significantly upregulated (Adj-P<0.01)
ENSG00000117020.16_AKT3	AKT3	0.333203	3.14073	5.29733	3.54e-07	1.82e-05	Significantly upregulated (Adj-P<0.01)
ENSG00000170989.9_S1PR1	S1PR1	0.387818	3.43717	5.30004	3.5e-07	1.82e-05	Significantly upregulated (Adj-P<0.01)
ENSG00000175591.11_P2RY2	P2RY2	-0.257351	4.81859	-5.31689	3.23e-07	1.72e-05	Significantly downregulated (Adj-P<0.01)
ENSG00000100462.15_PRMT5	PRMT5	-0.172874	4.77487	-5.31608	3.24e-07	1.72e-05	Significantly downregulated (Adj-P<0.01)
ENSG00000178585.14_CTNNBIP1	CTNNBIP1	0.349144	3.99615	5.30442	3.42e-07	1.79e-05	Significantly upregulated (Adj-P<0.01)
ENSG00000186469.8_GNG2	GNG2	0.546178	1.75663	5.25263	4.37e-07	2.14e-05	Significantly upregulated (Adj-P<0.01)
ENSG00000218283.2_MORF4L1P1	MORF4L1P1	-0.273662	2.89663	-5.2735	3.96e-07	1.99e-05	Significantly downregulated (Adj-P<0.01)
ENSG00000050165.17_DKK3	DKK3	0.454772	2.19441	5.26336	4.15e-07	2.06e-05	Significantly upregulated (Adj-P<0.01)
ENSG00000175130.6_MARCKSL1	MARCKSL1	0.399599	1.73333	5.25634	4.29e-07	2.12e-05	Significantly upregulated (Adj-P<0.01)
ENSG00000277258.4_PCGF2	PCGF2	0.341761	1.59848	5.24861	4.45e-07	2.17e-05	Significantly upregulated (Adj-P<0.01)
ENSG00000088387.18_DOCK9	DOCK9	0.375584	4.12005	5.29838	3.52e-07	1.82e-05	Significantly upregulated (Adj-P<0.01)
ENSG00000280407.2_AC132872.4	AC132872.4	0.499595	0.355112	5.22927	4.87e-07	2.35e-05	Significantly upregulated (Adj-P<0.01)
ENSG00000138668.18_HNRNPD	HNRNPD	-0.13332	6.31156	-5.29551	3.57e-07	1.83e-05	Significantly downregulated (Adj-P<0.01)
ENSG00000168487.18_BMP1	BMP1	0.356441	3.14949	5.2733	3.96e-07	1.99e-05	Significantly upregulated (Adj-P<0.01)
ENSG00000103966.10_EHD4	EHD4	0.475633	2.59905	5.25814	4.26e-07	2.11e-05	Significantly upregulated (Adj-P<0.01)
ENSG00000184014.7_DENND5A	DENND5A	0.234608	4.41951	5.28437	3.76e-07	1.91e-05	Significantly upregulated (Adj-P<0.01)
ENSG00000184113.9_CLDN5	CLDN5	0.474745	3.81155	5.27506	3.93e-07	1.98e-05	Significantly upregulated (Adj-P<0.01)
ENSG00000010810.17_FYN	FYN	0.396058	2.65162	5.24732	4.48e-07	2.17e-05	Significantly upregulated (Adj-P<0.01)
ENSG00000175471.19_MCTP1	MCTP1	0.584837	0.598486	5.20269	5.51e-07	2.61e-05	Significantly upregulated (Adj-P<0.01)
ENSG00000206549.13_PRSS50	PRSS50	-0.807184	1.88132	-5.21828	5.13e-07	2.45e-05	Significantly downregulated (Adj-P<0.01)
ENSG00000115129.13_TP53I3	TP53I3	0.575227	0.830306	5.20091	5.56e-07	2.62e-05	Significantly upregulated (Adj-P<0.01)
ENSG00000123560.13_PLP1	PLP1	0.895785	-0.593258	5.20332	5.5e-07	2.61e-05	Significantly upregulated (Adj-P<0.01)
ENSG00000184990.12_SIVA1	SIVA1	-0.305367	5.71745	-5.2671	4.08e-07	2.04e-05	Significantly downregulated (Adj-P<0.01)
ENSG00000024422.11_EHD2	EHD2	0.422186	4.65993	5.26643	4.09e-07	2.04e-05	Significantly upregulated (Adj-P<0.01)
ENSG00000079257.7_LXN	LXN	0.578451	0.219803	5.18478	5.99e-07	2.77e-05	Significantly upregulated (Adj-P<0.01)
ENSG00000163961.4_RNF168	RNF168	0.244905	4.24914	5.24798	4.46e-07	2.17e-05	Significantly upregulated (Adj-P<0.01)
ENSG00000250208.6_FZD10-DT	FZD10-DT	0.549422	0.188598	5.17588	6.25e-07	2.84e-05	Significantly upregulated (Adj-P<0.01)
ENSG00000196562.14_SULF2	SULF2	0.402722	2.94377	5.22292	5.02e-07	2.41e-05	Significantly upregulated (Adj-P<0.01)
ENSG00000099953.9_MMP11	MMP11	0.548735	-0.709111	5.18162	6.08e-07	2.78e-05	Significantly upregulated (Adj-P<0.01)
ENSG00000057757.9_PITHD1	PITHD1	-0.174196	5.04544	-5.25014	4.42e-07	2.16e-05	Significantly downregulated (Adj-P<0.01)
ENSG00000139625.12_MAP3K12	MAP3K12	0.348977	1.70172	5.19353	5.75e-07	2.7e-05	Significantly upregulated (Adj-P<0.01)
ENSG00000143545.8_RAB13	RAB13	0.330336	3.88825	5.23335	4.78e-07	2.31e-05	Significantly upregulated (Adj-P<0.01)
ENSG00000171840.11_NINJ2	NINJ2	0.722822	1.91398	5.18384	6.02e-07	2.77e-05	Significantly upregulated (Adj-P<0.01)
ENSG00000106665.15_CLIP2	CLIP2	0.384773	1.65877	5.17487	6.28e-07	2.84e-05	Significantly upregulated (Adj-P<0.01)
ENSG00000170312.15_CDK1	CDK1	0.615995	-1.04013	5.17653	6.23e-07	2.84e-05	Significantly upregulated (Adj-P<0.01)
ENSG00000113456.18_RAD1	RAD1	0.217993	4.32087	5.21761	5.14e-07	2.45e-05	Significantly upregulated (Adj-P<0.01)
ENSG00000106823.12_ECM2	ECM2	0.621638	2.62476	5.18489	5.99e-07	2.77e-05	Significantly upregulated (Adj-P<0.01)
ENSG00000178175.11_ZNF366	ZNF366	0.517944	1.68693	5.15773	6.79e-07	3.04e-05	Significantly upregulated (Adj-P<0.01)
ENSG00000235865.2_GSN-AS1	GSN-AS1	0.678449	-0.370334	5.13921	7.4e-07	3.28e-05	Significantly upregulated (Adj-P<0.01)
ENSG00000198478.7_SH3BGRL2	SH3BGRL2	0.440926	2.52947	5.17494	6.27e-07	2.84e-05	Significantly upregulated (Adj-P<0.01)
ENSG00000179051.13_RCC2	RCC2	0.264888	2.9332	5.18653	5.94e-07	2.76e-05	Significantly upregulated (Adj-P<0.01)
ENSG00000178035.11_IMPDH2	IMPDH2	-0.220977	6.22245	-5.21401	5.23e-07	2.49e-05	Significantly downregulated (Adj-P<0.01)
ENSG00000163565.18_IFI16	IFI16	0.444443	2.80015	5.18211	6.07e-07	2.78e-05	Significantly upregulated (Adj-P<0.01)
ENSG00000128656.13_CHN1	CHN1	0.523484	-0.0888748	5.12954	7.74e-07	3.41e-05	Significantly upregulated (Adj-P<0.01)
ENSG00000168334.8_XIRP1	XIRP1	-0.624394	8.01854	-5.19463	5.73e-07	2.69e-05	Significantly downregulated (Adj-P<0.01)
ENSG00000083817.8_ZNF416	ZNF416	-0.315026	1.29442	-5.12867	7.77e-07	3.41e-05	Significantly downregulated (Adj-P<0.01)
ENSG00000108953.16_YWHAE	YWHAE	-0.135983	8.24078	-5.18662	5.94e-07	2.76e-05	Significantly downregulated (Adj-P<0.01)
ENSG00000114812.12_VIPR1	VIPR1	0.671906	0.0717945	5.12048	8.07e-07	3.5e-05	Significantly upregulated (Adj-P<0.01)
ENSG00000133935.6_ERG28	ERG28	-0.178085	2.90675	-5.1654	6.56e-07	2.96e-05	Significantly downregulated (Adj-P<0.01)
ENSG00000185721.12_DRG1	DRG1	-0.174083	5.63169	-5.1864	5.95e-07	2.76e-05	Significantly downregulated (Adj-P<0.01)
ENSG00000280007.1_AC008079.1	AC008079.1	0.518795	2.82994	5.15311	6.94e-07	3.09e-05	Significantly upregulated (Adj-P<0.01)
ENSG00000258708.1_SLC25A21-AS1	SLC25A21-AS1	-0.460088	0.164292	-5.09989	8.87e-07	3.78e-05	Significantly downregulated (Adj-P<0.01)
ENSG00000023697.12_DERA	DERA	0.206361	3.52147	5.15794	6.79e-07	3.04e-05	Significantly upregulated (Adj-P<0.01)
ENSG00000072786.12_STK10	STK10	0.436075	2.32141	5.12804	7.79e-07	3.41e-05	Significantly upregulated (Adj-P<0.01)
ENSG00000123243.14_ITIH5	ITIH5	0.459499	4.44115	5.16443	6.59e-07	2.96e-05	Significantly upregulated (Adj-P<0.01)
ENSG00000135486.17_HNRNPA1	HNRNPA1	-0.165403	7.90417	-5.15375	6.92e-07	3.09e-05	Significantly downregulated (Adj-P<0.01)
ENSG00000142973.13_CYP4B1	CYP4B1	-0.805818	1.92676	-5.09383	9.12e-07	3.87e-05	Significantly downregulated (Adj-P<0.01)
ENSG00000132718.8_SYT11	SYT11	0.388119	1.78273	5.10059	8.84e-07	3.78e-05	Significantly upregulated (Adj-P<0.01)
ENSG00000261167.1_AC107027.3	AC107027.3	-0.317116	2.14946	-5.09649	9.01e-07	3.83e-05	Significantly downregulated (Adj-P<0.01)
ENSG00000109061.9_MYH1	MYH1	-1.61699	11.8263	-5.10165	8.8e-07	3.77e-05	Significantly downregulated (Adj-P<0.01)
ENSG00000142396.10_ERVK3-1	ERVK3-1	-0.207739	3.39571	-5.12514	7.9e-07	3.44e-05	Significantly downregulated (Adj-P<0.01)
ENSG00000179772.7_FOXS1	FOXS1	0.75713	-1.1636	5.07807	9.8e-07	4.07e-05	Significantly upregulated (Adj-P<0.01)
ENSG00000057468.6_MSH4	MSH4	-0.734217	-0.86888	-5.08708	9.41e-07	3.97e-05	Significantly downregulated (Adj-P<0.01)
ENSG00000178922.16_HYI	HYI	-0.32012	3.83636	-5.12499	7.9e-07	3.44e-05	Significantly downregulated (Adj-P<0.01)
ENSG00000126217.20_MCF2L	MCF2L	0.382627	4.52151	5.12902	7.76e-07	3.41e-05	Significantly upregulated (Adj-P<0.01)
ENSG00000162882.14_HAAO	HAAO	0.534191	-0.122301	5.04689	1.13e-06	4.58e-05	Significantly upregulated (Adj-P<0.01)
ENSG00000105402.7_NAPA	NAPA	-0.174272	6.05825	-5.12784	7.8e-07	3.41e-05	Significantly downregulated (Adj-P<0.01)
ENSG00000227591.5_AL031316.1	AL031316.1	-0.690227	-0.362949	-5.0514	1.11e-06	4.55e-05	Significantly downregulated (Adj-P<0.01)
ENSG00000104824.17_HNRNPL	HNRNPL	-0.163082	6.78546	-5.11085	8.43e-07	3.65e-05	Significantly downregulated (Adj-P<0.01)
ENSG00000205730.6_ITPRIPL2	ITPRIPL2	0.237336	4.07764	5.10513	8.66e-07	3.73e-05	Significantly upregulated (Adj-P<0.01)
ENSG00000147408.14_CSGALNACT1	CSGALNACT1	0.447642	1.76915	5.04971	1.12e-06	4.55e-05	Significantly upregulated (Adj-P<0.01)
ENSG00000176105.13_YES1	YES1	0.287504	3.49398	5.08949	9.3e-07	3.94e-05	Significantly upregulated (Adj-P<0.01)
ENSG00000137486.16_ARRB1	ARRB1	0.364962	2.28663	5.06174	1.06e-06	4.36e-05	Significantly upregulated (Adj-P<0.01)
ENSG00000101150.17_TPD52L2	TPD52L2	-0.118492	5.46883	-5.10201	8.78e-07	3.77e-05	Significantly downregulated (Adj-P<0.01)
ENSG00000168453.14_HR	HR	0.751641	0.00662234	5.01316	1.32e-06	5.22e-05	Significantly upregulated (Adj-P<0.01)
ENSG00000070031.3_SCT	SCT	1.26046	-2.28483	5.05042	1.11e-06	4.55e-05	Significantly upregulated (Adj-P<0.01)
ENSG00000151388.10_ADAMTS12	ADAMTS12	0.624742	0.483961	5.01202	1.32e-06	5.24e-05	Significantly upregulated (Adj-P<0.01)
ENSG00000157570.11_TSPAN18	TSPAN18	0.361611	3.40549	5.0758	9.9e-07	4.1e-05	Significantly upregulated (Adj-P<0.01)
ENSG00000111647.12_UHRF1BP1L	UHRF1BP1L	0.353796	3.89459	5.08221	9.62e-07	4.03e-05	Significantly upregulated (Adj-P<0.01)
ENSG00000099998.17_GGT5	GGT5	0.518513	1.93266	5.03778	1.18e-06	4.76e-05	Significantly upregulated (Adj-P<0.01)
ENSG00000028310.17_BRD9	BRD9	-0.146909	4.37884	-5.08426	9.53e-07	4.01e-05	Significantly downregulated (Adj-P<0.01)
ENSG00000108840.15_HDAC5	HDAC5	-0.229503	6.4928	-5.07961	9.73e-07	4.06e-05	Significantly downregulated (Adj-P<0.01)
ENSG00000123358.19_NR4A1	NR4A1	-0.656097	5.41755	-5.08261	9.6e-07	4.03e-05	Significantly downregulated (Adj-P<0.01)
ENSG00000187091.13_PLCD1	PLCD1	0.31926	1.61904	5.01835	1.29e-06	5.16e-05	Significantly upregulated (Adj-P<0.01)
ENSG00000121073.14_SLC35B1	SLC35B1	-0.189034	4.81146	-5.07898	9.76e-07	4.06e-05	Significantly downregulated (Adj-P<0.01)
ENSG00000116793.15_PHTF1	PHTF1	0.336884	1.21844	4.98338	1.51e-06	5.74e-05	Significantly upregulated (Adj-P<0.01)
ENSG00000224189.7_HAGLR	HAGLR	0.719319	-1.2126	4.993	1.44e-06	5.54e-05	Significantly upregulated (Adj-P<0.01)
ENSG00000243725.6_TTC4	TTC4	-0.215764	4.49918	-5.04928	1.12e-06	4.55e-05	Significantly downregulated (Adj-P<0.01)
ENSG00000121966.6_CXCR4	CXCR4	0.654041	-0.095333	4.96585	1.63e-06	6.06e-05	Significantly upregulated (Adj-P<0.01)
ENSG00000147274.14_RBMX	RBMX	-0.203237	6.25125	-5.04998	1.11e-06	4.55e-05	Significantly downregulated (Adj-P<0.01)
ENSG00000167881.14_SRP68	SRP68	-0.119508	6.08174	-5.04908	1.12e-06	4.55e-05	Significantly downregulated (Adj-P<0.01)
ENSG00000223768.2_LINC00205	LINC00205	0.374342	1.3984	4.98056	1.53e-06	5.78e-05	Significantly upregulated (Adj-P<0.01)
ENSG00000136830.11_FAM129B	FAM129B	0.323275	3.69565	5.03768	1.18e-06	4.76e-05	Significantly upregulated (Adj-P<0.01)
ENSG00000124160.11_NCOA5	NCOA5	-0.185222	3.60324	-5.03113	1.21e-06	4.89e-05	Significantly downregulated (Adj-P<0.01)
ENSG00000115457.9_IGFBP2	IGFBP2	0.480188	2.19668	5.00053	1.4e-06	5.42e-05	Significantly upregulated (Adj-P<0.01)
ENSG00000096093.15_EFHC1	EFHC1	0.323769	1.61863	4.97786	1.55e-06	5.83e-05	Significantly upregulated (Adj-P<0.01)
ENSG00000204396.10_VWA7	VWA7	-0.296362	3.41232	-5.01787	1.29e-06	5.16e-05	Significantly downregulated (Adj-P<0.01)
ENSG00000171121.16_KCNMB3	KCNMB3	0.504013	-0.4483	4.95289	1.73e-06	6.32e-05	Significantly upregulated (Adj-P<0.01)
ENSG00000136161.12_RCBTB2	RCBTB2	0.29295	2.90484	4.99792	1.41e-06	5.44e-05	Significantly upregulated (Adj-P<0.01)
ENSG00000089818.17_NECAP1	NECAP1	-0.220563	3.38049	-5.00815	1.35e-06	5.3e-05	Significantly downregulated (Adj-P<0.01)
ENSG00000100139.13_MICALL1	MICALL1	0.230402	3.53647	5.01385	1.31e-06	5.22e-05	Significantly upregulated (Adj-P<0.01)
ENSG00000185291.11_IL3RA	IL3RA	0.40112	0.134651	4.93809	1.85e-06	6.61e-05	Significantly upregulated (Adj-P<0.01)
ENSG00000185291.11_PAR_Y_IL3RA	PAR	0.40112	0.134651	4.93809	1.85e-06	6.61e-05	Significantly upregulated (Adj-P<0.01)
ENSG00000183688.4_RFLNB	RFLNB	0.347075	3.21792	4.99442	1.43e-06	5.52e-05	Significantly upregulated (Adj-P<0.01)
ENSG00000139329.4_LUM	LUM	0.73926	4.09509	5.01316	1.32e-06	5.22e-05	Significantly upregulated (Adj-P<0.01)
ENSG00000131876.16_SNRPA1	SNRPA1	-0.181523	3.4473	-4.9986	1.41e-06	5.44e-05	Significantly downregulated (Adj-P<0.01)
ENSG00000136141.14_LRCH1	LRCH1	0.3678	1.92318	4.95894	1.68e-06	6.17e-05	Significantly upregulated (Adj-P<0.01)
ENSG00000159640.15_ACE	ACE	0.438829	3.77466	5.00704	1.35e-06	5.3e-05	Significantly upregulated (Adj-P<0.01)
ENSG00000157916.19_RER1	RER1	-0.113948	5.66048	-5.01722	1.29e-06	5.17e-05	Significantly downregulated (Adj-P<0.01)
ENSG00000117480.15_FAAH	FAAH	-0.339687	3.80056	-5.00415	1.37e-06	5.35e-05	Significantly downregulated (Adj-P<0.01)
ENSG00000109016.17_DHRS7B	DHRS7B	-0.227369	4.29974	-5.00705	1.35e-06	5.3e-05	Significantly downregulated (Adj-P<0.01)
ENSG00000106483.11_SFRP4	SFRP4	0.87619	2.24825	4.96619	1.63e-06	6.06e-05	Significantly upregulated (Adj-P<0.01)
ENSG00000251322.7_SHANK3	SHANK3	0.383918	5.31328	5.00846	1.35e-06	5.3e-05	Significantly upregulated (Adj-P<0.01)
ENSG00000168016.14_TRANK1	TRANK1	0.457183	1.42706	4.9383	1.85e-06	6.61e-05	Significantly upregulated (Adj-P<0.01)
ENSG00000068697.6_LAPTM4A	LAPTM4A	-0.130116	6.15759	-5.00607	1.36e-06	5.31e-05	Significantly downregulated (Adj-P<0.01)
ENSG00000150760.12_DOCK1	DOCK1	0.402576	2.89316	4.97117	1.59e-06	5.97e-05	Significantly upregulated (Adj-P<0.01)
ENSG00000120318.15_ARAP3	ARAP3	0.349351	3.23836	4.98032	1.53e-06	5.78e-05	Significantly upregulated (Adj-P<0.01)
ENSG00000137876.9_RSL24D1	RSL24D1	-0.164299	5.4805	-4.9996	1.4e-06	5.43e-05	Significantly downregulated (Adj-P<0.01)
ENSG00000021300.13_PLEKHB1	PLEKHB1	0.384496	2.27975	4.9494	1.76e-06	6.4e-05	Significantly upregulated (Adj-P<0.01)
ENSG00000005513.9_SOX8	SOX8	0.65833	0.158202	4.90641	2.13e-06	7.43e-05	Significantly upregulated (Adj-P<0.01)
ENSG00000165280.15_VCP	VCP	-0.152656	7.8885	-4.981	1.52e-06	5.78e-05	Significantly downregulated (Adj-P<0.01)
ENSG00000138594.13_TMOD3	TMOD3	0.314401	3.06392	4.95793	1.69e-06	6.19e-05	Significantly upregulated (Adj-P<0.01)
ENSG00000110958.15_PTGES3	PTGES3	-0.200448	6.79687	-4.98425	1.5e-06	5.74e-05	Significantly downregulated (Adj-P<0.01)
ENSG00000100227.17_POLDIP3	POLDIP3	-0.177173	5.00353	-4.98526	1.5e-06	5.72e-05	Significantly downregulated (Adj-P<0.01)
ENSG00000070371.15_CLTCL1	CLTCL1	-0.27095	7.03454	-4.97733	1.55e-06	5.83e-05	Significantly downregulated (Adj-P<0.01)
ENSG00000111961.17_SASH1	SASH1	0.355909	4.28495	4.97495	1.57e-06	5.88e-05	Significantly upregulated (Adj-P<0.01)
ENSG00000105722.9_ERF	ERF	0.399835	2.21151	4.93714	1.86e-06	6.61e-05	Significantly upregulated (Adj-P<0.01)
ENSG00000013619.13_MAMLD1	MAMLD1	-0.334676	2.63122	-4.93145	1.9e-06	6.77e-05	Significantly downregulated (Adj-P<0.01)
ENSG00000133872.13_SARAF	SARAF	-0.139757	6.4997	-4.97022	1.6e-06	5.97e-05	Significantly downregulated (Adj-P<0.01)
ENSG00000163359.15_COL6A3	COL6A3	0.481179	6.30992	4.96994	1.6e-06	5.97e-05	Significantly upregulated (Adj-P<0.01)
ENSG00000188130.13_MAPK12	MAPK12	-0.275461	7.50675	-4.96029	1.67e-06	6.15e-05	Significantly downregulated (Adj-P<0.01)
ENSG00000064300.8_NGFR	NGFR	1.00261	-0.642712	4.87992	2.4e-06	8.06e-05	Significantly upregulated (Adj-P<0.01)
ENSG00000165730.15_STOX1	STOX1	0.709048	0.0106347	4.88022	2.4e-06	8.06e-05	Significantly upregulated (Adj-P<0.01)
ENSG00000230561.4_CCDC192	CCDC192	-0.980983	-1.73656	-4.96166	1.66e-06	6.13e-05	Significantly downregulated (Adj-P<0.01)
ENSG00000173264.14_GPR137	GPR137	0.32423	2.16982	4.92306	1.98e-06	6.98e-05	Significantly upregulated (Adj-P<0.01)
ENSG00000244486.8_SCARF2	SCARF2	0.432071	0.652121	4.88562	2.34e-06	7.93e-05	Significantly upregulated (Adj-P<0.01)
ENSG00000185222.9_TCEAL9	TCEAL9	0.352868	1.71958	4.90296	2.16e-06	7.48e-05	Significantly upregulated (Adj-P<0.01)
ENSG00000100399.15_CHADL	CHADL	0.391739	0.467719	4.88161	2.38e-06	8.04e-05	Significantly upregulated (Adj-P<0.01)
ENSG00000135862.5_LAMC1	LAMC1	0.257542	6.35824	4.96472	1.64e-06	6.07e-05	Significantly upregulated (Adj-P<0.01)
ENSG00000196628.16_TCF4	TCF4	0.26991	5.31697	4.96368	1.65e-06	6.09e-05	Significantly upregulated (Adj-P<0.01)
ENSG00000154783.11_FGD5	FGD5	0.407335	2.82196	4.92672	1.95e-06	6.89e-05	Significantly upregulated (Adj-P<0.01)
ENSG00000090621.13_PABPC4	PABPC4	0.195843	8.48664	4.94203	1.82e-06	6.56e-05	Significantly upregulated (Adj-P<0.01)
ENSG00000115687.13_PASK	PASK	0.387034	0.576491	4.87197	2.48e-06	8.32e-05	Significantly upregulated (Adj-P<0.01)
ENSG00000181019.12_NQO1	NQO1	0.516424	2.55739	4.916	2.04e-06	7.17e-05	Significantly upregulated (Adj-P<0.01)
ENSG00000143387.12_CTSK	CTSK	0.516693	1.96978	4.90321	2.16e-06	7.48e-05	Significantly upregulated (Adj-P<0.01)
ENSG00000255690.2_TRIL	TRIL	0.490051	2.05535	4.90133	2.18e-06	7.5e-05	Significantly upregulated (Adj-P<0.01)
ENSG00000134369.15_NAV1	NAV1	0.336996	3.65915	4.93873	1.84e-06	6.61e-05	Significantly upregulated (Adj-P<0.01)
ENSG00000151458.11_ANKRD50	ANKRD50	0.361162	1.94444	4.88942	2.3e-06	7.83e-05	Significantly upregulated (Adj-P<0.01)
ENSG00000087085.14_ACHE	ACHE	-0.403035	6.64165	-4.94685	1.78e-06	6.44e-05	Significantly downregulated (Adj-P<0.01)
ENSG00000134954.14_ETS1	ETS1	0.396829	4.47445	4.94687	1.78e-06	6.44e-05	Significantly upregulated (Adj-P<0.01)
ENSG00000132334.16_PTPRE	PTPRE	0.596908	0.626464	4.86185	2.6e-06	8.61e-05	Significantly upregulated (Adj-P<0.01)
ENSG00000126457.21_PRMT1	PRMT1	-0.223063	6.6257	-4.94361	1.8e-06	6.52e-05	Significantly downregulated (Adj-P<0.01)
ENSG00000100023.18_PPIL2	PPIL2	-0.132766	4.71874	-4.93744	1.85e-06	6.61e-05	Significantly downregulated (Adj-P<0.01)
ENSG00000100395.14_L3MBTL2	L3MBTL2	-0.189656	3.9699	-4.9215	1.99e-06	7.01e-05	Significantly downregulated (Adj-P<0.01)
ENSG00000197859.9_ADAMTSL2	ADAMTSL2	0.584266	2.84687	4.89949	2.2e-06	7.55e-05	Significantly upregulated (Adj-P<0.01)
ENSG00000154065.16_ANKRD29	ANKRD29	0.44267	1.70577	4.86113	2.61e-06	8.62e-05	Significantly upregulated (Adj-P<0.01)
ENSG00000178695.5_KCTD12	KCTD12	0.390702	4.78436	4.92617	1.95e-06	6.9e-05	Significantly upregulated (Adj-P<0.01)
ENSG00000198844.11_ARHGEF15	ARHGEF15	0.342497	3.37295	4.90686	2.13e-06	7.43e-05	Significantly upregulated (Adj-P<0.01)
ENSG00000006715.15_VPS41	VPS41	0.17961	3.49801	4.90244	2.17e-06	7.48e-05	Significantly upregulated (Adj-P<0.01)
ENSG00000169902.14_TPST1	TPST1	0.434583	0.370493	4.83021	2.99e-06	9.61e-05	Significantly upregulated (Adj-P<0.01)
ENSG00000137726.16_FXYD6	FXYD6	0.282589	3.3604	4.8985	2.21e-06	7.57e-05	Significantly upregulated (Adj-P<0.01)
ENSG00000106723.16_SPIN1	SPIN1	0.372844	2.75362	4.87257	2.48e-06	8.31e-05	Significantly upregulated (Adj-P<0.01)
ENSG00000159352.15_PSMD4	PSMD4	-0.176214	6.7216	-4.90658	2.13e-06	7.43e-05	Significantly downregulated (Adj-P<0.01)
ENSG00000254535.3_PABPC4L	PABPC4L	0.746039	-1.49244	4.86718	2.54e-06	8.48e-05	Significantly upregulated (Adj-P<0.01)
ENSG00000205323.8_SARNP	SARNP	-0.180334	4.54619	-4.90555	2.14e-06	7.43e-05	Significantly downregulated (Adj-P<0.01)
ENSG00000167680.15_SEMA6B	SEMA6B	0.398969	2.35464	4.86654	2.55e-06	8.48e-05	Significantly upregulated (Adj-P<0.01)
ENSG00000110696.9_C11orf58	C11orf58	-0.143884	6.14494	-4.90604	2.13e-06	7.43e-05	Significantly downregulated (Adj-P<0.01)
ENSG00000260807.6_AC009041.2	AC009041.2	0.648819	0.401077	4.8223	3.1e-06	9.81e-05	Significantly upregulated (Adj-P<0.01)
ENSG00000111335.12_OAS2	OAS2	0.604709	1.28658	4.82554	3.05e-06	9.73e-05	Significantly upregulated (Adj-P<0.01)
ENSG00000134817.10_APLNR	APLNR	0.464275	3.91118	4.89213	2.27e-06	7.75e-05	Significantly upregulated (Adj-P<0.01)
ENSG00000185245.7_GP1BA	GP1BA	0.49997	1.18804	4.81676	3.17e-06	9.94e-05	Significantly upregulated (Adj-P<0.01)
ENSG00000108219.14_TSPAN14	TSPAN14	0.275723	3.88855	4.88608	2.33e-06	7.93e-05	Significantly upregulated (Adj-P<0.01)
ENSG00000124193.14_SRSF6	SRSF6	-0.177394	5.79911	-4.89347	2.26e-06	7.72e-05	Significantly downregulated (Adj-P<0.01)
ENSG00000107736.20_CDH23	CDH23	0.428928	2.78548	4.85829	2.64e-06	8.69e-05	Significantly upregulated (Adj-P<0.01)
ENSG00000115935.17_WIPF1	WIPF1	0.431774	2.36719	4.84032	2.86e-06	9.29e-05	Significantly upregulated (Adj-P<0.01)
ENSG00000163995.19_ABLIM2	ABLIM2	-0.283364	6.77141	-4.88415	2.35e-06	7.96e-05	Significantly downregulated (Adj-P<0.01)
ENSG00000144339.11_TMEFF2	TMEFF2	0.926958	-1.30942	4.81127	3.25e-06	0.000101477	Significantly upregulated (Adj-P<0.01)
ENSG00000153140.8_CETN3	CETN3	-0.235058	2.47665	-4.83455	2.93e-06	9.48e-05	Significantly downregulated (Adj-P<0.01)
ENSG00000183943.5_PRKX	PRKX	0.410471	1.37175	4.8063	3.32e-06	0.000103314	Significantly upregulated (Adj-P<0.01)
ENSG00000175040.5_CHST2	CHST2	0.469806	0.515734	4.7918	3.54e-06	0.000109261	Significantly upregulated (Adj-P<0.01)
ENSG00000176907.4_TCIM	TCIM	0.422578	2.31544	4.82887	3.01e-06	9.64e-05	Significantly upregulated (Adj-P<0.01)
ENSG00000104415.14_WISP1	WISP1	1.05754	-1.72355	4.82098	3.12e-06	9.81e-05	Significantly upregulated (Adj-P<0.01)
ENSG00000130032.15_PRRG3	PRRG3	0.479201	0.565109	4.7795	3.74e-06	0.000113133	Significantly upregulated (Adj-P<0.01)
ENSG00000114346.13_ECT2	ECT2	0.381844	0.587589	4.77266	3.85e-06	0.000115756	Significantly upregulated (Adj-P<0.01)
ENSG00000213949.8_ITGA1	ITGA1	0.423604	4.24929	4.8594	2.63e-06	8.67e-05	Significantly upregulated (Adj-P<0.01)
ENSG00000182533.6_CAV3	CAV3	-0.257146	5.86197	-4.86311	2.58e-06	8.58e-05	Significantly downregulated (Adj-P<0.01)
ENSG00000167476.10_JSRP1	JSRP1	-0.317764	7.1561	-4.85407	2.69e-06	8.82e-05	Significantly downregulated (Adj-P<0.01)
ENSG00000189266.12_PNRC2	PNRC2	-0.215368	5.36101	-4.86326	2.58e-06	8.58e-05	Significantly downregulated (Adj-P<0.01)
ENSG00000100865.14_CINP	CINP	-0.185436	3.61088	-4.84467	2.81e-06	9.17e-05	Significantly downregulated (Adj-P<0.01)
ENSG00000167524.14_SGK494	SGK494	-0.252792	2.42614	-4.80671	3.32e-06	0.000103314	Significantly downregulated (Adj-P<0.01)
ENSG00000162086.14_ZNF75A	ZNF75A	-0.209421	3.10548	-4.82215	3.1e-06	9.81e-05	Significantly downregulated (Adj-P<0.01)
ENSG00000163956.11_LRPAP1	LRPAP1	-0.193554	5.45048	-4.85488	2.68e-06	8.8e-05	Significantly downregulated (Adj-P<0.01)
ENSG00000162444.11_RBP7	RBP7	0.647457	0.176099	4.7587	4.1e-06	0.000121504	Significantly upregulated (Adj-P<0.01)
ENSG00000169604.19_ANTXR1	ANTXR1	0.442986	3.60078	4.8363	2.91e-06	9.44e-05	Significantly upregulated (Adj-P<0.01)
ENSG00000126524.9_SBDS	SBDS	-0.214014	7.2571	-4.84273	2.83e-06	9.23e-05	Significantly downregulated (Adj-P<0.01)
ENSG00000164930.11_FZD6	FZD6	0.433176	1.3735	4.76932	3.91e-06	0.0001167	Significantly upregulated (Adj-P<0.01)
ENSG00000187837.3_HIST1H1C	HIST1H1C	-0.362823	4.33509	-4.8424	2.83e-06	9.23e-05	Significantly downregulated (Adj-P<0.01)
ENSG00000121297.6_TSHZ3	TSHZ3	0.377796	0.79185	4.75838	4.1e-06	0.000121504	Significantly upregulated (Adj-P<0.01)
ENSG00000085276.17_MECOM	MECOM	0.453598	2.06245	4.78489	3.65e-06	0.000111955	Significantly upregulated (Adj-P<0.01)
ENSG00000166432.14_ZMAT1	ZMAT1	-0.331967	2.53537	-4.79318	3.52e-06	0.000109025	Significantly downregulated (Adj-P<0.01)
ENSG00000279145.2_AC011912.1	AC011912.1	-0.648343	-0.297319	-4.74832	4.29e-06	0.000126021	Significantly downregulated (Adj-P<0.01)
ENSG00000110395.6_CBL	CBL	0.313659	2.52095	4.79261	3.53e-06	0.000109087	Significantly upregulated (Adj-P<0.01)
ENSG00000008283.15_CYB561	CYB561	0.378944	1.72284	4.77295	3.85e-06	0.000115756	Significantly upregulated (Adj-P<0.01)
ENSG00000260914.3_AC026464.4	AC026464.4	-0.254913	4.93294	-4.83518	2.93e-06	9.47e-05	Significantly downregulated (Adj-P<0.01)
ENSG00000076685.18_NT5C2	NT5C2	-0.274179	6.78015	-4.82691	3.03e-06	9.7e-05	Significantly downregulated (Adj-P<0.01)
ENSG00000140350.15_ANP32A	ANP32A	-0.129871	5.34394	-4.83231	2.96e-06	9.55e-05	Significantly downregulated (Adj-P<0.01)
ENSG00000040341.17_STAU2	STAU2	0.205136	6.16933	4.83002	2.99e-06	9.61e-05	Significantly upregulated (Adj-P<0.01)
ENSG00000108344.14_PSMD3	PSMD3	-0.172533	6.6405	-4.82529	3.06e-06	9.73e-05	Significantly downregulated (Adj-P<0.01)
ENSG00000188716.5_DUPD1	DUPD1	-0.279898	3.67202	-4.81516	3.2e-06	9.99e-05	Significantly downregulated (Adj-P<0.01)
ENSG00000273611.4_ZNHIT3	ZNHIT3	-0.156953	4.09949	-4.8216	3.11e-06	9.81e-05	Significantly downregulated (Adj-P<0.01)
ENSG00000136783.9_NIPSNAP3A	NIPSNAP3A	0.367365	2.83836	4.79514	3.49e-06	0.000108303	Significantly upregulated (Adj-P<0.01)
ENSG00000093100.13_AC016026.1	AC016026.1	-0.345852	4.15155	-4.8207	3.12e-06	9.81e-05	Significantly downregulated (Adj-P<0.01)
ENSG00000133121.20_STARD13	STARD13	0.279302	2.65034	4.78322	3.68e-06	0.000112141	Significantly upregulated (Adj-P<0.01)
ENSG00000135253.13_KCP	KCP	0.502033	-0.19152	4.72662	4.71e-06	0.000136495	Significantly upregulated (Adj-P<0.01)
ENSG00000155265.10_GOLGA7B	GOLGA7B	-0.528388	2.60839	-4.78127	3.71e-06	0.000112882	Significantly downregulated (Adj-P<0.01)
ENSG00000122367.19_LDB3	LDB3	-0.221412	11.053	-4.78036	3.73e-06	0.000113119	Significantly downregulated (Adj-P<0.01)
ENSG00000198130.15_HIBCH	HIBCH	0.29017	4.75694	4.82147	3.11e-06	9.81e-05	Significantly upregulated (Adj-P<0.01)
ENSG00000198901.13_PRC1	PRC1	0.462162	0.153679	4.72372	4.77e-06	0.000137468	Significantly upregulated (Adj-P<0.01)
ENSG00000002834.17_LASP1	LASP1	0.322661	4.25737	4.81688	3.17e-06	9.94e-05	Significantly upregulated (Adj-P<0.01)
ENSG00000088320.3_REM1	REM1	0.523253	-0.32782	4.7216	4.82e-06	0.000138492	Significantly upregulated (Adj-P<0.01)
ENSG00000132464.11_ENAM	ENAM	-0.424411	2.80157	-4.77248	3.86e-06	0.000115756	Significantly downregulated (Adj-P<0.01)
ENSG00000127951.6_FGL2	FGL2	0.578355	3.16604	4.78905	3.59e-06	0.000110372	Significantly upregulated (Adj-P<0.01)
ENSG00000109089.7_CDR2L	CDR2L	0.407735	0.871188	4.72542	4.74e-06	0.000136706	Significantly upregulated (Adj-P<0.01)
ENSG00000127946.16_HIP1	HIP1	0.285007	3.26864	4.78497	3.65e-06	0.000111955	Significantly upregulated (Adj-P<0.01)
ENSG00000134247.9_PTGFRN	PTGFRN	0.474505	2.33889	4.76067	4.06e-06	0.000120752	Significantly upregulated (Adj-P<0.01)
ENSG00000116396.14_KCNC4	KCNC4	0.443255	2.94252	4.77833	3.76e-06	0.000113474	Significantly upregulated (Adj-P<0.01)
ENSG00000186352.8_ANKRD37	ANKRD37	-0.421792	3.18061	-4.77058	3.89e-06	0.000116355	Significantly downregulated (Adj-P<0.01)
ENSG00000172361.5_CFAP53	CFAP53	-0.502304	-0.241754	-4.70006	5.29e-06	0.000149618	Significantly downregulated (Adj-P<0.01)
ENSG00000155660.10_PDIA4	PDIA4	0.239519	2.68153	4.75453	4.17e-06	0.000123339	Significantly upregulated (Adj-P<0.01)
ENSG00000018408.14_WWTR1	WWTR1	0.322678	3.87675	4.77945	3.74e-06	0.000113133	Significantly upregulated (Adj-P<0.01)
ENSG00000184277.12_TM2D3	TM2D3	-0.139501	4.27996	-4.78448	3.66e-06	0.000111955	Significantly downregulated (Adj-P<0.01)
ENSG00000169242.11_EFNA1	EFNA1	0.402311	1.60149	4.71794	4.89e-06	0.000139947	Significantly upregulated (Adj-P<0.01)
ENSG00000136504.11_KAT7	KAT7	-0.167602	5.1803	-4.78398	3.67e-06	0.000111981	Significantly downregulated (Adj-P<0.01)
ENSG00000082196.20_C1QTNF3	C1QTNF3	0.479415	1.5345	4.70834	5.1e-06	0.000144596	Significantly upregulated (Adj-P<0.01)
ENSG00000225205.5_AC078883.1	AC078883.1	0.63398	-1.53988	4.70964	5.07e-06	0.0001443	Significantly upregulated (Adj-P<0.01)
ENSG00000187800.13_PEAR1	PEAR1	0.337979	3.13102	4.75105	4.24e-06	0.000124997	Significantly upregulated (Adj-P<0.01)
ENSG00000169504.14_CLIC4	CLIC4	0.43628	4.78715	4.77043	3.89e-06	0.000116355	Significantly upregulated (Adj-P<0.01)
ENSG00000173692.12_PSMD1	PSMD1	-0.167656	6.71681	-4.76452	3.99e-06	0.000118957	Significantly downregulated (Adj-P<0.01)
ENSG00000213516.9_RBMXL1	RBMXL1	-0.252407	2.72316	-4.72044	4.84e-06	0.000138685	Significantly downregulated (Adj-P<0.01)
ENSG00000196329.11_GIMAP5	GIMAP5	0.358182	2.98378	4.73589	4.53e-06	0.000131817	Significantly upregulated (Adj-P<0.01)
ENSG00000163872.15_YEATS2	YEATS2	0.194943	3.32787	4.74325	4.38e-06	0.000128363	Significantly upregulated (Adj-P<0.01)
ENSG00000006756.15_ARSD	ARSD	0.400513	0.817393	4.67253	5.96e-06	0.000165001	Significantly upregulated (Adj-P<0.01)
ENSG00000198715.12_GLMP	GLMP	0.308028	1.57407	4.69409	5.43e-06	0.000152719	Significantly upregulated (Adj-P<0.01)
ENSG00000151689.12_INPP1	INPP1	0.252117	3.1627	4.73618	4.52e-06	0.000131817	Significantly upregulated (Adj-P<0.01)
ENSG00000131477.10_RAMP2	RAMP2	0.333724	2.56278	4.7209	4.83e-06	0.000138661	Significantly upregulated (Adj-P<0.01)
ENSG00000174903.15_RAB1B	RAB1B	-0.169382	6.96174	-4.74871	4.28e-06	0.000126021	Significantly downregulated (Adj-P<0.01)
ENSG00000122566.21_HNRNPA2B1	HNRNPA2B1	-0.127987	9.05323	-4.72942	4.66e-06	0.000135088	Significantly downregulated (Adj-P<0.01)
ENSG00000129467.13_ADCY4	ADCY4	0.344053	3.60864	4.73999	4.45e-06	0.000129964	Significantly upregulated (Adj-P<0.01)
ENSG00000109846.7_CRYAB	CRYAB	-0.329294	9.70478	-4.7125	5.01e-06	0.000142779	Significantly downregulated (Adj-P<0.01)
ENSG00000166197.16_NOLC1	NOLC1	-0.157988	5.37004	-4.74354	4.38e-06	0.000128363	Significantly downregulated (Adj-P<0.01)
ENSG00000197496.5_SLC2A10	SLC2A10	0.51942	0.0174251	4.63773	6.92e-06	0.000185687	Significantly upregulated (Adj-P<0.01)
ENSG00000143458.11_GABPB2	GABPB2	-0.234317	4.00334	-4.72973	4.65e-06	0.000135088	Significantly downregulated (Adj-P<0.01)
ENSG00000215788.10_TNFRSF25	TNFRSF25	0.42726	1.90567	4.67925	5.79e-06	0.000161413	Significantly upregulated (Adj-P<0.01)
ENSG00000185339.8_TCN2	TCN2	0.425019	1.27598	4.65692	6.38e-06	0.000173446	Significantly upregulated (Adj-P<0.01)
ENSG00000101098.12_RIMS4	RIMS4	-0.649132	0.403794	-4.63311	7.06e-06	0.00018825	Significantly downregulated (Adj-P<0.01)
ENSG00000143797.11_MBOAT2	MBOAT2	0.48234	0.248804	4.62949	7.17e-06	0.000190227	Significantly upregulated (Adj-P<0.01)
ENSG00000177943.13_MAMDC4	MAMDC4	0.37884	2.46669	4.69085	5.51e-06	0.000154326	Significantly upregulated (Adj-P<0.01)
ENSG00000143554.13_SLC27A3	SLC27A3	0.346156	2.26656	4.68083	5.75e-06	0.000160598	Significantly upregulated (Adj-P<0.01)
ENSG00000092203.13_TOX4	TOX4	-0.136623	5.96282	-4.726	4.73e-06	0.00013661	Significantly downregulated (Adj-P<0.01)
ENSG00000185518.11_SV2B	SV2B	0.472901	0.769738	4.62594	7.28e-06	0.000192175	Significantly upregulated (Adj-P<0.01)
ENSG00000235098.8_ANKRD65	ANKRD65	0.500643	0.985105	4.63178	7.1e-06	0.000189011	Significantly upregulated (Adj-P<0.01)
ENSG00000137073.21_UBAP2	UBAP2	-0.213285	5.59087	-4.7169	4.92e-06	0.000140325	Significantly downregulated (Adj-P<0.01)
ENSG00000178467.17_P4HTM	P4HTM	0.264471	3.31578	4.69592	5.39e-06	0.000151786	Significantly upregulated (Adj-P<0.01)
ENSG00000046653.14_GPM6B	GPM6B	0.399621	0.893548	4.61675	7.58e-06	0.00019857	Significantly upregulated (Adj-P<0.01)
ENSG00000155876.5_RRAGA	RRAGA	-0.135103	5.67283	-4.70916	5.09e-06	0.00014434	Significantly downregulated (Adj-P<0.01)
ENSG00000065413.19_ANKRD44	ANKRD44	0.343963	2.41834	4.65858	6.33e-06	0.000172806	Significantly upregulated (Adj-P<0.01)
ENSG00000107819.13_SFXN3	SFXN3	0.332407	2.34459	4.65711	6.37e-06	0.000173446	Significantly upregulated (Adj-P<0.01)
ENSG00000106003.12_LFNG	LFNG	0.593136	0.970404	4.61592	7.6e-06	0.000198945	Significantly upregulated (Adj-P<0.01)
ENSG00000196510.12_ANAPC7	ANAPC7	-0.155169	4.57407	-4.69872	5.32e-06	0.000150221	Significantly downregulated (Adj-P<0.01)
ENSG00000138411.12_HECW2	HECW2	0.616628	2.04346	4.63618	6.97e-06	0.000186415	Significantly upregulated (Adj-P<0.01)
ENSG00000246523.7_AP001528.1	AP001528.1	0.517284	-0.616381	4.59527	8.31e-06	0.000213412	Significantly upregulated (Adj-P<0.01)
ENSG00000172888.11_ZNF621	ZNF621	0.175614	3.27057	4.67275	5.95e-06	0.000165001	Significantly upregulated (Adj-P<0.01)
ENSG00000198830.10_HMGN2	HMGN2	-0.219062	6.31211	-4.69367	5.44e-06	0.000152722	Significantly downregulated (Adj-P<0.01)
ENSG00000131398.13_KCNC3	KCNC3	0.543803	-0.637991	4.58896	8.53e-06	0.000217814	Significantly upregulated (Adj-P<0.01)
ENSG00000125841.12_NRSN2	NRSN2	0.433753	0.297109	4.59314	8.38e-06	0.000214775	Significantly upregulated (Adj-P<0.01)
ENSG00000115310.17_RTN4	RTN4	-0.203331	8.92431	-4.67013	6.02e-06	0.000166426	Significantly downregulated (Adj-P<0.01)
ENSG00000232656.7_IDI2-AS1	IDI2-AS1	0.441552	1.683	4.62554	7.3e-06	0.000192186	Significantly upregulated (Adj-P<0.01)
ENSG00000185989.10_RASA3	RASA3	-0.218112	4.38263	-4.68449	5.66e-06	0.000158357	Significantly downregulated (Adj-P<0.01)
ENSG00000250041.2_AC069360.1	AC069360.1	-0.229225	3.15245	-4.65865	6.33e-06	0.000172806	Significantly downregulated (Adj-P<0.01)
ENSG00000006047.12_YBX2	YBX2	0.48406	0.768637	4.59582	8.29e-06	0.000213255	Significantly upregulated (Adj-P<0.01)
ENSG00000185432.11_METTL7A	METTL7A	-0.442467	6.24569	-4.67755	5.83e-06	0.000162315	Significantly downregulated (Adj-P<0.01)
ENSG00000124228.14_DDX27	DDX27	-0.168874	3.96966	-4.66617	6.13e-06	0.000168412	Significantly downregulated (Adj-P<0.01)
ENSG00000163126.14_ANKRD23	ANKRD23	-0.238651	10.5248	-4.63368	7.05e-06	0.000188109	Significantly downregulated (Adj-P<0.01)
ENSG00000160408.14_ST6GALNAC6	ST6GALNAC6	-0.231376	5.04678	-4.67567	5.88e-06	0.00016335	Significantly downregulated (Adj-P<0.01)
ENSG00000162512.15_SDC3	SDC3	0.378158	3.13843	4.64917	6.59e-06	0.000178104	Significantly upregulated (Adj-P<0.01)
ENSG00000183722.8_LHFPL6	LHFPL6	0.270165	3.52635	4.65591	6.4e-06	0.000173899	Significantly upregulated (Adj-P<0.01)
ENSG00000169885.9_CALML6	CALML6	-0.982732	4.8327	-4.66968	6.03e-06	0.000166458	Significantly downregulated (Adj-P<0.01)
ENSG00000138092.10_CENPO	CENPO	0.242145	1.81519	4.60565	7.95e-06	0.000206176	Significantly upregulated (Adj-P<0.01)
ENSG00000112167.9_SAYSD1	SAYSD1	-0.221537	2.0619	-4.61098	7.77e-06	0.000202192	Significantly downregulated (Adj-P<0.01)
ENSG00000167799.9_NUDT8	NUDT8	0.383	3.38096	4.65472	6.44e-06	0.000174492	Significantly upregulated (Adj-P<0.01)
ENSG00000111145.7_ELK3	ELK3	0.368409	2.77589	4.62978	7.17e-06	0.000190227	Significantly upregulated (Adj-P<0.01)
ENSG00000102226.9_USP11	USP11	-0.210013	4.82705	-4.66773	6.09e-06	0.000167574	Significantly downregulated (Adj-P<0.01)
ENSG00000172977.12_KAT5	KAT5	-0.155366	4.36785	-4.66405	6.18e-06	0.00016966	Significantly downregulated (Adj-P<0.01)
ENSG00000136527.17_TRA2B	TRA2B	-0.140125	5.22248	-4.66312	6.21e-06	0.000170045	Significantly downregulated (Adj-P<0.01)
ENSG00000064692.18_SNCAIP	SNCAIP	0.692485	-1.14957	4.55987	9.66e-06	0.000241824	Significantly upregulated (Adj-P<0.01)
ENSG00000165804.15_ZNF219	ZNF219	-0.290341	4.22922	-4.6532	6.48e-06	0.000175338	Significantly downregulated (Adj-P<0.01)
ENSG00000101306.10_MYLK2	MYLK2	-0.457614	8.74138	-4.63749	6.93e-06	0.000185687	Significantly downregulated (Adj-P<0.01)
ENSG00000148400.10_NOTCH1	NOTCH1	0.335129	3.71808	4.64584	6.69e-06	0.000180362	Significantly upregulated (Adj-P<0.01)
ENSG00000072071.16_ADGRL1	ADGRL1	0.47086	1.2406	4.57338	9.12e-06	0.00023052	Significantly upregulated (Adj-P<0.01)
ENSG00000107731.12_UNC5B	UNC5B	0.465853	1.59724	4.58517	8.67e-06	0.000220645	Significantly upregulated (Adj-P<0.01)
ENSG00000166405.14_RIC3	RIC3	-0.239617	2.47873	-4.60161	8.08e-06	0.000209419	Significantly downregulated (Adj-P<0.01)
ENSG00000100596.6_SPTLC2	SPTLC2	0.257144	3.06999	4.61772	7.55e-06	0.000198072	Significantly upregulated (Adj-P<0.01)
ENSG00000270175.1_AC023509.4	AC023509.4	0.45615	0.124074	4.5427	1.04e-05	0.000255615	Significantly upregulated (Adj-P<0.01)
ENSG00000082684.15_SEMA5B	SEMA5B	0.80434	-0.97891	4.54519	1.03e-05	0.000253757	Significantly upregulated (Adj-P<0.01)
ENSG00000105419.17_MEIS3	MEIS3	0.531562	-0.716789	4.53547	1.07e-05	0.000261513	Significantly upregulated (Adj-P<0.01)
ENSG00000154133.14_ROBO4	ROBO4	0.322713	3.99586	4.63761	6.93e-06	0.000185687	Significantly upregulated (Adj-P<0.01)
ENSG00000272589.1_ZSWIM8-AS1	ZSWIM8-AS1	-0.459929	0.134014	-4.53333	1.08e-05	0.000263478	Significantly downregulated (Adj-P<0.01)
ENSG00000204856.11_FAM216A	FAM216A	0.354819	0.782204	4.54516	1.03e-05	0.000253757	Significantly upregulated (Adj-P<0.01)
ENSG00000136146.14_MED4	MED4	-0.128719	4.61086	-4.63892	6.89e-06	0.000185492	Significantly downregulated (Adj-P<0.01)
ENSG00000262420.3_AC007613.1	AC007613.1	0.505837	0.567544	4.53918	1.05e-05	0.000258237	Significantly upregulated (Adj-P<0.01)
ENSG00000162944.10_RFTN2	RFTN2	0.429202	0.610015	4.53268	1.08e-05	0.000263653	Significantly upregulated (Adj-P<0.01)
ENSG00000172005.10_MAL	MAL	0.566934	-0.970978	4.5266	1.11e-05	0.000268105	Significantly upregulated (Adj-P<0.01)
ENSG00000018189.12_RUFY3	RUFY3	0.201312	4.27944	4.62638	7.27e-06	0.000192143	Significantly upregulated (Adj-P<0.01)
ENSG00000088833.17_NSFL1C	NSFL1C	-0.141089	6.10851	-4.62639	7.27e-06	0.000192143	Significantly downregulated (Adj-P<0.01)
ENSG00000123572.16_NRK	NRK	0.69538	-0.285932	4.51482	1.17e-05	0.000279271	Significantly upregulated (Adj-P<0.01)
ENSG00000278922.1_AC002310.6	AC002310.6	0.37053	2.18481	4.57552	9.04e-06	0.000229169	Significantly upregulated (Adj-P<0.01)
ENSG00000111328.6_CDK2AP1	CDK2AP1	0.236867	4.62303	4.62157	7.42e-06	0.000195161	Significantly upregulated (Adj-P<0.01)
ENSG00000168906.12_MAT2A	MAT2A	-0.178455	7.21013	-4.61446	7.65e-06	0.000199531	Significantly downregulated (Adj-P<0.01)
ENSG00000181588.16_MEX3D	MEX3D	0.424787	0.830138	4.52908	1.1e-05	0.000266189	Significantly upregulated (Adj-P<0.01)
ENSG00000183291.16_SELENOF	SELENOF	-0.146766	4.44826	-4.61462	7.65e-06	0.000199531	Significantly downregulated (Adj-P<0.01)
ENSG00000166794.4_PPIB	PPIB	0.32777	3.45809	4.59784	8.22e-06	0.000212121	Significantly upregulated (Adj-P<0.01)
ENSG00000163762.6_TM4SF18	TM4SF18	0.480525	2.11666	4.55374	9.91e-06	0.000246621	Significantly upregulated (Adj-P<0.01)
ENSG00000154553.14_PDLIM3	PDLIM3	-0.311517	10.9307	-4.56453	9.47e-06	0.000237461	Significantly downregulated (Adj-P<0.01)
ENSG00000162998.4_FRZB	FRZB	0.897754	4.51528	4.60755	7.88e-06	0.000204841	Significantly upregulated (Adj-P<0.01)
ENSG00000170365.9_SMAD1	SMAD1	0.236759	3.03152	4.57348	9.12e-06	0.00023052	Significantly upregulated (Adj-P<0.01)
ENSG00000125458.6_NT5C	NT5C	-0.256565	3.36063	-4.58371	8.73e-06	0.000221665	Significantly downregulated (Adj-P<0.01)
ENSG00000088038.18_CNOT3	CNOT3	-0.182341	4.08746	-4.59301	8.39e-06	0.000214775	Significantly downregulated (Adj-P<0.01)
ENSG00000147471.11_PLPBP	PLPBP	-0.128579	4.75123	-4.59903	8.17e-06	0.000211398	Significantly downregulated (Adj-P<0.01)
ENSG00000080573.6_COL5A3	COL5A3	0.33753	4.45263	4.59618	8.27e-06	0.000213255	Significantly upregulated (Adj-P<0.01)
ENSG00000065427.14_KARS	KARS	-0.136038	6.79948	-4.59207	8.42e-06	0.000215289	Significantly downregulated (Adj-P<0.01)
ENSG00000165633.12_VSTM4	VSTM4	0.315302	2.61744	4.5486	1.01e-05	0.00025127	Significantly upregulated (Adj-P<0.01)
ENSG00000142694.6_EVA1B	EVA1B	0.425946	1.06573	4.50878	1.2e-05	0.00028474	Significantly upregulated (Adj-P<0.01)
ENSG00000164050.12_PLXNB1	PLXNB1	0.428112	1.6084	4.52007	1.14e-05	0.00027441	Significantly upregulated (Adj-P<0.01)
ENSG00000031081.10_ARHGAP31	ARHGAP31	0.429557	2.81277	4.54185	1.04e-05	0.000256128	Significantly upregulated (Adj-P<0.01)
ENSG00000259495.2_AC016705.2	AC016705.2	-0.495947	0.838905	-4.47558	1.38e-05	0.000316393	Significantly downregulated (Adj-P<0.01)
ENSG00000157330.9_C1orf158	C1orf158	-2.13329	-2.27266	-4.58797	8.57e-06	0.000218385	Significantly downregulated (Adj-P<0.01)
ENSG00000136026.13_CKAP4	CKAP4	0.214738	3.15755	4.5498	1.01e-05	0.000250388	Significantly upregulated (Adj-P<0.01)
ENSG00000110880.10_CORO1C	CORO1C	0.264686	3.93571	4.56775	9.34e-06	0.000234978	Significantly upregulated (Adj-P<0.01)
ENSG00000198563.13_DDX39B	DDX39B	-0.138728	7.00874	-4.56829	9.32e-06	0.000234812	Significantly downregulated (Adj-P<0.01)
ENSG00000143382.14_ADAMTSL4	ADAMTSL4	-0.51542	6.35019	-4.57285	9.14e-06	0.000230668	Significantly downregulated (Adj-P<0.01)
ENSG00000181274.6_FRAT2	FRAT2	0.28113	2.92031	4.53208	1.09e-05	0.000263653	Significantly upregulated (Adj-P<0.01)
ENSG00000223953.5_C1QTNF5	C1QTNF5	0.442004	1.72421	4.50072	1.24e-05	0.000293645	Significantly upregulated (Adj-P<0.01)
ENSG00000103855.17_CD276	CD276	0.307701	2.44493	4.52191	1.13e-05	0.000272695	Significantly upregulated (Adj-P<0.01)
ENSG00000132383.11_RPA1	RPA1	-0.155789	6.13064	-4.56484	9.46e-06	0.000237461	Significantly downregulated (Adj-P<0.01)
ENSG00000153933.9_DGKE	DGKE	0.388475	1.51184	4.48174	1.34e-05	0.000311499	Significantly upregulated (Adj-P<0.01)
ENSG00000100219.16_XBP1	XBP1	-0.210438	4.22423	-4.55773	9.75e-06	0.000243251	Significantly downregulated (Adj-P<0.01)
ENSG00000139668.8_WDFY2	WDFY2	0.319631	1.85964	4.4933	1.28e-05	0.000300289	Significantly upregulated (Adj-P<0.01)
ENSG00000106809.10_OGN	OGN	1.00338	0.920177	4.46531	1.44e-05	0.000327897	Significantly upregulated (Adj-P<0.01)
ENSG00000106263.17_EIF3B	EIF3B	-0.163956	6.53537	-4.55885	9.7e-06	0.000242485	Significantly downregulated (Adj-P<0.01)
ENSG00000261269.1_AC093278.2	AC093278.2	0.344358	1.83855	4.48971	1.3e-05	0.000304402	Significantly upregulated (Adj-P<0.01)
ENSG00000187513.8_GJA4	GJA4	0.37586	1.80831	4.48858	1.31e-05	0.000304933	Significantly upregulated (Adj-P<0.01)
ENSG00000100154.14_TTC28	TTC28	0.231047	4.02049	4.54789	1.02e-05	0.000251627	Significantly upregulated (Adj-P<0.01)
ENSG00000149218.4_ENDOD1	ENDOD1	-0.285779	6.39778	-4.55585	9.83e-06	0.000244816	Significantly downregulated (Adj-P<0.01)
ENSG00000174446.12_SNAPC5	SNAPC5	-0.220153	3.63642	-4.53725	1.06e-05	0.000259953	Significantly downregulated (Adj-P<0.01)
ENSG00000133112.16_TPT1	TPT1	-0.170483	12.2492	-4.49598	1.27e-05	0.000297808	Significantly downregulated (Adj-P<0.01)
ENSG00000136802.11_LRRC8A	LRRC8A	0.204293	3.34786	4.53159	1.09e-05	0.000263787	Significantly upregulated (Adj-P<0.01)
ENSG00000182712.15_CMC4	CMC4	0.281953	3.08297	4.52629	1.11e-05	0.000268105	Significantly upregulated (Adj-P<0.01)
ENSG00000172650.13_AGAP5	AGAP5	-0.25508	2.94355	-4.50926	1.2e-05	0.000284599	Significantly downregulated (Adj-P<0.01)
ENSG00000111011.17_RSRC2	RSRC2	-0.114531	5.5132	-4.54462	1.03e-05	0.000253933	Significantly downregulated (Adj-P<0.01)
ENSG00000251595.7_ABCA11P	ABCA11P	-0.277	2.16025	-4.47334	1.39e-05	0.000318902	Significantly downregulated (Adj-P<0.01)
ENSG00000135473.14_PAN2	PAN2	-0.188313	5.27188	-4.53996	1.05e-05	0.000257789	Significantly downregulated (Adj-P<0.01)
ENSG00000108654.14_DDX5	DDX5	-0.157057	7.56933	-4.52771	1.11e-05	0.000267322	Significantly downregulated (Adj-P<0.01)
ENSG00000143924.18_EML4	EML4	0.29375	2.24971	4.47839	1.36e-05	0.000314055	Significantly upregulated (Adj-P<0.01)
ENSG00000168259.14_DNAJC7	DNAJC7	-0.164176	5.57305	-4.53243	1.09e-05	0.000263653	Significantly downregulated (Adj-P<0.01)
ENSG00000104728.15_ARHGEF10	ARHGEF10	0.314982	2.46873	4.47088	1.41e-05	0.000321275	Significantly upregulated (Adj-P<0.01)
ENSG00000163673.7_DCLK3	DCLK3	0.49894	-0.108387	4.40309	1.87e-05	0.000406056	Significantly upregulated (Adj-P<0.01)
ENSG00000128917.7_DLL4	DLL4	0.343571	2.28095	4.46397	1.45e-05	0.000328315	Significantly upregulated (Adj-P<0.01)
ENSG00000152818.18_UTRN	UTRN	0.294054	4.81487	4.51505	1.17e-05	0.000279271	Significantly upregulated (Adj-P<0.01)
ENSG00000058668.14_ATP2B4	ATP2B4	0.332082	5.02398	4.516	1.16e-05	0.000278737	Significantly upregulated (Adj-P<0.01)
ENSG00000130816.15_DNMT1	DNMT1	0.227933	3.17757	4.48585	1.32e-05	0.000307541	Significantly upregulated (Adj-P<0.01)
ENSG00000173210.19_ABLIM3	ABLIM3	0.304573	5.0373	4.51359	1.18e-05	0.000280305	Significantly upregulated (Adj-P<0.01)
ENSG00000147883.10_CDKN2B	CDKN2B	-0.516971	2.72555	-4.46207	1.46e-05	0.000330453	Significantly downregulated (Adj-P<0.01)
ENSG00000110107.8_PRPF19	PRPF19	-0.149174	4.89555	-4.51133	1.19e-05	0.00028256	Significantly downregulated (Adj-P<0.01)
ENSG00000188185.11_LINC00265	LINC00265	0.479616	-1.26896	4.40023	1.89e-05	0.000409773	Significantly upregulated (Adj-P<0.01)
ENSG00000174705.12_SH3PXD2B	SH3PXD2B	0.474735	1.59137	4.42871	1.68e-05	0.000370346	Significantly upregulated (Adj-P<0.01)
ENSG00000105538.9_RASIP1	RASIP1	0.323599	2.78485	4.4643	1.45e-05	0.000328315	Significantly upregulated (Adj-P<0.01)
ENSG00000163453.11_IGFBP7	IGFBP7	0.368238	5.97699	4.5004	1.24e-05	0.000293645	Significantly upregulated (Adj-P<0.01)
ENSG00000211460.11_TSN	TSN	-0.133058	5.61552	-4.50261	1.23e-05	0.000291808	Significantly downregulated (Adj-P<0.01)
ENSG00000083814.13_ZNF671	ZNF671	-0.228495	3.30276	-4.47292	1.39e-05	0.000318999	Significantly downregulated (Adj-P<0.01)
ENSG00000173218.14_VANGL1	VANGL1	0.359831	0.823157	4.39593	1.92e-05	0.000414243	Significantly upregulated (Adj-P<0.01)
ENSG00000159377.10_PSMB4	PSMB4	-0.17158	5.99572	-4.49804	1.25e-05	0.000296124	Significantly downregulated (Adj-P<0.01)
ENSG00000100307.12_CBX7	CBX7	-0.203718	6.58355	-4.49452	1.27e-05	0.000299198	Significantly downregulated (Adj-P<0.01)
ENSG00000170921.15_TANC2	TANC2	0.326131	2.22466	4.43779	1.61e-05	0.000359489	Significantly upregulated (Adj-P<0.01)
ENSG00000126878.12_AIF1L	AIF1L	0.340961	3.57721	4.47996	1.35e-05	0.00031278	Significantly upregulated (Adj-P<0.01)
ENSG00000203879.11_GDI1	GDI1	-0.141396	5.19841	-4.49667	1.26e-05	0.000297398	Significantly downregulated (Adj-P<0.01)
ENSG00000185559.14_DLK1	DLK1	0.642307	3.49263	4.48202	1.34e-05	0.000311499	Significantly upregulated (Adj-P<0.01)
ENSG00000129347.19_KRI1	KRI1	-0.200445	4.21325	-4.48751	1.31e-05	0.000305854	Significantly downregulated (Adj-P<0.01)
ENSG00000136636.12_KCTD3	KCTD3	0.2002	4.10923	4.48547	1.32e-05	0.000307569	Significantly upregulated (Adj-P<0.01)
ENSG00000143515.16_ATP8B2	ATP8B2	0.372052	2.06694	4.42862	1.68e-05	0.000370346	Significantly upregulated (Adj-P<0.01)
ENSG00000053747.16_LAMA3	LAMA3	0.449243	1.78467	4.41857	1.75e-05	0.000383448	Significantly upregulated (Adj-P<0.01)
ENSG00000087274.16_ADD1	ADD1	-0.116084	7.37603	-4.47971	1.35e-05	0.00031278	Significantly downregulated (Adj-P<0.01)
ENSG00000112562.18_SMOC2	SMOC2	0.4135	5.38149	4.48863	1.31e-05	0.000304933	Significantly upregulated (Adj-P<0.01)
ENSG00000117751.17_PPP1R8	PPP1R8	-0.109907	3.99105	-4.47569	1.38e-05	0.000316393	Significantly downregulated (Adj-P<0.01)
ENSG00000065308.4_TRAM2	TRAM2	0.280469	2.39392	4.43092	1.66e-05	0.000368371	Significantly upregulated (Adj-P<0.01)
ENSG00000176273.14_SLC35G1	SLC35G1	0.365443	0.872101	4.38335	2.02e-05	0.000431048	Significantly upregulated (Adj-P<0.01)
ENSG00000142173.14_COL6A2	COL6A2	0.43493	6.795	4.47637	1.37e-05	0.000316267	Significantly upregulated (Adj-P<0.01)
ENSG00000227496.1_AC099066.2	AC099066.2	-1.07454	1.69055	-4.3909	1.96e-05	0.000420076	Significantly downregulated (Adj-P<0.01)
ENSG00000274425.1_AC114271.1	AC114271.1	0.729117	-1.16232	4.36956	2.14e-05	0.000450771	Significantly upregulated (Adj-P<0.01)
ENSG00000164022.16_AIMP1	AIMP1	-0.143368	5.11743	-4.47979	1.35e-05	0.00031278	Significantly downregulated (Adj-P<0.01)
ENSG00000005108.15_THSD7A	THSD7A	0.522351	-0.702483	4.35873	2.24e-05	0.000464817	Significantly upregulated (Adj-P<0.01)
ENSG00000198554.11_WDHD1	WDHD1	0.364225	0.255588	4.35946	2.23e-05	0.000464817	Significantly upregulated (Adj-P<0.01)
ENSG00000120699.12_EXOSC8	EXOSC8	-0.190132	3.84642	-4.46083	1.47e-05	0.000331699	Significantly downregulated (Adj-P<0.01)
ENSG00000185585.19_OLFML2A	OLFML2A	0.373168	3.23121	4.45042	1.53e-05	0.000343967	Significantly upregulated (Adj-P<0.01)
ENSG00000013016.15_EHD3	EHD3	0.420406	0.684647	4.366	2.17e-05	0.0004556	Significantly upregulated (Adj-P<0.01)
ENSG00000129474.15_AJUBA	AJUBA	0.462432	0.320878	4.35885	2.24e-05	0.000464817	Significantly upregulated (Adj-P<0.01)
ENSG00000151500.14_THYN1	THYN1	-0.198805	3.02309	-4.43649	1.62e-05	0.00036094	Significantly downregulated (Adj-P<0.01)
ENSG00000146963.17_LUC7L2	LUC7L2	-0.140883	6.34432	-4.46451	1.44e-05	0.000328315	Significantly downregulated (Adj-P<0.01)
ENSG00000188529.14_SRSF10	SRSF10	-0.216063	5.60738	-4.4661	1.43e-05	0.00032729	Significantly downregulated (Adj-P<0.01)
ENSG00000089057.14_SLC23A2	SLC23A2	0.243577	2.60099	4.41715	1.76e-05	0.000385176	Significantly upregulated (Adj-P<0.01)
ENSG00000167552.13_TUBA1A	TUBA1A	0.401858	4.14007	4.45832	1.48e-05	0.000334721	Significantly upregulated (Adj-P<0.01)
ENSG00000083857.13_FAT1	FAT1	0.451526	2.00162	4.39722	1.91e-05	0.000412615	Significantly upregulated (Adj-P<0.01)
ENSG00000103061.12_SLC7A6OS	SLC7A6OS	-0.242771	4.25833	-4.45445	1.51e-05	0.000339203	Significantly downregulated (Adj-P<0.01)
ENSG00000164736.5_SOX17	SOX17	0.430343	0.856075	4.35856	2.24e-05	0.000464817	Significantly upregulated (Adj-P<0.01)
ENSG00000101986.11_ABCD1	ABCD1	0.261409	4.03619	4.45081	1.53e-05	0.000343905	Significantly upregulated (Adj-P<0.01)
ENSG00000164683.16_HEY1	HEY1	0.40807	2.18413	4.39481	1.93e-05	0.000415029	Significantly upregulated (Adj-P<0.01)
ENSG00000170917.13_NUDT6	NUDT6	0.256861	2.28604	4.40021	1.89e-05	0.000409773	Significantly upregulated (Adj-P<0.01)
ENSG00000120992.17_LYPLA1	LYPLA1	0.240714	5.29131	4.45545	1.5e-05	0.000338276	Significantly upregulated (Adj-P<0.01)
ENSG00000074181.8_NOTCH3	NOTCH3	0.342634	5.85747	4.44986	1.54e-05	0.00034426	Significantly upregulated (Adj-P<0.01)
ENSG00000092531.9_SNAP23	SNAP23	-0.17696	4.91108	-4.44953	1.54e-05	0.00034426	Significantly downregulated (Adj-P<0.01)
ENSG00000158859.9_ADAMTS4	ADAMTS4	0.525581	-0.713596	4.32524	2.57e-05	0.000519867	Significantly upregulated (Adj-P<0.01)
ENSG00000137124.7_ALDH1B1	ALDH1B1	0.368577	5.50675	4.4488	1.54e-05	0.000344827	Significantly upregulated (Adj-P<0.01)
ENSG00000234585.6_CCT6P3	CCT6P3	-0.252661	1.78734	-4.36647	2.17e-05	0.000455341	Significantly downregulated (Adj-P<0.01)
ENSG00000141736.13_ERBB2	ERBB2	-0.19381	5.04878	-4.44205	1.59e-05	0.000354168	Significantly downregulated (Adj-P<0.01)
ENSG00000020181.17_ADGRA2	ADGRA2	0.370077	3.4931	4.42456	1.71e-05	0.000375587	Significantly upregulated (Adj-P<0.01)
ENSG00000055483.19_USP36	USP36	-0.163169	4.7311	-4.43869	1.61e-05	0.000358665	Significantly downregulated (Adj-P<0.01)
ENSG00000165323.15_FAT3	FAT3	0.720641	-1.49926	4.33418	2.48e-05	0.000503771	Significantly upregulated (Adj-P<0.01)
ENSG00000135452.9_TSPAN31	TSPAN31	-0.140078	3.6499	-4.41671	1.76e-05	0.00038535	Significantly downregulated (Adj-P<0.01)
ENSG00000142192.20_APP	APP	0.271044	6.03896	4.43455	1.64e-05	0.000363357	Significantly upregulated (Adj-P<0.01)
ENSG00000175899.14_A2M	A2M	0.336138	7.12809	4.42492	1.7e-05	0.00037555	Significantly upregulated (Adj-P<0.01)
ENSG00000277969.1_AC006449.6	AC006449.6	0.341312	1.41623	4.34456	2.37e-05	0.000487829	Significantly upregulated (Adj-P<0.01)
ENSG00000129911.8_KLF16	KLF16	0.447634	0.237735	4.31787	2.65e-05	0.000531653	Significantly upregulated (Adj-P<0.01)
ENSG00000132561.13_MATN2	MATN2	0.52885	2.14505	4.37234	2.12e-05	0.000446834	Significantly upregulated (Adj-P<0.01)
ENSG00000177156.10_TALDO1	TALDO1	-0.183122	5.14621	-4.4298	1.67e-05	0.000369559	Significantly downregulated (Adj-P<0.01)
ENSG00000213762.11_ZNF134	ZNF134	-0.228943	3.44882	-4.39989	1.89e-05	0.000409773	Significantly downregulated (Adj-P<0.01)
ENSG00000260793.2_AC003102.1	AC003102.1	0.443428	-0.138856	4.30136	2.83e-05	0.000560827	Significantly upregulated (Adj-P<0.01)
ENSG00000189077.10_TMEM120A	TMEM120A	-0.394737	4.91426	-4.4241	1.71e-05	0.000375785	Significantly downregulated (Adj-P<0.01)
ENSG00000070269.13_TMEM260	TMEM260	-0.219146	2.11086	-4.35267	2.3e-05	0.00047433	Significantly downregulated (Adj-P<0.01)
ENSG00000154721.14_JAM2	JAM2	0.373631	3.11725	4.38981	1.97e-05	0.000420885	Significantly upregulated (Adj-P<0.01)
ENSG00000241935.8_HOGA1	HOGA1	-0.685943	0.54631	-4.30613	2.78e-05	0.000552817	Significantly downregulated (Adj-P<0.01)
ENSG00000148672.8_GLUD1	GLUD1	0.152685	5.46544	4.42019	1.74e-05	0.000381414	Significantly upregulated (Adj-P<0.01)
ENSG00000169612.3_RAMAC	RAMAC	-0.179289	3.65963	-4.398	1.9e-05	0.000411847	Significantly downregulated (Adj-P<0.01)
ENSG00000164687.10_FABP5	FABP5	0.309296	3.80719	4.40416	1.86e-05	0.000404817	Significantly upregulated (Adj-P<0.01)
ENSG00000008311.14_AASS	AASS	-0.42342	3.0338	-4.37555	2.09e-05	0.000442148	Significantly downregulated (Adj-P<0.01)
ENSG00000157045.8_NTAN1	NTAN1	0.231909	3.56225	4.39921	1.9e-05	0.000410358	Significantly upregulated (Adj-P<0.01)
ENSG00000121281.12_ADCY7	ADCY7	0.515197	1.65394	4.33761	2.44e-05	0.000499323	Significantly upregulated (Adj-P<0.01)
ENSG00000102144.14_PGK1	PGK1	0.258797	8.22495	4.38858	1.98e-05	0.000422402	Significantly upregulated (Adj-P<0.01)
ENSG00000110076.18_NRXN2	NRXN2	0.406053	0.479393	4.30018	2.85e-05	0.000562112	Significantly upregulated (Adj-P<0.01)
ENSG00000255772.5_LINC01479	LINC01479	-0.775639	-1.47657	-4.2956	2.9e-05	0.000571963	Significantly downregulated (Adj-P<0.01)
ENSG00000180155.19_LYNX1	LYNX1	0.379546	2.58392	4.36145	2.22e-05	0.000461752	Significantly upregulated (Adj-P<0.01)
ENSG00000163516.13_ANKZF1	ANKZF1	-0.166418	4.87047	-4.40436	1.86e-05	0.000404817	Significantly downregulated (Adj-P<0.01)
ENSG00000130787.13_HIP1R	HIP1R	0.309767	2.74003	4.36484	2.18e-05	0.000456577	Significantly upregulated (Adj-P<0.01)
ENSG00000104221.12_BRF2	BRF2	-0.177574	3.99197	-4.39259	1.95e-05	0.000418292	Significantly downregulated (Adj-P<0.01)
ENSG00000115053.15_NCL	NCL	-0.117613	7.805	-4.38978	1.97e-05	0.000420885	Significantly downregulated (Adj-P<0.01)
ENSG00000071282.11_LMCD1	LMCD1	-0.280468	8.13577	-4.38179	2.04e-05	0.000432657	Significantly downregulated (Adj-P<0.01)
ENSG00000130307.11_USHBP1	USHBP1	0.29933	2.531	4.34745	2.35e-05	0.000483335	Significantly upregulated (Adj-P<0.01)
ENSG00000174804.3_FZD4	FZD4	0.283322	5.63536	4.39497	1.93e-05	0.000415029	Significantly upregulated (Adj-P<0.01)
ENSG00000157985.18_AGAP1	AGAP1	0.175838	4.63554	4.39177	1.95e-05	0.000419149	Significantly upregulated (Adj-P<0.01)
ENSG00000128283.6_CDC42EP1	CDC42EP1	0.324821	2.18791	4.33308	2.49e-05	0.000504732	Significantly upregulated (Adj-P<0.01)
ENSG00000108387.14_SEPT4	SEPT4	0.27499	2.01082	4.31997	2.63e-05	0.000527789	Significantly upregulated (Adj-P<0.01)
ENSG00000187688.14_TRPV2	TRPV2	0.388743	1.01952	4.28843	2.99e-05	0.000584498	Significantly upregulated (Adj-P<0.01)
ENSG00000214456.8_PLIN5	PLIN5	-0.49271	6.7385	-4.38104	2.04e-05	0.000433418	Significantly downregulated (Adj-P<0.01)
ENSG00000092199.17_HNRNPC	HNRNPC	-0.124176	6.82192	-4.37888	2.06e-05	0.000436707	Significantly downregulated (Adj-P<0.01)
ENSG00000173638.18_SLC19A1	SLC19A1	0.349129	0.996706	4.28637	3.01e-05	0.000588087	Significantly upregulated (Adj-P<0.01)
ENSG00000101161.7_PRPF6	PRPF6	-0.15502	5.90126	-4.38246	2.03e-05	0.000432047	Significantly downregulated (Adj-P<0.01)
ENSG00000088367.21_EPB41L1	EPB41L1	0.291349	2.88116	4.34343	2.39e-05	0.000489463	Significantly upregulated (Adj-P<0.01)
ENSG00000230537.1_AL158071.2	AL158071.2	-0.587252	-1.1303	-4.25963	3.36e-05	0.000642519	Significantly downregulated (Adj-P<0.01)
ENSG00000146112.11_PPP1R18	PPP1R18	0.358344	2.32399	4.32845	2.54e-05	0.000513737	Significantly upregulated (Adj-P<0.01)
ENSG00000102743.14_SLC25A15	SLC25A15	0.364733	1.17835	4.27953	3.1e-05	0.00060226	Significantly upregulated (Adj-P<0.01)
ENSG00000128052.9_KDR	KDR	0.497362	2.95048	4.33971	2.42e-05	0.000496329	Significantly upregulated (Adj-P<0.01)
ENSG00000076555.15_ACACB	ACACB	0.247842	7.23754	4.36523	2.18e-05	0.000456437	Significantly upregulated (Adj-P<0.01)
ENSG00000031698.12_SARS	SARS	-0.117669	5.54332	-4.37387	2.1e-05	0.000444618	Significantly downregulated (Adj-P<0.01)
ENSG00000158941.16_CCAR2	CCAR2	-0.126404	5.41887	-4.37124	2.13e-05	0.000448274	Significantly downregulated (Adj-P<0.01)
ENSG00000169418.9_NPR1	NPR1	0.384728	2.89195	4.33427	2.48e-05	0.000503771	Significantly upregulated (Adj-P<0.01)
ENSG00000247121.6_AC009126.1	AC009126.1	0.333344	0.437563	4.25204	3.46e-05	0.000654568	Significantly upregulated (Adj-P<0.01)
ENSG00000091409.14_ITGA6	ITGA6	0.352454	5.03504	4.36817	2.15e-05	0.000452763	Significantly upregulated (Adj-P<0.01)
ENSG00000204131.9_NHSL2	NHSL2	0.448675	1.47834	4.27748	3.12e-05	0.000605812	Significantly upregulated (Adj-P<0.01)
ENSG00000046889.18_PREX2	PREX2	0.355563	2.95862	4.32242	2.6e-05	0.000524548	Significantly upregulated (Adj-P<0.01)
ENSG00000211455.7_STK38L	STK38L	0.279832	3.4277	4.33804	2.44e-05	0.000499099	Significantly upregulated (Adj-P<0.01)
ENSG00000164609.9_SLU7	SLU7	-0.144835	5.2527	-4.36148	2.21e-05	0.000461752	Significantly downregulated (Adj-P<0.01)
ENSG00000211450.9_SELENOH	SELENOH	-0.22896	4.41166	-4.3563	2.26e-05	0.000467911	Significantly downregulated (Adj-P<0.01)
ENSG00000143363.16_PRUNE1	PRUNE1	-0.147058	4.68852	-4.35821	2.24e-05	0.000464876	Significantly downregulated (Adj-P<0.01)
ENSG00000120784.16_ZFP30	ZFP30	0.225457	2.21888	4.29191	2.94e-05	0.000578449	Significantly upregulated (Adj-P<0.01)
ENSG00000250067.11_YJEFN3	YJEFN3	-0.373683	2.68307	-4.31017	2.73e-05	0.000545151	Significantly downregulated (Adj-P<0.01)
ENSG00000119630.13_PGF	PGF	0.465931	1.16762	4.26281	3.31e-05	0.000635084	Significantly upregulated (Adj-P<0.01)
ENSG00000171502.14_COL24A1	COL24A1	0.637157	0.953789	4.24778	3.52e-05	0.000664313	Significantly upregulated (Adj-P<0.01)
ENSG00000110400.10_NECTIN1	NECTIN1	0.411343	0.121587	4.22743	3.82e-05	0.0007081	Significantly upregulated (Adj-P<0.01)
ENSG00000107551.20_RASSF4	RASSF4	0.264002	4.70004	4.35033	2.32e-05	0.000478285	Significantly upregulated (Adj-P<0.01)
ENSG00000006042.11_TMEM98	TMEM98	0.397322	0.726717	4.24399	3.58e-05	0.000672959	Significantly upregulated (Adj-P<0.01)
ENSG00000198720.12_ANKRD13B	ANKRD13B	0.262404	1.90895	4.27811	3.11e-05	0.000605001	Significantly upregulated (Adj-P<0.01)
ENSG00000039560.13_RAI14	RAI14	0.476728	0.421364	4.22753	3.82e-05	0.0007081	Significantly upregulated (Adj-P<0.01)
ENSG00000174059.16_CD34	CD34	0.287116	5.31333	4.34476	2.37e-05	0.000487829	Significantly upregulated (Adj-P<0.01)
ENSG00000186318.16_BACE1	BACE1	0.171956	4.28874	4.33613	2.46e-05	0.000501708	Significantly upregulated (Adj-P<0.01)
ENSG00000116991.10_SIPA1L2	SIPA1L2	0.46192	3.214	4.31285	2.7e-05	0.000539911	Significantly upregulated (Adj-P<0.01)
ENSG00000109790.16_KLHL5	KLHL5	0.306725	2.66696	4.28925	2.98e-05	0.000583286	Significantly upregulated (Adj-P<0.01)
ENSG00000133116.7_KL	KL	0.424118	0.273706	4.20941	4.11e-05	0.000744857	Significantly upregulated (Adj-P<0.01)
ENSG00000183431.11_SF3A3	SF3A3	0.414026	5.38355	4.33518	2.47e-05	0.000503019	Significantly upregulated (Adj-P<0.01)
ENSG00000103335.22_PIEZO1	PIEZO1	0.382776	3.7061	4.32056	2.62e-05	0.000527191	Significantly upregulated (Adj-P<0.01)
ENSG00000134759.13_ELP2	ELP2	-0.181753	5.4684	-4.33352	2.48e-05	0.000504489	Significantly downregulated (Adj-P<0.01)
ENSG00000048342.15_CC2D2A	CC2D2A	0.336034	1.33095	4.23604	3.69e-05	0.000691555	Significantly upregulated (Adj-P<0.01)
ENSG00000135905.19_DOCK10	DOCK10	0.567691	-0.135373	4.2001	4.27e-05	0.000766984	Significantly upregulated (Adj-P<0.01)
ENSG00000114988.11_LMAN2L	LMAN2L	-0.179498	3.75973	-4.31364	2.69e-05	0.00053953	Significantly downregulated (Adj-P<0.01)
ENSG00000105053.10_VRK3	VRK3	-0.1421	3.45803	-4.30369	2.81e-05	0.000556936	Significantly downregulated (Adj-P<0.01)
ENSG00000067334.13_DNTTIP2	DNTTIP2	-0.152406	4.82583	-4.32314	2.59e-05	0.000523663	Significantly downregulated (Adj-P<0.01)
ENSG00000136856.17_SLC2A8	SLC2A8	-0.257125	3.71174	-4.30388	2.8e-05	0.000556936	Significantly downregulated (Adj-P<0.01)
ENSG00000143401.14_ANP32E	ANP32E	-0.17996	5.14559	-4.3212	2.61e-05	0.000526492	Significantly downregulated (Adj-P<0.01)
ENSG00000077009.13_NMRK2	NMRK2	0.889468	6.19808	4.31331	2.7e-05	0.00053957	Significantly upregulated (Adj-P<0.01)
ENSG00000148935.11_GAS2	GAS2	-0.322246	2.27936	-4.25156	3.47e-05	0.000655042	Significantly downregulated (Adj-P<0.01)
ENSG00000100242.15_SUN2	SUN2	-0.251805	6.22264	-4.31447	2.69e-05	0.000538408	Significantly downregulated (Adj-P<0.01)
ENSG00000169247.12_SH3TC2	SH3TC2	0.500825	-0.3218	4.18329	4.56e-05	0.000812867	Significantly upregulated (Adj-P<0.01)
ENSG00000173812.10_EIF1	EIF1	-0.147434	9.17281	-4.28298	3.05e-05	0.000595373	Significantly downregulated (Adj-P<0.01)
ENSG00000235162.8_C12orf75	C12orf75	-0.76865	4.78049	-4.30618	2.78e-05	0.000552817	Significantly downregulated (Adj-P<0.01)
ENSG00000166275.15_BORCS7	BORCS7	-0.16545	4.14547	-4.30042	2.84e-05	0.000562112	Significantly downregulated (Adj-P<0.01)
ENSG00000139679.15_LPAR6	LPAR6	0.37412	2.26326	4.24291	3.59e-05	0.000675078	Significantly upregulated (Adj-P<0.01)
ENSG00000149564.11_ESAM	ESAM	0.271856	3.89721	4.29529	2.9e-05	0.000571981	Significantly upregulated (Adj-P<0.01)
ENSG00000167617.2_CDC42EP5	CDC42EP5	0.445571	-0.180719	4.18103	4.6e-05	0.00081746	Significantly upregulated (Adj-P<0.01)
ENSG00000122707.11_RECK	RECK	0.374732	2.01719	4.22753	3.82e-05	0.0007081	Significantly upregulated (Adj-P<0.01)
ENSG00000010404.17_IDS	IDS	-0.140583	5.71472	-4.30214	2.82e-05	0.000559741	Significantly downregulated (Adj-P<0.01)
ENSG00000149499.11_EML3	EML3	0.268357	2.84799	4.26431	3.29e-05	0.000632005	Significantly upregulated (Adj-P<0.01)
ENSG00000149179.13_C11orf49	C11orf49	0.244314	1.66706	4.21666	3.99e-05	0.000729371	Significantly upregulated (Adj-P<0.01)
ENSG00000153574.8_RPIA	RPIA	-0.151225	3.99864	-4.28631	3.01e-05	0.000588087	Significantly downregulated (Adj-P<0.01)
ENSG00000149182.14_ARFGAP2	ARFGAP2	-0.18021	6.15538	-4.29385	2.92e-05	0.000574617	Significantly downregulated (Adj-P<0.01)
ENSG00000224940.8_PRRT4	PRRT4	0.619077	1.21021	4.2091	4.11e-05	0.000744923	Significantly upregulated (Adj-P<0.01)
ENSG00000221817.9_PPP3CB-AS1	PPP3CB-AS1	-0.384857	2.61363	-4.23472	3.71e-05	0.00069413	Significantly downregulated (Adj-P<0.01)
ENSG00000153246.12_PLA2R1	PLA2R1	0.49235	0.704119	4.17754	4.67e-05	0.000825205	Significantly upregulated (Adj-P<0.01)
ENSG00000135447.16_PPP1R1A	PPP1R1A	-0.260114	8.37733	-4.26974	3.22e-05	0.000621287	Significantly downregulated (Adj-P<0.01)
ENSG00000244300.2_GATA2-AS1	GATA2-AS1	0.520839	-1.20092	4.16023	5e-05	0.000871359	Significantly upregulated (Adj-P<0.01)
ENSG00000011028.13_MRC2	MRC2	0.470497	4.62519	4.28991	2.97e-05	0.000582452	Significantly upregulated (Adj-P<0.01)
ENSG00000104529.17_EEF1D	EEF1D	-0.204713	7.98281	-4.27167	3.2e-05	0.000617191	Significantly downregulated (Adj-P<0.01)
ENSG00000128266.8_GNAZ	GNAZ	0.349393	0.356857	4.16442	4.92e-05	0.00086077	Significantly upregulated (Adj-P<0.01)
ENSG00000110063.9_DCPS	DCPS	-0.199409	2.6671	-4.23872	3.65e-05	0.000684937	Significantly downregulated (Adj-P<0.01)
ENSG00000146674.14_IGFBP3	IGFBP3	0.479317	3.1147	4.25432	3.43e-05	0.000650909	Significantly upregulated (Adj-P<0.01)
ENSG00000175564.12_UCP3	UCP3	0.478126	6.95936	4.27517	3.15e-05	0.000610765	Significantly upregulated (Adj-P<0.01)
ENSG00000153902.13_LGI4	LGI4	-0.275307	4.60837	-4.28043	3.09e-05	0.000600828	Significantly downregulated (Adj-P<0.01)
ENSG00000197183.14_NOL4L	NOL4L	0.376403	1.05311	4.17254	4.76e-05	0.000838042	Significantly upregulated (Adj-P<0.01)
ENSG00000007171.17_NOS2	NOS2	0.590755	-0.716622	4.14111	5.4e-05	0.000923688	Significantly upregulated (Adj-P<0.01)
ENSG00000221926.12_TRIM16	TRIM16	0.234903	3.46551	4.25589	3.41e-05	0.000649138	Significantly upregulated (Adj-P<0.01)
ENSG00000134297.6_PLEKHA8P1	PLEKHA8P1	0.437723	-0.271892	4.13959	5.43e-05	0.000928261	Significantly upregulated (Adj-P<0.01)
ENSG00000119321.8_FKBP15	FKBP15	-0.120322	4.28028	-4.26881	3.23e-05	0.000622106	Significantly downregulated (Adj-P<0.01)
ENSG00000142453.11_CARM1	CARM1	-0.174871	6.72044	-4.26943	3.23e-05	0.000621303	Significantly downregulated (Adj-P<0.01)
ENSG00000182853.11_VMO1	VMO1	1.52022	-2.22655	4.13862	5.45e-05	0.000929798	Significantly upregulated (Adj-P<0.01)
ENSG00000150401.14_DCUN1D2	DCUN1D2	-0.165606	6.36301	-4.27194	3.19e-05	0.000617191	Significantly downregulated (Adj-P<0.01)
ENSG00000174243.9_DDX23	DDX23	-0.151806	5.53682	-4.27345	3.17e-05	0.000614271	Significantly downregulated (Adj-P<0.01)
ENSG00000100478.14_AP4S1	AP4S1	-0.167583	2.95585	-4.22953	3.79e-05	0.000705732	Significantly downregulated (Adj-P<0.01)
ENSG00000213694.4_S1PR3	S1PR3	0.465872	1.08838	4.16608	4.89e-05	0.000857263	Significantly upregulated (Adj-P<0.01)
ENSG00000167733.13_HSD11B1L	HSD11B1L	0.296548	2.35351	4.21974	3.94e-05	0.00072208	Significantly upregulated (Adj-P<0.01)
ENSG00000137404.14_NRM	NRM	0.32681	0.114968	4.14217	5.37e-05	0.000920831	Significantly upregulated (Adj-P<0.01)
ENSG00000011638.10_TMEM159	TMEM159	-0.308629	6.39449	-4.26769	3.25e-05	0.000624172	Significantly downregulated (Adj-P<0.01)
ENSG00000113368.11_LMNB1	LMNB1	0.440991	-0.233497	4.13096	5.62e-05	0.000951857	Significantly upregulated (Adj-P<0.01)
ENSG00000187741.14_FANCA	FANCA	0.709657	-1.80042	4.13761	5.47e-05	0.000932529	Significantly upregulated (Adj-P<0.01)
ENSG00000184489.11_PTP4A3	PTP4A3	-0.260806	8.69263	-4.24046	3.63e-05	0.000680985	Significantly downregulated (Adj-P<0.01)
ENSG00000263465.4_SRSF8	SRSF8	-0.182969	4.16474	-4.25559	3.41e-05	0.000649138	Significantly downregulated (Adj-P<0.01)
ENSG00000112599.8_GUCA1B	GUCA1B	-0.461818	-0.487415	-4.12302	5.8e-05	0.000974187	Significantly downregulated (Adj-P<0.01)
ENSG00000156218.12_ADAMTSL3	ADAMTSL3	0.440722	2.14443	4.19114	4.42e-05	0.000790454	Significantly upregulated (Adj-P<0.01)
ENSG00000170323.8_FABP4	FABP4	0.511484	4.92765	4.25907	3.36e-05	0.000643098	Significantly upregulated (Adj-P<0.01)
ENSG00000132680.10_KHDC4	KHDC4	-0.163276	4.98066	-4.2588	3.37e-05	0.000643098	Significantly downregulated (Adj-P<0.01)
ENSG00000165806.19_CASP7	CASP7	0.23467	3.12095	4.22566	3.85e-05	0.000711737	Significantly upregulated (Adj-P<0.01)
ENSG00000107937.18_GTPBP4	GTPBP4	-0.12599	4.86117	-4.25732	3.39e-05	0.000646184	Significantly downregulated (Adj-P<0.01)
ENSG00000153721.18_CNKSR3	CNKSR3	0.31363	1.02262	4.15006	5.21e-05	0.000900311	Significantly upregulated (Adj-P<0.01)
ENSG00000204070.9_SYS1	SYS1	-0.160736	3.48629	-4.23236	3.75e-05	0.000699403	Significantly downregulated (Adj-P<0.01)
ENSG00000279453.1_Z99129.4	Z99129.4	-0.259593	3.33686	-4.22148	3.91e-05	0.000718718	Significantly downregulated (Adj-P<0.01)
ENSG00000146072.6_TNFRSF21	TNFRSF21	0.316115	1.92745	4.17893	4.64e-05	0.000821551	Significantly upregulated (Adj-P<0.01)
ENSG00000161526.14_SAP30BP	SAP30BP	-0.139095	4.52825	-4.25216	3.46e-05	0.000654568	Significantly downregulated (Adj-P<0.01)
ENSG00000169062.14_UPF3A	UPF3A	-0.141848	5.21063	-4.25507	3.42e-05	0.000649714	Significantly downregulated (Adj-P<0.01)
ENSG00000171385.9_KCND3	KCND3	-0.449774	3.02053	-4.21072	4.09e-05	0.000742652	Significantly downregulated (Adj-P<0.01)
ENSG00000006712.14_PAF1	PAF1	-0.13758	4.94005	-4.25296	3.45e-05	0.000653697	Significantly downregulated (Adj-P<0.01)
ENSG00000105854.12_PON2	PON2	0.240224	2.92468	4.21241	4.06e-05	0.000740231	Significantly upregulated (Adj-P<0.01)
ENSG00000140471.16_LINS1	LINS1	-0.224362	2.16768	-4.17582	4.7e-05	0.000829946	Significantly downregulated (Adj-P<0.01)
ENSG00000198208.11_RPS6KL1	RPS6KL1	-0.313072	3.27862	-4.22196	3.91e-05	0.000718192	Significantly downregulated (Adj-P<0.01)
ENSG00000061938.17_TNK2	TNK2	-0.304286	7.37874	-4.23453	3.71e-05	0.00069413	Significantly downregulated (Adj-P<0.01)
ENSG00000198719.8_DLL1	DLL1	0.373444	1.17498	4.14742	5.26e-05	0.000906776	Significantly upregulated (Adj-P<0.01)
ENSG00000173890.16_GPR160	GPR160	0.543635	-0.807129	4.10562	6.21e-05	0.0010284	Significantly upregulated (Adj-P<0.01)
ENSG00000177990.11_DPY19L2	DPY19L2	0.534064	-0.262447	4.10526	6.22e-05	0.0010284	Significantly upregulated (Adj-P<0.01)
ENSG00000127837.9_AAMP	AAMP	-0.157961	5.35501	-4.24416	3.57e-05	0.000672959	Significantly downregulated (Adj-P<0.01)
ENSG00000160360.12_GPSM1	GPSM1	0.389616	0.569707	4.13054	5.63e-05	0.000951857	Significantly upregulated (Adj-P<0.01)
ENSG00000055118.14_KCNH2	KCNH2	0.617989	-0.848999	4.10056	6.33e-05	0.00103997	Significantly upregulated (Adj-P<0.01)
ENSG00000130713.15_EXOSC2	EXOSC2	-0.144888	3.47582	-4.21717	3.98e-05	0.000728719	Significantly downregulated (Adj-P<0.01)
ENSG00000125414.18_MYH2	MYH2	0.483191	14.3478	4.15288	5.15e-05	0.000893207	Significantly upregulated (Adj-P<0.01)
ENSG00000198108.3_CHSY3	CHSY3	0.529447	-0.404528	4.09681	6.43e-05	0.00105103	Significantly upregulated (Adj-P<0.01)
ENSG00000147113.16_CXorf36	CXorf36	0.322906	3.96315	4.22723	3.83e-05	0.0007081	Significantly upregulated (Adj-P<0.01)
ENSG00000167972.13_ABCA3	ABCA3	0.212037	3.49216	4.21203	4.07e-05	0.000740486	Significantly upregulated (Adj-P<0.01)
ENSG00000142156.14_COL6A1	COL6A1	0.34198	6.74731	4.22428	3.87e-05	0.000714292	Significantly upregulated (Adj-P<0.01)
ENSG00000166265.11_CYYR1	CYYR1	0.320364	3.10502	4.19489	4.36e-05	0.000780453	Significantly upregulated (Adj-P<0.01)
ENSG00000179922.5_ZNF784	ZNF784	-0.275215	4.97576	-4.23076	3.77e-05	0.000703081	Significantly downregulated (Adj-P<0.01)
ENSG00000171408.13_PDE7B	PDE7B	0.226911	2.7919	4.183	4.57e-05	0.000812884	Significantly upregulated (Adj-P<0.01)
ENSG00000143742.12_SRP9	SRP9	-0.124799	7.0187	-4.22245	3.9e-05	0.000717621	Significantly downregulated (Adj-P<0.01)
ENSG00000198885.9_ITPRIPL1	ITPRIPL1	0.458064	-0.667451	4.0858	6.71e-05	0.00108282	Significantly upregulated (Adj-P<0.01)
ENSG00000205542.10_TMSB4X	TMSB4X	0.336357	6.54699	4.22308	3.89e-05	0.000716626	Significantly upregulated (Adj-P<0.01)
ENSG00000136819.15_C9orf78	C9orf78	-0.129821	4.8953	-4.22816	3.81e-05	0.0007081	Significantly downregulated (Adj-P<0.01)
ENSG00000120656.11_TAF12	TAF12	-0.1709	2.83339	-4.18257	4.58e-05	0.000813372	Significantly downregulated (Adj-P<0.01)
ENSG00000135362.13_PRR5L	PRR5L	0.624563	-0.99666	4.08584	6.71e-05	0.00108282	Significantly upregulated (Adj-P<0.01)
ENSG00000166033.12_HTRA1	HTRA1	0.391967	3.40546	4.20425	4.2e-05	0.00075692	Significantly upregulated (Adj-P<0.01)
ENSG00000113575.9_PPP2CA	PPP2CA	-0.193321	6.17641	-4.22419	3.87e-05	0.000714292	Significantly downregulated (Adj-P<0.01)
ENSG00000253636.1_AC022893.1	AC022893.1	-0.328688	0.716567	-4.10186	6.3e-05	0.00103884	Significantly downregulated (Adj-P<0.01)
ENSG00000280798.1_LINC00294	LINC00294	0.243742	1.62522	4.13438	5.54e-05	0.00094044	Significantly upregulated (Adj-P<0.01)
ENSG00000152779.13_SLC16A12	SLC16A12	0.421694	0.904107	4.10618	6.2e-05	0.00102795	Significantly upregulated (Adj-P<0.01)
ENSG00000123427.16_EEF1AKMT3	EEF1AKMT3	0.377342	0.0170003	4.08693	6.68e-05	0.00108026	Significantly upregulated (Adj-P<0.01)
ENSG00000256525.6_POLG2	POLG2	0.18476	2.01323	4.14709	5.27e-05	0.000906997	Significantly upregulated (Adj-P<0.01)
ENSG00000158710.14_TAGLN2	TAGLN2	0.313397	4.66992	4.22026	3.93e-05	0.000721429	Significantly upregulated (Adj-P<0.01)
ENSG00000149476.15_TKFC	TKFC	0.217067	3.0336	4.18815	4.47e-05	0.000798154	Significantly upregulated (Adj-P<0.01)
ENSG00000078098.13_FAP	FAP	0.456002	1.96896	4.14744	5.26e-05	0.000906776	Significantly upregulated (Adj-P<0.01)
ENSG00000092208.17_GEMIN2	GEMIN2	-0.206503	2.04531	-4.14367	5.34e-05	0.000917364	Significantly downregulated (Adj-P<0.01)
ENSG00000254539.1_AC239804.1	AC239804.1	-0.308057	3.01875	-4.18019	4.62e-05	0.00081928	Significantly downregulated (Adj-P<0.01)
ENSG00000150967.17_ABCB9	ABCB9	0.467063	-0.41635	4.07411	7.03e-05	0.00111757	Significantly upregulated (Adj-P<0.01)
ENSG00000151690.14_MFSD6	MFSD6	0.300677	2.3327	4.1487	5.24e-05	0.000904194	Significantly upregulated (Adj-P<0.01)
ENSG00000109436.7_TBC1D9	TBC1D9	0.433895	1.68421	4.12695	5.71e-05	0.000963315	Significantly upregulated (Adj-P<0.01)
ENSG00000110844.13_PRPF40B	PRPF40B	-0.148867	4.42354	-4.21016	4.1e-05	0.000743465	Significantly downregulated (Adj-P<0.01)
ENSG00000135643.4_KCNMB4	KCNMB4	0.333294	0.713644	4.09239	6.54e-05	0.00106611	Significantly upregulated (Adj-P<0.01)
ENSG00000101158.13_NELFCD	NELFCD	-0.149741	5.32538	-4.2124	4.06e-05	0.000740231	Significantly downregulated (Adj-P<0.01)
ENSG00000119865.8_CNRIP1	CNRIP1	0.260291	1.92481	4.13696	5.49e-05	0.00093392	Significantly upregulated (Adj-P<0.01)
ENSG00000132953.16_XPO4	XPO4	-0.558664	7.97621	-4.19569	4.34e-05	0.00077886	Significantly downregulated (Adj-P<0.01)
ENSG00000124207.16_CSE1L	CSE1L	-0.162857	5.50007	-4.21123	4.08e-05	0.000742008	Significantly downregulated (Adj-P<0.01)
ENSG00000170348.8_TMED10	TMED10	-0.157341	6.63151	-4.20517	4.18e-05	0.000755005	Significantly downregulated (Adj-P<0.01)
ENSG00000106511.5_MEOX2	MEOX2	0.363997	2.47065	4.15115	5.19e-05	0.000897409	Significantly upregulated (Adj-P<0.01)
ENSG00000211451.12_GNRHR2	GNRHR2	0.325382	0.155789	4.07645	6.96e-05	0.0011096	Significantly upregulated (Adj-P<0.01)
ENSG00000183751.14_TBL3	TBL3	-0.170514	4.40204	-4.20259	4.22e-05	0.000761109	Significantly downregulated (Adj-P<0.01)
ENSG00000143162.8_CREG1	CREG1	-0.162936	5.37906	-4.20542	4.18e-05	0.000755005	Significantly downregulated (Adj-P<0.01)
ENSG00000121900.18_TMEM54	TMEM54	-0.522406	0.665268	-4.08215	6.81e-05	0.00109059	Significantly downregulated (Adj-P<0.01)
ENSG00000025770.18_NCAPH2	NCAPH2	-0.196854	4.31602	-4.19855	4.29e-05	0.000770875	Significantly downregulated (Adj-P<0.01)
ENSG00000165533.18_TTC8	TTC8	0.348845	0.364834	4.07578	6.98e-05	0.00111137	Significantly upregulated (Adj-P<0.01)
ENSG00000163026.11_WDCP	WDCP	-0.162285	2.83237	-4.155	5.11e-05	0.000887694	Significantly downregulated (Adj-P<0.01)
ENSG00000154114.12_TBCEL	TBCEL	0.263837	2.84668	4.15638	5.08e-05	0.00088383	Significantly upregulated (Adj-P<0.01)
ENSG00000105974.11_CAV1	CAV1	0.311196	5.75703	4.20181	4.24e-05	0.000762618	Significantly upregulated (Adj-P<0.01)
ENSG00000117600.12_PLPPR4	PLPPR4	0.704273	-0.729341	4.05648	7.53e-05	0.00118261	Significantly upregulated (Adj-P<0.01)
ENSG00000180884.9_ZNF792	ZNF792	0.365347	0.301496	4.06962	7.15e-05	0.00113391	Significantly upregulated (Adj-P<0.01)
ENSG00000148832.15_PAOX	PAOX	0.283938	1.31026	4.10169	6.31e-05	0.00103884	Significantly upregulated (Adj-P<0.01)
ENSG00000166068.12_SPRED1	SPRED1	0.271705	2.53514	4.13578	5.51e-05	0.000936264	Significantly upregulated (Adj-P<0.01)
ENSG00000150977.10_RILPL2	RILPL2	0.297875	1.22214	4.09212	6.55e-05	0.00106614	Significantly upregulated (Adj-P<0.01)
ENSG00000220205.8_VAMP2	VAMP2	-0.145335	5.41378	-4.19313	4.39e-05	0.000785092	Significantly downregulated (Adj-P<0.01)
ENSG00000254087.7_LYN	LYN	0.585342	0.251771	4.05693	7.52e-05	0.00118205	Significantly upregulated (Adj-P<0.01)
ENSG00000010282.14_HHATL	HHATL	-0.22805	7.4894	-4.17938	4.63e-05	0.000821005	Significantly downregulated (Adj-P<0.01)
ENSG00000146242.8_TPBG	TPBG	0.378278	0.826809	4.07693	6.95e-05	0.00110956	Significantly upregulated (Adj-P<0.01)
ENSG00000130640.13_TUBGCP2	TUBGCP2	-0.12951	5.20043	-4.1886	4.47e-05	0.000797614	Significantly downregulated (Adj-P<0.01)
ENSG00000164099.3_PRSS12	PRSS12	0.810207	-1.62818	4.0472	7.81e-05	0.00121337	Significantly upregulated (Adj-P<0.01)
ENSG00000100311.16_PDGFB	PDGFB	0.254276	3.5857	4.16188	4.97e-05	0.000868541	Significantly upregulated (Adj-P<0.01)
ENSG00000261659.2_Z92544.2	Z92544.2	0.430843	-0.7696	4.03076	8.32e-05	0.00127235	Significantly upregulated (Adj-P<0.01)
ENSG00000159314.11_ARHGAP27	ARHGAP27	0.319382	2.25107	4.12097	5.84e-05	0.000981089	Significantly upregulated (Adj-P<0.01)
ENSG00000106537.7_TSPAN13	TSPAN13	0.355365	2.02792	4.10163	6.31e-05	0.00103884	Significantly upregulated (Adj-P<0.01)
ENSG00000162999.12_DUSP19	DUSP19	0.309866	1.61922	4.08294	6.79e-05	0.00108947	Significantly upregulated (Adj-P<0.01)
ENSG00000111432.4_FZD10	FZD10	0.554776	-0.877795	4.029	8.38e-05	0.00127272	Significantly upregulated (Adj-P<0.01)
ENSG00000157036.12_EXOG	EXOG	-0.253258	2.24538	-4.10456	6.23e-05	0.00103018	Significantly downregulated (Adj-P<0.01)
ENSG00000115484.14_CCT4	CCT4	-0.136864	6.02098	-4.17532	4.71e-05	0.000830673	Significantly downregulated (Adj-P<0.01)
ENSG00000111261.13_MANSC1	MANSC1	0.390701	0.628321	4.05124	7.68e-05	0.00120021	Significantly upregulated (Adj-P<0.01)
ENSG00000133884.9_DPF2	DPF2	-0.117778	4.71302	-4.17428	4.73e-05	0.000833165	Significantly downregulated (Adj-P<0.01)
ENSG00000181409.12_AATK	AATK	0.494265	-0.453745	4.03255	8.26e-05	0.00126811	Significantly upregulated (Adj-P<0.01)
ENSG00000114859.15_CLCN2	CLCN2	0.280818	0.390121	4.04717	7.81e-05	0.00121337	Significantly upregulated (Adj-P<0.01)
ENSG00000113319.12_RASGRF2	RASGRF2	0.336951	2.34513	4.10851	6.14e-05	0.00102287	Significantly upregulated (Adj-P<0.01)
ENSG00000140931.19_CMTM3	CMTM3	0.406375	1.56178	4.08975	6.61e-05	0.00107328	Significantly upregulated (Adj-P<0.01)
ENSG00000204272.12_NBDY	NBDY	0.327247	1.50012	4.07866	6.9e-05	0.00110452	Significantly upregulated (Adj-P<0.01)
ENSG00000122642.10_FKBP9	FKBP9	0.180688	5.08297	4.17129	4.79e-05	0.000841264	Significantly upregulated (Adj-P<0.01)
ENSG00000015676.17_NUDCD3	NUDCD3	-0.134593	6.60285	-4.16572	4.89e-05	0.000857263	Significantly downregulated (Adj-P<0.01)
ENSG00000167100.14_SAMD14	SAMD14	0.32257	1.17071	4.07199	7.09e-05	0.00112459	Significantly upregulated (Adj-P<0.01)
ENSG00000163644.14_PPM1K	PPM1K	-0.50339	4.88292	-4.16577	4.89e-05	0.000857263	Significantly downregulated (Adj-P<0.01)
ENSG00000240801.1_AC132217.1	AC132217.1	0.633391	0.827996	4.05461	7.58e-05	0.00118806	Significantly upregulated (Adj-P<0.01)
ENSG00000008853.16_RHOBTB2	RHOBTB2	0.210776	4.44775	4.16129	4.98e-05	0.000869608	Significantly upregulated (Adj-P<0.01)
ENSG00000135596.17_MICAL1	MICAL1	0.295169	2.74153	4.12428	5.77e-05	0.000971438	Significantly upregulated (Adj-P<0.01)
ENSG00000205593.11_DENND6B	DENND6B	0.445037	-0.232365	4.02194	8.61e-05	0.00129455	Significantly upregulated (Adj-P<0.01)
ENSG00000101464.10_PIGU	PIGU	-0.169801	2.98083	-4.12377	5.78e-05	0.000972381	Significantly downregulated (Adj-P<0.01)
ENSG00000170275.14_CRTAP	CRTAP	0.237531	6.04491	4.16051	5e-05	0.000871347	Significantly upregulated (Adj-P<0.01)
ENSG00000111912.19_NCOA7	NCOA7	0.329241	2.07464	4.08357	6.77e-05	0.00108897	Significantly upregulated (Adj-P<0.01)
ENSG00000138316.10_ADAMTS14	ADAMTS14	0.772144	-1.9444	4.01707	8.78e-05	0.00131083	Significantly upregulated (Adj-P<0.01)
ENSG00000176595.3_KBTBD11	KBTBD11	0.420316	1.11287	4.0538	7.61e-05	0.00119063	Significantly upregulated (Adj-P<0.01)
ENSG00000055332.17_EIF2AK2	EIF2AK2	0.221121	4.28103	4.15115	5.19e-05	0.000897409	Significantly upregulated (Adj-P<0.01)
ENSG00000107282.7_APBA1	APBA1	-0.364554	2.71504	-4.10726	6.17e-05	0.00102576	Significantly downregulated (Adj-P<0.01)
ENSG00000172780.16_RAB43	RAB43	0.829696	-0.857315	4.00863	9.07e-05	0.00134163	Significantly upregulated (Adj-P<0.01)
ENSG00000072840.12_EVC	EVC	0.376497	1.34029	4.05949	7.44e-05	0.00117267	Significantly upregulated (Adj-P<0.01)
ENSG00000115226.9_FNDC4	FNDC4	0.610901	-0.572813	4.0114	8.97e-05	0.00133108	Significantly upregulated (Adj-P<0.01)
ENSG00000111142.13_METAP2	METAP2	-0.139882	6.06815	-4.15443	5.12e-05	0.000888735	Significantly downregulated (Adj-P<0.01)
ENSG00000157483.8_MYO1E	MYO1E	0.254469	2.95855	4.1134	6.02e-05	0.0010076	Significantly upregulated (Adj-P<0.01)
ENSG00000118707.9_TGIF2	TGIF2	0.414883	0.201759	4.01681	8.79e-05	0.00131087	Significantly upregulated (Adj-P<0.01)
ENSG00000183808.11_RBM12B	RBM12B	-0.234647	2.98482	-4.10685	6.18e-05	0.00102631	Significantly downregulated (Adj-P<0.01)
ENSG00000261116.1_AL049555.1	AL049555.1	-0.734226	-0.56929	-4.00195	9.31e-05	0.00136872	Significantly downregulated (Adj-P<0.01)
ENSG00000182372.9_CLN8	CLN8	0.202447	3.86637	4.13592	5.51e-05	0.000936264	Significantly upregulated (Adj-P<0.01)
ENSG00000198952.8_SMG5	SMG5	-0.143504	6.57561	-4.14288	5.36e-05	0.000919254	Significantly downregulated (Adj-P<0.01)
ENSG00000172466.15_ZNF24	ZNF24	-0.18384	5.76326	-4.14489	5.32e-05	0.000913926	Significantly downregulated (Adj-P<0.01)
ENSG00000091106.18_NLRC4	NLRC4	-0.351337	0.0590171	-3.99957	9.39e-05	0.00137652	Significantly downregulated (Adj-P<0.01)
ENSG00000232434.2_AJM1	AJM1	0.313117	2.35252	4.08889	6.63e-05	0.00107531	Significantly upregulated (Adj-P<0.01)
ENSG00000184194.5_GPR173	GPR173	0.53295	-1.0881	3.99016	9.74e-05	0.00141393	Significantly upregulated (Adj-P<0.01)
ENSG00000232956.8_SNHG15	SNHG15	-0.279977	1.43831	-4.0428	7.94e-05	0.0012318	Significantly downregulated (Adj-P<0.01)
ENSG00000170852.10_KBTBD2	KBTBD2	0.239262	5.94466	4.13879	5.45e-05	0.000929798	Significantly upregulated (Adj-P<0.01)
ENSG00000156050.8_FAM161B	FAM161B	-0.155648	3.10627	-4.10057	6.33e-05	0.00103997	Significantly downregulated (Adj-P<0.01)
ENSG00000011009.10_LYPLA2	LYPLA2	-0.184529	3.90448	-4.12585	5.73e-05	0.000966467	Significantly downregulated (Adj-P<0.01)
ENSG00000272086.1_AC025181.2	AC025181.2	0.358742	-0.226465	3.99173	9.68e-05	0.00140963	Significantly upregulated (Adj-P<0.01)
ENSG00000168237.17_GLYCTK	GLYCTK	0.325704	0.613618	4.01881	8.72e-05	0.00130449	Significantly upregulated (Adj-P<0.01)
ENSG00000001461.16_NIPAL3	NIPAL3	0.292745	2.92216	4.09396	6.5e-05	0.00106067	Significantly upregulated (Adj-P<0.01)
ENSG00000161654.9_LSM12	LSM12	-0.139975	4.49787	-4.13015	5.64e-05	0.000952226	Significantly downregulated (Adj-P<0.01)
ENSG00000162458.12_FBLIM1	FBLIM1	0.452852	0.540969	4.01065	9e-05	0.00133368	Significantly upregulated (Adj-P<0.01)
ENSG00000084072.16_PPIE	PPIE	-0.135528	4.38387	-4.13052	5.63e-05	0.000951857	Significantly downregulated (Adj-P<0.01)
ENSG00000116285.12_ERRFI1	ERRFI1	-0.303929	3.40088	-4.10074	6.33e-05	0.00103997	Significantly downregulated (Adj-P<0.01)
ENSG00000130589.16_HELZ2	HELZ2	0.376236	2.50156	4.07724	6.94e-05	0.00110953	Significantly upregulated (Adj-P<0.01)
ENSG00000258839.3_MC1R	MC1R	0.388403	0.0712287	3.99116	9.7e-05	0.00141143	Significantly upregulated (Adj-P<0.01)
ENSG00000136960.12_ENPP2	ENPP2	0.393923	2.04443	4.05078	7.7e-05	0.00120115	Significantly upregulated (Adj-P<0.01)
ENSG00000271420.1_AL109936.2	AL109936.2	-0.407173	0.0833755	-3.98121	0.000100815	0.00145196	Significantly downregulated (Adj-P<0.01)
ENSG00000158292.6_GPR153	GPR153	0.427296	0.10276	3.98998	9.75e-05	0.00141393	Significantly upregulated (Adj-P<0.01)
ENSG00000124107.5_SLPI	SLPI	-1.03676	0.187937	-3.98017	0.000101218	0.0014563	Significantly downregulated (Adj-P<0.01)
ENSG00000153815.16_CMIP	CMIP	0.380534	1.31881	4.02152	8.63e-05	0.00129455	Significantly upregulated (Adj-P<0.01)
ENSG00000068903.19_SIRT2	SIRT2	-0.163333	7.58393	-4.10731	6.17e-05	0.00102576	Significantly downregulated (Adj-P<0.01)
ENSG00000278129.1_ZNF8	ZNF8	0.353493	1.25818	4.0145	8.86e-05	0.00131894	Significantly upregulated (Adj-P<0.01)
ENSG00000176720.5_BOK	BOK	0.507937	1.67951	4.03615	8.15e-05	0.00125901	Significantly upregulated (Adj-P<0.01)
ENSG00000176387.6_HSD11B2	HSD11B2	0.592442	-1.36547	3.96565	0.000107032	0.00152044	Significantly upregulated (Adj-P<0.01)
ENSG00000163875.15_MEAF6	MEAF6	-0.132944	4.24606	-4.10966	6.11e-05	0.00102039	Significantly downregulated (Adj-P<0.01)
ENSG00000183230.16_CTNNA3	CTNNA3	0.347828	5.59338	4.11594	5.96e-05	0.000999691	Significantly upregulated (Adj-P<0.01)
ENSG00000144659.12_SLC25A38	SLC25A38	-0.16706	4.52893	-4.11149	6.07e-05	0.00101415	Significantly downregulated (Adj-P<0.01)
ENSG00000091490.10_SEL1L3	SEL1L3	0.385194	1.12783	4.00552	9.18e-05	0.00135536	Significantly upregulated (Adj-P<0.01)
ENSG00000163374.19_YY1AP1	YY1AP1	-0.125237	5.67019	-4.11473	5.99e-05	0.0010034	Significantly downregulated (Adj-P<0.01)
ENSG00000132003.9_ZSWIM4	ZSWIM4	0.40812	-0.163729	3.9668	0.000106559	0.00151617	Significantly upregulated (Adj-P<0.01)
ENSG00000180357.9_ZNF609	ZNF609	0.179127	3.93799	4.09946	6.36e-05	0.00104228	Significantly upregulated (Adj-P<0.01)
ENSG00000136861.17_CDK5RAP2	CDK5RAP2	-0.155321	6.22762	-4.10898	6.13e-05	0.00102207	Significantly downregulated (Adj-P<0.01)
ENSG00000175161.13_CADM2	CADM2	0.393625	2.84908	4.06146	7.38e-05	0.00116483	Significantly upregulated (Adj-P<0.01)
ENSG00000198938.2_MT-CO3	MT-CO3	0.355865	13.4049	4.02791	8.42e-05	0.00127378	Significantly upregulated (Adj-P<0.01)
ENSG00000168439.16_STIP1	STIP1	-0.193362	6.03769	-4.10546	6.21e-05	0.0010284	Significantly downregulated (Adj-P<0.01)
ENSG00000203727.3_SAMD5	SAMD5	0.696618	-1.47343	3.95935	0.000109654	0.00154233	Significantly upregulated (Adj-P<0.01)
ENSG00000116157.5_GPX7	GPX7	0.218935	1.80351	4.02172	8.62e-05	0.00129455	Significantly upregulated (Adj-P<0.01)
ENSG00000189283.9_FHIT	FHIT	0.335359	0.700907	3.98368	9.99e-05	0.00144069	Significantly upregulated (Adj-P<0.01)
ENSG00000104888.9_SLC17A7	SLC17A7	0.424426	0.224578	3.96826	0.000105966	0.00151076	Significantly upregulated (Adj-P<0.01)
ENSG00000154710.17_RABGEF1	RABGEF1	-0.114341	4.57552	-4.10005	6.35e-05	0.00104095	Significantly downregulated (Adj-P<0.01)
ENSG00000168077.13_SCARA3	SCARA3	0.570537	0.439789	3.97302	0.000104043	0.00149147	Significantly upregulated (Adj-P<0.01)
ENSG00000084731.14_KIF3C	KIF3C	0.251934	1.37355	4.00288	9.27e-05	0.0013654	Significantly upregulated (Adj-P<0.01)
ENSG00000099622.13_CIRBP	CIRBP	-0.216643	7.9146	-4.08462	6.74e-05	0.00108672	Significantly downregulated (Adj-P<0.01)
ENSG00000181751.9_C5orf30	C5orf30	0.294935	2.45438	4.03979	8.04e-05	0.00124293	Significantly upregulated (Adj-P<0.01)
ENSG00000105329.9_TGFB1	TGFB1	0.399426	2.08206	4.03382	8.22e-05	0.0012631	Significantly upregulated (Adj-P<0.01)
ENSG00000068308.13_OTUD5	OTUD5	-0.127521	4.42816	-4.09647	6.44e-05	0.00105132	Significantly downregulated (Adj-P<0.01)
ENSG00000177885.14_GRB2	GRB2	-0.100603	5.26817	-4.09836	6.39e-05	0.00104572	Significantly downregulated (Adj-P<0.01)
ENSG00000130303.12_BST2	BST2	0.31749	3.97866	4.08829	6.65e-05	0.00107626	Significantly upregulated (Adj-P<0.01)
ENSG00000164902.13_PHAX	PHAX	-0.119555	4.49445	-4.09057	6.59e-05	0.00107154	Significantly downregulated (Adj-P<0.01)
ENSG00000138131.3_LOXL4	LOXL4	-0.472741	2.44098	-4.02816	8.41e-05	0.00127378	Significantly downregulated (Adj-P<0.01)
ENSG00000114854.7_TNNC1	TNNC1	-0.3743	11.5943	-4.03046	8.33e-05	0.00127235	Significantly downregulated (Adj-P<0.01)
ENSG00000285106.1_AC016831.6	AC016831.6	-0.311988	1.66036	-3.99333	9.62e-05	0.00140226	Significantly downregulated (Adj-P<0.01)
ENSG00000109079.9_TNFAIP1	TNFAIP1	0.111678	4.14093	4.08324	6.78e-05	0.00108927	Significantly upregulated (Adj-P<0.01)
ENSG00000259820.1_AC083843.2	AC083843.2	-0.34535	2.83935	-4.03973	8.04e-05	0.00124293	Significantly downregulated (Adj-P<0.01)
ENSG00000170445.13_HARS	HARS	-0.124219	4.53624	-4.08814	6.65e-05	0.00107626	Significantly downregulated (Adj-P<0.01)
ENSG00000100239.15_PPP6R2	PPP6R2	-0.130582	5.96248	-4.08963	6.61e-05	0.00107328	Significantly downregulated (Adj-P<0.01)
ENSG00000140525.17_FANCI	FANCI	0.412736	-0.638366	3.93559	0.000120094	0.00164783	Significantly upregulated (Adj-P<0.01)
ENSG00000172578.11_KLHL6	KLHL6	0.480617	-0.437193	3.93748	0.000119231	0.00164173	Significantly upregulated (Adj-P<0.01)
ENSG00000136631.14_VPS45	VPS45	-0.133149	4.07296	-4.07672	6.96e-05	0.00110956	Significantly downregulated (Adj-P<0.01)
ENSG00000138942.15_RNF185	RNF185	-0.124015	4.34582	-4.0822	6.81e-05	0.00109059	Significantly downregulated (Adj-P<0.01)
ENSG00000129518.8_EAPP	EAPP	-0.147222	3.39089	-4.05622	7.54e-05	0.00118261	Significantly downregulated (Adj-P<0.01)
ENSG00000162545.5_CAMK2N1	CAMK2N1	0.293743	1.67156	3.99026	9.74e-05	0.00141393	Significantly upregulated (Adj-P<0.01)
ENSG00000168872.16_DDX19A	DDX19A	-0.0996381	5.53337	-4.08378	6.77e-05	0.00108897	Significantly downregulated (Adj-P<0.01)
ENSG00000277443.2_MARCKS	MARCKS	0.28866	3.79463	4.06675	7.23e-05	0.00114442	Significantly upregulated (Adj-P<0.01)
ENSG00000174749.5_FAM241A	FAM241A	0.24961	3.39626	4.04847	7.77e-05	0.00120961	Significantly upregulated (Adj-P<0.01)
ENSG00000099840.13_IZUMO4	IZUMO4	-0.535856	0.482114	-3.94327	0.000116619	0.00161142	Significantly downregulated (Adj-P<0.01)
ENSG00000196666.4_FAM180B	FAM180B	0.754947	-1.69347	3.92443	0.000125318	0.00170461	Significantly upregulated (Adj-P<0.01)
ENSG00000036448.9_MYOM2	MYOM2	-0.260247	9.95453	-4.03545	8.17e-05	0.00125901	Significantly downregulated (Adj-P<0.01)
ENSG00000260244.1_AC104083.1	AC104083.1	0.338609	1.75165	3.98118	0.000100824	0.00145196	Significantly upregulated (Adj-P<0.01)
ENSG00000250451.5_HOXC-AS1	HOXC-AS1	-0.394794	1.06253	-3.96796	0.000106088	0.00151113	Significantly downregulated (Adj-P<0.01)
ENSG00000198783.5_ZNF830	ZNF830	-0.169204	2.75813	-4.02043	8.66e-05	0.00129777	Significantly downregulated (Adj-P<0.01)
ENSG00000234545.7_FAM133B	FAM133B	-0.14805	3.7211	-4.04873	7.76e-05	0.00120961	Significantly downregulated (Adj-P<0.01)
ENSG00000171988.18_JMJD1C	JMJD1C	0.220978	4.90829	4.0721	7.08e-05	0.00112459	Significantly upregulated (Adj-P<0.01)
ENSG00000057657.16_PRDM1	PRDM1	0.507872	-0.583881	3.91577	0.000129524	0.00174252	Significantly upregulated (Adj-P<0.01)
ENSG00000172965.15_MIR4435-2HG	MIR4435-2HG	0.390455	0.768834	3.94798	0.000114539	0.00159162	Significantly upregulated (Adj-P<0.01)
ENSG00000145545.11_SRD5A1	SRD5A1	0.236492	1.38885	3.96662	0.000106635	0.00151617	Significantly upregulated (Adj-P<0.01)
ENSG00000163346.16_PBXIP1	PBXIP1	-0.199957	7.26515	-4.05727	7.51e-05	0.00118166	Significantly downregulated (Adj-P<0.01)
ENSG00000083444.16_PLOD1	PLOD1	0.209373	4.73797	4.06728	7.22e-05	0.00114323	Significantly upregulated (Adj-P<0.01)
ENSG00000109771.15_LRP2BP	LRP2BP	-0.361133	1.46941	-3.96003	0.000109368	0.00153969	Significantly downregulated (Adj-P<0.01)
ENSG00000123349.13_PFDN5	PFDN5	-0.167349	6.31047	-4.06213	7.36e-05	0.00116297	Significantly downregulated (Adj-P<0.01)
ENSG00000168961.16_LGALS9	LGALS9	0.431166	1.34467	3.97153	0.000104641	0.00149731	Significantly upregulated (Adj-P<0.01)
ENSG00000037474.14_NSUN2	NSUN2	-0.100789	5.33325	-4.06639	7.24e-05	0.00114489	Significantly downregulated (Adj-P<0.01)
ENSG00000117899.10_MESD	MESD	-0.131903	3.35208	-4.03407	8.22e-05	0.0012631	Significantly downregulated (Adj-P<0.01)
ENSG00000256229.7_ZNF486	ZNF486	0.465197	-1.06074	3.90734	0.00013374	0.00178817	Significantly upregulated (Adj-P<0.01)
ENSG00000124831.18_LRRFIP1	LRRFIP1	-0.149412	6.97916	-4.05246	7.65e-05	0.00119569	Significantly downregulated (Adj-P<0.01)
ENSG00000156239.11_N6AMT1	N6AMT1	-0.162218	3.34339	-4.02849	8.4e-05	0.00127335	Significantly downregulated (Adj-P<0.01)
ENSG00000112079.8_STK38	STK38	0.177617	3.69708	4.04075	8e-05	0.00124042	Significantly upregulated (Adj-P<0.01)
ENSG00000185627.17_PSMD13	PSMD13	-0.127891	6.05561	-4.05604	7.54e-05	0.00118261	Significantly downregulated (Adj-P<0.01)
ENSG00000113532.12_ST8SIA4	ST8SIA4	0.485926	0.493652	3.92027	0.000127323	0.0017226	Significantly upregulated (Adj-P<0.01)
ENSG00000164741.14_DLC1	DLC1	0.296497	3.53406	4.03019	8.34e-05	0.00127235	Significantly upregulated (Adj-P<0.01)
ENSG00000075234.16_TTC38	TTC38	-0.202236	3.42119	-4.02717	8.44e-05	0.00127378	Significantly downregulated (Adj-P<0.01)
ENSG00000189409.13_MMP23B	MMP23B	0.79287	-1.73454	3.893	0.00014122	0.00186308	Significantly upregulated (Adj-P<0.01)
ENSG00000198689.11_SLC9A6	SLC9A6	-0.165215	3.78741	-4.02934	8.37e-05	0.00127272	Significantly downregulated (Adj-P<0.01)
ENSG00000243244.6_STON1	STON1	0.362436	1.80383	3.95607	0.000111041	0.00155765	Significantly upregulated (Adj-P<0.01)
ENSG00000214872.8_SMTNL1	SMTNL1	-0.37425	8.1436	-4.02887	8.38e-05	0.00127272	Significantly downregulated (Adj-P<0.01)
ENSG00000173681.16_BCLAF3	BCLAF3	-0.19131	3.35444	-4.01511	8.84e-05	0.00131704	Significantly downregulated (Adj-P<0.01)
ENSG00000101695.8_RNF125	RNF125	0.371811	1.93734	3.96194	0.000108567	0.00153115	Significantly upregulated (Adj-P<0.01)
ENSG00000114784.3_EIF1B	EIF1B	-0.137049	5.16372	-4.04601	7.84e-05	0.00121767	Significantly downregulated (Adj-P<0.01)
ENSG00000168502.17_MTCL1	MTCL1	0.331763	1.93653	3.96378	0.000107805	0.0015259	Significantly upregulated (Adj-P<0.01)
ENSG00000139146.13_SINHCAF	SINHCAF	0.38047	0.180859	3.89556	0.000139857	0.00184948	Significantly upregulated (Adj-P<0.01)
ENSG00000130584.10_ZBTB46	ZBTB46	0.232021	2.61028	3.9873	9.85e-05	0.00142553	Significantly upregulated (Adj-P<0.01)
ENSG00000137693.13_YAP1	YAP1	0.225798	6.53782	4.03475	8.19e-05	0.001261	Significantly upregulated (Adj-P<0.01)
ENSG00000181396.12_OGFOD3	OGFOD3	-0.21215	4.13759	-4.03025	8.34e-05	0.00127235	Significantly downregulated (Adj-P<0.01)
ENSG00000163617.10_CCDC191	CCDC191	0.307584	0.394799	3.89886	0.000138118	0.00183266	Significantly upregulated (Adj-P<0.01)
ENSG00000183762.12_KREMEN1	KREMEN1	-0.250846	6.07679	-4.03581	8.16e-05	0.00125901	Significantly downregulated (Adj-P<0.01)
ENSG00000161921.14_CXCL16	CXCL16	0.509694	-0.0694641	3.88912	0.000143314	0.00188566	Significantly upregulated (Adj-P<0.01)
ENSG00000204386.10_NEU1	NEU1	-0.140838	3.27019	-4.00527	9.19e-05	0.00135536	Significantly downregulated (Adj-P<0.01)
ENSG00000132424.15_PNISR	PNISR	-0.180783	7.10125	-4.02731	8.43e-05	0.00127378	Significantly downregulated (Adj-P<0.01)
ENSG00000198937.8_CCDC167	CCDC167	0.3169	1.64316	3.95411	0.000111877	0.00156798	Significantly upregulated (Adj-P<0.01)
ENSG00000124593.16_AL365205.1	AL365205.1	0.274441	2.18713	3.97249	0.000104255	0.00149315	Significantly upregulated (Adj-P<0.01)
ENSG00000162384.13_C1orf123	C1orf123	-0.137303	5.16723	-4.03541	8.17e-05	0.00125901	Significantly downregulated (Adj-P<0.01)
ENSG00000105568.17_PPP2R1A	PPP2R1A	-0.135217	7.04834	-4.02369	8.55e-05	0.00128984	Significantly downregulated (Adj-P<0.01)
ENSG00000106546.13_AHR	AHR	0.402373	1.8702	3.94253	0.00011695	0.00161457	Significantly upregulated (Adj-P<0.01)
ENSG00000044574.7_HSPA5	HSPA5	-0.157415	6.34006	-4.02904	8.38e-05	0.00127272	Significantly downregulated (Adj-P<0.01)
ENSG00000060688.12_SNRNP40	SNRNP40	-0.127602	2.95021	-3.98714	9.85e-05	0.00142553	Significantly downregulated (Adj-P<0.01)
ENSG00000071054.16_MAP4K4	MAP4K4	0.203268	5.77273	4.03153	8.3e-05	0.00127123	Significantly upregulated (Adj-P<0.01)
ENSG00000090273.13_NUDC	NUDC	-0.173166	5.6834	-4.03142	8.3e-05	0.00127123	Significantly downregulated (Adj-P<0.01)
ENSG00000276234.4_TADA2A	TADA2A	-0.156186	2.99511	-3.9844	9.96e-05	0.00143803	Significantly downregulated (Adj-P<0.01)
ENSG00000101945.16_SUV39H1	SUV39H1	-0.20698	2.12928	-3.95384	0.000111996	0.00156825	Significantly downregulated (Adj-P<0.01)
ENSG00000126067.11_PSMB2	PSMB2	-0.120802	5.19692	-4.0295	8.36e-05	0.00127272	Significantly downregulated (Adj-P<0.01)
ENSG00000063660.8_GPC1	GPC1	-0.21184	7.21763	-4.01779	8.75e-05	0.0013084	Significantly downregulated (Adj-P<0.01)
ENSG00000197818.11_SLC9A8	SLC9A8	-0.149532	4.33433	-4.02262	8.59e-05	0.00129398	Significantly downregulated (Adj-P<0.01)
ENSG00000146700.8_SSC4D	SSC4D	0.425372	-1.07645	3.86612	0.00015632	0.00200962	Significantly upregulated (Adj-P<0.01)
ENSG00000140395.8_WDR61	WDR61	-0.116693	3.96558	-4.01523	8.84e-05	0.00131704	Significantly downregulated (Adj-P<0.01)
ENSG00000034510.5_TMSB10	TMSB10	0.393463	5.01511	4.02741	8.43e-05	0.00127378	Significantly upregulated (Adj-P<0.01)
ENSG00000117519.15_CNN3	CNN3	0.290188	3.34159	4.00001	9.38e-05	0.00137652	Significantly upregulated (Adj-P<0.01)
ENSG00000085741.12_WNT11	WNT11	0.291026	2.567	3.97654	0.000102643	0.00147425	Significantly upregulated (Adj-P<0.01)
ENSG00000080371.5_RAB21	RAB21	-0.162772	6.58478	-4.02039	8.66e-05	0.00129777	Significantly downregulated (Adj-P<0.01)
ENSG00000204851.6_PNMA8B	PNMA8B	0.394923	0.00567264	3.87846	0.00014921	0.00194692	Significantly upregulated (Adj-P<0.01)
ENSG00000099250.17_NRP1	NRP1	0.319612	5.46183	4.02165	8.62e-05	0.00129455	Significantly upregulated (Adj-P<0.01)
ENSG00000180626.9_ZNF594	ZNF594	-0.228536	2.48111	-3.95323	0.000112258	0.00157051	Significantly downregulated (Adj-P<0.01)
ENSG00000149016.15_TUT1	TUT1	-0.178916	3.74026	-4.00176	9.31e-05	0.00136872	Significantly downregulated (Adj-P<0.01)
ENSG00000169131.12_ZNF354A	ZNF354A	0.261959	1.86432	3.93011	0.000122636	0.00167466	Significantly upregulated (Adj-P<0.01)
ENSG00000165898.13_ISCA2	ISCA2	-0.178493	3.95558	-4.00533	9.18e-05	0.00135536	Significantly downregulated (Adj-P<0.01)
ENSG00000123096.11_SSPN	SSPN	-0.217841	6.56625	-4.01399	8.88e-05	0.00132027	Significantly downregulated (Adj-P<0.01)
ENSG00000138801.8_PAPSS1	PAPSS1	0.236308	2.0165	3.93897	0.000118554	0.00163384	Significantly upregulated (Adj-P<0.01)
ENSG00000136932.13_TRMO	TRMO	-0.203146	1.94661	-3.92999	0.000122689	0.00167466	Significantly downregulated (Adj-P<0.01)
ENSG00000213064.9_SFT2D2	SFT2D2	0.201803	3.66069	3.99585	9.53e-05	0.00139272	Significantly upregulated (Adj-P<0.01)
ENSG00000120616.15_EPC1	EPC1	-0.137774	4.50479	-4.00973	9.03e-05	0.00133717	Significantly downregulated (Adj-P<0.01)
ENSG00000117602.11_RCAN3	RCAN3	0.337693	0.628003	3.87669	0.00015021	0.00195247	Significantly upregulated (Adj-P<0.01)
ENSG00000152795.17_HNRNPDL	HNRNPDL	-0.138051	7.59297	-3.99979	9.38e-05	0.00137652	Significantly downregulated (Adj-P<0.01)
ENSG00000152518.7_ZFP36L2	ZFP36L2	0.204494	4.93905	4.01223	8.94e-05	0.00132806	Significantly upregulated (Adj-P<0.01)
ENSG00000170385.9_SLC30A1	SLC30A1	0.34869	2.22259	3.93523	0.000120258	0.00164864	Significantly upregulated (Adj-P<0.01)
ENSG00000171246.5_NPTX1	NPTX1	-1.13317	0.935552	-3.87765	0.000149665	0.00195123	Significantly downregulated (Adj-P<0.01)
ENSG00000196074.12_SYCP2	SYCP2	0.461556	-0.215958	3.85239	0.000164617	0.002094	Significantly upregulated (Adj-P<0.01)
ENSG00000158769.17_F11R	F11R	0.274673	2.579	3.94891	0.000114129	0.00158849	Significantly upregulated (Adj-P<0.01)
ENSG00000255737.2_AGAP2-AS1	AGAP2-AS1	0.441417	-0.999938	3.84223	0.00017102	0.0021597	Significantly upregulated (Adj-P<0.01)
ENSG00000071205.11_ARHGAP10	ARHGAP10	-0.18748	4.86527	-4.00432	9.22e-05	0.00135909	Significantly downregulated (Adj-P<0.01)
ENSG00000108231.12_LGI1	LGI1	-0.531468	2.40201	-3.93008	0.000122648	0.00167466	Significantly downregulated (Adj-P<0.01)
ENSG00000136271.10_DDX56	DDX56	-0.118295	4.32889	-3.99582	9.53e-05	0.00139272	Significantly downregulated (Adj-P<0.01)
ENSG00000090487.10_SPG21	SPG21	0.203654	4.3236	3.99548	9.54e-05	0.00139323	Significantly upregulated (Adj-P<0.01)
ENSG00000277494.1_GPIHBP1	GPIHBP1	0.331495	3.80349	3.98739	9.84e-05	0.00142553	Significantly upregulated (Adj-P<0.01)
ENSG00000119707.13_RBM25	RBM25	-0.158238	6.34181	-3.99788	9.45e-05	0.00138422	Significantly downregulated (Adj-P<0.01)
ENSG00000158417.10_EIF5B	EIF5B	-0.173984	6.89766	-3.99436	9.58e-05	0.00139796	Significantly downregulated (Adj-P<0.01)
ENSG00000140678.16_ITGAX	ITGAX	0.718061	0.26495	3.85587	0.000162478	0.00207351	Significantly upregulated (Adj-P<0.01)
ENSG00000145388.14_METTL14	METTL14	-0.134851	3.33832	-3.96423	0.000107618	0.00152462	Significantly downregulated (Adj-P<0.01)
ENSG00000267858.5_MZF1-AS1	MZF1-AS1	0.414014	-0.620004	3.83291	0.000177101	0.00220632	Significantly upregulated (Adj-P<0.01)
ENSG00000128268.11_MGAT3	MGAT3	0.336349	0.74596	3.87295	0.000152346	0.00197472	Significantly upregulated (Adj-P<0.01)
ENSG00000121068.13_TBX2	TBX2	0.343896	2.82125	3.94927	0.000113973	0.00158849	Significantly upregulated (Adj-P<0.01)
ENSG00000063180.8_CA11	CA11	0.31471	1.25278	3.89296	0.000141241	0.00186308	Significantly upregulated (Adj-P<0.01)
ENSG00000134917.9_ADAMTS8	ADAMTS8	0.742564	-0.128206	3.84625	0.000168459	0.00213595	Significantly upregulated (Adj-P<0.01)
ENSG00000163510.13_CWC22	CWC22	-0.148385	3.46772	-3.96294	0.000108154	0.0015267	Significantly downregulated (Adj-P<0.01)
ENSG00000149575.5_SCN2B	SCN2B	-0.462604	3.50118	-3.96474	0.000107407	0.001523	Significantly downregulated (Adj-P<0.01)
ENSG00000187678.9_SPRY4	SPRY4	0.335788	2.0605	3.91572	0.000129548	0.00174252	Significantly upregulated (Adj-P<0.01)
ENSG00000145907.14_G3BP1	G3BP1	-0.172253	6.67713	-3.98684	9.87e-05	0.00142591	Significantly downregulated (Adj-P<0.01)
ENSG00000137501.17_SYTL2	SYTL2	0.348009	2.31765	3.92224	0.00012637	0.00171594	Significantly upregulated (Adj-P<0.01)
ENSG00000179965.11_ZNF771	ZNF771	-0.272698	2.7007	-3.93645	0.000119701	0.00164532	Significantly downregulated (Adj-P<0.01)
ENSG00000129219.13_PLD2	PLD2	0.249726	2.00142	3.91338	0.000130705	0.00175658	Significantly upregulated (Adj-P<0.01)
ENSG00000092068.19_SLC7A8	SLC7A8	-0.287457	3.81013	-3.97065	0.000104996	0.001501	Significantly downregulated (Adj-P<0.01)
ENSG00000169744.12_LDB2	LDB2	0.333077	2.83641	3.93921	0.000118445	0.00163377	Significantly upregulated (Adj-P<0.01)
ENSG00000120802.13_TMPO	TMPO	-0.198195	3.93734	-3.96857	0.000105837	0.0015103	Significantly downregulated (Adj-P<0.01)
ENSG00000122359.17_ANXA11	ANXA11	-0.150947	7.02933	-3.97651	0.000102654	0.00147425	Significantly downregulated (Adj-P<0.01)
ENSG00000120334.15_CENPL	CENPL	0.255744	0.748679	3.85087	0.00016556	0.00210089	Significantly upregulated (Adj-P<0.01)
ENSG00000260428.2_SCX	SCX	-0.450823	2.14585	-3.92401	0.000125519	0.00170586	Significantly downregulated (Adj-P<0.01)
ENSG00000152804.10_HHEX	HHEX	0.416378	0.270912	3.83634	0.000174843	0.00219211	Significantly upregulated (Adj-P<0.01)
ENSG00000181481.13_RNF135	RNF135	0.297461	1.92776	3.90008	0.00013748	0.00182847	Significantly upregulated (Adj-P<0.01)
ENSG00000007933.12_FMO3	FMO3	0.444839	1.01921	3.86042	0.000159718	0.00204828	Significantly upregulated (Adj-P<0.01)
ENSG00000245573.7_BDNF-AS	BDNF-AS	-0.383487	-0.670947	-3.81212	0.000191417	0.00235476	Significantly downregulated (Adj-P<0.01)
ENSG00000177370.4_TIMM22	TIMM22	-0.15411	3.39677	-3.94789	0.000114578	0.00159162	Significantly downregulated (Adj-P<0.01)
ENSG00000188643.10_S100A16	S100A16	0.31601	3.02189	3.94424	0.00011619	0.00160832	Significantly upregulated (Adj-P<0.01)
ENSG00000071626.16_DAZAP1	DAZAP1	-0.145013	5.78307	-3.97473	0.000103359	0.00148303	Significantly downregulated (Adj-P<0.01)
ENSG00000145358.6_DDIT4L	DDIT4L	0.43984	7.1923	3.96317	0.000108058	0.0015267	Significantly upregulated (Adj-P<0.01)
ENSG00000142303.13_ADAMTS10	ADAMTS10	0.325018	2.32291	3.91842	0.000128224	0.00173213	Significantly upregulated (Adj-P<0.01)
ENSG00000137996.12_RTCA	RTCA	0.13431	4.65159	3.97042	0.00010509	0.001501	Significantly upregulated (Adj-P<0.01)
ENSG00000108798.8_ABI3	ABI3	0.409957	0.279336	3.83248	0.000177385	0.0022081	Significantly upregulated (Adj-P<0.01)
ENSG00000168517.10_HEXIM2	HEXIM2	0.368587	3.3999	3.94908	0.000114056	0.00158849	Significantly upregulated (Adj-P<0.01)
ENSG00000184313.19_MROH7	MROH7	-0.518837	3.55375	-3.94376	0.0001164	0.00160981	Significantly downregulated (Adj-P<0.01)
ENSG00000249751.3_ECSCR	ECSCR	0.266172	1.74894	3.88622	0.000144894	0.00189974	Significantly upregulated (Adj-P<0.01)
ENSG00000090097.21_PCBP4	PCBP4	-0.228275	6.23837	-3.96518	0.000107228	0.00152184	Significantly downregulated (Adj-P<0.01)
ENSG00000211448.11_DIO2	DIO2	0.527973	1.67443	3.87164	0.000153103	0.00198126	Significantly upregulated (Adj-P<0.01)
ENSG00000140464.19_PML	PML	0.199413	3.70381	3.94967	0.000113797	0.00158849	Significantly upregulated (Adj-P<0.01)
ENSG00000278291.1_AL161772.1	AL161772.1	-0.468072	2.46174	-3.89987	0.000137591	0.00182847	Significantly downregulated (Adj-P<0.01)
ENSG00000102024.17_PLS3	PLS3	0.317613	4.59838	3.96115	0.000108899	0.00153445	Significantly upregulated (Adj-P<0.01)
ENSG00000146007.10_ZMAT2	ZMAT2	-0.12783	5.32393	-3.9634	0.000107963	0.0015267	Significantly downregulated (Adj-P<0.01)
ENSG00000239264.8_TXNDC5	TXNDC5	0.187524	3.87879	3.94886	0.00011415	0.00158849	Significantly upregulated (Adj-P<0.01)
ENSG00000271447.5_MMP28	MMP28	0.454699	0.709324	3.83374	0.000176554	0.00220124	Significantly upregulated (Adj-P<0.01)
ENSG00000254093.8_PINX1	PINX1	-0.221993	1.47343	-3.85498	0.000163023	0.00207878	Significantly downregulated (Adj-P<0.01)
ENSG00000120645.11_IQSEC3	IQSEC3	0.41593	0.478822	3.8263	0.000181541	0.00225091	Significantly upregulated (Adj-P<0.01)
ENSG00000111252.10_SH2B3	SH2B3	0.318292	3.49651	3.93596	0.000119927	0.00164697	Significantly upregulated (Adj-P<0.01)
ENSG00000100413.16_POLR3H	POLR3H	-0.177783	3.85044	-3.9461	0.000115362	0.00159969	Significantly downregulated (Adj-P<0.01)
ENSG00000147403.16_RPL10	RPL10	-0.150342	9.48195	-3.92009	0.000127409	0.0017226	Significantly downregulated (Adj-P<0.01)
ENSG00000087448.10_KLHL42	KLHL42	0.234039	2.1261	3.87735	0.000149833	0.00195154	Significantly upregulated (Adj-P<0.01)
ENSG00000204791.10_SMPD5	SMPD5	0.626146	-2.01144	3.78756	0.000209741	0.00252039	Significantly upregulated (Adj-P<0.01)
ENSG00000177084.16_POLE	POLE	-0.23823	5.06117	-3.95706	0.00011062	0.00155313	Significantly downregulated (Adj-P<0.01)
ENSG00000131196.17_NFATC1	NFATC1	-0.207999	5.46009	-3.95716	0.000110579	0.00155313	Significantly downregulated (Adj-P<0.01)
ENSG00000166073.10_GPR176	GPR176	0.491707	-0.00616995	3.7985	0.000201379	0.00245043	Significantly upregulated (Adj-P<0.01)
ENSG00000131171.12_SH3BGRL	SH3BGRL	0.349583	2.87183	3.90836	0.000133222	0.00178429	Significantly upregulated (Adj-P<0.01)
ENSG00000068394.10_GPKOW	GPKOW	-0.130753	4.20394	-3.94676	0.000115074	0.00159709	Significantly downregulated (Adj-P<0.01)
ENSG00000245532.8_NEAT1	NEAT1	-0.344644	10.5033	-3.9039	0.000135499	0.00180708	Significantly downregulated (Adj-P<0.01)
ENSG00000006638.11_TBXA2R	TBXA2R	0.495775	-0.642585	3.7872	0.00021002	0.00252039	Significantly upregulated (Adj-P<0.01)
ENSG00000177464.4_GPR4	GPR4	0.353871	0.261458	3.80324	0.000197858	0.00242072	Significantly upregulated (Adj-P<0.01)
ENSG00000186566.12_GPATCH8	GPATCH8	-0.203757	6.76542	-3.9458	0.000115499	0.00160016	Significantly downregulated (Adj-P<0.01)
ENSG00000105825.12_TFPI2	TFPI2	0.57036	-0.137918	3.7925	0.000205928	0.00248796	Significantly upregulated (Adj-P<0.01)
ENSG00000106348.17_IMPDH1	IMPDH1	0.348519	1.56387	3.85647	0.00016211	0.00207218	Significantly upregulated (Adj-P<0.01)
ENSG00000149633.11_KIAA1755	KIAA1755	0.573475	-0.749705	3.78304	0.000213288	0.00255377	Significantly upregulated (Adj-P<0.01)
ENSG00000125944.19_HNRNPR	HNRNPR	-0.111139	5.57001	-3.95058	0.000113404	0.00158513	Significantly downregulated (Adj-P<0.01)
ENSG00000010270.13_STARD3NL	STARD3NL	-0.17859	2.79175	-3.89614	0.000139552	0.00184857	Significantly downregulated (Adj-P<0.01)
ENSG00000213445.9_SIPA1	SIPA1	0.293209	2.74107	3.90313	0.000135895	0.00181082	Significantly upregulated (Adj-P<0.01)
ENSG00000182580.2_EPHB3	EPHB3	0.667349	-1.65474	3.77843	0.000216963	0.00257438	Significantly upregulated (Adj-P<0.01)
ENSG00000135926.14_TMBIM1	TMBIM1	-0.136807	6.64491	-3.93687	0.000119511	0.00164415	Significantly downregulated (Adj-P<0.01)
ENSG00000144182.16_LIPT1	LIPT1	-0.218743	1.92729	-3.85154	0.000165142	0.00209835	Significantly downregulated (Adj-P<0.01)
ENSG00000167065.13_DUSP18	DUSP18	0.398246	-0.341598	3.77776	0.000217506	0.00257481	Significantly upregulated (Adj-P<0.01)
ENSG00000267801.1_AC087289.5	AC087289.5	0.468767	0.641663	3.81323	0.000190625	0.00234869	Significantly upregulated (Adj-P<0.01)
ENSG00000130755.12_GMFG	GMFG	0.447174	0.498066	3.80211	0.000198694	0.00242716	Significantly upregulated (Adj-P<0.01)
ENSG00000120725.12_SIL1	SIL1	-0.185279	3.85519	-3.92528	0.000124913	0.00170205	Significantly downregulated (Adj-P<0.01)
ENSG00000185046.18_ANKS1B	ANKS1B	0.386521	1.66082	3.83953	0.000172762	0.00217295	Significantly upregulated (Adj-P<0.01)
ENSG00000101193.7_GID8	GID8	-0.10236	4.22981	-3.92958	0.000122883	0.00167584	Significantly downregulated (Adj-P<0.01)
ENSG00000135336.14_ORC3	ORC3	-0.169571	3.874	-3.91688	0.000128976	0.00174079	Significantly downregulated (Adj-P<0.01)
ENSG00000138698.14_RAP1GDS1	RAP1GDS1	0.243002	1.51935	3.83016	0.000178937	0.00222565	Significantly upregulated (Adj-P<0.01)
ENSG00000169641.13_LUZP1	LUZP1	0.275811	2.50744	3.87194	0.000152927	0.0019806	Significantly upregulated (Adj-P<0.01)
ENSG00000087074.7_PPP1R15A	PPP1R15A	-0.259947	5.13082	-3.93188	0.000121808	0.00166843	Significantly downregulated (Adj-P<0.01)
ENSG00000162664.16_ZNF326	ZNF326	-0.187771	3.83218	-3.91138	0.000131702	0.00176695	Significantly downregulated (Adj-P<0.01)
ENSG00000279557.1_AC010435.1	AC010435.1	0.57181	-1.21674	3.7597	0.000232534	0.00270377	Significantly upregulated (Adj-P<0.01)
ENSG00000114999.7_TTL	TTL	0.26001	5.57596	3.93028	0.000122554	0.00167466	Significantly upregulated (Adj-P<0.01)
ENSG00000100281.13_HMGXB4	HMGXB4	-0.184844	3.16197	-3.88708	0.000144424	0.00189709	Significantly downregulated (Adj-P<0.01)
ENSG00000103035.10_PSMD7	PSMD7	-0.108266	6.6584	-3.92085	0.000127043	0.00172211	Significantly downregulated (Adj-P<0.01)
ENSG00000142661.18_MYOM3	MYOM3	-0.348588	8.67695	-3.89969	0.000137686	0.00182847	Significantly downregulated (Adj-P<0.01)
ENSG00000125351.11_UPF3B	UPF3B	-0.182369	3.03865	-3.8755	0.000150888	0.00195905	Significantly downregulated (Adj-P<0.01)
ENSG00000067225.17_PKM	PKM	0.30187	10.5037	3.87096	0.000153492	0.00198395	Significantly upregulated (Adj-P<0.01)
ENSG00000213463.4_SYNJ2BP	SYNJ2BP	0.16945	6.42098	3.92178	0.00012659	0.00171745	Significantly upregulated (Adj-P<0.01)
ENSG00000198740.8_ZNF652	ZNF652	0.185929	3.89321	3.90753	0.000133645	0.00178817	Significantly upregulated (Adj-P<0.01)
ENSG00000103275.19_UBE2I	UBE2I	-0.139292	5.2142	-3.92476	0.000125164	0.00170398	Significantly downregulated (Adj-P<0.01)
ENSG00000127955.16_GNAI1	GNAI1	0.299638	2.836	3.87084	0.000153565	0.00198395	Significantly upregulated (Adj-P<0.01)
ENSG00000285781.1_AL117340.1	AL117340.1	-0.384957	0.195412	-3.77021	0.000223673	0.00263193	Significantly downregulated (Adj-P<0.01)
ENSG00000279759.1_AC118344.2	AC118344.2	0.216067	3.12027	3.88605	0.000144988	0.00189974	Significantly upregulated (Adj-P<0.01)
ENSG00000111231.8_GPN3	GPN3	-0.137865	4.41095	-3.91634	0.000129243	0.00174252	Significantly downregulated (Adj-P<0.01)
ENSG00000147799.11_ARHGAP39	ARHGAP39	0.416183	0.0933163	3.78144	0.000214556	0.00256046	Significantly upregulated (Adj-P<0.01)
ENSG00000162733.17_DDR2	DDR2	0.338963	3.82263	3.90407	0.000135415	0.00180708	Significantly upregulated (Adj-P<0.01)
ENSG00000111481.9_COPZ1	COPZ1	-0.0993284	5.49232	-3.9203	0.000127309	0.0017226	Significantly downregulated (Adj-P<0.01)
ENSG00000108786.10_HSD17B1	HSD17B1	0.261945	1.43048	3.81933	0.000186333	0.00230305	Significantly upregulated (Adj-P<0.01)
ENSG00000146122.16_DAAM2	DAAM2	0.36394	5.00151	3.91608	0.000129369	0.00174252	Significantly upregulated (Adj-P<0.01)
ENSG00000110492.15_MDK	MDK	0.409842	0.408182	3.78447	0.00021216	0.00254414	Significantly upregulated (Adj-P<0.01)
ENSG00000143324.13_XPR1	XPR1	0.209978	3.30253	3.88049	0.000148067	0.00193362	Significantly upregulated (Adj-P<0.01)
ENSG00000106404.13_CLDN15	CLDN15	0.350816	-0.00276457	3.76336	0.000229406	0.00267732	Significantly upregulated (Adj-P<0.01)
ENSG00000143772.9_ITPKB	ITPKB	0.289412	3.90963	3.90082	0.000137095	0.00182526	Significantly upregulated (Adj-P<0.01)
ENSG00000105835.11_NAMPT	NAMPT	0.298717	6.13154	3.91033	0.000132232	0.00177254	Significantly upregulated (Adj-P<0.01)
ENSG00000149357.9_LAMTOR1	LAMTOR1	-0.140432	5.07164	-3.91203	0.000131378	0.00176411	Significantly downregulated (Adj-P<0.01)
ENSG00000105618.13_PRPF31	PRPF31	-0.145016	4.59524	-3.90603	0.000134407	0.00179556	Significantly downregulated (Adj-P<0.01)
ENSG00000161265.14_U2AF1L4	U2AF1L4	-0.25345	3.40279	-3.88073	0.000147935	0.0019335	Significantly downregulated (Adj-P<0.01)
ENSG00000155729.12_KCTD18	KCTD18	0.133891	3.19264	3.86766	0.000155419	0.00199968	Significantly upregulated (Adj-P<0.01)
ENSG00000102931.7_ARL2BP	ARL2BP	0.143231	3.96359	3.89016	0.000142748	0.0018798	Significantly upregulated (Adj-P<0.01)
ENSG00000152402.10_GUCY1A2	GUCY1A2	0.335409	3.08701	3.85815	0.000161086	0.00206077	Significantly upregulated (Adj-P<0.01)
ENSG00000123600.19_METTL8	METTL8	0.185679	2.75681	3.84583	0.000168725	0.00213759	Significantly upregulated (Adj-P<0.01)
ENSG00000167676.4_PLIN4	PLIN4	-0.319628	8.76795	-3.87455	0.000151429	0.00196445	Significantly downregulated (Adj-P<0.01)
ENSG00000152904.11_GGPS1	GGPS1	-0.162339	3.97906	-3.88409	0.000146068	0.00191228	Significantly downregulated (Adj-P<0.01)
ENSG00000162734.12_PEA15	PEA15	0.256557	5.14698	3.89859	0.000138257	0.00183295	Significantly upregulated (Adj-P<0.01)
ENSG00000214402.6_LCNL1	LCNL1	0.504147	0.336002	3.76408	0.000228797	0.0026722	Significantly upregulated (Adj-P<0.01)
ENSG00000175264.7_CHST1	CHST1	0.404987	0.190679	3.74766	0.000243089	0.00280985	Significantly upregulated (Adj-P<0.01)
ENSG00000196569.12_LAMA2	LAMA2	0.274707	5.00906	3.89556	0.000139855	0.00184948	Significantly upregulated (Adj-P<0.01)
ENSG00000162390.17_ACOT11	ACOT11	-0.544957	4.40398	-3.88621	0.000144897	0.00189974	Significantly downregulated (Adj-P<0.01)
ENSG00000278959.1_AC006378.2	AC006378.2	-0.513862	-0.556668	-3.71721	0.000271859	0.00306785	Significantly downregulated (Adj-P<0.01)
ENSG00000182308.6_DCAF4L1	DCAF4L1	-0.404547	0.260677	-3.73329	0.000256289	0.00293219	Significantly downregulated (Adj-P<0.01)
ENSG00000166478.9_ZNF143	ZNF143	-0.165338	2.99887	-3.84335	0.000170304	0.00215238	Significantly downregulated (Adj-P<0.01)
ENSG00000116918.13_TSNAX	TSNAX	-0.177818	5.15811	-3.89322	0.000141104	0.00186308	Significantly downregulated (Adj-P<0.01)
ENSG00000164574.15_GALNT10	GALNT10	0.21611	2.90446	3.84559	0.000168876	0.00213778	Significantly upregulated (Adj-P<0.01)
ENSG00000146083.11_RNF44	RNF44	0.154284	3.79738	3.87717	0.000149937	0.00195154	Significantly upregulated (Adj-P<0.01)
ENSG00000188021.8_UBQLN2	UBQLN2	-0.126042	5.2223	-3.89053	0.00014255	0.00187876	Significantly downregulated (Adj-P<0.01)
ENSG00000113269.13_RNF130	RNF130	0.174339	4.78245	3.88829	0.000143762	0.00188998	Significantly upregulated (Adj-P<0.01)
ENSG00000256683.6_ZNF350	ZNF350	-0.212226	1.56533	-3.7772	0.000217959	0.00257628	Significantly downregulated (Adj-P<0.01)
ENSG00000105248.15_YJU2	YJU2	-0.205044	2.92032	-3.84341	0.000170264	0.00215238	Significantly downregulated (Adj-P<0.01)
ENSG00000175544.13_CABP4	CABP4	0.465575	-0.700134	3.71335	0.000275731	0.0031002	Significantly upregulated (Adj-P<0.01)
ENSG00000136425.13_CIB2	CIB2	0.459353	1.71502	3.79142	0.000206757	0.00249268	Significantly upregulated (Adj-P<0.01)
ENSG00000285791.1_AC009879.3	AC009879.3	-0.371453	2.17885	-3.79866	0.000201263	0.00245043	Significantly downregulated (Adj-P<0.01)
ENSG00000111348.8_ARHGDIB	ARHGDIB	0.283815	3.45801	3.85853	0.000160854	0.00205949	Significantly upregulated (Adj-P<0.01)
ENSG00000183684.7_ALYREF	ALYREF	-0.217051	3.71655	-3.86077	0.000159508	0.00204726	Significantly downregulated (Adj-P<0.01)
ENSG00000162437.14_RAVER2	RAVER2	0.196502	4.91574	3.88129	0.000147623	0.00193104	Significantly upregulated (Adj-P<0.01)
ENSG00000204219.10_TCEA3	TCEA3	-0.164983	8.16151	-3.85949	0.000160277	0.00205377	Significantly downregulated (Adj-P<0.01)
ENSG00000160447.6_PKN3	PKN3	0.303622	1.73824	3.79097	0.000207098	0.00249375	Significantly upregulated (Adj-P<0.01)
ENSG00000255152.8_MSH5-SAPCD1	MSH5-SAPCD1	-0.37663	0.518553	-3.73514	0.000254557	0.0029191	Significantly downregulated (Adj-P<0.01)
ENSG00000113649.11_TCERG1	TCERG1	-0.179327	5.39162	-3.87661	0.000150257	0.00195247	Significantly downregulated (Adj-P<0.01)
ENSG00000102172.15_SMS	SMS	0.214975	4.32487	3.86888	0.000154704	0.00199444	Significantly upregulated (Adj-P<0.01)
ENSG00000166394.14_CYB5R2	CYB5R2	-0.246398	1.86151	-3.78226	0.000213908	0.00255534	Significantly downregulated (Adj-P<0.01)
ENSG00000166681.13_BEX3	BEX3	0.303218	1.83783	3.79089	0.000207164	0.00249375	Significantly upregulated (Adj-P<0.01)
ENSG00000177098.8_SCN4B	SCN4B	0.37522	4.37297	3.86879	0.000154757	0.00199444	Significantly upregulated (Adj-P<0.01)
ENSG00000127083.7_OMD	OMD	0.697157	-0.809841	3.69283	0.000297178	0.00329435	Significantly upregulated (Adj-P<0.01)
ENSG00000149532.15_CPSF7	CPSF7	-0.155882	5.96627	-3.86809	0.000155168	0.00199809	Significantly downregulated (Adj-P<0.01)
ENSG00000065029.14_ZNF76	ZNF76	-0.156721	5.49646	-3.8691	0.000154575	0.00199444	Significantly downregulated (Adj-P<0.01)
ENSG00000145604.15_SKP2	SKP2	0.233712	1.60184	3.76416	0.000228731	0.0026722	Significantly upregulated (Adj-P<0.01)
ENSG00000100983.10_GSS	GSS	-0.160401	3.7482	-3.85141	0.000165227	0.00209835	Significantly downregulated (Adj-P<0.01)
ENSG00000117318.8_ID3	ID3	0.331163	3.10045	3.836	0.000175062	0.00219309	Significantly upregulated (Adj-P<0.01)
ENSG00000248441.6_LINC01197	LINC01197	0.535358	-1.21034	3.68693	0.000303633	0.00334465	Significantly upregulated (Adj-P<0.01)
ENSG00000112139.15_MDGA1	MDGA1	0.381986	1.06042	3.75036	0.00024069	0.00278827	Significantly upregulated (Adj-P<0.01)
ENSG00000176971.3_FIBIN	FIBIN	-0.43543	1.33932	-3.74741	0.000243319	0.00281044	Significantly downregulated (Adj-P<0.01)
ENSG00000162383.12_SLC1A7	SLC1A7	0.459469	2.50303	3.81286	0.000190888	0.00235009	Significantly upregulated (Adj-P<0.01)
ENSG00000104774.12_MAN2B1	MAN2B1	0.230778	3.45716	3.84103	0.00017179	0.00216419	Significantly upregulated (Adj-P<0.01)
ENSG00000132530.16_XAF1	XAF1	0.449359	3.37906	3.83472	0.000175908	0.00219832	Significantly upregulated (Adj-P<0.01)
ENSG00000047617.14_ANO2	ANO2	0.419732	-0.335729	3.69323	0.000296749	0.00329425	Significantly upregulated (Adj-P<0.01)
ENSG00000119812.18_FAM98A	FAM98A	-0.12954	5.29296	-3.86388	0.000157647	0.00202503	Significantly downregulated (Adj-P<0.01)
ENSG00000117122.13_MFAP2	MFAP2	0.609707	-1.04848	3.68417	0.000306698	0.00336895	Significantly upregulated (Adj-P<0.01)
ENSG00000250673.2_REELD1	REELD1	-0.697301	-1.57332	-3.68429	0.000306563	0.00336895	Significantly downregulated (Adj-P<0.01)
ENSG00000100483.13_VCPKMT	VCPKMT	-0.226966	2.18514	-3.77927	0.000216287	0.00257201	Significantly downregulated (Adj-P<0.01)
ENSG00000214548.16_MEG3	MEG3	0.281495	6.74818	3.85256	0.000164508	0.002094	Significantly upregulated (Adj-P<0.01)
ENSG00000166407.13_LMO1	LMO1	0.301898	3.52627	3.83707	0.000174359	0.00218953	Significantly upregulated (Adj-P<0.01)
ENSG00000087087.19_SRRT	SRRT	-0.143381	4.99516	-3.856	0.000162395	0.00207351	Significantly downregulated (Adj-P<0.01)
ENSG00000111361.12_EIF2B1	EIF2B1	-0.0999472	4.57678	-3.85261	0.000164479	0.002094	Significantly downregulated (Adj-P<0.01)
ENSG00000138768.14_USO1	USO1	-0.20084	8.29267	-3.83452	0.000176039	0.00219832	Significantly downregulated (Adj-P<0.01)
ENSG00000166997.7_CNPY4	CNPY4	0.286712	0.933059	3.72985	0.000259551	0.00295634	Significantly upregulated (Adj-P<0.01)
ENSG00000152944.8_MED21	MED21	-0.177234	3.80573	-3.8349	0.000175789	0.00219832	Significantly downregulated (Adj-P<0.01)
ENSG00000168246.5_UBTD2	UBTD2	0.166496	2.99661	3.80706	0.000195065	0.00239401	Significantly upregulated (Adj-P<0.01)
ENSG00000178031.16_ADAMTSL1	ADAMTSL1	0.651312	-1.17223	3.67126	0.000321425	0.00348384	Significantly upregulated (Adj-P<0.01)
ENSG00000141012.12_GALNS	GALNS	0.224937	1.77171	3.76227	0.000230335	0.00268417	Significantly upregulated (Adj-P<0.01)
ENSG00000091986.15_CCDC80	CCDC80	0.65255	4.05146	3.84162	0.000171413	0.00216168	Significantly upregulated (Adj-P<0.01)
ENSG00000116990.10_MYCL	MYCL	0.947786	-1.73619	3.67023	0.000322627	0.00348779	Significantly upregulated (Adj-P<0.01)
ENSG00000203644.3_AC083799.1	AC083799.1	0.370028	-0.695744	3.66791	0.000325362	0.00351494	Significantly upregulated (Adj-P<0.01)
ENSG00000161649.12_CD300LG	CD300LG	0.389037	3.00854	3.80543	0.00019625	0.00240667	Significantly upregulated (Adj-P<0.01)
ENSG00000213203.2_GIMAP1	GIMAP1	0.291822	2.51168	3.78729	0.000209953	0.00252039	Significantly upregulated (Adj-P<0.01)
ENSG00000242265.5_PEG10	PEG10	0.438508	2.08014	3.76993	0.0002239	0.00263263	Significantly upregulated (Adj-P<0.01)
ENSG00000280138.1_AC027290.2	AC027290.2	0.357324	1.02212	3.71365	0.000275428	0.00309921	Significantly upregulated (Adj-P<0.01)
ENSG00000132604.10_TERF2	TERF2	-0.102676	4.2785	-3.83633	0.000174844	0.00219211	Significantly downregulated (Adj-P<0.01)
ENSG00000126814.6_TRMT5	TRMT5	-0.15916	2.92007	-3.79271	0.000205767	0.00248796	Significantly downregulated (Adj-P<0.01)
ENSG00000179639.10_FCER1A	FCER1A	0.836931	-1.80264	3.66422	0.000329732	0.0035475	Significantly upregulated (Adj-P<0.01)
ENSG00000136383.6_ALPK3	ALPK3	-0.292001	9.27411	-3.80891	0.000193724	0.0023794	Significantly downregulated (Adj-P<0.01)
ENSG00000140853.15_NLRC5	NLRC5	0.433684	2.99887	3.80957	0.000193246	0.0023754	Significantly upregulated (Adj-P<0.01)
ENSG00000131473.16_ACLY	ACLY	0.19173	3.57385	3.82014	0.000185768	0.00229788	Significantly upregulated (Adj-P<0.01)
ENSG00000067365.14_METTL22	METTL22	0.175609	4.62183	3.84077	0.000171961	0.00216461	Significantly upregulated (Adj-P<0.01)
ENSG00000169217.8_CD2BP2	CD2BP2	-0.170255	4.85829	-3.84156	0.000171452	0.00216168	Significantly downregulated (Adj-P<0.01)
ENSG00000037280.15_FLT4	FLT4	0.301805	2.59092	3.78399	0.000212534	0.00254667	Significantly upregulated (Adj-P<0.01)
ENSG00000138443.15_ABI2	ABI2	0.186349	4.21085	3.82992	0.000179093	0.00222583	Significantly upregulated (Adj-P<0.01)
ENSG00000203697.11_CAPN8	CAPN8	-0.979067	-2.0305	-3.67357	0.000318746	0.00346253	Significantly downregulated (Adj-P<0.01)
ENSG00000177663.13_IL17RA	IL17RA	0.322492	1.57086	3.73458	0.000255074	0.00292255	Significantly upregulated (Adj-P<0.01)
ENSG00000205678.7_TECRL	TECRL	-0.414141	5.79491	-3.83772	0.000173937	0.00218598	Significantly downregulated (Adj-P<0.01)
ENSG00000146670.9_CDCA5	CDCA5	0.441201	-1.2254	3.65241	0.000344132	0.00365064	Significantly upregulated (Adj-P<0.01)
ENSG00000139173.9_TMEM117	TMEM117	0.220526	1.54728	3.72796	0.000261356	0.00297283	Significantly upregulated (Adj-P<0.01)
ENSG00000184619.5_KRBA2	KRBA2	0.250824	2.78478	3.77854	0.000216874	0.00257438	Significantly upregulated (Adj-P<0.01)
ENSG00000147065.16_MSN	MSN	0.273628	5.17927	3.8349	0.000175784	0.00219832	Significantly upregulated (Adj-P<0.01)
ENSG00000187068.2_C3orf70	C3orf70	0.466946	-0.510379	3.65448	0.00034157	0.00363764	Significantly upregulated (Adj-P<0.01)
ENSG00000143569.18_UBAP2L	UBAP2L	-0.108094	5.617	-3.83412	0.0001763	0.00219982	Significantly downregulated (Adj-P<0.01)
ENSG00000118308.15_LRMP	LRMP	0.421027	-0.681631	3.65213	0.000344481	0.00365112	Significantly upregulated (Adj-P<0.01)
ENSG00000127824.13_TUBA4A	TUBA4A	-0.300414	7.41893	-3.81909	0.000186496	0.00230325	Significantly downregulated (Adj-P<0.01)
ENSG00000008838.19_MED24	MED24	-0.123802	6.12275	-3.82953	0.000179357	0.00222735	Significantly downregulated (Adj-P<0.01)
ENSG00000136811.16_ODF2	ODF2	0.257996	1.4878	3.72267	0.000266475	0.00302012	Significantly upregulated (Adj-P<0.01)
ENSG00000102034.16_ELF4	ELF4	0.381576	0.501594	3.68363	0.000307298	0.00337319	Significantly upregulated (Adj-P<0.01)
ENSG00000230724.9_LINC01001	LINC01001	-0.273567	1.90699	-3.74024	0.00024982	0.00287284	Significantly downregulated (Adj-P<0.01)
ENSG00000185420.18_SMYD3	SMYD3	0.173465	2.10943	3.74892	0.000241963	0.00280095	Significantly upregulated (Adj-P<0.01)
ENSG00000001497.16_LAS1L	LAS1L	-0.126862	4.00541	-3.8165	0.000188311	0.00232384	Significantly downregulated (Adj-P<0.01)
ENSG00000169727.12_GPS1	GPS1	-0.142702	6.09055	-3.82585	0.000181846	0.00225291	Significantly downregulated (Adj-P<0.01)
ENSG00000185418.15_TARSL2	TARSL2	-0.162958	5.80687	-3.82829	0.00018019	0.00223593	Significantly downregulated (Adj-P<0.01)
ENSG00000170545.16_SMAGP	SMAGP	0.361711	-0.534873	3.64853	0.000348995	0.00368404	Significantly upregulated (Adj-P<0.01)
ENSG00000140400.16_MAN2C1	MAN2C1	-0.175437	6.22641	-3.82142	0.00018488	0.00228869	Significantly downregulated (Adj-P<0.01)
ENSG00000187942.11_LDLRAD2	LDLRAD2	0.400251	0.509874	3.68776	0.000302718	0.00334171	Significantly upregulated (Adj-P<0.01)
ENSG00000262855.1_AC012146.4	AC012146.4	-0.535291	-0.127139	-3.65333	0.00034299	0.00364665	Significantly downregulated (Adj-P<0.01)
ENSG00000129245.11_FXR2	FXR2	-0.15057	6.61566	-3.81342	0.000190492	0.00234869	Significantly downregulated (Adj-P<0.01)
ENSG00000162604.12_TM2D1	TM2D1	-0.121618	3.60452	-3.79243	0.000205978	0.00248796	Significantly downregulated (Adj-P<0.01)
ENSG00000162522.10_KIAA1522	KIAA1522	0.233296	1.87958	3.73215	0.000257361	0.00294017	Significantly upregulated (Adj-P<0.01)
ENSG00000197599.12_CCDC154	CCDC154	-0.438824	-0.384375	-3.64069	0.000359007	0.0037745	Significantly downregulated (Adj-P<0.01)
ENSG00000255585.3_AL590627.1	AL590627.1	0.368583	-0.156586	3.65179	0.000344906	0.00365317	Significantly upregulated (Adj-P<0.01)
ENSG00000136643.11_RPS6KC1	RPS6KC1	0.154045	3.9136	3.79792	0.000201818	0.00245386	Significantly upregulated (Adj-P<0.01)
ENSG00000185947.14_ZNF267	ZNF267	-0.263612	1.81274	-3.7077	0.000281482	0.00314927	Significantly downregulated (Adj-P<0.01)
ENSG00000112297.14_CRYBG1	CRYBG1	0.349953	1.19442	3.69431	0.00029558	0.00328371	Significantly upregulated (Adj-P<0.01)
ENSG00000170382.11_LRRN2	LRRN2	0.297259	0.891354	3.68191	0.00030923	0.00338728	Significantly upregulated (Adj-P<0.01)
ENSG00000170915.8_PAQR8	PAQR8	0.408815	-0.402454	3.63392	0.000367874	0.00384968	Significantly upregulated (Adj-P<0.01)
ENSG00000101882.9_NKAP	NKAP	-0.12936	4.11123	-3.79876	0.000201186	0.00245043	Significantly downregulated (Adj-P<0.01)
ENSG00000153774.8_CFDP1	CFDP1	-0.144107	3.32059	-3.77697	0.000218141	0.00257649	Significantly downregulated (Adj-P<0.01)
ENSG00000267100.1_ILF3-DT	ILF3-DT	-0.190445	4.47089	-3.80516	0.000196446	0.00240719	Significantly downregulated (Adj-P<0.01)
ENSG00000088280.18_ASAP3	ASAP3	-0.265287	4.46477	-3.80287	0.00019813	0.00242215	Significantly downregulated (Adj-P<0.01)
ENSG00000188599.17_NPIPP1	NPIPP1	-0.243579	3.20363	-3.76677	0.000226532	0.00265562	Significantly downregulated (Adj-P<0.01)
ENSG00000124374.8_PAIP2B	PAIP2B	-0.353224	7.06948	-3.79988	0.000200347	0.00244355	Significantly downregulated (Adj-P<0.01)
ENSG00000182923.17_CEP63	CEP63	-0.136886	4.81371	-3.804	0.000197301	0.00241578	Significantly downregulated (Adj-P<0.01)
ENSG00000205413.7_SAMD9	SAMD9	0.46483	0.463174	3.64974	0.000347474	0.00367293	Significantly upregulated (Adj-P<0.01)
ENSG00000182670.13_TTC3	TTC3	-0.166226	6.67878	-3.80018	0.000200129	0.00244279	Significantly downregulated (Adj-P<0.01)
ENSG00000145362.17_ANK2	ANK2	0.199945	6.98458	3.7927	0.000205775	0.00248796	Significantly upregulated (Adj-P<0.01)
ENSG00000165916.8_PSMC3	PSMC3	-0.168299	6.5836	-3.795	0.000204016	0.00247675	Significantly downregulated (Adj-P<0.01)
ENSG00000171056.7_SOX7	SOX7	0.260747	2.68102	3.74438	0.000246046	0.00283776	Significantly upregulated (Adj-P<0.01)
ENSG00000157216.15_SSBP3	SSBP3	-0.211777	4.42468	-3.79375	0.000204971	0.0024845	Significantly downregulated (Adj-P<0.01)
ENSG00000152117.17_AC073869.1	AC073869.1	-0.249983	4.26359	-3.79194	0.000206356	0.00248975	Significantly downregulated (Adj-P<0.01)
ENSG00000150722.10_PPP1R1C	PPP1R1C	-0.538927	1.66437	-3.68478	0.000306021	0.00336623	Significantly downregulated (Adj-P<0.01)
ENSG00000104946.12_TBC1D17	TBC1D17	-0.162935	6.14714	-3.79438	0.000204489	0.00248058	Significantly downregulated (Adj-P<0.01)
ENSG00000149260.16_CAPN5	CAPN5	0.354641	0.77499	3.66449	0.000329421	0.0035475	Significantly upregulated (Adj-P<0.01)
ENSG00000088832.16_FKBP1A	FKBP1A	0.12168	5.31951	3.79631	0.000203031	0.0024667	Significantly upregulated (Adj-P<0.01)
ENSG00000217165.1_ANKRD18EP	ANKRD18EP	-0.355068	-0.0240979	-3.62116	0.00038514	0.00396765	Significantly downregulated (Adj-P<0.01)
ENSG00000091732.16_ZC3HC1	ZC3HC1	-0.124031	3.98236	-3.78238	0.000213808	0.00255534	Significantly downregulated (Adj-P<0.01)
ENSG00000112855.15_HARS2	HARS2	-0.125487	4.66378	-3.79234	0.000206049	0.00248796	Significantly downregulated (Adj-P<0.01)
ENSG00000165782.10_PIP4P1	PIP4P1	-0.160573	3.90832	-3.7811	0.000214828	0.00256048	Significantly downregulated (Adj-P<0.01)
ENSG00000072201.13_LNX1	LNX1	0.314209	1.42987	3.67581	0.000316163	0.00344162	Significantly upregulated (Adj-P<0.01)
ENSG00000205795.4_CYS1	CYS1	0.552917	-0.0170587	3.63252	0.000369734	0.0038566	Significantly upregulated (Adj-P<0.01)
ENSG00000168404.12_MLKL	MLKL	0.383921	0.34796	3.63362	0.000368273	0.00385129	Significantly upregulated (Adj-P<0.01)
ENSG00000260805.2_AC092803.2	AC092803.2	0.454118	-0.0751679	3.6322	0.000370151	0.00385808	Significantly upregulated (Adj-P<0.01)
ENSG00000079246.15_XRCC5	XRCC5	-0.116275	6.41312	-3.78775	0.000209594	0.00252039	Significantly downregulated (Adj-P<0.01)
ENSG00000165949.12_IFI27	IFI27	0.365539	3.45773	3.76963	0.000224149	0.00263359	Significantly upregulated (Adj-P<0.01)
ENSG00000226950.6_DANCR	DANCR	0.205338	4.08204	3.77777	0.000217496	0.00257481	Significantly upregulated (Adj-P<0.01)
ENSG00000243678.11_NME2	NME2	0.250864	6.38898	3.78048	0.000215323	0.00256443	Significantly upregulated (Adj-P<0.01)
ENSG00000101844.17_ATG4A	ATG4A	-0.151093	3.87806	-3.76868	0.000224942	0.00264092	Significantly downregulated (Adj-P<0.01)
ENSG00000118898.15_PPL	PPL	-0.370729	3.43272	-3.75366	0.000237771	0.00275853	Significantly downregulated (Adj-P<0.01)
ENSG00000168067.11_MAP4K2	MAP4K2	0.214528	2.18576	3.70987	0.000279264	0.00313115	Significantly upregulated (Adj-P<0.01)
ENSG00000169169.14_CPT1C	CPT1C	0.478662	-1.41349	3.59422	0.000424155	0.0042789	Significantly upregulated (Adj-P<0.01)
ENSG00000115816.14_CEBPZ	CEBPZ	-0.160046	4.94557	-3.78264	0.000213601	0.00255534	Significantly downregulated (Adj-P<0.01)
ENSG00000154175.16_ABI3BP	ABI3BP	0.415359	2.82776	3.73661	0.000253177	0.00290718	Significantly upregulated (Adj-P<0.01)
ENSG00000186377.7_CYP4X1	CYP4X1	-0.318144	1.58118	-3.67779	0.000313893	0.00342403	Significantly downregulated (Adj-P<0.01)
ENSG00000107738.19_VSIR	VSIR	0.293528	3.37718	3.75758	0.000234363	0.00272302	Significantly upregulated (Adj-P<0.01)
ENSG00000100353.17_EIF3D	EIF3D	-0.106428	5.57072	-3.78131	0.000214663	0.00256046	Significantly downregulated (Adj-P<0.01)
ENSG00000206561.12_COLQ	COLQ	-0.464761	3.54906	-3.75593	0.000235791	0.00273759	Significantly downregulated (Adj-P<0.01)
ENSG00000241769.7_LINC00893	LINC00893	-0.279777	1.31899	-3.66254	0.000331751	0.00356171	Significantly downregulated (Adj-P<0.01)
ENSG00000176986.15_SEC24C	SEC24C	-0.0903654	5.56538	-3.77972	0.000215926	0.00256967	Significantly downregulated (Adj-P<0.01)
ENSG00000188976.10_NOC2L	NOC2L	-0.161576	5.80426	-3.77827	0.000217097	0.00257438	Significantly downregulated (Adj-P<0.01)
ENSG00000103507.13_BCKDK	BCKDK	0.205479	5.56033	3.77821	0.000217142	0.00257438	Significantly upregulated (Adj-P<0.01)
ENSG00000035862.12_TIMP2	TIMP2	0.345612	5.07676	3.77744	0.000217759	0.00257586	Significantly upregulated (Adj-P<0.01)
ENSG00000044090.8_CUL7	CUL7	0.149124	4.6729	3.77433	0.000220287	0.00259793	Significantly upregulated (Adj-P<0.01)
ENSG00000091972.18_CD200	CD200	0.473443	-0.764647	3.58714	0.000435011	0.00436596	Significantly upregulated (Adj-P<0.01)
ENSG00000175193.13_PARL	PARL	-0.11662	4.35188	-3.76843	0.000225147	0.00264135	Significantly downregulated (Adj-P<0.01)
ENSG00000162736.16_NCSTN	NCSTN	-0.116873	4.96088	-3.77512	0.000219641	0.00259226	Significantly downregulated (Adj-P<0.01)
ENSG00000173726.10_TOMM20	TOMM20	-0.0861601	6.50636	-3.77106	0.000222966	0.00262558	Significantly downregulated (Adj-P<0.01)
ENSG00000131100.12_ATP6V1E1	ATP6V1E1	-0.110599	5.96119	-3.77354	0.000220934	0.00260361	Significantly downregulated (Adj-P<0.01)
ENSG00000124019.9_FAM124B	FAM124B	0.640886	-1.33127	3.58195	0.00044313	0.00443558	Significantly upregulated (Adj-P<0.01)
ENSG00000160867.14_FGFR4	FGFR4	0.310702	2.42772	3.71879	0.00027029	0.00305894	Significantly upregulated (Adj-P<0.01)
ENSG00000189369.8_GSPT2	GSPT2	-0.18827	2.45183	-3.69758	0.000292076	0.00325388	Significantly downregulated (Adj-P<0.01)
ENSG00000173226.16_IQCB1	IQCB1	-0.174341	2.49731	-3.70115	0.000288302	0.00321869	Significantly downregulated (Adj-P<0.01)
ENSG00000110900.14_TSPAN11	TSPAN11	0.823797	-1.63002	3.57972	0.000446667	0.00446297	Significantly upregulated (Adj-P<0.01)
ENSG00000283828.1_AL137002.2	AL137002.2	0.350575	0.981233	3.64641	0.000351672	0.00370235	Significantly upregulated (Adj-P<0.01)
ENSG00000118729.11_CASQ2	CASQ2	-0.337228	7.20363	-3.76003	0.000232247	0.00270244	Significantly downregulated (Adj-P<0.01)
ENSG00000248429.5_FAM198B-AS1	FAM198B-AS1	0.449514	-0.580806	3.5849	0.000438497	0.00439814	Significantly upregulated (Adj-P<0.01)
ENSG00000162702.7_ZNF281	ZNF281	-0.201739	3.49067	-3.73124	0.000258225	0.0029479	Significantly downregulated (Adj-P<0.01)
ENSG00000172986.12_GXYLT2	GXYLT2	0.542574	-0.849711	3.57771	0.000449869	0.00449211	Significantly upregulated (Adj-P<0.01)
ENSG00000173269.13_MMRN2	MMRN2	0.27016	4.29736	3.76252	0.000230125	0.00268371	Significantly upregulated (Adj-P<0.01)
ENSG00000141219.15_C17orf80	C17orf80	-0.109948	4.70092	-3.76651	0.000226758	0.00265628	Significantly downregulated (Adj-P<0.01)
ENSG00000130023.15_ERMARD	ERMARD	-0.148559	3.3072	-3.73402	0.000255605	0.0029265	Significantly downregulated (Adj-P<0.01)
ENSG00000071575.11_TRIB2	TRIB2	0.206607	3.37567	3.7375	0.000252354	0.00289985	Significantly upregulated (Adj-P<0.01)
ENSG00000144840.9_RABL3	RABL3	-0.175152	4.02733	-3.75036	0.000240689	0.00278827	Significantly downregulated (Adj-P<0.01)
ENSG00000107929.14_LARP4B	LARP4B	-0.133287	6.52525	-3.76118	0.000231266	0.00269302	Significantly downregulated (Adj-P<0.01)
ENSG00000102699.5_PARP4	PARP4	0.251698	3.16105	3.72748	0.000261819	0.00297594	Significantly upregulated (Adj-P<0.01)
ENSG00000152049.6_KCNE4	KCNE4	0.405527	0.152492	3.5986	0.000417562	0.00422596	Significantly upregulated (Adj-P<0.01)
ENSG00000175606.10_TMEM70	TMEM70	0.641587	5.51565	3.76449	0.00022845	0.00267212	Significantly upregulated (Adj-P<0.01)
ENSG00000134285.10_FKBP11	FKBP11	0.278894	0.726367	3.62152	0.000384652	0.00396707	Significantly upregulated (Adj-P<0.01)
ENSG00000166913.12_YWHAB	YWHAB	-0.113059	5.86132	-3.76493	0.000228086	0.00266984	Significantly downregulated (Adj-P<0.01)
ENSG00000133401.15_PDZD2	PDZD2	0.355194	3.24095	3.72504	0.000264168	0.00299613	Significantly upregulated (Adj-P<0.01)
ENSG00000189134.3_NKAPL	NKAPL	-0.212694	1.78689	-3.64996	0.000347198	0.00367248	Significantly downregulated (Adj-P<0.01)
ENSG00000277399.4_GPR179	GPR179	-0.365214	0.556529	-3.60642	0.000406043	0.00414412	Significantly downregulated (Adj-P<0.01)
ENSG00000169635.9_HIC2	HIC2	-0.270543	1.86706	-3.6655	0.000328216	0.00354089	Significantly downregulated (Adj-P<0.01)
ENSG00000240045.1_DWORF	DWORF	-0.343851	8.12862	-3.74099	0.000249136	0.00286707	Significantly downregulated (Adj-P<0.01)
ENSG00000167130.17_DOLPP1	DOLPP1	-0.217541	1.86948	-3.66435	0.00032958	0.0035475	Significantly downregulated (Adj-P<0.01)
ENSG00000203808.11_BVES-AS1	BVES-AS1	-0.216735	1.97756	-3.66575	0.00032792	0.00354014	Significantly downregulated (Adj-P<0.01)
ENSG00000132793.11_LPIN3	LPIN3	0.265726	1.55583	3.65653	0.000339044	0.00361718	Significantly upregulated (Adj-P<0.01)
ENSG00000081248.10_CACNA1S	CACNA1S	-0.173307	9.1368	-3.71777	0.000271298	0.00306371	Significantly downregulated (Adj-P<0.01)
ENSG00000229320.3_KRT8P12	KRT8P12	0.230861	2.14697	3.67135	0.00032132	0.00348384	Significantly upregulated (Adj-P<0.01)
ENSG00000130305.16_NSUN5	NSUN5	-0.175546	4.27572	-3.74366	0.000246703	0.00284325	Significantly downregulated (Adj-P<0.01)
ENSG00000101152.10_DNAJC5	DNAJC5	-0.125777	4.77236	-3.74854	0.000242303	0.00280282	Significantly downregulated (Adj-P<0.01)
ENSG00000185112.5_FAM43A	FAM43A	0.297673	2.27809	3.67875	0.000312803	0.00341451	Significantly upregulated (Adj-P<0.01)
ENSG00000168530.15_MYL1	MYL1	0.260324	12.0438	3.67112	0.000321596	0.00348384	Significantly upregulated (Adj-P<0.01)
ENSG00000173085.14_COQ2	COQ2	0.201509	4.43132	3.74275	0.000247524	0.00285061	Significantly upregulated (Adj-P<0.01)
ENSG00000226137.5_BAIAP2-DT	BAIAP2-DT	0.314699	0.482169	3.60304	0.000410995	0.00418107	Significantly upregulated (Adj-P<0.01)
ENSG00000120278.16_PLEKHG1	PLEKHG1	0.399682	1.80891	3.64908	0.000348295	0.00367913	Significantly upregulated (Adj-P<0.01)
ENSG00000076641.4_PAG1	PAG1	0.332473	1.53067	3.63069	0.00037218	0.0038696	Significantly upregulated (Adj-P<0.01)
ENSG00000180901.10_KCTD2	KCTD2	-0.145867	5.20652	-3.74481	0.000245653	0.00283531	Significantly downregulated (Adj-P<0.01)
ENSG00000172243.17_CLEC7A	CLEC7A	0.847935	-1.0046	3.54786	0.000500127	0.00488518	Significantly upregulated (Adj-P<0.01)
ENSG00000153214.10_TMEM87B	TMEM87B	0.238253	1.71345	3.63931	0.000360799	0.00379081	Significantly upregulated (Adj-P<0.01)
ENSG00000154529.14_CNTNAP3B	CNTNAP3B	0.399262	1.67145	3.63448	0.000367127	0.00384443	Significantly upregulated (Adj-P<0.01)
ENSG00000175084.11_DES	DES	-0.182617	13.2162	-3.64774	0.000349992	0.0036896	Significantly downregulated (Adj-P<0.01)
ENSG00000076604.14_TRAF4	TRAF4	0.458567	-0.918562	3.54861	0.000498807	0.00487532	Significantly upregulated (Adj-P<0.01)
ENSG00000137218.10_FRS3	FRS3	-0.184724	2.66804	-3.68749	0.000303016	0.00334171	Significantly downregulated (Adj-P<0.01)
ENSG00000244005.12_NFS1	NFS1	0.154285	4.32329	3.73277	0.00025678	0.00293568	Significantly upregulated (Adj-P<0.01)
ENSG00000253251.2_SHLD3	SHLD3	-0.344212	-0.0322522	-3.5588	0.000481132	0.00474343	Significantly downregulated (Adj-P<0.01)
ENSG00000167685.14_ZNF444	ZNF444	-0.16284	3.99046	-3.72565	0.000263578	0.00299161	Significantly downregulated (Adj-P<0.01)
ENSG00000182087.13_TMEM259	TMEM259	-0.193462	6.4499	-3.72986	0.000259539	0.00295634	Significantly downregulated (Adj-P<0.01)
ENSG00000100379.17_KCTD17	KCTD17	0.428365	-0.443668	3.55865	0.000481384	0.00474343	Significantly upregulated (Adj-P<0.01)
ENSG00000136450.12_SRSF1	SRSF1	-0.129705	5.86654	-3.7351	0.000254587	0.0029191	Significantly downregulated (Adj-P<0.01)
ENSG00000198075.9_SULT1C4	SULT1C4	0.423052	-0.576356	3.54292	0.000508929	0.00494158	Significantly upregulated (Adj-P<0.01)
ENSG00000170190.15_SLC16A5	SLC16A5	0.278918	2.04527	3.6564	0.000339204	0.00361718	Significantly upregulated (Adj-P<0.01)
ENSG00000176108.9_CHMP6	CHMP6	-0.192699	4.52662	-3.7309	0.000258552	0.00294949	Significantly downregulated (Adj-P<0.01)
ENSG00000126767.17_ELK1	ELK1	0.170986	3.83679	3.71805	0.000271028	0.00306371	Significantly upregulated (Adj-P<0.01)
ENSG00000197122.11_SRC	SRC	0.388961	0.446782	3.5818	0.00044336	0.00443558	Significantly upregulated (Adj-P<0.01)
ENSG00000066136.20_NFYC	NFYC	-0.111311	5.18959	-3.72967	0.000259718	0.00295634	Significantly downregulated (Adj-P<0.01)
ENSG00000172399.5_MYOZ2	MYOZ2	-0.413319	7.76045	-3.71317	0.000275912	0.0031002	Significantly downregulated (Adj-P<0.01)
ENSG00000105711.11_SCN1B	SCN1B	-0.190786	7.77548	-3.70898	0.000280166	0.00313678	Significantly downregulated (Adj-P<0.01)
ENSG00000169410.9_PTPN9	PTPN9	0.208805	1.96479	3.63513	0.000366271	0.00383803	Significantly upregulated (Adj-P<0.01)
ENSG00000115365.11_LANCL1	LANCL1	0.161874	5.4923	3.72715	0.000262131	0.00297733	Significantly upregulated (Adj-P<0.01)
ENSG00000257108.1_NHLRC4	NHLRC4	0.497686	-1.52782	3.52738	0.000537622	0.00517416	Significantly upregulated (Adj-P<0.01)
ENSG00000282556.2_AC068733.3	AC068733.3	0.473946	-0.32722	3.54286	0.000509049	0.00494158	Significantly upregulated (Adj-P<0.01)
ENSG00000137312.14_FLOT1	FLOT1	0.153869	6.77995	3.71404	0.000275032	0.00309697	Significantly upregulated (Adj-P<0.01)
ENSG00000169758.12_TMEM266	TMEM266	-0.356306	3.11619	-3.68032	0.000311029	0.00340224	Significantly downregulated (Adj-P<0.01)
ENSG00000135821.18_GLUL	GLUL	-0.376854	9.16312	-3.68645	0.000304163	0.00334813	Significantly downregulated (Adj-P<0.01)
ENSG00000105270.14_CLIP3	CLIP3	0.322953	0.482658	3.56752	0.000466473	0.00462846	Significantly upregulated (Adj-P<0.01)
ENSG00000205138.3_SDHAF1	SDHAF1	-0.211897	2.5205	-3.65962	0.000335276	0.00358918	Significantly downregulated (Adj-P<0.01)
ENSG00000127463.14_EMC1	EMC1	-0.126867	5.05539	-3.72051	0.000268597	0.00304196	Significantly downregulated (Adj-P<0.01)
ENSG00000054277.13_OPN3	OPN3	0.326034	1.34276	3.59911	0.000416813	0.00422111	Significantly upregulated (Adj-P<0.01)
ENSG00000106948.16_AKNA	AKNA	0.424526	1.47294	3.61452	0.000394435	0.0040441	Significantly upregulated (Adj-P<0.01)
ENSG00000118363.11_SPCS2	SPCS2	-0.113836	4.96008	-3.71785	0.000271221	0.00306371	Significantly downregulated (Adj-P<0.01)
ENSG00000128242.12_GAL3ST1	GAL3ST1	-0.432575	-0.590112	-3.5265	0.000539278	0.00518026	Significantly downregulated (Adj-P<0.01)
ENSG00000132326.11_PER2	PER2	-0.277658	4.75244	-3.71433	0.000274741	0.00309591	Significantly downregulated (Adj-P<0.01)
ENSG00000130775.15_THEMIS2	THEMIS2	0.533185	0.210331	3.551	0.000494608	0.00484031	Significantly upregulated (Adj-P<0.01)
ENSG00000281571.2_AC241585.2	AC241585.2	0.661803	-1.24963	3.51944	0.000552839	0.00526892	Significantly upregulated (Adj-P<0.01)
ENSG00000138069.17_RAB1A	RAB1A	-0.0963825	5.09564	-3.71493	0.000274138	0.00309134	Significantly downregulated (Adj-P<0.01)
ENSG00000267221.2_C17orf113	C17orf113	-0.246599	1.07316	-3.58231	0.000442558	0.0044332	Significantly downregulated (Adj-P<0.01)
ENSG00000138641.16_HERC3	HERC3	-0.209346	4.89895	-3.71034	0.000278776	0.00312884	Significantly downregulated (Adj-P<0.01)
ENSG00000198270.12_TMEM116	TMEM116	-0.165679	2.12165	-3.62505	0.000379802	0.00393255	Significantly downregulated (Adj-P<0.01)
ENSG00000176148.15_TCP11L1	TCP11L1	0.252386	1.44278	3.59178	0.00042786	0.00431073	Significantly upregulated (Adj-P<0.01)
ENSG00000107949.16_BCCIP	BCCIP	-0.109899	4.92257	-3.71026	0.000278859	0.00312884	Significantly downregulated (Adj-P<0.01)
ENSG00000148337.20_CIZ1	CIZ1	-0.121261	5.82355	-3.70935	0.000279788	0.00313478	Significantly downregulated (Adj-P<0.01)
ENSG00000187866.8_FAM122A	FAM122A	-0.112017	3.90208	-3.69298	0.000297024	0.00329435	Significantly downregulated (Adj-P<0.01)
ENSG00000080824.18_HSP90AA1	HSP90AA1	-0.193618	8.67845	-3.68273	0.000308307	0.00338183	Significantly downregulated (Adj-P<0.01)
ENSG00000139899.10_CBLN3	CBLN3	0.412249	-0.642276	3.52049	0.000550809	0.00525595	Significantly upregulated (Adj-P<0.01)
ENSG00000125148.6_MT2A	MT2A	0.507912	4.49336	3.70528	0.000283984	0.00317273	Significantly upregulated (Adj-P<0.01)
ENSG00000173039.18_RELA	RELA	-0.12175	4.72093	-3.70559	0.000283666	0.00317144	Significantly downregulated (Adj-P<0.01)
ENSG00000135299.16_ANKRD6	ANKRD6	0.216825	2.15901	3.62314	0.00038242	0.00394924	Significantly upregulated (Adj-P<0.01)
ENSG00000269113.3_TRABD2B	TRABD2B	0.472514	-0.670435	3.51432	0.000562881	0.00534192	Significantly upregulated (Adj-P<0.01)
ENSG00000172345.13_STARD5	STARD5	0.554994	-0.346233	3.52256	0.00054681	0.0052369	Significantly upregulated (Adj-P<0.01)
ENSG00000105122.12_RASAL3	RASAL3	0.537047	-0.371338	3.52768	0.000537038	0.00517171	Significantly upregulated (Adj-P<0.01)
ENSG00000196954.13_CASP4	CASP4	0.303588	1.87244	3.61233	0.000397544	0.00407061	Significantly upregulated (Adj-P<0.01)
ENSG00000145723.16_GIN1	GIN1	-0.175627	3.04957	-3.65374	0.000342484	0.00364472	Significantly downregulated (Adj-P<0.01)
ENSG00000114388.12_NPRL2	NPRL2	-0.123249	3.91408	-3.69107	0.000299089	0.00331086	Significantly downregulated (Adj-P<0.01)
ENSG00000269343.6_ZNF587B	ZNF587B	-0.20706	2.39	-3.62486	0.000380062	0.00393265	Significantly downregulated (Adj-P<0.01)
ENSG00000108591.9_DRG2	DRG2	-0.117258	4.19599	-3.69514	0.000294693	0.00327878	Significantly downregulated (Adj-P<0.01)
ENSG00000279668.2_AC024610.2	AC024610.2	-1.01778	0.257908	-3.52966	0.000533313	0.00514214	Significantly downregulated (Adj-P<0.01)
ENSG00000111331.12_OAS3	OAS3	0.485138	2.35028	3.63064	0.000372243	0.0038696	Significantly upregulated (Adj-P<0.01)
ENSG00000099875.14_MKNK2	MKNK2	-0.239559	8.74231	-3.67034	0.000322508	0.00348779	Significantly downregulated (Adj-P<0.01)
ENSG00000171206.14_TRIM8	TRIM8	0.157569	6.05467	3.6987	0.000290889	0.00324295	Significantly upregulated (Adj-P<0.01)
ENSG00000058404.19_CAMK2B	CAMK2B	-0.157006	7.32106	-3.68737	0.000303153	0.00334171	Significantly downregulated (Adj-P<0.01)
ENSG00000058866.14_DGKG	DGKG	-0.359176	1.1225	-3.55975	0.000479515	0.00473095	Significantly downregulated (Adj-P<0.01)
ENSG00000104365.14_IKBKB	IKBKB	0.274178	5.6981	3.6991	0.000290459	0.00324047	Significantly upregulated (Adj-P<0.01)
ENSG00000111424.10_VDR	VDR	0.448959	-0.407464	3.51611	0.000559353	0.00531809	Significantly upregulated (Adj-P<0.01)
ENSG00000160199.14_PKNOX1	PKNOX1	-0.166381	3.74984	-3.67589	0.000316071	0.00344162	Significantly downregulated (Adj-P<0.01)
ENSG00000007341.18_ST7L	ST7L	-0.144475	2.48576	-3.62543	0.000379281	0.00392975	Significantly downregulated (Adj-P<0.01)
ENSG00000176871.8_WSB2	WSB2	0.150589	6.194	3.6951	0.000294728	0.00327878	Significantly upregulated (Adj-P<0.01)
ENSG00000162129.13_CLPB	CLPB	0.164073	3.82791	3.68052	0.000310803	0.00340214	Significantly upregulated (Adj-P<0.01)
ENSG00000123505.15_AMD1	AMD1	-0.190484	4.46393	-3.68935	0.000300973	0.00332937	Significantly downregulated (Adj-P<0.01)
ENSG00000023171.17_GRAMD1B	GRAMD1B	0.377093	2.75815	3.64696	0.000350974	0.00369748	Significantly upregulated (Adj-P<0.01)
ENSG00000280323.1_AC053503.6	AC053503.6	0.383443	2.86697	3.63769	0.000362908	0.00380787	Significantly upregulated (Adj-P<0.01)
ENSG00000111605.17_CPSF6	CPSF6	-0.157308	4.65406	-3.69206	0.000298013	0.00330127	Significantly downregulated (Adj-P<0.01)
ENSG00000120688.8_WBP4	WBP4	-0.17992	5.2768	-3.6943	0.000295591	0.00328371	Significantly downregulated (Adj-P<0.01)
ENSG00000204054.13_LINC00963	LINC00963	0.363085	3.12678	3.6571	0.000338351	0.00361299	Significantly upregulated (Adj-P<0.01)
ENSG00000080189.14_SLC35C2	SLC35C2	-0.141135	3.65919	-3.67086	0.000321897	0.0034847	Significantly downregulated (Adj-P<0.01)
ENSG00000085231.13_AK6	AK6	-0.129509	3.91167	-3.67262	0.000319849	0.00347211	Significantly downregulated (Adj-P<0.01)
ENSG00000185163.9_DDX51	DDX51	-0.165494	3.94796	-3.67733	0.000314425	0.00342745	Significantly downregulated (Adj-P<0.01)
ENSG00000041357.15_PSMA4	PSMA4	-0.106942	5.98486	-3.68855	0.000301853	0.00333675	Significantly downregulated (Adj-P<0.01)
ENSG00000186998.15_EMID1	EMID1	0.483235	-0.785951	3.50099	0.00058982	0.00551752	Significantly upregulated (Adj-P<0.01)
ENSG00000213906.9_LTB4R2	LTB4R2	0.311057	1.06813	3.57085	0.000460983	0.00457889	Significantly upregulated (Adj-P<0.01)
ENSG00000156931.15_VPS8	VPS8	-0.258368	5.36021	-3.68757	0.000302928	0.00334171	Significantly downregulated (Adj-P<0.01)
ENSG00000141682.11_PMAIP1	PMAIP1	0.641248	-1.15598	3.48248	0.000629244	0.00579288	Significantly upregulated (Adj-P<0.01)
ENSG00000111245.14_MYL2	MYL2	-0.344676	12.57	-3.60194	0.00041261	0.00419027	Significantly downregulated (Adj-P<0.01)
ENSG00000177096.8_PHETA2	PHETA2	0.358247	0.369231	3.53108	0.000530646	0.00511958	Significantly upregulated (Adj-P<0.01)
ENSG00000153560.11_UBP1	UBP1	0.130199	4.66599	3.68255	0.000308516	0.00338183	Significantly upregulated (Adj-P<0.01)
ENSG00000270392.2_PFN1P2	PFN1P2	-0.367067	0.489146	-3.52409	0.000543869	0.00521191	Significantly downregulated (Adj-P<0.01)
ENSG00000143344.15_RGL1	RGL1	0.390496	1.3292	3.56601	0.000468971	0.00465031	Significantly upregulated (Adj-P<0.01)
ENSG00000175832.12_ETV4	ETV4	1.14543	-2.51719	3.48022	0.000634209	0.00582515	Significantly upregulated (Adj-P<0.01)
ENSG00000106682.14_EIF4H	EIF4H	-0.131009	7.87178	-3.66349	0.000330608	0.00355206	Significantly downregulated (Adj-P<0.01)
ENSG00000125977.6_EIF2S2	EIF2S2	-0.120637	6.10204	-3.67981	0.000311607	0.0034062	Significantly downregulated (Adj-P<0.01)
ENSG00000185798.7_WDR53	WDR53	-0.168064	1.83965	-3.57722	0.000450662	0.00449717	Significantly downregulated (Adj-P<0.01)
ENSG00000067836.12_ROGDI	ROGDI	0.231316	5.01033	3.67916	0.000312344	0.00341187	Significantly upregulated (Adj-P<0.01)
ENSG00000163798.13_SLC4A1AP	SLC4A1AP	-0.0921684	4.56795	-3.67515	0.000316926	0.00344514	Significantly downregulated (Adj-P<0.01)
ENSG00000171150.8_SOCS5	SOCS5	-0.152919	3.97562	-3.65853	0.000336597	0.00359671	Significantly downregulated (Adj-P<0.01)
ENSG00000114654.7_EFCC1	EFCC1	0.313719	0.231246	3.51338	0.000564743	0.00535313	Significantly upregulated (Adj-P<0.01)
ENSG00000143258.15_USP21	USP21	-0.132731	3.83646	-3.66014	0.000334651	0.00358812	Significantly downregulated (Adj-P<0.01)
ENSG00000174951.11_FUT1	FUT1	0.34223	0.559011	3.52007	0.000551623	0.00526053	Significantly upregulated (Adj-P<0.01)
ENSG00000124222.22_STX16	STX16	-0.125676	6.03351	-3.67516	0.000316913	0.00344514	Significantly downregulated (Adj-P<0.01)
ENSG00000269881.1_AC004754.1	AC004754.1	-0.451889	-0.179147	-3.48887	0.000615351	0.00569527	Significantly downregulated (Adj-P<0.01)
ENSG00000158406.4_HIST1H4H	HIST1H4H	-0.252984	1.76361	-3.56421	0.000471972	0.00467121	Significantly downregulated (Adj-P<0.01)
ENSG00000118369.12_USP35	USP35	0.213788	2.28444	3.60501	0.000408106	0.00415707	Significantly upregulated (Adj-P<0.01)
ENSG00000151702.16_FLI1	FLI1	0.305106	2.42441	3.60083	0.000414254	0.00420061	Significantly upregulated (Adj-P<0.01)
ENSG00000115155.17_OTOF	OTOF	0.684941	-1.31489	3.46827	0.000661158	0.00599505	Significantly upregulated (Adj-P<0.01)
ENSG00000152404.15_CWF19L2	CWF19L2	-0.20198	3.00802	-3.6057	0.000407096	0.00415217	Significantly downregulated (Adj-P<0.01)
ENSG00000139318.7_DUSP6	DUSP6	0.366366	2.31393	3.59336	0.000425457	0.00428928	Significantly upregulated (Adj-P<0.01)
ENSG00000187922.13_LCN10	LCN10	0.69678	-0.510552	3.47561	0.000644478	0.00589241	Significantly upregulated (Adj-P<0.01)
ENSG00000072042.12_RDH11	RDH11	0.168517	2.58995	3.60188	0.0004127	0.00419027	Significantly upregulated (Adj-P<0.01)
ENSG00000205937.11_RNPS1	RNPS1	-0.110608	6.8185	-3.65925	0.000335723	0.00358981	Significantly downregulated (Adj-P<0.01)
ENSG00000014138.8_POLA2	POLA2	-0.185832	1.96673	-3.57356	0.000456558	0.00454733	Significantly downregulated (Adj-P<0.01)
ENSG00000143256.4_PFDN2	PFDN2	-0.197069	4.66543	-3.66513	0.000328651	0.00354316	Significantly downregulated (Adj-P<0.01)
ENSG00000005100.12_DHX33	DHX33	0.134459	3.36369	3.63338	0.000368584	0.00385197	Significantly upregulated (Adj-P<0.01)
ENSG00000120279.6_MYCT1	MYCT1	0.256635	2.69537	3.60361	0.000410148	0.00417515	Significantly upregulated (Adj-P<0.01)
ENSG00000154760.13_SLFN13	SLFN13	0.448288	-0.328194	3.47695	0.000641488	0.00587139	Significantly upregulated (Adj-P<0.01)
ENSG00000133056.13_PIK3C2B	PIK3C2B	0.222269	5.11291	3.66393	0.000330081	0.00354883	Significantly upregulated (Adj-P<0.01)
ENSG00000267364.1_AC022706.1	AC022706.1	-0.460863	0.385121	-3.49655	0.000599048	0.00557065	Significantly downregulated (Adj-P<0.01)
ENSG00000124145.6_SDC4	SDC4	-0.266306	4.88797	-3.66237	0.00033196	0.00356171	Significantly downregulated (Adj-P<0.01)
ENSG00000117525.13_F3	F3	0.398955	1.55161	3.5527	0.000491643	0.00482032	Significantly upregulated (Adj-P<0.01)
ENSG00000197702.12_PARVA	PARVA	0.282149	3.31745	3.62875	0.000374785	0.00389088	Significantly upregulated (Adj-P<0.01)
ENSG00000166813.14_KIF7	KIF7	0.350184	0.0889177	3.4917	0.000609296	0.00565255	Significantly upregulated (Adj-P<0.01)
ENSG00000173548.8_SNX33	SNX33	0.232528	2.87983	3.61452	0.00039444	0.0040441	Significantly upregulated (Adj-P<0.01)
ENSG00000143630.9_HCN3	HCN3	0.297831	-0.0687649	3.48631	0.000620879	0.00573628	Significantly upregulated (Adj-P<0.01)
ENSG00000204256.12_BRD2	BRD2	-0.105022	6.51623	-3.65447	0.000341586	0.00363764	Significantly downregulated (Adj-P<0.01)
ENSG00000136877.14_FPGS	FPGS	-0.209181	4.93992	-3.65953	0.000335392	0.00358918	Significantly downregulated (Adj-P<0.01)
ENSG00000152767.16_FARP1	FARP1	0.394934	4.12984	3.65236	0.000344202	0.00365064	Significantly upregulated (Adj-P<0.01)
ENSG00000148680.15_HTR7	HTR7	1.00673	-0.768375	3.46114	0.00067773	0.00609647	Significantly upregulated (Adj-P<0.01)
ENSG00000028528.14_SNX1	SNX1	-0.0933755	5.71589	-3.65949	0.000335435	0.00358918	Significantly downregulated (Adj-P<0.01)
ENSG00000171310.10_CHST11	CHST11	0.478852	-0.991948	3.45421	0.000694233	0.00621996	Significantly upregulated (Adj-P<0.01)
ENSG00000184005.10_ST6GALNAC3	ST6GALNAC3	0.448348	-0.0923922	3.46802	0.000661731	0.00599505	Significantly upregulated (Adj-P<0.01)
ENSG00000276231.4_PIK3R6	PIK3R6	0.500993	-1.36328	3.45163	0.00070046	0.00626146	Significantly upregulated (Adj-P<0.01)
ENSG00000187051.8_RPS19BP1	RPS19BP1	-0.192233	4.4371	-3.65322	0.00034313	0.00364665	Significantly downregulated (Adj-P<0.01)
ENSG00000118046.14_STK11	STK11	-0.170543	6.38995	-3.65276	0.000343695	0.00365019	Significantly downregulated (Adj-P<0.01)
ENSG00000092421.16_SEMA6A	SEMA6A	0.250492	2.97315	3.61029	0.000400465	0.00409784	Significantly upregulated (Adj-P<0.01)
ENSG00000156011.16_PSD3	PSD3	0.343445	0.694739	3.50271	0.00058628	0.00550477	Significantly upregulated (Adj-P<0.01)
ENSG00000103047.7_TANGO6	TANGO6	-0.146775	3.19479	-3.6092	0.00040203	0.00411118	Significantly downregulated (Adj-P<0.01)
ENSG00000166595.11_CIAO2B	CIAO2B	-0.183794	5.0617	-3.65097	0.000345926	0.0036615	Significantly downregulated (Adj-P<0.01)
ENSG00000108651.9_UTP6	UTP6	-0.110841	3.82852	-3.63123	0.000371445	0.00386643	Significantly downregulated (Adj-P<0.01)
ENSG00000185883.11_ATP6V0C	ATP6V0C	-0.145228	5.71281	-3.64784	0.000349863	0.0036896	Significantly downregulated (Adj-P<0.01)
ENSG00000154813.9_DPH3	DPH3	-0.199401	4.36504	-3.63905	0.000361142	0.00379187	Significantly downregulated (Adj-P<0.01)
ENSG00000114416.17_FXR1	FXR1	-0.132204	9.00885	-3.61482	0.000394007	0.0040441	Significantly downregulated (Adj-P<0.01)
ENSG00000237301.1_AL121992.1	AL121992.1	-0.484952	-0.574838	-3.44463	0.000717651	0.00636799	Significantly downregulated (Adj-P<0.01)
ENSG00000188042.7_ARL4C	ARL4C	0.536357	-0.266723	3.46055	0.000679134	0.0061021	Significantly upregulated (Adj-P<0.01)
ENSG00000140577.15_CRTC3	CRTC3	0.152481	3.9207	3.62995	0.000373163	0.0038766	Significantly upregulated (Adj-P<0.01)
ENSG00000268518.1_AC020909.2	AC020909.2	0.369174	5.97903	3.64244	0.000356752	0.00375331	Significantly upregulated (Adj-P<0.01)
ENSG00000278464.1_AC068506.1	AC068506.1	-0.355788	1.65658	-3.53585	0.000521794	0.0050457	Significantly downregulated (Adj-P<0.01)
ENSG00000262370.5_AC108134.3	AC108134.3	0.388472	-0.805751	3.44379	0.00071975	0.00637669	Significantly upregulated (Adj-P<0.01)
ENSG00000167380.16_ZNF226	ZNF226	-0.223383	2.50786	-3.57101	0.000460718	0.00457889	Significantly downregulated (Adj-P<0.01)
ENSG00000168497.4_CAVIN2	CAVIN2	0.305006	4.40895	3.63691	0.00036393	0.00381604	Significantly upregulated (Adj-P<0.01)
ENSG00000153303.17_FRMD1	FRMD1	-0.857624	-0.72261	-3.44865	0.000707744	0.00630145	Significantly downregulated (Adj-P<0.01)
ENSG00000151348.13_EXT2	EXT2	0.121102	3.58798	3.61886	0.000388334	0.00399424	Significantly upregulated (Adj-P<0.01)
ENSG00000135315.11_CEP162	CEP162	0.248745	1.13409	3.50284	0.000586013	0.00550477	Significantly upregulated (Adj-P<0.01)
ENSG00000109917.10_ZPR1	ZPR1	-0.156953	3.3603	-3.60757	0.000404382	0.00413254	Significantly downregulated (Adj-P<0.01)
ENSG00000169714.16_CNBP	CNBP	-0.119121	9.36383	-3.60051	0.00041472	0.00420262	Significantly downregulated (Adj-P<0.01)
ENSG00000100368.13_CSF2RB	CSF2RB	0.576167	-0.163653	3.44979	0.000704959	0.00628736	Significantly upregulated (Adj-P<0.01)
ENSG00000175309.14_PHYKPL	PHYKPL	0.146589	4.34374	3.63153	0.00037105	0.00386488	Significantly upregulated (Adj-P<0.01)
ENSG00000167460.15_TPM4	TPM4	0.324377	4.51613	3.6325	0.000369764	0.0038566	Significantly upregulated (Adj-P<0.01)
ENSG00000167178.15_ISLR2	ISLR2	0.428628	0.261142	3.46808	0.000661593	0.00599505	Significantly upregulated (Adj-P<0.01)
ENSG00000198824.6_CHAMP1	CHAMP1	-0.161802	3.13772	-3.58762	0.000434266	0.00436128	Significantly downregulated (Adj-P<0.01)
ENSG00000214827.9_MTCP1	MTCP1	0.368748	0.74005	3.47931	0.000636236	0.00583877	Significantly upregulated (Adj-P<0.01)
ENSG00000163902.11_RPN1	RPN1	-0.120741	5.32557	-3.6327	0.00036949	0.0038566	Significantly downregulated (Adj-P<0.01)
ENSG00000279088.1_AC022400.7	AC022400.7	-0.22184	1.55042	-3.51257	0.000566349	0.00536187	Significantly downregulated (Adj-P<0.01)
ENSG00000089280.18_FUS	FUS	-0.118121	7.20449	-3.61817	0.000389295	0.00399919	Significantly downregulated (Adj-P<0.01)
ENSG00000253731.2_PCDHGA6	PCDHGA6	-0.351286	0.493887	-3.46274	0.000673981	0.0060774	Significantly downregulated (Adj-P<0.01)
ENSG00000225950.8_NTF4	NTF4	-0.315464	2.15401	-3.5448	0.000505561	0.00492582	Significantly downregulated (Adj-P<0.01)
ENSG00000096746.17_HNRNPH3	HNRNPH3	-0.124039	6.27111	-3.62567	0.000378948	0.0039289	Significantly downregulated (Adj-P<0.01)
ENSG00000174444.14_RPL4	RPL4	-0.119835	9.60051	-3.58323	0.000441117	0.0044216	Significantly downregulated (Adj-P<0.01)
ENSG00000115840.13_SLC25A12	SLC25A12	0.189445	7.48973	3.61312	0.000396419	0.00406175	Significantly upregulated (Adj-P<0.01)
ENSG00000136144.11_RCBTB1	RCBTB1	0.23391	2.92122	3.57646	0.000451876	0.00450642	Significantly upregulated (Adj-P<0.01)
ENSG00000130396.20_AFDN	AFDN	0.225804	5.0882	3.62648	0.000377853	0.00392013	Significantly upregulated (Adj-P<0.01)
ENSG00000134490.13_TMEM241	TMEM241	0.311612	-0.144939	3.43947	0.000730566	0.00644977	Significantly upregulated (Adj-P<0.01)
ENSG00000147526.19_TACC1	TACC1	0.27889	5.01265	3.62442	0.000380655	0.00393619	Significantly upregulated (Adj-P<0.01)
ENSG00000121410.11_A1BG	A1BG	0.513771	-1.38498	3.41477	0.000795478	0.00688727	Significantly upregulated (Adj-P<0.01)
ENSG00000110274.15_CEP164	CEP164	0.187897	2.3871	3.55486	0.000487888	0.00478948	Significantly upregulated (Adj-P<0.01)
ENSG00000254245.2_PCDHGA3	PCDHGA3	-0.531167	-0.665607	-3.41478	0.000795459	0.00688727	Significantly downregulated (Adj-P<0.01)
ENSG00000039123.15_MTREX	MTREX	-0.1412	5.54748	-3.62381	0.000381491	0.00394224	Significantly downregulated (Adj-P<0.01)
ENSG00000117013.15_KCNQ4	KCNQ4	-0.370937	2.54429	-3.56246	0.000474919	0.00468855	Significantly downregulated (Adj-P<0.01)
ENSG00000074621.13_SLC24A1	SLC24A1	0.294938	0.323314	3.45212	0.000699288	0.00625454	Significantly upregulated (Adj-P<0.01)
ENSG00000013374.16_NUB1	NUB1	-0.115093	5.41537	-3.62279	0.000382898	0.00395158	Significantly downregulated (Adj-P<0.01)
ENSG00000196730.12_DAPK1	DAPK1	0.320033	1.74807	3.52196	0.000547972	0.00524163	Significantly upregulated (Adj-P<0.01)
ENSG00000132359.14_RAP1GAP2	RAP1GAP2	0.377332	0.860431	3.47888	0.00063718	0.00583877	Significantly upregulated (Adj-P<0.01)
ENSG00000100991.11_TRPC4AP	TRPC4AP	-0.100143	5.6974	-3.62111	0.000385213	0.00396765	Significantly downregulated (Adj-P<0.01)
ENSG00000204599.14_TRIM39	TRIM39	-0.117364	3.21686	-3.58022	0.000445866	0.0044578	Significantly downregulated (Adj-P<0.01)
ENSG00000176700.20_SCAND2P	SCAND2P	-0.178651	3.07095	-3.5715	0.000459921	0.00457792	Significantly downregulated (Adj-P<0.01)
ENSG00000154930.14_ACSS1	ACSS1	-0.344092	5.6997	-3.619	0.000388143	0.00399424	Significantly downregulated (Adj-P<0.01)
ENSG00000108465.14_CDK5RAP3	CDK5RAP3	-0.166065	5.13733	-3.6187	0.000388559	0.00399424	Significantly downregulated (Adj-P<0.01)
ENSG00000060642.10_PIGV	PIGV	-0.191579	1.62621	-3.50066	0.000590505	0.00552028	Significantly downregulated (Adj-P<0.01)
ENSG00000182218.9_HHIPL1	HHIPL1	0.373051	-0.48382	3.42574	0.000766022	0.00669502	Significantly upregulated (Adj-P<0.01)
ENSG00000034971.16_MYOC	MYOC	-0.523671	3.7645	-3.59534	0.000422456	0.00426724	Significantly downregulated (Adj-P<0.01)
ENSG00000111665.11_CDCA3	CDCA3	0.413441	-1.2976	3.4036	0.000826589	0.00711347	Significantly upregulated (Adj-P<0.01)
ENSG00000104691.14_UBXN8	UBXN8	0.22897	0.532251	3.45319	0.00069669	0.00623486	Significantly upregulated (Adj-P<0.01)
ENSG00000179021.9_C3orf38	C3orf38	-0.185105	2.45727	-3.53573	0.000522025	0.0050457	Significantly downregulated (Adj-P<0.01)
ENSG00000257122.5_RRN3P3	RRN3P3	-0.200743	2.45371	-3.54296	0.00050887	0.00494158	Significantly downregulated (Adj-P<0.01)
ENSG00000066248.14_NGEF	NGEF	-0.626399	-1.36025	-3.39922	0.000839089	0.00719736	Significantly downregulated (Adj-P<0.01)
ENSG00000099139.13_PCSK5	PCSK5	0.465524	0.793312	3.45699	0.000687576	0.00616736	Significantly upregulated (Adj-P<0.01)
ENSG00000101224.17_CDC25B	CDC25B	0.22207	2.59186	3.55697	0.000484253	0.00476572	Significantly upregulated (Adj-P<0.01)
ENSG00000197044.10_ZNF441	ZNF441	-0.252697	2.86752	-3.55331	0.000490581	0.00481291	Significantly downregulated (Adj-P<0.01)
ENSG00000285043.1_AC093512.2	AC093512.2	-0.196282	7.09659	-3.60166	0.000413031	0.00419092	Significantly downregulated (Adj-P<0.01)
ENSG00000161791.13_FMNL3	FMNL3	0.238201	3.91376	3.59717	0.000419715	0.00424229	Significantly upregulated (Adj-P<0.01)
ENSG00000120594.16_PLXDC2	PLXDC2	0.246997	3.72724	3.58793	0.000433786	0.00435924	Significantly upregulated (Adj-P<0.01)
ENSG00000165312.6_OTUD1	OTUD1	-0.752896	6.01809	-3.60649	0.00040595	0.00414412	Significantly downregulated (Adj-P<0.01)
ENSG00000132357.13_CARD6	CARD6	0.271781	0.991868	3.46097	0.000678133	0.00609659	Significantly upregulated (Adj-P<0.01)
ENSG00000177374.12_HIC1	HIC1	0.27001	3.85365	3.5948	0.000423281	0.00427282	Significantly upregulated (Adj-P<0.01)
ENSG00000107338.9_SHB	SHB	0.329238	1.72495	3.50837	0.000574754	0.00542508	Significantly upregulated (Adj-P<0.01)
ENSG00000166801.15_FAM111A	FAM111A	0.269513	2.65021	3.54535	0.00050459	0.00492266	Significantly upregulated (Adj-P<0.01)
ENSG00000214097.4_SMCO1	SMCO1	-0.278586	6.37636	-3.60236	0.00041199	0.00418848	Significantly downregulated (Adj-P<0.01)
ENSG00000188735.12_TMEM120B	TMEM120B	-0.210071	5.43258	-3.60515	0.000407904	0.00415707	Significantly downregulated (Adj-P<0.01)
ENSG00000172936.13_MYD88	MYD88	0.364839	1.09462	3.47224	0.00065208	0.00593718	Significantly upregulated (Adj-P<0.01)
ENSG00000280339.1_AP001528.3	AP001528.3	0.294021	1.94714	3.50338	0.000584891	0.00550422	Significantly upregulated (Adj-P<0.01)
ENSG00000205403.13_CFI	CFI	0.319652	1.18726	3.4716	0.000653542	0.00594704	Significantly upregulated (Adj-P<0.01)
ENSG00000169962.4_TAS1R3	TAS1R3	0.292689	0.88869	3.47559	0.000644535	0.00589241	Significantly upregulated (Adj-P<0.01)
ENSG00000198753.11_PLXNB3	PLXNB3	0.597112	-1.145	3.39194	0.000860235	0.00731793	Significantly upregulated (Adj-P<0.01)
ENSG00000184451.5_CCR10	CCR10	0.254467	1.43621	3.4962	0.000599782	0.00557417	Significantly upregulated (Adj-P<0.01)
ENSG00000254783.1_AP003084.1	AP003084.1	-0.396592	-0.763535	-3.38802	0.000871861	0.00739762	Significantly downregulated (Adj-P<0.01)
ENSG00000162551.13_ALPL	ALPL	0.534801	-1.00656	3.38866	0.000869951	0.00738541	Significantly upregulated (Adj-P<0.01)
ENSG00000204681.10_GABBR1	GABBR1	0.240449	3.34691	3.57072	0.000461186	0.00457889	Significantly upregulated (Adj-P<0.01)
ENSG00000146856.14_AGBL3	AGBL3	-0.311979	0.838991	-3.44088	0.00072701	0.00642922	Significantly downregulated (Adj-P<0.01)
ENSG00000261220.2_AC103706.1	AC103706.1	0.394071	-0.582411	3.39666	0.000846467	0.00724877	Significantly upregulated (Adj-P<0.01)
ENSG00000141994.15_DUS3L	DUS3L	-0.232033	3.088	-3.55665	0.000484807	0.00476601	Significantly downregulated (Adj-P<0.01)
ENSG00000145861.7_C1QTNF2	C1QTNF2	0.344602	-0.0797579	3.4199	0.000781576	0.0067903	Significantly upregulated (Adj-P<0.01)
ENSG00000165655.16_ZNF503	ZNF503	0.310538	1.38674	3.48237	0.000629465	0.00579288	Significantly upregulated (Adj-P<0.01)
ENSG00000084463.7_WBP11	WBP11	-0.116942	5.39974	-3.59738	0.000419392	0.00424175	Significantly downregulated (Adj-P<0.01)
ENSG00000137834.14_SMAD6	SMAD6	0.444634	0.625718	3.44487	0.00071705	0.00636799	Significantly upregulated (Adj-P<0.01)
ENSG00000107758.15_PPP3CB	PPP3CB	-0.185813	8.09364	-3.57406	0.000455753	0.00454219	Significantly downregulated (Adj-P<0.01)
ENSG00000130706.12_ADRM1	ADRM1	-0.201992	6.24413	-3.5894	0.000431516	0.00433921	Significantly downregulated (Adj-P<0.01)
ENSG00000145632.14_PLK2	PLK2	0.314792	2.14767	3.50715	0.000577215	0.00544177	Significantly upregulated (Adj-P<0.01)
ENSG00000138326.19_RPS24	RPS24	-0.130835	8.54468	-3.56273	0.000474461	0.00468698	Significantly downregulated (Adj-P<0.01)
ENSG00000283663.1_AC008687.8	AC008687.8	-0.46598	-0.243471	-3.40771	0.000815005	0.00702533	Significantly downregulated (Adj-P<0.01)
ENSG00000280734.2_LINC01232	LINC01232	0.385759	-1.02059	3.37612	0.000907971	0.00764205	Significantly upregulated (Adj-P<0.01)
ENSG00000184216.13_IRAK1	IRAK1	0.251784	5.07939	3.58947	0.000431408	0.00433921	Significantly upregulated (Adj-P<0.01)
ENSG00000171497.4_PPID	PPID	-0.122538	5.34182	-3.58981	0.000430885	0.00433842	Significantly downregulated (Adj-P<0.01)
ENSG00000112290.12_WASF1	WASF1	0.471806	-1.47904	3.36968	0.000928101	0.00775327	Significantly upregulated (Adj-P<0.01)
ENSG00000243708.10_PLA2G4B	PLA2G4B	-0.277793	2.32439	-3.51519	0.000561171	0.00533095	Significantly downregulated (Adj-P<0.01)
ENSG00000141449.14_GREB1L	GREB1L	-0.309941	3.88347	-3.56397	0.000472385	0.00467235	Significantly downregulated (Adj-P<0.01)
ENSG00000088340.15_FER1L4	FER1L4	0.41156	-1.29204	3.36507	0.000942778	0.00784665	Significantly upregulated (Adj-P<0.01)
ENSG00000151693.10_ASAP2	ASAP2	0.371582	1.79898	3.47362	0.000648974	0.00591233	Significantly upregulated (Adj-P<0.01)
ENSG00000132004.12_FBXW9	FBXW9	0.290087	-0.134274	3.39632	0.000847458	0.00725329	Significantly upregulated (Adj-P<0.01)
ENSG00000146386.7_ABRACL	ABRACL	0.439337	-1.24961	3.36379	0.00094688	0.00787244	Significantly upregulated (Adj-P<0.01)
ENSG00000261603.2_PRSS46P	PRSS46P	-0.819308	-1.77825	-3.36524	0.000942246	0.00784638	Significantly downregulated (Adj-P<0.01)
ENSG00000111728.10_ST8SIA1	ST8SIA1	0.440983	-0.376695	3.38332	0.00088595	0.00748077	Significantly upregulated (Adj-P<0.01)
ENSG00000175782.9_SLC35E3	SLC35E3	0.135389	3.5452	3.54911	0.000497915	0.00486964	Significantly upregulated (Adj-P<0.01)
ENSG00000116774.11_OLFML3	OLFML3	0.339164	2.09879	3.49922	0.000593475	0.00553522	Significantly upregulated (Adj-P<0.01)
ENSG00000247271.6_ZBED5-AS1	ZBED5-AS1	0.222374	1.6473	3.4685	0.000660639	0.00599505	Significantly upregulated (Adj-P<0.01)
ENSG00000166845.14_C18orf54	C18orf54	0.412916	-0.923309	3.36009	0.000958853	0.00795934	Significantly upregulated (Adj-P<0.01)
ENSG00000257151.1_PWAR6	PWAR6	-0.333853	4.20325	-3.56307	0.000473896	0.00468435	Significantly downregulated (Adj-P<0.01)
ENSG00000072849.10_DERL2	DERL2	-0.112068	3.14873	-3.53144	0.000529981	0.0051163	Significantly downregulated (Adj-P<0.01)
ENSG00000133026.12_MYH10	MYH10	0.298623	3.28141	3.5381	0.000517668	0.00500976	Significantly upregulated (Adj-P<0.01)
ENSG00000196091.13_MYBPC1	MYBPC1	-0.152671	13.6732	-3.47443	0.000647135	0.00590929	Significantly downregulated (Adj-P<0.01)
ENSG00000111275.12_ALDH2	ALDH2	-0.212722	7.6159	-3.55775	0.000482912	0.00475551	Significantly downregulated (Adj-P<0.01)
ENSG00000145423.4_SFRP2	SFRP2	0.810028	-0.457952	3.37094	0.000924134	0.00772836	Significantly upregulated (Adj-P<0.01)
ENSG00000131323.14_TRAF3	TRAF3	0.206753	2.9687	3.52617	0.000539906	0.00518026	Significantly upregulated (Adj-P<0.01)
ENSG00000111412.5_C12orf49	C12orf49	0.169271	2.13764	3.48292	0.000628264	0.00579088	Significantly upregulated (Adj-P<0.01)
ENSG00000142002.17_DPP9	DPP9	-0.147717	5.86196	-3.57086	0.000460964	0.00457889	Significantly downregulated (Adj-P<0.01)
ENSG00000155849.15_ELMO1	ELMO1	0.317502	1.04741	3.43031	0.000754045	0.00661612	Significantly upregulated (Adj-P<0.01)
ENSG00000164850.14_GPER1	GPER1	0.308534	0.700566	3.41658	0.000790535	0.00685582	Significantly upregulated (Adj-P<0.01)
ENSG00000133597.10_ADCK2	ADCK2	0.18097	2.75007	3.51175	0.000567982	0.00537409	Significantly upregulated (Adj-P<0.01)
ENSG00000172775.16_FAM192A	FAM192A	-0.0900476	4.95641	-3.5651	0.000470498	0.00465957	Significantly downregulated (Adj-P<0.01)
ENSG00000115649.15_CNPPD1	CNPPD1	-0.163634	5.2335	-3.56538	0.000470017	0.00465774	Significantly downregulated (Adj-P<0.01)
ENSG00000175344.17_CHRNA7	CHRNA7	-0.545261	-0.889019	-3.34584	0.00100634	0.0082398	Significantly downregulated (Adj-P<0.01)
ENSG00000174429.3_ABRA	ABRA	-0.485389	6.90781	-3.55605	0.000485841	0.00477236	Significantly downregulated (Adj-P<0.01)
ENSG00000213719.8_CLIC1	CLIC1	0.324766	2.88313	3.5214	0.000549046	0.00524516	Significantly upregulated (Adj-P<0.01)
ENSG00000264490.3_BX640514.1	BX640514.1	0.484898	2.40077	3.5025	0.000586703	0.00550477	Significantly upregulated (Adj-P<0.01)
ENSG00000182307.13_C8orf33	C8orf33	-0.10605	4.14919	-3.55149	0.000493738	0.00483784	Significantly downregulated (Adj-P<0.01)
ENSG00000100105.17_PATZ1	PATZ1	-0.159168	3.85256	-3.5448	0.000505566	0.00492582	Significantly downregulated (Adj-P<0.01)
ENSG00000134851.12_TMEM165	TMEM165	0.186054	2.96052	3.5137	0.000564113	0.00535038	Significantly upregulated (Adj-P<0.01)
ENSG00000133958.13_UNC79	UNC79	0.30979	0.410076	3.38726	0.000874124	0.00740481	Significantly upregulated (Adj-P<0.01)
ENSG00000160796.16_NBEAL2	NBEAL2	0.214049	3.56492	3.53873	0.000516516	0.00500443	Significantly upregulated (Adj-P<0.01)
ENSG00000104969.9_SGTA	SGTA	-0.14169	6.01951	-3.5566	0.00048489	0.00476601	Significantly downregulated (Adj-P<0.01)
ENSG00000072682.18_P4HA2	P4HA2	0.210709	2.75075	3.50049	0.00059086	0.00552028	Significantly upregulated (Adj-P<0.01)
ENSG00000117682.16_DHDDS	DHDDS	0.17472	2.74057	3.50164	0.000588486	0.00550833	Significantly upregulated (Adj-P<0.01)
ENSG00000133106.14_EPSTI1	EPSTI1	0.540503	0.0290744	3.37516	0.000910948	0.00765889	Significantly upregulated (Adj-P<0.01)
ENSG00000160593.18_JAML	JAML	0.731007	-0.196495	3.36031	0.000958148	0.0079577	Significantly upregulated (Adj-P<0.01)
ENSG00000156110.13_ADK	ADK	0.176139	3.82375	3.53873	0.000516522	0.00500443	Significantly upregulated (Adj-P<0.01)
ENSG00000178977.3_LINC00324	LINC00324	-0.338225	-0.619579	-3.3473	0.00100137	0.00820809	Significantly downregulated (Adj-P<0.01)
ENSG00000249464.5_LINC01091	LINC01091	-0.522063	0.592406	-3.39182	0.000860603	0.00731793	Significantly downregulated (Adj-P<0.01)
ENSG00000165886.4_UBTD1	UBTD1	-0.316926	3.436	-3.52782	0.000536777	0.00517171	Significantly downregulated (Adj-P<0.01)
ENSG00000105321.13_CCDC9	CCDC9	-0.218435	3.92824	-3.5402	0.000513842	0.00498503	Significantly downregulated (Adj-P<0.01)
ENSG00000136010.13_ALDH1L2	ALDH1L2	0.339491	0.820462	3.39793	0.000842802	0.00722526	Significantly upregulated (Adj-P<0.01)
ENSG00000188993.3_LRRC66	LRRC66	-0.284738	2.93154	-3.50172	0.000588303	0.00550833	Significantly downregulated (Adj-P<0.01)
ENSG00000060339.13_CCAR1	CCAR1	-0.134264	5.02757	-3.55129	0.000494102	0.00483838	Significantly downregulated (Adj-P<0.01)
ENSG00000136897.7_MRPL50	MRPL50	-0.124909	3.77544	-3.52689	0.000538549	0.005179	Significantly downregulated (Adj-P<0.01)
ENSG00000151067.21_CACNA1C	CACNA1C	0.304755	1.5451	3.42986	0.000755224	0.00662277	Significantly upregulated (Adj-P<0.01)
ENSG00000101331.15_CCM2L	CCM2L	0.278091	1.84408	3.45388	0.000695034	0.00622359	Significantly upregulated (Adj-P<0.01)
ENSG00000138755.5_CXCL9	CXCL9	0.907332	-0.519025	3.35158	0.000986962	0.00813808	Significantly upregulated (Adj-P<0.01)
ENSG00000130962.17_PRRG1	PRRG1	-0.249715	4.52008	-3.54305	0.00050871	0.00494158	Significantly downregulated (Adj-P<0.01)
ENSG00000178988.10_MRFAP1L1	MRFAP1L1	-0.125969	4.61897	-3.544	0.000507001	0.00493391	Significantly downregulated (Adj-P<0.01)
ENSG00000135108.14_FBXO21	FBXO21	-0.203143	5.33689	-3.5467	0.000502191	0.00490229	Significantly downregulated (Adj-P<0.01)
ENSG00000162959.13_MEMO1	MEMO1	0.179605	4.82852	3.54464	0.000505856	0.00492582	Significantly upregulated (Adj-P<0.01)
ENSG00000204389.9_HSPA1A	HSPA1A	-0.276856	7.79776	-3.52628	0.000539707	0.00518026	Significantly downregulated (Adj-P<0.01)
ENSG00000138796.16_HADH	HADH	-0.159277	7.15836	-3.53354	0.000526078	0.00508175	Significantly downregulated (Adj-P<0.01)
ENSG00000178343.4_SHISA3	SHISA3	-0.882466	-1.62238	-3.32153	0.00109238	0.00872644	Significantly downregulated (Adj-P<0.01)
ENSG00000119844.15_AFTPH	AFTPH	-0.130432	3.66752	-3.51508	0.000561384	0.00533095	Significantly downregulated (Adj-P<0.01)
ENSG00000135740.16_SLC9A5	SLC9A5	-0.254517	1.32955	-3.41915	0.000783603	0.00679946	Significantly downregulated (Adj-P<0.01)
ENSG00000101846.6_STS	STS	0.295144	3.05641	3.49274	0.000607091	0.00563543	Significantly upregulated (Adj-P<0.01)
ENSG00000108669.16_CYTH1	CYTH1	-0.154598	6.08175	-3.53858	0.000516798	0.00500443	Significantly downregulated (Adj-P<0.01)
ENSG00000173530.5_TNFRSF10D	TNFRSF10D	0.32767	0.172667	3.35899	0.000962466	0.00798511	Significantly upregulated (Adj-P<0.01)
ENSG00000269825.1_AC022150.4	AC022150.4	0.465665	-1.32444	3.31543	0.00111506	0.00886229	Significantly upregulated (Adj-P<0.01)
ENSG00000118985.15_ELL2	ELL2	-0.280059	3.3642	-3.49817	0.000595671	0.00554582	Significantly downregulated (Adj-P<0.01)
ENSG00000184208.10_C22orf46	C22orf46	0.189808	3.19482	3.49879	0.000594379	0.00553708	Significantly upregulated (Adj-P<0.01)
ENSG00000220773.1_RPSAP44	RPSAP44	-0.499034	-1.26684	-3.311	0.00113177	0.00896307	Significantly downregulated (Adj-P<0.01)
ENSG00000120729.9_MYOT	MYOT	-0.18619	10.3038	-3.48232	0.000629589	0.00579288	Significantly downregulated (Adj-P<0.01)
ENSG00000114790.12_ARHGEF26	ARHGEF26	0.393431	-0.334692	3.33141	0.00105661	0.00851419	Significantly upregulated (Adj-P<0.01)
ENSG00000115318.11_LOXL3	LOXL3	0.378001	-0.00192659	3.35527	0.000974684	0.00805667	Significantly upregulated (Adj-P<0.01)
ENSG00000164284.14_GRPEL2	GRPEL2	0.183191	3.43737	3.5019	0.000587945	0.00550833	Significantly upregulated (Adj-P<0.01)
ENSG00000106624.10_AEBP1	AEBP1	0.473623	2.68356	3.48027	0.000634092	0.00582515	Significantly upregulated (Adj-P<0.01)
ENSG00000171365.16_CLCN5	CLCN5	0.288082	3.29176	3.50165	0.000588446	0.00550833	Significantly upregulated (Adj-P<0.01)
ENSG00000138061.11_CYP1B1	CYP1B1	-0.43256	1.35986	-3.39191	0.00086034	0.00731793	Significantly downregulated (Adj-P<0.01)
ENSG00000182676.4_PPP1R27	PPP1R27	-0.354314	7.28808	-3.51766	0.000556316	0.00529563	Significantly downregulated (Adj-P<0.01)
ENSG00000088836.13_SLC4A11	SLC4A11	-0.346309	1.06117	-3.38405	0.000883754	0.00747027	Significantly downregulated (Adj-P<0.01)
ENSG00000174586.10_ZNF497	ZNF497	0.429888	-1.02404	3.3134	0.00112267	0.00891375	Significantly upregulated (Adj-P<0.01)
ENSG00000089250.18_NOS1	NOS1	0.299415	6.9181	3.52219	0.000547532	0.00524062	Significantly upregulated (Adj-P<0.01)
ENSG00000136546.14_SCN7A	SCN7A	0.346413	3.57974	3.50274	0.000586219	0.00550477	Significantly upregulated (Adj-P<0.01)
ENSG00000113734.17_BNIP1	BNIP1	-0.180408	1.81646	-3.42134	0.000777713	0.00677081	Significantly downregulated (Adj-P<0.01)
ENSG00000137221.14_TJAP1	TJAP1	-0.124142	4.75649	-3.52676	0.000538785	0.005179	Significantly downregulated (Adj-P<0.01)
ENSG00000242028.6_HYPK	HYPK	0.166916	3.23305	3.49067	0.000611489	0.0056662	Significantly upregulated (Adj-P<0.01)
ENSG00000100764.13_PSMC1	PSMC1	-0.122355	6.88921	-3.5191	0.000553507	0.00527208	Significantly downregulated (Adj-P<0.01)
ENSG00000198015.12_MRPL42	MRPL42	-0.160424	4.54939	-3.52151	0.000548842	0.00524516	Significantly downregulated (Adj-P<0.01)
ENSG00000198542.13_ITGBL1	ITGBL1	0.37142	1.82763	3.42591	0.000765556	0.00669467	Significantly upregulated (Adj-P<0.01)
ENSG00000143106.12_PSMA5	PSMA5	-0.131411	4.72549	-3.52524	0.000541671	0.00519402	Significantly downregulated (Adj-P<0.01)
ENSG00000266208.1_AC080112.1	AC080112.1	0.371003	-0.251237	3.33149	0.00105634	0.00851419	Significantly upregulated (Adj-P<0.01)
ENSG00000049541.10_RFC2	RFC2	-0.141996	2.91745	-3.47422	0.000647614	0.00591023	Significantly downregulated (Adj-P<0.01)
ENSG00000106571.13_GLI3	GLI3	0.313532	0.889541	3.3722	0.000920181	0.00770351	Significantly upregulated (Adj-P<0.01)
ENSG00000108262.15_GIT1	GIT1	0.137181	4.1847	3.51629	0.000558994	0.0053179	Significantly upregulated (Adj-P<0.01)
ENSG00000003147.18_ICA1	ICA1	0.308077	0.439661	3.3535	0.000980543	0.00809657	Significantly upregulated (Adj-P<0.01)
ENSG00000285589.1_AC010422.8	AC010422.8	0.204188	1.8409	3.42816	0.000759663	0.00665797	Significantly upregulated (Adj-P<0.01)
ENSG00000116521.10_SCAMP3	SCAMP3	-0.126286	4.79515	-3.52125	0.000549343	0.00524516	Significantly downregulated (Adj-P<0.01)
ENSG00000135624.15_CCT7	CCT7	-0.10223	7.01634	-3.51288	0.000565736	0.00535929	Significantly downregulated (Adj-P<0.01)
ENSG00000196935.8_SRGAP1	SRGAP1	0.288446	0.575128	3.35139	0.000987589	0.00813808	Significantly upregulated (Adj-P<0.01)
ENSG00000162194.12_LBHD1	LBHD1	0.327883	-0.485457	3.31391	0.00112075	0.00890302	Significantly upregulated (Adj-P<0.01)
ENSG00000255310.2_AF131215.5	AF131215.5	0.49961	-1.31814	3.29087	0.00121072	0.0094457	Significantly upregulated (Adj-P<0.01)
ENSG00000160949.16_TONSL	TONSL	0.309767	-0.0139159	3.3346	0.0010453	0.00844904	Significantly upregulated (Adj-P<0.01)
ENSG00000176390.11_CRLF3	CRLF3	0.200547	1.61247	3.39563	0.000849454	0.00726421	Significantly upregulated (Adj-P<0.01)
ENSG00000091947.9_TMEM101	TMEM101	-0.155509	4.13196	-3.50774	0.00057603	0.00543386	Significantly downregulated (Adj-P<0.01)
ENSG00000116251.10_RPL22	RPL22	-0.123133	7.95302	-3.49798	0.000596074	0.00554628	Significantly downregulated (Adj-P<0.01)
ENSG00000105708.8_ZNF14	ZNF14	-0.265623	1.26362	-3.37047	0.000925633	0.00773677	Significantly downregulated (Adj-P<0.01)
ENSG00000155974.12_GRIP1	GRIP1	0.536572	-1.49488	3.28507	0.00123443	0.00958268	Significantly upregulated (Adj-P<0.01)
ENSG00000172458.4_IL17D	IL17D	-0.346995	6.55873	-3.50986	0.000571766	0.00540072	Significantly downregulated (Adj-P<0.01)
ENSG00000205791.3_LOH12CR2	LOH12CR2	0.389534	-1.08274	3.28832	0.00122108	0.00950285	Significantly upregulated (Adj-P<0.01)
ENSG00000118508.4_RAB32	RAB32	0.355616	0.224207	3.33256	0.00105252	0.00849203	Significantly upregulated (Adj-P<0.01)
ENSG00000156030.13_ELMSAN1	ELMSAN1	0.240318	4.58902	3.50983	0.000571829	0.00540072	Significantly upregulated (Adj-P<0.01)
ENSG00000152454.3_ZNF256	ZNF256	-0.233549	1.42731	-3.37964	0.000897153	0.00756723	Significantly downregulated (Adj-P<0.01)
ENSG00000175463.11_TBC1D10C	TBC1D10C	0.482611	0.247953	3.34332	0.00101495	0.00828786	Significantly upregulated (Adj-P<0.01)
ENSG00000250510.7_GPR162	GPR162	0.452471	-0.393137	3.30929	0.00113829	0.00900136	Significantly upregulated (Adj-P<0.01)
ENSG00000135736.5_CCDC102A	CCDC102A	0.330641	0.2471	3.33626	0.00103947	0.00842397	Significantly upregulated (Adj-P<0.01)
ENSG00000148688.13_RPP30	RPP30	-0.1103	3.612	-3.4847	0.000624379	0.00576183	Significantly downregulated (Adj-P<0.01)
ENSG00000180628.14_PCGF5	PCGF5	0.160174	5.5168	3.51024	0.000570996	0.00539935	Significantly upregulated (Adj-P<0.01)
ENSG00000264151.5_AC090403.1	AC090403.1	-0.764135	1.17222	-3.33921	0.00102915	0.00836591	Significantly downregulated (Adj-P<0.01)
ENSG00000140326.13_CDAN1	CDAN1	-0.15627	3.12171	-3.46593	0.000666565	0.00602712	Significantly downregulated (Adj-P<0.01)
ENSG00000155366.16_RHOC	RHOC	0.238135	4.30104	3.50259	0.00058653	0.00550477	Significantly upregulated (Adj-P<0.01)
ENSG00000130203.9_APOE	APOE	0.40797	4.10709	3.49987	0.000592143	0.00552608	Significantly upregulated (Adj-P<0.01)
ENSG00000186335.8_SLC36A2	SLC36A2	-0.254639	6.15692	-3.50359	0.000584468	0.00550354	Significantly downregulated (Adj-P<0.01)
ENSG00000068001.13_HYAL2	HYAL2	0.217001	3.3549	3.47727	0.000640777	0.00586831	Significantly upregulated (Adj-P<0.01)
ENSG00000011105.13_TSPAN9	TSPAN9	0.278575	4.26227	3.49902	0.000593903	0.00553592	Significantly upregulated (Adj-P<0.01)
ENSG00000185946.15_RNPC3	RNPC3	-0.225649	4.94637	-3.50361	0.000584431	0.00550354	Significantly downregulated (Adj-P<0.01)
ENSG00000171885.14_AQP4	AQP4	-0.394416	6.57622	-3.50034	0.000591169	0.00552028	Significantly downregulated (Adj-P<0.01)
ENSG00000049130.15_KITLG	KITLG	0.351982	2.82332	3.44464	0.000717635	0.00636799	Significantly upregulated (Adj-P<0.01)
ENSG00000196586.13_MYO6	MYO6	0.229356	2.43277	3.42183	0.000776402	0.0067669	Significantly upregulated (Adj-P<0.01)
ENSG00000017427.16_IGF1	IGF1	0.404497	3.09119	3.45074	0.000702626	0.0062701	Significantly upregulated (Adj-P<0.01)
ENSG00000104687.13_GSR	GSR	0.168382	4.12311	3.48794	0.000617357	0.00571046	Significantly upregulated (Adj-P<0.01)
ENSG00000198300.13_PEG3	PEG3	0.295387	0.619962	3.32824	0.00106797	0.00859245	Significantly upregulated (Adj-P<0.01)
ENSG00000212978.6_AC016747.1	AC016747.1	0.332545	-0.550443	3.28134	0.00124987	0.00967898	Significantly upregulated (Adj-P<0.01)
ENSG00000112530.11_PACRG	PACRG	-0.332098	-0.656955	-3.27404	0.00128065	0.00984925	Significantly downregulated (Adj-P<0.01)
ENSG00000205659.10_LIN52	LIN52	-0.276199	2.37425	-3.40742	0.000815817	0.00702847	Significantly downregulated (Adj-P<0.01)
ENSG00000102265.11_TIMP1	TIMP1	0.404403	2.29832	3.42739	0.000761665	0.00666808	Significantly upregulated (Adj-P<0.01)
ENSG00000171488.14_LRRC8C	LRRC8C	0.281139	2.52205	3.42136	0.000777663	0.00677081	Significantly upregulated (Adj-P<0.01)
ENSG00000150316.11_CWC15	CWC15	-0.119012	5.36143	-3.49482	0.000602701	0.00559799	Significantly downregulated (Adj-P<0.01)
ENSG00000122862.4_SRGN	SRGN	0.30458	2.6363	3.42504	0.000767874	0.00670001	Significantly upregulated (Adj-P<0.01)
ENSG00000095485.17_CWF19L1	CWF19L1	-0.141294	3.35454	-3.45723	0.000687008	0.00616579	Significantly downregulated (Adj-P<0.01)
ENSG00000162373.12_BEND5	BEND5	-0.207929	1.3692	-3.35726	0.000968126	0.00801512	Significantly downregulated (Adj-P<0.01)
ENSG00000049245.12_VAMP3	VAMP3	-0.107135	5.72874	-3.49115	0.000610483	0.00566022	Significantly downregulated (Adj-P<0.01)
ENSG00000167978.16_SRRM2	SRRM2	-0.160191	9.78642	-3.43964	0.000730131	0.00644956	Significantly downregulated (Adj-P<0.01)
ENSG00000149743.13_TRPT1	TRPT1	0.253243	5.08426	3.4891	0.000614852	0.00569401	Significantly upregulated (Adj-P<0.01)
ENSG00000117868.15_ESYT2	ESYT2	-0.119022	6.1128	-3.48665	0.000620144	0.00573286	Significantly downregulated (Adj-P<0.01)
ENSG00000241990.5_PRR34-AS1	PRR34-AS1	-0.290191	2.82291	-3.44505	0.000716619	0.00636799	Significantly downregulated (Adj-P<0.01)
ENSG00000242261.1_AC018635.1	AC018635.1	-0.519784	-0.415191	-3.27206	0.00128914	0.00989515	Significantly downregulated (Adj-P<0.01)
ENSG00000164124.10_TMEM144	TMEM144	0.286806	0.822289	3.32604	0.00107592	0.00863432	Significantly upregulated (Adj-P<0.01)
ENSG00000180769.8_WDFY3-AS2	WDFY3-AS2	0.330624	1.48619	3.34987	0.000992695	0.00816224	Significantly upregulated (Adj-P<0.01)
ENSG00000041880.14_PARP3	PARP3	0.19923	3.50318	3.462	0.000675719	0.00608884	Significantly upregulated (Adj-P<0.01)
ENSG00000013275.7_PSMC4	PSMC4	-0.122795	4.9679	-3.48507	0.000623566	0.00575772	Significantly downregulated (Adj-P<0.01)
ENSG00000228492.2_RAB11FIP1P1	RAB11FIP1P1	0.335795	0.40474	3.30453	0.00115662	0.00910503	Significantly upregulated (Adj-P<0.01)
ENSG00000089163.4_SIRT4	SIRT4	0.206238	1.64288	3.37227	0.000919974	0.00770351	Significantly upregulated (Adj-P<0.01)
ENSG00000171621.13_SPSB1	SPSB1	-0.351798	3.82445	-3.46271	0.000674062	0.0060774	Significantly downregulated (Adj-P<0.01)
ENSG00000140937.13_CDH11	CDH11	0.414245	0.571222	3.31918	0.00110106	0.00879111	Significantly upregulated (Adj-P<0.01)
ENSG00000128309.16_MPST	MPST	-0.231561	5.48435	-3.48311	0.000627858	0.00579053	Significantly downregulated (Adj-P<0.01)
ENSG00000144815.15_NXPE3	NXPE3	0.183022	6.98508	3.47455	0.000646865	0.00590929	Significantly upregulated (Adj-P<0.01)
ENSG00000106125.14_MINDY4	MINDY4	0.280713	0.339078	3.30907	0.00113913	0.00900351	Significantly upregulated (Adj-P<0.01)
ENSG00000167325.14_RRM1	RRM1	-0.132604	4.97406	-3.48137	0.00063167	0.00580862	Significantly downregulated (Adj-P<0.01)
ENSG00000177981.10_ASB8	ASB8	-0.147415	7.33453	-3.46888	0.000659748	0.00599505	Significantly downregulated (Adj-P<0.01)
ENSG00000135974.9_C2orf49	C2orf49	-0.155375	4.02377	-3.46511	0.000668457	0.00604075	Significantly downregulated (Adj-P<0.01)
ENSG00000260855.1_AL591848.4	AL591848.4	-0.309182	1.21386	-3.33631	0.0010393	0.00842397	Significantly downregulated (Adj-P<0.01)
ENSG00000198842.9_DUSP27	DUSP27	-0.184505	7.22211	-3.46937	0.000658636	0.00598993	Significantly downregulated (Adj-P<0.01)
ENSG00000183154.1_AC138356.1	AC138356.1	0.32396	-0.349132	3.2703	0.00129673	0.00994367	Significantly upregulated (Adj-P<0.01)
ENSG00000123178.14_SPRYD7	SPRYD7	-0.135512	4.48625	-3.47386	0.000648431	0.00591081	Significantly downregulated (Adj-P<0.01)
ENSG00000131389.17_SLC6A6	SLC6A6	-0.294267	4.86878	-3.47904	0.000636819	0.00583877	Significantly downregulated (Adj-P<0.01)
ENSG00000260077.1_AC104794.2	AC104794.2	0.284349	1.28623	3.34539	0.00100786	0.0082398	Significantly upregulated (Adj-P<0.01)
ENSG00000184743.12_ATL3	ATL3	0.217562	3.41629	3.4438	0.000719721	0.00637669	Significantly upregulated (Adj-P<0.01)
ENSG00000100941.8_PNN	PNN	-0.125845	5.70631	-3.47921	0.000636439	0.00583877	Significantly downregulated (Adj-P<0.01)
ENSG00000161544.9_CYGB	CYGB	0.193224	3.15213	3.44057	0.000727801	0.00643259	Significantly upregulated (Adj-P<0.01)
ENSG00000197943.9_PLCG2	PLCG2	0.329292	1.23436	3.34025	0.00102554	0.00834951	Significantly upregulated (Adj-P<0.01)
ENSG00000242485.5_MRPL20	MRPL20	-0.146643	5.64469	-3.47403	0.000648036	0.00591065	Significantly downregulated (Adj-P<0.01)
ENSG00000188846.13_RPL14	RPL14	-0.127403	8.11768	-3.45075	0.000702607	0.0062701	Significantly downregulated (Adj-P<0.01)
ENSG00000103404.14_USP31	USP31	0.237513	3.39243	3.43733	0.000735981	0.00649027	Significantly upregulated (Adj-P<0.01)
ENSG00000284672.1_AC109583.3	AC109583.3	-0.479398	2.87948	-3.41527	0.00079413	0.00688319	Significantly downregulated (Adj-P<0.01)
ENSG00000108001.13_EBF3	EBF3	0.200131	2.78928	3.41297	0.00080042	0.006911	Significantly upregulated (Adj-P<0.01)
ENSG00000171720.9_HDAC3	HDAC3	-0.105627	4.47359	-3.46593	0.000666563	0.00602712	Significantly downregulated (Adj-P<0.01)
ENSG00000135441.7_BLOC1S1	BLOC1S1	-0.220495	5.2538	-3.46796	0.000661873	0.00599505	Significantly downregulated (Adj-P<0.01)
ENSG00000108433.16_GOSR2	GOSR2	-0.0869311	4.20453	-3.46119	0.000677628	0.00609647	Significantly downregulated (Adj-P<0.01)
ENSG00000155868.7_MED7	MED7	-0.135683	3.06401	-3.4197	0.000782115	0.0067903	Significantly downregulated (Adj-P<0.01)
ENSG00000141744.3_PNMT	PNMT	-0.304431	2.9343	-3.4254	0.000766903	0.00669899	Significantly downregulated (Adj-P<0.01)
ENSG00000164294.13_GPX8	GPX8	0.362669	0.549455	3.2987	0.00117941	0.009252	Significantly upregulated (Adj-P<0.01)
ENSG00000123064.12_DDX54	DDX54	-0.162798	5.44181	-3.46857	0.000660459	0.00599505	Significantly downregulated (Adj-P<0.01)
ENSG00000104067.16_TJP1	TJP1	0.205984	4.91206	3.46699	0.000664117	0.0060119	Significantly upregulated (Adj-P<0.01)
ENSG00000185950.8_IRS2	IRS2	-0.330464	4.69185	-3.46294	0.000673525	0.0060774	Significantly downregulated (Adj-P<0.01)
ENSG00000204574.12_ABCF1	ABCF1	-0.115285	6.13381	-3.46467	0.000669474	0.00604645	Significantly downregulated (Adj-P<0.01)
ENSG00000196357.11_ZNF565	ZNF565	-0.167593	1.4504	-3.3286	0.00106668	0.0085865	Significantly downregulated (Adj-P<0.01)
ENSG00000111276.10_CDKN1B	CDKN1B	-0.147176	6.3345	-3.46129	0.000677386	0.00609647	Significantly downregulated (Adj-P<0.01)
ENSG00000179240.9_GVQW3	GVQW3	0.29992	0.0962636	3.27465	0.00127808	0.00983916	Significantly upregulated (Adj-P<0.01)
ENSG00000102886.14_GDPD3	GDPD3	0.268544	-0.200763	3.26871	0.00130357	0.00999127	Significantly upregulated (Adj-P<0.01)
ENSG00000107099.15_DOCK8	DOCK8	0.373396	1.18433	3.32247	0.00108895	0.00871458	Significantly upregulated (Adj-P<0.01)
ENSG00000186501.14_TMEM222	TMEM222	-0.132673	3.80841	-3.44375	0.00071985	0.00637669	Significantly downregulated (Adj-P<0.01)
ENSG00000240654.6_C1QTNF9	C1QTNF9	0.318504	1.68039	3.34868	0.000996706	0.00818268	Significantly upregulated (Adj-P<0.01)
ENSG00000243406.6_MRPS31P5	MRPS31P5	-0.202759	1.32264	-3.32386	0.00108387	0.00868926	Significantly downregulated (Adj-P<0.01)
ENSG00000167515.10_TRAPPC2L	TRAPPC2L	-0.147673	4.06779	-3.44949	0.000705688	0.00629028	Significantly downregulated (Adj-P<0.01)
ENSG00000196724.12_ZNF418	ZNF418	-0.228121	1.5218	-3.33249	0.00105278	0.00849203	Significantly downregulated (Adj-P<0.01)
ENSG00000166526.16_ZNF3	ZNF3	-0.103966	3.73393	-3.43697	0.000736912	0.00649484	Significantly downregulated (Adj-P<0.01)
ENSG00000144857.14_BOC	BOC	0.259971	2.67642	3.4021	0.000830845	0.00713835	Significantly upregulated (Adj-P<0.01)
ENSG00000170296.9_GABARAP	GABARAP	-0.110591	6.97329	-3.44756	0.000710402	0.00632153	Significantly downregulated (Adj-P<0.01)
ENSG00000196504.16_PRPF40A	PRPF40A	-0.137219	5.27122	-3.45858	0.000683792	0.00614044	Significantly downregulated (Adj-P<0.01)
ENSG00000159884.11_CCDC107	CCDC107	-0.228678	3.58646	-3.43169	0.000750457	0.00659571	Significantly downregulated (Adj-P<0.01)
ENSG00000205268.10_PDE7A	PDE7A	-0.220671	5.9823	-3.45643	0.000688899	0.0061757	Significantly downregulated (Adj-P<0.01)
ENSG00000172954.13_LCLAT1	LCLAT1	0.2253	2.00212	3.34976	0.000993058	0.00816224	Significantly upregulated (Adj-P<0.01)
ENSG00000243970.3_PPIEL	PPIEL	-0.232432	2.58493	-3.39204	0.000859957	0.00731793	Significantly downregulated (Adj-P<0.01)
ENSG00000183801.7_OLFML1	OLFML1	0.295154	1.55781	3.33515	0.00104335	0.00844202	Significantly upregulated (Adj-P<0.01)
ENSG00000106355.9_LSM5	LSM5	-0.134195	4.06362	-3.44102	0.000726656	0.00642922	Significantly downregulated (Adj-P<0.01)
ENSG00000102781.13_KATNAL1	KATNAL1	0.194537	3.22166	3.40955	0.000809881	0.006985	Significantly upregulated (Adj-P<0.01)
ENSG00000121931.15_LRIF1	LRIF1	-0.203669	3.1577	-3.40278	0.000828909	0.00712563	Significantly downregulated (Adj-P<0.01)
ENSG00000152219.4_ARL14EP	ARL14EP	-0.150534	4.08329	-3.43653	0.000738037	0.00650111	Significantly downregulated (Adj-P<0.01)
ENSG00000248124.7_RRN3P1	RRN3P1	0.294162	0.871032	3.29433	0.0011968	0.00936965	Significantly upregulated (Adj-P<0.01)
ENSG00000148219.16_ASTN2	ASTN2	-0.220052	2.07702	-3.35842	0.000964324	0.00799208	Significantly downregulated (Adj-P<0.01)
ENSG00000171943.11_SRGAP2C	SRGAP2C	0.286279	1.72635	3.32741	0.00107098	0.00861231	Significantly upregulated (Adj-P<0.01)
ENSG00000136888.6_ATP6V1G1	ATP6V1G1	-0.117367	5.37316	-3.45109	0.000701786	0.00626974	Significantly downregulated (Adj-P<0.01)
ENSG00000169139.11_UBE2V2	UBE2V2	-0.133986	5.24307	-3.44884	0.000707281	0.0063009	Significantly downregulated (Adj-P<0.01)
ENSG00000158966.14_CACHD1	CACHD1	0.259174	1.99377	3.34558	0.00100723	0.0082398	Significantly upregulated (Adj-P<0.01)
ENSG00000175567.8_UCP2	UCP2	0.313745	5.18102	3.44739	0.000710829	0.00632174	Significantly upregulated (Adj-P<0.01)
ENSG00000168792.4_ABHD15	ABHD15	0.255993	1.28344	3.31118	0.00113107	0.00896242	Significantly upregulated (Adj-P<0.01)
ENSG00000095370.19_SH2D3C	SH2D3C	0.250594	2.79377	3.39141	0.000861809	0.00732421	Significantly upregulated (Adj-P<0.01)
ENSG00000184500.15_PROS1	PROS1	0.251916	2.43352	3.36781	0.000934025	0.00778619	Significantly upregulated (Adj-P<0.01)
ENSG00000184445.11_KNTC1	KNTC1	0.22124	1.45308	3.31613	0.00111243	0.00884591	Significantly upregulated (Adj-P<0.01)
ENSG00000167615.16_LENG8	LENG8	-0.163402	7.0778	-3.43066	0.000753122	0.00661423	Significantly downregulated (Adj-P<0.01)
ENSG00000151474.22_FRMD4A	FRMD4A	0.245631	2.46238	3.3681	0.000933117	0.00778275	Significantly upregulated (Adj-P<0.01)
ENSG00000162618.13_ADGRL4	ADGRL4	0.291878	3.09757	3.39296	0.000857255	0.00730925	Significantly upregulated (Adj-P<0.01)
ENSG00000139292.12_LGR5	LGR5	-0.429689	5.45317	-3.44159	0.000725247	0.00642087	Significantly downregulated (Adj-P<0.01)
ENSG00000132463.13_GRSF1	GRSF1	0.163245	7.55286	3.42517	0.000767518	0.00670001	Significantly upregulated (Adj-P<0.01)
ENSG00000144824.20_PHLDB2	PHLDB2	0.438558	2.54788	3.37292	0.000917947	0.00769301	Significantly upregulated (Adj-P<0.01)
ENSG00000087266.15_SH3BP2	SH3BP2	0.15043	4.68073	3.43759	0.000735321	0.0064881	Significantly upregulated (Adj-P<0.01)
ENSG00000170340.10_B3GNT2	B3GNT2	0.28455	0.888976	3.27589	0.00127281	0.00980821	Significantly upregulated (Adj-P<0.01)
ENSG00000116337.15_AMPD2	AMPD2	0.322608	1.35482	3.31616	0.00111232	0.00884591	Significantly upregulated (Adj-P<0.01)
ENSG00000151491.13_EPS8	EPS8	0.191718	3.7696	3.4144	0.000796505	0.00689236	Significantly upregulated (Adj-P<0.01)
ENSG00000166685.11_COG1	COG1	-0.0949969	4.66782	-3.43389	0.000744775	0.00654943	Significantly downregulated (Adj-P<0.01)
ENSG00000113732.8_ATP6V0E1	ATP6V0E1	-0.137257	4.67056	-3.43433	0.000743662	0.00654331	Significantly downregulated (Adj-P<0.01)
ENSG00000070214.15_SLC44A1	SLC44A1	0.183352	3.75775	3.41349	0.00079898	0.00690616	Significantly upregulated (Adj-P<0.01)
ENSG00000106245.10_BUD31	BUD31	-0.151672	3.18241	-3.3943	0.000853323	0.00728364	Significantly downregulated (Adj-P<0.01)
ENSG00000033050.8_ABCF2	ABCF2	-0.131788	5.10808	-3.43456	0.000743062	0.0065417	Significantly downregulated (Adj-P<0.01)
ENSG00000107317.12_PTGDS	PTGDS	0.420948	4.47928	3.43055	0.000753408	0.00661423	Significantly upregulated (Adj-P<0.01)
ENSG00000198795.10_ZNF521	ZNF521	0.307436	0.881472	3.2769	0.00126854	0.00978492	Significantly upregulated (Adj-P<0.01)
ENSG00000084207.16_GSTP1	GSTP1	-0.168986	6.21042	-3.42758	0.00076117	0.00666746	Significantly downregulated (Adj-P<0.01)
ENSG00000109111.14_SUPT6H	SUPT6H	-0.105434	6.16261	-3.42709	0.000762453	0.00667125	Significantly downregulated (Adj-P<0.01)
ENSG00000041802.10_LSG1	LSG1	-0.100922	4.30311	-3.41986	0.000781682	0.0067903	Significantly downregulated (Adj-P<0.01)
ENSG00000140545.14_MFGE8	MFGE8	-0.196082	6.44462	-3.42007	0.000781127	0.0067903	Significantly downregulated (Adj-P<0.01)
ENSG00000168216.11_LMBRD1	LMBRD1	-0.139343	4.92618	-3.42423	0.000770017	0.00671497	Significantly downregulated (Adj-P<0.01)
ENSG00000135776.4_ABCB10	ABCB10	0.135724	4.24477	3.41389	0.000797904	0.00690066	Significantly upregulated (Adj-P<0.01)
ENSG00000182934.11_SRPRA	SRPRA	-0.0999571	6.08519	-3.4206	0.000779699	0.00678433	Significantly downregulated (Adj-P<0.01)
ENSG00000171169.8_NAIF1	NAIF1	-0.169474	2.01144	-3.31741	0.00110766	0.00881691	Significantly downregulated (Adj-P<0.01)
ENSG00000171135.14_JAGN1	JAGN1	-0.139404	3.24803	-3.37883	0.000899622	0.0075799	Significantly downregulated (Adj-P<0.01)
ENSG00000140367.11_UBE2Q2	UBE2Q2	0.309682	4.33435	3.4107	0.000806695	0.00696135	Significantly upregulated (Adj-P<0.01)
ENSG00000100599.15_RIN3	RIN3	0.325015	1.56375	3.30203	0.00116635	0.00916329	Significantly upregulated (Adj-P<0.01)
ENSG00000123415.15_SMUG1	SMUG1	-0.113615	3.51288	-3.38755	0.000873238	0.00740461	Significantly downregulated (Adj-P<0.01)
ENSG00000205560.12_CPT1B	CPT1B	-0.219166	7.06631	-3.40302	0.000828212	0.00712353	Significantly downregulated (Adj-P<0.01)
ENSG00000132323.8_ILKAP	ILKAP	-0.13761	4.22378	-3.40418	0.00082493	0.00710308	Significantly downregulated (Adj-P<0.01)
ENSG00000009709.11_PAX7	PAX7	0.293103	2.74308	3.35802	0.000965617	0.00799857	Significantly upregulated (Adj-P<0.01)
ENSG00000169972.11_PUSL1	PUSL1	-0.210723	1.66369	-3.30291	0.00116292	0.00915004	Significantly downregulated (Adj-P<0.01)
ENSG00000069122.18_ADGRF5	ADGRF5	0.295578	5.16813	3.41297	0.000800408	0.006911	Significantly upregulated (Adj-P<0.01)
ENSG00000166317.11_SYNPO2L	SYNPO2L	-0.166536	8.47499	-3.38376	0.000884631	0.00747366	Significantly downregulated (Adj-P<0.01)
ENSG00000100968.13_NFATC4	NFATC4	0.223392	2.33196	3.33625	0.00103951	0.00842397	Significantly upregulated (Adj-P<0.01)
ENSG00000105048.16_TNNT1	TNNT1	-0.324014	12.5171	-3.318	0.00110544	0.00880371	Significantly downregulated (Adj-P<0.01)
ENSG00000101938.14_CHRDL1	CHRDL1	0.494468	2.56473	3.34618	0.00100519	0.00823509	Significantly upregulated (Adj-P<0.01)
ENSG00000122026.10_RPL21	RPL21	-0.146456	8.15503	-3.37946	0.000897699	0.00756777	Significantly downregulated (Adj-P<0.01)
ENSG00000129460.15_NGDN	NGDN	-0.11895	3.55162	-3.37672	0.000906124	0.0076306	Significantly downregulated (Adj-P<0.01)
ENSG00000172465.13_TCEAL1	TCEAL1	-0.147592	4.29202	-3.39556	0.000849659	0.00726421	Significantly downregulated (Adj-P<0.01)
ENSG00000088876.11_ZNF343	ZNF343	-0.13287	2.69934	-3.33515	0.00104335	0.00844202	Significantly downregulated (Adj-P<0.01)
ENSG00000115414.18_FN1	FN1	0.445155	5.7157	3.40155	0.000832398	0.00714529	Significantly upregulated (Adj-P<0.01)
ENSG00000135363.11_LMO2	LMO2	0.275924	4.15759	3.39374	0.000854955	0.0072936	Significantly upregulated (Adj-P<0.01)
ENSG00000114383.9_TUSC2	TUSC2	-0.154819	4.43792	-3.39706	0.000845313	0.00724284	Significantly downregulated (Adj-P<0.01)
ENSG00000231628.1_AL133406.2	AL133406.2	-0.316421	1.83429	-3.28908	0.00121801	0.00948838	Significantly downregulated (Adj-P<0.01)
ENSG00000138385.15_SSB	SSB	-0.0941555	5.00116	-3.4015	0.000832562	0.00714529	Significantly downregulated (Adj-P<0.01)
ENSG00000072062.13_PRKACA	PRKACA	0.140157	7.49015	3.38452	0.000882335	0.00746229	Significantly upregulated (Adj-P<0.01)
ENSG00000166377.20_ATP9B	ATP9B	-0.165564	3.44284	-3.36703	0.000936531	0.00780293	Significantly downregulated (Adj-P<0.01)
ENSG00000132792.18_CTNNBL1	CTNNBL1	-0.126738	3.64114	-3.37372	0.000915438	0.00767609	Significantly downregulated (Adj-P<0.01)
ENSG00000158301.18_GPRASP2	GPRASP2	-0.180656	2.99505	-3.33994	0.00102662	0.00835402	Significantly downregulated (Adj-P<0.01)
ENSG00000138678.10_GPAT3	GPAT3	-0.246045	4.20872	-3.38496	0.000881001	0.00745502	Significantly downregulated (Adj-P<0.01)
ENSG00000141526.16_SLC16A3	SLC16A3	0.637086	6.12509	3.39474	0.00085206	0.00727681	Significantly upregulated (Adj-P<0.01)
ENSG00000089022.13_MAPKAPK5	MAPKAPK5	-0.110347	4.49261	-3.39099	0.000863038	0.00733068	Significantly downregulated (Adj-P<0.01)
ENSG00000163468.14_CCT3	CCT3	-0.121136	6.1932	-3.39221	0.000859441	0.00731793	Significantly downregulated (Adj-P<0.01)
ENSG00000110906.12_KCTD10	KCTD10	0.148079	3.55828	3.36873	0.000931119	0.00777022	Significantly upregulated (Adj-P<0.01)
ENSG00000165006.13_UBAP1	UBAP1	-0.107399	5.52836	-3.39508	0.000851066	0.00727228	Significantly downregulated (Adj-P<0.01)
ENSG00000149792.8_MRPL49	MRPL49	-0.101935	4.27695	-3.38504	0.000880764	0.00745502	Significantly downregulated (Adj-P<0.01)
ENSG00000183336.8_BOLA2	BOLA2	0.218624	1.49534	3.2781	0.00126344	0.00975673	Significantly upregulated (Adj-P<0.01)
ENSG00000100577.18_GSTZ1	GSTZ1	0.157116	3.91601	3.37586	0.000908779	0.00764475	Significantly upregulated (Adj-P<0.01)
ENSG00000116863.10_ADPRHL2	ADPRHL2	-0.152091	3.92092	-3.37426	0.00091377	0.00766889	Significantly downregulated (Adj-P<0.01)
ENSG00000065548.17_ZC3H15	ZC3H15	-0.109658	4.8695	-3.38742	0.000873628	0.00740461	Significantly downregulated (Adj-P<0.01)
ENSG00000162704.15_ARPC5	ARPC5	0.2268	3.11887	3.34096	0.0010231	0.00833396	Significantly upregulated (Adj-P<0.01)
ENSG00000100320.22_RBFOX2	RBFOX2	-0.144902	7.3048	-3.37488	0.000911825	0.00766216	Significantly downregulated (Adj-P<0.01)
ENSG00000177951.17_BET1L	BET1L	-0.113171	3.6336	-3.36389	0.000946585	0.00787244	Significantly downregulated (Adj-P<0.01)
ENSG00000167508.11_MVD	MVD	-0.218734	4.14554	-3.37433	0.000913549	0.00766889	Significantly downregulated (Adj-P<0.01)
ENSG00000184900.15_SUMO3	SUMO3	-0.095865	5.66706	-3.38316	0.000886433	0.00748082	Significantly downregulated (Adj-P<0.01)
ENSG00000115306.15_SPTBN1	SPTBN1	0.204831	7.24586	3.37155	0.000922231	0.00771655	Significantly upregulated (Adj-P<0.01)
ENSG00000273899.4_NOL12	NOL12	-0.161905	2.48421	-3.30794	0.00114346	0.00902405	Significantly downregulated (Adj-P<0.01)
ENSG00000161013.16_MGAT4B	MGAT4B	0.130472	4.32495	3.37415	0.000914091	0.00766889	Significantly upregulated (Adj-P<0.01)
ENSG00000160299.16_PCNT	PCNT	-0.183218	8.10361	-3.35681	0.000969591	0.00802302	Significantly downregulated (Adj-P<0.01)
ENSG00000105732.12_ZNF574	ZNF574	-0.142002	3.10317	-3.33344	0.00104942	0.00847361	Significantly downregulated (Adj-P<0.01)
ENSG00000108298.11_RPL19	RPL19	-0.114142	8.4996	-3.34321	0.00101533	0.00828786	Significantly downregulated (Adj-P<0.01)
ENSG00000165716.10_FAM69B	FAM69B	0.267076	1.85154	3.27858	0.00126146	0.00974943	Significantly upregulated (Adj-P<0.01)
ENSG00000165626.17_BEND7	BEND7	0.159018	3.62436	3.3447	0.00101022	0.00825476	Significantly upregulated (Adj-P<0.01)
ENSG00000273151.1_AC073957.3	AC073957.3	0.205763	2.48396	3.30252	0.00116443	0.00915732	Significantly upregulated (Adj-P<0.01)
ENSG00000170085.17_SIMC1	SIMC1	0.212135	2.48758	3.29183	0.00120687	0.0094297	Significantly upregulated (Adj-P<0.01)
ENSG00000166086.12_JAM3	JAM3	0.246013	2.47643	3.29671	0.00118733	0.00930943	Significantly upregulated (Adj-P<0.01)
ENSG00000105220.15_GPI	GPI	0.164388	8.26149	3.34289	0.00101644	0.00829264	Significantly upregulated (Adj-P<0.01)
ENSG00000104886.11_PLEKHJ1	PLEKHJ1	-0.18767	5.08456	-3.36916	0.000929747	0.00776289	Significantly downregulated (Adj-P<0.01)
ENSG00000145945.6_FAM50B	FAM50B	-0.202978	4.49402	-3.36285	0.000949917	0.00789352	Significantly downregulated (Adj-P<0.01)
ENSG00000182796.14_TMEM198B	TMEM198B	0.196588	2.18474	3.28493	0.001235	0.00958268	Significantly upregulated (Adj-P<0.01)
ENSG00000176155.18_CCDC57	CCDC57	0.173165	3.08579	3.32666	0.00107368	0.00862071	Significantly upregulated (Adj-P<0.01)
ENSG00000137502.9_RAB30	RAB30	0.25719	4.00811	3.34927	0.000994703	0.00817051	Significantly upregulated (Adj-P<0.01)
ENSG00000138750.14_NUP54	NUP54	-0.143315	3.60826	-3.33488	0.00104432	0.00844546	Significantly downregulated (Adj-P<0.01)
ENSG00000125844.15_RRBP1	RRBP1	0.216563	4.1732	3.35548	0.000973982	0.00805511	Significantly upregulated (Adj-P<0.01)
ENSG00000138785.14_INTS12	INTS12	-0.120158	3.1823	-3.31815	0.00110488	0.00880371	Significantly downregulated (Adj-P<0.01)
ENSG00000172037.13_LAMB2	LAMB2	0.16084	7.07264	3.34978	0.000992987	0.00816224	Significantly upregulated (Adj-P<0.01)
ENSG00000176783.14_RUFY1	RUFY1	-0.099261	4.40473	-3.35462	0.000976826	0.00807013	Significantly downregulated (Adj-P<0.01)
ENSG00000120156.20_TEK	TEK	0.322429	3.113	3.31118	0.00113108	0.00896242	Significantly upregulated (Adj-P<0.01)
ENSG00000134287.9_ARF3	ARF3	0.202527	3.59687	3.33643	0.00103887	0.00842397	Significantly upregulated (Adj-P<0.01)
ENSG00000163964.14_PIGX	PIGX	0.148497	3.70224	3.33391	0.00104775	0.00846449	Significantly upregulated (Adj-P<0.01)
ENSG00000130300.8_PLVAP	PLVAP	0.393732	3.11713	3.32239	0.00108925	0.00871458	Significantly upregulated (Adj-P<0.01)
ENSG00000185651.14_UBE2L3	UBE2L3	-0.0783403	5.54826	-3.35865	0.00096357	0.00799005	Significantly downregulated (Adj-P<0.01)
ENSG00000110237.4_ARHGEF17	ARHGEF17	0.225191	4.31233	3.35137	0.000987644	0.00813808	Significantly upregulated (Adj-P<0.01)
ENSG00000163170.11_BOLA3	BOLA3	0.195733	3.99073	3.34553	0.00100738	0.0082398	Significantly upregulated (Adj-P<0.01)
ENSG00000135916.15_ITM2C	ITM2C	0.208672	3.13179	3.3188	0.00110247	0.0087979	Significantly upregulated (Adj-P<0.01)
ENSG00000164056.10_SPRY1	SPRY1	0.156718	4.32551	3.34799	0.000999043	0.0081933	Significantly upregulated (Adj-P<0.01)
ENSG00000102898.11_NUTF2	NUTF2	-0.107115	4.84304	-3.35175	0.000986396	0.00813808	Significantly downregulated (Adj-P<0.01)
ENSG00000270647.5_TAF15	TAF15	-0.13542	6.35546	-3.34844	0.000997507	0.00818498	Significantly downregulated (Adj-P<0.01)
ENSG00000117691.9_NENF	NENF	-0.181913	5.00432	-3.35055	0.000990412	0.00815661	Significantly downregulated (Adj-P<0.01)
ENSG00000133624.13_ZNF767P	ZNF767P	-0.1312	3.24764	-3.31162	0.00112941	0.00895823	Significantly downregulated (Adj-P<0.01)
ENSG00000156515.23_HK1	HK1	0.148326	6.98446	3.33977	0.00102719	0.00835431	Significantly upregulated (Adj-P<0.01)
ENSG00000111667.13_USP5	USP5	-0.129475	5.61412	-3.34973	0.000993175	0.00816224	Significantly downregulated (Adj-P<0.01)
ENSG00000130699.18_TAF4	TAF4	-0.149605	3.75154	-3.32253	0.00108872	0.00871458	Significantly downregulated (Adj-P<0.01)
ENSG00000117114.19_ADGRL2	ADGRL2	0.305069	2.76161	3.27433	0.00127941	0.00984454	Significantly upregulated (Adj-P<0.01)
ENSG00000136518.16_ACTL6A	ACTL6A	-0.126262	3.02203	-3.29275	0.00120315	0.00940527	Significantly downregulated (Adj-P<0.01)
ENSG00000148296.6_SURF6	SURF6	-0.133868	4.63517	-3.34261	0.00101738	0.00829598	Significantly downregulated (Adj-P<0.01)
ENSG00000171490.12_RSL1D1	RSL1D1	-0.122237	6.70394	-3.33842	0.0010319	0.00837958	Significantly downregulated (Adj-P<0.01)
[truncated: 51 more rows]

## Sheet: metPRT (16-weeks vs Baseline)
DEG in metPRT
ENSEMBL ID	HUGO Gene Symbol	logFC	AveExpr	t	P.Value	adj.P.Val	group
ENSG00000107821.14_KAZALD1	KAZALD1	1.0326	1.84832	7.85509	4.06e-13	5.47e-09	Significantly upregulated (Adj-P<0.01)
ENSG00000159228.12_CBR1	CBR1	0.630259	3.4442	7.63442	1.47e-12	5.47e-09	Significantly upregulated (Adj-P<0.01)
ENSG00000179044.15_EXOC3L1	EXOC3L1	1.00295	0.323284	7.70591	9.72e-13	5.47e-09	Significantly upregulated (Adj-P<0.01)
ENSG00000075618.17_FSCN1	FSCN1	0.868737	2.38855	7.62525	1.55e-12	5.47e-09	Significantly upregulated (Adj-P<0.01)
ENSG00000204262.12_COL5A2	COL5A2	0.796877	3.82973	7.60544	1.74e-12	5.47e-09	Significantly upregulated (Adj-P<0.01)
ENSG00000162745.10_OLFML2B	OLFML2B	0.869405	2.44251	7.51611	2.92e-12	7.64e-09	Significantly upregulated (Adj-P<0.01)
ENSG00000168542.14_COL3A1	COL3A1	1.37657	6.08083	7.42862	4.83e-12	1.08e-08	Significantly upregulated (Adj-P<0.01)
ENSG00000108821.13_COL1A1	COL1A1	1.52069	4.67081	7.15031	2.34e-11	4.59e-08	Significantly upregulated (Adj-P<0.01)
ENSG00000137404.14_NRM	NRM	0.61839	0.114968	7.11726	2.82e-11	4.92e-08	Significantly upregulated (Adj-P<0.01)
ENSG00000130508.10_PXDN	PXDN	0.712371	3.59397	6.99926	5.45e-11	8.55e-08	Significantly upregulated (Adj-P<0.01)
ENSG00000187498.15_COL4A1	COL4A1	0.879039	5.80191	6.92707	8.13e-11	1.03e-07	Significantly upregulated (Adj-P<0.01)
ENSG00000113296.14_THBS4	THBS4	1.02743	5.62697	6.91124	8.87e-11	1.03e-07	Significantly upregulated (Adj-P<0.01)
ENSG00000205302.6_SNX2	SNX2	-0.206778	4.29395	-6.90524	9.17e-11	1.03e-07	Significantly downregulated (Adj-P<0.01)
ENSG00000128656.13_CHN1	CHN1	0.783013	-0.0888748	6.95771	6.86e-11	9.79e-08	Significantly upregulated (Adj-P<0.01)
ENSG00000185787.14_MORF4L1	MORF4L1	-0.168699	7.69282	-6.84822	1.26e-10	1.31e-07	Significantly downregulated (Adj-P<0.01)
ENSG00000130635.15_COL5A1	COL5A1	0.756814	4.23681	6.71877	2.55e-10	2.35e-07	Significantly upregulated (Adj-P<0.01)
ENSG00000167881.14_SRP68	SRP68	-0.167186	6.08174	-6.69929	2.83e-10	2.46e-07	Significantly downregulated (Adj-P<0.01)
ENSG00000268996.3_MAN1B1-DT	MAN1B1-DT	0.70948	0.44608	6.69031	2.97e-10	2.46e-07	Significantly upregulated (Adj-P<0.01)
ENSG00000139644.12_TMBIM6	TMBIM6	-0.235073	7.33917	-6.60164	4.8e-10	3.59e-07	Significantly downregulated (Adj-P<0.01)
ENSG00000134871.18_COL4A2	COL4A2	0.770018	5.8189	6.60483	4.72e-10	3.59e-07	Significantly upregulated (Adj-P<0.01)
ENSG00000187634.11_SAMD11	SAMD11	1.70675	-1.83427	6.82906	1.39e-10	1.37e-07	Significantly upregulated (Adj-P<0.01)
ENSG00000113140.10_SPARC	SPARC	0.662562	7.17538	6.55102	6.31e-10	4.5e-07	Significantly upregulated (Adj-P<0.01)
ENSG00000108953.16_YWHAE	YWHAE	-0.181159	8.24078	-6.53676	6.81e-10	4.65e-07	Significantly downregulated (Adj-P<0.01)
ENSG00000109061.9_MYH1	MYH1	-2.18335	11.8263	-6.52276	7.34e-10	4.8e-07	Significantly downregulated (Adj-P<0.01)
ENSG00000101825.7_MXRA5	MXRA5	1.54969	1.86725	6.51208	7.77e-10	4.81e-07	Significantly upregulated (Adj-P<0.01)
ENSG00000142188.16_TMEM50B	TMEM50B	-0.247242	4.77191	-6.50747	7.96e-10	4.81e-07	Significantly downregulated (Adj-P<0.01)
ENSG00000182492.15_BGN	BGN	1.09326	2.72664	6.48424	9.01e-10	5.13e-07	Significantly upregulated (Adj-P<0.01)
ENSG00000167123.18_CERCAM	CERCAM	0.742398	2.5296	6.45991	1.03e-09	5.47e-07	Significantly upregulated (Adj-P<0.01)
ENSG00000110697.12_PITPNM1	PITPNM1	0.781191	2.4528	6.44846	1.09e-09	5.52e-07	Significantly upregulated (Adj-P<0.01)
ENSG00000106025.8_TSPAN12	TSPAN12	0.635686	0.91691	6.4565	1.05e-09	5.47e-07	Significantly upregulated (Adj-P<0.01)
ENSG00000265751.1_AC015878.1		0.977011	2.0729	6.40917	1.34e-09	6.59e-07	Significantly upregulated (Adj-P<0.01)
ENSG00000198885.9_ITPRIPL1	ITPRIPL1	0.776699	-0.667451	6.48149	9.15e-10	5.13e-07	Significantly upregulated (Adj-P<0.01)
ENSG00000115875.18_SRSF7	SRSF7	-0.235891	4.88905	-6.38153	1.56e-09	7.4e-07	Significantly downregulated (Adj-P<0.01)
ENSG00000182934.11_SRPRA	SRPRA	-0.196397	6.08519	-6.37195	1.64e-09	7.55e-07	Significantly downregulated (Adj-P<0.01)
ENSG00000102978.12_POLR2C	POLR2C	-0.192864	5.3493	-6.36148	1.73e-09	7.75e-07	Significantly downregulated (Adj-P<0.01)
ENSG00000119048.7_UBE2B	UBE2B	-0.267031	7.07936	-6.32512	2.09e-09	9.13e-07	Significantly downregulated (Adj-P<0.01)
ENSG00000090924.14_PLEKHG2	PLEKHG2	0.523995	2.4687	6.28051	2.65e-09	1.12e-06	Significantly upregulated (Adj-P<0.01)
ENSG00000116793.15_PHTF1	PHTF1	0.452508	1.21844	6.2673	2.84e-09	1.17e-06	Significantly upregulated (Adj-P<0.01)
ENSG00000204856.11_FAM216A	FAM216A	0.514583	0.782204	6.2171	3.68e-09	1.48e-06	Significantly upregulated (Adj-P<0.01)
ENSG00000136160.15_EDNRB	EDNRB	0.646417	1.78735	6.17717	4.53e-09	1.74e-06	Significantly upregulated (Adj-P<0.01)
ENSG00000236104.2_ZBTB22	ZBTB22	0.420943	2.27521	6.14366	5.39e-09	1.95e-06	Significantly upregulated (Adj-P<0.01)
ENSG00000186603.5_HPDL	HPDL	0.827048	-0.396613	6.19492	4.13e-09	1.62e-06	Significantly upregulated (Adj-P<0.01)
ENSG00000123444.13_KBTBD4	KBTBD4	-0.219704	4.08946	-6.14506	5.35e-09	1.95e-06	Significantly downregulated (Adj-P<0.01)
ENSG00000154096.13_THY1	THY1	1.31274	1.08523	6.12498	5.94e-09	1.98e-06	Significantly upregulated (Adj-P<0.01)
ENSG00000101306.10_MYLK2	MYLK2	-0.636302	8.74138	-6.13051	5.77e-09	1.98e-06	Significantly downregulated (Adj-P<0.01)
ENSG00000187742.14_SECISBP2	SECISBP2	-0.232035	5.07859	-6.14139	5.46e-09	1.95e-06	Significantly downregulated (Adj-P<0.01)
ENSG00000182871.14_COL18A1	COL18A1	0.611025	4.60028	6.09799	6.82e-09	2.19e-06	Significantly upregulated (Adj-P<0.01)
ENSG00000173894.10_CBX2	CBX2	0.815925	-0.455654	6.12868	5.83e-09	1.98e-06	Significantly upregulated (Adj-P<0.01)
ENSG00000134013.15_LOXL2	LOXL2	0.814303	1.45698	6.0595	8.32e-09	2.46e-06	Significantly upregulated (Adj-P<0.01)
ENSG00000173264.14_GPR137	GPR137	0.428815	2.16982	6.05993	8.3e-09	2.46e-06	Significantly upregulated (Adj-P<0.01)
ENSG00000130962.17_PRRG1	PRRG1	-0.451044	4.52008	-6.07089	7.84e-09	2.46e-06	Significantly downregulated (Adj-P<0.01)
ENSG00000138668.18_HNRNPD	HNRNPD	-0.161054	6.31156	-6.06565	8.06e-09	2.46e-06	Significantly downregulated (Adj-P<0.01)
ENSG00000162734.12_PEA15	PEA15	0.416801	5.14698	6.00313	1.11e-08	3.22e-06	Significantly upregulated (Adj-P<0.01)
ENSG00000164692.17_COL1A2	COL1A2	0.914993	6.09226	5.98233	1.23e-08	3.52e-06	Significantly upregulated (Adj-P<0.01)
ENSG00000162572.20_SCNN1D	SCNN1D	0.470395	1.92476	5.95107	1.45e-08	3.97e-06	Significantly upregulated (Adj-P<0.01)
ENSG00000167535.7_CACNB3	CACNB3	0.601305	0.40314	5.95074	1.45e-08	3.97e-06	Significantly upregulated (Adj-P<0.01)
ENSG00000204054.13_LINC00963	LINC00963	0.628489	3.12678	5.9465	1.48e-08	3.97e-06	Significantly upregulated (Adj-P<0.01)
ENSG00000168487.18_BMP1	BMP1	0.43012	3.14949	5.94493	1.49e-08	3.97e-06	Significantly upregulated (Adj-P<0.01)
ENSG00000167210.17_LOXHD1	LOXHD1	1.2973	-1.65039	6.10308	6.65e-09	2.17e-06	Significantly upregulated (Adj-P<0.01)
ENSG00000164683.16_HEY1	HEY1	0.584448	2.18413	5.92351	1.66e-08	4.35e-06	Significantly upregulated (Adj-P<0.01)
ENSG00000161328.10_LRRC56	LRRC56	0.895175	0.778121	5.90702	1.81e-08	4.65e-06	Significantly upregulated (Adj-P<0.01)
ENSG00000145014.17_TMEM44	TMEM44	0.428215	1.16843	5.89561	1.91e-08	4.77e-06	Significantly upregulated (Adj-P<0.01)
ENSG00000131069.19_ACSS2	ACSS2	-0.253988	6.90696	-5.90097	1.86e-08	4.71e-06	Significantly downregulated (Adj-P<0.01)
ENSG00000167676.4_PLIN4	PLIN4	-0.512916	8.76795	-5.87637	2.11e-08	5.17e-06	Significantly downregulated (Adj-P<0.01)
ENSG00000115738.9_ID2	ID2	0.684021	1.50079	5.84109	2.52e-08	5.81e-06	Significantly upregulated (Adj-P<0.01)
ENSG00000138080.13_EMILIN1	EMILIN1	0.523805	3.06683	5.84092	2.52e-08	5.81e-06	Significantly upregulated (Adj-P<0.01)
ENSG00000126945.8_HNRNPH2	HNRNPH2	-0.18438	5.69667	-5.84685	2.44e-08	5.81e-06	Significantly downregulated (Adj-P<0.01)
ENSG00000214944.9_ARHGEF28	ARHGEF28	0.621073	-0.00778135	5.83825	2.55e-08	5.81e-06	Significantly upregulated (Adj-P<0.01)
ENSG00000100399.15_CHADL	CHADL	0.518907	0.467719	5.80816	2.97e-08	6.47e-06	Significantly upregulated (Adj-P<0.01)
ENSG00000144152.12_FBLN7	FBLN7	0.753406	-0.448425	5.84696	2.44e-08	5.81e-06	Significantly upregulated (Adj-P<0.01)
ENSG00000167244.19_IGF2	IGF2	0.623626	6.16858	5.80802	2.97e-08	6.47e-06	Significantly upregulated (Adj-P<0.01)
ENSG00000114859.15_CLCN2	CLCN2	0.431574	0.390121	5.77045	3.58e-08	7.57e-06	Significantly upregulated (Adj-P<0.01)
ENSG00000166295.8_ANAPC16	ANAPC16	-0.212558	7.1779	-5.76996	3.59e-08	7.57e-06	Significantly downregulated (Adj-P<0.01)
ENSG00000070808.15_CAMK2A	CAMK2A	-0.320427	7.2806	-5.76848	3.62e-08	7.57e-06	Significantly downregulated (Adj-P<0.01)
ENSG00000136295.14_TTYH3	TTYH3	0.514894	1.86437	5.72839	4.41e-08	8.88e-06	Significantly upregulated (Adj-P<0.01)
ENSG00000132475.10_H3F3B	H3F3B	-0.314933	7.08828	-5.74776	4.01e-08	8.28e-06	Significantly downregulated (Adj-P<0.01)
ENSG00000143061.17_IGSF3	IGSF3	0.586741	1.45116	5.701	5.05e-08	9.91e-06	Significantly upregulated (Adj-P<0.01)
ENSG00000091136.13_LAMB1	LAMB1	0.605914	4.63019	5.7286	4.41e-08	8.88e-06	Significantly upregulated (Adj-P<0.01)
ENSG00000177613.8_CSTF2T	CSTF2T	-0.254914	4.84955	-5.70298	5e-08	9.91e-06	Significantly downregulated (Adj-P<0.01)
ENSG00000223768.2_LINC00205	LINC00205	0.443024	1.3984	5.6645	6.05e-08	1.16e-05	Significantly upregulated (Adj-P<0.01)
ENSG00000164932.12_CTHRC1	CTHRC1	0.793213	0.148384	5.66304	6.09e-08	1.16e-05	Significantly upregulated (Adj-P<0.01)
ENSG00000261167.1_AC107027.3		-0.364859	2.14946	-5.63521	6.98e-08	1.29e-05	Significantly downregulated (Adj-P<0.01)
ENSG00000178913.7_TAF7	TAF7	-0.179994	6.58337	-5.66172	6.13e-08	1.16e-05	Significantly downregulated (Adj-P<0.01)
ENSG00000204291.10_COL15A1	COL15A1	0.526207	5.91681	5.65895	6.21e-08	1.16e-05	Significantly upregulated (Adj-P<0.01)
ENSG00000105472.12_CLEC11A	CLEC11A	0.71629	0.132992	5.62932	7.19e-08	1.31e-05	Significantly upregulated (Adj-P<0.01)
ENSG00000106819.11_ASPN	ASPN	0.893017	2.02479	5.60973	7.91e-08	1.39e-05	Significantly upregulated (Adj-P<0.01)
ENSG00000213906.9_LTB4R2	LTB4R2	0.539227	1.06813	5.60529	8.08e-08	1.39e-05	Significantly upregulated (Adj-P<0.01)
ENSG00000166106.3_ADAMTS15	ADAMTS15	0.571723	1.36224	5.58987	8.71e-08	1.47e-05	Significantly upregulated (Adj-P<0.01)
ENSG00000063180.8_CA11	CA11	0.484023	1.25278	5.58823	8.78e-08	1.47e-05	Significantly upregulated (Adj-P<0.01)
ENSG00000103145.10_HCFC1R1	HCFC1R1	0.617776	6.04484	5.62261	7.43e-08	1.32e-05	Significantly upregulated (Adj-P<0.01)
ENSG00000160058.18_BSDC1	BSDC1	-0.166059	5.15328	-5.625	7.34e-08	1.32e-05	Significantly downregulated (Adj-P<0.01)
ENSG00000171208.9_NETO2	NETO2	0.596747	1.06956	5.57637	9.31e-08	1.51e-05	Significantly upregulated (Adj-P<0.01)
ENSG00000125089.16_SH3TC1	SH3TC1	0.621932	1.37466	5.57621	9.31e-08	1.51e-05	Significantly upregulated (Adj-P<0.01)
ENSG00000136830.11_FAM129B	FAM129B	0.385597	3.69565	5.60076	8.26e-08	1.41e-05	Significantly upregulated (Adj-P<0.01)
ENSG00000136504.11_KAT7	KAT7	-0.206917	5.1803	-5.60803	7.97e-08	1.39e-05	Significantly downregulated (Adj-P<0.01)
ENSG00000077274.8_CAPN6	CAPN6	0.9271	1.67432	5.55764	1.02e-07	1.57e-05	Significantly upregulated (Adj-P<0.01)
ENSG00000160867.14_FGFR4	FGFR4	0.505726	2.42772	5.55767	1.02e-07	1.57e-05	Significantly upregulated (Adj-P<0.01)
ENSG00000159593.14_NAE1	NAE1	-0.177364	4.21473	-5.57504	9.37e-08	1.51e-05	Significantly downregulated (Adj-P<0.01)
ENSG00000161057.11_PSMC2	PSMC2	-0.144786	6.30686	-5.57351	9.44e-08	1.51e-05	Significantly downregulated (Adj-P<0.01)
ENSG00000141905.18_NFIC	NFIC	-0.283775	8.00151	-5.56112	1e-07	1.57e-05	Significantly downregulated (Adj-P<0.01)
ENSG00000156508.17_EEF1A1	EEF1A1	0.561531	8.9774	5.552	1.05e-07	1.6e-05	Significantly upregulated (Adj-P<0.01)
ENSG00000173801.16_JUP	JUP	-0.367234	6.23274	-5.56721	9.73e-08	1.54e-05	Significantly downregulated (Adj-P<0.01)
ENSG00000136378.14_ADAMTS7	ADAMTS7	0.632958	1.11581	5.52163	1.21e-07	1.81e-05	Significantly upregulated (Adj-P<0.01)
ENSG00000179627.9_ZBTB42	ZBTB42	0.367557	2.25333	5.52781	1.18e-07	1.78e-05	Significantly upregulated (Adj-P<0.01)
ENSG00000279117.1_AP001972.5		0.533768	0.534139	5.50298	1.33e-07	1.95e-05	Significantly upregulated (Adj-P<0.01)
ENSG00000008283.15_CYB561	CYB561	0.473313	1.72284	5.50127	1.34e-07	1.95e-05	Significantly upregulated (Adj-P<0.01)
ENSG00000181104.6_F2R	F2R	0.65293	1.65993	5.49602	1.37e-07	1.96e-05	Significantly upregulated (Adj-P<0.01)
ENSG00000115129.13_TP53I3	TP53I3	0.660203	0.830306	5.48491	1.45e-07	1.99e-05	Significantly upregulated (Adj-P<0.01)
ENSG00000148773.13_MKI67	MKI67	1.99659	-2.37573	5.80804	2.97e-08	6.47e-06	Significantly upregulated (Adj-P<0.01)
ENSG00000247271.6_ZBED5-AS1	ZBED5-AS1	0.372798	1.6473	5.47047	1.55e-07	2.08e-05	Significantly upregulated (Adj-P<0.01)
ENSG00000182533.6_CAV3	CAV3	-0.306192	5.86197	-5.49807	1.36e-07	1.96e-05	Significantly downregulated (Adj-P<0.01)
ENSG00000185189.17_NRBP2	NRBP2	0.331478	3.96907	5.48885	1.42e-07	1.99e-05	Significantly upregulated (Adj-P<0.01)
ENSG00000177889.9_UBE2N	UBE2N	-0.161527	5.42267	-5.49031	1.41e-07	1.99e-05	Significantly downregulated (Adj-P<0.01)
ENSG00000285043.1_AC093512.2		-0.315241	7.09659	-5.48414	1.45e-07	1.99e-05	Significantly downregulated (Adj-P<0.01)
ENSG00000123562.16_MORF4L2	MORF4L2	-0.174188	6.4783	-5.48544	1.45e-07	1.99e-05	Significantly downregulated (Adj-P<0.01)
ENSG00000083814.13_ZNF671	ZNF671	-0.295084	3.30276	-5.46539	1.59e-07	2.1e-05	Significantly downregulated (Adj-P<0.01)
ENSG00000105711.11_SCN1B	SCN1B	-0.296246	7.77548	-5.46884	1.57e-07	2.08e-05	Significantly downregulated (Adj-P<0.01)
ENSG00000069535.13_MAOB	MAOB	-0.274643	6.5201	-5.47048	1.55e-07	2.08e-05	Significantly downregulated (Adj-P<0.01)
ENSG00000130787.13_HIP1R	HIP1R	0.414246	2.74003	5.44146	1.79e-07	2.28e-05	Significantly upregulated (Adj-P<0.01)
ENSG00000179772.7_FOXS1	FOXS1	0.888846	-1.1636	5.50482	1.32e-07	1.95e-05	Significantly upregulated (Adj-P<0.01)
ENSG00000272047.2_GTF2H5	GTF2H5	-0.208289	5.03171	-5.46213	1.62e-07	2.12e-05	Significantly downregulated (Adj-P<0.01)
ENSG00000113558.18_SKP1	SKP1	-0.186647	7.54338	-5.45195	1.7e-07	2.2e-05	Significantly downregulated (Adj-P<0.01)
ENSG00000108840.15_HDAC5	HDAC5	-0.258797	6.4928	-5.44259	1.78e-07	2.28e-05	Significantly downregulated (Adj-P<0.01)
ENSG00000114115.9_RBP1	RBP1	0.556517	0.855575	5.39336	2.25e-07	2.76e-05	Significantly upregulated (Adj-P<0.01)
ENSG00000162367.11_TAL1	TAL1	0.521709	1.08215	5.3901	2.28e-07	2.76e-05	Significantly upregulated (Adj-P<0.01)
ENSG00000150401.14_DCUN1D2	DCUN1D2	-0.221917	6.36301	-5.42676	1.92e-07	2.43e-05	Significantly downregulated (Adj-P<0.01)
ENSG00000137073.21_UBAP2	UBAP2	-0.258292	5.59087	-5.41804	2e-07	2.51e-05	Significantly downregulated (Adj-P<0.01)
ENSG00000170348.8_TMED10	TMED10	-0.213675	6.63151	-5.41159	2.06e-07	2.57e-05	Significantly downregulated (Adj-P<0.01)
ENSG00000157227.12_MMP14	MMP14	0.598307	2.89884	5.39019	2.28e-07	2.76e-05	Significantly upregulated (Adj-P<0.01)
ENSG00000141756.18_FKBP10	FKBP10	0.515183	2.31918	5.36888	2.52e-07	2.94e-05	Significantly upregulated (Adj-P<0.01)
ENSG00000170515.13_PA2G4	PA2G4	-0.183388	5.91762	-5.39821	2.2e-07	2.71e-05	Significantly downregulated (Adj-P<0.01)
ENSG00000232931.5_LINC00342	LINC00342	0.450324	1.59491	5.34439	2.84e-07	3.23e-05	Significantly upregulated (Adj-P<0.01)
ENSG00000282556.2_AC068733.3		0.753807	-0.32722	5.36854	2.53e-07	2.94e-05	Significantly upregulated (Adj-P<0.01)
ENSG00000178860.8_MSC	MSC	0.703945	0.617898	5.34285	2.86e-07	3.23e-05	Significantly upregulated (Adj-P<0.01)
ENSG00000162194.12_LBHD1	LBHD1	0.557136	-0.485457	5.37187	2.49e-07	2.94e-05	Significantly upregulated (Adj-P<0.01)
ENSG00000132793.11_LPIN3	LPIN3	0.416084	1.55583	5.33809	2.92e-07	3.28e-05	Significantly upregulated (Adj-P<0.01)
ENSG00000156298.12_TSPAN7	TSPAN7	-0.210831	6.63136	-5.37756	2.42e-07	2.9e-05	Significantly downregulated (Adj-P<0.01)
ENSG00000147224.11_PRPS1	PRPS1	-0.165313	4.73464	-5.37462	2.46e-07	2.92e-05	Significantly downregulated (Adj-P<0.01)
ENSG00000166341.7_DCHS1	DCHS1	0.459945	3.70312	5.3531	2.72e-07	3.14e-05	Significantly upregulated (Adj-P<0.01)
ENSG00000135108.14_FBXO21	FBXO21	-0.32264	5.33689	-5.34774	2.79e-07	3.2e-05	Significantly downregulated (Adj-P<0.01)
ENSG00000005513.9_SOX8	SOX8	0.823113	0.158202	5.29446	3.59e-07	3.8e-05	Significantly upregulated (Adj-P<0.01)
ENSG00000132383.11_RPA1	RPA1	-0.191932	6.13064	-5.33266	3e-07	3.34e-05	Significantly downregulated (Adj-P<0.01)
ENSG00000205531.12_NAP1L4	NAP1L4	-0.141746	6.77377	-5.32574	3.1e-07	3.42e-05	Significantly downregulated (Adj-P<0.01)
ENSG00000167680.15_SEMA6B	SEMA6B	0.476671	2.35464	5.29335	3.61e-07	3.8e-05	Significantly upregulated (Adj-P<0.01)
ENSG00000183431.11_SF3A3	SF3A3	0.534986	5.38355	5.31872	3.2e-07	3.51e-05	Significantly upregulated (Adj-P<0.01)
ENSG00000138279.15_ANXA7	ANXA7	-0.154063	6.66394	-5.31283	3.29e-07	3.59e-05	Significantly downregulated (Adj-P<0.01)
ENSG00000143761.15_ARF1	ARF1	-0.127717	6.95303	-5.308	3.37e-07	3.62e-05	Significantly downregulated (Adj-P<0.01)
ENSG00000132471.11_WBP2	WBP2	-0.245014	6.07135	-5.30945	3.34e-07	3.62e-05	Significantly downregulated (Adj-P<0.01)
ENSG00000119321.8_FKBP15	FKBP15	-0.157302	4.28028	-5.29722	3.54e-07	3.78e-05	Significantly downregulated (Adj-P<0.01)
ENSG00000112655.15_PTK7	PTK7	0.830787	-0.869216	5.28848	3.69e-07	3.86e-05	Significantly upregulated (Adj-P<0.01)
ENSG00000135829.16_DHX9	DHX9	-0.174637	5.42215	-5.28712	3.72e-07	3.86e-05	Significantly downregulated (Adj-P<0.01)
ENSG00000160753.15_RUSC1	RUSC1	0.244906	3.03128	5.25113	4.4e-07	4.48e-05	Significantly upregulated (Adj-P<0.01)
ENSG00000143742.12_SRP9	SRP9	-0.164024	7.0187	-5.26	4.22e-07	4.36e-05	Significantly downregulated (Adj-P<0.01)
ENSG00000164398.12_ACSL6	ACSL6	-0.525619	2.99251	-5.23683	4.7e-07	4.73e-05	Significantly downregulated (Adj-P<0.01)
ENSG00000114988.11_LMAN2L	LMAN2L	-0.230524	3.75973	-5.25156	4.39e-07	4.48e-05	Significantly downregulated (Adj-P<0.01)
ENSG00000178467.17_P4HTM	P4HTM	0.314709	3.31578	5.24289	4.57e-07	4.63e-05	Significantly upregulated (Adj-P<0.01)
ENSG00000106484.15_MEST	MEST	0.817627	1.56904	5.20286	5.51e-07	5.44e-05	Significantly upregulated (Adj-P<0.01)
ENSG00000170004.16_CHD3	CHD3	0.411811	3.69653	5.23346	4.78e-07	4.78e-05	Significantly upregulated (Adj-P<0.01)
ENSG00000176641.10_RNF152	RNF152	0.539665	1.23783	5.18809	5.9e-07	5.65e-05	Significantly upregulated (Adj-P<0.01)
ENSG00000105732.12_ZNF574	ZNF574	-0.234693	3.10317	-5.20036	5.57e-07	5.45e-05	Significantly downregulated (Adj-P<0.01)
ENSG00000214548.16_MEG3	MEG3	0.399759	6.74818	5.19996	5.58e-07	5.45e-05	Significantly upregulated (Adj-P<0.01)
ENSG00000003056.7_M6PR	M6PR	-0.131952	4.90173	-5.20448	5.47e-07	5.43e-05	Significantly downregulated (Adj-P<0.01)
ENSG00000082512.14_TRAF5	TRAF5	0.481147	1.64134	5.15104	7.01e-07	6.55e-05	Significantly upregulated (Adj-P<0.01)
ENSG00000126767.17_ELK1	ELK1	0.252794	3.83679	5.19244	5.78e-07	5.6e-05	Significantly upregulated (Adj-P<0.01)
ENSG00000089101.17_CFAP61	CFAP61	-0.789024	3.5151	-5.17017	6.41e-07	6.1e-05	Significantly downregulated (Adj-P<0.01)
ENSG00000163909.7_HEYL	HEYL	0.455131	2.06983	5.14866	7.08e-07	6.57e-05	Significantly upregulated (Adj-P<0.01)
ENSG00000148672.8_GLUD1	GLUD1	0.188875	5.46544	5.18889	5.88e-07	5.65e-05	Significantly upregulated (Adj-P<0.01)
ENSG00000285589.1_AC010422.8		0.33233	1.8409	5.13677	7.48e-07	6.79e-05	Significantly upregulated (Adj-P<0.01)
ENSG00000128641.18_MYO1B	MYO1B	0.41658	3.44071	5.16426	6.59e-07	6.2e-05	Significantly upregulated (Adj-P<0.01)
ENSG00000149257.14_SERPINH1	SERPINH1	0.454395	3.68516	5.1671	6.51e-07	6.15e-05	Significantly upregulated (Adj-P<0.01)
ENSG00000177943.13_MAMDC4	MAMDC4	0.449281	2.46669	5.14409	7.24e-07	6.64e-05	Significantly upregulated (Adj-P<0.01)
ENSG00000162882.14_HAAO	HAAO	0.612173	-0.122301	5.13234	7.64e-07	6.89e-05	Significantly upregulated (Adj-P<0.01)
ENSG00000167992.12_VWCE	VWCE	0.5611	-0.166028	5.12638	7.85e-07	6.96e-05	Significantly upregulated (Adj-P<0.01)
ENSG00000103044.10_HAS3	HAS3	0.490647	0.427618	5.11142	8.41e-07	7.33e-05	Significantly upregulated (Adj-P<0.01)
ENSG00000169129.14_AFAP1L2	AFAP1L2	0.473726	1.46134	5.10659	8.6e-07	7.44e-05	Significantly upregulated (Adj-P<0.01)
ENSG00000229659.1_RPL26P6	RPL26P6	0.51251	1.52723	5.1048	8.67e-07	7.44e-05	Significantly upregulated (Adj-P<0.01)
ENSG00000150967.17_ABCB9	ABCB9	0.629489	-0.41635	5.12168	8.02e-07	7.08e-05	Significantly upregulated (Adj-P<0.01)
ENSG00000138768.14_USO1	USO1	-0.285127	8.29267	-5.13672	7.49e-07	6.79e-05	Significantly downregulated (Adj-P<0.01)
ENSG00000277449.1_CEBPB-AS1	CEBPB-AS1	0.318788	2.40063	5.11222	8.38e-07	7.33e-05	Significantly upregulated (Adj-P<0.01)
ENSG00000142973.13_CYP4B1	CYP4B1	-0.808393	1.92676	-5.09851	8.92e-07	7.61e-05	Significantly downregulated (Adj-P<0.01)
ENSG00000112081.16_SRSF3	SRSF3	-0.190225	5.73565	-5.14779	7.11e-07	6.57e-05	Significantly downregulated (Adj-P<0.01)
ENSG00000260807.6_AC009041.2		0.782623	0.401077	5.07617	9.89e-07	8.21e-05	Significantly upregulated (Adj-P<0.01)
ENSG00000110958.15_PTGES3	PTGES3	-0.217534	6.79687	-5.12875	7.77e-07	6.96e-05	Significantly downregulated (Adj-P<0.01)
ENSG00000162736.16_NCSTN	NCSTN	-0.167269	4.96088	-5.12761	7.81e-07	6.96e-05	Significantly downregulated (Adj-P<0.01)
ENSG00000116396.14_KCNC4	KCNC4	0.493907	2.94252	5.09501	9.07e-07	7.7e-05	Significantly upregulated (Adj-P<0.01)
ENSG00000110076.18_NRXN2	NRXN2	0.532928	0.479393	5.0483	1.12e-06	9.18e-05	Significantly upregulated (Adj-P<0.01)
ENSG00000112562.18_SMOC2	SMOC2	0.49531	5.38149	5.1057	8.63e-07	7.44e-05	Significantly upregulated (Adj-P<0.01)
ENSG00000142798.19_HSPG2	HSPG2	0.434796	7.43197	5.08946	9.3e-07	7.85e-05	Significantly upregulated (Adj-P<0.01)
ENSG00000122566.21_HNRNPA2B1	HNRNPA2B1	-0.145203	9.05323	-5.07814	9.8e-07	8.21e-05	Significantly downregulated (Adj-P<0.01)
ENSG00000188157.14_AGRN	AGRN	0.50847	3.51625	5.07698	9.85e-07	8.21e-05	Significantly upregulated (Adj-P<0.01)
ENSG00000107551.20_RASSF4	RASSF4	0.324923	4.70004	5.05948	1.07e-06	8.82e-05	Significantly upregulated (Adj-P<0.01)
ENSG00000113248.5_PCDHB15	PCDHB15	0.613078	-0.238257	5.01231	1.32e-06	0.000100782	Significantly upregulated (Adj-P<0.01)
ENSG00000162267.12_ITIH3	ITIH3	0.946104	0.246977	4.99647	1.42e-06	0.000106729	Significantly upregulated (Adj-P<0.01)
ENSG00000177732.8_SOX12	SOX12	0.652449	1.04478	4.99283	1.44e-06	0.000107471	Significantly upregulated (Adj-P<0.01)
ENSG00000089472.16_HEPH	HEPH	0.665629	-0.472681	5.01474	1.31e-06	0.000100161	Significantly upregulated (Adj-P<0.01)
ENSG00000162576.16_MXRA8	MXRA8	0.400413	4.34543	5.04174	1.16e-06	9.31e-05	Significantly upregulated (Adj-P<0.01)
ENSG00000177971.8_IMP3	IMP3	-0.21226	4.55781	-5.03997	1.17e-06	9.31e-05	Significantly downregulated (Adj-P<0.01)
ENSG00000159023.21_EPB41	EPB41	-0.207421	4.8906	-5.04122	1.16e-06	9.31e-05	Significantly downregulated (Adj-P<0.01)
ENSG00000189171.14_S100A13	S100A13	0.569614	4.46083	5.0356	1.19e-06	9.43e-05	Significantly upregulated (Adj-P<0.01)
ENSG00000166197.16_NOLC1	NOLC1	-0.176875	5.37004	-5.03966	1.17e-06	9.31e-05	Significantly downregulated (Adj-P<0.01)
ENSG00000106723.16_SPIN1	SPIN1	0.400853	2.75362	5.00258	1.38e-06	0.000104817	Significantly upregulated (Adj-P<0.01)
ENSG00000075785.12_RAB7A	RAB7A	-0.122793	7.50756	-5.02412	1.25e-06	9.69e-05	Significantly downregulated (Adj-P<0.01)
ENSG00000123178.14_SPRYD7	SPRYD7	-0.205693	4.48625	-5.02831	1.23e-06	9.63e-05	Significantly downregulated (Adj-P<0.01)
ENSG00000211460.11_TSN	TSN	-0.156737	5.61552	-5.03136	1.21e-06	9.57e-05	Significantly downregulated (Adj-P<0.01)
ENSG00000102119.10_EMD	EMD	-0.201334	5.21527	-5.02784	1.23e-06	9.63e-05	Significantly downregulated (Adj-P<0.01)
ENSG00000198815.8_FOXJ3	FOXJ3	-0.207857	6.03019	-5.0264	1.24e-06	9.64e-05	Significantly downregulated (Adj-P<0.01)
ENSG00000230454.1_U73166.1		0.498586	-0.343669	4.97903	1.54e-06	0.000112263	Significantly upregulated (Adj-P<0.01)
ENSG00000121671.11_CRY2	CRY2	-0.218293	7.03884	-5.01721	1.29e-06	9.95e-05	Significantly downregulated (Adj-P<0.01)
ENSG00000135596.17_MICAL1	MICAL1	0.385851	2.74153	4.98692	1.48e-06	0.000109349	Significantly upregulated (Adj-P<0.01)
ENSG00000065308.4_TRAM2	TRAM2	0.335555	2.39392	4.97373	1.57e-06	0.000114445	Significantly upregulated (Adj-P<0.01)
ENSG00000171606.17_ZNF274	ZNF274	-0.320536	3.53026	-4.98945	1.47e-06	0.000108615	Significantly downregulated (Adj-P<0.01)
ENSG00000087116.15_ADAMTS2	ADAMTS2	0.848654	1.04615	4.9452	1.79e-06	0.000125881	Significantly upregulated (Adj-P<0.01)
ENSG00000143363.16_PRUNE1	PRUNE1	-0.177774	4.68852	-5.00062	1.39e-06	0.000105245	Significantly downregulated (Adj-P<0.01)
ENSG00000183160.8_TMEM119	TMEM119	0.900065	-0.144538	4.94527	1.79e-06	0.000125881	Significantly upregulated (Adj-P<0.01)
ENSG00000232237.3_ASCL5	ASCL5	1.18849	-1.72349	5.04247	1.15e-06	9.31e-05	Significantly upregulated (Adj-P<0.01)
ENSG00000135447.16_PPP1R1A	PPP1R1A	-0.319285	8.37733	-4.97921	1.54e-06	0.000112263	Significantly downregulated (Adj-P<0.01)
ENSG00000185418.15_TARSL2	TARSL2	-0.224276	5.80687	-4.99445	1.43e-06	0.000107197	Significantly downregulated (Adj-P<0.01)
ENSG00000124766.6_SOX4	SOX4	0.566786	2.23978	4.94452	1.8e-06	0.000125881	Significantly upregulated (Adj-P<0.01)
ENSG00000196123.12_KIAA0895L	KIAA0895L	0.335161	2.76405	4.95827	1.69e-06	0.000120482	Significantly upregulated (Adj-P<0.01)
ENSG00000083857.13_FAT1	FAT1	0.549801	2.00162	4.93597	1.87e-06	0.000129656	Significantly upregulated (Adj-P<0.01)
ENSG00000185432.11_METTL7A	METTL7A	-0.494426	6.24569	-4.97272	1.58e-06	0.000114445	Significantly downregulated (Adj-P<0.01)
ENSG00000186827.10_TNFRSF4	TNFRSF4	0.773597	-0.332292	4.91839	2.02e-06	0.000137847	Significantly upregulated (Adj-P<0.01)
ENSG00000087274.16_ADD1	ADD1	-0.135713	7.37603	-4.96165	1.66e-06	0.000119749	Significantly downregulated (Adj-P<0.01)
ENSG00000197558.11_SSPO	SSPO	0.696311	-0.436049	4.91342	2.07e-06	0.000138123	Significantly upregulated (Adj-P<0.01)
ENSG00000138092.10_CENPO	CENPO	0.273356	1.81519	4.91207	2.08e-06	0.000138123	Significantly upregulated (Adj-P<0.01)
ENSG00000166813.14_KIF7	KIF7	0.516859	0.0889177	4.8981	2.21e-06	0.000142673	Significantly upregulated (Adj-P<0.01)
ENSG00000143416.20_SELENBP1	SELENBP1	-0.353767	5.42797	-4.9595	1.68e-06	0.000120364	Significantly downregulated (Adj-P<0.01)
ENSG00000142453.11_CARM1	CARM1	-0.213552	6.72044	-4.94773	1.77e-06	0.00012576	Significantly downregulated (Adj-P<0.01)
ENSG00000049540.16_ELN	ELN	0.894134	2.86193	4.92177	1.99e-06	0.000136372	Significantly upregulated (Adj-P<0.01)
ENSG00000149499.11_EML3	EML3	0.33353	2.84799	4.91514	2.05e-06	0.000138123	Significantly upregulated (Adj-P<0.01)
ENSG00000039123.15_MTREX	MTREX	-0.202922	5.54748	-4.94122	1.82e-06	0.000127197	Significantly downregulated (Adj-P<0.01)
ENSG00000176435.6_CLEC14A	CLEC14A	0.335579	4.12131	4.93133	1.91e-06	0.000131797	Significantly upregulated (Adj-P<0.01)
ENSG00000182712.15_CMC4	CMC4	0.327064	3.08297	4.91257	2.07e-06	0.000138123	Significantly upregulated (Adj-P<0.01)
ENSG00000179010.14_MRFAP1	MRFAP1	-0.149825	7.54417	-4.9266	1.95e-06	0.000134037	Significantly downregulated (Adj-P<0.01)
ENSG00000167182.14_SP2	SP2	-0.195308	3.90365	-4.91583	2.04e-06	0.000138123	Significantly downregulated (Adj-P<0.01)
ENSG00000006047.12_YBX2	YBX2	0.531161	0.768637	4.86197	2.6e-06	0.000161186	Significantly upregulated (Adj-P<0.01)
ENSG00000131747.14_TOP2A	TOP2A	1.52519	-2.17028	5.04889	1.12e-06	9.18e-05	Significantly upregulated (Adj-P<0.01)
ENSG00000096093.15_EFHC1	EFHC1	0.336267	1.61863	4.863	2.59e-06	0.000161082	Significantly upregulated (Adj-P<0.01)
ENSG00000130956.13_HABP4	HABP4	0.26392	3.36671	4.90077	2.19e-06	0.000142347	Significantly upregulated (Adj-P<0.01)
ENSG00000157119.11_KLHL40	KLHL40	-0.461062	7.57012	-4.9101	2.1e-06	0.00013825	Significantly downregulated (Adj-P<0.01)
ENSG00000149781.12_FERMT3	FERMT3	0.554586	0.88044	4.85277	2.71e-06	0.000165193	Significantly upregulated (Adj-P<0.01)
ENSG00000117450.13_PRDX1	PRDX1	-0.205727	6.7074	-4.91173	2.08e-06	0.000138123	Significantly downregulated (Adj-P<0.01)
ENSG00000145907.14_G3BP1	G3BP1	-0.223856	6.67713	-4.91125	2.09e-06	0.000138123	Significantly downregulated (Adj-P<0.01)
ENSG00000167552.13_TUBA1A	TUBA1A	0.471984	4.14007	4.90298	2.16e-06	0.000142124	Significantly upregulated (Adj-P<0.01)
ENSG00000261971.7_MMP25-AS1	MMP25-AS1	0.510902	1.46899	4.84684	2.78e-06	0.000167094	Significantly upregulated (Adj-P<0.01)
ENSG00000171885.14_AQP4	AQP4	-0.582958	6.57622	-4.90199	2.17e-06	0.000142164	Significantly downregulated (Adj-P<0.01)
ENSG00000082196.20_C1QTNF3	C1QTNF3	0.538424	1.5345	4.84506	2.8e-06	0.000167139	Significantly upregulated (Adj-P<0.01)
ENSG00000205791.3_LOH12CR2	LOH12CR2	0.61328	-1.08274	4.89237	2.27e-06	0.000145376	Significantly upregulated (Adj-P<0.01)
ENSG00000092203.13_TOX4	TOX4	-0.149423	5.96282	-4.89971	2.2e-06	0.00014243	Significantly downregulated (Adj-P<0.01)
ENSG00000116209.11_TMEM59	TMEM59	-0.132082	6.3142	-4.89749	2.22e-06	0.000142673	Significantly downregulated (Adj-P<0.01)
ENSG00000006118.14_TMEM132A	TMEM132A	0.391586	1.63904	4.84388	2.82e-06	0.000167382	Significantly upregulated (Adj-P<0.01)
ENSG00000131931.8_THAP1	THAP1	-0.25161	2.81733	-4.86085	2.61e-06	0.000161352	Significantly downregulated (Adj-P<0.01)
ENSG00000100227.17_POLDIP3	POLDIP3	-0.183209	5.00353	-4.88919	2.3e-06	0.000146854	Significantly downregulated (Adj-P<0.01)
ENSG00000008853.16_RHOBTB2	RHOBTB2	0.260259	4.44775	4.88461	2.35e-06	0.000149277	Significantly upregulated (Adj-P<0.01)
ENSG00000163482.11_STK36	STK36	0.219265	2.63763	4.8516	2.72e-06	0.000165193	Significantly upregulated (Adj-P<0.01)
ENSG00000005893.15_LAMP2	LAMP2	-0.272212	7.10722	-4.88008	2.4e-06	0.000151703	Significantly downregulated (Adj-P<0.01)
ENSG00000127920.5_GNG11	GNG11	0.350916	3.8959	4.87459	2.46e-06	0.000154213	Significantly upregulated (Adj-P<0.01)
ENSG00000161547.16_SRSF2	SRSF2	-0.16591	6.45864	-4.87854	2.41e-06	0.000152138	Significantly downregulated (Adj-P<0.01)
ENSG00000131398.13_KCNC3	KCNC3	0.606518	-0.637991	4.82707	3.03e-06	0.000177617	Significantly upregulated (Adj-P<0.01)
ENSG00000198168.8_SVIP	SVIP	-0.289733	3.31591	-4.85276	2.71e-06	0.000165193	Significantly downregulated (Adj-P<0.01)
ENSG00000273611.4_ZNHIT3	ZNHIT3	-0.167429	4.09949	-4.86839	2.52e-06	0.0001579	Significantly downregulated (Adj-P<0.01)
ENSG00000171680.21_PLEKHG5	PLEKHG5	0.459139	2.80698	4.84557	2.79e-06	0.000167139	Significantly upregulated (Adj-P<0.01)
ENSG00000198783.5_ZNF830	ZNF830	-0.216378	2.75813	-4.83779	2.89e-06	0.000171308	Significantly downregulated (Adj-P<0.01)
ENSG00000171502.14_COL24A1	COL24A1	0.768272	0.953789	4.79244	3.53e-06	0.000197358	Significantly upregulated (Adj-P<0.01)
ENSG00000149256.15_TENM4	TENM4	0.662094	0.691234	4.78991	3.57e-06	0.000198855	Significantly upregulated (Adj-P<0.01)
ENSG00000243989.8_ACY1	ACY1	0.312064	3.73567	4.84692	2.78e-06	0.000167094	Significantly upregulated (Adj-P<0.01)
ENSG00000117385.15_P3H1	P3H1	0.295005	2.33831	4.81334	3.22e-06	0.000185272	Significantly upregulated (Adj-P<0.01)
ENSG00000015676.17_NUDCD3	NUDCD3	-0.165247	6.60285	-4.85116	2.73e-06	0.000165193	Significantly downregulated (Adj-P<0.01)
ENSG00000102316.16_MAGED2	MAGED2	0.302862	5.74341	4.85403	2.69e-06	0.000165193	Significantly upregulated (Adj-P<0.01)
ENSG00000121039.9_RDH10	RDH10	-0.252027	2.54127	-4.81058	3.26e-06	0.000186435	Significantly downregulated (Adj-P<0.01)
ENSG00000165714.10_BORCS5	BORCS5	-0.21073	2.30073	-4.79753	3.45e-06	0.000193672	Significantly downregulated (Adj-P<0.01)
ENSG00000136144.11_RCBTB1	RCBTB1	0.330308	2.92122	4.8145	3.21e-06	0.000185002	Significantly upregulated (Adj-P<0.01)
ENSG00000204099.11_NEU4	NEU4	1.17141	-0.803547	4.78693	3.62e-06	0.000200772	Significantly upregulated (Adj-P<0.01)
ENSG00000092820.17_EZR	EZR	0.351784	3.78357	4.82906	3.01e-06	0.000177387	Significantly upregulated (Adj-P<0.01)
ENSG00000165633.12_VSTM4	VSTM4	0.350502	2.61744	4.80069	3.41e-06	0.000191681	Significantly upregulated (Adj-P<0.01)
ENSG00000111049.3_MYF5	MYF5	0.409872	1.45843	4.77587	3.8e-06	0.000208552	Significantly upregulated (Adj-P<0.01)
ENSG00000152430.17_BOLL	BOLL	-0.381397	1.92226	-4.77388	3.83e-06	0.000208922	Significantly downregulated (Adj-P<0.01)
ENSG00000115806.12_GORASP2	GORASP2	-0.113623	5.04118	-4.82751	3.03e-06	0.000177617	Significantly downregulated (Adj-P<0.01)
ENSG00000206549.13_PRSS50	PRSS50	-0.78274	1.88132	-4.76485	3.99e-06	0.000215855	Significantly downregulated (Adj-P<0.01)
ENSG00000282851.2_BISPR	BISPR	0.699669	-1.13328	4.80243	3.38e-06	0.000190902	Significantly upregulated (Adj-P<0.01)
ENSG00000272168.6_CASC15	CASC15	0.626046	-0.215753	4.75848	4.1e-06	0.000220034	Significantly upregulated (Adj-P<0.01)
ENSG00000165548.10_TMEM63C	TMEM63C	1.06828	-0.494315	4.75432	4.18e-06	0.000222213	Significantly upregulated (Adj-P<0.01)
ENSG00000188021.8_UBQLN2	UBQLN2	-0.164532	5.2223	-4.82081	3.12e-06	0.000181924	Significantly downregulated (Adj-P<0.01)
ENSG00000121774.17_KHDRBS1	KHDRBS1	-0.147175	5.35832	-4.8174	3.16e-06	0.000183997	Significantly downregulated (Adj-P<0.01)
ENSG00000185963.13_BICD2	BICD2	-0.199917	4.89966	-4.8162	3.18e-06	0.000184295	Significantly downregulated (Adj-P<0.01)
ENSG00000226137.5_BAIAP2-DT	BAIAP2-DT	0.461523	0.482169	4.74326	4.38e-06	0.000231647	Significantly upregulated (Adj-P<0.01)
ENSG00000057757.9_PITHD1	PITHD1	-0.168146	5.04544	-4.81026	3.27e-06	0.000186435	Significantly downregulated (Adj-P<0.01)
ENSG00000103275.19_UBE2I	UBE2I	-0.179899	5.2142	-4.8082	3.3e-06	0.000187461	Significantly downregulated (Adj-P<0.01)
ENSG00000175040.5_CHST2	CHST2	0.493293	0.515734	4.73544	4.54e-06	0.000235392	Significantly upregulated (Adj-P<0.01)
ENSG00000136146.14_MED4	MED4	-0.140264	4.61086	-4.803	3.37e-06	0.000190902	Significantly downregulated (Adj-P<0.01)
ENSG00000171159.4_C9orf16	C9orf16	0.404706	2.73972	4.77252	3.86e-06	0.000209442	Significantly upregulated (Adj-P<0.01)
ENSG00000116337.15_AMPD2	AMPD2	0.50272	1.35482	4.73591	4.53e-06	0.000235392	Significantly upregulated (Adj-P<0.01)
ENSG00000255690.2_TRIL	TRIL	0.518634	2.05535	4.74501	4.35e-06	0.000230662	Significantly upregulated (Adj-P<0.01)
ENSG00000111275.12_ALDH2	ALDH2	-0.300492	7.6159	-4.77796	3.77e-06	0.000207374	Significantly downregulated (Adj-P<0.01)
ENSG00000105419.17_MEIS3	MEIS3	0.621709	-0.716789	4.7375	4.49e-06	0.000235171	Significantly upregulated (Adj-P<0.01)
ENSG00000148677.6_ANKRD1	ANKRD1	1.3599	4.63689	4.78143	3.71e-06	0.000204953	Significantly upregulated (Adj-P<0.01)
ENSG00000185222.9_TCEAL9	TCEAL9	0.360595	1.71958	4.72346	4.78e-06	0.000243568	Significantly upregulated (Adj-P<0.01)
ENSG00000119699.7_TGFB3	TGFB3	0.46802	3.14976	4.75735	4.12e-06	0.000220034	Significantly upregulated (Adj-P<0.01)
ENSG00000173692.12_PSMD1	PSMD1	-0.177392	6.71681	-4.77475	3.82e-06	0.000208846	Significantly downregulated (Adj-P<0.01)
ENSG00000183853.17_KIRREL1	KIRREL1	0.409685	2.56984	4.73501	4.54e-06	0.000235392	Significantly upregulated (Adj-P<0.01)
ENSG00000170921.15_TANC2	TANC2	0.366482	2.22466	4.72506	4.75e-06	0.00024342	Significantly upregulated (Adj-P<0.01)
ENSG00000154133.14_ROBO4	ROBO4	0.352101	3.99586	4.7639	4e-06	0.000216016	Significantly upregulated (Adj-P<0.01)
ENSG00000172005.10_MAL	MAL	0.646749	-0.970978	4.72554	4.74e-06	0.00024342	Significantly upregulated (Adj-P<0.01)
ENSG00000227456.7_LINC00310	LINC00310	-0.726877	1.13028	-4.69488	5.41e-06	0.000270461	Significantly downregulated (Adj-P<0.01)
ENSG00000183580.9_FBXL7	FBXL7	0.40752	1.31302	4.69649	5.37e-06	0.000269438	Significantly upregulated (Adj-P<0.01)
ENSG00000196562.14_SULF2	SULF2	0.390292	2.94377	4.72825	4.68e-06	0.000241632	Significantly upregulated (Adj-P<0.01)
ENSG00000155876.5_RRAGA	RRAGA	-0.143785	5.67283	-4.75736	4.12e-06	0.000220034	Significantly downregulated (Adj-P<0.01)
ENSG00000152700.13_SAR1B	SAR1B	-0.249089	7.5691	-4.74215	4.4e-06	0.000231993	Significantly downregulated (Adj-P<0.01)
ENSG00000184497.12_TMEM255B	TMEM255B	0.479552	0.558763	4.674	5.92e-06	0.000284295	Significantly upregulated (Adj-P<0.01)
ENSG00000269604.1_AC005523.2		-0.204808	9.06423	-4.72342	4.78e-06	0.000243568	Significantly downregulated (Adj-P<0.01)
ENSG00000064692.18_SNCAIP	SNCAIP	0.787442	-1.14957	4.71395	4.98e-06	0.000252185	Significantly upregulated (Adj-P<0.01)
ENSG00000168872.16_DDX19A	DDX19A	-0.1219	5.53337	-4.73955	4.45e-06	0.000233862	Significantly downregulated (Adj-P<0.01)
ENSG00000110042.7_DTX4	DTX4	0.422918	1.41877	4.66952	6.04e-06	0.00028721	Significantly upregulated (Adj-P<0.01)
ENSG00000258584.2_FAM181A-AS1	FAM181A-AS1	0.646531	-0.0208616	4.66005	6.29e-06	0.000293862	Significantly upregulated (Adj-P<0.01)
ENSG00000050165.17_DKK3	DKK3	0.420818	2.19441	4.68228	5.71e-06	0.000276828	Significantly upregulated (Adj-P<0.01)
ENSG00000136783.9_NIPSNAP3A	NIPSNAP3A	0.378728	2.83836	4.69686	5.36e-06	0.000269438	Significantly upregulated (Adj-P<0.01)
ENSG00000179403.11_VWA1	VWA1	0.445656	2.67172	4.69227	5.47e-06	0.000270955	Significantly upregulated (Adj-P<0.01)
ENSG00000100379.17_KCTD17	KCTD17	0.628927	-0.443668	4.66065	6.27e-06	0.000293862	Significantly upregulated (Adj-P<0.01)
ENSG00000153310.19_FAM49B	FAM49B	-0.198664	4.75401	-4.72142	4.82e-06	0.0002449	Significantly downregulated (Adj-P<0.01)
ENSG00000143387.12_CTSK	CTSK	0.532555	1.96978	4.66626	6.12e-06	0.000288666	Significantly upregulated (Adj-P<0.01)
ENSG00000177302.14_TOP3A	TOP3A	0.191818	3.11064	4.69296	5.46e-06	0.000270955	Significantly upregulated (Adj-P<0.01)
ENSG00000169252.5_ADRB2	ADRB2	-0.319774	2.85477	-4.68259	5.71e-06	0.000276828	Significantly downregulated (Adj-P<0.01)
ENSG00000196411.9_EPHB4	EPHB4	0.368987	2.89421	4.68435	5.66e-06	0.000276063	Significantly upregulated (Adj-P<0.01)
ENSG00000170382.11_LRRN2	LRRN2	0.398168	0.891354	4.63545	6.99e-06	0.000317257	Significantly upregulated (Adj-P<0.01)
ENSG00000198483.12_ANKRD35	ANKRD35	-0.328099	2.93375	-4.67526	5.89e-06	0.000283614	Significantly downregulated (Adj-P<0.01)
ENSG00000160323.18_ADAMTS13	ADAMTS13	0.318315	2.58476	4.66719	6.1e-06	0.000288368	Significantly upregulated (Adj-P<0.01)
ENSG00000109063.14_MYH3	MYH3	1.0998	3.80112	4.69364	5.44e-06	0.000270955	Significantly upregulated (Adj-P<0.01)
ENSG00000139625.12_MAP3K12	MAP3K12	0.331579	1.70172	4.64155	6.81e-06	0.000312651	Significantly upregulated (Adj-P<0.01)
ENSG00000163125.15_RPRD2	RPRD2	-0.20373	5.46427	-4.69697	5.36e-06	0.000269438	Significantly downregulated (Adj-P<0.01)
ENSG00000018189.12_RUFY3	RUFY3	0.214494	4.27944	4.6894	5.54e-06	0.000273487	Significantly upregulated (Adj-P<0.01)
ENSG00000163995.19_ABLIM2	ABLIM2	-0.286476	6.77141	-4.68629	5.62e-06	0.000276063	Significantly downregulated (Adj-P<0.01)
ENSG00000153721.18_CNKSR3	CNKSR3	0.373261	1.02262	4.61521	7.63e-06	0.000338285	Significantly upregulated (Adj-P<0.01)
ENSG00000108878.4_CACNG1	CACNG1	-0.258926	6.6098	-4.68454	5.66e-06	0.000276063	Significantly downregulated (Adj-P<0.01)
ENSG00000196199.13_MPHOSPH8	MPHOSPH8	-0.154105	4.83746	-4.68469	5.65e-06	0.000276063	Significantly downregulated (Adj-P<0.01)
ENSG00000076641.4_PAG1	PAG1	0.439078	1.53067	4.61533	7.62e-06	0.000338285	Significantly upregulated (Adj-P<0.01)
ENSG00000103035.10_PSMD7	PSMD7	-0.13623	6.6584	-4.67735	5.84e-06	0.000281925	Significantly downregulated (Adj-P<0.01)
ENSG00000170144.20_HNRNPA3	HNRNPA3	-0.140994	6.84287	-4.67164	5.98e-06	0.000285452	Significantly downregulated (Adj-P<0.01)
ENSG00000089737.16_DDX24	DDX24	-0.154409	6.09245	-4.67207	5.97e-06	0.000285452	Significantly downregulated (Adj-P<0.01)
ENSG00000165810.16_BTNL9	BTNL9	0.477211	5.37052	4.6687	6.06e-06	0.000287356	Significantly upregulated (Adj-P<0.01)
ENSG00000125482.12_TTF1	TTF1	-0.192374	3.48225	-4.64626	6.68e-06	0.000308176	Significantly downregulated (Adj-P<0.01)
ENSG00000100991.11_TRPC4AP	TRPC4AP	-0.135956	5.6974	-4.66304	6.21e-06	0.000291831	Significantly downregulated (Adj-P<0.01)
ENSG00000187866.8_FAM122A	FAM122A	-0.148693	3.90208	-4.64819	6.62e-06	0.000307441	Significantly downregulated (Adj-P<0.01)
ENSG00000164099.3_PRSS12	PRSS12	0.976412	-1.62818	4.64472	6.72e-06	0.000309326	Significantly upregulated (Adj-P<0.01)
ENSG00000072736.18_NFATC3	NFATC3	-0.266967	5.34636	-4.64955	6.58e-06	0.000306544	Significantly downregulated (Adj-P<0.01)
ENSG00000137124.7_ALDH1B1	ALDH1B1	0.405697	5.50675	4.64669	6.66e-06	0.000308176	Significantly upregulated (Adj-P<0.01)
ENSG00000212978.6_AC016747.1		0.485142	-0.550443	4.5782	8.93e-06	0.00038214	Significantly upregulated (Adj-P<0.01)
ENSG00000163395.16_IGFN1	IGFN1	1.95348	6.26724	4.63738	6.94e-06	0.000316566	Significantly upregulated (Adj-P<0.01)
ENSG00000087303.17_NID2	NID2	0.50445	2.27111	4.59332	8.38e-06	0.000363602	Significantly upregulated (Adj-P<0.01)
ENSG00000154359.12_LONRF1	LONRF1	-0.292523	4.31281	-4.63695	6.95e-06	0.000316566	Significantly downregulated (Adj-P<0.01)
ENSG00000120693.13_SMAD9	SMAD9	0.657232	2.83518	4.6063	7.92e-06	0.000348424	Significantly upregulated (Adj-P<0.01)
ENSG00000064687.12_ABCA7	ABCA7	0.40808	3.84555	4.62956	7.17e-06	0.000324451	Significantly upregulated (Adj-P<0.01)
ENSG00000116717.12_GADD45A	GADD45A	0.697054	3.27523	4.6153	7.62e-06	0.000338285	Significantly upregulated (Adj-P<0.01)
ENSG00000132016.11_C19orf57	C19orf57	0.628093	-1.3086	4.5963	8.27e-06	0.000361618	Significantly upregulated (Adj-P<0.01)
ENSG00000070031.3_SCT	SCT	1.32027	-2.28483	4.63663	6.96e-06	0.000316566	Significantly upregulated (Adj-P<0.01)
ENSG00000117318.8_ID3	ID3	0.428916	3.10045	4.60844	7.85e-06	0.000346214	Significantly upregulated (Adj-P<0.01)
ENSG00000182580.2_EPHB3	EPHB3	0.898612	-1.65474	4.62846	7.21e-06	0.000325048	Significantly upregulated (Adj-P<0.01)
ENSG00000130309.10_COLGALT1	COLGALT1	0.23361	4.085	4.61793	7.54e-06	0.000338123	Significantly upregulated (Adj-P<0.01)
ENSG00000133055.8_MYBPH	MYBPH	1.68119	2.76274	4.5928	8.4e-06	0.000363602	Significantly upregulated (Adj-P<0.01)
ENSG00000197956.9_S100A6	S100A6	0.658312	4.7438	4.61809	7.53e-06	0.000338123	Significantly upregulated (Adj-P<0.01)
ENSG00000198113.2_TOR4A	TOR4A	0.351431	0.979895	4.54231	1.04e-05	0.000428911	Significantly upregulated (Adj-P<0.01)
ENSG00000171840.11_NINJ2	NINJ2	0.669005	1.91398	4.56169	9.58e-06	0.000404438	Significantly upregulated (Adj-P<0.01)
ENSG00000164619.9_BMPER	BMPER	-0.415027	1.07639	-4.53552	1.07e-05	0.0004373	Significantly downregulated (Adj-P<0.01)
ENSG00000206384.10_COL6A6	COL6A6	0.971903	-0.564654	4.54358	1.04e-05	0.000428695	Significantly upregulated (Adj-P<0.01)
ENSG00000100220.11_RTCB	RTCB	-0.129803	4.97976	-4.61246	7.72e-06	0.000341263	Significantly downregulated (Adj-P<0.01)
ENSG00000173812.10_EIF1	EIF1	-0.16652	9.17281	-4.58501	8.68e-06	0.000372226	Significantly downregulated (Adj-P<0.01)
ENSG00000087258.14_GNAO1	GNAO1	0.40715	1.15994	4.53541	1.07e-05	0.0004373	Significantly upregulated (Adj-P<0.01)
ENSG00000149179.13_C11orf49	C11orf49	0.276762	1.66706	4.54379	1.03e-05	0.000428695	Significantly upregulated (Adj-P<0.01)
ENSG00000165533.18_TTC8	TTC8	0.409626	0.364834	4.52004	1.14e-05	0.00046379	Significantly upregulated (Adj-P<0.01)
ENSG00000077009.13_NMRK2	NMRK2	0.995819	6.19808	4.59243	8.41e-06	0.000363602	Significantly upregulated (Adj-P<0.01)
ENSG00000083896.12_YTHDC1	YTHDC1	-0.180342	5.51415	-4.59727	8.24e-06	0.000361132	Significantly downregulated (Adj-P<0.01)
ENSG00000127863.15_TNFRSF19	TNFRSF19	0.581527	1.53382	4.52778	1.11e-05	0.000450031	Significantly upregulated (Adj-P<0.01)
ENSG00000167617.2_CDC42EP5	CDC42EP5	0.540885	-0.180719	4.51089	1.19e-05	0.000475892	Significantly upregulated (Adj-P<0.01)
ENSG00000138101.18_DTNB	DTNB	0.425148	0.717452	4.51221	1.18e-05	0.000475002	Significantly upregulated (Adj-P<0.01)
ENSG00000088387.18_DOCK9	DOCK9	0.341894	4.12005	4.58561	8.66e-06	0.000372226	Significantly upregulated (Adj-P<0.01)
ENSG00000189266.12_PNRC2	PNRC2	-0.214288	5.36101	-4.59251	8.41e-06	0.000363602	Significantly downregulated (Adj-P<0.01)
ENSG00000120733.13_KDM3B	KDM3B	-0.198286	6.18139	-4.58979	8.5e-06	0.00036671	Significantly downregulated (Adj-P<0.01)
ENSG00000172731.13_LRRC20	LRRC20	-0.196117	8.19752	-4.56945	9.27e-06	0.00039449	Significantly downregulated (Adj-P<0.01)
ENSG00000169242.11_EFNA1	EFNA1	0.415648	1.60149	4.51739	1.16e-05	0.000467795	Significantly upregulated (Adj-P<0.01)
ENSG00000176155.18_CCDC57	CCDC57	0.252849	3.08579	4.55221	9.98e-06	0.000418815	Significantly upregulated (Adj-P<0.01)
ENSG00000163803.12_PLB1	PLB1	-0.423808	0.726617	-4.49391	1.28e-05	0.000502613	Significantly downregulated (Adj-P<0.01)
ENSG00000159267.14_HLCS	HLCS	-0.183113	4.32781	-4.56998	9.25e-06	0.00039449	Significantly downregulated (Adj-P<0.01)
ENSG00000132718.8_SYT11	SYT11	0.368512	1.78273	4.50571	1.21e-05	0.000484019	Significantly upregulated (Adj-P<0.01)
ENSG00000181852.17_RNF41	RNF41	-0.21082	4.7151	-4.56762	9.35e-06	0.000396393	Significantly downregulated (Adj-P<0.01)
ENSG00000204301.6_NOTCH4	NOTCH4	0.367589	4.9212	4.56705	9.37e-06	0.000396393	Significantly upregulated (Adj-P<0.01)
ENSG00000105053.10_VRK3	VRK3	-0.158927	3.45803	-4.54387	1.03e-05	0.000428695	Significantly downregulated (Adj-P<0.01)
ENSG00000121005.8_CRISPLD1	CRISPLD1	1.06077	-1.85259	4.55456	9.88e-06	0.000415758	Significantly upregulated (Adj-P<0.01)
ENSG00000168453.14_HR	HR	0.724178	0.00662234	4.47256	1.4e-05	0.000535943	Significantly upregulated (Adj-P<0.01)
ENSG00000090061.17_CCNK	CCNK	-0.142112	4.2851	-4.54875	1.01e-05	0.000423867	Significantly downregulated (Adj-P<0.01)
ENSG00000118508.4_RAB32	RAB32	0.517759	0.224207	4.46704	1.43e-05	0.000545723	Significantly upregulated (Adj-P<0.01)
ENSG00000155066.15_PROM2	PROM2	0.465803	-0.142745	4.46825	1.42e-05	0.000544285	Significantly upregulated (Adj-P<0.01)
ENSG00000175309.14_PHYKPL	PHYKPL	0.194161	4.34374	4.54473	1.03e-05	0.000428695	Significantly upregulated (Adj-P<0.01)
ENSG00000118292.8_C1orf54	C1orf54	0.46596	0.497781	4.46069	1.47e-05	0.000556244	Significantly upregulated (Adj-P<0.01)
ENSG00000154174.7_TOMM70	TOMM70	-0.197227	6.57862	-4.54222	1.04e-05	0.000428911	Significantly downregulated (Adj-P<0.01)
ENSG00000104687.13_GSR	GSR	0.229525	4.12311	4.53787	1.06e-05	0.000435728	Significantly upregulated (Adj-P<0.01)
ENSG00000115226.9_FNDC4	FNDC4	0.760442	-0.572813	4.46213	1.46e-05	0.00055437	Significantly upregulated (Adj-P<0.01)
ENSG00000176720.5_BOK	BOK	0.618838	1.67951	4.4728	1.39e-05	0.000535943	Significantly upregulated (Adj-P<0.01)
ENSG00000242259.8_C22orf39	C22orf39	-0.175029	6.17669	-4.53517	1.07e-05	0.0004373	Significantly downregulated (Adj-P<0.01)
ENSG00000224940.8_PRRT4	PRRT4	0.734296	1.21021	4.45942	1.48e-05	0.000556624	Significantly upregulated (Adj-P<0.01)
ENSG00000165280.15_VCP	VCP	-0.145882	7.8885	-4.51282	1.18e-05	0.000475002	Significantly downregulated (Adj-P<0.01)
ENSG00000185559.14_DLK1	DLK1	0.700389	3.49263	4.50487	1.22e-05	0.000484422	Significantly upregulated (Adj-P<0.01)
ENSG00000157330.9_C1orf158	C1orf158	-2.16025	-2.27266	-4.61517	7.63e-06	0.000338285	Significantly downregulated (Adj-P<0.01)
ENSG00000152944.8_MED21	MED21	-0.219846	3.80573	-4.5042	1.22e-05	0.000484552	Significantly downregulated (Adj-P<0.01)
ENSG00000214021.15_TTLL3	TTLL3	0.246154	4.14794	4.51194	1.18e-05	0.000475002	Significantly upregulated (Adj-P<0.01)
ENSG00000105854.12_PON2	PON2	0.270518	2.92468	4.48509	1.32e-05	0.000514706	Significantly upregulated (Adj-P<0.01)
ENSG00000152767.16_FARP1	FARP1	0.519626	4.12984	4.50567	1.21e-05	0.000484019	Significantly upregulated (Adj-P<0.01)
ENSG00000090621.13_PABPC4	PABPC4	0.188856	8.48664	4.49256	1.28e-05	0.000503802	Significantly upregulated (Adj-P<0.01)
ENSG00000133935.6_ERG28	ERG28	-0.162539	2.90675	-4.47252	1.4e-05	0.000535943	Significantly downregulated (Adj-P<0.01)
ENSG00000235531.9_MSC-AS1	MSC-AS1	0.473552	0.204883	4.41815	1.75e-05	0.000635168	Significantly upregulated (Adj-P<0.01)
ENSG00000179855.6_GIPC3	GIPC3	0.438761	0.374684	4.41747	1.76e-05	0.000635503	Significantly upregulated (Adj-P<0.01)
ENSG00000197093.10_GAL3ST4	GAL3ST4	0.469101	-0.192616	4.41934	1.74e-05	0.000633488	Significantly upregulated (Adj-P<0.01)
ENSG00000186448.14_ZNF197	ZNF197	-0.199945	3.74975	-4.48864	1.31e-05	0.000509605	Significantly downregulated (Adj-P<0.01)
ENSG00000234545.7_FAM133B	FAM133B	-0.170654	3.7211	-4.48612	1.32e-05	0.000513771	Significantly downregulated (Adj-P<0.01)
ENSG00000197283.16_SYNGAP1	SYNGAP1	0.37702	1.48501	4.43274	1.65e-05	0.000607049	Significantly upregulated (Adj-P<0.01)
ENSG00000111647.12_UHRF1BP1L	UHRF1BP1L	0.326138	3.89459	4.49173	1.29e-05	0.000504299	Significantly upregulated (Adj-P<0.01)
ENSG00000231628.1_AL133406.2		-0.450752	1.83429	-4.43374	1.64e-05	0.0006065	Significantly downregulated (Adj-P<0.01)
ENSG00000126878.12_AIF1L	AIF1L	0.360809	3.57721	4.48432	1.33e-05	0.000515092	Significantly upregulated (Adj-P<0.01)
ENSG00000220205.8_VAMP2	VAMP2	-0.164351	5.41378	-4.49885	1.25e-05	0.000494342	Significantly downregulated (Adj-P<0.01)
ENSG00000124207.16_CSE1L	CSE1L	-0.183128	5.50007	-4.49371	1.28e-05	0.000502613	Significantly downregulated (Adj-P<0.01)
ENSG00000257913.2_DDN-AS1	DDN-AS1	0.556989	-0.375491	4.4066	1.84e-05	0.000658225	Significantly upregulated (Adj-P<0.01)
ENSG00000107819.13_SFXN3	SFXN3	0.339351	2.34459	4.43948	1.6e-05	0.000595625	Significantly upregulated (Adj-P<0.01)
ENSG00000171408.13_PDE7B	PDE7B	0.253454	2.7919	4.44677	1.56e-05	0.000584039	Significantly upregulated (Adj-P<0.01)
ENSG00000100918.12_REC8	REC8	0.436481	0.131955	4.39508	1.93e-05	0.000673684	Significantly upregulated (Adj-P<0.01)
ENSG00000132464.11_ENAM	ENAM	-0.420953	2.80157	-4.43724	1.62e-05	0.000599114	Significantly downregulated (Adj-P<0.01)
ENSG00000087245.12_MMP2	MMP2	0.551115	4.5339	4.48079	1.35e-05	0.000521508	Significantly upregulated (Adj-P<0.01)
ENSG00000121653.11_MAPK8IP1	MAPK8IP1	0.518001	0.576264	4.39266	1.95e-05	0.000675797	Significantly upregulated (Adj-P<0.01)
ENSG00000175471.19_MCTP1	MCTP1	0.525776	0.598486	4.38884	1.98e-05	0.000681022	Significantly upregulated (Adj-P<0.01)
ENSG00000118946.11_PCDH17	PCDH17	0.658344	-0.348868	4.39467	1.93e-05	0.000673684	Significantly upregulated (Adj-P<0.01)
ENSG00000170955.9_CAVIN3	CAVIN3	0.43587	3.08333	4.44595	1.56e-05	0.000584652	Significantly upregulated (Adj-P<0.01)
ENSG00000125848.9_FLRT3	FLRT3	-0.5573	2.40134	-4.4146	1.78e-05	0.000641639	Significantly downregulated (Adj-P<0.01)
ENSG00000109016.17_DHRS7B	DHRS7B	-0.214246	4.29974	-4.46613	1.43e-05	0.000546488	Significantly downregulated (Adj-P<0.01)
ENSG00000189241.6_TSPYL1	TSPYL1	-0.272284	7.50838	-4.46016	1.47e-05	0.000556244	Significantly downregulated (Adj-P<0.01)
ENSG00000124160.11_NCOA5	NCOA5	-0.174584	3.60324	-4.44453	1.57e-05	0.000585551	Significantly downregulated (Adj-P<0.01)
ENSG00000280407.2_AC132872.4		0.444098	0.355112	4.37388	2.1e-05	0.000711954	Significantly upregulated (Adj-P<0.01)
ENSG00000081277.12_PKP1	PKP1	0.567811	2.03408	4.40624	1.84e-05	0.000658225	Significantly upregulated (Adj-P<0.01)
ENSG00000107338.9_SHB	SHB	0.449793	1.72495	4.39267	1.95e-05	0.000675797	Significantly upregulated (Adj-P<0.01)
ENSG00000196091.13_MYBPC1	MYBPC1	-0.204396	13.6732	-4.3959	1.92e-05	0.000673563	Significantly downregulated (Adj-P<0.01)
ENSG00000127951.6_FGL2	FGL2	0.570907	3.16604	4.43061	1.66e-05	0.000608373	Significantly upregulated (Adj-P<0.01)
ENSG00000162458.12_FBLIM1	FBLIM1	0.536237	0.540969	4.36801	2.16e-05	0.000720083	Significantly upregulated (Adj-P<0.01)
ENSG00000124181.14_PLCG1	PLCG1	0.174177	4.85249	4.45533	1.5e-05	0.000564889	Significantly upregulated (Adj-P<0.01)
ENSG00000134247.9_PTGFRN	PTGFRN	0.468749	2.33889	4.40318	1.86e-05	0.000663623	Significantly upregulated (Adj-P<0.01)
ENSG00000075651.15_PLD1	PLD1	0.350784	1.37341	4.37494	2.1e-05	0.00071192	Significantly upregulated (Adj-P<0.01)
ENSG00000140525.17_FANCI	FANCI	0.504333	-0.638366	4.37236	2.12e-05	0.000713339	Significantly upregulated (Adj-P<0.01)
ENSG00000171055.14_FEZ2	FEZ2	-0.414745	6.7316	-4.44444	1.57e-05	0.000585551	Significantly downregulated (Adj-P<0.01)
ENSG00000158270.11_COLEC12	COLEC12	0.5062	2.46646	4.39624	1.92e-05	0.000673563	Significantly upregulated (Adj-P<0.01)
ENSG00000091536.17_MYO15A	MYO15A	0.717859	-0.795694	4.36264	2.2e-05	0.000733062	Significantly upregulated (Adj-P<0.01)
ENSG00000026652.13_AGPAT4	AGPAT4	0.40825	0.635783	4.35687	2.26e-05	0.000744352	Significantly upregulated (Adj-P<0.01)
ENSG00000132357.13_CARD6	CARD6	0.361806	0.991868	4.35896	2.24e-05	0.000739555	Significantly upregulated (Adj-P<0.01)
ENSG00000115155.17_OTOF	OTOF	0.94001	-1.31489	4.37815	2.07e-05	0.000705583	Significantly upregulated (Adj-P<0.01)
ENSG00000105722.9_ERF	ERF	0.386942	2.21151	4.3923	1.95e-05	0.000675797	Significantly upregulated (Adj-P<0.01)
ENSG00000162998.4_FRZB	FRZB	0.915819	4.51528	4.43921	1.61e-05	0.000595625	Significantly upregulated (Adj-P<0.01)
ENSG00000112769.18_LAMA4	LAMA4	0.480209	3.87346	4.43019	1.67e-05	0.000608373	Significantly upregulated (Adj-P<0.01)
ENSG00000153574.8_RPIA	RPIA	-0.164694	3.99864	-4.43071	1.66e-05	0.000608373	Significantly downregulated (Adj-P<0.01)
ENSG00000055955.15_ITIH4	ITIH4	0.457737	6.03711	4.43239	1.65e-05	0.000607049	Significantly upregulated (Adj-P<0.01)
ENSG00000066735.14_KIF26A	KIF26A	0.406747	2.47931	4.39057	1.96e-05	0.000677671	Significantly upregulated (Adj-P<0.01)
ENSG00000112699.10_GMDS	GMDS	0.375864	0.599972	4.34226	2.4e-05	0.000782207	Significantly upregulated (Adj-P<0.01)
ENSG00000140471.16_LINS1	LINS1	-0.243505	2.16768	-4.37004	2.14e-05	0.000716218	Significantly downregulated (Adj-P<0.01)
ENSG00000121067.17_SPOP	SPOP	-0.142388	5.21392	-4.42857	1.68e-05	0.000611058	Significantly downregulated (Adj-P<0.01)
ENSG00000115310.17_RTN4	RTN4	-0.202201	8.92431	-4.40072	1.88e-05	0.000667965	Significantly downregulated (Adj-P<0.01)
ENSG00000138347.15_MYPN	MYPN	-0.198032	8.81267	-4.40051	1.89e-05	0.000667965	Significantly downregulated (Adj-P<0.01)
ENSG00000141965.4_FEM1A	FEM1A	-0.287355	7.93782	-4.40797	1.83e-05	0.000656509	Significantly downregulated (Adj-P<0.01)
ENSG00000213585.10_VDAC1	VDAC1	-0.181479	8.89647	-4.39683	1.91e-05	0.000673563	Significantly downregulated (Adj-P<0.01)
ENSG00000169612.3_RAMAC	RAMAC	-0.187614	3.65963	-4.40336	1.86e-05	0.000663623	Significantly downregulated (Adj-P<0.01)
ENSG00000130038.9_CRACR2A	CRACR2A	0.466812	-0.193642	4.32651	2.56e-05	0.000816745	Significantly upregulated (Adj-P<0.01)
ENSG00000135643.4_KCNMB4	KCNMB4	0.370024	0.713644	4.32639	2.56e-05	0.000816745	Significantly upregulated (Adj-P<0.01)
ENSG00000117724.12_CENPF	CENPF	0.64578	-1.14343	4.35337	2.29e-05	0.000753583	Significantly upregulated (Adj-P<0.01)
ENSG00000184787.18_UBE2G2	UBE2G2	-0.109144	6.65696	-4.41085	1.81e-05	0.000650195	Significantly downregulated (Adj-P<0.01)
ENSG00000137501.17_SYTL2	SYTL2	0.414386	2.31765	4.35984	2.23e-05	0.000739555	Significantly upregulated (Adj-P<0.01)
ENSG00000163485.16_ADORA1	ADORA1	0.655671	-0.462304	4.32449	2.58e-05	0.000816745	Significantly upregulated (Adj-P<0.01)
ENSG00000164402.13_SEPT8	SEPT8	0.259863	2.98635	4.38009	2.05e-05	0.0007015	Significantly upregulated (Adj-P<0.01)
ENSG00000146674.14_IGFBP3	IGFBP3	0.521237	3.1147	4.38426	2.02e-05	0.000691005	Significantly upregulated (Adj-P<0.01)
ENSG00000125434.10_SLC25A35	SLC25A35	0.456097	0.121873	4.31564	2.67e-05	0.000837454	Significantly upregulated (Adj-P<0.01)
ENSG00000242265.5_PEG10	PEG10	0.542722	2.08014	4.35042	2.32e-05	0.000759586	Significantly upregulated (Adj-P<0.01)
ENSG00000165886.4_UBTD1	UBTD1	-0.418717	3.436	-4.38467	2.01e-05	0.000691005	Significantly downregulated (Adj-P<0.01)
ENSG00000161649.12_CD300LG	CD300LG	0.46547	3.00854	4.37571	2.09e-05	0.000711202	Significantly upregulated (Adj-P<0.01)
ENSG00000223403.4_MEG9	MEG9	0.510869	-0.0427358	4.30465	2.8e-05	0.000872391	Significantly upregulated (Adj-P<0.01)
ENSG00000136861.17_CDK5RAP2	CDK5RAP2	-0.175529	6.22762	-4.39824	1.9e-05	0.000672746	Significantly downregulated (Adj-P<0.01)
ENSG00000076685.18_NT5C2	NT5C2	-0.262711	6.78015	-4.39135	1.96e-05	0.000676959	Significantly downregulated (Adj-P<0.01)
ENSG00000113811.10_SELENOK	SELENOK	-0.192871	5.60969	-4.39578	1.92e-05	0.000673563	Significantly downregulated (Adj-P<0.01)
ENSG00000271270.6_TMCC1-AS1	TMCC1-AS1	0.399457	-0.116975	4.29878	2.86e-05	0.000888206	Significantly upregulated (Adj-P<0.01)
ENSG00000147408.14_CSGALNACT1	CSGALNACT1	0.398143	1.76915	4.32388	2.58e-05	0.000816745	Significantly upregulated (Adj-P<0.01)
ENSG00000005100.12_DHX33	DHX33	0.169653	3.36369	4.36983	2.14e-05	0.000716218	Significantly upregulated (Adj-P<0.01)
ENSG00000139668.8_WDFY2	WDFY2	0.326375	1.85964	4.32425	2.58e-05	0.000816745	Significantly upregulated (Adj-P<0.01)
ENSG00000157870.15_PRXL2B	PRXL2B	0.479008	0.734497	4.29802	2.87e-05	0.000889214	Significantly upregulated (Adj-P<0.01)
ENSG00000106483.11_SFRP4	SFRP4	0.824589	2.24825	4.32695	2.55e-05	0.000816745	Significantly upregulated (Adj-P<0.01)
ENSG00000011638.10_TMEM159	TMEM159	-0.333882	6.39449	-4.37179	2.12e-05	0.000713492	Significantly downregulated (Adj-P<0.01)
ENSG00000147027.3_TMEM47	TMEM47	-0.275268	5.32966	-4.37429	2.1e-05	0.000711954	Significantly downregulated (Adj-P<0.01)
ENSG00000205683.11_DPF3	DPF3	-0.182722	4.91823	-4.37255	2.12e-05	0.000713339	Significantly downregulated (Adj-P<0.01)
ENSG00000162551.13_ALPL	ALPL	0.735618	-1.00656	4.29714	2.88e-05	0.000890643	Significantly upregulated (Adj-P<0.01)
ENSG00000104365.14_IKBKB	IKBKB	0.341322	5.6981	4.36437	2.19e-05	0.000729397	Significantly upregulated (Adj-P<0.01)
ENSG00000173757.9_STAT5B	STAT5B	-0.202584	6.69733	-4.35925	2.24e-05	0.000739555	Significantly downregulated (Adj-P<0.01)
ENSG00000106615.9_RHEB	RHEB	-0.136383	5.72158	-4.35183	2.3e-05	0.000756779	Significantly downregulated (Adj-P<0.01)
ENSG00000162545.5_CAMK2N1	CAMK2N1	0.332621	1.67156	4.27495	3.15e-05	0.00094857	Significantly upregulated (Adj-P<0.01)
ENSG00000197774.12_EME2	EME2	0.261102	3.19717	4.32477	2.57e-05	0.000816745	Significantly upregulated (Adj-P<0.01)
ENSG00000104221.12_BRF2	BRF2	-0.185265	3.99197	-4.33857	2.43e-05	0.000792464	Significantly downregulated (Adj-P<0.01)
ENSG00000259642.2_ST20-AS1	ST20-AS1	0.501503	-0.112081	4.24884	3.51e-05	0.00102461	Significantly upregulated (Adj-P<0.01)
ENSG00000166997.7_CNPY4	CNPY4	0.359222	0.933059	4.25538	3.41e-05	0.00100753	Significantly upregulated (Adj-P<0.01)
ENSG00000112079.8_STK38	STK38	0.200917	3.69708	4.33073	2.51e-05	0.000811624	Significantly upregulated (Adj-P<0.01)
ENSG00000160408.14_ST6GALNAC6	ST6GALNAC6	-0.226784	5.04678	-4.34333	2.39e-05	0.000780388	Significantly downregulated (Adj-P<0.01)
ENSG00000198015.12_MRPL42	MRPL42	-0.207292	4.54939	-4.33707	2.45e-05	0.000795725	Significantly downregulated (Adj-P<0.01)
ENSG00000170871.11_KIAA0232	KIAA0232	-0.204719	6.64863	-4.3356	2.46e-05	0.000797228	Significantly downregulated (Adj-P<0.01)
ENSG00000121940.15_CLCC1	CLCC1	-0.164169	4.61609	-4.33626	2.46e-05	0.000796723	Significantly downregulated (Adj-P<0.01)
ENSG00000116857.16_TMEM9	TMEM9	0.465215	3.64713	4.32107	2.61e-05	0.000823983	Significantly upregulated (Adj-P<0.01)
ENSG00000100938.17_GMPR2	GMPR2	0.150943	4.03752	4.32603	2.56e-05	0.000816745	Significantly upregulated (Adj-P<0.01)
ENSG00000196284.15_SUPT3H	SUPT3H	0.357677	-0.0200715	4.23353	3.73e-05	0.00105483	Significantly upregulated (Adj-P<0.01)
ENSG00000070371.15_CLTCL1	CLTCL1	-0.248248	7.03454	-4.32581	2.56e-05	0.000816745	Significantly downregulated (Adj-P<0.01)
ENSG00000121361.3_KCNJ8	KCNJ8	0.356781	2.38085	4.27874	3.11e-05	0.000939475	Significantly upregulated (Adj-P<0.01)
ENSG00000183798.4_EMILIN3	EMILIN3	0.699456	-0.0154678	4.23074	3.77e-05	0.00105747	Significantly upregulated (Adj-P<0.01)
ENSG00000136436.14_CALCOCO2	CALCOCO2	-0.139111	6.50114	-4.32708	2.55e-05	0.000816745	Significantly downregulated (Adj-P<0.01)
ENSG00000179051.13_RCC2	RCC2	0.231438	2.9332	4.29309	2.93e-05	0.000897861	Significantly upregulated (Adj-P<0.01)
ENSG00000078140.13_UBE2K	UBE2K	-0.163945	5.38563	-4.32372	2.59e-05	0.000816745	Significantly downregulated (Adj-P<0.01)
ENSG00000065427.14_KARS	KARS	-0.134841	6.79948	-4.31715	2.66e-05	0.000833972	Significantly downregulated (Adj-P<0.01)
ENSG00000134717.17_BTF3L4	BTF3L4	-0.148234	5.17588	-4.31963	2.63e-05	0.000827203	Significantly downregulated (Adj-P<0.01)
ENSG00000104723.20_TUSC3	TUSC3	0.379951	1.25759	4.23223	3.75e-05	0.00105653	Significantly upregulated (Adj-P<0.01)
ENSG00000250451.5_HOXC-AS1	HOXC-AS1	-0.457207	1.06253	-4.22911	3.8e-05	0.0010604	Significantly downregulated (Adj-P<0.01)
ENSG00000144746.6_ARL6IP5	ARL6IP5	-0.165499	6.98771	-4.30757	2.76e-05	0.000863775	Significantly downregulated (Adj-P<0.01)
ENSG00000185507.20_IRF7	IRF7	0.46574	2.76584	4.27582	3.14e-05	0.000947031	Significantly upregulated (Adj-P<0.01)
ENSG00000164125.15_FAM198B	GASK1B	0.44915	3.7116	4.29128	2.95e-05	0.000901477	Significantly upregulated (Adj-P<0.01)
ENSG00000180190.11_TDRP	TDRP	0.341297	0.560297	4.20686	4.15e-05	0.00112942	Significantly upregulated (Adj-P<0.01)
ENSG00000143382.14_ADAMTSL4	ADAMTSL4	-0.509744	6.35019	-4.303	2.81e-05	0.000876521	Significantly downregulated (Adj-P<0.01)
ENSG00000162702.7_ZNF281	ZNF281	-0.24194	3.49067	-4.27305	3.18e-05	0.000952267	Significantly downregulated (Adj-P<0.01)
ENSG00000169504.14_CLIC4	CLIC4	0.414269	4.78715	4.29881	2.86e-05	0.000888206	Significantly upregulated (Adj-P<0.01)
ENSG00000141232.4_TOB1	TOB1	-0.255478	6.71664	-4.29439	2.91e-05	0.000896255	Significantly downregulated (Adj-P<0.01)
ENSG00000187955.11_COL14A1	COL14A1	0.924348	2.09843	4.23387	3.72e-05	0.00105483	Significantly upregulated (Adj-P<0.01)
ENSG00000198720.12_ANKRD13B	ANKRD13B	0.278773	1.90895	4.23068	3.77e-05	0.00105747	Significantly upregulated (Adj-P<0.01)
ENSG00000143569.18_UBAP2L	UBAP2L	-0.127714	5.617	-4.2965	2.89e-05	0.000891205	Significantly downregulated (Adj-P<0.01)
ENSG00000008838.19_MED24	MED24	-0.146184	6.12275	-4.29415	2.92e-05	0.000896255	Significantly downregulated (Adj-P<0.01)
ENSG00000121281.12_ADCY7	ADCY7	0.549334	1.65394	4.21879	3.96e-05	0.00109461	Significantly upregulated (Adj-P<0.01)
ENSG00000157916.19_RER1	RER1	-0.10274	5.66048	-4.29275	2.93e-05	0.000897861	Significantly downregulated (Adj-P<0.01)
ENSG00000143545.8_RAB13	RAB13	0.28596	3.88825	4.27886	3.1e-05	0.000939475	Significantly upregulated (Adj-P<0.01)
ENSG00000110906.12_KCTD10	KCTD10	0.199147	3.55828	4.26993	3.22e-05	0.000959685	Significantly upregulated (Adj-P<0.01)
ENSG00000187535.13_IFT140	IFT140	0.226913	2.42175	4.23678	3.68e-05	0.00105247	Significantly upregulated (Adj-P<0.01)
ENSG00000124374.8_PAIP2B	PAIP2B	-0.420679	7.06948	-4.2801	3.09e-05	0.000937929	Significantly downregulated (Adj-P<0.01)
ENSG00000220785.7_MTMR9LP	MTMR9LP	0.340695	1.95171	4.22044	3.93e-05	0.00109025	Significantly upregulated (Adj-P<0.01)
ENSG00000186377.7_CYP4X1	CYP4X1	-0.38745	1.58118	-4.20594	4.17e-05	0.00113163	Significantly downregulated (Adj-P<0.01)
ENSG00000248019.2_FAM13A-AS1	FAM13A-AS1	-0.318204	2.25221	-4.22232	3.9e-05	0.0010878	Significantly downregulated (Adj-P<0.01)
ENSG00000013619.13_MAMLD1	MAMLD1	-0.302672	2.63122	-4.23545	3.7e-05	0.00105483	Significantly downregulated (Adj-P<0.01)
ENSG00000115839.17_RAB3GAP1	RAB3GAP1	-0.142269	5.76952	-4.28457	3.03e-05	0.000924636	Significantly downregulated (Adj-P<0.01)
ENSG00000128596.16_CCDC136	CCDC136	0.662621	1.65348	4.20817	4.13e-05	0.00112632	Significantly upregulated (Adj-P<0.01)
ENSG00000185339.8_TCN2	TCN2	0.41986	1.27598	4.19467	4.36e-05	0.00116772	Significantly upregulated (Adj-P<0.01)
ENSG00000178585.14_CTNNBIP1	CTNNBIP1	0.296145	3.99615	4.27353	3.17e-05	0.000952218	Significantly upregulated (Adj-P<0.01)
ENSG00000248713.1_C4orf54	C4orf54	0.410003	7.39914	4.27072	3.21e-05	0.00095948	Significantly upregulated (Adj-P<0.01)
ENSG00000028310.17_BRD9	BRD9	-0.130347	4.37884	-4.27656	3.13e-05	0.000946014	Significantly downregulated (Adj-P<0.01)
ENSG00000119812.18_FAM98A	FAM98A	-0.151237	5.29296	-4.28202	3.07e-05	0.000932426	Significantly downregulated (Adj-P<0.01)
ENSG00000101412.12_E2F1	E2F1	0.372344	0.525995	4.17974	4.63e-05	0.00121871	Significantly upregulated (Adj-P<0.01)
ENSG00000186352.8_ANKRD37	ANKRD37	-0.398877	3.18061	-4.24646	3.54e-05	0.00103092	Significantly downregulated (Adj-P<0.01)
ENSG00000169758.12_TMEM266	TMEM266	-0.43945	3.11619	-4.24228	3.6e-05	0.00103691	Significantly downregulated (Adj-P<0.01)
ENSG00000133112.16_TPT1	TPT1	-0.168406	12.2492	-4.21655	3.99e-05	0.00109687	Significantly downregulated (Adj-P<0.01)
ENSG00000155366.16_RHOC	RHOC	0.309085	4.30104	4.26973	3.22e-05	0.000959685	Significantly upregulated (Adj-P<0.01)
ENSG00000103056.11_SMPD3	SMPD3	0.46769	2.54969	4.23095	3.77e-05	0.00105747	Significantly upregulated (Adj-P<0.01)
ENSG00000168246.5_UBTD2	UBTD2	0.193632	2.99661	4.23409	3.72e-05	0.00105483	Significantly upregulated (Adj-P<0.01)
ENSG00000184185.9_KCNJ12	KCNJ12	-0.304255	6.6843	-4.26472	3.29e-05	0.000975663	Significantly downregulated (Adj-P<0.01)
ENSG00000142784.15_WDTC1	WDTC1	-0.142746	6.70226	-4.26303	3.31e-05	0.000980494	Significantly downregulated (Adj-P<0.01)
ENSG00000156535.14_CD109	CD109	0.450342	1.55928	4.18695	4.5e-05	0.00119416	Significantly upregulated (Adj-P<0.01)
ENSG00000261408.7_TEN1-CDK3	TEN1-CDK3	0.49393	0.522809	4.16653	4.88e-05	0.00127185	Significantly upregulated (Adj-P<0.01)
ENSG00000111011.17_RSRC2	RSRC2	-0.113355	5.5132	-4.26686	3.26e-05	0.000969065	Significantly downregulated (Adj-P<0.01)
ENSG00000138411.12_HECW2	HECW2	0.584857	2.04346	4.19817	4.3e-05	0.00115346	Significantly upregulated (Adj-P<0.01)
ENSG00000136813.14_ECPAS	ECPAS	-0.17312	8.02457	-4.2497	3.49e-05	0.0010244	Significantly downregulated (Adj-P<0.01)
ENSG00000117480.15_FAAH	FAAH	-0.305918	3.80056	-4.24942	3.5e-05	0.0010244	Significantly downregulated (Adj-P<0.01)
ENSG00000122367.19_LDB3	LDB3	-0.205799	11.053	-4.21473	4.02e-05	0.00110192	Significantly downregulated (Adj-P<0.01)
ENSG00000130147.15_SH3BP4	SH3BP4	0.445568	1.83533	4.18995	4.44e-05	0.0011819	Significantly upregulated (Adj-P<0.01)
ENSG00000167695.14_FAM57A	FAM57A	0.35385	0.0132409	4.15638	5.08e-05	0.00131099	Significantly upregulated (Adj-P<0.01)
ENSG00000278959.1_AC006378.2		-0.591458	-0.556668	-4.1647	4.91e-05	0.00127688	Significantly downregulated (Adj-P<0.01)
ENSG00000110696.9_C11orf58	C11orf58	-0.131713	6.14494	-4.25769	3.38e-05	0.00100004	Significantly downregulated (Adj-P<0.01)
ENSG00000100316.15_RPL3	RPL3	0.305191	6.69747	4.2525	3.45e-05	0.00101742	Significantly upregulated (Adj-P<0.01)
ENSG00000163762.6_TM4SF18	TM4SF18	0.47837	2.11666	4.19121	4.42e-05	0.00118016	Significantly upregulated (Adj-P<0.01)
ENSG00000139880.19_CDH24	CDH24	0.671484	-0.494924	4.14958	5.22e-05	0.00133829	Significantly upregulated (Adj-P<0.01)
ENSG00000091986.15_CCDC80	CCDC80	0.763625	4.05146	4.24477	3.56e-05	0.00103217	Significantly upregulated (Adj-P<0.01)
ENSG00000142173.14_COL6A2	COL6A2	0.432647	6.795	4.24536	3.56e-05	0.00103217	Significantly upregulated (Adj-P<0.01)
ENSG00000183762.12_KREMEN1	KREMEN1	-0.278547	6.07679	-4.25167	3.47e-05	0.00101893	Significantly downregulated (Adj-P<0.01)
ENSG00000116962.14_NID1	NID1	0.41202	3.97457	4.24094	3.62e-05	0.00103979	Significantly upregulated (Adj-P<0.01)
ENSG00000223784.2_LINP1	LINP1	0.326747	2.95492	4.21658	3.99e-05	0.00109687	Significantly upregulated (Adj-P<0.01)
ENSG00000071246.10_VASH1	VASH1	0.369868	3.52744	4.22952	3.79e-05	0.0010604	Significantly upregulated (Adj-P<0.01)
ENSG00000111481.9_COPZ1	COPZ1	-0.113446	5.49232	-4.24844	3.51e-05	0.00102461	Significantly downregulated (Adj-P<0.01)
ENSG00000147274.14_RBMX	RBMX	-0.180092	6.25125	-4.24433	3.57e-05	0.00103217	Significantly downregulated (Adj-P<0.01)
ENSG00000174243.9_DDX23	DDX23	-0.158899	5.53682	-4.24483	3.56e-05	0.00103217	Significantly downregulated (Adj-P<0.01)
ENSG00000100462.15_PRMT5	PRMT5	-0.145373	4.77487	-4.24322	3.59e-05	0.00103489	Significantly downregulated (Adj-P<0.01)
ENSG00000205978.5_NYNRIN	NYNRIN	0.316676	2.64531	4.20013	4.27e-05	0.00114637	Significantly upregulated (Adj-P<0.01)
ENSG00000159251.7_ACTC1	ACTC1	1.15024	5.74228	4.24069	3.62e-05	0.00103979	Significantly upregulated (Adj-P<0.01)
ENSG00000122359.17_ANXA11	ANXA11	-0.169473	7.02933	-4.23442	3.72e-05	0.00105483	Significantly downregulated (Adj-P<0.01)
ENSG00000115318.11_LOXL3	LOXL3	0.509514	-0.00192659	4.13399	5.55e-05	0.00140299	Significantly upregulated (Adj-P<0.01)
ENSG00000114784.3_EIF1B	EIF1B	-0.151258	5.16372	-4.23855	3.65e-05	0.0010469	Significantly downregulated (Adj-P<0.01)
ENSG00000131779.10_PEX11B	PEX11B	-0.140991	3.74382	-4.22133	3.92e-05	0.00108831	Significantly downregulated (Adj-P<0.01)
ENSG00000198542.13_ITGBL1	ITGBL1	0.483923	1.82763	4.16193	4.97e-05	0.00128892	Significantly upregulated (Adj-P<0.01)
ENSG00000157554.18_ERG	ERG	0.333834	2.74458	4.19075	4.43e-05	0.00118016	Significantly upregulated (Adj-P<0.01)
ENSG00000013374.16_NUB1	NUB1	-0.141745	5.41537	-4.23439	3.72e-05	0.00105483	Significantly downregulated (Adj-P<0.01)
ENSG00000143401.14_ANP32E	ANP32E	-0.18542	5.14559	-4.23272	3.74e-05	0.00105634	Significantly downregulated (Adj-P<0.01)
ENSG00000198753.11_PLXNB3	PLXNB3	0.771461	-1.145	4.13577	5.51e-05	0.00139536	Significantly upregulated (Adj-P<0.01)
ENSG00000075073.14_TACR2	TACR2	0.482395	-0.151195	4.12345	5.79e-05	0.00142863	Significantly upregulated (Adj-P<0.01)
ENSG00000169131.12_ZNF354A	ZNF354A	0.290443	1.86432	4.1592	5.02e-05	0.00129872	Significantly upregulated (Adj-P<0.01)
ENSG00000185361.8_TNFAIP8L1	TNFAIP8L1	0.298795	2.56364	4.18036	4.62e-05	0.00121775	Significantly upregulated (Adj-P<0.01)
ENSG00000163872.15_YEATS2	YEATS2	0.184064	3.32787	4.2018	4.24e-05	0.00114263	Significantly upregulated (Adj-P<0.01)
ENSG00000125841.12_NRSN2	NRSN2	0.427251	0.297109	4.12038	5.86e-05	0.00143919	Significantly upregulated (Adj-P<0.01)
ENSG00000119401.10_TRIM32	TRIM32	-0.198946	4.16672	-4.21632	4e-05	0.00109687	Significantly downregulated (Adj-P<0.01)
ENSG00000177628.15_GBA	GBA	0.246063	2.08916	4.16086	4.99e-05	0.00129231	Significantly upregulated (Adj-P<0.01)
ENSG00000111276.10_CDKN1B	CDKN1B	-0.1892	6.3345	-4.22188	3.91e-05	0.00108782	Significantly downregulated (Adj-P<0.01)
ENSG00000159216.18_RUNX1	RUNX1	0.779697	1.51734	4.14435	5.33e-05	0.00136101	Significantly upregulated (Adj-P<0.01)
ENSG00000124783.13_SSR1	SSR1	-0.137386	4.58529	-4.21857	3.96e-05	0.00109461	Significantly downregulated (Adj-P<0.01)
ENSG00000176783.14_RUFY1	RUFY1	-0.131673	4.40473	-4.21631	4e-05	0.00109687	Significantly downregulated (Adj-P<0.01)
ENSG00000235513.1_AL035681.1		0.536492	-0.94138	4.12415	5.77e-05	0.00142863	Significantly upregulated (Adj-P<0.01)
ENSG00000129465.15_RIPK3	RIPK3	0.523768	-0.45876	4.11003	6.1e-05	0.00148722	Significantly upregulated (Adj-P<0.01)
ENSG00000168334.8_XIRP1	XIRP1	-0.53224	8.01854	-4.20227	4.23e-05	0.00114245	Significantly downregulated (Adj-P<0.01)
ENSG00000011009.10_LYPLA2	LYPLA2	-0.199704	3.90448	-4.20104	4.25e-05	0.00114415	Significantly downregulated (Adj-P<0.01)
ENSG00000222009.8_BTBD19	BTBD19	0.426284	0.210668	4.1042	6.24e-05	0.00151478	Significantly upregulated (Adj-P<0.01)
ENSG00000167632.15_TRAPPC9	TRAPPC9	-0.16939	5.40689	-4.21311	4.05e-05	0.0011072	Significantly downregulated (Adj-P<0.01)
ENSG00000128016.5_ZFP36	ZFP36	-0.555721	4.60494	-4.20797	4.13e-05	0.00112632	Significantly downregulated (Adj-P<0.01)
ENSG00000126218.11_F10	F10	0.495262	1.13353	4.11969	5.87e-05	0.00144057	Significantly upregulated (Adj-P<0.01)
ENSG00000126785.12_RHOJ	RHOJ	0.278756	2.40864	4.15042	5.2e-05	0.00133604	Significantly upregulated (Adj-P<0.01)
ENSG00000172466.15_ZNF24	ZNF24	-0.196609	5.76326	-4.2049	4.18e-05	0.0011344	Significantly downregulated (Adj-P<0.01)
ENSG00000140557.11_ST8SIA2	ST8SIA2	1.21222	-1.51306	4.12396	5.78e-05	0.00142863	Significantly upregulated (Adj-P<0.01)
ENSG00000101161.7_PRPF6	PRPF6	-0.156656	5.90126	-4.20286	4.22e-05	0.00114175	Significantly downregulated (Adj-P<0.01)
ENSG00000092529.23_CAPN3	CAPN3	-0.158452	9.54395	-4.16776	4.85e-05	0.00126773	Significantly downregulated (Adj-P<0.01)
ENSG00000144339.11_TMEFF2	TMEFF2	0.825297	-1.30942	4.10377	6.25e-05	0.00151501	Significantly upregulated (Adj-P<0.01)
ENSG00000132334.16_PTPRE	PTPRE	0.541442	0.626464	4.09235	6.54e-05	0.00155816	Significantly upregulated (Adj-P<0.01)
ENSG00000041357.15_PSMA4	PSMA4	-0.127881	5.98486	-4.19113	4.42e-05	0.00118016	Significantly downregulated (Adj-P<0.01)
ENSG00000172037.13_LAMB2	LAMB2	0.21171	7.07264	4.1824	4.58e-05	0.00121194	Significantly upregulated (Adj-P<0.01)
ENSG00000133135.13_RNF128	RNF128	-0.249415	3.14284	-4.156	5.09e-05	0.00131099	Significantly downregulated (Adj-P<0.01)
ENSG00000175463.11_TBC1D10C	TBC1D10C	0.629978	0.247953	4.08224	6.81e-05	0.00159464	Significantly upregulated (Adj-P<0.01)
ENSG00000105568.17_PPP2R1A	PPP2R1A	-0.147901	7.04834	-4.18052	4.61e-05	0.00121775	Significantly downregulated (Adj-P<0.01)
ENSG00000170275.14_CRTAP	CRTAP	0.251698	6.04491	4.18553	4.52e-05	0.0011989	Significantly upregulated (Adj-P<0.01)
ENSG00000106823.12_ECM2	ECM2	0.523819	2.62476	4.13918	5.44e-05	0.00138114	Significantly upregulated (Adj-P<0.01)
ENSG00000164309.14_CMYA5	CMYA5	-0.276748	12.2921	-4.12521	5.75e-05	0.00142863	Significantly downregulated (Adj-P<0.01)
ENSG00000124593.16_AL365205.1		0.308561	2.18713	4.12374	5.78e-05	0.00142863	Significantly upregulated (Adj-P<0.01)
ENSG00000105270.14_CLIP3	CLIP3	0.400752	0.482658	4.07285	7.06e-05	0.00163011	Significantly upregulated (Adj-P<0.01)
ENSG00000170312.15_CDK1	CDK1	0.526605	-1.04013	4.08446	6.75e-05	0.00158793	Significantly upregulated (Adj-P<0.01)
ENSG00000023902.13_PLEKHO1	PLEKHO1	0.305719	4.35372	4.17334	4.75e-05	0.00124401	Significantly upregulated (Adj-P<0.01)
ENSG00000180398.12_MCFD2	MCFD2	-0.189732	6.26854	-4.17449	4.73e-05	0.00124036	Significantly downregulated (Adj-P<0.01)
ENSG00000088832.16_FKBP1A	FKBP1A	0.141084	5.31951	4.17558	4.7e-05	0.00123705	Significantly upregulated (Adj-P<0.01)
ENSG00000285781.1_AL117340.1		-0.438116	0.195412	-4.06134	7.39e-05	0.00168051	Significantly downregulated (Adj-P<0.01)
ENSG00000213551.4_DNAJC9	DNAJC9	0.135214	3.31619	4.14544	5.3e-05	0.00135823	Significantly upregulated (Adj-P<0.01)
ENSG00000165698.15_SPACA9	SPACA9	0.460125	-0.876266	4.06866	7.18e-05	0.00164979	Significantly upregulated (Adj-P<0.01)
ENSG00000101052.12_IFT52	IFT52	0.309127	0.945635	4.07194	7.09e-05	0.00163354	Significantly upregulated (Adj-P<0.01)
ENSG00000106624.10_AEBP1	AEBP1	0.606657	2.68356	4.12625	5.72e-05	0.00142863	Significantly upregulated (Adj-P<0.01)
ENSG00000121297.6_TSHZ3	TSHZ3	0.345369	0.79185	4.06825	7.19e-05	0.00164997	Significantly upregulated (Adj-P<0.01)
ENSG00000214456.8_PLIN5	PLIN5	-0.493469	6.7385	-4.16565	4.89e-05	0.00127416	Significantly downregulated (Adj-P<0.01)
ENSG00000103507.13_BCKDK	BCKDK	0.238853	5.56033	4.16941	4.82e-05	0.00126152	Significantly upregulated (Adj-P<0.01)
ENSG00000129474.15_AJUBA	AJUBA	0.467346	0.320878	4.0559	7.55e-05	0.00170178	Significantly upregulated (Adj-P<0.01)
ENSG00000153885.14_KCTD15	KCTD15	0.493465	1.70925	4.08791	6.66e-05	0.00157367	Significantly upregulated (Adj-P<0.01)
ENSG00000196155.12_PLEKHG4	PLEKHG4	0.405063	0.674151	4.06166	7.38e-05	0.00168051	Significantly upregulated (Adj-P<0.01)
ENSG00000279453.1_Z99129.4		-0.262433	3.33686	-4.13659	5.49e-05	0.0013931	Significantly downregulated (Adj-P<0.01)
ENSG00000182240.15_BACE2	BACE2	0.295719	2.12766	4.09832	6.39e-05	0.00153751	Significantly upregulated (Adj-P<0.01)
ENSG00000134917.9_ADAMTS8	ADAMTS8	0.909244	-0.128206	4.04579	7.85e-05	0.00174348	Significantly upregulated (Adj-P<0.01)
ENSG00000018408.14_WWTR1	WWTR1	0.297474	3.87675	4.1441	5.33e-05	0.00136101	Significantly upregulated (Adj-P<0.01)
ENSG00000164902.13_PHAX	PHAX	-0.127488	4.49445	-4.15434	5.12e-05	0.00131751	Significantly downregulated (Adj-P<0.01)
ENSG00000143797.11_MBOAT2	MBOAT2	0.457596	0.248804	4.04568	7.85e-05	0.00174348	Significantly upregulated (Adj-P<0.01)
ENSG00000069275.12_NUCKS1	NUCKS1	-0.168919	7.97315	-4.1437	5.34e-05	0.00136101	Significantly downregulated (Adj-P<0.01)
ENSG00000114670.13_NEK11	NEK11	0.342462	0.286932	4.04572	7.85e-05	0.00174348	Significantly upregulated (Adj-P<0.01)
ENSG00000117594.9_HSD11B1	HSD11B1	-0.477671	0.239378	-4.04229	7.96e-05	0.00176168	Significantly downregulated (Adj-P<0.01)
ENSG00000113083.13_LOX	LOX	0.593637	0.585785	4.04729	7.8e-05	0.00174245	Significantly upregulated (Adj-P<0.01)
ENSG00000162129.13_CLPB	CLPB	0.194842	3.82791	4.14094	5.4e-05	0.00137376	Significantly upregulated (Adj-P<0.01)
ENSG00000104774.12_MAN2B1	MAN2B1	0.264603	3.45716	4.13027	5.63e-05	0.00141489	Significantly upregulated (Adj-P<0.01)
ENSG00000116991.10_SIPA1L2	SIPA1L2	0.469214	3.214	4.1235	5.79e-05	0.00142863	Significantly upregulated (Adj-P<0.01)
ENSG00000130816.15_DNMT1	DNMT1	0.223617	3.17757	4.12033	5.86e-05	0.00143919	Significantly upregulated (Adj-P<0.01)
ENSG00000166681.13_BEX3	BEX3	0.349579	1.83783	4.07304	7.06e-05	0.00163011	Significantly upregulated (Adj-P<0.01)
ENSG00000160298.17_C21orf58	C21orf58	0.302568	0.626527	4.03716	8.12e-05	0.00178215	Significantly upregulated (Adj-P<0.01)
ENSG00000233117.2_LINC00702	LINC00702	0.811304	1.15687	4.04883	7.76e-05	0.00174194	Significantly upregulated (Adj-P<0.01)
ENSG00000166343.9_MSS51	MSS51	0.341887	7.42582	4.12983	5.64e-05	0.00141489	Significantly upregulated (Adj-P<0.01)
ENSG00000106682.14_EIF4H	EIF4H	-0.155627	7.87178	-4.12663	5.71e-05	0.00142863	Significantly downregulated (Adj-P<0.01)
ENSG00000224281.4_SLC25A5-AS1	SLC25A5-AS1	0.290616	0.864025	4.03906	8.06e-05	0.00177647	Significantly upregulated (Adj-P<0.01)
ENSG00000248441.6_LINC01197	LINC01197	0.624836	-1.21034	4.04949	7.74e-05	0.00173991	Significantly upregulated (Adj-P<0.01)
ENSG00000142303.13_ADAMTS10	ADAMTS10	0.365652	2.32291	4.08635	6.7e-05	0.00157855	Significantly upregulated (Adj-P<0.01)
ENSG00000178922.16_HYI	HYI	-0.273942	3.83636	-4.12323	5.79e-05	0.00142863	Significantly downregulated (Adj-P<0.01)
ENSG00000142156.14_COL6A1	COL6A1	0.350913	6.74731	4.13159	5.6e-05	0.00141184	Significantly upregulated (Adj-P<0.01)
ENSG00000182224.11_CYB5D1	CYB5D1	0.188859	2.98122	4.09807	6.4e-05	0.00153751	Significantly upregulated (Adj-P<0.01)
ENSG00000079246.15_XRCC5	XRCC5	-0.133669	6.41312	-4.1302	5.63e-05	0.00141489	Significantly downregulated (Adj-P<0.01)
ENSG00000273151.1_AC073957.3		0.27119	2.48396	4.07929	6.89e-05	0.00160604	Significantly upregulated (Adj-P<0.01)
ENSG00000171497.4_PPID	PPID	-0.148571	5.34182	-4.13171	5.6e-05	0.00141184	Significantly downregulated (Adj-P<0.01)
ENSG00000137275.13_RIPK1	RIPK1	0.172254	3.16381	4.09825	6.39e-05	0.00153751	Significantly upregulated (Adj-P<0.01)
ENSG00000119969.14_HELLS	HELLS	0.642134	-1.2371	4.04079	8e-05	0.00176953	Significantly upregulated (Adj-P<0.01)
ENSG00000107731.12_UNC5B	UNC5B	0.450119	1.59724	4.0475	7.8e-05	0.00174245	Significantly upregulated (Adj-P<0.01)
ENSG00000163348.3_PYGO2	PYGO2	-0.184984	3.86132	-4.11515	5.98e-05	0.00146402	Significantly downregulated (Adj-P<0.01)
ENSG00000182670.13_TTC3	TTC3	-0.190339	6.67878	-4.12298	5.8e-05	0.00142863	Significantly downregulated (Adj-P<0.01)
ENSG00000166452.11_AKIP1	AKIP1	-0.158762	3.32569	-4.0994	6.36e-05	0.00153655	Significantly downregulated (Adj-P<0.01)
ENSG00000182218.9_HHIPL1	HHIPL1	0.488021	-0.48382	4.01059	9e-05	0.00192994	Significantly upregulated (Adj-P<0.01)
ENSG00000068697.6_LAPTM4A	LAPTM4A	-0.112893	6.15759	-4.12373	5.78e-05	0.00142863	Significantly downregulated (Adj-P<0.01)
ENSG00000105519.15_CAPS	CAPS	0.238797	2.38338	4.06921	7.16e-05	0.00164869	Significantly upregulated (Adj-P<0.01)
ENSG00000179532.12_DNHD1	DNHD1	0.214498	3.30398	4.09415	6.5e-05	0.00154955	Significantly upregulated (Adj-P<0.01)
ENSG00000139899.10_CBLN3	CBLN3	0.50523	-0.642276	3.99928	9.4e-05	0.00200446	Significantly upregulated (Adj-P<0.01)
ENSG00000131503.20_ANKHD1	ANKHD1	-0.171284	5.90882	-4.11421	6e-05	0.00146517	Significantly downregulated (Adj-P<0.01)
ENSG00000176658.16_MYO1D	MYO1D	0.36849	1.55809	4.02839	8.4e-05	0.00183369	Significantly upregulated (Adj-P<0.01)
ENSG00000177156.10_TALDO1	TALDO1	-0.179367	5.14621	-4.11481	5.99e-05	0.00146402	Significantly downregulated (Adj-P<0.01)
ENSG00000127418.14_FGFRL1	FGFRL1	-0.278535	3.47766	-4.08908	6.63e-05	0.00156988	Significantly downregulated (Adj-P<0.01)
ENSG00000100380.13_ST13	ST13	-0.172829	8.13354	-4.09682	6.43e-05	0.00154039	Significantly downregulated (Adj-P<0.01)
ENSG00000105251.10_SHD	SHD	1.10413	-1.60124	4.0277	8.42e-05	0.00183451	Significantly upregulated (Adj-P<0.01)
ENSG00000121931.15_LRIF1	LRIF1	-0.252732	3.1577	-4.07872	6.9e-05	0.00160724	Significantly downregulated (Adj-P<0.01)
ENSG00000134283.17_PPHLN1	PPHLN1	-0.127238	4.17031	-4.10495	6.23e-05	0.00151478	Significantly downregulated (Adj-P<0.01)
ENSG00000078098.13_FAP	FAP	0.480428	1.96896	4.03753	8.11e-05	0.00178215	Significantly upregulated (Adj-P<0.01)
ENSG00000023697.12_DERA	DERA	0.173163	3.52147	4.08715	6.68e-05	0.00157596	Significantly upregulated (Adj-P<0.01)
ENSG00000055070.16_SZRD1	SZRD1	-0.156494	6.38545	-4.10424	6.24e-05	0.00151478	Significantly downregulated (Adj-P<0.01)
ENSG00000161381.13_PLXDC1	PLXDC1	0.36673	3.49939	4.08284	6.79e-05	0.00159464	Significantly upregulated (Adj-P<0.01)
ENSG00000174903.15_RAB1B	RAB1B	-0.153575	6.96174	-4.09525	6.47e-05	0.00154516	Significantly downregulated (Adj-P<0.01)
ENSG00000118707.9_TGIF2	TGIF2	0.44384	0.201759	3.98604	9.9e-05	0.00207157	Significantly upregulated (Adj-P<0.01)
ENSG00000075292.18_ZNF638	ZNF638	-0.162449	6.05228	-4.09981	6.35e-05	0.0015364	Significantly downregulated (Adj-P<0.01)
ENSG00000279668.2_AC024610.2		-1.11339	0.257908	-3.98581	9.9e-05	0.00207157	Significantly downregulated (Adj-P<0.01)
ENSG00000100982.11_PCIF1	PCIF1	-0.161132	4.96642	-4.09709	6.42e-05	0.00154039	Significantly downregulated (Adj-P<0.01)
ENSG00000079332.14_SAR1A	SAR1A	-0.111285	5.71054	-4.09634	6.44e-05	0.0015409	Significantly downregulated (Adj-P<0.01)
ENSG00000175782.9_SLC35E3	SLC35E3	0.162444	3.5452	4.07371	7.04e-05	0.00162944	Significantly upregulated (Adj-P<0.01)
ENSG00000109270.12_LAMTOR3	LAMTOR3	-0.174639	4.41976	-4.09001	6.6e-05	0.00156782	Significantly downregulated (Adj-P<0.01)
ENSG00000276644.4_DACH1	DACH1	0.412672	1.0264	3.99112	9.7e-05	0.00204997	Significantly upregulated (Adj-P<0.01)
ENSG00000169885.9_CALML6	CALML6	-0.908101	4.8327	-4.0889	6.63e-05	0.00156988	Significantly downregulated (Adj-P<0.01)
ENSG00000133884.9_DPF2	DPF2	-0.121632	4.71302	-4.09099	6.58e-05	0.00156415	Significantly downregulated (Adj-P<0.01)
ENSG00000183688.4_RFLNB	RFLNB	0.297529	3.21792	4.05874	7.46e-05	0.00169278	Significantly upregulated (Adj-P<0.01)
ENSG00000116005.11_PCYOX1	PCYOX1	-0.253874	6.94063	-4.08257	6.8e-05	0.00159464	Significantly downregulated (Adj-P<0.01)
ENSG00000147799.11_ARHGAP39	ARHGAP39	0.500431	0.0933163	3.97011	0.000105216	0.00215021	Significantly upregulated (Adj-P<0.01)
ENSG00000168496.3_FEN1	FEN1	-0.173733	2.98747	-4.0476	7.79e-05	0.00174245	Significantly downregulated (Adj-P<0.01)
ENSG00000213799.12_ZNF845	ZNF845	0.446281	-0.0705645	3.96587	0.000106941	0.00216687	Significantly upregulated (Adj-P<0.01)
ENSG00000159314.11_ARHGAP27	ARHGAP27	0.339417	2.25107	4.02512	8.51e-05	0.00184688	Significantly upregulated (Adj-P<0.01)
ENSG00000135314.12_KHDC1	KHDC1	0.503341	-1.07534	3.98021	0.000101203	0.00210408	Significantly upregulated (Adj-P<0.01)
ENSG00000162383.12_SLC1A7	SLC1A7	0.52892	2.50303	4.03168	8.29e-05	0.00181295	Significantly upregulated (Adj-P<0.01)
ENSG00000168874.12_ATOH8	ATOH8	0.364595	3.63646	4.06494	7.28e-05	0.00166181	Significantly upregulated (Adj-P<0.01)
ENSG00000120616.15_EPC1	EPC1	-0.147715	4.50479	-4.07935	6.88e-05	0.00160604	Significantly downregulated (Adj-P<0.01)
ENSG00000099783.11_HNRNPM	HNRNPM	-0.220996	6.94053	-4.07522	7e-05	0.00162461	Significantly downregulated (Adj-P<0.01)
ENSG00000108344.14_PSMD3	PSMD3	-0.153445	6.6405	-4.07652	6.96e-05	0.00161872	Significantly downregulated (Adj-P<0.01)
ENSG00000123358.19_NR4A1	NR4A1	-0.554999	5.41755	-4.08076	6.85e-05	0.00160153	Significantly downregulated (Adj-P<0.01)
ENSG00000106809.10_OGN	OGN	0.936698	0.920177	3.9758	0.000102936	0.00212883	Significantly upregulated (Adj-P<0.01)
ENSG00000243678.11_NME2	NME2	0.284388	6.38898	4.07483	7.01e-05	0.00162471	Significantly upregulated (Adj-P<0.01)
ENSG00000198435.3_NRARP	NRARP	0.541383	-0.157839	3.95634	0.000110925	0.00222091	Significantly upregulated (Adj-P<0.01)
ENSG00000162639.15_HENMT1	HENMT1	0.414568	0.651936	3.97008	0.000105225	0.00215021	Significantly upregulated (Adj-P<0.01)
ENSG00000154845.15_PPP4R1	PPP4R1	0.151625	3.93543	4.06558	7.27e-05	0.00166011	Significantly upregulated (Adj-P<0.01)
ENSG00000232434.2_AJM1	AJM1	0.332707	2.35252	4.02066	8.66e-05	0.0018662	Significantly upregulated (Adj-P<0.01)
ENSG00000066056.13_TIE1	TIE1	0.312226	3.67125	4.05698	7.51e-05	0.00169881	Significantly upregulated (Adj-P<0.01)
ENSG00000171097.13_KYAT1	KYAT1	-0.209349	2.59938	-4.0214	8.63e-05	0.00186342	Significantly downregulated (Adj-P<0.01)
ENSG00000198715.12_GLMP	GLMP	0.284297	1.57407	3.98931	9.77e-05	0.00205885	Significantly upregulated (Adj-P<0.01)
ENSG00000136026.13_CKAP4	CKAP4	0.202771	3.15755	4.0374	8.11e-05	0.00178215	Significantly upregulated (Adj-P<0.01)
ENSG00000172331.11_BPGM	BPGM	-0.255589	3.85784	-4.05675	7.52e-05	0.00169881	Significantly downregulated (Adj-P<0.01)
ENSG00000143149.12_ALDH9A1	ALDH9A1	-0.166798	6.10275	-4.06789	7.2e-05	0.00164997	Significantly downregulated (Adj-P<0.01)
ENSG00000169515.6_CCDC8	CCDC8	0.546543	1.28746	3.97614	0.0001028	0.00212883	Significantly upregulated (Adj-P<0.01)
ENSG00000169564.6_PCBP1	PCBP1	-0.144876	8.41765	-4.04754	7.8e-05	0.00174245	Significantly downregulated (Adj-P<0.01)
ENSG00000156463.17_SH3RF2	SH3RF2	-0.553782	4.85877	-4.06652	7.24e-05	0.00165638	Significantly downregulated (Adj-P<0.01)
ENSG00000179639.10_FCER1A	FCER1A	0.990522	-1.80264	3.99039	9.73e-05	0.00205299	Significantly upregulated (Adj-P<0.01)
ENSG00000188171.15_ZNF626	ZNF626	-0.298209	1.60359	-3.97459	0.000103418	0.00213038	Significantly downregulated (Adj-P<0.01)
ENSG00000162881.6_OXER1	OXER1	0.628461	-1.40295	3.95462	0.00011166	0.00223277	Significantly upregulated (Adj-P<0.01)
ENSG00000157368.10_IL34	IL34	0.445919	0.273454	3.94585	0.000115476	0.0022829	Significantly upregulated (Adj-P<0.01)
ENSG00000109113.19_RAB34	RAB34	0.351364	1.61105	3.97767	0.000102198	0.00212197	Significantly upregulated (Adj-P<0.01)
ENSG00000273599.1_AL731571.1		0.333115	1.28606	3.96543	0.000107122	0.00216687	Significantly upregulated (Adj-P<0.01)
ENSG00000149357.9_LAMTOR1	LAMTOR1	-0.153729	5.07164	-4.0589	7.46e-05	0.00169278	Significantly downregulated (Adj-P<0.01)
ENSG00000130764.9_LRRC47	LRRC47	-0.132546	6.603	-4.05372	7.61e-05	0.00171389	Significantly downregulated (Adj-P<0.01)
ENSG00000100104.13_SRRD	SRRD	-0.174949	4.76455	-4.05672	7.52e-05	0.00169881	Significantly downregulated (Adj-P<0.01)
ENSG00000136114.16_THSD1	THSD1	0.256408	1.68955	3.97583	0.000102924	0.00212883	Significantly upregulated (Adj-P<0.01)
ENSG00000021300.13_PLEKHB1	PLEKHB1	0.335871	2.27975	3.99186	9.68e-05	0.00204966	Significantly upregulated (Adj-P<0.01)
ENSG00000156049.6_GNA14	GNA14	0.553586	-1.01213	3.9373	0.000119315	0.00233819	Significantly upregulated (Adj-P<0.01)
ENSG00000160360.12_GPSM1	GPSM1	0.405666	0.569707	3.94181	0.000117275	0.00230396	Significantly upregulated (Adj-P<0.01)
ENSG00000108786.10_HSD17B1	HSD17B1	0.290523	1.43048	3.96317	0.000108056	0.00217736	Significantly upregulated (Adj-P<0.01)
ENSG00000177981.10_ASB8	ASB8	-0.18105	7.33453	-4.03922	8.05e-05	0.00177647	Significantly downregulated (Adj-P<0.01)
ENSG00000119318.12_RAD23B	RAD23B	-0.149973	7.61736	-4.03474	8.19e-05	0.00179396	Significantly downregulated (Adj-P<0.01)
ENSG00000111252.10_SH2B3	SH2B3	0.344192	3.49651	4.02308	8.57e-05	0.00185643	Significantly upregulated (Adj-P<0.01)
ENSG00000010404.17_IDS	IDS	-0.139406	5.71472	-4.046	7.84e-05	0.00174348	Significantly downregulated (Adj-P<0.01)
ENSG00000100242.15_SUN2	SUN2	-0.248378	6.22264	-4.04298	7.94e-05	0.00175941	Significantly downregulated (Adj-P<0.01)
ENSG00000135931.17_ARMC9	ARMC9	0.557087	-0.871049	3.93004	0.000122669	0.00239197	Significantly upregulated (Adj-P<0.01)
ENSG00000105810.9_CDK6	CDK6	0.396522	2.0473	3.97104	0.000104837	0.00215021	Significantly upregulated (Adj-P<0.01)
ENSG00000161999.11_JMJD8	JMJD8	0.214859	3.67637	4.02398	8.54e-05	0.00185251	Significantly upregulated (Adj-P<0.01)
ENSG00000203808.11_BVES-AS1	BVES-AS1	-0.245916	1.97756	-3.96505	0.000107278	0.00216724	Significantly downregulated (Adj-P<0.01)
ENSG00000108387.14_SEPT4	SEPT4	0.2688	2.01082	3.9669	0.000106522	0.00216687	Significantly upregulated (Adj-P<0.01)
ENSG00000128266.8_GNAZ	GNAZ	0.344137	0.356857	3.91798	0.000128439	0.00247485	Significantly upregulated (Adj-P<0.01)
ENSG00000179776.18_CDH5	CDH5	0.337641	5.00531	4.03557	8.17e-05	0.00179067	Significantly upregulated (Adj-P<0.01)
ENSG00000138160.5_KIF11	KIF11	0.570548	-1.31133	3.93296	0.000121307	0.00237131	Significantly upregulated (Adj-P<0.01)
ENSG00000187605.15_TET3	TET3	0.250789	1.85983	3.95876	0.000109902	0.00220324	Significantly upregulated (Adj-P<0.01)
ENSG00000085231.13_AK6	AK6	-0.148369	3.91167	-4.0197	8.69e-05	0.00187062	Significantly downregulated (Adj-P<0.01)
ENSG00000159352.15_PSMD4	PSMD4	-0.152413	6.7216	-4.02728	8.44e-05	0.00183451	Significantly downregulated (Adj-P<0.01)
ENSG00000188130.13_MAPK12	MAPK12	-0.234573	7.50675	-4.01933	8.7e-05	0.00187075	Significantly downregulated (Adj-P<0.01)
ENSG00000034971.16_MYOC	MYOC	-0.618225	3.7645	-4.00993	9.02e-05	0.00193224	Significantly downregulated (Adj-P<0.01)
ENSG00000131389.17_SLC6A6	SLC6A6	-0.358866	4.86878	-4.02721	8.44e-05	0.00183451	Significantly downregulated (Adj-P<0.01)
ENSG00000143147.14_GPR161	GPR161	0.338648	0.770679	3.91702	0.000128907	0.00247668	Significantly upregulated (Adj-P<0.01)
ENSG00000185340.15_GAS2L1	GAS2L1	0.315152	2.20911	3.96179	0.000108629	0.0021861	Significantly upregulated (Adj-P<0.01)
ENSG00000136450.12_SRSF1	SRSF1	-0.147234	5.86654	-4.02204	8.61e-05	0.00186134	Significantly downregulated (Adj-P<0.01)
ENSG00000196754.10_S100A2	S100A2	1.09788	-2.59972	3.96657	0.000106654	0.00216687	Significantly upregulated (Adj-P<0.01)
ENSG00000163584.17_RPL22L1	RPL22L1	0.321694	0.697258	3.90555	0.000134656	0.00256828	Significantly upregulated (Adj-P<0.01)
ENSG00000120820.12_GLT8D2	GLT8D2	0.400832	0.633284	3.9033	0.000135812	0.0025778	Significantly upregulated (Adj-P<0.01)
ENSG00000168216.11_LMBRD1	LMBRD1	-0.17187	4.92618	-4.01694	8.78e-05	0.00188561	Significantly downregulated (Adj-P<0.01)
ENSG00000267796.7_LIN37	LIN37	-0.249147	2.0821	-3.94372	0.000116418	0.00229211	Significantly downregulated (Adj-P<0.01)
ENSG00000213064.9_SFT2D2	SFT2D2	0.213273	3.66069	3.99645	9.51e-05	0.00201909	Significantly upregulated (Adj-P<0.01)
ENSG00000166317.11_SYNPO2L	SYNPO2L	-0.208018	8.47499	-3.99139	9.69e-05	0.00204997	Significantly downregulated (Adj-P<0.01)
ENSG00000158555.14_GDPD5	GDPD5	0.279429	2.93128	3.97462	0.000103405	0.00213038	Significantly upregulated (Adj-P<0.01)
ENSG00000104879.4_CKM	CKM	-0.253385	14.4709	-3.92539	0.000124861	0.00242185	Significantly downregulated (Adj-P<0.01)
ENSG00000102710.19_SUPT20H	SUPT20H	-0.170355	3.94879	-3.99869	9.42e-05	0.00200446	Significantly downregulated (Adj-P<0.01)
ENSG00000087448.10_KLHL42	KLHL42	0.248295	2.1261	3.93968	0.000118232	0.00231985	Significantly upregulated (Adj-P<0.01)
ENSG00000058729.10_RIOK2	RIOK2	-0.177162	3.63296	-3.98833	9.81e-05	0.00206384	Significantly downregulated (Adj-P<0.01)
ENSG00000243725.6_TTC4	TTC4	-0.180389	4.49918	-4.00596	9.16e-05	0.00195683	Significantly downregulated (Adj-P<0.01)
ENSG00000088882.7_CPXM1	CPXM1	1.37139	-2.21906	3.92516	0.000124973	0.00242185	Significantly upregulated (Adj-P<0.01)
ENSG00000147119.3_CHST7	CHST7	0.352697	0.844352	3.89989	0.000137578	0.00260817	Significantly upregulated (Adj-P<0.01)
ENSG00000118600.11_RXYLT1	RXYLT1	0.185468	2.83289	3.96576	0.000106986	0.00216687	Significantly upregulated (Adj-P<0.01)
ENSG00000103264.17_FBXO31	FBXO31	-0.181614	6.23509	-4.00668	9.14e-05	0.001954	Significantly downregulated (Adj-P<0.01)
ENSG00000176907.4_TCIM	TCIM	0.367253	2.31544	3.94412	0.000116243	0.00229211	Significantly upregulated (Adj-P<0.01)
ENSG00000062524.15_LTK	LTK	1.34479	-2.00556	3.91901	0.000127937	0.00247318	Significantly upregulated (Adj-P<0.01)
ENSG00000112186.11_CAP2	CAP2	-0.201071	8.63436	-3.98349	9.99e-05	0.00208046	Significantly downregulated (Adj-P<0.01)
ENSG00000169604.19_ANTXR1	ANTXR1	0.384999	3.60078	3.98514	9.93e-05	0.00207272	Significantly upregulated (Adj-P<0.01)
ENSG00000143554.13_SLC27A3	SLC27A3	0.314969	2.26656	3.94348	0.000116526	0.00229211	Significantly upregulated (Adj-P<0.01)
ENSG00000156050.8_FAM161B	FAM161B	-0.158078	3.10627	-3.9661	0.000106848	0.00216687	Significantly downregulated (Adj-P<0.01)
ENSG00000181588.16_MEX3D	MEX3D	0.402396	0.830138	3.89412	0.000140623	0.00265627	Significantly upregulated (Adj-P<0.01)
ENSG00000126458.3_RRAS	RRAS	0.33866	3.76951	3.98563	9.91e-05	0.00207157	Significantly upregulated (Adj-P<0.01)
ENSG00000103966.10_EHD4	EHD4	0.384374	2.59905	3.94737	0.000114804	0.00228168	Significantly upregulated (Adj-P<0.01)
ENSG00000100307.12_CBX7	CBX7	-0.190455	6.58355	-3.99314	9.63e-05	0.00204235	Significantly downregulated (Adj-P<0.01)
ENSG00000136986.9_DERL1	DERL1	-0.283124	5.49787	-3.999	9.41e-05	0.00200446	Significantly downregulated (Adj-P<0.01)
ENSG00000105173.13_CCNE1	CCNE1	0.522496	-1.04196	3.87986	0.000148424	0.00276699	Significantly upregulated (Adj-P<0.01)
ENSG00000204219.10_TCEA3	TCEA3	-0.178956	8.16151	-3.97064	0.000105001	0.00215021	Significantly downregulated (Adj-P<0.01)
ENSG00000156239.11_N6AMT1	N6AMT1	-0.167526	3.34339	-3.95897	0.000109813	0.00220324	Significantly downregulated (Adj-P<0.01)
ENSG00000107937.18_GTPBP4	GTPBP4	-0.124091	4.86117	-3.98779	9.83e-05	0.00206539	Significantly downregulated (Adj-P<0.01)
ENSG00000204791.10_SMPD5	SMPD5	0.711924	-2.01144	3.88035	0.000148143	0.00276505	Significantly upregulated (Adj-P<0.01)
ENSG00000169105.7_CHST14	CHST14	0.235756	1.46181	3.89375	0.00014082	0.0026568	Significantly upregulated (Adj-P<0.01)
ENSG00000189077.10_TMEM120A	TMEM120A	-0.375359	4.91426	-3.98573	9.91e-05	0.00207157	Significantly downregulated (Adj-P<0.01)
ENSG00000185627.17_PSMD13	PSMD13	-0.132228	6.05561	-3.9841	9.97e-05	0.00207829	Significantly downregulated (Adj-P<0.01)
ENSG00000102743.14_SLC25A15	SLC25A15	0.34502	1.17835	3.88168	0.000147404	0.00275716	Significantly upregulated (Adj-P<0.01)
ENSG00000204103.3_MAFB	MAFB	-0.447941	4.25962	-3.97341	0.000103887	0.00213666	Significantly downregulated (Adj-P<0.01)
ENSG00000196357.11_ZNF565	ZNF565	-0.203803	1.4504	-3.88143	0.000147545	0.00275716	Significantly downregulated (Adj-P<0.01)
ENSG00000272734.1_ADIRF-AS1	ADIRF-AS1	0.365321	3.3425	3.95332	0.000112218	0.00224107	Significantly upregulated (Adj-P<0.01)
ENSG00000099942.12_CRKL	CRKL	-0.155154	6.5308	-3.97477	0.000103347	0.00213038	Significantly downregulated (Adj-P<0.01)
ENSG00000175274.18_TP53I11	TP53I11	0.337723	2.61553	3.92812	0.00012357	0.00240356	Significantly upregulated (Adj-P<0.01)
ENSG00000121058.4_COIL	COIL	-0.152814	3.32395	-3.94632	0.000115268	0.00228168	Significantly downregulated (Adj-P<0.01)
ENSG00000005108.15_THSD7A	THSD7A	0.493981	-0.702483	3.85329	0.000164057	0.00296341	Significantly upregulated (Adj-P<0.01)
ENSG00000177542.10_SLC25A22	SLC25A22	0.466433	-0.409482	3.84701	0.000167978	0.00300116	Significantly upregulated (Adj-P<0.01)
ENSG00000141198.15_TOM1L1	TOM1L1	0.44898	-0.281568	3.84565	0.000168841	0.0030059	Significantly upregulated (Adj-P<0.01)
ENSG00000126778.9_SIX1	SIX1	-0.23991	6.7989	-3.9698	0.000105339	0.00215021	Significantly downregulated (Adj-P<0.01)
ENSG00000103855.17_CD276	CD276	0.288311	2.44493	3.91787	0.000128492	0.00247485	Significantly upregulated (Adj-P<0.01)
ENSG00000113721.13_PDGFRB	PDGFRB	0.286015	5.17521	3.97314	0.000103995	0.00213666	Significantly upregulated (Adj-P<0.01)
ENSG00000203727.3_SAMD5	SAMD5	0.712379	-1.47343	3.86358	0.000157829	0.00288746	Significantly upregulated (Adj-P<0.01)
ENSG00000100139.13_MICALL1	MICALL1	0.191286	3.53647	3.94902	0.000114082	0.0022754	Significantly upregulated (Adj-P<0.01)
ENSG00000181019.12_NQO1	NQO1	0.435512	2.55739	3.9151	0.000129854	0.00248575	Significantly upregulated (Adj-P<0.01)
ENSG00000088727.12_KIF9	KIF9	0.339062	0.522803	3.84813	0.000167275	0.0029974	Significantly upregulated (Adj-P<0.01)
ENSG00000180228.12_PRKRA	PRKRA	-0.143327	5.75217	-3.96562	0.000107045	0.00216687	Significantly downregulated (Adj-P<0.01)
ENSG00000158710.14_TAGLN2	TAGLN2	0.311684	4.66992	3.9611	0.000108918	0.0021891	Significantly upregulated (Adj-P<0.01)
ENSG00000138190.16_EXOC6	EXOC6	-0.228158	5.27076	-3.964	0.000107713	0.00217322	Significantly downregulated (Adj-P<0.01)
ENSG00000238164.6_TNFRSF14-AS1	TNFRSF14-AS1	0.389366	0.512444	3.84493	0.000169293	0.00300944	Significantly upregulated (Adj-P<0.01)
ENSG00000068903.19_SIRT2	SIRT2	-0.165157	7.58393	-3.94661	0.000115141	0.00228168	Significantly downregulated (Adj-P<0.01)
ENSG00000170325.14_PRDM10	PRDM10	-0.292805	3.83698	-3.94439	0.000116121	0.00229211	Significantly downregulated (Adj-P<0.01)
ENSG00000114923.16_SLC4A3	SLC4A3	0.452875	0.00946264	3.83003	0.000179021	0.00313276	Significantly upregulated (Adj-P<0.01)
ENSG00000279145.2_AC011912.1		-0.535545	-0.297319	-3.82636	0.000181501	0.00315594	Significantly downregulated (Adj-P<0.01)
ENSG00000235257.8_ITGA9-AS1	ITGA9-AS1	0.570008	-1.43493	3.84033	0.000172244	0.00304129	Significantly upregulated (Adj-P<0.01)
ENSG00000189316.3_AC073349.1		-0.706088	1.35333	-3.8663	0.000156214	0.00287803	Significantly downregulated (Adj-P<0.01)
ENSG00000196576.14_PLXNB2	PLXNB2	0.370488	3.61969	3.93441	0.00012064	0.0023612	Significantly upregulated (Adj-P<0.01)
ENSG00000184445.11_KNTC1	KNTC1	0.271667	1.45308	3.85898	0.000160585	0.00291964	Significantly upregulated (Adj-P<0.01)
ENSG00000230630.5_DNM3OS	DNM3OS	0.386971	1.02948	3.84331	0.00017033	0.00301429	Significantly upregulated (Adj-P<0.01)
ENSG00000149639.14_SOGA1	SOGA1	0.290407	3.44306	3.92933	0.000122998	0.00239541	Significantly upregulated (Adj-P<0.01)
ENSG00000080371.5_RAB21	RAB21	-0.168895	6.58478	-3.94815	0.000114463	0.0022801	Significantly downregulated (Adj-P<0.01)
ENSG00000196730.12_DAPK1	DAPK1	0.375973	1.74807	3.86702	0.000155791	0.00287362	Significantly upregulated (Adj-P<0.01)
ENSG00000012061.15_ERCC1	ERCC1	0.160427	4.7653	3.94691	0.000115009	0.00228168	Significantly upregulated (Adj-P<0.01)
ENSG00000138316.10_ADAMTS14	ADAMTS14	0.8364	-1.9444	3.84396	0.000169912	0.00301028	Significantly upregulated (Adj-P<0.01)
ENSG00000117122.13_MFAP2	MFAP2	0.67558	-1.04848	3.8171	0.000187888	0.00324097	Significantly upregulated (Adj-P<0.01)
ENSG00000107736.20_CDH23	CDH23	0.366791	2.78548	3.90332	0.000135797	0.0025778	Significantly upregulated (Adj-P<0.01)
ENSG00000165006.13_UBAP1	UBAP1	-0.131659	5.52836	-3.94655	0.000115164	0.00228168	Significantly downregulated (Adj-P<0.01)
ENSG00000085741.12_WNT11	WNT11	0.306019	2.567	3.88813	0.000143849	0.00270419	Significantly upregulated (Adj-P<0.01)
ENSG00000221926.12_TRIM16	TRIM16	0.228786	3.46551	3.91174	0.000131524	0.00251465	Significantly upregulated (Adj-P<0.01)
ENSG00000114346.13_ECT2	ECT2	0.313752	0.587589	3.81414	0.000189977	0.00326982	Significantly upregulated (Adj-P<0.01)
ENSG00000132122.11_SPATA6	SPATA6	0.329459	0.397471	3.80765	0.000194636	0.00331583	Significantly upregulated (Adj-P<0.01)
ENSG00000112855.15_HARS2	HARS2	-0.13713	4.66378	-3.93235	0.000121592	0.00237392	Significantly downregulated (Adj-P<0.01)
ENSG00000138131.3_LOXL4	LOXL4	-0.48131	2.44098	-3.86429	0.000157404	0.00288746	Significantly downregulated (Adj-P<0.01)
ENSG00000187688.14_TRPV2	TRPV2	0.382653	1.01952	3.81827	0.000187069	0.00323039	Significantly upregulated (Adj-P<0.01)
ENSG00000089006.16_SNX5	SNX5	-0.146516	5.63708	-3.92737	0.000123923	0.00240744	Significantly downregulated (Adj-P<0.01)
ENSG00000004399.12_PLXND1	PLXND1	0.286846	4.64893	3.92359	0.000125722	0.00243337	Significantly upregulated (Adj-P<0.01)
ENSG00000259495.2_AC016705.2		-0.443045	0.838905	-3.8049	0.000196641	0.00333695	Significantly downregulated (Adj-P<0.01)
ENSG00000240857.1_RDH14	RDH14	-0.14673	4.34403	-3.91755	0.00012865	0.00247485	Significantly downregulated (Adj-P<0.01)
ENSG00000117600.12_PLPPR4	PLPPR4	0.704432	-0.729341	3.7899	0.000207922	0.00347104	Significantly upregulated (Adj-P<0.01)
ENSG00000160410.14_SHKBP1	SHKBP1	0.313964	1.85556	3.83955	0.000172747	0.00304675	Significantly upregulated (Adj-P<0.01)
ENSG00000258839.3_MC1R	MC1R	0.404365	0.0712287	3.78762	0.00020969	0.00349417	Significantly upregulated (Adj-P<0.01)
ENSG00000149743.13_TRPT1	TRPT1	0.300101	5.08426	3.91754	0.000128654	0.00247485	Significantly upregulated (Adj-P<0.01)
ENSG00000009709.11_PAX7	PAX7	0.35809	2.74308	3.87212	0.000152822	0.00283552	Significantly upregulated (Adj-P<0.01)
ENSG00000174705.12_SH3PXD2B	SH3PXD2B	0.442035	1.59137	3.82421	0.000182963	0.00317697	Significantly upregulated (Adj-P<0.01)
ENSG00000101104.12_PABPC1L	PABPC1L	0.390118	-0.0364438	3.78151	0.000214501	0.00355742	Significantly upregulated (Adj-P<0.01)
ENSG00000250041.2_AC069360.1		-0.201302	3.15245	-3.88252	0.000146937	0.00275235	Significantly downregulated (Adj-P<0.01)
ENSG00000257815.5_LINC01481	LINC01481	0.524715	-1.38676	3.79389	0.000204865	0.00343932	Significantly upregulated (Adj-P<0.01)
ENSG00000167733.13_HSD11B1L	HSD11B1L	0.28983	2.35351	3.85878	0.000160704	0.00291964	Significantly upregulated (Adj-P<0.01)
ENSG00000261371.5_PECAM1	PECAM1	0.349762	5.30812	3.91587	0.000129475	0.00248456	Significantly upregulated (Adj-P<0.01)
ENSG00000214872.8_SMTNL1	SMTNL1	-0.381293	8.1436	-3.89582	0.000139717	0.00264234	Significantly downregulated (Adj-P<0.01)
ENSG00000137876.9_RSL24D1	RSL24D1	-0.135588	5.4805	-3.91523	0.000129789	0.00248575	Significantly downregulated (Adj-P<0.01)
ENSG00000165804.15_ZNF219	ZNF219	-0.256656	4.22922	-3.90375	0.000135576	0.0025778	Significantly downregulated (Adj-P<0.01)
ENSG00000188716.5_DUPD1	DUPD1	-0.240722	3.67202	-3.89156	0.000141993	0.00267571	Significantly downregulated (Adj-P<0.01)
ENSG00000249751.3_ECSCR	ECSCR	0.285713	1.74894	3.82628	0.000181552	0.00315594	Significantly upregulated (Adj-P<0.01)
ENSG00000214753.3_HNRNPUL2	HNRNPUL2	-0.147584	6.44021	-3.90581	0.000134521	0.00256828	Significantly downregulated (Adj-P<0.01)
ENSG00000106263.17_EIF3B	EIF3B	-0.148026	6.53537	-3.90462	0.000135128	0.00257416	Significantly downregulated (Adj-P<0.01)
ENSG00000203799.12_CCDC162P	CCDC162P	0.406346	0.321215	3.78025	0.000215509	0.0035684	Significantly upregulated (Adj-P<0.01)
ENSG00000174951.11_FUT1	FUT1	0.377391	0.559011	3.78573	0.00021117	0.00351311	Significantly upregulated (Adj-P<0.01)
ENSG00000166794.4_PPIB	PPIB	0.2958	3.45809	3.87907	0.000148864	0.00277192	Significantly upregulated (Adj-P<0.01)
ENSG00000102890.14_ELMO3	ELMO3	0.477716	-0.868955	3.76839	0.000225185	0.00369356	Significantly upregulated (Adj-P<0.01)
ENSG00000171385.9_KCND3	KCND3	-0.433234	3.02053	-3.85598	0.000162405	0.00294034	Significantly downregulated (Adj-P<0.01)
ENSG00000105329.9_TGFB1	TGFB1	0.410295	2.08206	3.82895	0.000179748	0.00313898	Significantly upregulated (Adj-P<0.01)
ENSG00000189134.3_NKAPL	NKAPL	-0.226981	1.78689	-3.80546	0.000196226	0.00333351	Significantly downregulated (Adj-P<0.01)
ENSG00000136888.6_ATP6V1G1	ATP6V1G1	-0.139714	5.37316	-3.8988	0.00013815	0.00261585	Significantly downregulated (Adj-P<0.01)
ENSG00000276231.4_PIK3R6	PIK3R6	0.616583	-1.36328	3.77365	0.000220838	0.00363597	Significantly upregulated (Adj-P<0.01)
ENSG00000138698.14_RAP1GDS1	RAP1GDS1	0.255432	1.51935	3.79841	0.000201448	0.00340013	Significantly upregulated (Adj-P<0.01)
ENSG00000175662.17_TOM1L2	TOM1L2	-0.145968	6.58356	-3.88768	0.000144096	0.0027056	Significantly downregulated (Adj-P<0.01)
ENSG00000166073.10_GPR176	GPR176	0.515825	-0.00616995	3.75428	0.000237232	0.00381931	Significantly upregulated (Adj-P<0.01)
ENSG00000050405.13_LIMA1	LIMA1	0.241084	4.89134	3.88866	0.00014356	0.002702	Significantly upregulated (Adj-P<0.01)
ENSG00000106772.17_PRUNE2	PRUNE2	0.817989	2.12249	3.81949	0.000186222	0.0032193	Significantly upregulated (Adj-P<0.01)
ENSG00000145911.5_N4BP3	N4BP3	0.228646	2.948	3.84688	0.000168059	0.00300116	Significantly upregulated (Adj-P<0.01)
ENSG00000085063.15_CD59	CD59	-0.127295	8.31835	-3.86423	0.000157437	0.00288746	Significantly downregulated (Adj-P<0.01)
ENSG00000120129.5_DUSP1	DUSP1	-0.442426	5.70291	-3.88421	0.000146	0.00273807	Significantly downregulated (Adj-P<0.01)
ENSG00000138594.13_TMOD3	TMOD3	0.254921	3.06392	3.8442	0.00016976	0.00301028	Significantly upregulated (Adj-P<0.01)
ENSG00000117751.17_PPP1R8	PPP1R8	-0.100416	3.99105	-3.87052	0.000153747	0.00284932	Significantly downregulated (Adj-P<0.01)
ENSG00000270959.1_LPP-AS2	LPP-AS2	0.352041	0.103609	3.74693	0.000243746	0.00389622	Significantly upregulated (Adj-P<0.01)
ENSG00000110274.15_CEP164	CEP164	0.214445	2.3871	3.82132	0.000184953	0.00320792	Significantly upregulated (Adj-P<0.01)
ENSG00000103319.11_EEF2K	EEF2K	-0.215491	6.53161	-3.87684	0.000150125	0.00279208	Significantly downregulated (Adj-P<0.01)
ENSG00000146242.8_TPBG	TPBG	0.37287	0.826809	3.76337	0.000229401	0.00373926	Significantly upregulated (Adj-P<0.01)
ENSG00000060642.10_PIGV	PIGV	-0.215174	1.62621	-3.78559	0.000211275	0.00351311	Significantly downregulated (Adj-P<0.01)
ENSG00000183935.5_HTR7P1	HTR7P1	0.504891	-0.831579	3.74257	0.00024769	0.00393729	Significantly upregulated (Adj-P<0.01)
ENSG00000136840.18_ST6GALNAC4	ST6GALNAC4	0.359856	3.2711	3.84905	0.000166693	0.00299379	Significantly upregulated (Adj-P<0.01)
ENSG00000164778.4_EN2	EN2	0.923547	-1.87939	3.76806	0.000225461	0.00369422	Significantly upregulated (Adj-P<0.01)
ENSG00000100714.15_MTHFD1	MTHFD1	-0.158978	6.04424	-3.87366	0.00015194	0.00282249	Significantly downregulated (Adj-P<0.01)
ENSG00000144712.12_CAND2	CAND2	-0.20693	7.3541	-3.86264	0.000158385	0.00289427	Significantly downregulated (Adj-P<0.01)
ENSG00000162086.14_ZNF75A	ZNF75A	-0.173415	3.10548	-3.83438	0.000176129	0.00309944	Significantly downregulated (Adj-P<0.01)
ENSG00000135744.7_AGT	AGT	-0.269532	4.29035	-3.86469	0.00015717	0.00288746	Significantly downregulated (Adj-P<0.01)
ENSG00000120029.12_ARMH3	ARMH3	-0.189613	4.71855	-3.86704	0.000155779	0.00287362	Significantly downregulated (Adj-P<0.01)
ENSG00000106588.10_PSMA2	PSMA2	-0.128289	5.68832	-3.86859	0.000154874	0.00286682	Significantly downregulated (Adj-P<0.01)
ENSG00000185651.14_UBE2L3	UBE2L3	-0.0950995	5.54826	-3.8679	0.000155275	0.00287085	Significantly downregulated (Adj-P<0.01)
ENSG00000257702.3_LBX2-AS1	LBX2-AS1	0.531937	-0.908018	3.72755	0.000261752	0.00410052	Significantly upregulated (Adj-P<0.01)
ENSG00000115295.19_CLIP4	CLIP4	-0.229177	6.18884	-3.86386	0.000157658	0.00288746	Significantly downregulated (Adj-P<0.01)
ENSG00000067334.13_DNTTIP2	DNTTIP2	-0.143116	4.82583	-3.86387	0.000157651	0.00288746	Significantly downregulated (Adj-P<0.01)
ENSG00000176871.8_WSB2	WSB2	0.165812	6.194	3.86167	0.000158969	0.00290155	Significantly upregulated (Adj-P<0.01)
ENSG00000185989.10_RASA3	RASA3	-0.189781	4.38263	-3.85832	0.000160982	0.0029213	Significantly downregulated (Adj-P<0.01)
ENSG00000184113.9_CLDN5	CLDN5	0.368698	3.81155	3.84825	0.000167195	0.0029974	Significantly upregulated (Adj-P<0.01)
ENSG00000225138.7_SLC9A3-AS1	SLC9A3-AS1	0.606512	1.74714	3.77542	0.0002194	0.00361756	Significantly upregulated (Adj-P<0.01)
ENSG00000139329.4_LUM	LUM	0.602279	4.09509	3.8515	0.000165167	0.00298003	Significantly upregulated (Adj-P<0.01)
ENSG00000155265.10_GOLGA7B	GOLGA7B	-0.446202	2.60839	-3.80265	0.000198291	0.00335045	Significantly downregulated (Adj-P<0.01)
ENSG00000164609.9_SLU7	SLU7	-0.135035	5.2527	-3.86108	0.00015932	0.00290458	Significantly downregulated (Adj-P<0.01)
ENSG00000148985.19_PGAP2	PGAP2	0.171619	2.74839	3.81256	0.000191104	0.00328202	Significantly upregulated (Adj-P<0.01)
ENSG00000214097.4_SMCO1	SMCO1	-0.314316	6.37636	-3.85669	0.000161974	0.00293592	Significantly downregulated (Adj-P<0.01)
ENSG00000129691.15_ASH2L	ASH2L	-0.0933205	4.92554	-3.85898	0.000160582	0.00291964	Significantly downregulated (Adj-P<0.01)
ENSG00000164089.8_ETNPPL	ETNPPL	0.795793	-0.943408	3.71838	0.000270693	0.00420699	Significantly upregulated (Adj-P<0.01)
ENSG00000106003.12_LFNG	LFNG	0.513974	0.970404	3.74522	0.000245283	0.00391679	Significantly upregulated (Adj-P<0.01)
ENSG00000163453.11_IGFBP7	IGFBP7	0.331388	5.97699	3.85395	0.00016365	0.00295947	Significantly upregulated (Adj-P<0.01)
ENSG00000108433.16_GOSR2	GOSR2	-0.10203	4.20453	-3.84631	0.000168422	0.00300423	Significantly downregulated (Adj-P<0.01)
ENSG00000163431.12_LMOD1	LMOD1	-0.393562	6.50193	-3.8494	0.000166475	0.00299379	Significantly downregulated (Adj-P<0.01)
ENSG00000133104.13_SPART	SPART	-0.160412	4.65232	-3.84933	0.000166518	0.00299379	Significantly downregulated (Adj-P<0.01)
ENSG00000165192.13_ASB11	ASB11	-0.268318	6.36772	-3.84967	0.000166308	0.00299379	Significantly downregulated (Adj-P<0.01)
ENSG00000213762.11_ZNF134	ZNF134	-0.208205	3.44882	-3.82103	0.000185155	0.00320792	Significantly downregulated (Adj-P<0.01)
ENSG00000119711.12_ALDH6A1	ALDH6A1	-0.398362	5.76094	-3.84761	0.000167601	0.0029998	Significantly downregulated (Adj-P<0.01)
ENSG00000130592.15_LSP1	LSP1	0.324445	4.19251	3.83845	0.000173464	0.00305596	Significantly upregulated (Adj-P<0.01)
ENSG00000117020.16_AKT3	AKT3	0.249835	3.14073	3.8103	0.000192717	0.00330354	Significantly upregulated (Adj-P<0.01)
ENSG00000162735.18_PEX19	PEX19	-0.110492	5.933	-3.84464	0.000169481	0.00300944	Significantly downregulated (Adj-P<0.01)
ENSG00000198843.12_SELENOT	SELENOT	-0.15975	5.01103	-3.84556	0.000168899	0.0030059	Significantly downregulated (Adj-P<0.01)
ENSG00000135862.5_LAMC1	LAMC1	0.210023	6.35824	3.84164	0.0001714	0.0030298	Significantly upregulated (Adj-P<0.01)
ENSG00000187650.3_VMAC	VMAC	0.261247	1.10564	3.73665	0.000253143	0.00399757	Significantly upregulated (Adj-P<0.01)
ENSG00000196236.12_XPNPEP3	XPNPEP3	-0.170471	4.03977	-3.83204	0.000177682	0.0031182	Significantly downregulated (Adj-P<0.01)
ENSG00000182796.14_TMEM198B	TMEM198B	0.241058	2.18474	3.77794	0.000217355	0.0035914	Significantly upregulated (Adj-P<0.01)
ENSG00000172687.13_ZNF738	ZNF738	0.458614	-0.235871	3.69993	0.000289588	0.0043962	Significantly upregulated (Adj-P<0.01)
ENSG00000179630.10_LACC1	LACC1	0.456519	0.298911	3.70645	0.000282777	0.00432628	Significantly upregulated (Adj-P<0.01)
ENSG00000104369.4_JPH1	JPH1	-0.251244	8.40462	-3.81966	0.000186102	0.0032193	Significantly downregulated (Adj-P<0.01)
ENSG00000136059.14_VILL	VILL	0.30645	0.275402	3.70906	0.000280093	0.00430179	Significantly upregulated (Adj-P<0.01)
ENSG00000187607.15_ZNF286A	ZNF286A	0.294667	1.05856	3.7256	0.000263631	0.00411956	Significantly upregulated (Adj-P<0.01)
ENSG00000106366.8_SERPINE1	SERPINE1	0.77323	0.190337	3.70066	0.000288819	0.00438877	Significantly upregulated (Adj-P<0.01)
ENSG00000111145.7_ELK3	ELK3	0.317774	2.77589	3.7897	0.000208081	0.00347104	Significantly upregulated (Adj-P<0.01)
ENSG00000267364.1_AC022706.1		-0.518299	0.385121	-3.7049	0.00028438	0.00434232	Significantly downregulated (Adj-P<0.01)
ENSG00000137040.9_RANBP6	RANBP6	-0.171119	4.69647	-3.83396	0.000176405	0.00310081	Significantly downregulated (Adj-P<0.01)
ENSG00000214357.8_NEURL1B	NEURL1B	0.29933	4.2901	3.83066	0.000178603	0.00312894	Significantly upregulated (Adj-P<0.01)
ENSG00000173156.6_RHOD	RHOD	-0.425685	2.12391	-3.75754	0.000234394	0.00379308	Significantly downregulated (Adj-P<0.01)
ENSG00000123572.16_NRK	NRK	0.601872	-0.285932	3.69169	0.000298419	0.00449117	Significantly upregulated (Adj-P<0.01)
ENSG00000197892.12_KIF13B	KIF13B	0.169925	3.37849	3.80922	0.000193499	0.00330507	Significantly upregulated (Adj-P<0.01)
ENSG00000168268.10_NT5DC2	NT5DC2	0.31872	1.65363	3.7445	0.000245937	0.00392298	Significantly upregulated (Adj-P<0.01)
ENSG00000114648.11_KLHL18	KLHL18	0.257286	3.27257	3.8043	0.000197082	0.00333944	Significantly upregulated (Adj-P<0.01)
ENSG00000165757.8_JCAD	JCAD	0.323904	4.34854	3.82891	0.000179776	0.00313898	Significantly upregulated (Adj-P<0.01)
ENSG00000102910.13_LONP2	LONP2	-0.115356	5.8477	-3.83187	0.000177791	0.0031182	Significantly downregulated (Adj-P<0.01)
ENSG00000100311.16_PDGFB	PDGFB	0.248984	3.5857	3.81019	0.000192801	0.00330354	Significantly upregulated (Adj-P<0.01)
ENSG00000166900.16_STX3	STX3	0.197975	2.31863	3.76025	0.000232061	0.00376698	Significantly upregulated (Adj-P<0.01)
ENSG00000134759.13_ELP2	ELP2	-0.169178	5.4684	-3.82775	0.000180556	0.0031491	Significantly downregulated (Adj-P<0.01)
ENSG00000185721.12_DRG1	DRG1	-0.135404	5.63169	-3.82686	0.000181156	0.00315594	Significantly downregulated (Adj-P<0.01)
ENSG00000138346.14_DNA2	DNA2	0.384723	0.501113	3.6909	0.000299281	0.00449982	Significantly upregulated (Adj-P<0.01)
ENSG00000184194.5_GPR173	GPR173	0.524486	-1.0881	3.67962	0.000311812	0.00464376	Significantly upregulated (Adj-P<0.01)
ENSG00000171723.15_GPHN	GPHN	-0.142299	4.05798	-3.80956	0.00019325	0.0033044	Significantly downregulated (Adj-P<0.01)
ENSG00000099875.14_MKNK2	MKNK2	-0.260678	8.74231	-3.79234	0.000206044	0.00345173	Significantly downregulated (Adj-P<0.01)
ENSG00000223953.5_C1QTNF5	C1QTNF5	0.402681	1.72421	3.73223	0.000257288	0.00404269	Significantly upregulated (Adj-P<0.01)
ENSG00000211584.13_SLC48A1	SLC48A1	-0.160976	4.26942	-3.81278	0.000190944	0.00328202	Significantly downregulated (Adj-P<0.01)
ENSG00000197457.9_STMN3	STMN3	0.384712	0.927981	3.70278	0.000286591	0.0043676	Significantly upregulated (Adj-P<0.01)
ENSG00000006042.11_TMEM98	TMEM98	0.382251	0.726717	3.692	0.000298077	0.00449033	Significantly upregulated (Adj-P<0.01)
ENSG00000111665.11_CDCA3	CDCA3	0.477681	-1.2976	3.67601	0.000315932	0.0046829	Significantly upregulated (Adj-P<0.01)
ENSG00000071205.11_ARHGAP10	ARHGAP10	-0.188186	4.86527	-3.81434	0.00018984	0.00326982	Significantly downregulated (Adj-P<0.01)
ENSG00000132604.10_TERF2	TERF2	-0.107203	4.2785	-3.80747	0.000194763	0.00331583	Significantly downregulated (Adj-P<0.01)
ENSG00000129245.11_FXR2	FXR2	-0.158504	6.61566	-3.80876	0.00019383	0.00330711	Significantly downregulated (Adj-P<0.01)
ENSG00000128917.7_DLL4	DLL4	0.306735	2.28095	3.74424	0.00024617	0.00392298	Significantly upregulated (Adj-P<0.01)
ENSG00000147256.11_ARHGAP36	ARHGAP36	0.712427	2.00186	3.73467	0.000254997	0.00401876	Significantly upregulated (Adj-P<0.01)
ENSG00000102781.13_KATNAL1	KATNAL1	0.223367	3.22166	3.77697	0.000218144	0.00360064	Significantly upregulated (Adj-P<0.01)
ENSG00000115561.15_CHMP3	CHMP3	-0.13193	6.47384	-3.8069	0.000195179	0.00331931	Significantly downregulated (Adj-P<0.01)
ENSG00000070214.15_SLC44A1	SLC44A1	0.21363	3.75775	3.79454	0.000204367	0.00343463	Significantly upregulated (Adj-P<0.01)
ENSG00000118363.11_SPCS2	SPCS2	-0.122769	4.96008	-3.80993	0.000192989	0.00330354	Significantly downregulated (Adj-P<0.01)
ENSG00000102172.15_SMS	SMS	0.223004	4.32487	3.8033	0.000197817	0.00334605	Significantly upregulated (Adj-P<0.01)
ENSG00000157216.15_SSBP3	SSBP3	-0.223933	4.42468	-3.80412	0.000197213	0.00333944	Significantly downregulated (Adj-P<0.01)
ENSG00000166123.13_GPT2	GPT2	-0.34824	7.86434	-3.79263	0.000205828	0.00345173	Significantly downregulated (Adj-P<0.01)
ENSG00000211448.11_DIO2	DIO2	0.531124	1.67443	3.71693	0.000272141	0.00421281	Significantly upregulated (Adj-P<0.01)
ENSG00000261603.2_PRSS46P	PRSS46P	-0.940847	-1.77825	-3.7009	0.000288567	0.00438877	Significantly downregulated (Adj-P<0.01)
ENSG00000167900.11_TK1	TK1	0.326781	0.747036	3.68211	0.000309006	0.00461715	Significantly upregulated (Adj-P<0.01)
ENSG00000140450.8_ARRDC4	ARRDC4	0.397824	3.38686	3.77799	0.000217319	0.0035914	Significantly upregulated (Adj-P<0.01)
ENSG00000232656.7_IDI2-AS1	IDI2-AS1	0.382901	1.683	3.71652	0.000272548	0.00421497	Significantly upregulated (Adj-P<0.01)
ENSG00000273117.1_AC144652.1		0.471313	-1.19712	3.66034	0.000334403	0.00490572	Significantly upregulated (Adj-P<0.01)
ENSG00000154175.16_ABI3BP	ABI3BP	0.446607	2.82776	3.75461	0.000236941	0.00381931	Significantly upregulated (Adj-P<0.01)
ENSG00000110852.4_CLEC2B	CLEC2B	0.371598	2.1085	3.72547	0.000263755	0.00411956	Significantly upregulated (Adj-P<0.01)
ENSG00000130307.11_USHBP1	USHBP1	0.271768	2.531	3.74716	0.000243544	0.00389622	Significantly upregulated (Adj-P<0.01)
ENSG00000108439.10_PNPO	PNPO	-0.131353	4.5391	-3.79756	0.000202086	0.00340725	Significantly downregulated (Adj-P<0.01)
ENSG00000128805.14_ARHGAP22	ARHGAP22	0.379451	0.509391	3.67043	0.000322397	0.00476075	Significantly upregulated (Adj-P<0.01)
ENSG00000182253.14_SYNM	SYNM	-0.215851	10.4299	-3.75133	0.000239824	0.00385595	Significantly downregulated (Adj-P<0.01)
ENSG00000166352.15_C11orf74	C11orf74	0.16522	3.2348	3.76436	0.000228564	0.00373338	Significantly upregulated (Adj-P<0.01)
ENSG00000173546.7_CSPG4	CSPG4	0.46996	4.54877	3.79475	0.000204206	0.00343463	Significantly upregulated (Adj-P<0.01)
ENSG00000078070.12_MCCC1	MCCC1	-0.177895	4.23731	-3.78992	0.000207908	0.00347104	Significantly downregulated (Adj-P<0.01)
ENSG00000183722.8_LHFPL6	LHFPL6	0.231581	3.52635	3.77348	0.000220979	0.00363597	Significantly upregulated (Adj-P<0.01)
ENSG00000178977.3_LINC00324	LINC00324	-0.384764	-0.619579	-3.6483	0.000349288	0.00505337	Significantly downregulated (Adj-P<0.01)
ENSG00000117519.15_CNN3	CNN3	0.290964	3.34159	3.76686	0.000226464	0.00370292	Significantly upregulated (Adj-P<0.01)
ENSG00000008018.8_PSMB1	PSMB1	-0.125509	5.98109	-3.79473	0.000204221	0.00343463	Significantly downregulated (Adj-P<0.01)
ENSG00000175344.17_CHRNA7	CHRNA7	-0.612311	-0.889019	-3.64947	0.000347808	0.00504579	Significantly downregulated (Adj-P<0.01)
ENSG00000169231.13_THBS3	THBS3	0.25856	2.76683	3.7486	0.000242256	0.00388172	Significantly upregulated (Adj-P<0.01)
ENSG00000091972.18_CD200	CD200	0.515577	-0.764647	3.64462	0.000353955	0.0050984	Significantly upregulated (Adj-P<0.01)
ENSG00000100568.10_VTI1B	VTI1B	-0.115577	5.81399	-3.79057	0.000207408	0.00347088	Significantly downregulated (Adj-P<0.01)
ENSG00000231721.7_LINC-PINT	LINC-PINT	-0.244557	2.92418	-3.74267	0.0002476	0.00393729	Significantly downregulated (Adj-P<0.01)
ENSG00000198824.6_CHAMP1	CHAMP1	-0.177221	3.13772	-3.7485	0.000242345	0.00388172	Significantly downregulated (Adj-P<0.01)
ENSG00000185585.19_OLFML2A	OLFML2A	0.336321	3.23121	3.75441	0.00023712	0.00381931	Significantly upregulated (Adj-P<0.01)
ENSG00000182923.17_CEP63	CEP63	-0.142982	4.81371	-3.78385	0.00021265	0.00353224	Significantly downregulated (Adj-P<0.01)
ENSG00000068383.18_INPP5A	INPP5A	-0.154486	5.82528	-3.78136	0.000214619	0.00355742	Significantly downregulated (Adj-P<0.01)
ENSG00000168067.11_MAP4K2	MAP4K2	0.227038	2.18576	3.7079	0.000281274	0.00431168	Significantly upregulated (Adj-P<0.01)
ENSG00000246731.2_MGC16275		0.434659	-0.797354	3.62809	0.000375678	0.00529355	Significantly upregulated (Adj-P<0.01)
ENSG00000134020.7_PEBP4	PEBP4	-0.273432	6.94762	-3.76979	0.000224018	0.00367825	Significantly downregulated (Adj-P<0.01)
ENSG00000175544.13_CABP4	CABP4	0.494991	-0.700134	3.62593	0.000378598	0.00531561	Significantly upregulated (Adj-P<0.01)
ENSG00000130158.13_DOCK6	DOCK6	0.292555	4.21132	3.76692	0.000226406	0.00370292	Significantly upregulated (Adj-P<0.01)
ENSG00000101882.9_NKAP	NKAP	-0.134835	4.11123	-3.76231	0.000230298	0.00374966	Significantly downregulated (Adj-P<0.01)
ENSG00000166913.12_YWHAB	YWHAB	-0.119548	5.86132	-3.77176	0.000222389	0.00365534	Significantly downregulated (Adj-P<0.01)
ENSG00000235865.2_GSN-AS1	GSN-AS1	0.527598	-0.370334	3.62156	0.000384593	0.00538053	Significantly upregulated (Adj-P<0.01)
ENSG00000151388.10_ADAMTS12	ADAMTS12	0.484701	0.483961	3.63574	0.000365465	0.00522219	Significantly upregulated (Adj-P<0.01)
ENSG00000189283.9_FHIT	FHIT	0.32795	0.700907	3.64349	0.000355398	0.00510869	Significantly upregulated (Adj-P<0.01)
ENSG00000076344.15_RGS11	RGS11	0.459326	1.00917	3.6579	0.000337372	0.00493198	Significantly upregulated (Adj-P<0.01)
ENSG00000117155.16_SSX2IP	SSX2IP	0.314097	2.23247	3.69502	0.000294816	0.00445402	Significantly upregulated (Adj-P<0.01)
ENSG00000154114.12_TBCEL	TBCEL	0.245811	2.84668	3.72333	0.000265833	0.00414789	Significantly upregulated (Adj-P<0.01)
ENSG00000161654.9_LSM12	LSM12	-0.134037	4.49787	-3.76407	0.000228807	0.00373345	Significantly downregulated (Adj-P<0.01)
ENSG00000179954.15_SSC5D	SSC5D	0.455578	1.67599	3.67841	0.000313193	0.0046576	Significantly upregulated (Adj-P<0.01)
ENSG00000058866.14_DGKG	DGKG	-0.388899	1.1225	-3.64478	0.000353749	0.0050984	Significantly downregulated (Adj-P<0.01)
ENSG00000159388.5_BTG2	BTG2	-0.581793	6.90693	-3.76206	0.000230517	0.00374966	Significantly downregulated (Adj-P<0.01)
ENSG00000205085.11_FAM71F2	FAM71F2	0.415589	1.02791	3.64866	0.000348828	0.00505337	Significantly upregulated (Adj-P<0.01)
ENSG00000172578.11_KLHL6	KLHL6	0.493313	-0.437193	3.61516	0.000393524	0.00548106	Significantly upregulated (Adj-P<0.01)
ENSG00000166033.12_HTRA1	HTRA1	0.371171	3.40546	3.73817	0.000251734	0.00398736	Significantly upregulated (Adj-P<0.01)
ENSG00000108342.12_CSF3	CSF3	-0.777932	0.920012	-3.64829	0.000349297	0.00505337	Significantly downregulated (Adj-P<0.01)
ENSG00000149294.16_NCAM1	NCAM1	0.516949	3.17939	3.73298	0.000256578	0.00403557	Significantly upregulated (Adj-P<0.01)
ENSG00000164808.16_SPIDR	SPIDR	0.159266	3.02517	3.72238	0.000266761	0.0041568	Significantly upregulated (Adj-P<0.01)
ENSG00000143127.12_ITGA10	ITGA10	0.418128	0.558062	3.62984	0.000373314	0.00528725	Significantly upregulated (Adj-P<0.01)
ENSG00000180155.19_LYNX1	LYNX1	0.344206	2.58392	3.71018	0.00027894	0.00428846	Significantly upregulated (Adj-P<0.01)
ENSG00000100023.18_PPIL2	PPIL2	-0.106604	4.71874	-3.7603	0.000232017	0.00376698	Significantly downregulated (Adj-P<0.01)
ENSG00000046653.14_GPM6B	GPM6B	0.324001	0.893548	3.6407	0.000358991	0.00515562	Significantly upregulated (Adj-P<0.01)
ENSG00000151789.11_ZNF385D	ZNF385D	0.351026	1.14123	3.64384	0.000354951	0.00510693	Significantly upregulated (Adj-P<0.01)
ENSG00000104946.12_TBC1D17	TBC1D17	-0.169953	6.14714	-3.75764	0.000234304	0.00379308	Significantly downregulated (Adj-P<0.01)
ENSG00000262655.3_SPON1	SPON1	0.825873	-1.28285	3.61295	0.000396656	0.00550027	Significantly upregulated (Adj-P<0.01)
ENSG00000120709.10_FAM53C	FAM53C	-0.171929	6.20194	-3.75695	0.000234905	0.00379743	Significantly downregulated (Adj-P<0.01)
ENSG00000163673.7_DCLK3	DCLK3	0.420038	-0.108387	3.6105	0.000400161	0.00554065	Significantly upregulated (Adj-P<0.01)
ENSG00000214402.6_LCNL1	LCNL1	0.52547	0.336002	3.62892	0.000374557	0.00528725	Significantly upregulated (Adj-P<0.01)
ENSG00000141030.12_COPS3	COPS3	-0.129102	6.00381	-3.7576	0.000234346	0.00379308	Significantly downregulated (Adj-P<0.01)
ENSG00000224699.8_LAMTOR5-AS1	LAMTOR5-AS1	0.341149	-0.384268	3.60577	0.000406999	0.00561887	Significantly upregulated (Adj-P<0.01)
ENSG00000092199.17_HNRNPC	HNRNPC	-0.111937	6.82192	-3.74941	0.000241526	0.00387653	Significantly downregulated (Adj-P<0.01)
ENSG00000275882.1_IKBKGP1	IKBKGP1	1.25468	-0.39206	3.60767	0.000404241	0.00558571	Significantly upregulated (Adj-P<0.01)
ENSG00000135974.9_C2orf49	C2orf49	-0.176091	4.02377	-3.74243	0.000247821	0.00393729	Significantly downregulated (Adj-P<0.01)
ENSG00000165914.14_TTC7B	TTC7B	0.188642	5.08134	3.75532	0.000236324	0.00381644	Significantly upregulated (Adj-P<0.01)
ENSG00000144847.12_IGSF11	IGSF11	0.343095	1.73027	3.65862	0.000336495	0.0049272	Significantly upregulated (Adj-P<0.01)
ENSG00000147471.11_PLPBP	PLPBP	-0.110248	4.75123	-3.75113	0.000239999	0.00385595	Significantly downregulated (Adj-P<0.01)
ENSG00000104964.14_AES	TLE5	-0.187219	8.75773	-3.72169	0.000267433	0.00416046	Significantly downregulated (Adj-P<0.01)
ENSG00000125388.19_GRK4	GRK4	0.190408	1.80114	3.66167	0.000332793	0.00488667	Significantly upregulated (Adj-P<0.01)
ENSG00000130590.13_SAMD10	SAMD10	0.465224	-0.921307	3.59518	0.000422698	0.00578155	Significantly upregulated (Adj-P<0.01)
ENSG00000135821.18_GLUL	GLUL	-0.398734	9.16312	-3.71799	0.000271082	0.00420888	Significantly downregulated (Adj-P<0.01)
ENSG00000002330.13_BAD	BAD	0.290839	3.34883	3.7222	0.000266934	0.0041568	Significantly upregulated (Adj-P<0.01)
ENSG00000108852.14_MPP2	MPP2	0.373582	-0.486255	3.59366	0.000425003	0.0058011	Significantly upregulated (Adj-P<0.01)
ENSG00000243696.4_AC006254.1		0.407918	6.77579	3.73681	0.000252991	0.00399757	Significantly upregulated (Adj-P<0.01)
ENSG00000196419.12_XRCC6	XRCC6	-0.0907123	7.1473	-3.7353	0.000254403	0.00401343	Significantly downregulated (Adj-P<0.01)
ENSG00000204396.10_VWA7	VWA7	-0.233045	3.41232	-3.71276	0.00027632	0.00425652	Significantly downregulated (Adj-P<0.01)
ENSG00000163359.15_COL6A3	COL6A3	0.380118	6.30992	3.73847	0.000251453	0.00398693	Significantly upregulated (Adj-P<0.01)
ENSG00000163875.15_MEAF6	MEAF6	-0.127194	4.24606	-3.73332	0.00025626	0.00403461	Significantly downregulated (Adj-P<0.01)
ENSG00000057468.6_MSH4	MSH4	-0.547222	-0.86888	-3.58978	0.000430937	0.0058509	Significantly downregulated (Adj-P<0.01)
ENSG00000102974.15_CTCF	CTCF	-0.145017	5.21914	-3.74045	0.000249627	0.00396197	Significantly downregulated (Adj-P<0.01)
ENSG00000085978.21_ATG16L1	ATG16L1	-0.123592	4.11745	-3.7267	0.00026257	0.00410924	Significantly downregulated (Adj-P<0.01)
ENSG00000139679.15_LPAR6	LPAR6	0.344206	2.26326	3.66388	0.000330142	0.00486005	Significantly upregulated (Adj-P<0.01)
ENSG00000169925.16_BRD3	BRD3	-0.167207	5.17284	-3.73782	0.00025206	0.00398849	Significantly downregulated (Adj-P<0.01)
ENSG00000183578.7_TNFAIP8L3	TNFAIP8L3	0.76804	-1.45901	3.59168	0.000428012	0.00582626	Significantly upregulated (Adj-P<0.01)
ENSG00000175946.8_KLHL38	KLHL38	-0.273536	6.56864	-3.73095	0.000258497	0.00405763	Significantly downregulated (Adj-P<0.01)
ENSG00000100170.9_SLC5A1	SLC5A1	-1.10848	-1.6213	-3.61042	0.000400274	0.00554065	Significantly downregulated (Adj-P<0.01)
ENSG00000279696.1_AP001273.1		-0.269556	0.516336	-3.59509	0.000422833	0.00578155	Significantly downregulated (Adj-P<0.01)
ENSG00000137726.16_FXYD6	FXYD6	0.228066	3.3604	3.70716	0.000282043	0.00431924	Significantly upregulated (Adj-P<0.01)
ENSG00000260793.2_AC003102.1		0.377958	-0.138856	3.58647	0.000436042	0.00589041	Significantly upregulated (Adj-P<0.01)
ENSG00000196950.13_SLC39A10	SLC39A10	0.296636	1.46527	3.62555	0.000379115	0.00531812	Significantly upregulated (Adj-P<0.01)
ENSG00000101224.17_CDC25B	CDC25B	0.24953	2.59186	3.67353	0.000318796	0.00471643	Significantly upregulated (Adj-P<0.01)
ENSG00000222041.11_CYTOR	CYTOR	0.478003	-0.198105	3.5771	0.000450849	0.00602809	Significantly upregulated (Adj-P<0.01)
ENSG00000067365.14_METTL22	METTL22	0.180113	4.62183	3.72784	0.000261465	0.00410012	Significantly upregulated (Adj-P<0.01)
ENSG00000100320.22_RBFOX2	RBFOX2	-0.168282	7.3048	-3.71767	0.000271404	0.00420971	Significantly downregulated (Adj-P<0.01)
ENSG00000115457.9_IGFBP2	IGFBP2	0.381209	2.19668	3.65783	0.00033745	0.00493198	Significantly upregulated (Adj-P<0.01)
ENSG00000117899.10_MESD	MESD	-0.127711	3.35208	-3.69547	0.000294335	0.00445402	Significantly downregulated (Adj-P<0.01)
ENSG00000136802.11_LRRC8A	LRRC8A	0.177282	3.34786	3.69734	0.000292331	0.00442927	Significantly upregulated (Adj-P<0.01)
ENSG00000148660.20_CAMK2G	CAMK2G	-0.150603	7.1503	-3.71738	0.000271694	0.00421005	Significantly downregulated (Adj-P<0.01)
ENSG00000159433.11_STARD9	STARD9	0.277613	3.86838	3.71385	0.000275223	0.00425214	Significantly upregulated (Adj-P<0.01)
ENSG00000260805.2_AC092803.2		0.489437	-0.0751679	3.57816	0.000449143	0.0060104	Significantly upregulated (Adj-P<0.01)
ENSG00000197296.5_FITM2	FITM2	-0.16313	3.93028	-3.71042	0.000278694	0.00428846	Significantly downregulated (Adj-P<0.01)
ENSG00000161671.16_EMC10	EMC10	0.323209	8.48158	3.69748	0.000292189	0.00442927	Significantly upregulated (Adj-P<0.01)
ENSG00000053747.16_LAMA3	LAMA3	0.389453	1.78467	3.63505	0.000366377	0.0052282	Significantly upregulated (Adj-P<0.01)
ENSG00000188643.10_S100A16	S100A16	0.319511	3.02189	3.68296	0.000308058	0.00460971	Significantly upregulated (Adj-P<0.01)
ENSG00000163933.9_RFT1	RFT1	-0.178295	1.88957	-3.62841	0.000375235	0.00529206	Significantly downregulated (Adj-P<0.01)
ENSG00000099139.13_PCSK5	PCSK5	0.493084	0.793312	3.59045	0.000429899	0.00584254	Significantly upregulated (Adj-P<0.01)
ENSG00000204366.3_ZBTB12	ZBTB12	0.336699	0.387372	3.58206	0.000442963	0.00594798	Significantly upregulated (Adj-P<0.01)
ENSG00000151348.13_EXT2	EXT2	0.130678	3.58798	3.69519	0.000294633	0.00445402	Significantly upregulated (Adj-P<0.01)
ENSG00000140743.7_CDR2	CDR2	0.277965	1.17763	3.5989	0.000417116	0.0057434	Significantly upregulated (Adj-P<0.01)
ENSG00000104848.1_KCNA7	KCNA7	-0.273988	6.55899	-3.7088	0.000280355	0.00430179	Significantly downregulated (Adj-P<0.01)
ENSG00000214193.10_SH3D21	SH3D21	0.325684	0.130119	3.57156	0.000459821	0.00612718	Significantly upregulated (Adj-P<0.01)
ENSG00000107341.4_UBE2R2	UBE2R2	-0.125844	5.83291	-3.71289	0.000276189	0.00425652	Significantly downregulated (Adj-P<0.01)
ENSG00000158406.4_HIST1H4H	HIST1H4H	-0.268615	1.76361	-3.61434	0.000394682	0.00549004	Significantly downregulated (Adj-P<0.01)
ENSG00000174839.12_DENND6A	DENND6A	0.185995	3.34828	3.67983	0.000311583	0.00464376	Significantly upregulated (Adj-P<0.01)
ENSG00000186106.11_ANKRD46	ANKRD46	-0.211679	5.4215	-3.71308	0.000275997	0.00425652	Significantly downregulated (Adj-P<0.01)
ENSG00000182324.6_KCNJ14	KCNJ14	0.423787	0.142201	3.56377	0.000472716	0.00624072	Significantly upregulated (Adj-P<0.01)
ENSG00000197380.10_DACT3	DACT3	0.628256	-0.869669	3.55038	0.000495684	0.00648936	Significantly upregulated (Adj-P<0.01)
ENSG00000126217.20_MCF2L	MCF2L	0.292032	4.52151	3.70587	0.000283378	0.00433123	Significantly upregulated (Adj-P<0.01)
ENSG00000164687.10_FABP5	FABP5	0.272293	3.80719	3.69301	0.000296986	0.00447818	Significantly upregulated (Adj-P<0.01)
ENSG00000267858.5_MZF1-AS1	MZF1-AS1	0.401655	-0.620004	3.54829	0.000499361	0.00652662	Significantly upregulated (Adj-P<0.01)
ENSG00000134369.15_NAV1	NAV1	0.265943	3.65915	3.68587	0.000304805	0.00456975	Significantly upregulated (Adj-P<0.01)
ENSG00000204272.12_NBDY	NBDY	0.302251	1.50012	3.60404	0.000409526	0.0056488	Significantly upregulated (Adj-P<0.01)
ENSG00000143320.8_CRABP2	CRABP2	0.666703	-0.392633	3.54584	0.00050372	0.00657812	Significantly upregulated (Adj-P<0.01)
ENSG00000142192.20_APP	APP	0.238297	6.03896	3.70074	0.000288726	0.00438877	Significantly upregulated (Adj-P<0.01)
ENSG00000175567.8_UCP2	UCP2	0.355285	5.18102	3.70287	0.000286495	0.0043676	Significantly upregulated (Adj-P<0.01)
ENSG00000142408.4_CACNG8	CACNG8	0.425445	0.635372	3.56928	0.000463559	0.00615608	Significantly upregulated (Adj-P<0.01)
ENSG00000136238.17_RAC1	RAC1	-0.120471	6.79307	-3.69437	0.00029552	0.00446036	Significantly downregulated (Adj-P<0.01)
ENSG00000115274.14_INO80B	INO80B	0.314403	2.63099	3.6517	0.000345015	0.0050099	Significantly upregulated (Adj-P<0.01)
ENSG00000185652.11_NTF3	NTF3	-0.475177	-0.766292	-3.54089	0.000512595	0.00668289	Significantly downregulated (Adj-P<0.01)
ENSG00000187513.8_GJA4	GJA4	0.320209	1.80831	3.60982	0.000401133	0.00554766	Significantly upregulated (Adj-P<0.01)
ENSG00000175166.16_PSMD2	PSMD2	-0.134006	7.63778	-3.68526	0.000305486	0.00457558	Significantly downregulated (Adj-P<0.01)
ENSG00000126524.9_SBDS	SBDS	-0.17234	7.2571	-3.68614	0.000304514	0.00456974	Significantly downregulated (Adj-P<0.01)
ENSG00000091592.15_NLRP1	NLRP1	0.268318	3.50854	3.67214	0.000320406	0.00473579	Significantly upregulated (Adj-P<0.01)
ENSG00000129235.10_TXNDC17	TXNDC17	0.230014	2.36332	3.62902	0.000374415	0.00528725	Significantly upregulated (Adj-P<0.01)
ENSG00000084731.14_KIF3C	KIF3C	0.239948	1.37355	3.58681	0.000435517	0.00589041	Significantly upregulated (Adj-P<0.01)
ENSG00000050426.15_LETMD1	LETMD1	0.190271	3.78385	3.67647	0.000315403	0.00467948	Significantly upregulated (Adj-P<0.01)
ENSG00000196476.11_C20orf96	C20orf96	0.32677	-0.524757	3.5356	0.000522262	0.00678077	Significantly upregulated (Adj-P<0.01)
ENSG00000198830.10_HMGN2	HMGN2	-0.181286	6.31211	-3.69005	0.000300205	0.0045094	Significantly downregulated (Adj-P<0.01)
ENSG00000121068.13_TBX2	TBX2	0.331771	2.82125	3.6459	0.000352325	0.0050878	Significantly upregulated (Adj-P<0.01)
ENSG00000114993.16_RTKN	RTKN	0.241945	2.42298	3.62928	0.000374073	0.00528725	Significantly upregulated (Adj-P<0.01)
ENSG00000198478.7_SH3BGRL2	SH3BGRL2	0.324562	2.52947	3.62712	0.000376984	0.00530243	Significantly upregulated (Adj-P<0.01)
ENSG00000184014.7_DENND5A	DENND5A	0.172538	4.41951	3.68172	0.000309449	0.00461732	Significantly upregulated (Adj-P<0.01)
ENSG00000148795.6_CYP17A1	CYP17A1	-0.486982	-0.74398	-3.52417	0.000543714	0.0069275	Significantly downregulated (Adj-P<0.01)
ENSG00000123612.15_ACVR1C	ACVR1C	-0.526864	0.521761	-3.53827	0.000517364	0.00672637	Significantly downregulated (Adj-P<0.01)
ENSG00000131477.10_RAMP2	RAMP2	0.27696	2.56278	3.62896	0.000374492	0.00528725	Significantly upregulated (Adj-P<0.01)
ENSG00000198844.11_ARHGEF15	ARHGEF15	0.271138	3.37295	3.65699	0.000338488	0.00493797	Significantly upregulated (Adj-P<0.01)
ENSG00000108106.13_UBE2S	UBE2S	0.440765	1.81515	3.59844	0.00041781	0.00574791	Significantly upregulated (Adj-P<0.01)
ENSG00000141837.19_CACNA1A	CACNA1A	0.626087	-1.50558	3.53244	0.000528114	0.00683511	Significantly upregulated (Adj-P<0.01)
ENSG00000159873.9_CCDC117	CCDC117	-0.19362	4.5382	-3.67828	0.000313336	0.0046576	Significantly downregulated (Adj-P<0.01)
ENSG00000198039.11_ZNF273	ZNF273	-0.508019	2.33564	-3.61524	0.000393409	0.00548106	Significantly downregulated (Adj-P<0.01)
ENSG00000131196.17_NFATC1	NFATC1	-0.203963	5.46009	-3.68199	0.000309143	0.00461715	Significantly downregulated (Adj-P<0.01)
ENSG00000118162.13_KPTN	KPTN	0.258875	1.97234	3.59771	0.000418901	0.00575283	Significantly upregulated (Adj-P<0.01)
ENSG00000117868.15_ESYT2	ESYT2	-0.132329	6.1128	-3.67676	0.000315077	0.00467906	Significantly downregulated (Adj-P<0.01)
ENSG00000110880.10_CORO1C	CORO1C	0.223712	3.93571	3.66443	0.000329484	0.00485625	Significantly upregulated (Adj-P<0.01)
ENSG00000129566.12_TEP1	TEP1	0.246177	4.91993	3.67562	0.000316381	0.00468512	Significantly upregulated (Adj-P<0.01)
ENSG00000100281.13_HMGXB4	HMGXB4	-0.181207	3.16197	-3.63233	0.000369978	0.00526523	Significantly downregulated (Adj-P<0.01)
ENSG00000177096.8_PHETA2	PHETA2	0.391223	0.369231	3.53096	0.000530871	0.00684161	Significantly upregulated (Adj-P<0.01)
ENSG00000133110.14_POSTN	POSTN	1.09293	0.523041	3.52972	0.000533206	0.00685645	Significantly upregulated (Adj-P<0.01)
ENSG00000096746.17_HNRNPH3	HNRNPH3	-0.132485	6.27111	-3.6698	0.000323134	0.00476713	Significantly downregulated (Adj-P<0.01)
ENSG00000230561.4_CCDC192	CCDC192	-0.675844	-1.73656	-3.52477	0.000542578	0.00691864	Significantly downregulated (Adj-P<0.01)
ENSG00000139173.9_TMEM117	TMEM117	0.222091	1.54728	3.56527	0.00047021	0.00621727	Significantly upregulated (Adj-P<0.01)
ENSG00000145022.4_TCTA	TCTA	0.205138	3.07961	3.63261	0.000369609	0.00526474	Significantly upregulated (Adj-P<0.01)
ENSG00000055044.10_NOP58	NOP58	-0.117807	4.38712	-3.6631	0.00033108	0.00486608	Significantly downregulated (Adj-P<0.01)
ENSG00000168566.12_SNRNP48	SNRNP48	-0.184935	4.05656	-3.6571	0.000338348	0.00493797	Significantly downregulated (Adj-P<0.01)
ENSG00000003147.18_ICA1	ICA1	0.343086	0.439661	3.52619	0.000539869	0.00690079	Significantly upregulated (Adj-P<0.01)
ENSG00000215375.6_MYL5	MYL5	0.631791	2.03101	3.59247	0.00042682	0.00581579	Significantly upregulated (Adj-P<0.01)
ENSG00000164941.13_INTS8	INTS8	-0.156698	3.86264	-3.64758	0.000350187	0.0050616	Significantly downregulated (Adj-P<0.01)
ENSG00000198408.13_OGA	OGA	-0.148738	6.32412	-3.6637	0.000330361	0.00486005	Significantly downregulated (Adj-P<0.01)
ENSG00000120318.15_ARAP3	ARAP3	0.268667	3.23836	3.62985	0.000373307	0.00528725	Significantly upregulated (Adj-P<0.01)
ENSG00000118369.12_USP35	USP35	0.229838	2.28444	3.59148	0.000428331	0.00582626	Significantly upregulated (Adj-P<0.01)
ENSG00000244462.7_RBM12	RBM12	-0.208557	4.46374	-3.65451	0.000341537	0.0049732	Significantly downregulated (Adj-P<0.01)
ENSG00000146122.16_DAAM2	DAAM2	0.3586	5.00151	3.65966	0.000335232	0.0049133	Significantly upregulated (Adj-P<0.01)
ENSG00000204843.12_DCTN1	DCTN1	-0.126585	6.63357	-3.65346	0.000342826	0.00498734	Significantly downregulated (Adj-P<0.01)
ENSG00000164122.8_ASB5	ASB5	-0.257236	7.69835	-3.64456	0.000354033	0.0050984	Significantly downregulated (Adj-P<0.01)
ENSG00000175591.11_P2RY2	P2RY2	-0.186508	4.81859	-3.65624	0.000339399	0.00494666	Significantly downregulated (Adj-P<0.01)
ENSG00000272886.5_DCP1A	DCP1A	-0.144762	3.93865	-3.63562	0.000365623	0.00522219	Significantly downregulated (Adj-P<0.01)
ENSG00000110713.16_NUP98	NUP98	-0.149567	5.75281	-3.65212	0.000344501	0.00500707	Significantly downregulated (Adj-P<0.01)
ENSG00000134285.10_FKBP11	FKBP11	0.287894	0.726367	3.51416	0.000563202	0.00713225	Significantly upregulated (Adj-P<0.01)
ENSG00000172986.12_GXYLT2	GXYLT2	0.55288	-0.849711	3.48483	0.000624101	0.00771379	Significantly upregulated (Adj-P<0.01)
ENSG00000166068.12_SPRED1	SPRED1	0.247529	2.53514	3.58361	0.000440512	0.00592521	Significantly upregulated (Adj-P<0.01)
ENSG00000276728.1_AC142472.1		0.404131	-0.529385	3.48262	0.000628924	0.00774899	Significantly upregulated (Adj-P<0.01)
ENSG00000181585.4_TMIE	TMIE	0.398833	0.241065	3.49732	0.000597445	0.00747259	Significantly upregulated (Adj-P<0.01)
ENSG00000140577.15_CRTC3	CRTC3	0.160324	3.9207	3.63125	0.000371422	0.0052762	Significantly upregulated (Adj-P<0.01)
ENSG00000115641.18_FHL2	FHL2	-0.362215	4.32546	-3.63748	0.000363187	0.00520634	Significantly downregulated (Adj-P<0.01)
ENSG00000172932.14_ANKRD13D	ANKRD13D	0.280595	2.052	3.56526	0.000470217	0.00621727	Significantly upregulated (Adj-P<0.01)
ENSG00000108424.9_KPNB1	KPNB1	-0.099698	6.75186	-3.63634	0.000364685	0.00522219	Significantly downregulated (Adj-P<0.01)
ENSG00000271614.1_ATP2B1-AS1	ATP2B1-AS1	0.28458	0.272171	3.49036	0.000612152	0.00762011	Significantly upregulated (Adj-P<0.01)
ENSG00000028203.17_VEZT	VEZT	-0.150643	5.8742	-3.63855	0.000361789	0.00519105	Significantly downregulated (Adj-P<0.01)
ENSG00000163126.14_ANKRD23	ANKRD23	-0.19366	10.5248	-3.58295	0.000441548	0.00593406	Significantly downregulated (Adj-P<0.01)
ENSG00000263465.4_SRSF8	SRSF8	-0.163809	4.16474	-3.62645	0.00037789	0.00531042	Significantly downregulated (Adj-P<0.01)
ENSG00000148308.17_GTF3C5	GTF3C5	-0.138648	4.91511	-3.63569	0.000365538	0.00522219	Significantly downregulated (Adj-P<0.01)
ENSG00000117592.8_PRDX6	PRDX6	-0.159728	7.61439	-3.62107	0.000385263	0.0053851	Significantly downregulated (Adj-P<0.01)
ENSG00000132003.9_ZSWIM4	ZSWIM4	0.388693	-0.163729	3.47165	0.000653429	0.00795107	Significantly upregulated (Adj-P<0.01)
ENSG00000106012.17_IQCE	IQCE	0.195711	2.59916	3.57446	0.000455101	0.00607459	Significantly upregulated (Adj-P<0.01)
ENSG00000166685.11_COG1	COG1	-0.105723	4.66782	-3.63198	0.000370445	0.0052671	Significantly downregulated (Adj-P<0.01)
ENSG00000147454.13_SLC25A37	SLC25A37	-0.185322	5.73591	-3.63278	0.000369384	0.00526474	Significantly downregulated (Adj-P<0.01)
ENSG00000240801.1_AC132217.1		0.596589	0.827996	3.50227	0.00058717	0.00737344	Significantly upregulated (Adj-P<0.01)
ENSG00000120451.10_SNX19	SNX19	-0.196894	5.38663	-3.63092	0.00037187	0.0052778	Significantly downregulated (Adj-P<0.01)
ENSG00000105879.11_CBLL1	CBLL1	-0.165331	4.73031	-3.62737	0.000376645	0.00530242	Significantly downregulated (Adj-P<0.01)
ENSG00000107282.7_APBA1	APBA1	-0.337614	2.71504	-3.56895	0.000464107	0.00615814	Significantly downregulated (Adj-P<0.01)
ENSG00000259158.4_ADAM20P1	ADAM20P1	-0.414111	-0.523626	-3.45871	0.000683491	0.00820869	Significantly downregulated (Adj-P<0.01)
ENSG00000118308.15_LRMP	LRMP	0.429743	-0.681631	3.45782	0.000685586	0.00822756	Significantly upregulated (Adj-P<0.01)
ENSG00000169139.11_UBE2V2	UBE2V2	-0.148271	5.24307	-3.62522	0.000379567	0.0053197	Significantly downregulated (Adj-P<0.01)
ENSG00000110492.15_MDK	MDK	0.433311	0.408182	3.47798	0.000639189	0.00782022	Significantly upregulated (Adj-P<0.01)
ENSG00000037474.14_NSUN2	NSUN2	-0.0946683	5.33325	-3.62492	0.000379982	0.00532076	Significantly downregulated (Adj-P<0.01)
ENSG00000125247.15_TMTC4	TMTC4	-0.239431	3.31305	-3.58647	0.000436049	0.00589041	Significantly downregulated (Adj-P<0.01)
ENSG00000173218.14_VANGL1	VANGL1	0.305124	0.823157	3.4856	0.000622417	0.0077112	Significantly upregulated (Adj-P<0.01)
ENSG00000124549.14_BTN2A3P	BTN2A3P	0.377434	-0.530513	3.45201	0.000699553	0.00834414	Significantly upregulated (Adj-P<0.01)
ENSG00000101558.13_VAPA	VAPA	-0.115283	6.67309	-3.61421	0.000394869	0.00549004	Significantly downregulated (Adj-P<0.01)
ENSG00000162849.15_KIF26B	KIF26B	0.405673	-1.02566	3.44952	0.000705601	0.00838442	Significantly upregulated (Adj-P<0.01)
ENSG00000037042.8_TUBG2	TUBG2	0.246509	1.88335	3.53171	0.000529467	0.00683511	Significantly upregulated (Adj-P<0.01)
ENSG00000167325.14_RRM1	RRM1	-0.145203	4.97406	-3.61791	0.000389665	0.00544179	Significantly downregulated (Adj-P<0.01)
ENSG00000065029.14_ZNF76	ZNF76	-0.154421	5.49646	-3.61609	0.000392223	0.00547264	Significantly downregulated (Adj-P<0.01)
ENSG00000140718.20_FTO	FTO	-0.165306	4.6719	-3.61311	0.000396435	0.00550027	Significantly downregulated (Adj-P<0.01)
ENSG00000185883.11_ATP6V0C	ATP6V0C	-0.151557	5.71281	-3.61381	0.000395444	0.00549317	Significantly downregulated (Adj-P<0.01)
ENSG00000237765.6_FAM200B	FAM200B	0.154533	3.18134	3.57496	0.0004543	0.00606907	Significantly upregulated (Adj-P<0.01)
ENSG00000125249.6_RAP2A	RAP2A	0.235425	4.22796	3.60166	0.000413018	0.00569196	Significantly upregulated (Adj-P<0.01)
ENSG00000061938.17_TNK2	TNK2	-0.270952	7.37874	-3.59625	0.000421088	0.00577569	Significantly downregulated (Adj-P<0.01)
ENSG00000135093.12_USP30	USP30	-0.128438	3.69111	-3.5865	0.000436006	0.00589041	Significantly downregulated (Adj-P<0.01)
ENSG00000259030.7_FPGT-TNNI3K	FPGT-TNNI3K	-0.385092	1.15045	-3.48191	0.00063048	0.00775541	Significantly downregulated (Adj-P<0.01)
ENSG00000115687.13_PASK	PASK	0.293226	0.576491	3.46599	0.000666411	0.00805916	Significantly upregulated (Adj-P<0.01)
ENSG00000112902.11_SEMA5A	SEMA5A	0.316914	1.99919	3.51643	0.000558719	0.00709564	Significantly upregulated (Adj-P<0.01)
ENSG00000231768.1_LINC01354	LINC01354	0.448897	-0.482148	3.43488	0.00074225	0.00871436	Significantly upregulated (Adj-P<0.01)
ENSG00000016864.18_GLT8D1	GLT8D1	0.126619	3.24942	3.57005	0.00046229	0.00614963	Significantly upregulated (Adj-P<0.01)
ENSG00000152192.7_POU4F1	POU4F1	0.534542	-1.07513	3.4289	0.000757725	0.00884971	Significantly upregulated (Adj-P<0.01)
ENSG00000135749.18_PCNX2	PCNX2	0.389855	-0.0804546	3.435	0.000741941	0.00871436	Significantly upregulated (Adj-P<0.01)
ENSG00000123096.11_SSPN	SSPN	-0.205948	6.56625	-3.59281	0.000426291	0.00581364	Significantly downregulated (Adj-P<0.01)
ENSG00000108468.14_CBX1	CBX1	-0.112869	5.57395	-3.59793	0.000418569	0.00575283	Significantly downregulated (Adj-P<0.01)
ENSG00000184220.11_CMSS1	CMSS1	-0.260378	3.24507	-3.55758	0.000483214	0.00636326	Significantly downregulated (Adj-P<0.01)
ENSG00000184678.10_HIST2H2BE	HIST2H2BE	-0.226387	4.9471	-3.59611	0.000421301	0.00577569	Significantly downregulated (Adj-P<0.01)
ENSG00000189409.13_MMP23B	MMP23B	0.756006	-1.73454	3.4261	0.000765062	0.00890888	Significantly upregulated (Adj-P<0.01)
ENSG00000083838.15_ZNF446	ZNF446	0.194026	1.84215	3.50438	0.000582851	0.00733093	Significantly upregulated (Adj-P<0.01)
ENSG00000125810.9_CD93	CD93	0.348038	5.19049	3.59555	0.000422146	0.00578155	Significantly upregulated (Adj-P<0.01)
ENSG00000125944.19_HNRNPR	HNRNPR	-0.106596	5.57001	-3.5943	0.000424038	0.00579297	Significantly downregulated (Adj-P<0.01)
ENSG00000152422.15_XRCC4	XRCC4	0.394765	-0.378574	3.42101	0.000778581	0.00901231	Significantly upregulated (Adj-P<0.01)
ENSG00000091732.16_ZC3HC1	ZC3HC1	-0.123488	3.98236	-3.57823	0.000449033	0.0060104	Significantly downregulated (Adj-P<0.01)
ENSG00000100478.14_AP4S1	AP4S1	-0.147952	2.95585	-3.54184	0.00051089	0.00666619	Significantly downregulated (Adj-P<0.01)
ENSG00000044524.10_EPHA3	EPHA3	0.59384	-0.0477057	3.42722	0.000762116	0.00888117	Significantly upregulated (Adj-P<0.01)
ENSG00000265241.6_RBM8A	RBM8A	-0.116878	5.85478	-3.58957	0.00043126	0.0058509	Significantly downregulated (Adj-P<0.01)
ENSG00000185798.7_WDR53	WDR53	-0.172601	1.83965	-3.48938	0.000614264	0.00764033	Significantly downregulated (Adj-P<0.01)
ENSG00000143537.13_ADAM15	ADAM15	0.220781	4.57304	3.58527	0.000437925	0.00590052	Significantly upregulated (Adj-P<0.01)
ENSG00000163807.5_KIAA1143	KIAA1143	-0.177229	5.17994	-3.58932	0.000431645	0.00585106	Significantly downregulated (Adj-P<0.01)
ENSG00000184481.16_FOXO4	FOXO4	-0.179322	6.06682	-3.58558	0.000437428	0.0058989	Significantly downregulated (Adj-P<0.01)
ENSG00000131697.17_NPHP4	NPHP4	0.311085	0.857965	3.45739	0.000686614	0.00823359	Significantly upregulated (Adj-P<0.01)
ENSG00000107758.15_PPP3CB	PPP3CB	-0.195877	8.09364	-3.5663	0.000468491	0.00620583	Significantly downregulated (Adj-P<0.01)
ENSG00000185090.14_MANEAL	MANEAL	-0.239711	1.32819	-3.46577	0.000666936	0.00805919	Significantly downregulated (Adj-P<0.01)
ENSG00000115540.14_MOB4	MOB4	-0.176515	5.04213	-3.58605	0.000436699	0.00589412	Significantly downregulated (Adj-P<0.01)
ENSG00000184216.13_IRAK1	IRAK1	0.265326	5.07939	3.58458	0.000438999	0.00590992	Significantly upregulated (Adj-P<0.01)
ENSG00000143494.15_VASH2	VASH2	0.601307	-0.427456	3.41041	0.000807491	0.00921832	Significantly upregulated (Adj-P<0.01)
ENSG00000165138.17_ANKS6	ANKS6	0.147641	2.87511	3.53463	0.000524059	0.00679424	Significantly upregulated (Adj-P<0.01)
ENSG00000135452.9_TSPAN31	TSPAN31	-0.118961	3.6499	-3.55574	0.000486375	0.00638882	Significantly downregulated (Adj-P<0.01)
ENSG00000112062.10_MAPK14	MAPK14	-0.122983	5.43509	-3.58165	0.000443598	0.00595142	Significantly downregulated (Adj-P<0.01)
ENSG00000235863.3_B3GALT4	B3GALT4	0.358979	0.176234	3.42344	0.000772103	0.00896638	Significantly upregulated (Adj-P<0.01)
ENSG00000115053.15_NCL	NCL	-0.100796	7.805	-3.56196	0.000475768	0.00627047	Significantly downregulated (Adj-P<0.01)
ENSG00000164509.13_IL31RA	IL31RA	0.814906	0.0351804	3.4195	0.000782638	0.00901988	Significantly upregulated (Adj-P<0.01)
ENSG00000143994.13_ABHD1	ABHD1	0.323877	1.80386	3.4831	0.000627872	0.00774211	Significantly upregulated (Adj-P<0.01)
ENSG00000165424.6_ZCCHC24	ZCCHC24	-0.212588	6.4187	-3.5739	0.000456008	0.00608153	Significantly downregulated (Adj-P<0.01)
ENSG00000137492.7_THAP12	THAP12	-0.128355	5.22191	-3.57847	0.000448656	0.0060104	Significantly downregulated (Adj-P<0.01)
ENSG00000136758.18_YME1L1	YME1L1	-0.117592	7.01035	-3.56743	0.000466609	0.00618612	Significantly downregulated (Adj-P<0.01)
ENSG00000278869.1_BX539320.1		0.649345	-1.67411	3.40548	0.000821268	0.00930259	Significantly upregulated (Adj-P<0.01)
ENSG00000165916.8_PSMC3	PSMC3	-0.166745	6.5836	-3.5697	0.000462863	0.00615204	Significantly downregulated (Adj-P<0.01)
ENSG00000135916.15_ITM2C	ITM2C	0.238795	3.13179	3.53457	0.000524166	0.00679424	Significantly upregulated (Adj-P<0.01)
ENSG00000141627.13_DYM	DYM	-0.139517	5.8291	-3.57082	0.000461035	0.00613814	Significantly downregulated (Adj-P<0.01)
ENSG00000167874.6_TMEM88	TMEM88	0.270838	1.85455	3.48171	0.000630927	0.00775541	Significantly upregulated (Adj-P<0.01)
ENSG00000130518.16_IQCN	IQCN	0.323918	0.882895	3.43915	0.000731379	0.00861663	Significantly upregulated (Adj-P<0.01)
ENSG00000150995.19_ITPR1	ITPR1	0.282648	2.37925	3.4943	0.000603796	0.00752803	Significantly upregulated (Adj-P<0.01)
ENSG00000114450.9_GNB4	GNB4	0.290981	2.08605	3.47902	0.000636862	0.00780392	Significantly upregulated (Adj-P<0.01)
ENSG00000142002.17_DPP9	DPP9	-0.155465	5.86196	-3.56507	0.000470543	0.00621727	Significantly downregulated (Adj-P<0.01)
ENSG00000274270.1_AL137060.1		0.622544	-1.23348	3.38918	0.000868406	0.00963348	Significantly upregulated (Adj-P<0.01)
ENSG00000184208.10_C22orf46	C22orf46	0.201593	3.19482	3.5282	0.000536066	0.00687632	Significantly upregulated (Adj-P<0.01)
ENSG00000108231.12_LGI1	LGI1	-0.49754	2.40201	-3.48523	0.000623224	0.00771379	Significantly downregulated (Adj-P<0.01)
ENSG00000163644.14_PPM1K	PPM1K	-0.453047	4.88292	-3.56203	0.00047565	0.00627047	Significantly downregulated (Adj-P<0.01)
ENSG00000132004.12_FBXW9	FBXW9	0.312196	-0.134274	3.3953	0.000850414	0.00950103	Significantly upregulated (Adj-P<0.01)
ENSG00000198818.9_SFT2D1	SFT2D1	-0.132013	3.16298	-3.52049	0.000550803	0.00701213	Significantly downregulated (Adj-P<0.01)
ENSG00000171763.18_SPATA5L1	SPATA5L1	-0.17543	3.07721	-3.51756	0.000556519	0.00707915	Significantly downregulated (Adj-P<0.01)
ENSG00000106089.11_STX1A	STX1A	-0.312743	-0.249881	-3.39014	0.000865569	0.00960879	Significantly downregulated (Adj-P<0.01)
ENSG00000134490.13_TMEM241	TMEM241	0.323467	-0.144939	3.39226	0.000859311	0.00957658	Significantly upregulated (Adj-P<0.01)
ENSG00000114812.12_VIPR1	VIPR1	0.469513	0.0717945	3.39962	0.000837916	0.00942175	Significantly upregulated (Adj-P<0.01)
ENSG00000153214.10_TMEM87B	TMEM87B	0.238929	1.71345	3.45478	0.000692858	0.00827683	Significantly upregulated (Adj-P<0.01)
ENSG00000169919.16_GUSB	GUSB	0.148706	3.75024	3.53858	0.000516799	0.00672637	Significantly upregulated (Adj-P<0.01)
ENSG00000046651.14_OFD1	OFD1	0.160963	2.78007	3.49914	0.000593655	0.00743703	Significantly upregulated (Adj-P<0.01)
ENSG00000123243.14_ITIH5	ITIH5	0.334249	4.44115	3.55165	0.00049346	0.00646887	Significantly upregulated (Adj-P<0.01)
ENSG00000115419.12_GLS	GLS	0.205413	4.5498	3.55151	0.000493706	0.00646887	Significantly upregulated (Adj-P<0.01)
ENSG00000106991.13_ENG	ENG	0.260269	5.05283	3.55587	0.000486141	0.00638882	Significantly upregulated (Adj-P<0.01)
ENSG00000186187.11_ZNRF1	ZNRF1	-0.145412	5.48411	-3.55595	0.000486012	0.00638882	Significantly downregulated (Adj-P<0.01)
ENSG00000113851.14_CRBN	CRBN	-0.149452	5.06747	-3.55513	0.000487426	0.00639726	Significantly downregulated (Adj-P<0.01)
ENSG00000137509.10_PRCP	PRCP	0.258183	3.06748	3.51225	0.000566992	0.00716015	Significantly upregulated (Adj-P<0.01)
ENSG00000157045.8_NTAN1	NTAN1	0.19666	3.56225	3.53124	0.000530361	0.00684066	Significantly upregulated (Adj-P<0.01)
ENSG00000175376.8_EIF1AD	EIF1AD	-0.132574	3.58242	-3.52595	0.00054032	0.00690079	Significantly downregulated (Adj-P<0.01)
ENSG00000243927.5_MRPS6	MRPS6	-0.229782	4.62249	-3.54839	0.000499185	0.00652662	Significantly downregulated (Adj-P<0.01)
ENSG00000130699.18_TAF4	TAF4	-0.166872	3.75154	-3.52965	0.000533331	0.00685645	Significantly downregulated (Adj-P<0.01)
ENSG00000072786.12_STK10	STK10	0.319057	2.32141	3.47386	0.00064843	0.00790863	Significantly upregulated (Adj-P<0.01)
ENSG00000167178.15_ISLR2	ISLR2	0.442055	0.261142	3.39111	0.000862696	0.00959046	Significantly upregulated (Adj-P<0.01)
ENSG00000273841.4_TAF9	TAF9	0.145155	3.85763	3.52965	0.000533333	0.00685645	Significantly upregulated (Adj-P<0.01)
ENSG00000188010.13_MORN2	MORN2	0.211155	1.75733	3.44549	0.000715524	0.00844479	Significantly upregulated (Adj-P<0.01)
ENSG00000142694.6_EVA1B	EVA1B	0.358493	1.06573	3.42006	0.000781134	0.00901231	Significantly upregulated (Adj-P<0.01)
ENSG00000112379.8_ARFGEF3	ARFGEF3	0.392149	0.151642	3.37806	0.000902006	0.0099207	Significantly upregulated (Adj-P<0.01)
ENSG00000115525.17_ST3GAL5	ST3GAL5	-0.206295	4.00369	-3.52767	0.000537069	0.00687632	Significantly downregulated (Adj-P<0.01)
ENSG00000131876.16_SNRPA1	SNRPA1	-0.133756	3.4473	-3.51405	0.000563419	0.00713225	Significantly downregulated (Adj-P<0.01)
ENSG00000120049.19_KCNIP2	KCNIP2	-0.378274	2.55412	-3.47864	0.000637705	0.00780815	Significantly downregulated (Adj-P<0.01)
ENSG00000144840.9_RABL3	RABL3	-0.172232	4.02733	-3.52663	0.000539036	0.00689588	Significantly downregulated (Adj-P<0.01)
ENSG00000067064.11_IDI1	IDI1	-0.200818	6.05309	-3.53836	0.000517203	0.00672637	Significantly downregulated (Adj-P<0.01)
ENSG00000166266.13_CUL5	CUL5	-0.184892	6.89472	-3.53205	0.000528832	0.00683511	Significantly downregulated (Adj-P<0.01)
ENSG00000143321.18_HDGF	HDGF	-0.126957	7.14015	-3.52787	0.000536678	0.00687632	Significantly downregulated (Adj-P<0.01)
ENSG00000132612.15_VPS4A	VPS4A	-0.138914	6.72982	-3.53179	0.000529319	0.00683511	Significantly downregulated (Adj-P<0.01)
ENSG00000145191.13_EIF2B5	EIF2B5	-0.10401	5.6078	-3.53812	0.000517644	0.00672637	Significantly downregulated (Adj-P<0.01)
ENSG00000006530.16_AGK	AGK	-0.13765	3.28913	-3.49974	0.000592399	0.00742723	Significantly downregulated (Adj-P<0.01)
ENSG00000183684.7_ALYREF	ALYREF	-0.207548	3.71655	-3.51507	0.000561397	0.00712172	Significantly downregulated (Adj-P<0.01)
ENSG00000162889.10_MAPKAPK2	MAPKAPK2	-0.161733	6.81348	-3.52813	0.000536191	0.00687632	Significantly downregulated (Adj-P<0.01)
ENSG00000183137.14_CEP57L1	CEP57L1	0.182701	1.64604	3.42854	0.000758658	0.00885073	Significantly upregulated (Adj-P<0.01)
ENSG00000260285.1_AL133367.1		0.288697	0.625629	3.3919	0.000860357	0.00957658	Significantly upregulated (Adj-P<0.01)
ENSG00000122882.10_ECD	ECD	-0.148432	3.43866	-3.50273	0.000586231	0.00736754	Significantly downregulated (Adj-P<0.01)
ENSG00000213903.8_LTB4R	LTB4R	0.328509	1.55419	3.43017	0.0007544	0.008824	Significantly upregulated (Adj-P<0.01)
ENSG00000187522.15_HSPA14	HSPA14	-0.172354	3.12324	-3.4921	0.000608447	0.00757999	Significantly downregulated (Adj-P<0.01)
ENSG00000143924.18_EML4	EML4	0.238901	2.24971	3.45456	0.000693383	0.00827683	Significantly upregulated (Adj-P<0.01)
ENSG00000131263.12_RLIM	RLIM	-0.16638	4.47624	-3.52808	0.000536293	0.00687632	Significantly downregulated (Adj-P<0.01)
ENSG00000213719.8_CLIC1	CLIC1	0.351065	2.88313	3.4846	0.000624595	0.00771382	Significantly upregulated (Adj-P<0.01)
ENSG00000213020.9_ZNF611	ZNF611	0.218042	1.2804	3.40736	0.000815979	0.00926803	Significantly upregulated (Adj-P<0.01)
ENSG00000109445.10_ZNF330	ZNF330	-0.134545	5.35842	-3.5317	0.000529496	0.00683511	Significantly downregulated (Adj-P<0.01)
ENSG00000162757.4_C1orf74	C1orf74	-0.233958	0.546848	-3.37506	0.000911256	0.00999093	Significantly downregulated (Adj-P<0.01)
ENSG00000013810.18_TACC3	TACC3	0.31635	1.16128	3.40284	0.000828732	0.00934635	Significantly upregulated (Adj-P<0.01)
ENSG00000198205.6_ZXDA	ZXDA	-0.202721	2.39646	-3.44812	0.000709036	0.00841072	Significantly downregulated (Adj-P<0.01)
ENSG00000120729.9_MYOT	MYOT	-0.19645	10.3038	-3.4729	0.000650598	0.00792723	Significantly downregulated (Adj-P<0.01)
ENSG00000160293.16_VAV2	VAV2	0.269803	1.33287	3.40913	0.000811054	0.00923519	Significantly upregulated (Adj-P<0.01)
ENSG00000134108.12_ARL8B	ARL8B	-0.145727	5.61404	-3.52573	0.000540738	0.00690079	Significantly downregulated (Adj-P<0.01)
ENSG00000179832.17_MROH1	MROH1	0.160221	3.68294	3.50456	0.000582483	0.00733093	Significantly upregulated (Adj-P<0.01)
ENSG00000106355.9_LSM5	LSM5	-0.143744	4.06362	-3.51261	0.000566261	0.00715669	Significantly downregulated (Adj-P<0.01)
ENSG00000130935.9_NOL11	NOL11	-0.130823	4.39863	-3.51725	0.000557115	0.007081	Significantly downregulated (Adj-P<0.01)
ENSG00000132622.10_HSPA12B	HSPA12B	0.265056	3.25753	3.48911	0.000614837	0.00764141	Significantly upregulated (Adj-P<0.01)
ENSG00000185305.10_ARL15	ARL15	0.29708	1.67026	3.41431	0.00079673	0.009122	Significantly upregulated (Adj-P<0.01)
ENSG00000120696.8_KBTBD7	KBTBD7	-0.156333	2.75116	-3.4562	0.000689468	0.00824892	Significantly downregulated (Adj-P<0.01)
ENSG00000106546.13_AHR	AHR	0.365066	1.8702	3.42036	0.000780339	0.00901231	Significantly upregulated (Adj-P<0.01)
ENSG00000205730.6_ITPRIPL2	ITPRIPL2	0.171673	4.07764	3.50646	0.000578629	0.00729537	Significantly upregulated (Adj-P<0.01)
ENSG00000186469.8_GNG2	GNG2	0.377241	1.75663	3.41632	0.000791248	0.00908509	Significantly upregulated (Adj-P<0.01)
ENSG00000203791.14_EEF1AKMT2	EEF1AKMT2	-0.165837	2.79481	-3.4603	0.000679722	0.00816968	Significantly downregulated (Adj-P<0.01)
ENSG00000129038.15_LOXL1	LOXL1	0.436237	1.72549	3.42157	0.000777086	0.00900881	Significantly upregulated (Adj-P<0.01)
ENSG00000084207.16_GSTP1	GSTP1	-0.182044	6.21042	-3.51273	0.00056603	0.00715669	Significantly downregulated (Adj-P<0.01)
ENSG00000105974.11_CAV1	CAV1	0.274171	5.75703	3.51493	0.00056168	0.00712172	Significantly upregulated (Adj-P<0.01)
ENSG00000152795.17_HNRNPDL	HNRNPDL	-0.127513	7.59297	-3.50024	0.000591367	0.00742021	Significantly downregulated (Adj-P<0.01)
ENSG00000007255.10_TRAPPC6A	TRAPPC6A	0.294493	2.70714	3.46059	0.00067903	0.00816762	Significantly upregulated (Adj-P<0.01)
ENSG00000113555.5_PCDH12	PCDH12	0.325426	2.22782	3.43501	0.000741904	0.00871436	Significantly upregulated (Adj-P<0.01)
ENSG00000260563.3_AC132872.1		0.29528	0.830472	3.37449	0.000913042	0.00999443	Significantly upregulated (Adj-P<0.01)
ENSG00000111961.17_SASH1	SASH1	0.263551	4.28495	3.50475	0.000582107	0.00733093	Significantly upregulated (Adj-P<0.01)
ENSG00000152818.18_UTRN	UTRN	0.240662	4.81487	3.51007	0.000571336	0.00720921	Significantly upregulated (Adj-P<0.01)
ENSG00000167861.15_HID1	HID1	0.275374	2.09476	3.42843	0.00075894	0.00885073	Significantly upregulated (Adj-P<0.01)
ENSG00000160310.17_PRMT2	PRMT2	0.155351	4.08863	3.49583	0.00060056	0.0074996	Significantly upregulated (Adj-P<0.01)
ENSG00000128590.4_DNAJB9	DNAJB9	-0.15245	4.31259	-3.4967	0.000598742	0.00748284	Significantly downregulated (Adj-P<0.01)
ENSG00000015133.18_CCDC88C	CCDC88C	0.32424	1.5742	3.39752	0.000843987	0.00946223	Significantly upregulated (Adj-P<0.01)
ENSG00000164305.18_CASP3	CASP3	0.188378	3.02921	3.4564	0.000688987	0.00824892	Significantly upregulated (Adj-P<0.01)
ENSG00000111231.8_GPN3	GPN3	-0.12936	4.41095	-3.49524	0.000601808	0.00750921	Significantly downregulated (Adj-P<0.01)
ENSG00000185624.14_P4HB	P4HB	-0.124816	7.534	-3.48503	0.000623658	0.00771379	Significantly downregulated (Adj-P<0.01)
ENSG00000034510.5_TMSB10	TMSB10	0.360694	5.01511	3.49817	0.000595667	0.00745628	Significantly upregulated (Adj-P<0.01)
ENSG00000196154.11_S100A4	S100A4	0.48974	3.8308	3.48021	0.000634226	0.00778377	Significantly upregulated (Adj-P<0.01)
ENSG00000185633.10_NDUFA4L2	NDUFA4L2	0.241876	3.26258	3.46248	0.000674599	0.00813926	Significantly upregulated (Adj-P<0.01)
ENSG00000165898.13_ISCA2	ISCA2	-0.164205	3.95558	-3.47941	0.000636007	0.00779954	Significantly downregulated (Adj-P<0.01)
ENSG00000126216.14_TUBGCP3	TUBGCP3	-0.149971	3.66276	-3.46972	0.000657834	0.00797377	Significantly downregulated (Adj-P<0.01)
ENSG00000085433.15_WDR47	WDR47	-0.199435	4.6064	-3.48699	0.000619403	0.00767991	Significantly downregulated (Adj-P<0.01)
ENSG00000142552.7_RCN3	RCN3	0.314912	2.27055	3.41584	0.000792559	0.00908751	Significantly upregulated (Adj-P<0.01)
ENSG00000165716.10_FAM69B	DIPK1B	0.292176	1.85154	3.40281	0.000828829	0.00934635	Significantly upregulated (Adj-P<0.01)
ENSG00000158435.7_CNOT11	CNOT11	-0.110122	4.29163	-3.48178	0.000630763	0.00775541	Significantly downregulated (Adj-P<0.01)
ENSG00000175806.14_MSRA	MSRA	0.20233	1.89993	3.39673	0.000846258	0.00947263	Significantly upregulated (Adj-P<0.01)
ENSG00000120699.12_EXOSC8	EXOSC8	-0.155435	3.84642	-3.46778	0.000662291	0.00802158	Significantly downregulated (Adj-P<0.01)
ENSG00000159761.14_C16orf86	C16orf86	0.28777	1.83338	3.39373	0.000854986	0.00954365	Significantly upregulated (Adj-P<0.01)
ENSG00000136451.8_VEZF1	VEZF1	-0.15955	5.89008	-3.48702	0.000619344	0.00767991	Significantly downregulated (Adj-P<0.01)
ENSG00000061794.12_MRPS35	MRPS35	-0.153156	5.46707	-3.48759	0.000618108	0.00767598	Significantly downregulated (Adj-P<0.01)
ENSG00000229320.3_KRT8P12	KRT8P12	0.225982	2.14697	3.40385	0.000825879	0.00933898	Significantly upregulated (Adj-P<0.01)
ENSG00000170190.15_SLC16A5	SLC16A5	0.282317	2.04527	3.39835	0.000841572	0.00944257	Significantly upregulated (Adj-P<0.01)
ENSG00000197361.7_FBXL22	FBXL22	0.363583	1.6355	3.38346	0.000885537	0.00978073	Significantly upregulated (Adj-P<0.01)
ENSG00000041802.10_LSG1	LSG1	-0.107686	4.30311	-3.47709	0.000641174	0.0078323	Significantly downregulated (Adj-P<0.01)
ENSG00000113068.9_PFDN1	PFDN1	-0.161213	5.31527	-3.48314	0.000627791	0.00774211	Significantly downregulated (Adj-P<0.01)
[truncated: 90 more rows]
