# Supplementary material for: Metformin alters skeletal muscle transcriptome adaptations to resistance training in older adults
Source: Aging (Albany NY). 2020 Oct 18;12(20):19852–66. doi: 10.18632/aging.104096 (PMC7655218; doi:10.18632/aging.104096)
Supplement: Supplementary Table 2 [file aging-12-104096-s002..xlsx]

## Sheet: plaPRT Pathways
Supplemental Table 2. ConsensusPathdb pathway overrepresentation analysis for differentially expressed genes (DEG)
DEG in plaPRT
Pathways	p-value	q-value	Source	Overlap with Differentially Expressed Genes
Extracellular matrix organization	6.59e-16	9.55e-14	Reactome	MMP14; TGFB1; AGRN; COLGALT1; MMP11; TIMP1; NID2; ITGA1; BGN; HSPG2; PHYKPL; ITGA6; NCSTN; P4HA2; CAPN5; A2M; MFAP2; CTSK; LAMB1; COL3A1; LOX; LAMB2; LUM; TIMP2; PECAM1; LOXL2; LOXL3; LOXL4; ADAMTS2; ASPN; PLOD1; ADAMTS8; HTRA1; CAPN6; NID1; CAPN3; GPR162; KDR; CAPN8; PDGFB; LAMA2; LAMA3; LAMA4; JAM2; JAM3; COL18A1; P4HB; SPARC; COL5A3; COL5A1; COL4A2; COL4A1; COL24A1; LAMC1; COL6A3; F11R; CASP3;…
mRNA Splicing - Major Pathway	3.3e-12	2.39e-10	Reactome	CD2BP2; SRRM2; FUS; SF3A3; SF1; SRSF10; HNRNPH2; CPSF7; CCAR1; GPKOW; CWC22; PRPF6; SRSF5; SRSF7; SRSF6; SRSF1; RBM8A; SRSF3; DDX5; PRPF19; HNRNPR; SNRPA1; PRPF40A; HNRNPL; HNRNPM; CTNNBL1; HNRNPC; HNRNPD; TRA2B; HNRNPA2B1; DHX9; RNPS1; HNRNPA3; HNRNPA1; ALYREF; WBP11; U2AF1L4; PRPF31; POLR2C; CWC15; DDX23; SNRNP40; SRRT; SRSF2; RBMX; UPF3B; LSM5; BUD31; PPIE; XAB2; WBP4
mRNA Splicing	5.7e-12	2.76e-10	Reactome	CD2BP2; SRRM2; FUS; SF3A3; SF1; SRSF10; HNRNPH2; CPSF7; CCAR1; GPKOW; CWC22; PRPF6; SRSF5; SRSF7; SRSF6; SRSF1; RBM8A; SRSF3; DDX5; PRPF19; HNRNPR; SNRPA1; PRPF40A; HNRNPL; HNRNPM; CTNNBL1; HNRNPC; HNRNPD; TRA2B; HNRNPA2B1; DHX9; RNPS1; HNRNPA3; HNRNPA1; ALYREF; WBP11; U2AF1L4; PRPF31; POLR2C; CWC15; DDX23; SNRNP40; SRRT; SRSF2; RBMX; UPF3B; LSM5; RNPC3; BUD31; PPIE; XAB2; WBP4
Collagen formation	3.14e-11	1.14e-09	Reactome	COLGALT1; ITGA6; P4HA2; ADAMTS14; COL3A1; LOX; LOXL2; LOXL3; LOXL4; ADAMTS2; PLOD1; GPR162; LAMA3; COL18A1; P4HB; COL5A2; COL5A3; COL5A1; COL4A2; COL4A1; COL24A1; COL6A3; COL15A1; BMP1; CRTAP; COL1A2; COL1A1; COL6A1; SERPINH1; COL6A2; PPIB; PXDN; COL6A6
Spliceosome - Homo sapiens (human)	4.61e-11	1.34e-09	KEGG	TCERG1; SRSF8; RBMXL1; CTNNBL1; HSPA1A; ZMAT2; SRSF10; PRPF6; SRSF5; SRSF7; SRSF6; DDX39B; RBM8A; SRSF3; SRSF2; PRPF19; PRPF31; PRPF40B; PRPF40A; HNRNPM; SF3A3; HNRNPC; TRA2B; LSM5; HNRNPA1; ALYREF; WBP11; U2AF1L4; SRSF1; CWC15; DDX23; SNRNP40; SNRPA1; SLU7; HNRNPA3; RBMX; DDX5; RBM25; BUD31; PPIE; XAB2
Processing of Capped Intron-Containing Pre-mRNA	2.16e-10	5.22e-09	Reactome	CD2BP2; FUS; SF3A3; SF1; SRSF10; HNRNPH2; CPSF7; CCAR1; GPKOW; CWC22; PRPF6; SRSF5; SRSF7; SRSF6; SRSF1; RBM8A; SRSF3; DDX5; POLDIP3; HNRNPR; SRRT; SNRPA1; PRPF40A; HNRNPL; HNRNPM; CTNNBL1; HNRNPC; HNRNPD; SRSF2; TRA2B; SARNP; DHX9; RNPS1; LSM5; HNRNPA1; ALYREF; WBP11; U2AF1L4; PRPF31; POLR2C; DDX39B; CWC15; DDX23; SNRNP40; NUP54; HNRNPA2B1; SRRM2; SLU7; HNRNPA3; RBMX; UPF3B; PRPF19; METTL14; RNP…
Collagen biosynthesis and modifying enzymes	7.77e-10	1.61e-08	Reactome	COLGALT1; P4HA2; ADAMTS14; COL6A6; COL3A1; ADAMTS2; PLOD1; GPR162; COL18A1; P4HB; COL5A2; COL5A3; COL5A1; COL4A2; COL4A1; COL24A1; SERPINH1; COL15A1; BMP1; COL1A2; COL1A1; COL6A1; COL6A3; COL6A2; PPIB; CRTAP
Signaling by Receptor Tyrosine Kinases	3.85e-06	6.98e-05	Reactome	PLCG1; PDGFRB; COL4A2; POLR2C; PPP2R1A; PAG1; DOCK1; PDGFB; FRS3; NCSTN; SPRY1; AKT3; IRS2; LAMB1; LAMA4; FLT4; LAMB2; IGF2; FGFR4; YES1; CAV1; PGF; ADCYAP1R1; WASF1; THBS4; FYN; ELK1; NRP2; YWHAB; LYN; DUSP6; CDH5; KDR; HNRNPM; ERBB2; SRC; LAMA2; IGF1; NTF4; ELMO1; VRK3; PCSK5; LAMA3; HNRNPA1; SPRED1; VEGFD; FLRT3; SH2B3; COL4A1; HSP90AA1; KITLG; LAMC1; NRP1; MEMO1; YAP1; RBFOX2; PPP2CA; KIT; AT…
ECM-receptor interaction - Homo sapiens (human)	4.37e-06	7.04e-05	KEGG	ITGA1; HSPG2; ITGA6; AGRN; LAMB1; LAMB2; THBS4; GP1BA; SV2B; LAMA2; LAMA3; LAMA4; COL4A2; COL4A1; LAMC1; FN1; SDC4; COL1A2; COL1A1; COL6A1; COL6A3; COL6A2; COL6A6
Metabolism of RNA	1.96e-05	0.000284526	Reactome	SF1; SRSF10; ANP32A; CWC22; PRPF6; DDX39B; PRPF31; WDR61; METTL14; IMP3; SF3A3; PRMT5; RPL14; YWHAB; RPL10; TBL3; RPL19; CWC15; DDX5; SARNP; CD2BP2; FUS; RPL4; EXOSC8; EXOSC2; CCAR1; SRSF5; SRSF7; SRSF6; SRSF1; SRSF3; SRSF2; CTNNBL1; GSPT2; RNPS1; ALYREF; POLR2C; SRRT; RNPC3; BUD31; RPP30; HNRNPH2; GPKOW; RBM8A; PHAX; POLDIP3; HNRNPR; SNRPA1; PRPF40A; TRMT5; HNRNPL; HNRNPM; HNRNPC; HNRNPD; RPS24;…
mRNA Processing	2.25e-05	0.000295998	Wikipathways	CD2BP2; FUS; SRSF10; HNRNPH2; PRPF6; SRSF5; SRSF7; SRSF6; SRSF1; SRSF3; SRSF2; HNRNPR; SNRPA1; PRPF40A; HNRNPL; HNRNPM; SF3A3; TMED10; HNRNPD; TRA2B; HNRNPA2B1; DHX9; HNRNPA1; RNPS1; PRMT1; SFPQ; SNRNP40; HNRNPC; RBMX
Pathways in cancer - Homo sapiens (human)	2.88e-05	0.000347558	KEGG	CSF2RB; CDKN2B; PMAIP1; PDGFRB; CDKN1B; LAMA2; PDGFB; ITGA6; NQO1; FGFR4; PLCG2; PLCG1; IGF1; EDNRB; ELK1; LAMB1; IL3RA; FLT4; KIT; IGF2; FZD10; DLL1; GNAI1; PGF; HEYL; LAMB2; FZD4; FZD6; SKP1; MECOM; LAMA3; GNG11; EML4; GLI3; ETS1; IKBKB; CXCR4; PML; PRKACA; RELA; HEY1; DAPK1; ERBB2; GSTP1; NOS2; TRAF3; TRAF4; CALML6; LAMA4; KIF7; CAMK2A; CAMK2B; VEGFD; PPARD; DLL4; COL4A2; COL4A1; SKP2; KITLG; …
Axon guidance	3.24e-05	0.00036139	Reactome	MYH10; SCN7A; COL4A2; ABLIM3; EPHB3; ITGA1; LYPLA2; DOCK1; SRGAP1; AGRN; MSN; PLCG1; COL6A3; LAMB1; SPTBN1; SEMA6A; PLXNB3; PLXNB1; CACNB3; CACNA1C; FYN; HSP90AA1; SCN2B; YES1; DOK4; CXCR4; PRKACA; LYN; SCN4B; ERBB2; SRC; NGEF; PLXND1; EPHB4; UNC5B; ARPC5; GPC1; FLRT3; EFNA1; COL4A1; ABLIM2; RHOC; LAMC1; SHANK3; NRP1; NRP2; CACNA1S; SEMA5A; ST8SIA4; IRS2; ARHGEF28; ANK2; GRB2; SCN1B; GIT1; COL6A1…
VEGFA-VEGFR2 Signaling Pathway	5.05e-05	0.000523476	Wikipathways	MMP14; NFATC1; HDAC5; KCNC3; PLCG1; ERG; MYL2; MAPK12; MAPKAPK5; HSPA1A; CAV1; PGF; WASF1; ELK1; MMRN2; FYN; ETS1; SHB; RELA; CDH5; KDR; YWHAE; SRC; ARHGEF15; ACACB; NR4A1; GPC1; PTPN9; DLL4; IGFBP7; RHOC; NRP2; GJA1; F3; RHOJ; NOTCH4; AFDN; MYO6; CBL; KL; GRB2; NCL; HSP90AA1; MMP2
Degradation of the extracellular matrix	0.000109408	0.00105761	Reactome	MMP14; MMP11; TIMP1; HSPG2; NCSTN; CAPN5; LAMB1; A2M; TIMP2; ADAMTS4; ADAMTS8; HTRA1; CAPN6; NID1; CAPN3; CAPN8; PHYKPL; LAMA3; COL18A1; CTSK; LAMC1; CASP3; BMP1; MMP2
Small cell lung cancer - Homo sapiens (human)	0.00012232	0.00110852	KEGG	FHIT; CDKN1B; LAMA2; ITGA6; IKBKB; LAMA3; LAMB1; TRAF4; LAMB2; SKP2; RELA; CDKN2B; NOS2; TRAF3; LAMA4; COL4A2; COL4A1; LAMC1; CASP3; FN1; AKT3; CDK6
Focal adhesion - Homo sapiens (human)	0.000205924	0.00175641	KEGG	PDGFRB; ITGA1; DOCK1; LAMA2; ITGA6; AKT3; MYL2; LAMB1; FLT4; LAMB2; CAV3; CAV1; PGF; THBS4; FYN; ELK1; PARVA; KDR; ERBB2; SRC; PDGFB; LAMA3; LAMA4; MYLK2; VEGFD; COL4A2; COL4A1; LAMC1; FN1; GRB2; COL1A2; IGF1; COL1A1; COL6A1; COL6A3; COL6A2; COL6A6
Focal Adhesion	0.000390006	0.00314171	Wikipathways	PDGFRB; ITGA1; DOCK1; LAMA2; ITGA6; LAMA3; MYL2; LAMB1; LAMB2; CAV3; CAV1; PGF; ELK1; THBS4; FYN; GRB2; PARVA; KDR; ERBB2; SRC; PDGFB; IGF1; LAMA4; MYLK2; COL5A2; VEGFD; COL4A2; COL4A1; LAMC1; TNK2; FN1; COL5A3; AKT3; COL1A2; COL1A1; COL6A2
p75 NTR receptor-mediated signalling	0.000540736	0.00412667	Reactome	ARHGEF10; PLEKHG2; HDAC3; MYD88; NGEF; RASGRF2; ECT2; ARHGEF17; RTN4; PLEKHG5; MCF2L; ARHGEF26; IKBKB; CASP3; NGFR; YWHAE; BEX3; RELA; IRAK1; NCSTN; ARHGEF15
Focal Adhesion-PI3K-Akt-mTOR-signaling pathway	0.000643259	0.00466363	Wikipathways	PPP2R1A; PIK3C2B; PDGFRB; CDKN1B; STK11; LAMA2; ITGA6; IKBKB; AKT3; NGFR; LAMB1; COL3A1; FLT4; LAMB2; KITLG; PGF; TEK; LAMA3; GNG11; COL1A2; KDR; NOS1; PDGFB; IGF1; LAMA4; EFNA1; COL5A2; VEGFD; COL5A1; IL3RA; COL4A2; COL4A1; FGFR4; LAMC1; ITGAX; FN1; COL5A3; PPP2CA; IRS2; KIT; F2R; GRB2; GNG2; COL1A1; HSP90AA1; COL6A2; LPAR6; THBS4; NOS2
PI3K-Akt signaling pathway - Homo sapiens (human)	0.000845878	0.00584059	KEGG	IGF2; PDGFRB; CDKN1B; STK11; LAMA2; ITGA6; PPP2R1A; AKT3; NGFR; LAMB1; LAMA4; FLT4; LAMB2; FGFR4; PGF; TEK; THBS4; GNG11; MTCP1; PIK3R6; ITGA1; YWHAB; COL1A2; RELA; KDR; YWHAE; ERBB2; PDGFB; IGF1; NTF4; LAMA3; PKN3; NR4A1; EFNA1; VEGFD; IL3RA; COL4A2; COL4A1; KITLG; LAMC1; IKBKB; FN1; PPP2CA; KIT; F2R; GRB2; GNG2; CDK6; COL1A1; COL6A1; HSP90AA1; COL6A3; COL6A2; LPAR6; COL6A6
Ras signaling pathway - Homo sapiens (human)	0.00208601	0.0134105	KEGG	PDGFRB; PLCG2; IKBKB; RAPGEF5; PLCG1; AKT3; NGFR; ELK1; FLT4; KITLG; PGF; TEK; RGL1; GNG11; ETS1; PRKACA; RELA; KDR; IGF2; PDGFB; IGF1; NTF4; EFNA1; SYNGAP1; VEGFD; PLA2G4B; FGFR4; RASA3; RASAL3; RASGRF2; PLD2; HTR7; AFDN; CALML6; KIT; GRB2; GNG2; RALB
MAPK signaling pathway - Homo sapiens (human)	0.00212718	0.0134105	KEGG	PDGFRB; MAP4K2; MAP4K4; MAPKAPK5; NFATC1; MKNK2; TGFB1; IKBKB; CACNA1S; HSPA1A; AKT3; NGFR; MAPK12; ARRB1; FLT4; IGF2; KITLG; PGF; TEK; MECOM; CACNA1C; ELK1; RELA; IRAK1; KDR; ERBB2; PDGFB; IGF1; NTF4; CDC25B; NR4A1; EFNA1; VEGFD; PLA2G4B; FGFR4; MYD88; CASP3; RASGRF2; DUSP6; KIT; CACNB3; MAP3K12; GRB2; PRKACA; CACNG1; PPP3CB
Adrenergic signaling in cardiomyocytes - Homo sapiens (human)	0.00261953	0.0158263	KEGG	SCN7A; CACNA1C; PPP2R1A; AKT3; MYL2; TNNC1; MAPK12; GNAI1; PPP1R1A; CACNB3; TPM4; PIK3R6; PRKACA; CACNA1S; CAMK2A; CAMK2B; PLN; ATP2B4; ADCY4; ADCY7; PPP2CA; CALML6; SCN4B; ATP1A4; SCN1B; CACNG1
Relaxin signaling pathway - Homo sapiens (human)	0.00277843	0.0161149	KEGG	TGFB1; NOS1; GNAO1; AKT3; MAPK12; ARRB1; COL3A1; EDNRB; GNAI1; GNG11; COL1A2; RELA; SRC; NOS2; VEGFD; COL4A2; COL4A1; PRKACA; ADCY4; ADCY7; GRB2; GNG2; COL1A1; MMP2
Rho GTPase cycle	0.00364326	0.0203182	Reactome	STARD13; SRGAP1; CHN1; A2M; ARAP3; ECT2; ARHGAP27; ARHGDIB; DLC1; ARHGEF10; NGEF; ARHGEF15; ARHGEF17; RHOJ; RHOBTB2; RHOC; GDI1; PLEKHG2; RASGRF2; PLEKHG5; MCF2L; ARHGAP31; ARHGAP10; ARHGAP39; ARHGEF26
PI3K-Akt Signaling Pathway	0.00448065	0.0240628	Wikipathways	PPP2R1A; PDGFRB; ITGA1; STK11; LAMA2; ITGA6; IKBKB; AKT3; NGFR; LAMB1; LAMA4; FLT4; LAMB2; KITLG; PGF; TEK; LAMA3; GNG11; PIK3R6; CDKN1B; COL1A2; RELA; KDR; IGF2; PDGFB; IGF1; NTF4; PKN3; EFNA1; VEGFD; IL3RA; COL4A2; COL4A1; FGFR4; LAMC1; FN1; PPP2CA; KIT; F2R; GRB2; GNG2; CDK6; COL1A1; COL6A1; HSP90AA1; COL6A3; COL6A2; LPAR6; THBS4; COL6A6
Epithelial to mesenchymal transition in colorectal cancer	0.00574709	0.0297617	Wikipathways	TGFB1; PKP1; TUSC3; AKT3; DLK1; MAPK12; FZD10; FZD4; FZD6; CLDN15; SPARC; CLDN5; DLL1; DLL4; COL4A2; COL4A1; SNAI2; NRP2; TJP1; FN1; NOTCH4; ID2; NOTCH1; NOTCH3; GRB2; MMP2; WNT11
Death Receptor Signalling	0.00609143	0.029927	Reactome	HDAC3; NCSTN; IKBKB; NGFR; TNFRSF10D; BEX3; USP21; ECT2; CLIP3; RELA; MYD88; YWHAE; ARHGEF10; NGEF; ARHGEF15; ARHGEF17; RTN4; PLEKHG2; IRAK1; CASP3; RASGRF2; PLEKHG5; MCF2L; ARHGEF26
Ras Signaling	0.0062091	0.029927	Wikipathways	PDGFRB; IKBKB; PLCG2; PLCG1; AKT3; NGFR; ELK1; FLT4; RASAL3; TEK; RGL1; GNG11; ETS1; PRKACA; RELA; KDR; SYNGAP1; HTR7; PLA2G4B; FGFR4; RASA3; RASGRF2; PLD2; RAPGEF5; AFDN; CALML6; KIT; GRB2; GNG2; RALB
Metabolism of proteins	0.0065956	0.029927	Reactome	TRAPPC2L; RPN1; DHDDS; UBE2Q2; MFGE8; TUSC3; SUMO3; HIST1H4H; GRPEL2; SRP9; DOLPP1; MTCP1; ACHE; AGT; SLC25A12; USP21; TMED10; KARS; ADAMTS4; ADAMTS7; HSPA5; B3GNT2; ADAMTS2; ASB8; EIF3D; ADAMTS8; N6AMT1; MRPL50; NAPA; THY1; WDR61; RNF135; ST6GALNAC6; COG1; VWA1; RPL14; GNAZ; KLHL5; RPL10; SEC24C; RPL19; SOCS5; PCGF2; FN1; RNF185; PSMC4; EEF1D; TRAPPC4; FBXL7; MRPL42; L3MBTL2; GNG2; RAB43; MRPL49…
Diseases of signal transduction	0.00660457	0.029927	Reactome	PDGFRB; HDAC3; HDAC5; TGFB1; CDKN1B; NCSTN; PLCG1; AKT3; IRS2; ARRB1; CPSF6; KIT; KITLG; PAPSS1; HEYL; FYN; DERL2; YWHAB; ERBB2; SRC; PDGFB; NR4A1; NEURL1B; VCP; DLL1; DLL4; FGFR4; HEY1; LRRFIP1; FN1; FXR1; NOTCH1; CBL; KL; MAMLD1; GRB2; FKBP1A; HSP90AA1
Proteoglycans in cancer - Homo sapiens (human)	0.0069004	0.0303199	KEGG	TGFB1; HSPG2; PLCG2; PLCG1; AKT3; MAPK12; FZD10; IGF2; CAV3; CAV1; FZD4; FZD6; LUM; ELK1; KDR; ERBB2; SRC; IGF1; CAMK2A; CAMK2B; GPC1; CASP3; FN1; MSN; SDC4; CBL; DDX5; ANK2; GRB2; PRKACA; MMP2; WNT11
Human papillomavirus infection - Homo sapiens (human)	0.00716355	0.0305504	KEGG	PDGFRB; HDAC3; HDAC5; PPP2R1A; CDKN1B; ITGA6; IKBKB; AKT3; LAMB1; FZD10; LAMB2; HEYL; FZD4; FZD6; LAMA3; ITGA1; COL1A2; RELA; LFNG; PKM; ATP6V0C; LAMA2; TRAF3; LAMA4; CDK6; COL4A2; COL4A1; PSMC1; LAMC1; HEY1; CASP3; FN1; NOTCH4; EIF2AK2; ATP6V1E1; NOTCH1; NOTCH3; PPP2CA; GRB2; PRKACA; ATP6V1G1; COL1A1; COL6A1; ATP6V0E1; COL6A3; COL6A2; THBS4; WNT11; COL6A6
Vesicle-mediated transport	0.00738618	0.0305999	Reactome	TRAPPC2L; SNX2; COL1A1; DENND5A; NECAP1; SEC24C; ARF3; VAMP2; KIF26A; TRAPPC4; DENND6B; AKT3; ARFGAP2; RIN3; ARRB1; COL3A1; HIP1; CHMP6; SPTBN1; HIP1R; COPZ1; VPS45; UBAP1; DENND2A; FZD4; RAB32; BLOC1S1; RAB30; AP4S1; TXNDC5; ARF1; GPS1; SYS1; GABARAP; SPARC; SYT11; NAPA; YWHAB; COLEC12; RAB13; TMED10; LMAN2L; YWHAE; KIF3C; SRC; RABGEF1; GJA1; RAB1A; COG1; RAB1B; ARPC5; APOE; USO1; COL4A2; COL4A1…
Regulation of Insulin-like Growth Factor (IGF) transport and uptake by Insulin-like Growth Factor Binding Proteins (IGFBPs)	0.00801685	0.0315772	Reactome	TIMP1; ENAM; LAMB1; LAMB2; TMEM132A; APOE; MFGE8; IGF2; IGF1; P4HB; CHRDL1; VWA1; IGFBP2; IGFBP3; IGFBP7; IGFBP4; MXRA8; LAMC1; FN1; APP; MMP2; CKAP4
Glycosaminoglycan metabolism	0.00836967	0.0315772	Reactome	PAPSS1; CHST11; HSPG2; EXT2; EXT1; OMD; HYAL2; SDC3; SDC4; CHSY3; CSGALNACT1; IDS; AGRN; GPC1; OGN; BGN; CHST1; B3GNT2; CHST2; LUM; CHST14
MAPK family signaling cascades	0.0086229	0.0315772	Reactome	CSF2RB; PDGFRB; PPP2R1A; SPRED1; FRS3; ARRB1; RASAL3; KIT; MAPKAPK5; SPTBN1; TEK; FYN; PEA15; YWHAB; DUSP6; ERBB2; SRC; PDGFB; FN1; CAMK2A; CDC42EP5; SYNGAP1; IL3RA; CAMK2B; FGFR4; RASA3; KITLG; ETV4; RASGRF2; PPP2CA; IRS2; KL; CDK1; GRB2; PRKACA; MMP2
Protein processing in endoplasmic reticulum - Homo sapiens (human)	0.00867704	0.0315772	KEGG	RPN1; HSPA5; TUSC3; CRYAB; HSPA1A; SVIP; TXNDC5; XBP1; SKP1; UBQLN2; DNAJB2; DERL1; DERL2; UBE2G2; RRBP1; NSFL1C; P4HB; PDIA4; VCP; SEC24C; SIL1; RNF185; DNAJC5; EIF2AK2; PPP1R15A; HSP90AA1; CKAP4
Leukocyte transendothelial migration - Homo sapiens (human)	0.00871095	0.0315772	KEGG	MSN; PECAM1; SIPA1; ESAM; JAM2; CLDN15; CDH5; AFDN; JAM3; PLCG2; PLCG1; MYL2; MAPK12; CXCR4; THY1; CTNNA3; MMP2; CLDN5; F11R; GNAI1
Toxoplasmosis - Homo sapiens (human)	0.00960275	0.033961	KEGG	TGFB1; NOS2; MYD88; LAMA4; CASP3; GNAO1; LAMA3; LAMA2; ITGA6; IKBKB; PIK3R6; HSPA1A; AKT3; MAPK12; LAMB1; LAMB2; RELA; IRAK1; LAMC1; GNAI1

## Sheet: metPRT Pathways
DEG in metPRT
Pathways	p-value	q-value	Source	Overlap with Differentially Expressed Genes
Extracellular matrix organization	1.96e-15	3.88e-13	Reactome	MMP14; TGFB1; COLGALT1; NID2; HSPG2; PDGFB; BGN; NCSTN; AGRN; ITGA10; TGFB3; A2M; MFAP2; CTSK; LAMB1; COL3A1; LOX; LAMB2; SERPINE1; PECAM1; LOXL2; LOXL3; LOXL4; ADAMTS2; ASPN; ADAMTS8; LUM; CAPN6; NID1; CAPN3; P3H1; HTRA1; PHYKPL; LAMA3; LAMA4; LOXL1; COL18A1; P4HB; COL5A2; COL5A1; COL4A2; COL4A1; COL24A1; LAMC1; ADAM15; COL6A3; COL15A1; NCAM1; CASP3; BMP1; SPARC; COL14A1; ADAMTS14; CRTAP; COL1A2…
Collagen formation	9.74e-14	9.64e-12	Reactome	COLGALT1; ADAMTS14; COL3A1; LOX; LOXL1; LOXL2; LOXL3; LOXL4; ADAMTS2; P3H1; LAMA3; COL18A1; P4HB; COL5A2; COL5A1; COL4A2; COL4A1; COL24A1; COL6A3; COL15A1; BMP1; COL14A1; CRTAP; COL1A2; COL1A1; COL6A1; SERPINH1; COL6A2; PPIB; PXDN; COL6A6
Collagen biosynthesis and modifying enzymes	1.97e-11	1.3e-09	Reactome	COLGALT1; ADAMTS14; COL6A6; COL3A1; ADAMTS2; P3H1; COL18A1; P4HB; COL5A2; COL5A1; COL4A2; COL4A1; COL24A1; SERPINH1; COL15A1; BMP1; COL14A1; COL1A2; COL1A1; COL6A1; COL6A3; COL6A2; PPIB; CRTAP
Assembly of collagen fibrils and other multimeric structures	1.15e-07	5.67e-06	Reactome	COL15A1; LOXL2; LOXL3; LOXL4; BMP1; LOXL1; COL18A1; LAMA3; COL4A2; COL4A1; COL6A1; COL6A3; COL6A2; LOX; PXDN; COL6A6
Collagen chain trimerization	2.04e-07	8.07e-06	Reactome	COL15A1; COL18A1; COL14A1; COL5A2; COL5A1; COL3A1; COL1A2; COL4A2; COL4A1; COL1A1; COL6A1; COL24A1; COL6A3; COL6A2; COL6A6
O-glycosylation of TSR domain-containing proteins	2.49e-07	8.23e-06	Reactome	SSPO; SPON1; THSD7A; SEMA5A; ADAMTSL4; ADAMTS2; ADAMTS8; THSD1; ADAMTS10; ADAMTS13; ADAMTS12; ADAMTS15; ADAMTS14; ADAMTS7
ECM proteoglycans	8.06e-06	0.000228095	Reactome	TGFB1; TGFB3; LAMA4; ASPN; HSPG2; BGN; SERPINE1; AGRN; SPARC; LAMA3; NCAM1; LAMC1; LAMB1; LAMB2; LUM
ECM-receptor interaction - Homo sapiens (human)	1.63e-05	0.00038042	KEGG	LAMA3; LAMA4; THBS4; HSPG2; LAMC1; THBS3; AGRN; LAMB1; ITGA10; COL1A2; COL4A2; COL4A1; COL1A1; COL6A1; LAMB2; COL6A3; COL6A2; COL6A6
Protein digestion and absorption - Homo sapiens (human)	1.73e-05	0.00038042	KEGG	COL15A1; PRCP; ELN; COL18A1; COL1A1; COL14A1; ATP1B3; COL5A2; COL5A1; COL1A2; COL4A2; COL4A1; COL3A1; COL6A1; COL24A1; COL6A3; COL6A2; SLC8A3; COL6A6
Focal adhesion - Homo sapiens (human)	3.55e-05	0.000703126	KEGG	PDGFRB; CRKL; ITGA10; AKT3; LAMB1; LAMB2; RAF1; CAV3; CAV1; THBS4; THBS3; ELK1; PIK3R3; PARVA; PDGFB; LAMA3; LAMA4; RAC1; MYLK2; COL4A2; COL4A1; LAMC1; VAV2; BAD; MYL5; COL1A2; COL1A1; COL6A1; COL6A3; COL6A2; COL6A6
Degradation of the extracellular matrix	5.07e-05	0.000911759	Reactome	MMP14; PHYKPL; LAMA3; CASP3; BMP1; COL18A1; HSPG2; COL14A1; ADAMTS8; NCSTN; CAPN6; NID1; CTSK; A2M; ADAM15; LAMB1; CAPN3; LAMC1; MMP2; HTRA1
Neddylation	6.53e-05	0.00106073	Reactome	ASB11; PSMD4; PSMD7; PSMD1; PSMD3; PSMD2; PSMD13; KBTBD7; ASB4; SKP1; ASB8; PSMA2; FBXW9; FBXO21; WSB2; COPS3; NAE1; PSMC2; PSMC3; FEM1A; PSMA4; NUB1; DCUN1D2; CUL5; CCDC8; SOCS5; FBXL22; WDTC1; ASB5; FBXL7; KLHL42; FBXO31; PSMB2; PSMB1
AGE-RAGE signaling pathway in diabetic complications - Homo sapiens (human)	6.96e-05	0.00106073	KEGG	TGFB1; NFATC1; TGFB3; COL4A1; RAC1; CDKN1B; COL1A2; MAPK14; STAT5B; PLCG1; AKT3; PIK3R3; COL4A2; MAPK12; COL1A1; COL3A1; MMP2; SERPINE1; CASP3
Focal Adhesion	7.98e-05	0.00112901	Wikipathways	PDGFRB; CRKL; BAD; AKT3; LAMB1; LAMB2; RAF1; CAV3; CAV1; THBS4; THBS3; ELK1; PIK3R3; PARVA; PDGFB; LAMA3; LAMA4; RAC1; MYLK2; COL5A2; COL4A2; COL4A1; LAMC1; TNK2; VAV2; ITGA10; MYL5; COL1A2; COL1A1; COL6A2
Post-translational protein modification	9.05e-05	0.00118387	Reactome	ASB11; TUSC3; HIST1H4H; ARCN1; SAR1B; TMED10; ADAMTS7; ASB4; ASB5; ASB8; ADAMTS8; CUL5; THY1; SOCS5; NUP98; COG1; UBE2R2; VWA1; METTL22; USP30; UBE2V2; TRAPPC9; WDTC1; APP; FBXL7; COPS3; ENAM; UBE2L3; LAMB1; LAMB2; TMEM132A; XRCC4; KBTBD7; CHD3; TTLL3; ADAMTSL4; TRAPPC6A; TUBA1A; CBX2; DERL1; GMDS; WSB2; TOP2A; RAB7A; THSD1; IGFBP3; DCUN1D2; IGFBP7; F10; LAMC1; EEF1AKMT2; UBE2I; UBE2K; SEMA5A; UB…
Small cell lung cancer - Homo sapiens (human)	9.57e-05	0.00118387	KEGG	CDK6; LAMA3; LAMA4; FHIT; E2F1; CDKN1B; CCNE1; CASP3; IKBKB; LAMC1; AKT3; PIK3R3; COL4A2; COL4A1; GADD45A; LAMB1; LAMB2; TRAF5
Platelet activation, signaling and aggregation	0.000110989	0.0012927	Reactome	TGFB1; TGFB3; APP; TMSB4X; MAPK14; A2M; ITIH3; RAF1; SERPINE1; GNAI1; PECAM1; FAM49B; GNG11; ITIH4; PIK3R6; SPARC; PIK3R3; TAGLN2; DGKG; IGF2; PDGFB; RAC1; GNB4; FERMT3; LAMP2; ITPR1; HABP4; ENDOD1; CD109; VAV2; F2R; GNA14; GNG2; VTI1B; TOR4A; MAGED2
Platelet degranulation	0.000123486	0.00135835	Reactome	TGFB1; TGFB3; APP; TMSB4X; HABP4; ITIH3; SERPINE1; PECAM1; A2M; SPARC; TAGLN2; IGF2; PDGFB; ITIH4; FAM49B; FERMT3; LAMP2; ENDOD1; MAGED2; VTI1B; TOR4A; CD109
p75 NTR receptor-mediated signalling	0.000146401	0.00147622	Reactome	PLEKHG2; ARHGEF37; VAV2; BEX3; ARHGEF15; ECT2; ARHGEF17; RTN4; RAC1; ARHGEF2; MCF2L; NCSTN; IKBKB; CASP3; BAD; PLEKHG5; IRAK1; YWHAE
mRNA Splicing	0.000152722	0.00147622	Reactome	SF3A3; HNRNPH2; GPKOW; PRPF6; SRSF7; SRSF1; RBM8A; SRSF3; SRSF2; HNRNPR; SNRPA1; HNRNPL; HNRNPM; LSM5; HNRNPC; HNRNPD; HNRNPA2B1; DHX9; HNRNPA3; PCBP1; ALYREF; WBP11; POLR2C; DDX23; SNW1; SNRNP48; CSTF2T; RBMX
Rho GTPase cycle	0.000156568	0.00147622	Reactome	ARHGAP10; SRGAP2; CHN1; A2M; ARAP3; ECT2; RAC1; ARHGEF2; ARHGAP22; ARHGAP27; ARHGEF37; ARHGEF15; ARHGEF17; RHOJ; RHOBTB2; RHOC; RHOD; PLEKHG2; PLEKHG5; VAV2; MCF2L; ARHGAP36; ARHGAP39
mRNA Splicing - Major Pathway	0.000175062	0.00151986	Reactome	SF3A3; HNRNPH2; GPKOW; PRPF6; SRSF7; SRSF1; RBM8A; SRSF3; SRSF2; HNRNPR; SNRPA1; HNRNPL; HNRNPM; LSM5; HNRNPC; HNRNPD; HNRNPA2B1; DHX9; HNRNPA3; PCBP1; ALYREF; WBP11; POLR2C; DDX23; SNW1; CSTF2T; RBMX
MAPK Signaling Pathway	0.000176549	0.00151986	Wikipathways	TGFB1; NFATC3; CRKL; PDGFRB; MKNK2; IKBKB; TGFB3; MAPK12; RAF1; MAPKAPK2; CACNB3; GADD45A; MAP3K6; ELK1; RRAS; DUSP1; PDGFB; NTF3; RAC1; CDC25B; NR4A1; MAP4K2; FGFR4; MAPK8IP1; MAPK14; CASP3; CACNG8; MAP3K12; AKT3; CACNA1A; NFATC1; CACNG1; PPP3CB; LAMTOR3
Cellular senescence - Homo sapiens (human)	0.000187491	0.0015468	KEGG	TGFB1; NFATC3; NFATC1; LIN37; RRAS; AKT3; MAPK12; VDAC1; RAF1; MAPKAPK2; GADD45A; CCNE1; SERPINE1; PIK3R3; IGFBP3; ITPR1; MAPK14; PPID; E2F1; CALML6; CDK1; CDK6; PPP3CB; RHEB; TGFB3
Response to elevated platelet cytosolic Ca2+	0.000217928	0.00172599	Reactome	TGFB1; TGFB3; APP; TMSB4X; HABP4; ITIH3; SERPINE1; PECAM1; A2M; SPARC; TAGLN2; IGF2; PDGFB; ITIH4; FAM49B; FERMT3; LAMP2; ENDOD1; MAGED2; VTI1B; TOR4A; CD109
mRNA Processing	0.000271699	0.00206909	Wikipathways	DHX9; SRSF7; HNRNPC; SRSF1; SRSF3; SRSF2; PRMT2; HNRNPA2B1; HNRNPR; SF3A3; CSTF2T; SNRPA1; RBMX; SPOP; SFPQ; HNRNPL; HNRNPM; HNRNPH2; PRPF6; HNRNPD; TMED10
Cell death signalling via NRAGE, NRIF and NADE	0.000286474	0.00210081	Reactome	PLEKHG2; ARHGEF37; BEX3; ARHGEF15; ECT2; ARHGEF17; VAV2; ARHGEF2; CASP3; NCSTN; BAD; MCF2L; RAC1; PLEKHG5; YWHAE
Neurotrophin signaling pathway - Homo sapiens (human)	0.000301948	0.0021352	KEGG	MAPK14; NTF3; BEX3; CRKL; RAC1; CAMK2G; PLCG1; CAMK2A; IKBKB; BAD; AKT3; PIK3R3; SH2B3; MAPK12; ZNF274; CALML6; IRAK1; RAF1; MAPKAPK2; YWHAE
Signaling by Receptor Tyrosine Kinases	0.000339277	0.00231644	Reactome	PDGFRB; COL4A2; POLR2C; CRKL; PPP2R1A; PAG1; SPRED1; NCSTN; MAPK14; PLCG1; AKT3; LAMB1; LAMB2; MAPKAPK2; CAV1; FGFRL1; LAMC1; THBS4; THBS3; JUP; PIK3R3; HNRNPM; YWHAB; CUL5; CDH5; IGF2; ATP6V0C; PDGFB; NTF3; LAMA4; VRK3; RAC1; PCSK5; LAMA3; RNF41; SHB; SH2B3; COL4A1; FGFR4; ITPR1; RBFOX2; VAV2; FLRT3; STAT5B; ELK1; ATP6V1G1; COL6A1; COL6A3; COL6A2; COL6A6
PI3K-Akt signaling pathway - Homo sapiens (human)	0.000462131	0.00305006	KEGG	PDGFRB; PPP2R1A; CDKN1B; GNG11; IKBKB; BAD; AKT3; LAMB1; LAMB2; RAF1; THBS4; CCNE1; THBS3; PIK3R6; PIK3R3; GNB4; YWHAB; COL1A2; YWHAE; IGF2; PDGFB; NTF3; LAMA4; RAC1; LAMA3; NR4A1; EFNA1; COL4A2; COL4A1; FGFR4; LAMC1; RHEB; ITGA10; CSF3; F2R; GNG2; CDK6; COL1A1; COL6A1; COL6A3; COL6A2; LPAR6; COL6A6
Parkin-Ubiquitin Proteasomal System pathway	0.000613642	0.00391939	Wikipathways	SNCAIP; HSPA14; PSMD4; PSMD7; CCNE1; PSMD1; PSMD3; PSMD2; PSMD13; UBE2G2; PSMC2; PSMC3; TUBA1A; UBE2L3
MAPK signaling pathway - Homo sapiens (human)	0.000650363	0.00402412	KEGG	PDGFRB; NFATC3; CRKL; NFATC1; MKNK2; MAPK14; AKT3; MAPK12; RAF1; MAPKAPK2; CACNB3; CACNA1A; MAP3K6; IKBKB; IRAK1; DUSP1; TGFB1; PDGFB; NTF3; RAC1; CDC25B; NR4A1; MAP4K2; EFNA1; FGFR4; MAPK8IP1; RRAS; CASP3; CACNG8; MAP3K12; ELK1; GADD45A; CACNG1; PPP3CB; LAMTOR3; TGFB3; IGF2
Pathways in cancer - Homo sapiens (human)	0.000707861	0.00424716	KEGG	PDGFRB; TGFB3; CRKL; TGFB1; CDKN1B; NQO1; IKBKB; BAD; AKT3; LAMB1; EDNRB; LAMB2; RAF1; GNAI1; HEYL; CALML6; SKP1; GADD45A; CCNE1; GNG11; EML4; JUP; ELK1; PIK3R3; GNB4; DAPK1; STAT5B; IGF2; PDGFB; LAMA3; LAMA4; TRAF5; RAC1; KIF7; CAMK2G; CAMK2A; DLL4; COL4A2; COL4A1; FGFR4; LAMC1; HEY1; ADCY7; CASP3; E2F1; PLEKHG5; NOTCH4; LPAR6; PLCG1; NOTCH3; F2R; GSTP1; RUNX1; GNG2; CDK6; MMP2; WNT11; PLD1
Kaposi sarcoma-associated herpesvirus infection - Homo sapiens (human)	0.000826139	0.00479887	KEGG	NFATC1; NFATC3; MAPK14; PLCG1; AKT3; MAPK12; RAF1; MAPKAPK2; GNG11; PIK3R6; PIK3R3; C3; PDGFB; RAC1; GNB4; ITPR1; IKBKB; IRF7; CASP3; E2F1; CLEC2B; CALML6; ZFP36; GNG2; CDK6; PPP3CB
Death Receptor Signalling	0.000848284	0.00479887	Reactome	PLEKHG2; IKBKB; RIPK1; VAV2; BEX3; ARHGEF15; ECT2; RAC1; RTN4; ARHGEF37; ARHGEF17; ARHGEF2; MCF2L; NCSTN; CLIP3; CASP3; BAD; SMPD3; PLEKHG5; IRAK1; YWHAE
Chronic myeloid leukemia - Homo sapiens (human)	0.000932697	0.00512983	KEGG	TGFB1; TGFB3; CRKL; E2F1; CDKN1B; IKBKB; STAT5B; BAD; AKT3; PIK3R3; CDK6; GADD45A; RAF1; RUNX1
Processing of Capped Intron-Containing Pre-mRNA	0.00106839	0.00571735	Reactome	HNRNPH2; GPKOW; PRPF6; SRSF7; SRSF1; RBM8A; SRSF3; SRSF2; POLDIP3; HNRNPR; SNRPA1; HNRNPL; HNRNPM; PCBP1; HNRNPC; HNRNPD; HNRNPA2B1; DHX9; NUP98; LSM5; SF3A3; ALYREF; WBP11; POLR2C; DDX23; SNW1; SNRNP48; CSTF2T; SLU7; HNRNPA3; RBMX
Amoebiasis - Homo sapiens (human)	0.0011458	0.00597023	KEGG	TGFB1; RAB7A; LAMA3; LAMA4; CASP3; LAMC1; GNA14; PIK3R3; COL1A2; COL4A2; COL4A1; COL1A1; LAMB1; COL3A1; LAMB2; TGFB3
G alpha (12/13) signalling events	0.00126496	0.00642209	Reactome	PLEKHG2; ARHGEF37; VAV2; ARHGEF15; ECT2; ARHGEF17; GNB4; RAC1; ARHGEF2; MCF2L; GNG11; GNG2; PLEKHG5; RHOC; PIK3R3
Human immunodeficiency virus 1 infection - Homo sapiens (human)	0.00130018	0.00642868	KEGG	NFATC1; NFATC3; CRKL; GNAO1; CALML6; RIPK1; PLCG1; AKT3; MAPK12; RAF1; GNAI1; SKP1; GNG11; PIK3R3; IKBKB; CUL5; IRAK1; TRAF5; RAC1; GNB4; ITPR1; MAPK14; CASP3; AP1G2; BAD; CDK1; GNG2; PPP3CB
PI3K-Akt Signaling Pathway	0.00133119	0.00642868	Wikipathways	PPP2R1A; PDGFRB; CDKN1B; GNG11; IKBKB; ITGA10; AKT3; LAMB1; LAMB2; RAF1; LAMA3; CCNE1; THBS3; PIK3R6; PIK3R3; COL1A2; IGF2; PDGFB; NTF3; LAMA4; RAC1; GNB4; EFNA1; COL4A2; COL4A1; FGFR4; LAMC1; RHEB; BAD; CSF3; F2R; GNG2; CDK6; COL1A1; COL6A1; COL6A3; COL6A2; LPAR6; THBS4; COL6A6
Spliceosome - Homo sapiens (human)	0.00142235	0.00670535	KEGG	DDX23; SNRPA1; SRSF7; SNW1; SRSF1; RBM8A; SRSF3; SRSF2; LSM5; PCBP1; SRSF8; WBP11; RBMX; HNRNPA3; ALYREF; HNRNPM; SF3A3; HNRNPC; SLU7; PRPF6
Disease	0.00146823	0.00676069	Reactome	STX1A; TGFB1; HDAC5; PDGFRB; CDKN1B; TRAK1; PRDX1; NCSTN; BAD; AKT3; FEN1; CBLL1; FOXO4; CHMP3; ANTXR1; TAF4; RAF1; XRCC4; XRCC6; NEURL1B; UBAP1; SKP1; XRCC5; ARF1; RAC1; DERL1; PIK3R3; YWHAB; CUL5; YWHAE; PDGFB; KPNB1; NUP98; CDC25B; NR4A1; HEYL; GTF2H5; VCP; VAMP2; DLL4; VPS4A; POLR2C; MVB12B; FGFR4; HEY1; TAF7; SNW1; NELFCD; PLCG1; TAF9; STAT5B; MAMLD1; FKBP1A; AGK; CCNK
VEGFA-VEGFR2 Signaling Pathway	0.00164429	0.00737891	Wikipathways	MMP14; NFATC1; HDAC5; KCNC3; MAPK14; PLCG1; ERG; MAPK12; FOXO4; RAF1; MAPKAPK2; CAV1; DNAJB9; FHL2; CDH5; YWHAE; ARHGEF15; RAC1; NR4A1; RHOJ; SHB; DLL4; IGFBP7; RHOC; NOTCH4; VAV2; EZR; ELK1; NCL; MMP2
Axon guidance - Homo sapiens (human)	0.00167703	0.00737891	KEGG	NFATC3; RYK; EPHA3; SRGAP2; RRAS; PLCG1; RAF1; GNAI1; PLXNB2; PLXNB3; SEMA6B; PIK3R3; EPHB3; DPYSL2; EPHB4; RAC1; UNC5B; CAMK2G; CAMK2A; EFNA1; ABLIM2; RHOD; SEMA5A; PPP3CB
Signaling by NOTCH	0.00207008	0.00891036	Reactome	DTX4; MDK; HEYL; SNW1; HDAC5; E2F1; NOTCH3; NOTCH4; TACC3; SKP1; NCSTN; MAMLD1; DLK1; PLXND1; NEURL1B; DLL4; LFNG; HEY1
Calcium Regulation in the Cardiac Cell	0.00226929	0.00952855	Wikipathways	ADCY7; GJA4; ITPR1; RGS11; CACNB3; GNAO1; GRK4; CAMK2G; CAMK2A; GNB4; GNG11; GNAZ; ADRB2; GNG2; CACNA1A; FKBP1A; YWHAB; SLC8A3; YWHAE; ATP1B3; GNAI1
Relaxin signaling pathway - Homo sapiens (human)	0.00236656	0.00952855	KEGG	TGFB1; ADCY7; COL4A1; GNAO1; GNG11; GNB4; PIK3R3; MAPK14; GNG2; AKT3; COL1A2; COL4A2; MAPK12; COL1A1; COL3A1; EDNRB; MMP2; RAF1; GNAI1
Metabolism of proteins	0.00238644	0.00952855	Reactome	ASB11; TUSC3; HIST1H4H; ARCN1; SRP9; ACHE; AGT; TOMM70; TMED10; RPL22L1; ADAMTS7; ASB4; ASB5; COPS3; ASB8; ADAMTS8; N6AMT1; CUL5; THY1; SOCS5; NUP98; MRPS6; COG1; UBE2R2; VWA1; USP30; UBE2V2; TRAPPC9; WDTC1; APP; FBXL7; MSRA; MRPL42; GNG2; GBA; GNAO1; HSPG2; RPL3; ENAM; UBE2L3; LAMB1; LAMB2; TMEM132A; XRCC4; CDK1; KBTBD7; CHD3; TTLL3; ADAMTSL4; METTL22; TUBA1A; CCNE1; SRP68; CBX2; DERL1; GMDS; H3…
Human papillomavirus infection - Homo sapiens (human)	0.0024062	0.00952855	KEGG	PDGFRB; HDAC5; PPP2R1A; CDKN1B; IKBKB; BAD; AKT3; LAMB1; LAMB2; RAF1; HEYL; THBS4; CCNE1; THBS3; PIK3R3; LFNG; ATP6V0C; LAMA3; LAMA4; CDK6; COL4A2; COL4A1; LAMC1; HEY1; RHEB; CASP3; E2F1; NOTCH4; ITGA10; NOTCH3; TUBG2; COL1A2; ATP6V1G1; COL1A1; COL6A1; COL6A3; COL6A2; WNT11; COL6A6
Cholinergic synapse - Homo sapiens (human)	0.0026189	0.0101675	KEGG	KCNJ12; ADCY7; KCNJ14; CACNA1A; CAMK2G; GNG11; GNB4; CAMK2A; PIK3R6; AKT3; GNG2; GNAO1; ACHE; CHRNA7; ITPR1; PIK3R3; GNAI1
Toxoplasmosis - Homo sapiens (human)	0.00288159	0.0109722	KEGG	TGFB1; TGFB3; LAMA4; CASP3; GNAO1; LAMA3; MAPK14; PIK3R6; BAD; AKT3; IKBKB; MAPK12; LAMB1; LAMB2; LAMC1; IRAK1; GNAI1
Senescence and Autophagy in Cancer	0.00365095	0.0136394	Wikipathways	MMP14; TGFB1; IRF7; E2F1; ATG16L1; CDC25B; COL1A1; MAPK14; IGFBP3; SPARC; LAMP2; CDKN1B; COL3A1; RAF1; SERPINE1; IGFBP7
Spinal Cord Injury	0.00416091	0.0152567	Wikipathways	TGFB1; AQP4; NR4A1; E2F1; CSPG4; LTB4R; RTN4; GADD45A; RAC1; CASP3; CDK1; ZFP36; COL4A1; FKBP1A; RHOC; CDKN1B; BTG2
Cellular response to heat stress	0.00462942	0.0166659	Reactome	BAG2; HSPA12B; CAMK2G; NUP98; PTGES3; EEF1A1; DNAJC7; RPA1; CAMK2A; VCP; ST13; HSPA14; SERPINH1; MAPKAPK2; YWHAE
Epstein-Barr virus infection - Homo sapiens (human)	0.00480034	0.0169726	KEGG	PSMD4; PSMD7; PSMD1; PSMD3; PSMD2; MAPK14; AKT3; MAPK12; GADD45A; CCNE1; PIK3R3; IKBKB; CDKN1B; PSMC2; IRAK1; PSMC3; TRAF5; RAC1; RIPK1; SNW1; IRF7; CASP3; E2F1; PSMD13; CDK6
Epithelial to mesenchymal transition in colorectal cancer	0.00532939	0.0185126	Wikipathways	COL4A1; TGFB1; TGFB3; MAPK12; TUSC3; NOTCH4; RAF1; ID2; JUP; NOTCH3; MAPK14; SPARC; AKT3; DLK1; COL4A2; PKP1; DLL4; PIK3R3; MMP2; CLDN5; WNT11
Oxytocin signaling pathway - Homo sapiens (human)	0.0062676	0.0213963	KEGG	EEF2K; NFATC1; KCNJ12; ADCY7; KCNJ14; CACNB3; GNAO1; CAMK2G; MYLK2; CAMK2A; CALML6; CACNG8; PIK3R6; NFATC3; ELK1; CACNG1; PPP3CB; ITPR1; RAF1; GNAI1
Hepatitis B - Homo sapiens (human)	0.00737391	0.0247463	KEGG	NFATC1; NFATC3; IRF7; CCNE1; E2F1; TGFB1; ELK1; CDKN1B; HSPG2; IKBKB; STAT5B; BAD; AKT3; PIK3R3; CDK6; YWHAB; TGFB3; RAF1; CASP3
Regulation of Insulin-like Growth Factor (IGF) transport and uptake by Insulin-like Growth Factor Binding Proteins (IGFBPs)	0.00877809	0.0289677	Reactome	IGF2; LAMC1; TMEM132A; P4HB; ENAM; SPARCL1; VWA1; IGFBP2; IGFBP3; IGFBP7; LAMB1; C3; MXRA8; LAMB2; MMP2; APP; CKAP4
Toll Like Receptor 3 (TLR3) Cascade	0.00935826	0.030376	Reactome	PPP2R1A; RIPK1; IRF7; VRK3; DHX9; UBE2N; APP; SKP1; IKBKB; RIPK3; ELK1; IRAK1; MAPKAPK2; MAPK14
Axon guidance	0.00972976	0.0310725	Reactome	LYPLA2; EPHA3; SRGAP2; RRAS; ITGA10; LAMB1; NCAM1; PLXNB3; CACNB3; CAP2; ST8SIA2; PLXND1; EPHB3; DPYSL2; EPHB4; RAC1; UNC5B; EFNA1; FLRT3; COL4A2; COL4A1; ABLIM2; RHOC; LAMC1; SHANK3; COL6A3; AGRN; SEMA5A; VAV2; PLCG1; EZR; ARHGEF28; SCN1B; COL6A1; ARHGAP39; PPP3CB; COL6A2; COL6A6
