# Supplementary material for: Metformin alters skeletal muscle transcriptome adaptations to resistance training in older adults
Source: Aging (Albany NY). 2020 Oct 18;12(20):19852–66. doi: 10.18632/aging.104096 (PMC7655218; doi:10.18632/aging.104096)
Supplement: Supplementary Table 5 [file aging-12-104096-s004..xlsx]

## Sheet: OvsY_sig
Supplementary Table 5. List of Differentially Expressed Genes between young skeletal muscle and all baseline muscle old subjects
ENSEMBL ID	Hugo Gene Symbol	logFC	AveExpr	t	P.Value	adj.P.Val	group
ENSG00000148468.16_FAM171A1	FAM171A1	-1.44405	1.94812	-12.8796	8.53231e-28	1.35467e-23	Significantly downregulated (Adj-P<0.01)
ENSG00000173253.15_DMRT2	DMRT2	-1.90831	1.70407	-12.689	3.2158e-27	2.55286e-23	Significantly downregulated (Adj-P<0.01)
ENSG00000003756.16_RBM5	RBM5	0.602257	6.58289	12.1942	9.99207e-26	5.28814e-22	Significantly downregulated (Adj-P<0.01)
ENSG00000179588.8_ZFPM1	ZFPM1	-1.08626	1.45174	-11.2007	9.38349e-23	3.72454e-19	Significantly downregulated (Adj-P<0.01)
ENSG00000114857.17_NKTR	NKTR	0.760317	6.06495	11.1561	1.27242e-22	4.04045e-19	Significantly downregulated (Adj-P<0.01)
ENSG00000163597.14_SNHG16	SNHG16	-0.701309	6.01866	-10.8467	1.0483e-21	2.37769e-18	Significantly downregulated (Adj-P<0.01)
ENSG00000147231.13_CXorf57	CXorf57	1.55134	1.93865	10.9105	6.79068e-22	1.79693e-18	Significantly downregulated (Adj-P<0.01)
ENSG00000101892.11_ATP1B4	ATP1B4	0.905127	6.4834	10.8159	1.29158e-21	2.5633e-18	Significantly downregulated (Adj-P<0.01)
ENSG00000118939.17_UCHL3	UCHL3	-0.923586	3.19686	-10.6968	2.89584e-21	5.10858e-18	Significantly downregulated (Adj-P<0.01)
ENSG00000198712.1_MT-CO2	MT-CO2	-1.19383	12.619	-10.54	8.35802e-21	1.327e-17	Significantly downregulated (Adj-P<0.01)
ENSG00000158987.20_RAPGEF6	RAPGEF6	0.89787	2.82599	10.3608	2.79382e-20	4.0325e-17	Significantly downregulated (Adj-P<0.01)
ENSG00000176225.13_RTTN	RTTN	1.04019	3.26273	10.326	3.52714e-20	4.6667e-17	Significantly downregulated (Adj-P<0.01)
ENSG00000095564.13_BTAF1	BTAF1	0.842995	4.37693	10.2624	5.40426e-20	6.60027e-17	Significantly downregulated (Adj-P<0.01)
ENSG00000141449.14_GREB1L	GREB1L	1.36488	3.72344	10.2194	7.20912e-20	8.17566e-17	Significantly downregulated (Adj-P<0.01)
ENSG00000075415.12_SLC25A3	SLC25A3	-0.582244	8.96621	-10.1729	9.83651e-20	1.04116e-16	Significantly downregulated (Adj-P<0.01)
ENSG00000005810.17_MYCBP2	MYCBP2	0.667419	4.95415	10.1442	1.19104e-19	1.18189e-16	Significantly downregulated (Adj-P<0.01)
ENSG00000076685.18_NT5C2	NT5C2	0.790875	6.67299	10.0935	1.67095e-19	1.56057e-16	Significantly downregulated (Adj-P<0.01)
ENSG00000169242.11_EFNA1	EFNA1	-1.04436	1.6873	-10.012	2.87646e-19	2.5372e-16	Significantly downregulated (Adj-P<0.01)
ENSG00000198899.2_MT-ATP6	MT-ATP6	-1.21038	12.9778	-9.96428	3.94887e-19	3.2998e-16	Significantly downregulated (Adj-P<0.01)
ENSG00000184831.13_APOO	APOO	-0.700675	3.67899	-9.93308	4.85783e-19	3.85639e-16	Significantly downregulated (Adj-P<0.01)
ENSG00000110697.12_PITPNM1	PITPNM1	-1.45902	2.57363	-9.78136	1.32639e-18	9.5723e-16	Significantly downregulated (Adj-P<0.01)
ENSG00000154258.16_ABCA9	ABCA9	0.750191	3.92987	9.77423	1.39035e-18	9.59762e-16	Significantly downregulated (Adj-P<0.01)
ENSG00000131018.22_SYNE1	SYNE1	0.570692	6.26905	9.73354	1.81863e-18	1.2031e-15	Significantly downregulated (Adj-P<0.01)
ENSG00000137766.17_UNC13C	UNC13C	3.04498	2.98707	9.79098	1.24474e-18	9.4108e-16	Significantly downregulated (Adj-P<0.01)
ENSG00000172115.8_CYCS	CYCS	-0.77502	8.08549	-9.6967	2.31832e-18	1.47232e-15	Significantly downregulated (Adj-P<0.01)
ENSG00000113240.12_CLK4	CLK4	0.651899	5.29694	9.63544	3.46903e-18	2.11837e-15	Significantly downregulated (Adj-P<0.01)
ENSG00000136521.12_NDUFB5	NDUFB5	-0.497885	6.8065	-9.62255	3.77573e-18	2.22027e-15	Significantly downregulated (Adj-P<0.01)
ENSG00000119707.13_RBM25	RBM25	0.505275	6.24608	9.56471	5.51901e-18	3.12948e-15	Significantly downregulated (Adj-P<0.01)
ENSG00000261553.5_AL137782.1	AL137782.1	1.31528	3.4161	9.54546	6.26118e-18	3.42789e-15	Significantly downregulated (Adj-P<0.01)
ENSG00000157106.16_SMG1	SMG1	0.795805	6.92964	9.53062	6.90039e-18	3.65191e-15	Significantly downregulated (Adj-P<0.01)
ENSG00000134056.11_MRPS36	MRPS36	-0.554547	4.36543	-9.515	7.64326e-18	3.91458e-15	Significantly downregulated (Adj-P<0.01)
ENSG00000170873.18_MTSS1	MTSS1	0.693904	5.07412	9.49009	8.99605e-18	4.46345e-15	Significantly downregulated (Adj-P<0.01)
ENSG00000198763.3_MT-ND2	MT-ND2	-1.24823	12.7624	-9.45344	1.14307e-17	5.49957e-15	Significantly downregulated (Adj-P<0.01)
ENSG00000149311.18_ATM	ATM	0.582787	4.30719	9.42934	1.33782e-17	6.12674e-15	Significantly downregulated (Adj-P<0.01)
ENSG00000112159.11_MDN1	MDN1	0.642635	5.82986	9.42788	1.35061e-17	6.12674e-15	Significantly downregulated (Adj-P<0.01)
ENSG00000172172.7_MRPL13	MRPL13	-0.568792	3.5401	-9.39438	1.68029e-17	7.41056e-15	Significantly downregulated (Adj-P<0.01)
ENSG00000198938.2_MT-CO3	MT-CO3	-1.11848	13.4887	-9.3857	1.778e-17	7.62953e-15	Significantly downregulated (Adj-P<0.01)
ENSG00000147548.16_NSD3	NSD3	0.488185	4.74301	9.35855	2.12183e-17	8.86533e-15	Significantly downregulated (Adj-P<0.01)
ENSG00000083097.14_DOP1A	DOP1A	0.753286	4.12146	9.34012	2.39209e-17	9.73828e-15	Significantly downregulated (Adj-P<0.01)
ENSG00000137364.4_TPMT	TPMT	-0.477578	3.93476	-9.22402	5.08076e-17	2.01668e-14	Significantly downregulated (Adj-P<0.01)
ENSG00000064042.17_LIMCH1	LIMCH1	0.594547	8.45185	9.18146	6.69071e-17	2.59094e-14	Significantly downregulated (Adj-P<0.01)
ENSG00000198886.2_MT-ND4	MT-ND4	-1.14876	13.5709	-9.15664	7.85431e-17	2.96911e-14	Significantly downregulated (Adj-P<0.01)
ENSG00000165629.19_ATP5F1C	ATP5F1C	-0.663686	7.39301	-9.12487	9.64056e-17	3.55961e-14	Significantly downregulated (Adj-P<0.01)
ENSG00000198888.2_MT-ND1	MT-ND1	-1.00386	12.8875	-9.05123	1.54882e-16	5.58877e-14	Significantly downregulated (Adj-P<0.01)
ENSG00000089101.17_CFAP61	CFAP61	2.32026	3.26814	9.04241	1.63913e-16	5.78323e-14	Significantly downregulated (Adj-P<0.01)
ENSG00000187446.11_CHP1	CHP1	-0.667614	5.74034	-9.01643	1.93683e-16	6.47515e-14	Significantly downregulated (Adj-P<0.01)
ENSG00000173511.9_VEGFB	VEGFB	-0.739173	5.58116	-9.01477	1.95759e-16	6.47515e-14	Significantly downregulated (Adj-P<0.01)
ENSG00000128585.17_MKLN1	MKLN1	0.745354	4.40633	8.99579	2.21096e-16	7.02067e-14	Significantly downregulated (Adj-P<0.01)
ENSG00000197603.13_CPLANE1	CPLANE1	0.837402	2.72533	8.96946	2.61745e-16	8.14849e-14	Significantly downregulated (Adj-P<0.01)
ENSG00000230148.8_HOXB-AS1	HOXB-AS1	-1.2049	0.0423155	-9.00337	2.10614e-16	6.82432e-14	Significantly downregulated (Adj-P<0.01)
ENSG00000160305.17_DIP2A	DIP2A	0.660232	4.84661	8.96371	2.71566e-16	8.29163e-14	Significantly downregulated (Adj-P<0.01)
ENSG00000182670.13_TTC3	TTC3	0.529029	6.58682	8.95146	2.93719e-16	8.79882e-14	Significantly downregulated (Adj-P<0.01)
ENSG00000168256.17_NKIRAS2	NKIRAS2	-0.341894	4.81441	-8.94705	3.02127e-16	8.88308e-14	Significantly downregulated (Adj-P<0.01)
ENSG00000277209.1_RPPH1	RPPH1	-1.97848	-1.3857	-9.02898	1.78681e-16	6.16721e-14	Significantly downregulated (Adj-P<0.01)
ENSG00000128881.16_TTBK2	TTBK2	0.590105	4.85243	8.91392	3.73434e-16	1.078e-13	Significantly downregulated (Adj-P<0.01)
ENSG00000178741.11_COX5A	COX5A	-0.630174	7.68747	-8.90391	3.98076e-16	1.12862e-13	Significantly downregulated (Adj-P<0.01)
ENSG00000173917.10_HOXB2	HOXB2	-1.02065	1.92176	-8.89285	4.27217e-16	1.18999e-13	Significantly downregulated (Adj-P<0.01)
ENSG00000106554.12_CHCHD3	CHCHD3	-0.657553	7.17065	-8.87322	4.84217e-16	1.3255e-13	Significantly downregulated (Adj-P<0.01)
ENSG00000035141.7_FAM136A	FAM136A	-0.623655	3.94104	-8.86041	5.25438e-16	1.41396e-13	Significantly downregulated (Adj-P<0.01)
ENSG00000115020.16_PIKFYVE	PIKFYVE	0.749759	4.33017	8.85193	5.54604e-16	1.44462e-13	Significantly downregulated (Adj-P<0.01)
ENSG00000141736.13_ERBB2	ERBB2	0.521948	5.00387	8.85181	5.55028e-16	1.44462e-13	Significantly downregulated (Adj-P<0.01)
ENSG00000107077.18_KDM4C	KDM4C	0.4508	2.70592	8.82253	6.6882e-16	1.71272e-13	Significantly downregulated (Adj-P<0.01)
ENSG00000135070.14_ISCA1	ISCA1	-0.477452	5.9706	-8.80786	7.34217e-16	1.85034e-13	Significantly downregulated (Adj-P<0.01)
ENSG00000101639.18_CEP192	CEP192	0.787936	3.31134	8.79877	7.77924e-16	1.92986e-13	Significantly downregulated (Adj-P<0.01)
ENSG00000198727.2_MT-CYB	MT-CYB	-0.999428	12.9843	-8.79418	8.00932e-16	1.95637e-13	Significantly downregulated (Adj-P<0.01)
ENSG00000149970.15_CNKSR2	CNKSR2	-1.44998	2.57336	-8.77298	9.16407e-16	2.20452e-13	Significantly downregulated (Adj-P<0.01)
ENSG00000111530.12_CAND1	CAND1	0.497047	4.76222	8.77044	9.31355e-16	2.20703e-13	Significantly downregulated (Adj-P<0.01)
ENSG00000005020.12_SKAP2	SKAP2	1.15629	3.48823	8.75841	1.00525e-15	2.34711e-13	Significantly downregulated (Adj-P<0.01)
ENSG00000131828.13_PDHA1	PDHA1	-0.580685	7.25675	-8.7281	1.21826e-15	2.80324e-13	Significantly downregulated (Adj-P<0.01)
ENSG00000211459.2_MT-RNR1	MT-RNR1	-1.23098	11.5237	-8.6856	1.59431e-15	3.51567e-13	Significantly downregulated (Adj-P<0.01)
ENSG00000112893.9_MAN2A1	MAN2A1	0.689806	4.34918	8.68606	1.58968e-15	3.51567e-13	Significantly downregulated (Adj-P<0.01)
ENSG00000188153.13_COL4A5	COL4A5	0.740271	4.03645	8.67658	1.68778e-15	3.6708e-13	Significantly downregulated (Adj-P<0.01)
ENSG00000248527.1_MTATP6P1	MTATP6P1	-1.20528	8.54447	-8.63344	2.21634e-15	4.75525e-13	Significantly downregulated (Adj-P<0.01)
ENSG00000082397.17_EPB41L3	EPB41L3	1.60679	2.76597	8.62793	2.29472e-15	4.85777e-13	Significantly downregulated (Adj-P<0.01)
ENSG00000130590.13_SAMD10	SAMD10	-1.20913	-0.788681	-8.70782	1.38514e-15	3.1417e-13	Significantly downregulated (Adj-P<0.01)
ENSG00000023572.9_GLRX2	GLRX2	-0.525211	4.36387	-8.60396	2.66883e-15	5.57539e-13	Significantly downregulated (Adj-P<0.01)
ENSG00000125676.19_THOC2	THOC2	0.418278	4.65429	8.60143	2.71172e-15	5.59142e-13	Significantly downregulated (Adj-P<0.01)
ENSG00000140905.10_GCSH	GCSH	-0.582011	4.9642	-8.59459	2.83115e-15	5.73307e-13	Significantly downregulated (Adj-P<0.01)
ENSG00000104325.6_DECR1	DECR1	-0.710454	5.92395	-8.59339	2.85263e-15	5.73307e-13	Significantly downregulated (Adj-P<0.01)
ENSG00000111832.12_RWDD1	RWDD1	-0.473652	5.68347	-8.56088	3.49988e-15	6.8602e-13	Significantly downregulated (Adj-P<0.01)
ENSG00000130037.4_KCNA5	KCNA5	-1.0622	1.3224	-8.56115	3.49384e-15	6.8602e-13	Significantly downregulated (Adj-P<0.01)
ENSG00000237190.3_CDKN2AIPNL	CDKN2AIPNL	-0.439414	4.73732	-8.52903	4.27491e-15	8.27716e-13	Significantly downregulated (Adj-P<0.01)
ENSG00000147162.13_OGT	OGT	0.645403	7.29219	8.52305	4.43834e-15	8.49005e-13	Significantly downregulated (Adj-P<0.01)
ENSG00000247828.7_TMEM161B-AS1	TMEM161B-AS1	-0.800144	2.27039	-8.49465	5.30322e-15	9.90579e-13	Significantly downregulated (Adj-P<0.01)
ENSG00000277027.1_RMRP	RMRP	-1.65795	-1.19977	-8.51021	4.8104e-15	9.09223e-13	Significantly downregulated (Adj-P<0.01)
ENSG00000253352.9_TUG1	TUG1	0.539783	5.69438	8.46514	6.3794e-15	1.17774e-12	Significantly downregulated (Adj-P<0.01)
ENSG00000163541.11_SUCLG1	SUCLG1	-0.514236	6.53815	-8.44501	7.23473e-15	1.3203e-12	Significantly downregulated (Adj-P<0.01)
ENSG00000100697.14_DICER1	DICER1	0.676629	5.6395	8.42623	8.13488e-15	1.4677e-12	Significantly downregulated (Adj-P<0.01)
ENSG00000130347.12_RTN4IP1	RTN4IP1	-0.638836	3.19103	-8.41226	8.87625e-15	1.58346e-12	Significantly downregulated (Adj-P<0.01)
ENSG00000164506.14_STXBP5	STXBP5	0.687754	4.52705	8.3782	1.09753e-14	1.91488e-12	Significantly downregulated (Adj-P<0.01)
ENSG00000085760.14_MTIF2	MTIF2	-0.51916	5.10909	-8.3815	1.0752e-14	1.89678e-12	Significantly downregulated (Adj-P<0.01)
ENSG00000230551.4_AC021078.1	AC021078.1	0.773641	3.8452	8.35751	1.2484e-14	2.15443e-12	Significantly downregulated (Adj-P<0.01)
ENSG00000165637.13_VDAC2	VDAC2	-0.394053	7.63311	-8.34929	1.31383e-14	2.24298e-12	Significantly downregulated (Adj-P<0.01)
ENSG00000067141.16_NEO1	NEO1	0.608135	5.71357	8.34724	1.3307e-14	2.24761e-12	Significantly downregulated (Adj-P<0.01)
ENSG00000178127.12_NDUFV2	NDUFV2	-0.446178	7.30791	-8.34001	1.39183e-14	2.32612e-12	Significantly downregulated (Adj-P<0.01)
ENSG00000154767.14_XPC	XPC	0.405378	3.87192	8.33025	1.47886e-14	2.42061e-12	Significantly downregulated (Adj-P<0.01)
ENSG00000047410.13_TPR	TPR	0.470257	5.72768	8.33368	1.44766e-14	2.39421e-12	Significantly downregulated (Adj-P<0.01)
ENSG00000134186.11_PRPF38B	PRPF38B	0.371436	4.71819	8.32534	1.52466e-14	2.4701e-12	Significantly downregulated (Adj-P<0.01)
ENSG00000054277.13_OPN3	OPN3	-0.92867	1.41541	-8.3164	1.61163e-14	2.57688e-12	Significantly downregulated (Adj-P<0.01)
ENSG00000147687.18_TATDN1	TATDN1	-0.454976	3.74514	-8.31527	1.62303e-14	2.57688e-12	Significantly downregulated (Adj-P<0.01)
ENSG00000073614.12_KDM5A	KDM5A	0.518282	4.05955	8.30854	1.69222e-14	2.66014e-12	Significantly downregulated (Adj-P<0.01)
ENSG00000170270.4_GON7	GON7	-0.587416	2.37536	-8.30565	1.7228e-14	2.68166e-12	Significantly downregulated (Adj-P<0.01)
ENSG00000204271.12_SPIN3	SPIN3	0.693129	2.24407	8.30328	1.7484e-14	2.69509e-12	Significantly downregulated (Adj-P<0.01)
ENSG00000129084.17_PSMA1	PSMA1	-0.358282	5.81034	-8.2724	2.11706e-14	3.23197e-12	Significantly downregulated (Adj-P<0.01)
ENSG00000197535.14_MYO5A	MYO5A	0.680587	3.63951	8.26227	2.25405e-14	3.40833e-12	Significantly downregulated (Adj-P<0.01)
ENSG00000078804.12_TP53INP2	TP53INP2	-0.852938	5.58861	-8.25951	2.29289e-14	3.43436e-12	Significantly downregulated (Adj-P<0.01)
ENSG00000189350.12_TOGARAM2	TOGARAM2	-1.82661	1.8979	-8.24977	2.4354e-14	3.54742e-12	Significantly downregulated (Adj-P<0.01)
ENSG00000257315.2_ZBED6	ZBED6	2.35328	3.63588	8.24824	2.45854e-14	3.54779e-12	Significantly downregulated (Adj-P<0.01)
ENSG00000082146.12_STRADB	STRADB	-0.563366	5.87692	-8.25544	2.35145e-14	3.48916e-12	Significantly downregulated (Adj-P<0.01)
ENSG00000134884.14_ARGLU1	ARGLU1	0.436054	6.42711	8.24991	2.43329e-14	3.54742e-12	Significantly downregulated (Adj-P<0.01)
ENSG00000153485.5_TMEM251	TMEM251	-0.532475	2.6775	-8.24096	2.5717e-14	3.63493e-12	Significantly downregulated (Adj-P<0.01)
ENSG00000173611.17_SCAI	SCAI	0.807618	3.48038	8.23999	2.58706e-14	3.63493e-12	Significantly downregulated (Adj-P<0.01)
ENSG00000146281.5_PM20D2	PM20D2	0.607586	5.53267	8.24681	2.48035e-14	3.54779e-12	Significantly downregulated (Adj-P<0.01)
ENSG00000185946.15_RNPC3	RNPC3	0.771156	4.83322	8.23205	2.7173e-14	3.75152e-12	Significantly downregulated (Adj-P<0.01)
ENSG00000243317.7_STMP1	STMP1	-0.486412	4.95515	-8.2337	2.68974e-14	3.74605e-12	Significantly downregulated (Adj-P<0.01)
ENSG00000048649.13_RSF1	RSF1	0.521946	4.54128	8.20928	3.12738e-14	4.24989e-12	Significantly downregulated (Adj-P<0.01)
ENSG00000182963.9_GJC1	GJC1	-0.877571	2.43195	-8.20185	3.27402e-14	4.40523e-12	Significantly downregulated (Adj-P<0.01)
ENSG00000146122.16_DAAM2	DAAM2	-1.16646	5.09706	-8.19736	3.366e-14	4.49092e-12	Significantly downregulated (Adj-P<0.01)
ENSG00000157827.19_FMNL2	FMNL2	0.700252	4.22093	8.18962	3.53064e-14	4.67133e-12	Significantly downregulated (Adj-P<0.01)
ENSG00000104967.6_NOVA2	NOVA2	-0.763564	1.64407	-8.17604	3.83875e-14	4.99573e-12	Significantly downregulated (Adj-P<0.01)
ENSG00000182180.13_MRPS16	MRPS16	-0.39188	6.16741	-8.18077	3.72848e-14	4.89232e-12	Significantly downregulated (Adj-P<0.01)
ENSG00000135913.10_USP37	USP37	1.24967	3.04865	8.16954	3.99557e-14	5.15754e-12	Significantly downregulated (Adj-P<0.01)
ENSG00000281183.1_NPTN-IT1	NPTN-IT1	1.30422	2.3617	8.16501	4.10858e-14	5.26063e-12	Significantly downregulated (Adj-P<0.01)
ENSG00000134909.18_ARHGAP32	ARHGAP32	0.72139	4.14614	8.15894	4.26486e-14	5.4124e-12	Significantly downregulated (Adj-P<0.01)
ENSG00000102738.7_MRPS31	MRPS31	-0.450966	3.60954	-8.15643	4.3313e-14	5.4148e-12	Significantly downregulated (Adj-P<0.01)
ENSG00000184226.14_PCDH9	PCDH9	1.40736	2.53327	8.15778	4.29528e-14	5.4124e-12	Significantly downregulated (Adj-P<0.01)
ENSG00000167799.9_NUDT8	NUDT8	-0.877712	3.4788	-8.13989	4.79504e-14	5.94772e-12	Significantly downregulated (Adj-P<0.01)
ENSG00000134313.15_KIDINS220	KIDINS220	0.509457	5.58041	8.11744	5.50398e-14	6.77416e-12	Significantly downregulated (Adj-P<0.01)
ENSG00000013441.15_CLK1	CLK1	0.630876	6.69593	8.09682	6.24612e-14	7.62843e-12	Significantly downregulated (Adj-P<0.01)
ENSG00000164588.6_HCN1	HCN1	2.09941	2.97547	8.07774	7.02084e-14	8.50915e-12	Significantly downregulated (Adj-P<0.01)
ENSG00000138131.3_LOXL4	LOXL4	1.54438	2.28777	8.06923	7.39657e-14	8.89662e-12	Significantly downregulated (Adj-P<0.01)
ENSG00000279649.1_AC020978.9	AC020978.9	1.10527	2.63698	8.05142	8.24815e-14	9.77283e-12	Significantly downregulated (Adj-P<0.01)
ENSG00000126217.20_MCF2L	MCF2L	-0.773151	4.58721	-8.05511	8.06412e-14	9.62662e-12	Significantly downregulated (Adj-P<0.01)
ENSG00000163170.11_BOLA3	BOLA3	-0.637631	4.04834	-8.0472	8.46396e-14	9.95424e-12	Significantly downregulated (Adj-P<0.01)
ENSG00000116560.10_SFPQ	SFPQ	0.398037	6.43401	8.03886	8.90653e-14	1.03977e-11	Significantly downregulated (Adj-P<0.01)
ENSG00000022840.15_RNF10	RNF10	-0.372915	7.7687	-8.03263	9.25197e-14	1.07193e-11	Significantly downregulated (Adj-P<0.01)
ENSG00000240583.11_AQP1	AQP1	-0.746903	6.63716	-8.03148	9.31701e-14	1.07193e-11	Significantly downregulated (Adj-P<0.01)
ENSG00000275131.3_AC241952.1	AC241952.1	0.795417	8.26937	8.02023	9.97952e-14	1.13989e-11	Significantly downregulated (Adj-P<0.01)
ENSG00000188906.15_LRRK2	LRRK2	0.905617	3.77666	7.9982	1.14151e-13	1.29456e-11	Significantly downregulated (Adj-P<0.01)
ENSG00000050393.11_MCUR1	MCUR1	-0.44822	4.11324	-7.98783	1.21603e-13	1.36085e-11	Significantly downregulated (Adj-P<0.01)
ENSG00000108010.11_GLRX3	GLRX3	-0.372317	4.1999	-7.98768	1.21711e-13	1.36085e-11	Significantly downregulated (Adj-P<0.01)
ENSG00000141298.18_SSH2	SSH2	0.54876	6.73792	7.97707	1.29838e-13	1.43156e-11	Significantly downregulated (Adj-P<0.01)
ENSG00000171202.6_TMEM126A	TMEM126A	-0.530786	4.081	-7.96415	1.40455e-13	1.53793e-11	Significantly downregulated (Adj-P<0.01)
ENSG00000162613.16_FUBP1	FUBP1	0.559854	4.75469	7.96042	1.43682e-13	1.54138e-11	Significantly downregulated (Adj-P<0.01)
ENSG00000137996.12_RTCA	RTCA	-0.369273	4.65988	-7.96208	1.42238e-13	1.54138e-11	Significantly downregulated (Adj-P<0.01)
ENSG00000120992.17_LYPLA1	LYPLA1	-0.586746	5.30468	-7.96092	1.43243e-13	1.54138e-11	Significantly downregulated (Adj-P<0.01)
ENSG00000123200.16_ZC3H13	ZC3H13	0.454017	5.51341	7.9591	1.44844e-13	1.54341e-11	Significantly downregulated (Adj-P<0.01)
ENSG00000204954.9_C12orf73	C12orf73	-0.509908	3.3345	-7.94907	1.53951e-13	1.61873e-11	Significantly downregulated (Adj-P<0.01)
ENSG00000232119.7_MCTS1	MCTS1	-0.469488	3.02034	-7.94522	1.57596e-13	1.64616e-11	Significantly downregulated (Adj-P<0.01)
ENSG00000171824.13_EXOSC10	EXOSC10	0.409664	5.01975	7.95246	1.5081e-13	1.59627e-11	Significantly downregulated (Adj-P<0.01)
ENSG00000037280.15_FLT4	FLT4	-0.786233	2.66053	-7.93753	1.65135e-13	1.71363e-11	Significantly downregulated (Adj-P<0.01)
ENSG00000171055.14_FEZ2	FEZ2	0.934605	6.61472	7.92376	1.79537e-13	1.85098e-11	Significantly downregulated (Adj-P<0.01)
ENSG00000177150.12_FAM210A	FAM210A	-0.566234	4.75988	-7.92126	1.82279e-13	1.86712e-11	Significantly downregulated (Adj-P<0.01)
ENSG00000146247.13_PHIP	PHIP	0.696692	4.91388	7.90862	1.96802e-13	1.99021e-11	Significantly downregulated (Adj-P<0.01)
ENSG00000183605.16_SFXN4	SFXN4	-0.536495	4.3121	-7.90946	1.95808e-13	1.99021e-11	Significantly downregulated (Adj-P<0.01)
ENSG00000102554.13_KLF5	KLF5	1.20893	3.31625	7.89716	2.10963e-13	2.08916e-11	Significantly downregulated (Adj-P<0.01)
ENSG00000174227.15_PIGG	PIGG	0.432749	3.93992	7.89851	2.09247e-13	2.08916e-11	Significantly downregulated (Adj-P<0.01)
ENSG00000116754.13_SRSF11	SRSF11	0.415542	6.56664	7.90033	2.06943e-13	2.07951e-11	Significantly downregulated (Adj-P<0.01)
ENSG00000151729.10_SLC25A4	SLC25A4	-0.653502	10.1541	-7.88828	2.22624e-13	2.16847e-11	Significantly downregulated (Adj-P<0.01)
ENSG00000132424.15_PNISR	PNISR	0.473231	7.01802	7.89647	2.1185e-13	2.08916e-11	Significantly downregulated (Adj-P<0.01)
ENSG00000126091.20_ST3GAL3	ST3GAL3	-0.458117	5.76314	-7.89097	2.19015e-13	2.14648e-11	Significantly downregulated (Adj-P<0.01)
ENSG00000107290.13_SETX	SETX	0.518359	4.99052	7.88267	2.30313e-13	2.22968e-11	Significantly downregulated (Adj-P<0.01)
ENSG00000115760.14_BIRC6	BIRC6	0.545876	5.35034	7.87353	2.43409e-13	2.32808e-11	Significantly downregulated (Adj-P<0.01)
ENSG00000167434.9_CA4	CA4	-0.880698	2.3905	-7.86125	2.62177e-13	2.44858e-11	Significantly downregulated (Adj-P<0.01)
ENSG00000127914.16_AKAP9	AKAP9	0.593481	6.84502	7.86306	2.59322e-13	2.44858e-11	Significantly downregulated (Adj-P<0.01)
ENSG00000122873.11_CISD1	CISD1	-0.46422	5.40569	-7.86331	2.58932e-13	2.44858e-11	Significantly downregulated (Adj-P<0.01)
ENSG00000172159.15_FRMD3	FRMD3	-0.688313	4.89061	-7.86134	2.62044e-13	2.44858e-11	Significantly downregulated (Adj-P<0.01)
ENSG00000126953.6_TIMM8A	TIMM8A	-0.663446	2.00789	-7.84743	2.85012e-13	2.63089e-11	Significantly downregulated (Adj-P<0.01)
ENSG00000116652.6_DLEU2L	DLEU2L	3.04371	0.223125	8.20905	3.13181e-14	4.24989e-12	Significantly downregulated (Adj-P<0.01)
ENSG00000075292.18_ZNF638	ZNF638	0.395355	5.96824	7.85627	2.70191e-13	2.50867e-11	Significantly downregulated (Adj-P<0.01)
ENSG00000255310.2_AF131215.5	AF131215.5	-1.41929	-1.21651	-7.98046	1.2718e-13	1.41205e-11	Significantly downregulated (Adj-P<0.01)
ENSG00000250479.8_CHCHD10	CHCHD10	-0.727889	7.10096	-7.83807	3.01586e-13	2.73616e-11	Significantly downregulated (Adj-P<0.01)
ENSG00000186377.7_CYP4X1	CYP4X1	1.03051	1.48996	7.84392	2.9112e-13	2.67174e-11	Significantly downregulated (Adj-P<0.01)
ENSG00000122912.14_SLC25A16	SLC25A16	-0.387329	3.72383	-7.82931	3.17978e-13	2.8612e-11	Significantly downregulated (Adj-P<0.01)
ENSG00000144426.18_NBEAL1	NBEAL1	1.13307	1.94418	7.84139	2.95608e-13	2.69734e-11	Significantly downregulated (Adj-P<0.01)
ENSG00000033800.13_PIAS1	PIAS1	0.471802	4.39145	7.8216	3.33106e-13	2.96198e-11	Significantly downregulated (Adj-P<0.01)
ENSG00000100418.7_DESI1	DESI1	-0.377555	4.072	-7.82119	3.33939e-13	2.96198e-11	Significantly downregulated (Adj-P<0.01)
ENSG00000169189.16_NSMCE1	NSMCE1	-0.478935	3.59502	-7.81201	3.52946e-13	3.11318e-11	Significantly downregulated (Adj-P<0.01)
ENSG00000187583.10_PLEKHN1	PLEKHN1	-1.2016	-0.871034	-7.82879	3.18972e-13	2.8612e-11	Significantly downregulated (Adj-P<0.01)
ENSG00000130349.9_C6orf203	C6orf203	-0.441286	3.66918	-7.80629	3.65322e-13	3.18693e-11	Significantly downregulated (Adj-P<0.01)
ENSG00000178982.9_EIF3K	EIF3K	-0.427372	7.17018	-7.80786	3.61875e-13	3.1743e-11	Significantly downregulated (Adj-P<0.01)
ENSG00000104805.15_NUCB1	NUCB1	-0.469609	6.62779	-7.80374	3.70983e-13	3.21863e-11	Significantly downregulated (Adj-P<0.01)
ENSG00000197620.10_CXorf40A	CXorf40A	-0.494228	3.50448	-7.79125	3.99948e-13	3.45107e-11	Significantly downregulated (Adj-P<0.01)
ENSG00000131051.22_RBM39	RBM39	0.363744	6.94485	7.78547	4.14106e-13	3.55393e-11	Significantly downregulated (Adj-P<0.01)
ENSG00000147133.15_TAF1	TAF1	0.48153	4.58818	7.76928	4.56454e-13	3.8963e-11	Significantly downregulated (Adj-P<0.01)
ENSG00000169021.5_UQCRFS1	UQCRFS1	-0.556483	8.05351	-7.76235	4.75882e-13	4.04041e-11	Significantly downregulated (Adj-P<0.01)
ENSG00000009413.15_REV3L	REV3L	0.615175	4.44325	7.75928	4.84743e-13	4.0721e-11	Significantly downregulated (Adj-P<0.01)
ENSG00000265354.3_TIMM23	TIMM23	-0.400622	5.53207	-7.76059	4.80941e-13	4.06165e-11	Significantly downregulated (Adj-P<0.01)
ENSG00000006118.14_TMEM132A	TMEM132A	-0.741026	1.71327	-7.74397	5.31405e-13	4.39433e-11	Significantly downregulated (Adj-P<0.01)
ENSG00000228526.7_MIR34AHG	MIR34AHG	1.67815	0.337237	7.87609	2.39676e-13	2.30627e-11	Significantly downregulated (Adj-P<0.01)
ENSG00000186566.12_GPATCH8	GPATCH8	0.545759	6.69462	7.74558	5.26305e-13	4.39433e-11	Significantly downregulated (Adj-P<0.01)
ENSG00000131378.13_RFTN1	RFTN1	-0.883568	4.05231	-7.74436	5.30163e-13	4.39433e-11	Significantly downregulated (Adj-P<0.01)
ENSG00000204623.9_ZNRD1ASP	ZNRD1ASP	0.621233	3.16678	7.72846	5.83222e-13	4.7731e-11	Significantly downregulated (Adj-P<0.01)
ENSG00000143702.15_CEP170	CEP170	0.71699	5.03101	7.73695	5.54287e-13	4.5598e-11	Significantly downregulated (Adj-P<0.01)
ENSG00000132549.18_VPS13B	VPS13B	0.634103	3.72474	7.71823	6.20117e-13	4.99776e-11	Significantly downregulated (Adj-P<0.01)
ENSG00000126773.12_PCNX4	PCNX4	0.577763	4.68835	7.72179	6.07013e-13	4.94233e-11	Significantly downregulated (Adj-P<0.01)
ENSG00000116459.10_ATP5PB	ATP5PB	-0.505444	7.42045	-7.72092	6.10203e-13	4.94296e-11	Significantly downregulated (Adj-P<0.01)
ENSG00000124570.19_SERPINB6	SERPINB6	-0.386775	5.93174	-7.70198	6.83504e-13	5.48081e-11	Significantly downregulated (Adj-P<0.01)
ENSG00000174485.15_DENND4A	DENND4A	0.616114	3.76414	7.66883	8.33326e-13	6.58245e-11	Significantly downregulated (Adj-P<0.01)
ENSG00000118058.21_KMT2A	KMT2A	0.639335	5.15312	7.67668	7.95159e-13	6.34409e-11	Significantly downregulated (Adj-P<0.01)
ENSG00000108179.13_PPIF	PPIF	-0.644005	5.78954	-7.66989	8.28082e-13	6.57373e-11	Significantly downregulated (Adj-P<0.01)
ENSG00000206530.10_CFAP44	CFAP44	0.767708	1.99343	7.65117	9.25979e-13	7.20675e-11	Significantly downregulated (Adj-P<0.01)
ENSG00000125814.17_NAPB	NAPB	0.5154	2.70389	7.64791	9.44161e-13	7.31241e-11	Significantly downregulated (Adj-P<0.01)
ENSG00000040341.17_STAU2	STAU2	-0.426401	6.17112	-7.65541	9.02868e-13	7.06149e-11	Significantly downregulated (Adj-P<0.01)
ENSG00000197170.9_PSMD12	PSMD12	-0.373217	5.49855	-7.65648	8.97102e-13	7.05114e-11	Significantly downregulated (Adj-P<0.01)
ENSG00000174173.6_TRMT10C	TRMT10C	-0.383925	4.07066	-7.64083	9.84862e-13	7.59061e-11	Significantly downregulated (Adj-P<0.01)
ENSG00000166348.18_USP54	USP54	0.808471	7.07704	7.62751	1.06624e-12	8.14905e-11	Significantly downregulated (Adj-P<0.01)
ENSG00000136247.14_ZDHHC4	ZDHHC4	-0.348022	4.54712	-7.6273	1.06758e-12	8.14905e-11	Significantly downregulated (Adj-P<0.01)
ENSG00000196199.13_MPHOSPH8	MPHOSPH8	0.329252	4.74912	7.62453	1.08532e-12	8.20557e-11	Significantly downregulated (Adj-P<0.01)
ENSG00000162073.13_PAQR4	PAQR4	-0.962723	3.9022	-7.62475	1.08393e-12	8.20557e-11	Significantly downregulated (Adj-P<0.01)
ENSG00000269934.1_AL353593.2	AL353593.2	-1.02955	1.79618	-7.6107	1.17847e-12	8.86759e-11	Significantly downregulated (Adj-P<0.01)
ENSG00000224934.4_AL391684.1	AL391684.1	0.808434	3.15133	7.58687	1.35781e-12	1.01211e-10	Significantly downregulated (Adj-P<0.01)
ENSG00000177932.6_ZNF354C	ZNF354C	0.735509	2.13672	7.58792	1.34941e-12	1.0106e-10	Significantly downregulated (Adj-P<0.01)
ENSG00000136457.9_CHAD	CHAD	1.31051	2.14886	7.58506	1.37248e-12	1.01827e-10	Significantly downregulated (Adj-P<0.01)
ENSG00000168958.19_MFF	MFF	-0.338973	5.26405	-7.58335	1.38648e-12	1.02387e-10	Significantly downregulated (Adj-P<0.01)
ENSG00000257093.6_KIAA1147	KIAA1147	0.576602	3.8367	7.56205	1.57335e-12	1.15115e-10	Significantly downregulated (Adj-P<0.01)
ENSG00000155115.6_GTF3C6	GTF3C6	-0.422216	5.61796	-7.56384	1.55672e-12	1.14426e-10	Significantly downregulated (Adj-P<0.01)
ENSG00000173065.13_FAM222B	FAM222B	-0.513009	3.56282	-7.55319	1.65825e-12	1.20771e-10	Significantly downregulated (Adj-P<0.01)
ENSG00000166352.15_C11orf74	C11orf74	-0.41697	3.24508	-7.5488	1.70193e-12	1.23386e-10	Significantly downregulated (Adj-P<0.01)
ENSG00000152234.15_ATP5F1A	ATP5F1A	-0.515796	9.71624	-7.54169	1.7751e-12	1.27526e-10	Significantly downregulated (Adj-P<0.01)
ENSG00000163960.11_UBXN7	UBXN7	0.574432	4.34372	7.54545	1.73601e-12	1.25285e-10	Significantly downregulated (Adj-P<0.01)
ENSG00000143669.13_LYST	LYST	0.647791	2.64198	7.53031	1.89885e-12	1.3424e-10	Significantly downregulated (Adj-P<0.01)
ENSG00000125878.6_TCF15	TCF15	-0.867489	2.28553	-7.53036	1.89826e-12	1.3424e-10	Significantly downregulated (Adj-P<0.01)
ENSG00000137145.20_DENND4C	DENND4C	0.683763	3.9267	7.5296	1.90679e-12	1.3424e-10	Significantly downregulated (Adj-P<0.01)
ENSG00000181061.13_HIGD1A	HIGD1A	-0.501247	6.34321	-7.53632	1.83243e-12	1.31052e-10	Significantly downregulated (Adj-P<0.01)
ENSG00000244687.11_UBE2V1	UBE2V1	-0.330362	5.51936	-7.52925	1.91083e-12	1.3424e-10	Significantly downregulated (Adj-P<0.01)
ENSG00000250878.3_METTL21EP	METTL21EP	-1.71461	1.92006	-7.51177	2.11887e-12	1.4755e-10	Significantly downregulated (Adj-P<0.01)
ENSG00000146373.16_RNF217	RNF217	0.591686	3.97246	7.50964	2.14568e-12	1.48764e-10	Significantly downregulated (Adj-P<0.01)
ENSG00000198947.15_DMD	DMD	0.750265	8.01267	7.51183	2.11809e-12	1.4755e-10	Significantly downregulated (Adj-P<0.01)
ENSG00000131174.5_COX7B	COX7B	-0.65945	7.48659	-7.5083	2.16272e-12	1.49294e-10	Significantly downregulated (Adj-P<0.01)
ENSG00000172175.13_MALT1	MALT1	0.611788	4.43698	7.5048	2.20794e-12	1.51395e-10	Significantly downregulated (Adj-P<0.01)
ENSG00000106028.10_SSBP1	SSBP1	-0.335962	4.54931	-7.50447	2.21224e-12	1.51395e-10	Significantly downregulated (Adj-P<0.01)
ENSG00000125818.17_PSMF1	PSMF1	-0.306997	6.22316	-7.49647	2.31926e-12	1.58038e-10	Significantly downregulated (Adj-P<0.01)
ENSG00000168067.11_MAP4K2	MAP4K2	-0.557963	2.23091	-7.46916	2.72465e-12	1.83075e-10	Significantly downregulated (Adj-P<0.01)
ENSG00000185070.10_FLRT2	FLRT2	0.760544	5.02137	7.48158	2.53227e-12	1.71816e-10	Significantly downregulated (Adj-P<0.01)
ENSG00000177098.8_SCN4B	SCN4B	-0.989164	4.45317	-7.4725	2.67163e-12	1.805e-10	Significantly downregulated (Adj-P<0.01)
ENSG00000132436.11_FIGNL1	FIGNL1	0.589511	2.64686	7.45334	2.99069e-12	1.9827e-10	Significantly downregulated (Adj-P<0.01)
ENSG00000060762.18_MPC1	MPC1	-0.64081	6.33144	-7.46794	2.74433e-12	1.83075e-10	Significantly downregulated (Adj-P<0.01)
ENSG00000197448.13_GSTK1	GSTK1	-0.475046	6.06828	-7.46804	2.7427e-12	1.83075e-10	Significantly downregulated (Adj-P<0.01)
ENSG00000100099.20_HPS4	HPS4	0.400675	3.8279	7.4499	3.05198e-12	2.01064e-10	Significantly downregulated (Adj-P<0.01)
ENSG00000186575.17_NF2	NF2	-0.35926	5.00097	-7.45298	2.9971e-12	1.9827e-10	Significantly downregulated (Adj-P<0.01)
ENSG00000168209.4_DDIT4	DDIT4	1.29212	5.35382	7.44869	3.0738e-12	2.01664e-10	Significantly downregulated (Adj-P<0.01)
ENSG00000185591.9_SP1	SP1	0.48029	5.42914	7.43319	3.36709e-12	2.18384e-10	Significantly downregulated (Adj-P<0.01)
ENSG00000005194.14_CIAPIN1	CIAPIN1	-0.419557	3.77486	-7.42181	3.60006e-12	2.3141e-10	Significantly downregulated (Adj-P<0.01)
ENSG00000089916.17_GPATCH2L	GPATCH2L	0.42742	5.26071	7.42557	3.52142e-12	2.27275e-10	Significantly downregulated (Adj-P<0.01)
ENSG00000174373.16_RALGAPA1	RALGAPA1	0.602509	4.4742	7.41702	3.70267e-12	2.36094e-10	Significantly downregulated (Adj-P<0.01)
ENSG00000173915.15_ATP5MD	ATP5MD	-0.634427	6.20472	-7.41912	3.65719e-12	2.34134e-10	Significantly downregulated (Adj-P<0.01)
ENSG00000100065.14_CARD10	CARD10	-0.673982	2.9085	-7.40292	4.02213e-12	2.55437e-10	Significantly downregulated (Adj-P<0.01)
ENSG00000118412.12_CASP8AP2	CASP8AP2	0.631387	3.62982	7.39845	4.12884e-12	2.61169e-10	Significantly downregulated (Adj-P<0.01)
ENSG00000164938.13_TP53INP1	TP53INP1	0.667067	3.81133	7.39067	4.32162e-12	2.71203e-10	Significantly downregulated (Adj-P<0.01)
ENSG00000235560.3_AC002310.1	AC002310.1	-0.845361	-0.268097	-7.43305	3.3699e-12	2.18384e-10	Significantly downregulated (Adj-P<0.01)
ENSG00000023734.10_STRAP	STRAP	-0.333591	5.84887	-7.39622	4.18327e-12	2.63563e-10	Significantly downregulated (Adj-P<0.01)
ENSG00000152223.13_EPG5	EPG5	0.513767	4.7804	7.38466	4.47645e-12	2.79813e-10	Significantly downregulated (Adj-P<0.01)
ENSG00000188993.3_LRRC66	LRRC66	0.922538	2.8384	7.36613	4.98949e-12	3.07047e-10	Significantly downregulated (Adj-P<0.01)
ENSG00000109689.15_STIM2	STIM2	0.524612	3.19029	7.36822	4.9287e-12	3.04486e-10	Significantly downregulated (Adj-P<0.01)
ENSG00000165494.11_PCF11	PCF11	0.375982	5.20623	7.37765	4.66415e-12	2.89268e-10	Significantly downregulated (Adj-P<0.01)
ENSG00000175161.13_CADM2	CADM2	-0.911075	2.88181	-7.36343	5.06887e-12	3.09533e-10	Significantly downregulated (Adj-P<0.01)
ENSG00000178498.15_DTX3	DTX3	-0.538229	2.70174	-7.35196	5.42053e-12	3.27231e-10	Significantly downregulated (Adj-P<0.01)
ENSG00000151835.15_SACS	SACS	0.644122	5.56159	7.3641	5.04897e-12	3.09508e-10	Significantly downregulated (Adj-P<0.01)
ENSG00000163964.14_PIGX	PIGX	-0.446022	3.7101	-7.35682	5.26869e-12	3.20502e-10	Significantly downregulated (Adj-P<0.01)
ENSG00000170502.12_NUDT9	NUDT9	-0.301766	4.31491	-7.35448	5.34127e-12	3.23677e-10	Significantly downregulated (Adj-P<0.01)
ENSG00000198053.11_SIRPA	SIRPA	0.829655	3.15775	7.33079	6.13387e-12	3.64747e-10	Significantly downregulated (Adj-P<0.01)
ENSG00000112282.17_MED23	MED23	0.522346	3.97102	7.333	6.05513e-12	3.61418e-10	Significantly downregulated (Adj-P<0.01)
ENSG00000109046.14_WSB1	WSB1	0.469371	6.0268	7.34102	5.77826e-12	3.47505e-10	Significantly downregulated (Adj-P<0.01)
ENSG00000224660.1_SH3BP5-AS1	SH3BP5-AS1	0.60624	4.40268	7.33334	6.04315e-12	3.61418e-10	Significantly downregulated (Adj-P<0.01)
ENSG00000228492.2_RAB11FIP1P1	RAB11FIP1P1	1.46488	0.208025	7.44637	3.11602e-12	2.03593e-10	Significantly downregulated (Adj-P<0.01)
ENSG00000004779.9_NDUFAB1	NDUFAB1	-0.515314	6.7251	-7.32638	6.29355e-12	3.72846e-10	Significantly downregulated (Adj-P<0.01)
ENSG00000108666.9_C17orf75	C17orf75	-0.399807	3.85206	-7.31395	6.76664e-12	3.99383e-10	Significantly downregulated (Adj-P<0.01)
ENSG00000248923.1_MTND5P11	MTND5P11	-0.994214	0.50569	-7.30963	6.93936e-12	4.0806e-10	Significantly downregulated (Adj-P<0.01)
ENSG00000109323.9_MANBA	MANBA	0.580802	2.49879	7.28887	7.83069e-12	4.52101e-10	Significantly downregulated (Adj-P<0.01)
ENSG00000182308.6_DCAF4L1	DCAF4L1	1.2514	0.123403	7.38242	4.53558e-12	2.82398e-10	Significantly downregulated (Adj-P<0.01)
ENSG00000048740.18_CELF2	CELF2	0.686931	4.33686	7.29997	7.34083e-12	4.26925e-10	Significantly downregulated (Adj-P<0.01)
ENSG00000135837.15_CEP350	CEP350	0.643798	5.73045	7.30145	7.27766e-12	4.26374e-10	Significantly downregulated (Adj-P<0.01)
ENSG00000075539.14_FRYL	FRYL	0.471977	3.84024	7.28372	8.06903e-12	4.60835e-10	Significantly downregulated (Adj-P<0.01)
ENSG00000125388.19_GRK4	GRK4	-0.471494	1.83274	-7.27222	8.62671e-12	4.87424e-10	Significantly downregulated (Adj-P<0.01)
ENSG00000185722.17_ANKFY1	ANKFY1	0.542864	5.15868	7.28931	7.81079e-12	4.52101e-10	Significantly downregulated (Adj-P<0.01)
ENSG00000116704.7_SLC35D1	SLC35D1	0.576216	3.98509	7.27925	8.2814e-12	4.69585e-10	Significantly downregulated (Adj-P<0.01)
ENSG00000109670.14_FBXW7	FBXW7	0.467368	5.47022	7.28784	7.87793e-12	4.53181e-10	Significantly downregulated (Adj-P<0.01)
ENSG00000163673.7_DCLK3	DCLK3	-1.0357	-0.049232	-7.30038	7.32334e-12	4.26925e-10	Significantly downregulated (Adj-P<0.01)
ENSG00000103121.8_CMC2	CMC2	-0.540271	3.94764	-7.28245	8.12859e-12	4.62572e-10	Significantly downregulated (Adj-P<0.01)
ENSG00000137547.8_MRPL15	MRPL15	-0.44851	5.93187	-7.28376	8.06694e-12	4.60835e-10	Significantly downregulated (Adj-P<0.01)
ENSG00000089876.11_DHX32	DHX32	-0.333116	3.71929	-7.27094	8.69117e-12	4.89325e-10	Significantly downregulated (Adj-P<0.01)
ENSG00000196263.7_ZNF471	ZNF471	0.635183	2.60927	7.25671	9.4398e-12	5.2588e-10	Significantly downregulated (Adj-P<0.01)
ENSG00000278129.1_ZNF8	ZNF8	-0.845853	1.31114	-7.24397	1.01639e-11	5.5838e-10	Significantly downregulated (Adj-P<0.01)
ENSG00000185630.18_PBX1	PBX1	0.522222	5.83876	7.26373	9.06253e-12	5.08431e-10	Significantly downregulated (Adj-P<0.01)
ENSG00000125166.12_GOT2	GOT2	-0.616738	8.61347	-7.24723	9.97325e-12	5.4981e-10	Significantly downregulated (Adj-P<0.01)
ENSG00000070540.12_WIPI1	WIPI1	-0.554028	5.61658	-7.25701	9.42335e-12	5.2588e-10	Significantly downregulated (Adj-P<0.01)
ENSG00000188582.8_PAQR9	PAQR9	-1.17925	1.03047	-7.23604	1.06422e-11	5.80637e-10	Significantly downregulated (Adj-P<0.01)
ENSG00000136270.13_TBRG4	TBRG4	-0.385012	5.47714	-7.25056	9.78264e-12	5.41181e-10	Significantly downregulated (Adj-P<0.01)
ENSG00000171497.4_PPID	PPID	-0.323018	5.33958	-7.25085	9.76653e-12	5.41181e-10	Significantly downregulated (Adj-P<0.01)
ENSG00000185246.17_PRPF39	PRPF39	0.515608	4.21266	7.24005	1.03976e-11	5.69251e-10	Significantly downregulated (Adj-P<0.01)
ENSG00000177576.11_C18orf32	C18orf32	-0.371763	3.93451	-7.22743	1.11865e-11	6.06169e-10	Significantly downregulated (Adj-P<0.01)
ENSG00000091483.6_FH	FH	-0.401708	6.72251	-7.22853	1.1115e-11	6.04361e-10	Significantly downregulated (Adj-P<0.01)
ENSG00000100296.13_THOC5	THOC5	-0.364818	4.38098	-7.22647	1.12484e-11	6.07453e-10	Significantly downregulated (Adj-P<0.01)
ENSG00000163528.12_CHCHD4	CHCHD4	-0.435966	3.60777	-7.22101	1.161e-11	6.24855e-10	Significantly downregulated (Adj-P<0.01)
ENSG00000137692.11_DCUN1D5	DCUN1D5	-0.460923	3.69496	-7.21707	1.18775e-11	6.35703e-10	Significantly downregulated (Adj-P<0.01)
ENSG00000262814.7_MRPL12	MRPL12	-0.656172	5.8134	-7.21687	1.18917e-11	6.35703e-10	Significantly downregulated (Adj-P<0.01)
ENSG00000120008.15_WDR11	WDR11	0.448542	4.00867	7.20801	1.25166e-11	6.66864e-10	Significantly downregulated (Adj-P<0.01)
ENSG00000150768.15_DLAT	DLAT	-0.561507	6.56189	-7.20369	1.28335e-11	6.81466e-10	Significantly downregulated (Adj-P<0.01)
ENSG00000138193.15_PLCE1	PLCE1	1.08051	3.04684	7.18182	1.45613e-11	7.58991e-10	Significantly downregulated (Adj-P<0.01)
ENSG00000218336.8_TENM3	TENM3	0.884188	3.14797	7.17805	1.48813e-11	7.72128e-10	Significantly downregulated (Adj-P<0.01)
ENSG00000116455.13_WDR77	WDR77	-0.3476	4.71601	-7.19827	1.3242e-11	6.9848e-10	Significantly downregulated (Adj-P<0.01)
ENSG00000115464.14_USP34	USP34	0.463354	5.71511	7.18542	1.42619e-11	7.49786e-10	Significantly downregulated (Adj-P<0.01)
ENSG00000159140.19_SON	SON	0.431069	7.17085	7.18159	1.45804e-11	7.58991e-10	Significantly downregulated (Adj-P<0.01)
ENSG00000111906.17_HDDC2	HDDC2	-0.536967	5.06518	-7.18414	1.43673e-11	7.52838e-10	Significantly downregulated (Adj-P<0.01)
ENSG00000085231.13_AK6	AK6	-0.328419	3.91037	-7.17423	1.52134e-11	7.86786e-10	Significantly downregulated (Adj-P<0.01)
ENSG00000156467.9_UQCRB	UQCRB	-0.533789	8.45936	-7.16939	1.56439e-11	8.03812e-10	Significantly downregulated (Adj-P<0.01)
ENSG00000082258.12_CCNT2	CCNT2	0.467097	4.57299	7.17288	1.53324e-11	7.90363e-10	Significantly downregulated (Adj-P<0.01)
ENSG00000188994.12_ZNF292	ZNF292	0.580055	4.03915	7.16324	1.62088e-11	8.30154e-10	Significantly downregulated (Adj-P<0.01)
ENSG00000181284.2_TMEM102	TMEM102	-1.19614	0.0387061	-7.15615	1.68844e-11	8.51215e-10	Significantly downregulated (Adj-P<0.01)
ENSG00000118007.12_STAG1	STAG1	0.545824	4.87996	7.16116	1.64037e-11	8.37432e-10	Significantly downregulated (Adj-P<0.01)
ENSG00000135164.18_DMTF1	DMTF1	0.438145	4.46029	7.1595	1.6562e-11	8.42805e-10	Significantly downregulated (Adj-P<0.01)
ENSG00000166689.15_PLEKHA7	PLEKHA7	0.872918	1.19202	7.14686	1.78117e-11	8.83741e-10	Significantly downregulated (Adj-P<0.01)
ENSG00000120438.11_TCP1	TCP1	-0.274085	6.47778	-7.15833	1.66733e-11	8.45758e-10	Significantly downregulated (Adj-P<0.01)
ENSG00000154518.9_ATP5MC3	ATP5MC3	-0.683874	7.43762	-7.15203	1.72895e-11	8.68689e-10	Significantly downregulated (Adj-P<0.01)
ENSG00000107929.14_LARP4B	LARP4B	0.334408	6.47847	7.15611	1.68881e-11	8.51215e-10	Significantly downregulated (Adj-P<0.01)
ENSG00000163714.17_U2SURP	U2SURP	0.493122	5.73429	7.14816	1.7679e-11	8.82673e-10	Significantly downregulated (Adj-P<0.01)
ENSG00000108788.11_MLX	MLX	-0.30132	5.4047	-7.14689	1.78094e-11	8.83741e-10	Significantly downregulated (Adj-P<0.01)
ENSG00000203644.3_AC083799.1	AC083799.1	-0.943822	-0.658142	-7.19829	1.32401e-11	6.9848e-10	Significantly downregulated (Adj-P<0.01)
ENSG00000083896.12_YTHDC1	YTHDC1	0.352798	5.45007	7.14149	1.83717e-11	9.08683e-10	Significantly downregulated (Adj-P<0.01)
ENSG00000027001.9_MIPEP	MIPEP	-0.485897	3.38863	-7.13123	1.94874e-11	9.579e-10	Significantly downregulated (Adj-P<0.01)
ENSG00000112983.17_BRD8	BRD8	0.41369	4.65795	7.13318	1.92706e-11	9.50183e-10	Significantly downregulated (Adj-P<0.01)
ENSG00000177606.6_JUN	JUN	0.686747	7.59418	7.12919	1.97172e-11	9.66206e-10	Significantly downregulated (Adj-P<0.01)
ENSG00000167874.6_TMEM88	TMEM88	-0.662239	1.92934	-7.10675	2.24295e-11	1.08446e-09	Significantly downregulated (Adj-P<0.01)
ENSG00000175556.16_LONRF3	LONRF3	1.05462	1.72495	7.0994	2.33961e-11	1.12223e-09	Significantly downregulated (Adj-P<0.01)
ENSG00000166902.4_MRPL16	MRPL16	-0.366789	4.9202	-7.11463	2.14377e-11	1.04728e-09	Significantly downregulated (Adj-P<0.01)
ENSG00000125772.12_GPCPD1	GPCPD1	-0.682137	4.0605	-7.11031	2.19761e-11	1.06701e-09	Significantly downregulated (Adj-P<0.01)
ENSG00000213593.9_TMX2	TMX2	-0.367414	4.38963	-7.11247	2.17055e-11	1.05711e-09	Significantly downregulated (Adj-P<0.01)
ENSG00000138658.15_ZGRF1	ZGRF1	0.892708	1.5329	7.09103	2.45459e-11	1.17384e-09	Significantly downregulated (Adj-P<0.01)
ENSG00000137714.2_FDX1	FDX1	-0.370923	4.70897	-7.10643	2.24719e-11	1.08446e-09	Significantly downregulated (Adj-P<0.01)
ENSG00000173660.11_UQCRH	UQCRH	-0.559004	6.90379	-7.10192	2.30606e-11	1.10949e-09	Significantly downregulated (Adj-P<0.01)
ENSG00000176124.12_DLEU1	DLEU1	-0.728648	1.1615	-7.06793	2.80174e-11	1.32786e-09	Significantly downregulated (Adj-P<0.01)
ENSG00000197780.9_TAF13	TAF13	-0.429985	4.40543	-7.08447	2.54861e-11	1.21514e-09	Significantly downregulated (Adj-P<0.01)
ENSG00000135972.8_MRPS9	MRPS9	-0.374451	5.36535	-7.07754	2.65185e-11	1.26058e-09	Significantly downregulated (Adj-P<0.01)
ENSG00000196821.9_C6orf106	C6orf106	-0.392897	8.16516	-7.0654	2.84255e-11	1.3392e-09	Significantly downregulated (Adj-P<0.01)
ENSG00000204564.11_C6orf136	C6orf136	-0.478642	4.30537	-7.06704	2.81609e-11	1.33069e-09	Significantly downregulated (Adj-P<0.01)
ENSG00000272512.1_AL645608.7	AL645608.7	-0.920917	0.580278	-7.04652	3.16647e-11	1.48182e-09	Significantly downregulated (Adj-P<0.01)
ENSG00000272886.5_DCP1A	DCP1A	0.377403	3.84865	7.04624	3.17167e-11	1.48182e-09	Significantly downregulated (Adj-P<0.01)
ENSG00000109390.11_NDUFC1	NDUFC1	-0.494671	6.30644	-7.04615	3.17326e-11	1.48182e-09	Significantly downregulated (Adj-P<0.01)
ENSG00000137504.13_CREBZF	CREBZF	0.439033	5.50238	7.04311	3.22881e-11	1.50334e-09	Significantly downregulated (Adj-P<0.01)
ENSG00000187118.13_CMC1	CMC1	-0.439051	3.41458	-7.03413	3.39866e-11	1.56862e-09	Significantly downregulated (Adj-P<0.01)
ENSG00000166432.14_ZMAT1	ZMAT1	0.702814	2.4308	7.01771	3.73227e-11	1.7077e-09	Significantly downregulated (Adj-P<0.01)
ENSG00000187942.11_LDLRAD2	LDLRAD2	-0.932387	0.636316	-7.01813	3.72327e-11	1.7077e-09	Significantly downregulated (Adj-P<0.01)
ENSG00000141385.9_AFG3L2	AFG3L2	-0.335823	6.93724	-7.03789	3.32651e-11	1.5443e-09	Significantly downregulated (Adj-P<0.01)
ENSG00000177200.17_CHD9	CHD9	0.57359	4.83437	7.03464	3.38874e-11	1.5686e-09	Significantly downregulated (Adj-P<0.01)
ENSG00000150347.15_ARID5B	ARID5B	0.941009	5.24257	7.02978	3.48406e-11	1.60338e-09	Significantly downregulated (Adj-P<0.01)
ENSG00000213390.10_ARHGAP19	ARHGAP19	0.520788	2.15414	6.99803	4.1749e-11	1.88822e-09	Significantly downregulated (Adj-P<0.01)
ENSG00000251322.7_SHANK3	SHANK3	-0.704622	5.4003	-7.00153	4.09256e-11	1.8565e-09	Significantly downregulated (Adj-P<0.01)
ENSG00000219481.10_NBPF1	NBPF1	0.738569	3.9198	6.98643	4.45938e-11	1.98881e-09	Significantly downregulated (Adj-P<0.01)
ENSG00000129204.16_USP6	USP6	1.10608	6.72861	6.99557	4.23355e-11	1.90238e-09	Significantly downregulated (Adj-P<0.01)
ENSG00000115541.10_HSPE1	HSPE1	-0.475619	4.83462	-6.99524	4.24162e-11	1.90238e-09	Significantly downregulated (Adj-P<0.01)
ENSG00000030066.13_NUP160	NUP160	0.430665	3.91886	6.98457	4.50689e-11	2.00437e-09	Significantly downregulated (Adj-P<0.01)
ENSG00000106771.12_TMEM245	TMEM245	0.583192	6.64348	6.9892	4.38973e-11	1.96326e-09	Significantly downregulated (Adj-P<0.01)
ENSG00000006625.17_GGCT	GGCT	-0.450794	3.65383	-6.9785	4.66516e-11	2.06467e-09	Significantly downregulated (Adj-P<0.01)
ENSG00000140876.11_NUDT7	NUDT7	-0.69946	0.764216	-6.96142	5.1401e-11	2.24202e-09	Significantly downregulated (Adj-P<0.01)
ENSG00000182162.10_P2RY8	P2RY8	-1.05715	-0.696622	-7.01237	3.84759e-11	1.75038e-09	Significantly downregulated (Adj-P<0.01)
ENSG00000182162.10_PAR_Y_P2RY8	PAR	-1.05715	-0.696622	-7.01237	3.84759e-11	1.75038e-09	Significantly downregulated (Adj-P<0.01)
ENSG00000010256.10_UQCRC1	UQCRC1	-0.457505	8.73945	-6.96839	4.94074e-11	2.16099e-09	Significantly downregulated (Adj-P<0.01)
ENSG00000101596.15_SMCHD1	SMCHD1	0.535776	4.63711	6.97542	4.74749e-11	2.08797e-09	Significantly downregulated (Adj-P<0.01)
ENSG00000135473.14_PAN2	PAN2	0.393426	5.22992	6.97837	4.6685e-11	2.06467e-09	Significantly downregulated (Adj-P<0.01)
ENSG00000277969.1_AC006449.6	AC006449.6	-0.686983	1.47742	-6.95208	5.41954e-11	2.31307e-09	Significantly downregulated (Adj-P<0.01)
ENSG00000065518.7_NDUFB4	NDUFB4	-0.407656	7.10711	-6.96993	4.89766e-11	2.14807e-09	Significantly downregulated (Adj-P<0.01)
ENSG00000198040.10_ZNF84	ZNF84	0.392161	3.94572	6.95549	5.31576e-11	2.28722e-09	Significantly downregulated (Adj-P<0.01)
ENSG00000212907.2_MT-ND4L	MT-ND4L	-1.07183	9.21731	-6.94879	5.52176e-11	2.35038e-09	Significantly downregulated (Adj-P<0.01)
ENSG00000132305.20_IMMT	IMMT	-0.449022	7.08116	-6.95843	5.22804e-11	2.26791e-09	Significantly downregulated (Adj-P<0.01)
ENSG00000165775.17_FUNDC2	FUNDC2	-0.312966	7.19412	-6.95609	5.29791e-11	2.28573e-09	Significantly downregulated (Adj-P<0.01)
ENSG00000104517.12_UBR5	UBR5	0.459035	5.75882	6.96085	5.15662e-11	2.24306e-09	Significantly downregulated (Adj-P<0.01)
ENSG00000121390.18_PSPC1	PSPC1	0.318368	4.08516	6.95214	5.41771e-11	2.31307e-09	Significantly downregulated (Adj-P<0.01)
ENSG00000145734.18_BDP1	BDP1	0.629973	4.24867	6.94419	5.66745e-11	2.38795e-09	Significantly downregulated (Adj-P<0.01)
ENSG00000166797.10_CIAO2A	CIAO2A	-0.57024	4.5519	-6.95345	5.37757e-11	2.30756e-09	Significantly downregulated (Adj-P<0.01)
ENSG00000155561.14_NUP205	NUP205	0.395386	4.06799	6.9441	5.6702e-11	2.38795e-09	Significantly downregulated (Adj-P<0.01)
ENSG00000198804.2_MT-CO1	MT-CO1	-0.762327	15.1763	-6.92468	6.32925e-11	2.61012e-09	Significantly downregulated (Adj-P<0.01)
ENSG00000113273.16_ARSB	ARSB	-0.681135	2.15874	-6.92583	6.2883e-11	2.60481e-09	Significantly downregulated (Adj-P<0.01)
ENSG00000164292.12_RHOBTB3	RHOBTB3	0.436723	5.07432	6.94647	5.59472e-11	2.37507e-09	Significantly downregulated (Adj-P<0.01)
ENSG00000069667.15_RORA	RORA	0.766137	5.85442	6.94482	5.64724e-11	2.38795e-09	Significantly downregulated (Adj-P<0.01)
ENSG00000139697.13_SBNO1	SBNO1	0.395236	5.05715	6.94226	5.72962e-11	2.40659e-09	Significantly downregulated (Adj-P<0.01)
ENSG00000148400.10_NOTCH1	NOTCH1	-0.643931	3.77075	-6.93897	5.83759e-11	2.44547e-09	Significantly downregulated (Adj-P<0.01)
ENSG00000108848.15_LUC7L3	LUC7L3	0.397401	6.96603	6.9362	5.92986e-11	2.47759e-09	Significantly downregulated (Adj-P<0.01)
ENSG00000059588.9_TARBP1	TARBP1	0.45164	5.03215	6.93551	5.95298e-11	2.48072e-09	Significantly downregulated (Adj-P<0.01)
ENSG00000184508.11_HDDC3	HDDC3	-0.583093	2.43364	-6.9141	6.71939e-11	2.75669e-09	Significantly downregulated (Adj-P<0.01)
ENSG00000090263.15_MRPS33	MRPS33	-0.434945	5.17629	-6.9299	6.14512e-11	2.55409e-09	Significantly downregulated (Adj-P<0.01)
ENSG00000130307.11_USHBP1	USHBP1	-0.609201	2.58817	-6.90784	6.96112e-11	2.8485e-09	Significantly downregulated (Adj-P<0.01)
ENSG00000135439.11_AGAP2	AGAP2	-0.695606	4.02633	-6.91513	6.68056e-11	2.74785e-09	Significantly downregulated (Adj-P<0.01)
ENSG00000110436.12_SLC1A2	SLC1A2	2.04536	-0.538566	7.14914	1.75799e-11	8.80492e-10	Significantly downregulated (Adj-P<0.01)
ENSG00000129317.14_PUS7L	PUS7L	0.612243	2.7052	6.88779	7.79533e-11	3.11754e-09	Significantly downregulated (Adj-P<0.01)
ENSG00000121410.11_A1BG	A1BG	-1.33807	-1.24849	-6.95634	5.29027e-11	2.28573e-09	Significantly downregulated (Adj-P<0.01)
ENSG00000108219.14_TSPAN14	TSPAN14	-0.505262	3.91166	-6.90201	7.19438e-11	2.92136e-09	Significantly downregulated (Adj-P<0.01)
ENSG00000106991.13_ENG	ENG	-0.653984	5.09743	-6.90718	6.98731e-11	2.85186e-09	Significantly downregulated (Adj-P<0.01)
ENSG00000164089.8_ETNPPL	ETNPPL	-1.69616	-0.801524	-6.9255	6.29997e-11	2.60481e-09	Significantly downregulated (Adj-P<0.01)
ENSG00000196208.13_GREB1	GREB1	-0.826372	2.41416	-6.88512	7.91341e-11	3.15681e-09	Significantly downregulated (Adj-P<0.01)
ENSG00000133226.16_SRRM1	SRRM1	0.387099	6.31791	6.90214	7.18904e-11	2.92136e-09	Significantly downregulated (Adj-P<0.01)
ENSG00000161970.14_RPL26	RPL26	-0.371036	7.71475	-6.89272	7.58146e-11	3.0551e-09	Significantly downregulated (Adj-P<0.01)
ENSG00000072163.19_LIMS2	LIMS2	-0.516791	4.17462	-6.89538	7.46863e-11	3.02222e-09	Significantly downregulated (Adj-P<0.01)
ENSG00000138777.19_PPA2	PPA2	-0.443858	4.33127	-6.89509	7.48084e-11	3.02222e-09	Significantly downregulated (Adj-P<0.01)
ENSG00000138867.16_GUCD1	GUCD1	-0.407451	6.78338	-6.8903	7.68587e-11	3.08153e-09	Significantly downregulated (Adj-P<0.01)
ENSG00000197565.15_COL4A6	COL4A6	0.805549	1.87989	6.86681	8.77321e-11	3.44783e-09	Significantly downregulated (Adj-P<0.01)
ENSG00000166704.11_ZNF606	ZNF606	0.424082	2.93768	6.87156	8.54197e-11	3.37365e-09	Significantly downregulated (Adj-P<0.01)
ENSG00000109919.9_MTCH2	MTCH2	-0.361518	5.55494	-6.89119	7.64728e-11	3.07382e-09	Significantly downregulated (Adj-P<0.01)
ENSG00000107738.19_VSIR	VSIR	-0.711913	3.453	-6.88409	7.95959e-11	3.16728e-09	Significantly downregulated (Adj-P<0.01)
ENSG00000131055.4_COX4I2	COX4I2	-0.750604	-0.019844	-6.87743	8.26395e-11	3.27199e-09	Significantly downregulated (Adj-P<0.01)
ENSG00000228253.1_MT-ATP8	MT-ATP8	-1.47508	6.31136	-6.87756	8.2582e-11	3.27199e-09	Significantly downregulated (Adj-P<0.01)
ENSG00000174951.11_FUT1	FUT1	-0.841066	0.620985	-6.85276	9.49491e-11	3.68584e-09	Significantly downregulated (Adj-P<0.01)
ENSG00000172053.17_QARS	QARS	-0.334617	6.77119	-6.86693	8.76764e-11	3.44783e-09	Significantly downregulated (Adj-P<0.01)
ENSG00000198832.10_SELENOM	SELENOM	0.916403	3.01995	6.84706	9.80427e-11	3.77821e-09	Significantly downregulated (Adj-P<0.01)
ENSG00000171988.18_JMJD1C	JMJD1C	0.537992	4.80108	6.86163	9.03321e-11	3.53623e-09	Significantly downregulated (Adj-P<0.01)
ENSG00000210151.2_MT-TS1	MT-TS1	-1.5405	-2.79618	-6.97662	4.71502e-11	2.07945e-09	Significantly downregulated (Adj-P<0.01)
ENSG00000119013.8_NDUFB3	NDUFB3	-0.522478	6.36477	-6.86144	9.0427e-11	3.53623e-09	Significantly downregulated (Adj-P<0.01)
ENSG00000122033.14_MTIF3	MTIF3	-0.365098	4.81793	-6.86085	9.07279e-11	3.53928e-09	Significantly downregulated (Adj-P<0.01)
ENSG00000177374.12_HIC1	HIC1	-0.689164	3.93545	-6.85106	9.58621e-11	3.70317e-09	Significantly downregulated (Adj-P<0.01)
ENSG00000124177.14_CHD6	CHD6	0.522282	4.44942	6.84648	9.83642e-11	3.78143e-09	Significantly downregulated (Adj-P<0.01)
ENSG00000276045.3_ORAI1	ORAI1	-0.531095	4.7739	-6.85129	9.57379e-11	3.70317e-09	Significantly downregulated (Adj-P<0.01)
ENSG00000116141.15_MARK1	MARK1	-0.872533	0.841655	-6.82189	1.12922e-10	4.29945e-09	Significantly downregulated (Adj-P<0.01)
ENSG00000114127.10_XRN1	XRN1	0.540051	4.81064	6.84365	9.99406e-11	3.83275e-09	Significantly downregulated (Adj-P<0.01)
ENSG00000213462.4_ERV3-1	ERV3-1	1.4391	0.877731	6.85736	9.25255e-11	3.60056e-09	Significantly downregulated (Adj-P<0.01)
ENSG00000165389.6_SPTSSA	SPTSSA	-0.456435	3.72454	-6.83438	1.05279e-10	4.02775e-09	Significantly downregulated (Adj-P<0.01)
ENSG00000074181.8_NOTCH3	NOTCH3	-0.69867	5.89087	-6.81836	1.1518e-10	4.37492e-09	Significantly downregulated (Adj-P<0.01)
ENSG00000164190.17_NIPBL	NIPBL	0.418374	4.6552	6.81113	1.19946e-10	4.54508e-09	Significantly downregulated (Adj-P<0.01)
ENSG00000103042.8_SLC38A7	SLC38A7	-0.489381	3.26855	-6.80152	1.26577e-10	4.78493e-09	Significantly downregulated (Adj-P<0.01)
ENSG00000114107.8_CEP70	CEP70	-0.439724	3.18469	-6.79248	1.33148e-10	4.98581e-09	Significantly downregulated (Adj-P<0.01)
ENSG00000155755.18_TMEM237	TMEM237	0.427485	4.31578	6.79716	1.29704e-10	4.87987e-09	Significantly downregulated (Adj-P<0.01)
ENSG00000156515.23_HK1	HK1	-0.411039	6.99792	-6.79975	1.27838e-10	4.82111e-09	Significantly downregulated (Adj-P<0.01)
ENSG00000130787.13_HIP1R	HIP1R	-0.627647	2.79525	-6.78542	1.38512e-10	5.15023e-09	Significantly downregulated (Adj-P<0.01)
ENSG00000136522.13_MRPL47	MRPL47	-0.439539	3.85737	-6.79598	1.30563e-10	4.9006e-09	Significantly downregulated (Adj-P<0.01)
ENSG00000181690.7_PLAG1	PLAG1	1.96526	1.12037	6.82395	1.11625e-10	4.26028e-09	Significantly downregulated (Adj-P<0.01)
ENSG00000107020.9_PLGRKT	PLGRKT	-0.42272	3.76516	-6.78831	1.36286e-10	5.07938e-09	Significantly downregulated (Adj-P<0.01)
ENSG00000184076.13_UQCR10	UQCR10	-0.519604	6.59118	-6.78949	1.35394e-10	5.05799e-09	Significantly downregulated (Adj-P<0.01)
ENSG00000058272.18_PPP1R12A	PPP1R12A	0.416878	4.96041	6.78283	1.40526e-10	5.21292e-09	Significantly downregulated (Adj-P<0.01)
ENSG00000156709.13_AIFM1	AIFM1	-0.395479	5.56836	-6.78208	1.41122e-10	5.22284e-09	Significantly downregulated (Adj-P<0.01)
ENSG00000146701.11_MDH2	MDH2	-0.399942	8.55536	-6.76941	1.51473e-10	5.54132e-09	Significantly downregulated (Adj-P<0.01)
ENSG00000145687.16_SSBP2	SSBP2	0.460583	4.15848	6.772	1.49295e-10	5.49968e-09	Significantly downregulated (Adj-P<0.01)
ENSG00000240303.7_ACAD11	ACAD11	0.387573	3.87134	6.76882	1.51969e-10	5.54669e-09	Significantly downregulated (Adj-P<0.01)
ENSG00000167863.11_ATP5PD	ATP5PD	-0.409187	7.19135	-6.77439	1.47317e-10	5.43944e-09	Significantly downregulated (Adj-P<0.01)
ENSG00000162601.9_MYSM1	MYSM1	0.56384	4.67553	6.77017	1.50826e-10	5.53042e-09	Significantly downregulated (Adj-P<0.01)
ENSG00000093144.18_ECHDC1	ECHDC1	-0.336143	4.80249	-6.77041	1.50627e-10	5.53042e-09	Significantly downregulated (Adj-P<0.01)
ENSG00000055609.17_KMT2C	KMT2C	0.577234	6.25847	6.76621	1.54196e-10	5.61507e-09	Significantly downregulated (Adj-P<0.01)
ENSG00000260855.1_AL591848.4	AL591848.4	0.942973	1.1069	6.74373	1.74791e-10	6.29288e-09	Significantly downregulated (Adj-P<0.01)
ENSG00000094916.15_CBX5	CBX5	0.426907	4.86634	6.76019	1.59471e-10	5.77438e-09	Significantly downregulated (Adj-P<0.01)
ENSG00000166503.8_HDGFL3	HDGFL3	0.659293	3.43299	6.74296	1.75546e-10	6.30576e-09	Significantly downregulated (Adj-P<0.01)
ENSG00000004961.14_HCCS	HCCS	-0.391782	4.8409	-6.75997	1.59662e-10	5.77438e-09	Significantly downregulated (Adj-P<0.01)
ENSG00000139263.11_LRIG3	LRIG3	0.688596	2.47736	6.72601	1.92913e-10	6.86743e-09	Significantly downregulated (Adj-P<0.01)
ENSG00000091656.16_ZFHX4	ZFHX4	0.619463	3.94023	6.73617	1.8231e-10	6.53392e-09	Significantly downregulated (Adj-P<0.01)
ENSG00000169962.4_TAS1R3	TAS1R3	-0.691802	1.00014	-6.71949	2.00038e-10	7.05778e-09	Significantly downregulated (Adj-P<0.01)
ENSG00000006695.10_COX10	COX10	-0.453743	5.0404	-6.74892	1.69815e-10	6.12761e-09	Significantly downregulated (Adj-P<0.01)
ENSG00000119778.14_ATAD2B	ATAD2B	0.541419	2.5326	6.70781	2.13452e-10	7.43195e-09	Significantly downregulated (Adj-P<0.01)
ENSG00000067900.7_ROCK1	ROCK1	0.436551	4.23188	6.72383	1.95273e-10	6.92043e-09	Significantly downregulated (Adj-P<0.01)
ENSG00000204568.11_MRPS18B	MRPS18B	-0.370742	6.20783	-6.7316	1.87003e-10	6.68705e-09	Significantly downregulated (Adj-P<0.01)
ENSG00000130584.10_ZBTB46	ZBTB46	-0.500268	2.64783	-6.71153	2.09093e-10	7.32841e-09	Significantly downregulated (Adj-P<0.01)
ENSG00000198722.14_UNC13B	UNC13B	0.64564	6.4154	6.72759	1.91227e-10	6.82272e-09	Significantly downregulated (Adj-P<0.01)
ENSG00000066739.11_ATG2B	ATG2B	0.453358	5.00234	6.72395	1.95144e-10	6.92043e-09	Significantly downregulated (Adj-P<0.01)
ENSG00000114933.15_INO80D	INO80D	0.507605	4.24359	6.71667	2.03204e-10	7.13775e-09	Significantly downregulated (Adj-P<0.01)
ENSG00000267508.5_ZNF285	ZNF285	0.740332	1.22175	6.70064	2.22118e-10	7.64981e-09	Significantly downregulated (Adj-P<0.01)
ENSG00000174132.8_FAM174A	FAM174A	-0.356301	4.14896	-6.71857	2.01061e-10	7.07815e-09	Significantly downregulated (Adj-P<0.01)
ENSG00000163071.10_SPATA18	SPATA18	1.48954	0.505117	6.76213	1.57754e-10	5.7315e-09	Significantly downregulated (Adj-P<0.01)
ENSG00000198840.2_MT-ND3	MT-ND3	-0.943034	11.7881	-6.69367	2.30885e-10	7.89855e-09	Significantly downregulated (Adj-P<0.01)
ENSG00000128654.13_MTX2	MTX2	-0.365839	4.82344	-6.71969	1.99817e-10	7.05778e-09	Significantly downregulated (Adj-P<0.01)
ENSG00000253710.3_ALG11	ALG11	0.707248	2.26683	6.68664	2.40061e-10	8.12675e-09	Significantly downregulated (Adj-P<0.01)
ENSG00000162600.11_OMA1	OMA1	-0.341003	3.84133	-6.71007	2.1079e-10	7.37163e-09	Significantly downregulated (Adj-P<0.01)
ENSG00000117480.15_FAAH	FAAH	0.617249	3.75966	6.70069	2.22055e-10	7.64981e-09	Significantly downregulated (Adj-P<0.01)
ENSG00000100201.20_DDX17	DDX17	0.432346	8.76843	6.69914	2.23982e-10	7.68288e-09	Significantly downregulated (Adj-P<0.01)
ENSG00000125967.16_NECAB3	NECAB3	-0.419223	5.41217	-6.70863	2.12484e-10	7.41453e-09	Significantly downregulated (Adj-P<0.01)
ENSG00000112739.16_PRPF4B	PRPF4B	0.385252	5.67189	6.70731	2.14041e-10	7.43618e-09	Significantly downregulated (Adj-P<0.01)
ENSG00000133619.17_KRBA1	KRBA1	-0.636163	2.63585	-6.6876	2.38782e-10	8.10074e-09	Significantly downregulated (Adj-P<0.01)
ENSG00000259976.3_AC093010.3	AC093010.3	0.69414	5.75844	6.70466	2.17218e-10	7.53006e-09	Significantly downregulated (Adj-P<0.01)
ENSG00000213619.9_NDUFS3	NDUFS3	-0.502753	6.55346	-6.7007	2.22046e-10	7.64981e-09	Significantly downregulated (Adj-P<0.01)
ENSG00000177239.14_MAN1B1	MAN1B1	0.397257	4.54835	6.69909	2.24046e-10	7.68288e-09	Significantly downregulated (Adj-P<0.01)
ENSG00000167815.11_PRDX2	PRDX2	-0.419723	7.34684	-6.69332	2.3133e-10	7.89855e-09	Significantly downregulated (Adj-P<0.01)
ENSG00000120093.11_HOXB3	HOXB3	-0.630243	2.47863	-6.67571	2.55051e-10	8.52516e-09	Significantly downregulated (Adj-P<0.01)
ENSG00000167178.15_ISLR2	ISLR2	-1.02571	0.356474	-6.66607	2.69032e-10	8.95477e-09	Significantly downregulated (Adj-P<0.01)
ENSG00000103064.14_SLC7A6	SLC7A6	0.708658	5.6254	6.69226	2.32695e-10	7.92812e-09	Significantly downregulated (Adj-P<0.01)
ENSG00000119535.17_CSF3R	CSF3R	-2.04286	0.0213569	-6.67038	2.62688e-10	8.76196e-09	Significantly downregulated (Adj-P<0.01)
ENSG00000108819.10_PPP1R9B	PPP1R9B	-0.534051	3.9847	-6.68036	2.48557e-10	8.37865e-09	Significantly downregulated (Adj-P<0.01)
ENSG00000173918.14_C1QTNF1	C1QTNF1	-0.729191	2.77399	-6.66499	2.70646e-10	8.98965e-09	Significantly downregulated (Adj-P<0.01)
ENSG00000273540.3_AGBL1	AGBL1	-0.870325	4.81598	-6.68048	2.4839e-10	8.37865e-09	Significantly downregulated (Adj-P<0.01)
ENSG00000145949.10_MYLK4	MYLK4	-1.636	4.08381	-6.67785	2.52042e-10	8.46019e-09	Significantly downregulated (Adj-P<0.01)
ENSG00000183426.16_NPIPA1	NPIPA1	0.452187	5.99272	6.67587	2.54824e-10	8.52516e-09	Significantly downregulated (Adj-P<0.01)
ENSG00000164919.10_COX6C	COX6C	-0.546394	7.18233	-6.66324	2.73277e-10	9.05807e-09	Significantly downregulated (Adj-P<0.01)
ENSG00000241837.6_ATP5PO	ATP5PO	-0.440474	7.62881	-6.65713	2.8266e-10	9.33015e-09	Significantly downregulated (Adj-P<0.01)
ENSG00000185658.13_BRWD1	BRWD1	0.40564	5.29768	6.65866	2.80289e-10	9.27114e-09	Significantly downregulated (Adj-P<0.01)
ENSG00000140990.14_NDUFB10	NDUFB10	-0.52448	7.41089	-6.64672	2.99401e-10	9.8418e-09	Significantly downregulated (Adj-P<0.01)
ENSG00000102931.7_ARL2BP	ARL2BP	-0.3264	3.95089	-6.64319	3.05296e-10	1.00149e-08	Significantly downregulated (Adj-P<0.01)
ENSG00000130159.13_ECSIT	ECSIT	-0.517332	5.95221	-6.64746	2.9819e-10	9.82232e-09	Significantly downregulated (Adj-P<0.01)
ENSG00000132541.10_RIDA	RIDA	-0.33642	3.57944	-6.63861	3.13124e-10	1.02294e-08	Significantly downregulated (Adj-P<0.01)
ENSG00000112039.4_FANCE	FANCE	0.811745	3.21043	6.62404	3.39326e-10	1.09502e-08	Significantly downregulated (Adj-P<0.01)
ENSG00000007402.11_CACNA2D2	CACNA2D2	0.650046	1.40342	6.6129	3.60815e-10	1.162e-08	Significantly downregulated (Adj-P<0.01)
ENSG00000178502.5_KLHL11	KLHL11	0.77617	1.45366	6.61212	3.62367e-10	1.16293e-08	Significantly downregulated (Adj-P<0.01)
ENSG00000157259.7_GATAD1	GATAD1	0.362936	4.17773	6.62993	3.28477e-10	1.06651e-08	Significantly downregulated (Adj-P<0.01)
ENSG00000124172.9_ATP5F1E	ATP5F1E	-0.565943	6.24005	-6.63424	3.20769e-10	1.04362e-08	Significantly downregulated (Adj-P<0.01)
ENSG00000023697.12_DERA	DERA	-0.359577	3.52209	-6.62428	3.38887e-10	1.09502e-08	Significantly downregulated (Adj-P<0.01)
ENSG00000106853.19_PTGR1	PTGR1	-0.579124	2.61265	-6.61112	3.64368e-10	1.16635e-08	Significantly downregulated (Adj-P<0.01)
ENSG00000047662.4_FAM184B	FAM184B	2.49746	2.56118	6.59525	3.97628e-10	1.26011e-08	Significantly downregulated (Adj-P<0.01)
ENSG00000111669.14_TPI1	TPI1	-0.591249	9.29184	-6.60929	3.68065e-10	1.17345e-08	Significantly downregulated (Adj-P<0.01)
ENSG00000264490.3_BX640514.1	BX640514.1	-1.17819	2.54293	-6.60943	3.67765e-10	1.17345e-08	Significantly downregulated (Adj-P<0.01)
ENSG00000075336.11_TIMM21	TIMM21	-0.368058	5.33752	-6.62466	3.38164e-10	1.09502e-08	Significantly downregulated (Adj-P<0.01)
ENSG00000121988.17_ZRANB3	ZRANB3	0.569901	1.83149	6.58812	4.13514e-10	1.30744e-08	Significantly downregulated (Adj-P<0.01)
ENSG00000249464.5_LINC01091	LINC01091	1.70461	0.437917	6.63536	3.18782e-10	1.03928e-08	Significantly downregulated (Adj-P<0.01)
ENSG00000164120.13_HPGD	HPGD	1.81333	0.776376	6.64058	3.09729e-10	1.01393e-08	Significantly downregulated (Adj-P<0.01)
ENSG00000165029.15_ABCA1	ABCA1	0.960516	4.88101	6.61202	3.6257e-10	1.16293e-08	Significantly downregulated (Adj-P<0.01)
ENSG00000078403.16_MLLT10	MLLT10	0.44127	4.25183	6.60683	3.73074e-10	1.18703e-08	Significantly downregulated (Adj-P<0.01)
ENSG00000165617.14_DACT1	DACT1	1.7494	1.47201	6.58781	4.1421e-10	1.30744e-08	Significantly downregulated (Adj-P<0.01)
ENSG00000178977.3_LINC00324	LINC00324	1.05138	-0.70857	6.67922	2.50134e-10	8.41394e-09	Significantly downregulated (Adj-P<0.01)
ENSG00000133858.15_ZFC3H1	ZFC3H1	0.460346	3.92393	6.58525	4.20092e-10	1.32337e-08	Significantly downregulated (Adj-P<0.01)
ENSG00000058063.15_ATP11B	ATP11B	0.451306	3.9202	6.57569	4.4274e-10	1.38102e-08	Significantly downregulated (Adj-P<0.01)
ENSG00000078967.12_UBE2D4	UBE2D4	-0.309467	6.08622	-6.58275	4.25887e-10	1.33633e-08	Significantly downregulated (Adj-P<0.01)
ENSG00000188529.14_SRSF10	SRSF10	0.426337	5.53123	6.58313	4.25005e-10	1.3362e-08	Significantly downregulated (Adj-P<0.01)
ENSG00000117118.9_SDHB	SDHB	-0.430703	6.83789	-6.57857	4.3579e-10	1.36202e-08	Significantly downregulated (Adj-P<0.01)
ENSG00000100100.12_PIK3IP1	PIK3IP1	0.898618	3.87314	6.57036	4.55885e-10	1.41142e-08	Significantly downregulated (Adj-P<0.01)
ENSG00000176731.11_C8orf59	C8orf59	-0.430583	3.50692	-6.57029	4.56044e-10	1.41142e-08	Significantly downregulated (Adj-P<0.01)
ENSG00000129315.10_CCNT1	CCNT1	0.392799	4.31265	6.56563	4.67864e-10	1.44238e-08	Significantly downregulated (Adj-P<0.01)
ENSG00000112394.16_SLC16A10	SLC16A10	0.695425	5.13763	6.57204	4.51689e-10	1.404e-08	Significantly downregulated (Adj-P<0.01)
ENSG00000081760.16_AACS	AACS	-0.619874	2.45976	-6.54994	5.0986e-10	1.54486e-08	Significantly downregulated (Adj-P<0.01)
ENSG00000110442.11_COMMD9	COMMD9	-0.301232	4.44818	-6.57196	4.51878e-10	1.404e-08	Significantly downregulated (Adj-P<0.01)
ENSG00000256269.8_HMBS	HMBS	-0.483366	3.9447	-6.56816	4.61407e-10	1.42525e-08	Significantly downregulated (Adj-P<0.01)
ENSG00000143207.20_COP1	COP1	-0.28783	3.64899	-6.562	4.77268e-10	1.46568e-08	Significantly downregulated (Adj-P<0.01)
ENSG00000066084.12_DIP2B	DIP2B	0.495255	3.79789	6.55519	4.95405e-10	1.51552e-08	Significantly downregulated (Adj-P<0.01)
ENSG00000119403.14_PHF19	PHF19	-0.383081	3.14547	-6.55136	5.0593e-10	1.53889e-08	Significantly downregulated (Adj-P<0.01)
ENSG00000180818.4_HOXC10	HOXC10	-0.381339	5.37655	-6.56388	4.72367e-10	1.45344e-08	Significantly downregulated (Adj-P<0.01)
ENSG00000204619.7_PPP1R11	PPP1R11	-0.238288	4.24082	-6.55755	4.89046e-10	1.49895e-08	Significantly downregulated (Adj-P<0.01)
ENSG00000128872.9_TMOD2	TMOD2	0.558706	2.47165	6.52638	5.80017e-10	1.731e-08	Significantly downregulated (Adj-P<0.01)
ENSG00000119689.14_DLST	DLST	-0.368436	6.91156	-6.55135	5.05951e-10	1.53889e-08	Significantly downregulated (Adj-P<0.01)
ENSG00000170291.14_ELP5	ELP5	-0.48936	4.37739	-6.55417	4.98186e-10	1.5211e-08	Significantly downregulated (Adj-P<0.01)
ENSG00000120053.11_GOT1	GOT1	-0.659256	7.89064	-6.54484	5.24301e-10	1.57658e-08	Significantly downregulated (Adj-P<0.01)
ENSG00000203705.10_TATDN3	TATDN3	-0.398435	3.99152	-6.54626	5.20248e-10	1.56736e-08	Significantly downregulated (Adj-P<0.01)
ENSG00000165646.13_SLC18A2	SLC18A2	-2.82482	-1.84794	-6.59833	3.90937e-10	1.24138e-08	Significantly downregulated (Adj-P<0.01)
ENSG00000169957.9_ZNF768	ZNF768	-0.415606	5.80519	-6.54783	5.15804e-10	1.55989e-08	Significantly downregulated (Adj-P<0.01)
ENSG00000205707.10_ETFRF1	ETFRF1	-0.499891	4.65612	-6.5473	5.17308e-10	1.56146e-08	Significantly downregulated (Adj-P<0.01)
ENSG00000119421.6_NDUFA8	NDUFA8	-0.493483	6.17021	-6.54355	5.28015e-10	1.58474e-08	Significantly downregulated (Adj-P<0.01)
ENSG00000124762.13_CDKN1A	CDKN1A	2.39461	3.03525	6.50753	6.42903e-10	1.90436e-08	Significantly downregulated (Adj-P<0.01)
ENSG00000104177.17_MYEF2	MYEF2	1.30762	0.505559	6.55099	5.06933e-10	1.53893e-08	Significantly downregulated (Adj-P<0.01)
ENSG00000267257.1_AC105105.1	AC105105.1	2.99937	0.0398427	6.69096	2.34379e-10	7.96837e-09	Significantly downregulated (Adj-P<0.01)
ENSG00000164442.9_CITED2	CITED2	0.891616	5.22327	6.52779	5.75567e-10	1.72096e-08	Significantly downregulated (Adj-P<0.01)
ENSG00000177463.15_NR2C2	NR2C2	0.416809	5.09601	6.52479	5.8507e-10	1.74281e-08	Significantly downregulated (Adj-P<0.01)
ENSG00000198786.2_MT-ND5	MT-ND5	-0.85812	12.4668	-6.49521	6.87577e-10	2.01414e-08	Significantly downregulated (Adj-P<0.01)
ENSG00000186908.14_ZDHHC17	ZDHHC17	0.446586	4.55414	6.51798	6.07238e-10	1.80545e-08	Significantly downregulated (Adj-P<0.01)
ENSG00000153822.13_KCNJ16	KCNJ16	3.41198	-1.01287	6.99755	4.18625e-11	1.88822e-09	Significantly downregulated (Adj-P<0.01)
ENSG00000163660.11_CCNL1	CCNL1	0.405093	4.71035	6.51448	6.18963e-10	1.83687e-08	Significantly downregulated (Adj-P<0.01)
ENSG00000174197.16_MGA	MGA	0.534742	4.09332	6.50441	6.53924e-10	1.9334e-08	Significantly downregulated (Adj-P<0.01)
ENSG00000197182.14_MIRLET7BHG	MIRLET7BHG	-0.585494	2.32081	-6.49235	6.98364e-10	2.03448e-08	Significantly downregulated (Adj-P<0.01)
ENSG00000110955.8_ATP5F1B	ATP5F1B	-0.457915	10.2167	-6.4916	7.01225e-10	2.03908e-08	Significantly downregulated (Adj-P<0.01)
ENSG00000169994.18_MYO7B	MYO7B	-0.795215	1.82195	-6.48485	7.2748e-10	2.10004e-08	Significantly downregulated (Adj-P<0.01)
ENSG00000139209.15_SLC38A4	SLC38A4	1.226	4.11395	6.49285	6.96473e-10	2.0327e-08	Significantly downregulated (Adj-P<0.01)
ENSG00000139233.6_LLPH	LLPH	-0.260472	3.7949	-6.49663	6.82265e-10	2.00599e-08	Significantly downregulated (Adj-P<0.01)
ENSG00000111328.6_CDK2AP1	CDK2AP1	-0.435629	4.64449	-6.50404	6.55252e-10	1.93373e-08	Significantly downregulated (Adj-P<0.01)
ENSG00000080345.17_RIF1	RIF1	0.485166	5.61771	6.50331	6.57873e-10	1.93786e-08	Significantly downregulated (Adj-P<0.01)
ENSG00000186814.13_ZSCAN30	ZSCAN30	0.373699	4.32123	6.49373	6.93118e-10	2.02663e-08	Significantly downregulated (Adj-P<0.01)
ENSG00000170325.14_PRDM10	PRDM10	0.651584	3.75842	6.48337	7.33341e-10	2.11311e-08	Significantly downregulated (Adj-P<0.01)
ENSG00000163634.11_THOC7	THOC7	-0.293904	4.68821	-6.49535	6.87032e-10	2.01414e-08	Significantly downregulated (Adj-P<0.01)
ENSG00000085982.13_USP40	USP40	0.3363	4.77989	6.48654	7.20824e-10	2.08461e-08	Significantly downregulated (Adj-P<0.01)
ENSG00000218739.9_CEBPZOS	CEBPZOS	-0.367597	5.52505	-6.48288	7.35309e-10	2.11495e-08	Significantly downregulated (Adj-P<0.01)
ENSG00000144848.10_ATG3	ATG3	-0.272698	3.64431	-6.4728	7.76749e-10	2.21012e-08	Significantly downregulated (Adj-P<0.01)
ENSG00000158882.14_TOMM40L	TOMM40L	-0.566456	4.50879	-6.48088	7.43357e-10	2.13423e-08	Significantly downregulated (Adj-P<0.01)
ENSG00000172889.15_EGFL7	EGFL7	-0.621048	4.07156	-6.47903	7.50889e-10	2.14422e-08	Significantly downregulated (Adj-P<0.01)
ENSG00000113649.11_TCERG1	TCERG1	0.399251	5.33056	6.48047	7.45038e-10	2.13489e-08	Significantly downregulated (Adj-P<0.01)
ENSG00000172638.12_EFEMP2	EFEMP2	-0.611256	3.8606	-6.47454	7.69458e-10	2.1933e-08	Significantly downregulated (Adj-P<0.01)
ENSG00000147684.8_NDUFB9	NDUFB9	-0.490785	7.61912	-6.46974	7.89802e-10	2.23923e-08	Significantly downregulated (Adj-P<0.01)
ENSG00000120948.17_TARDBP	TARDBP	0.249373	6.61194	6.47199	7.80204e-10	2.21597e-08	Significantly downregulated (Adj-P<0.01)
ENSG00000080573.6_COL5A3	COL5A3	-0.611783	4.52679	-6.46235	8.22169e-10	2.3227e-08	Significantly downregulated (Adj-P<0.01)
ENSG00000170954.11_ZNF415	ZNF415	-1.05721	1.08792	-6.42436	1.01026e-09	2.82051e-08	Significantly downregulated (Adj-P<0.01)
ENSG00000159212.12_CLIC6	CLIC6	-1.40608	-0.0875966	-6.43727	9.42025e-10	2.64717e-08	Significantly downregulated (Adj-P<0.01)
ENSG00000181322.13_NME9	NME9	1.43565	0.253253	6.48016	7.46276e-10	2.13489e-08	Significantly downregulated (Adj-P<0.01)
ENSG00000118816.9_CCNI	CCNI	-0.353768	7.18037	-6.4472	8.92647e-10	2.51733e-08	Significantly downregulated (Adj-P<0.01)
ENSG00000112210.11_RAB23	RAB23	0.767148	2.49881	6.41527	1.0612e-09	2.93021e-08	Significantly downregulated (Adj-P<0.01)
ENSG00000131730.15_CKMT2	CKMT2	-0.747215	8.7944	-6.43084	9.75438e-10	2.73205e-08	Significantly downregulated (Adj-P<0.01)
ENSG00000138398.15_PPIG	PPIG	0.371743	5.43654	6.43984	9.29013e-10	2.61524e-08	Significantly downregulated (Adj-P<0.01)
ENSG00000107821.14_KAZALD1	KAZALD1	-0.997155	1.94168	-6.40377	1.12929e-09	3.09132e-08	Significantly downregulated (Adj-P<0.01)
ENSG00000182108.10_DEXI	DEXI	-0.365689	6.02926	-6.43079	9.75671e-10	2.73205e-08	Significantly downregulated (Adj-P<0.01)
ENSG00000285943.1_AC112128.1	AC112128.1	1.33338	0.0861577	6.46441	8.13004e-10	2.3009e-08	Significantly downregulated (Adj-P<0.01)
ENSG00000132463.13_GRSF1	GRSF1	-0.407783	7.56347	-6.42285	1.01858e-09	2.83564e-08	Significantly downregulated (Adj-P<0.01)
ENSG00000111271.14_ACAD10	ACAD10	-0.305196	3.99213	-6.42262	1.01981e-09	2.83564e-08	Significantly downregulated (Adj-P<0.01)
ENSG00000128626.11_MRPS12	MRPS12	-0.552864	3.77451	-6.42216	1.02238e-09	2.83783e-08	Significantly downregulated (Adj-P<0.01)
ENSG00000173153.13_ESRRA	ESRRA	-0.553314	7.22179	-6.4183	1.04397e-09	2.8927e-08	Significantly downregulated (Adj-P<0.01)
ENSG00000170634.12_ACYP2	ACYP2	-0.413019	5.74743	-6.42426	1.01082e-09	2.82051e-08	Significantly downregulated (Adj-P<0.01)
ENSG00000147883.10_CDKN2B	CDKN2B	1.12369	2.58906	6.3894	1.22039e-09	3.3065e-08	Significantly downregulated (Adj-P<0.01)
ENSG00000070366.13_SMG6	SMG6	0.30407	4.21248	6.4167	1.05303e-09	2.9127e-08	Significantly downregulated (Adj-P<0.01)
ENSG00000140740.10_UQCRC2	UQCRC2	-0.360311	8.61839	-6.40461	1.12415e-09	3.08257e-08	Significantly downregulated (Adj-P<0.01)
ENSG00000119844.15_AFTPH	AFTPH	0.341837	3.59195	6.3962	1.1764e-09	3.19882e-08	Significantly downregulated (Adj-P<0.01)
ENSG00000178814.16_OPLAH	OPLAH	-0.550422	5.54832	-6.41146	1.08329e-09	2.986e-08	Significantly downregulated (Adj-P<0.01)
ENSG00000110717.12_NDUFS8	NDUFS8	-0.461162	6.47682	-6.40799	1.10383e-09	3.03209e-08	Significantly downregulated (Adj-P<0.01)
ENSG00000124406.16_ATP8A1	ATP8A1	0.63747	6.49152	6.41054	1.08872e-09	2.99576e-08	Significantly downregulated (Adj-P<0.01)
ENSG00000116127.17_ALMS1	ALMS1	0.585881	1.70223	6.36797	1.3698e-09	3.64906e-08	Significantly downregulated (Adj-P<0.01)
ENSG00000169967.16_MAP3K2	MAP3K2	0.528542	4.90394	6.40014	1.15166e-09	3.14713e-08	Significantly downregulated (Adj-P<0.01)
ENSG00000154262.12_ABCA6	ABCA6	0.679735	2.75561	6.36955	1.35822e-09	3.63037e-08	Significantly downregulated (Adj-P<0.01)
ENSG00000239789.5_MRPS17	MRPS17	-0.301655	3.97806	-6.39616	1.17662e-09	3.19882e-08	Significantly downregulated (Adj-P<0.01)
ENSG00000157741.14_UBN2	UBN2	0.469171	4.83667	6.39811	1.16433e-09	3.17629e-08	Significantly downregulated (Adj-P<0.01)
ENSG00000170322.14_NFRKB	NFRKB	0.318131	4.28442	6.38618	1.24173e-09	3.34152e-08	Significantly downregulated (Adj-P<0.01)
ENSG00000159210.9_SNF8	SNF8	-0.412092	4.46614	-6.3881	1.22898e-09	3.31282e-08	Significantly downregulated (Adj-P<0.01)
ENSG00000269890.1_AL353593.1	AL353593.1	-0.881073	4.52789	-6.38851	1.22626e-09	3.3111e-08	Significantly downregulated (Adj-P<0.01)
ENSG00000133624.13_ZNF767P	ZNF767P	0.350675	3.20988	6.36969	1.35714e-09	3.63037e-08	Significantly downregulated (Adj-P<0.01)
ENSG00000198265.11_HELZ	HELZ	0.498709	5.21827	6.37701	1.30468e-09	3.49906e-08	Significantly downregulated (Adj-P<0.01)
ENSG00000270112.3_AC090241.2	AC090241.2	-1.0438	-0.626961	-6.36915	1.36113e-09	3.63203e-08	Significantly downregulated (Adj-P<0.01)
ENSG00000159640.15_ACE	ACE	-0.727113	3.82432	-6.36278	1.40858e-09	3.73981e-08	Significantly downregulated (Adj-P<0.01)
ENSG00000163625.15_WDFY3	WDFY3	0.506394	4.42727	6.36075	1.42406e-09	3.76829e-08	Significantly downregulated (Adj-P<0.01)
ENSG00000173230.15_GOLGB1	GOLGB1	0.392055	5.12271	6.36489	1.39271e-09	3.70387e-08	Significantly downregulated (Adj-P<0.01)
ENSG00000147166.10_ITGB1BP2	ITGB1BP2	-0.54993	4.08822	-6.36173	1.41661e-09	3.75486e-08	Significantly downregulated (Adj-P<0.01)
ENSG00000148459.15_PDSS1	PDSS1	-0.557853	1.66031	-6.32532	1.72263e-09	4.44719e-08	Significantly downregulated (Adj-P<0.01)
ENSG00000084710.13_EFR3B	EFR3B	-0.826788	3.50898	-6.35043	1.50535e-09	3.95049e-08	Significantly downregulated (Adj-P<0.01)
ENSG00000198315.10_ZKSCAN8	ZKSCAN8	0.542897	4.14412	6.34823	1.5233e-09	3.99099e-08	Significantly downregulated (Adj-P<0.01)
ENSG00000156502.13_SUPV3L1	SUPV3L1	-0.30806	4.56515	-6.35619	1.45947e-09	3.84916e-08	Significantly downregulated (Adj-P<0.01)
ENSG00000270231.3_NBPF8	NBPF8	0.579474	2.43373	6.32014	1.77112e-09	4.55017e-08	Significantly downregulated (Adj-P<0.01)
ENSG00000127831.10_VIL1	VIL1	-3.13878	-2.17006	-6.38434	1.25417e-09	3.36928e-08	Significantly downregulated (Adj-P<0.01)
ENSG00000136463.7_TACO1	TACO1	-0.39579	4.80677	-6.35474	1.47084e-09	3.87273e-08	Significantly downregulated (Adj-P<0.01)
ENSG00000132464.11_ENAM	ENAM	0.831759	2.67827	6.31844	1.78735e-09	4.58444e-08	Significantly downregulated (Adj-P<0.01)
ENSG00000153914.15_SREK1	SREK1	0.383302	5.41603	6.35298	1.48483e-09	3.9031e-08	Significantly downregulated (Adj-P<0.01)
ENSG00000103415.11_HMOX2	HMOX2	-0.436288	3.20632	-6.33838	1.60605e-09	4.18021e-08	Significantly downregulated (Adj-P<0.01)
ENSG00000198743.6_SLC5A3	SLC5A3	0.952128	1.95569	6.31012	1.8688e-09	4.77024e-08	Significantly downregulated (Adj-P<0.01)
ENSG00000158864.12_NDUFS2	NDUFS2	-0.425648	7.73126	-6.33971	1.59462e-09	4.16411e-08	Significantly downregulated (Adj-P<0.01)
ENSG00000132963.7_POMP	POMP	-0.297489	5.79008	-6.34569	1.5442e-09	4.03908e-08	Significantly downregulated (Adj-P<0.01)
ENSG00000181227.3_DLSTP1	DLSTP1	1.10457	-0.423164	6.39285	1.19783e-09	3.25093e-08	Significantly downregulated (Adj-P<0.01)
ENSG00000114439.18_BBX	BBX	0.520941	4.08296	6.32749	1.70273e-09	4.41014e-08	Significantly downregulated (Adj-P<0.01)
ENSG00000244306.11_DUXAP10	DUXAP10	1.64289	0.602638	6.35796	1.44566e-09	3.81909e-08	Significantly downregulated (Adj-P<0.01)
ENSG00000213463.4_SYNJ2BP	SYNJ2BP	-0.371714	6.39758	-6.33887	1.60185e-09	4.17613e-08	Significantly downregulated (Adj-P<0.01)
ENSG00000078674.17_PCM1	PCM1	0.419301	7.62444	6.3338	1.64598e-09	4.27713e-08	Significantly downregulated (Adj-P<0.01)
ENSG00000108384.14_RAD51C	RAD51C	-0.358353	2.60967	-6.31274	1.8428e-09	4.71146e-08	Significantly downregulated (Adj-P<0.01)
ENSG00000167920.8_TMEM99	TMEM99	-0.454575	1.99621	-6.3026	1.94556e-09	4.92657e-08	Significantly downregulated (Adj-P<0.01)
ENSG00000168288.12_MMADHC	MMADHC	-0.330978	6.25406	-6.32931	1.68617e-09	4.37439e-08	Significantly downregulated (Adj-P<0.01)
ENSG00000020426.10_MNAT1	MNAT1	-0.341099	4.54664	-6.32627	1.7139e-09	4.43186e-08	Significantly downregulated (Adj-P<0.01)
ENSG00000108439.10_PNPO	PNPO	-0.276732	4.53668	-6.32104	1.76264e-09	4.53574e-08	Significantly downregulated (Adj-P<0.01)
ENSG00000140575.12_IQGAP1	IQGAP1	0.547295	4.81574	6.31439	1.82659e-09	4.67755e-08	Significantly downregulated (Adj-P<0.01)
ENSG00000198695.2_MT-ND6	MT-ND6	-0.720175	10.798	-6.29135	2.06618e-09	5.1865e-08	Significantly downregulated (Adj-P<0.01)
ENSG00000108861.8_DUSP3	DUSP3	-0.489987	8.01529	-6.30514	1.91931e-09	4.88348e-08	Significantly downregulated (Adj-P<0.01)
ENSG00000175575.12_PAAF1	PAAF1	0.33018	3.67232	6.30071	1.96532e-09	4.9687e-08	Significantly downregulated (Adj-P<0.01)
ENSG00000131503.20_ANKHD1	ANKHD1	0.335097	5.84541	6.309	1.88006e-09	4.79129e-08	Significantly downregulated (Adj-P<0.01)
ENSG00000243429.1_OR7E29P	OR7E29P	-1.77103	-0.191965	-6.2755	2.24868e-09	5.58722e-08	Significantly downregulated (Adj-P<0.01)
ENSG00000100577.18_GSTZ1	GSTZ1	-0.387853	3.94841	-6.30308	1.94056e-09	4.92177e-08	Significantly downregulated (Adj-P<0.01)
ENSG00000240764.3_PCDHGC5	PCDHGC5	1.40573	0.42481	6.30435	1.92743e-09	4.8963e-08	Significantly downregulated (Adj-P<0.01)
ENSG00000110888.17_CAPRIN2	CAPRIN2	0.513573	3.31918	6.27928	2.20378e-09	5.50653e-08	Significantly downregulated (Adj-P<0.01)
ENSG00000061987.15_MON2	MON2	0.387415	4.17706	6.29121	2.06781e-09	5.1865e-08	Significantly downregulated (Adj-P<0.01)
ENSG00000173209.23_AHSA2P	AHSA2P	0.29751	5.51787	6.29998	1.973e-09	4.98017e-08	Significantly downregulated (Adj-P<0.01)
ENSG00000104131.12_EIF3J	EIF3J	-0.338966	6.7202	-6.29596	2.0159e-09	5.08039e-08	Significantly downregulated (Adj-P<0.01)
ENSG00000139722.6_VPS37B	VPS37B	-0.43576	2.54227	-6.27371	2.27037e-09	5.61476e-08	Significantly downregulated (Adj-P<0.01)
ENSG00000175455.14_CCDC14	CCDC14	0.492841	3.31049	6.27457	2.25995e-09	5.59771e-08	Significantly downregulated (Adj-P<0.01)
ENSG00000241644.2_INMT	INMT	-0.563904	2.88951	-6.27511	2.25341e-09	5.59022e-08	Significantly downregulated (Adj-P<0.01)
ENSG00000125741.4_OPA3	OPA3	-0.359878	4.33617	-6.29243	2.05437e-09	5.16912e-08	Significantly downregulated (Adj-P<0.01)
ENSG00000167555.13_ZNF528	ZNF528	0.518786	2.53807	6.25828	2.46496e-09	5.98411e-08	Significantly downregulated (Adj-P<0.01)
ENSG00000162924.14_REL	REL	0.787635	2.04583	6.24956	2.58221e-09	6.20238e-08	Significantly downregulated (Adj-P<0.01)
ENSG00000258676.4_AC091544.2	AC091544.2	2.27563	-1.26343	6.57879	4.35262e-10	1.36202e-08	Significantly downregulated (Adj-P<0.01)
ENSG00000254772.9_EEF1G	EEF1G	-0.312341	10.4724	-6.26404	2.39048e-09	5.83902e-08	Significantly downregulated (Adj-P<0.01)
ENSG00000131143.8_COX4I1	COX4I1	-0.498036	8.21007	-6.27574	2.24586e-09	5.58722e-08	Significantly downregulated (Adj-P<0.01)
ENSG00000107164.15_FUBP3	FUBP3	0.278922	4.1221	6.27911	2.2058e-09	5.50653e-08	Significantly downregulated (Adj-P<0.01)
ENSG00000172954.13_LCLAT1	LCLAT1	-0.56038	2.00579	-6.25157	2.55461e-09	6.14538e-08	Significantly downregulated (Adj-P<0.01)
ENSG00000150787.7_PTS	PTS	-0.363352	3.70275	-6.27843	2.21386e-09	5.51797e-08	Significantly downregulated (Adj-P<0.01)
ENSG00000176386.8_CDC26	CDC26	-0.430839	3.03636	-6.2669	2.35435e-09	5.78638e-08	Significantly downregulated (Adj-P<0.01)
ENSG00000014641.17_MDH1	MDH1	-0.553437	8.20549	-6.27219	2.28882e-09	5.65157e-08	Significantly downregulated (Adj-P<0.01)
ENSG00000175348.10_TMEM9B	TMEM9B	-0.270782	4.4964	-6.28161	2.17662e-09	5.45083e-08	Significantly downregulated (Adj-P<0.01)
ENSG00000075240.16_GRAMD4	GRAMD4	0.45099	3.78373	6.26883	2.33014e-09	5.73575e-08	Significantly downregulated (Adj-P<0.01)
ENSG00000147256.11_ARHGAP36	ARHGAP36	2.64246	1.68961	6.26483	2.38049e-09	5.82681e-08	Significantly downregulated (Adj-P<0.01)
ENSG00000188343.12_FAM92A	FAM92A	-0.473909	2.69601	-6.24615	2.6295e-09	6.29665e-08	Significantly downregulated (Adj-P<0.01)
ENSG00000038219.12_BOD1L1	BOD1L1	0.494056	5.00307	6.26347	2.39771e-09	5.8477e-08	Significantly downregulated (Adj-P<0.01)
ENSG00000197323.11_TRIM33	TRIM33	0.433226	4.47446	6.25798	2.46892e-09	5.98458e-08	Significantly downregulated (Adj-P<0.01)
ENSG00000196072.11_BLOC1S2	BLOC1S2	-0.433844	3.76589	-6.25763	2.47349e-09	5.98653e-08	Significantly downregulated (Adj-P<0.01)
ENSG00000166313.18_APBB1	APBB1	-0.327572	5.00212	-6.26577	2.36847e-09	5.81209e-08	Significantly downregulated (Adj-P<0.01)
ENSG00000180354.15_MTURN	MTURN	0.490758	6.18074	6.26472	2.38181e-09	5.82681e-08	Significantly downregulated (Adj-P<0.01)
ENSG00000166228.8_PCBD1	PCBD1	-0.406026	4.50811	-6.2631	2.40254e-09	5.85047e-08	Significantly downregulated (Adj-P<0.01)
ENSG00000185414.19_MRPL30	MRPL30	-0.262759	5.17262	-6.2594	2.45027e-09	5.95756e-08	Significantly downregulated (Adj-P<0.01)
ENSG00000105426.16_PTPRS	PTPRS	0.511326	4.63613	6.25604	2.49457e-09	6.0192e-08	Significantly downregulated (Adj-P<0.01)
ENSG00000198168.8_SVIP	SVIP	0.498527	3.24647	6.23398	2.80529e-09	6.66761e-08	Significantly downregulated (Adj-P<0.01)
ENSG00000177731.15_FLII	FLII	-0.343643	8.26974	-6.24515	2.6435e-09	6.30192e-08	Significantly downregulated (Adj-P<0.01)
ENSG00000204186.8_ZDBF2	ZDBF2	0.68417	4.24477	6.2447	2.64975e-09	6.30737e-08	Significantly downregulated (Adj-P<0.01)
ENSG00000086232.12_EIF2AK1	EIF2AK1	-0.290539	5.22608	-6.25621	2.49238e-09	6.0192e-08	Significantly downregulated (Adj-P<0.01)
ENSG00000145147.19_SLIT2	SLIT2	0.92903	2.71555	6.2149	3.10438e-09	7.31278e-08	Significantly downregulated (Adj-P<0.01)
ENSG00000279192.1_PWAR5	PWAR5	1.2583	1.85304	6.21138	3.16284e-09	7.42536e-08	Significantly downregulated (Adj-P<0.01)
ENSG00000196388.8_INCA1	INCA1	-0.531032	1.17438	-6.21118	3.1662e-09	7.42536e-08	Significantly downregulated (Adj-P<0.01)
ENSG00000183336.8_BOLA2	BOLA2	-0.542191	1.57273	-6.21559	3.09302e-09	7.29685e-08	Significantly downregulated (Adj-P<0.01)
ENSG00000188647.12_PTAR1	PTAR1	0.533216	4.77818	6.24587	2.63335e-09	6.29665e-08	Significantly downregulated (Adj-P<0.01)
ENSG00000164318.17_EGFLAM	EGFLAM	-0.380286	5.16756	-6.24671	2.62157e-09	6.28741e-08	Significantly downregulated (Adj-P<0.01)
ENSG00000149532.15_CPSF7	CPSF7	0.343705	5.92836	6.24536	2.64049e-09	6.30192e-08	Significantly downregulated (Adj-P<0.01)
ENSG00000105472.12_CLEC11A	CLEC11A	-0.90341	0.253072	-6.19817	3.39225e-09	7.8283e-08	Significantly downregulated (Adj-P<0.01)
ENSG00000177853.14_ZNF518A	ZNF518A	0.529486	3.34621	6.21238	3.14614e-09	7.40019e-08	Significantly downregulated (Adj-P<0.01)
ENSG00000088320.3_REM1	REM1	-0.850979	-0.25918	-6.20663	3.2435e-09	7.56196e-08	Significantly downregulated (Adj-P<0.01)
ENSG00000274080.1_AC005089.1	AC005089.1	-1.1084	0.0129023	-6.19607	3.43005e-09	7.90405e-08	Significantly downregulated (Adj-P<0.01)
ENSG00000113845.9_TIMMDC1	TIMMDC1	-0.316312	6.03651	-6.22994	2.86618e-09	6.80214e-08	Significantly downregulated (Adj-P<0.01)
ENSG00000070759.16_TESK2	TESK2	0.553554	2.93662	6.20131	3.3362e-09	7.73177e-08	Significantly downregulated (Adj-P<0.01)
ENSG00000147654.14_EBAG9	EBAG9	-0.339064	4.01149	-6.2192	3.03439e-09	7.17987e-08	Significantly downregulated (Adj-P<0.01)
ENSG00000112695.11_COX7A2	COX7A2	-0.598406	5.40617	-6.22279	2.97698e-09	7.05455e-08	Significantly downregulated (Adj-P<0.01)
ENSG00000148158.16_SNX30	SNX30	0.610955	2.18636	6.18288	3.67808e-09	8.43885e-08	Significantly downregulated (Adj-P<0.01)
ENSG00000185915.5_KLHL34	KLHL34	-1.08211	5.10279	-6.21831	3.04861e-09	7.20279e-08	Significantly downregulated (Adj-P<0.01)
ENSG00000242114.5_MTFP1	MTFP1	-0.971016	2.03377	-6.1892	3.55715e-09	8.17321e-08	Significantly downregulated (Adj-P<0.01)
ENSG00000226314.8_ZNF192P1	ZNF192P1	0.954312	0.227787	6.20148	3.33329e-09	7.73177e-08	Significantly downregulated (Adj-P<0.01)
ENSG00000151914.19_DST	DST	0.46519	8.34105	6.20265	3.31267e-09	7.70062e-08	Significantly downregulated (Adj-P<0.01)
ENSG00000134905.16_CARS2	CARS2	-0.325069	5.4084	-6.20939	3.19632e-09	7.48494e-08	Significantly downregulated (Adj-P<0.01)
ENSG00000138085.16_ATRAID	ATRAID	-0.302459	5.37098	-6.20909	3.20151e-09	7.48607e-08	Significantly downregulated (Adj-P<0.01)
ENSG00000278249.1_SCARNA2	SCARNA2	-1.0507	0.443283	-6.17195	3.89668e-09	8.83823e-08	Significantly downregulated (Adj-P<0.01)
ENSG00000161558.10_TMEM143	TMEM143	-0.369919	5.9797	-6.20559	3.26144e-09	7.59266e-08	Significantly downregulated (Adj-P<0.01)
ENSG00000224051.6_CPTP	CPTP	-0.604891	5.30334	-6.20106	3.34068e-09	7.73177e-08	Significantly downregulated (Adj-P<0.01)
ENSG00000140470.13_ADAMTS17	ADAMTS17	0.9167	1.14079	6.15538	4.25297e-09	9.58025e-08	Significantly downregulated (Adj-P<0.01)
ENSG00000165813.19_CCDC186	CCDC186	0.51166	4.20407	6.18138	3.7073e-09	8.49363e-08	Significantly downregulated (Adj-P<0.01)
ENSG00000188243.12_COMMD6	COMMD6	-0.38912	3.16747	-6.17512	3.83202e-09	8.72897e-08	Significantly downregulated (Adj-P<0.01)
ENSG00000070269.13_TMEM260	TMEM260	0.43379	2.04021	6.14556	4.47869e-09	1.00294e-07	Significantly downregulated (Adj-P<0.01)
ENSG00000144815.15_NXPE3	NXPE3	-0.449389	6.97862	-6.17868	3.76059e-09	8.6033e-08	Significantly downregulated (Adj-P<0.01)
ENSG00000114354.13_TFG	TFG	-0.297273	4.83508	-6.17817	3.77072e-09	8.61407e-08	Significantly downregulated (Adj-P<0.01)
ENSG00000153130.17_SCOC	SCOC	-0.369665	4.71202	-6.17586	3.81711e-09	8.70752e-08	Significantly downregulated (Adj-P<0.01)
ENSG00000155463.12_OXA1L	OXA1L	-0.29602	6.76549	-6.17218	3.89213e-09	8.83823e-08	Significantly downregulated (Adj-P<0.01)
ENSG00000164040.16_PGRMC2	PGRMC2	-0.428436	4.93589	-6.17403	3.8543e-09	8.76715e-08	Significantly downregulated (Adj-P<0.01)
ENSG00000242616.3_GNG10	GNG10	-0.51027	3.35679	-6.15972	4.15657e-09	9.40084e-08	Significantly downregulated (Adj-P<0.01)
ENSG00000281383.1_FP671120.4	FP671120.4	-1.28275	-1.8321	-6.13204	4.80916e-09	1.0679e-07	Significantly downregulated (Adj-P<0.01)
ENSG00000114378.16_HYAL1	HYAL1	-0.782227	3.07609	-6.15257	4.31637e-09	9.70694e-08	Significantly downregulated (Adj-P<0.01)
ENSG00000183808.11_RBM12B	RBM12B	0.513282	2.89834	6.13772	4.66756e-09	1.04083e-07	Significantly downregulated (Adj-P<0.01)
ENSG00000118482.11_PHF3	PHF3	0.444064	5.39078	6.15793	4.196e-09	9.47652e-08	Significantly downregulated (Adj-P<0.01)
ENSG00000133983.14_COX16	COX16	-0.31443	4.64669	-6.15533	4.254e-09	9.58025e-08	Significantly downregulated (Adj-P<0.01)
ENSG00000171385.9_KCND3	KCND3	0.970276	2.90607	6.12178	5.0756e-09	1.11614e-07	Significantly downregulated (Adj-P<0.01)
ENSG00000124942.13_AHNAK	AHNAK	0.490678	9.9839	6.13594	4.71138e-09	1.04912e-07	Significantly downregulated (Adj-P<0.01)
ENSG00000173436.14_MINOS1	MINOS1	-0.50301	5.75169	-6.15142	4.34266e-09	9.75224e-08	Significantly downregulated (Adj-P<0.01)
ENSG00000254154.8_CRYZL2P-SEC16B	CRYZL2P-SEC16B	0.764636	3.17693	6.12527	4.98334e-09	1.10065e-07	Significantly downregulated (Adj-P<0.01)
ENSG00000108506.12_INTS2	INTS2	0.483731	2.85354	6.11729	5.19682e-09	1.13964e-07	Significantly downregulated (Adj-P<0.01)
ENSG00000198130.15_HIBCH	HIBCH	-0.499798	4.76652	-6.14761	4.43058e-09	9.93564e-08	Significantly downregulated (Adj-P<0.01)
ENSG00000284931.1_AC104389.5	AC104389.5	-3.20845	-2.91987	-6.32153	1.75802e-09	4.53118e-08	Significantly downregulated (Adj-P<0.01)
ENSG00000262855.1_AC012146.4	AC012146.4	1.54864	-0.247653	6.16212	4.10436e-09	9.296e-08	Significantly downregulated (Adj-P<0.01)
ENSG00000154723.12_ATP5PF	ATP5PF	-0.565645	7.11034	-6.13968	4.61969e-09	1.03305e-07	Significantly downregulated (Adj-P<0.01)
ENSG00000100281.13_HMGXB4	HMGXB4	0.429676	3.07537	6.11558	5.24377e-09	1.14677e-07	Significantly downregulated (Adj-P<0.01)
ENSG00000260257.2_AL035071.1	AL035071.1	-0.744709	0.544155	-6.1016	5.64296e-09	1.21896e-07	Significantly downregulated (Adj-P<0.01)
ENSG00000110435.11_PDHX	PDHX	-0.424374	6.42577	-6.13807	4.65886e-09	1.04035e-07	Significantly downregulated (Adj-P<0.01)
ENSG00000186298.11_PPP1CC	PPP1CC	-0.33343	6.88066	-6.13329	4.77755e-09	1.06237e-07	Significantly downregulated (Adj-P<0.01)
ENSG00000235205.1_TATDN2P3	TATDN2P3	1.41079	0.290515	6.19936	3.37093e-09	7.79043e-08	Significantly downregulated (Adj-P<0.01)
ENSG00000109079.9_TNFAIP1	TNFAIP1	-0.224644	4.13652	-6.13087	4.8389e-09	1.07301e-07	Significantly downregulated (Adj-P<0.01)
ENSG00000240849.10_TMEM189	TMEM189	-0.345972	3.10629	-6.11635	5.22249e-09	1.14369e-07	Significantly downregulated (Adj-P<0.01)
ENSG00000132423.11_COQ3	COQ3	-0.477217	3.79046	-6.12486	4.99423e-09	1.10065e-07	Significantly downregulated (Adj-P<0.01)
ENSG00000155008.13_APOOL	APOOL	-0.390631	5.28295	-6.1286	4.89698e-09	1.08437e-07	Significantly downregulated (Adj-P<0.01)
ENSG00000172493.20_AFF1	AFF1	0.425566	6.83603	6.12508	4.98851e-09	1.10065e-07	Significantly downregulated (Adj-P<0.01)
ENSG00000070018.8_LRP6	LRP6	0.519451	4.9838	6.12471	4.99822e-09	1.10065e-07	Significantly downregulated (Adj-P<0.01)
ENSG00000226328.6_NUP50-DT	NUP50-DT	-0.552999	1.58362	-6.08661	6.10408e-09	1.30613e-07	Significantly downregulated (Adj-P<0.01)
ENSG00000113971.19_NPHP3	NPHP3	0.408213	3.82492	6.10717	5.48041e-09	1.19032e-07	Significantly downregulated (Adj-P<0.01)
ENSG00000036672.15_USP2	USP2	-0.353255	6.39065	-6.11773	5.18476e-09	1.13857e-07	Significantly downregulated (Adj-P<0.01)
ENSG00000168807.16_SNTB2	SNTB2	0.555469	4.04278	6.10627	5.50641e-09	1.19433e-07	Significantly downregulated (Adj-P<0.01)
ENSG00000198844.11_ARHGEF15	ARHGEF15	-0.55817	3.41871	-6.1074	5.47372e-09	1.19032e-07	Significantly downregulated (Adj-P<0.01)
ENSG00000177302.14_TOP3A	TOP3A	-0.314097	3.11423	-6.09728	5.77215e-09	1.24348e-07	Significantly downregulated (Adj-P<0.01)
ENSG00000168143.8_FAM83B	FAM83B	2.19035	-0.209002	6.26946	2.32238e-09	5.72554e-08	Significantly downregulated (Adj-P<0.01)
ENSG00000149564.11_ESAM	ESAM	-0.509797	3.93702	-6.10883	5.4329e-09	1.18324e-07	Significantly downregulated (Adj-P<0.01)
ENSG00000156253.6_RWDD2B	RWDD2B	-0.328911	4.87663	-6.1138	5.29286e-09	1.15591e-07	Significantly downregulated (Adj-P<0.01)
ENSG00000009724.16_MASP2	MASP2	0.549415	1.80391	6.0694	6.6789e-09	1.41549e-07	Significantly downregulated (Adj-P<0.01)
ENSG00000134440.11_NARS	NARS	-0.354055	6.40995	-6.1096	5.41087e-09	1.18006e-07	Significantly downregulated (Adj-P<0.01)
ENSG00000125895.5_TMEM74B	TMEM74B	-0.64857	0.478575	-6.06342	6.89099e-09	1.4472e-07	Significantly downregulated (Adj-P<0.01)
ENSG00000173889.15_PHC3	PHC3	0.510935	4.94538	6.1036	5.58415e-09	1.2079e-07	Significantly downregulated (Adj-P<0.01)
ENSG00000147421.17_HMBOX1	HMBOX1	0.598241	2.3995	6.06687	6.76807e-09	1.42705e-07	Significantly downregulated (Adj-P<0.01)
ENSG00000123444.13_KBTBD4	KBTBD4	0.290289	4.04428	6.09604	5.80986e-09	1.24991e-07	Significantly downregulated (Adj-P<0.01)
ENSG00000012061.15_ERCC1	ERCC1	-0.311231	4.79844	-6.10446	5.55896e-09	1.20409e-07	Significantly downregulated (Adj-P<0.01)
ENSG00000173517.10_PEAK1	PEAK1	0.463772	4.79232	6.09963	5.70141e-09	1.22991e-07	Significantly downregulated (Adj-P<0.01)
ENSG00000154133.14_ROBO4	ROBO4	-0.560989	4.03975	-6.0916	5.9465e-09	1.27585e-07	Significantly downregulated (Adj-P<0.01)
ENSG00000185651.14_UBE2L3	UBE2L3	-0.200047	5.54398	-6.0945	5.85695e-09	1.25833e-07	Significantly downregulated (Adj-P<0.01)
ENSG00000232593.7_KANTR	KANTR	0.476499	3.75022	6.07759	6.39892e-09	1.36187e-07	Significantly downregulated (Adj-P<0.01)
ENSG00000123545.5_NDUFAF4	NDUFAF4	-0.390062	4.55939	-6.09011	5.99326e-09	1.28414e-07	Significantly downregulated (Adj-P<0.01)
ENSG00000155744.9_FAM126B	FAM126B	0.481712	3.77298	6.06919	6.68652e-09	1.41549e-07	Significantly downregulated (Adj-P<0.01)
ENSG00000092201.9_SUPT16H	SUPT16H	0.246534	4.86104	6.08576	6.13119e-09	1.31016e-07	Significantly downregulated (Adj-P<0.01)
ENSG00000149084.12_HSD17B12	HSD17B12	-0.547984	4.12033	-6.07962	6.33151e-09	1.35115e-07	Significantly downregulated (Adj-P<0.01)
ENSG00000146963.17_LUC7L2	LUC7L2	0.249818	6.29707	6.07796	6.38675e-09	1.36111e-07	Significantly downregulated (Adj-P<0.01)
ENSG00000160111.12_CPAMD8	CPAMD8	-0.761096	2.36356	-6.05105	7.3508e-09	1.53161e-07	Significantly downregulated (Adj-P<0.01)
ENSG00000127527.13_EPS15L1	EPS15L1	-0.416923	5.29517	-6.07563	6.46511e-09	1.37412e-07	Significantly downregulated (Adj-P<0.01)
ENSG00000127241.16_MASP1	MASP1	-1.0234	3.27002	-6.0645	6.85225e-09	1.44097e-07	Significantly downregulated (Adj-P<0.01)
ENSG00000179832.17_MROH1	MROH1	-0.340777	3.71789	-6.06639	6.78498e-09	1.42872e-07	Significantly downregulated (Adj-P<0.01)
ENSG00000126070.19_AGO3	AGO3	0.366744	3.98132	6.0594	7.03715e-09	1.47399e-07	Significantly downregulated (Adj-P<0.01)
ENSG00000180182.10_MED14	MED14	0.452186	6.34872	6.06989	6.66213e-09	1.4141e-07	Significantly downregulated (Adj-P<0.01)
ENSG00000167136.6_ENDOG	ENDOG	-0.659935	6.06201	-6.06778	6.73588e-09	1.42215e-07	Significantly downregulated (Adj-P<0.01)
ENSG00000248019.2_FAM13A-AS1	FAM13A-AS1	0.599819	2.19547	6.03058	8.17793e-09	1.68406e-07	Significantly downregulated (Adj-P<0.01)
ENSG00000124222.22_STX16	STX16	0.279811	5.98607	6.06816	6.72244e-09	1.4212e-07	Significantly downregulated (Adj-P<0.01)
ENSG00000146005.3_PSD2	PSD2	2.727	-1.33539	6.38859	1.22571e-09	3.3111e-08	Significantly downregulated (Adj-P<0.01)
ENSG00000169062.14_UPF3A	UPF3A	0.274577	5.16544	6.06139	6.96462e-09	1.46073e-07	Significantly downregulated (Adj-P<0.01)
ENSG00000139645.9_ANKRD52	ANKRD52	-0.378952	5.99656	-6.05814	7.08371e-09	1.48179e-07	Significantly downregulated (Adj-P<0.01)
ENSG00000112304.10_ACOT13	ACOT13	-0.283639	4.36094	-6.0577	7.10009e-09	1.48327e-07	Significantly downregulated (Adj-P<0.01)
ENSG00000277258.4_PCGF2	PCGF2	-0.514859	1.65417	-6.01571	8.83555e-09	1.80311e-07	Significantly downregulated (Adj-P<0.01)
ENSG00000138735.15_PDE5A	PDE5A	0.765139	4.14323	6.04038	7.77103e-09	1.60861e-07	Significantly downregulated (Adj-P<0.01)
ENSG00000139684.13_ESD	ESD	-0.22838	5.31337	-6.05491	7.20431e-09	1.50306e-07	Significantly downregulated (Adj-P<0.01)
ENSG00000161551.14_ZNF577	ZNF577	0.519097	2.94361	6.02339	8.49003e-09	1.73706e-07	Significantly downregulated (Adj-P<0.01)
ENSG00000188039.14_NWD1	NWD1	2.44651	-1.88087	6.53801	5.44286e-10	1.6305e-08	Significantly downregulated (Adj-P<0.01)
ENSG00000183423.11_LRIT3	LRIT3	1.42221	-1.33318	6.19466	3.4558e-09	7.95185e-08	Significantly downregulated (Adj-P<0.01)
ENSG00000160961.11_ZNF333	ZNF333	0.332969	3.58953	6.03498	7.99295e-09	1.64912e-07	Significantly downregulated (Adj-P<0.01)
ENSG00000156469.8_MTERF3	MTERF3	-0.360842	3.29225	-6.03486	7.99786e-09	1.64912e-07	Significantly downregulated (Adj-P<0.01)
ENSG00000164976.8_MYORG	MYORG	-0.633436	6.80249	-6.04527	7.57574e-09	1.57435e-07	Significantly downregulated (Adj-P<0.01)
ENSG00000128609.14_NDUFA5	NDUFA5	-0.359284	7.2717	-6.04211	7.70149e-09	1.5963e-07	Significantly downregulated (Adj-P<0.01)
ENSG00000255423.1_EBLN2	EBLN2	1.25776	-0.986794	6.20664	3.24342e-09	7.56196e-08	Significantly downregulated (Adj-P<0.01)
ENSG00000114999.7_TTL	TTL	-0.543913	5.5889	-6.04273	7.67654e-09	1.59321e-07	Significantly downregulated (Adj-P<0.01)
ENSG00000143546.9_S100A8	S100A8	-2.37127	-1.21399	-6.04721	7.49947e-09	1.56054e-07	Significantly downregulated (Adj-P<0.01)
ENSG00000159713.10_TPPP3	TPPP3	1.42721	4.23329	6.02605	8.3732e-09	1.71537e-07	Significantly downregulated (Adj-P<0.01)
ENSG00000088832.16_FKBP1A	FKBP1A	-0.276036	5.35561	-6.03549	7.97163e-09	1.64799e-07	Significantly downregulated (Adj-P<0.01)
ENSG00000151366.12_NDUFC2	NDUFC2	-0.312179	6.60214	-6.02774	8.3001e-09	1.7048e-07	Significantly downregulated (Adj-P<0.01)
ENSG00000165264.10_NDUFB6	NDUFB6	-0.357341	5.30109	-6.02831	8.27533e-09	1.70191e-07	Significantly downregulated (Adj-P<0.01)
ENSG00000267815.1_AC008655.1	AC008655.1	-2.19084	-2.60693	-5.9987	9.65187e-09	1.95872e-07	Significantly downregulated (Adj-P<0.01)
ENSG00000148481.13_MINDY3	MINDY3	-0.4628	2.58554	-5.99485	9.84648e-09	1.9915e-07	Significantly downregulated (Adj-P<0.01)
ENSG00000189157.13_FAM47E	FAM47E	0.714208	1.67691	5.97339	1.10043e-08	2.18941e-07	Significantly downregulated (Adj-P<0.01)
ENSG00000156671.13_SAMD8	SAMD8	0.492025	5.19016	6.0185	8.70857e-09	1.77948e-07	Significantly downregulated (Adj-P<0.01)
ENSG00000210082.2_MT-RNR2	MT-RNR2	-0.692019	13.7704	-5.97727	1.07853e-08	2.15394e-07	Significantly downregulated (Adj-P<0.01)
ENSG00000112773.15_TENT5A	TENT5A	0.643702	1.97639	5.96881	1.12676e-08	2.23063e-07	Significantly downregulated (Adj-P<0.01)
ENSG00000100412.15_ACO2	ACO2	-0.404124	8.88437	-5.99854	9.65974e-09	1.95872e-07	Significantly downregulated (Adj-P<0.01)
ENSG00000107581.12_EIF3A	EIF3A	0.297481	7.80925	6.00778	9.2076e-09	1.87663e-07	Significantly downregulated (Adj-P<0.01)
ENSG00000279159.1_AC003681.1	AC003681.1	0.639583	3.3544	5.98654	1.02796e-08	2.06857e-07	Significantly downregulated (Adj-P<0.01)
ENSG00000227877.6_MRLN	MRLN	-0.62752	3.92365	-6.0041	9.38496e-09	1.90788e-07	Significantly downregulated (Adj-P<0.01)
ENSG00000145864.12_GABRB2	GABRB2	2.48119	-1.69337	6.4867	7.20166e-10	2.08461e-08	Significantly downregulated (Adj-P<0.01)
ENSG00000122378.13_PRXL2A	PRXL2A	-0.539758	5.03162	-6.0066	9.26417e-09	1.88573e-07	Significantly downregulated (Adj-P<0.01)
ENSG00000196867.7_ZFP28	ZFP28	0.466055	1.79526	5.95928	1.18369e-08	2.32304e-07	Significantly downregulated (Adj-P<0.01)
ENSG00000173914.11_RBM4B	RBM4B	0.361411	3.06009	5.97442	1.09454e-08	2.18042e-07	Significantly downregulated (Adj-P<0.01)
ENSG00000102531.16_FNDC3A	FNDC3A	0.429673	4.56496	5.99423	9.8782e-09	1.99537e-07	Significantly downregulated (Adj-P<0.01)
ENSG00000187642.9_PERM1	PERM1	-0.630993	7.9025	-5.98665	1.02738e-08	2.06857e-07	Significantly downregulated (Adj-P<0.01)
ENSG00000189136.9_UBE2Q2P1	UBE2Q2P1	0.683332	0.893538	5.95155	1.23189e-08	2.40576e-07	Significantly downregulated (Adj-P<0.01)
ENSG00000185760.15_KCNQ5	KCNQ5	0.748705	5.92506	5.99667	9.75366e-09	1.97524e-07	Significantly downregulated (Adj-P<0.01)
ENSG00000101752.11_MIB1	MIB1	0.499427	3.80456	5.97676	1.08136e-08	2.15688e-07	Significantly downregulated (Adj-P<0.01)
ENSG00000072062.13_PRKACA	PRKACA	-0.329983	7.51526	-5.98441	1.03938e-08	2.08888e-07	Significantly downregulated (Adj-P<0.01)
ENSG00000172775.16_FAM192A	FAM192A	-0.202852	4.95935	-5.99202	9.99177e-09	2.01575e-07	Significantly downregulated (Adj-P<0.01)
ENSG00000198205.6_ZXDA	ZXDA	0.491516	2.31276	5.94887	1.24902e-08	2.43322e-07	Significantly downregulated (Adj-P<0.01)
ENSG00000002016.17_RAD52	RAD52	0.552998	3.61865	5.96937	1.12353e-08	2.227e-07	Significantly downregulated (Adj-P<0.01)
ENSG00000102225.15_CDK16	CDK16	-0.284082	6.86528	-5.98089	1.05853e-08	2.12468e-07	Significantly downregulated (Adj-P<0.01)
ENSG00000184047.17_DIABLO	DIABLO	-0.234576	3.84715	-5.97851	1.07164e-08	2.14558e-07	Significantly downregulated (Adj-P<0.01)
ENSG00000176261.15_ZBTB8OS	ZBTB8OS	-0.328321	2.75633	-5.95966	1.18137e-08	2.32136e-07	Significantly downregulated (Adj-P<0.01)
ENSG00000114757.18_PEX5L	PEX5L	0.9855	0.549438	5.95286	1.22358e-08	2.3944e-07	Significantly downregulated (Adj-P<0.01)
ENSG00000100918.12_REC8	REC8	-0.684744	0.201646	-5.93592	1.33533e-08	2.57438e-07	Significantly downregulated (Adj-P<0.01)
ENSG00000123080.10_CDKN2C	CDKN2C	-0.529225	3.02755	-5.96255	1.16382e-08	2.29569e-07	Significantly downregulated (Adj-P<0.01)
ENSG00000136280.16_CCM2	CCM2	-0.362572	4.45557	-5.97795	1.07472e-08	2.14904e-07	Significantly downregulated (Adj-P<0.01)
ENSG00000117868.15_ESYT2	ESYT2	0.273237	6.05047	5.97886	1.06967e-08	2.14434e-07	Significantly downregulated (Adj-P<0.01)
ENSG00000136153.19_LMO7	LMO7	0.377441	7.30715	5.97012	1.1192e-08	2.2212e-07	Significantly downregulated (Adj-P<0.01)
ENSG00000111371.15_SLC38A1	SLC38A1	-1.49355	3.47284	-5.96058	1.17574e-08	2.31317e-07	Significantly downregulated (Adj-P<0.01)
ENSG00000280323.1_AC053503.6	AC053503.6	-0.834603	2.9003	-5.94742	1.2584e-08	2.43952e-07	Significantly downregulated (Adj-P<0.01)
ENSG00000119139.19_TJP2	TJP2	0.632341	4.47367	5.96229	1.16541e-08	2.29569e-07	Significantly downregulated (Adj-P<0.01)
ENSG00000135063.19_FAM189A2	FAM189A2	0.439266	5.92087	5.96697	1.13753e-08	2.24914e-07	Significantly downregulated (Adj-P<0.01)
ENSG00000275066.4_SYNRG	SYNRG	0.318086	4.10923	5.95633	1.20184e-08	2.35575e-07	Significantly downregulated (Adj-P<0.01)
ENSG00000132475.10_H3F3B	H3F3B	0.420335	7.03118	5.96233	1.1652e-08	2.29569e-07	Significantly downregulated (Adj-P<0.01)
ENSG00000272086.1_AC025181.2	AC025181.2	-0.697502	-0.179752	-5.92462	1.41534e-08	2.70088e-07	Significantly downregulated (Adj-P<0.01)
ENSG00000156042.17_CFAP70	CFAP70	0.576672	1.6976	5.91206	1.50973e-08	2.8638e-07	Significantly downregulated (Adj-P<0.01)
ENSG00000134330.18_IAH1	IAH1	-0.288187	3.98039	-5.9527	1.22457e-08	2.3944e-07	Significantly downregulated (Adj-P<0.01)
ENSG00000180769.8_WDFY3-AS2	WDFY3-AS2	-0.74989	1.4887	-5.90955	1.52934e-08	2.89064e-07	Significantly downregulated (Adj-P<0.01)
ENSG00000166582.9_CENPV	CENPV	-0.478101	3.67703	-5.94781	1.25592e-08	2.43769e-07	Significantly downregulated (Adj-P<0.01)
ENSG00000164182.10_NDUFAF2	NDUFAF2	-0.334964	3.73786	-5.94784	1.25569e-08	2.43769e-07	Significantly downregulated (Adj-P<0.01)
ENSG00000125848.9_FLRT3	FLRT3	1.06695	2.26673	5.90753	1.54528e-08	2.91383e-07	Significantly downregulated (Adj-P<0.01)
ENSG00000133059.16_DSTYK	DSTYK	0.333189	4.19431	5.9434	1.28481e-08	2.48463e-07	Significantly downregulated (Adj-P<0.01)
ENSG00000164068.15_RNF123	RNF123	-0.314779	7.49733	-5.94432	1.27872e-08	2.47589e-07	Significantly downregulated (Adj-P<0.01)
ENSG00000181800.5_CELF2-AS1	CELF2-AS1	2.72122	-1.4349	6.25179	2.5517e-09	6.14538e-08	Significantly downregulated (Adj-P<0.01)
ENSG00000106479.10_ZNF862	ZNF862	0.345788	3.47744	5.93275	1.35728e-08	2.60575e-07	Significantly downregulated (Adj-P<0.01)
ENSG00000196636.7_SDHAF3	SDHAF3	-0.356449	2.92882	-5.92686	1.39908e-08	2.67629e-07	Significantly downregulated (Adj-P<0.01)
ENSG00000120860.10_WASHC3	WASHC3	-0.35203	3.30998	-5.93399	1.34864e-08	2.5923e-07	Significantly downregulated (Adj-P<0.01)
ENSG00000143384.12_MCL1	MCL1	0.389143	7.60873	5.93488	1.34245e-08	2.58352e-07	Significantly downregulated (Adj-P<0.01)
ENSG00000178585.14_CTNNBIP1	CTNNBIP1	-0.539774	4.04231	-5.93581	1.33608e-08	2.57438e-07	Significantly downregulated (Adj-P<0.01)
ENSG00000119509.12_INVS	INVS	0.536089	1.65278	5.88848	1.70399e-08	3.17166e-07	Significantly downregulated (Adj-P<0.01)
ENSG00000180626.9_ZNF594	ZNF594	0.501756	2.4035	5.89628	1.63721e-08	3.05811e-07	Significantly downregulated (Adj-P<0.01)
ENSG00000130856.16_ZNF236	ZNF236	0.496735	2.95185	5.90437	1.5706e-08	2.95806e-07	Significantly downregulated (Adj-P<0.01)
ENSG00000165678.20_GHITM	GHITM	-0.318541	8.02872	-5.925	1.41258e-08	2.69887e-07	Significantly downregulated (Adj-P<0.01)
ENSG00000243989.8_ACY1	ACY1	-0.494932	3.78481	-5.92929	1.3817e-08	2.64623e-07	Significantly downregulated (Adj-P<0.01)
ENSG00000198521.11_ZNF43	ZNF43	-0.745758	1.4406	-5.88646	1.72177e-08	3.201e-07	Significantly downregulated (Adj-P<0.01)
ENSG00000123636.17_BAZ2B	BAZ2B	0.496376	4.47405	5.92399	1.41991e-08	2.70635e-07	Significantly downregulated (Adj-P<0.01)
ENSG00000107736.20_CDH23	CDH23	-0.664878	2.8396	-5.91125	1.51609e-08	2.869e-07	Significantly downregulated (Adj-P<0.01)
ENSG00000106344.8_RBM28	RBM28	0.328212	4.91208	5.92981	1.37797e-08	2.64227e-07	Significantly downregulated (Adj-P<0.01)
ENSG00000134748.12_PRPF38A	PRPF38A	0.254479	3.75928	5.91285	1.50365e-08	2.8591e-07	Significantly downregulated (Adj-P<0.01)
ENSG00000267058.1_AC006213.2	AC006213.2	1.23649	-0.950092	6.02689	8.33663e-09	1.71009e-07	Significantly downregulated (Adj-P<0.01)
ENSG00000135940.6_COX5B	COX5B	-0.556253	8.18774	-5.91176	1.51208e-08	2.86484e-07	Significantly downregulated (Adj-P<0.01)
ENSG00000182512.4_GLRX5	GLRX5	-0.447658	6.28682	-5.92174	1.43642e-08	2.73454e-07	Significantly downregulated (Adj-P<0.01)
ENSG00000149212.11_SESN3	SESN3	0.88029	3.4874	5.89419	1.65482e-08	3.08737e-07	Significantly downregulated (Adj-P<0.01)
ENSG00000284879.1_AC133644.3	AC133644.3	0.836254	0.408408	5.88373	1.746e-08	3.23468e-07	Significantly downregulated (Adj-P<0.01)
ENSG00000270659.1_AC079610.2	AC079610.2	-0.893771	-1.00758	-5.91252	1.50619e-08	2.8605e-07	Significantly downregulated (Adj-P<0.01)
ENSG00000225125.2_RANP4	RANP4	1.25272	-0.730938	5.97018	1.11885e-08	2.2212e-07	Significantly downregulated (Adj-P<0.01)
ENSG00000177917.10_ARL6IP6	ARL6IP6	0.42127	2.87128	5.87702	1.80705e-08	3.33611e-07	Significantly downregulated (Adj-P<0.01)
ENSG00000166750.9_SLFN5	SLFN5	0.922866	4.47873	5.89729	1.62876e-08	3.04592e-07	Significantly downregulated (Adj-P<0.01)
ENSG00000169740.13_ZNF32	ZNF32	-0.381297	4.70415	-5.90817	1.54026e-08	2.90781e-07	Significantly downregulated (Adj-P<0.01)
ENSG00000173085.14_COQ2	COQ2	-0.411381	4.44451	-5.90337	1.57868e-08	2.96385e-07	Significantly downregulated (Adj-P<0.01)
ENSG00000173175.14_ADCY5	ADCY5	-0.628147	2.06378	-5.86716	1.90055e-08	3.48845e-07	Significantly downregulated (Adj-P<0.01)
ENSG00000174021.10_GNG5	GNG5	-0.448544	5.52179	-5.90386	1.57476e-08	2.96238e-07	Significantly downregulated (Adj-P<0.01)
ENSG00000100320.22_RBFOX2	RBFOX2	0.336445	7.26075	5.89833	1.62007e-08	3.03325e-07	Significantly downregulated (Adj-P<0.01)
ENSG00000070614.14_NDST1	NDST1	-0.331305	5.50543	-5.9033	1.57928e-08	2.96385e-07	Significantly downregulated (Adj-P<0.01)
ENSG00000164258.11_NDUFS4	NDUFS4	-0.339669	5.97231	-5.90057	1.60157e-08	3.00214e-07	Significantly downregulated (Adj-P<0.01)
ENSG00000172869.14_DMXL1	DMXL1	0.498412	3.81296	5.8772	1.80541e-08	3.33611e-07	Significantly downregulated (Adj-P<0.01)
ENSG00000164136.16_IL15	IL15	0.639467	2.81225	5.85753	1.99653e-08	3.61446e-07	Significantly downregulated (Adj-P<0.01)
ENSG00000003137.8_CYP26B1	CYP26B1	1.65645	0.805699	5.85854	1.98617e-08	3.60394e-07	Significantly downregulated (Adj-P<0.01)
ENSG00000106993.11_CDC37L1	CDC37L1	-0.475348	5.19559	-5.88946	1.69552e-08	3.15959e-07	Significantly downregulated (Adj-P<0.01)
ENSG00000243678.11_NME2	NME2	-0.528107	6.43363	-5.88449	1.73923e-08	3.2259e-07	Significantly downregulated (Adj-P<0.01)
ENSG00000101298.14_SNPH	SNPH	0.574922	2.79962	5.85411	2.03164e-08	3.6655e-07	Significantly downregulated (Adj-P<0.01)
ENSG00000181789.14_COPG1	COPG1	-0.222262	4.85637	-5.88284	1.75398e-08	3.24569e-07	Significantly downregulated (Adj-P<0.01)
ENSG00000137726.16_FXYD6	FXYD6	-0.446986	3.39452	-5.86886	1.88417e-08	3.46238e-07	Significantly downregulated (Adj-P<0.01)
ENSG00000262664.2_OVCA2	OVCA2	-0.39405	3.15489	-5.86393	1.93228e-08	3.52631e-07	Significantly downregulated (Adj-P<0.01)
ENSG00000224609.7_HSD52	HSD52	1.23345	1.58661	5.82611	2.34354e-08	4.16667e-07	Significantly downregulated (Adj-P<0.01)
ENSG00000247627.2_MTND4P12	MTND4P12	-0.929486	-0.94202	-5.86481	1.92361e-08	3.51452e-07	Significantly downregulated (Adj-P<0.01)
ENSG00000139044.11_B4GALNT3	B4GALNT3	1.66315	1.48138	5.82484	2.35871e-08	4.18505e-07	Significantly downregulated (Adj-P<0.01)
ENSG00000181555.20_SETD2	SETD2	0.31049	5.2555	5.87536	1.82249e-08	3.3607e-07	Significantly downregulated (Adj-P<0.01)
ENSG00000092929.11_UNC13D	UNC13D	0.666197	2.89233	5.84739	2.10261e-08	3.76785e-07	Significantly downregulated (Adj-P<0.01)
ENSG00000101745.16_ANKRD12	ANKRD12	0.537531	5.57638	5.86994	1.87374e-08	3.4472e-07	Significantly downregulated (Adj-P<0.01)
ENSG00000003989.17_SLC7A2	SLC7A2	0.506445	8.16133	5.86335	1.93799e-08	3.52861e-07	Significantly downregulated (Adj-P<0.01)
ENSG00000107863.17_ARHGAP21	ARHGAP21	0.434953	5.94482	5.87195	1.85461e-08	3.41596e-07	Significantly downregulated (Adj-P<0.01)
ENSG00000156170.12_NDUFAF6	NDUFAF6	-0.33304	3.79856	-5.86361	1.93541e-08	3.52795e-07	Significantly downregulated (Adj-P<0.01)
ENSG00000167996.15_FTH1	FTH1	-0.478392	9.50559	-5.84785	2.09768e-08	3.76326e-07	Significantly downregulated (Adj-P<0.01)
ENSG00000235162.8_C12orf75	C12orf75	1.58692	4.58696	5.85344	2.03864e-08	3.67115e-07	Significantly downregulated (Adj-P<0.01)
ENSG00000126216.14_TUBGCP3	TUBGCP3	0.340692	3.60532	5.8519	2.05471e-08	3.69453e-07	Significantly downregulated (Adj-P<0.01)
ENSG00000066933.15_MYO9A	MYO9A	0.418772	4.68718	5.8631	1.94049e-08	3.52912e-07	Significantly downregulated (Adj-P<0.01)
ENSG00000162591.15_MEGF6	MEGF6	0.714826	2.98605	5.84014	2.18179e-08	3.90093e-07	Significantly downregulated (Adj-P<0.01)
ENSG00000127125.8_PPCS	PPCS	-0.305437	3.79934	-5.85766	1.99514e-08	3.61446e-07	Significantly downregulated (Adj-P<0.01)
ENSG00000130254.11_SAFB2	SAFB2	0.317614	5.52351	5.86645	1.9075e-08	3.49716e-07	Significantly downregulated (Adj-P<0.01)
ENSG00000120705.12_ETF1	ETF1	-0.288085	5.8606	-5.86532	1.91857e-08	3.5134e-07	Significantly downregulated (Adj-P<0.01)
ENSG00000172466.15_ZNF24	ZNF24	0.355608	5.68402	5.86491	1.92257e-08	3.51452e-07	Significantly downregulated (Adj-P<0.01)
ENSG00000274286.1_ADRA2B	ADRA2B	-0.573003	1.93019	-5.8248	2.35915e-08	4.18505e-07	Significantly downregulated (Adj-P<0.01)
ENSG00000161649.12_CD300LG	CD300LG	-0.76927	3.05599	-5.84376	2.14191e-08	3.83394e-07	Significantly downregulated (Adj-P<0.01)
ENSG00000150893.10_FREM2	FREM2	0.638125	4.22421	5.84865	2.08908e-08	3.75208e-07	Significantly downregulated (Adj-P<0.01)
ENSG00000185989.10_RASA3	RASA3	0.377078	4.34277	5.85633	2.00873e-08	3.63242e-07	Significantly downregulated (Adj-P<0.01)
ENSG00000139180.10_NDUFA9	NDUFA9	-0.378788	6.95708	-5.85424	2.03035e-08	3.6655e-07	Significantly downregulated (Adj-P<0.01)
ENSG00000279400.1_AC008957.3	AC008957.3	1.59265	-0.1795	5.88531	1.7319e-08	3.21607e-07	Significantly downregulated (Adj-P<0.01)
ENSG00000104722.13_NEFM	NEFM	1.99437	-0.653723	5.95023	1.2403e-08	2.41919e-07	Significantly downregulated (Adj-P<0.01)
ENSG00000111817.17_DSE	DSE	0.474167	3.26683	5.82425	2.36574e-08	4.18739e-07	Significantly downregulated (Adj-P<0.01)
ENSG00000116473.14_RAP1A	RAP1A	-0.271634	5.52933	-5.85337	2.0394e-08	3.67115e-07	Significantly downregulated (Adj-P<0.01)
ENSG00000108231.12_LGI1	LGI1	1.18934	2.26028	5.80233	2.64466e-08	4.57899e-07	Significantly downregulated (Adj-P<0.01)
ENSG00000188010.13_MORN2	MORN2	-0.440217	1.78139	-5.80399	2.62247e-08	4.55049e-07	Significantly downregulated (Adj-P<0.01)
ENSG00000270392.2_PFN1P2	PFN1P2	0.941707	0.395399	5.80653	2.58881e-08	4.50193e-07	Significantly downregulated (Adj-P<0.01)
ENSG00000104687.13_GSR	GSR	-0.376499	4.1219	-5.83307	2.2619e-08	4.03508e-07	Significantly downregulated (Adj-P<0.01)
ENSG00000258461.5_AC012651.1	AC012651.1	0.53636	6.56983	5.83511	2.23851e-08	3.99785e-07	Significantly downregulated (Adj-P<0.01)
ENSG00000157502.13_MUM1L1	MUM1L1	0.53799	4.30822	5.824	2.36877e-08	4.18807e-07	Significantly downregulated (Adj-P<0.01)
ENSG00000180257.13_ZNF816	ZNF816	-0.930434	-0.748281	-5.81045	2.5378e-08	4.4229e-07	Significantly downregulated (Adj-P<0.01)
ENSG00000197121.14_PGAP1	PGAP1	0.614445	2.48731	5.79159	2.79283e-08	4.7998e-07	Significantly downregulated (Adj-P<0.01)
ENSG00000168487.18_BMP1	BMP1	-0.516239	3.20671	-5.81983	2.41962e-08	4.26375e-07	Significantly downregulated (Adj-P<0.01)
ENSG00000279551.1_AC025263.3	AC025263.3	1.2783	-0.710546	5.85999	1.97155e-08	3.5815e-07	Significantly downregulated (Adj-P<0.01)
ENSG00000132383.11_RPA1	RPA1	0.266668	6.07354	5.83249	2.26854e-08	4.04239e-07	Significantly downregulated (Adj-P<0.01)
ENSG00000204791.10_SMPD5	SMPD5	-1.16734	-1.81943	-5.82123	2.40241e-08	4.23811e-07	Significantly downregulated (Adj-P<0.01)
ENSG00000101974.14_ATP11C	ATP11C	0.644193	1.49842	5.77639	3.01646e-08	5.13297e-07	Significantly downregulated (Adj-P<0.01)
ENSG00000184924.5_PTRHD1	PTRHD1	-0.426164	3.38492	-5.8179	2.4435e-08	4.28885e-07	Significantly downregulated (Adj-P<0.01)
ENSG00000108924.13_HLF	HLF	0.554228	3.52156	5.80348	2.62925e-08	4.55727e-07	Significantly downregulated (Adj-P<0.01)
ENSG00000177692.11_DNAJC28	DNAJC28	-0.529473	1.21467	-5.77619	3.01958e-08	5.13297e-07	Significantly downregulated (Adj-P<0.01)
ENSG00000036549.12_AC118549.1	AC118549.1	0.351223	4.00203	5.81496	2.48026e-08	4.34168e-07	Significantly downregulated (Adj-P<0.01)
ENSG00000075856.11_SART3	SART3	0.220365	4.70677	5.82302	2.38063e-08	4.20437e-07	Significantly downregulated (Adj-P<0.01)
ENSG00000279089.1_AC005839.1	AC005839.1	0.947598	0.320144	5.8058	2.59851e-08	4.51385e-07	Significantly downregulated (Adj-P<0.01)
ENSG00000135778.11_NTPCR	NTPCR	-0.328003	5.3285	-5.82451	2.36271e-08	4.18669e-07	Significantly downregulated (Adj-P<0.01)
ENSG00000065609.14_SNAP91	SNAP91	3.25254	-2.39696	6.48754	7.16893e-10	2.08082e-08	Significantly downregulated (Adj-P<0.01)
ENSG00000148334.14_PTGES2	PTGES2	-0.452004	5.86152	-5.8178	2.44467e-08	4.28885e-07	Significantly downregulated (Adj-P<0.01)
ENSG00000174547.13_MRPL11	MRPL11	-0.337341	4.72954	-5.81921	2.42724e-08	4.27243e-07	Significantly downregulated (Adj-P<0.01)
ENSG00000129566.12_TEP1	TEP1	0.514885	4.85537	5.81645	2.46151e-08	4.31362e-07	Significantly downregulated (Adj-P<0.01)
ENSG00000086570.12_FAT2	FAT2	1.4571	-1.28072	5.94823	1.25315e-08	2.43769e-07	Significantly downregulated (Adj-P<0.01)
ENSG00000140262.17_TCF12	TCF12	0.32548	4.41458	5.80941	2.55133e-08	4.4416e-07	Significantly downregulated (Adj-P<0.01)
ENSG00000011347.9_SYT7	SYT7	-0.520669	1.42073	-5.76637	3.17331e-08	5.36556e-07	Significantly downregulated (Adj-P<0.01)
ENSG00000163382.11_NAXE	NAXE	-0.457359	4.43334	-5.81389	2.4938e-08	4.35578e-07	Significantly downregulated (Adj-P<0.01)
ENSG00000177084.16_POLE	POLE	0.474766	5.0172	5.81449	2.48623e-08	4.34734e-07	Significantly downregulated (Adj-P<0.01)
ENSG00000121068.13_TBX2	TBX2	-0.663438	2.8719	-5.7895	2.82258e-08	4.84478e-07	Significantly downregulated (Adj-P<0.01)
ENSG00000007923.15_DNAJC11	DNAJC11	-0.24741	5.21852	-5.81084	2.53282e-08	4.41907e-07	Significantly downregulated (Adj-P<0.01)
ENSG00000146414.15_SHPRH	SHPRH	0.621378	2.99777	5.77367	3.05836e-08	5.18777e-07	Significantly downregulated (Adj-P<0.01)
ENSG00000229152.2_ANKRD10-IT1	ANKRD10-IT1	0.790722	1.42753	5.75379	3.38164e-08	5.67551e-07	Significantly downregulated (Adj-P<0.01)
ENSG00000283293.1_RN7SK	RN7SK	-1.3297	1.51735	-5.79276	2.7763e-08	4.78603e-07	Significantly downregulated (Adj-P<0.01)
ENSG00000163220.10_S100A9	S100A9	-2.15706	0.0332325	-5.75122	3.42582e-08	5.74359e-07	Significantly downregulated (Adj-P<0.01)
ENSG00000132330.16_SCLY	SCLY	-0.393492	2.03442	-5.76121	3.25724e-08	5.48993e-07	Significantly downregulated (Adj-P<0.01)
ENSG00000188026.12_RILPL1	RILPL1	-0.332873	6.05985	-5.79685	2.71933e-08	4.69802e-07	Significantly downregulated (Adj-P<0.01)
ENSG00000062485.18_CS	CS	-0.345546	8.65168	-5.78124	2.94323e-08	5.0247e-07	Significantly downregulated (Adj-P<0.01)
ENSG00000185271.8_KLHL33	KLHL33	0.486281	7.0349	5.79214	2.78509e-08	4.79597e-07	Significantly downregulated (Adj-P<0.01)
ENSG00000170144.20_HNRNPA3	HNRNPA3	0.221042	6.78891	5.79305	2.77221e-08	4.78417e-07	Significantly downregulated (Adj-P<0.01)
ENSG00000280987.4_MATR3	MATR3	0.611528	5.20353	5.79155	2.79336e-08	4.7998e-07	Significantly downregulated (Adj-P<0.01)
ENSG00000130821.15_SLC6A8	SLC6A8	-0.396411	6.97597	-5.78784	2.84647e-08	4.88049e-07	Significantly downregulated (Adj-P<0.01)
ENSG00000132640.14_BTBD3	BTBD3	0.420296	4.23695	5.78185	2.93421e-08	5.01468e-07	Significantly downregulated (Adj-P<0.01)
ENSG00000064995.17_TAF11	TAF11	-0.257086	3.71517	-5.77699	3.0073e-08	5.12306e-07	Significantly downregulated (Adj-P<0.01)
ENSG00000114784.3_EIF1B	EIF1B	-0.26202	5.16761	-5.78642	2.86697e-08	4.91035e-07	Significantly downregulated (Adj-P<0.01)
ENSG00000128242.12_GAL3ST1	GAL3ST1	1.16674	-0.689404	5.79803	2.70311e-08	4.67509e-07	Significantly downregulated (Adj-P<0.01)
ENSG00000166311.9_SMPD1	SMPD1	-0.327422	4.49464	-5.78337	2.91168e-08	4.98155e-07	Significantly downregulated (Adj-P<0.01)
ENSG00000145431.10_PDGFC	PDGFC	0.685129	2.4348	5.7368	3.68439e-08	6.13177e-07	Significantly downregulated (Adj-P<0.01)
ENSG00000111252.10_SH2B3	SH2B3	-0.656793	3.51725	-5.76762	3.15328e-08	5.34307e-07	Significantly downregulated (Adj-P<0.01)
ENSG00000249669.9_CARMN	CARMN	-0.784353	3.8754	-5.77575	3.02623e-08	5.13877e-07	Significantly downregulated (Adj-P<0.01)
ENSG00000011566.14_MAP4K3	MAP4K3	0.372442	5.14514	5.77746	3.0002e-08	5.11645e-07	Significantly downregulated (Adj-P<0.01)
ENSG00000184221.12_OLIG1	OLIG1	-1.7206	-1.06176	-5.73545	3.70951e-08	6.16711e-07	Significantly downregulated (Adj-P<0.01)
ENSG00000100139.13_MICALL1	MICALL1	-0.357183	3.54839	-5.76315	3.22543e-08	5.44789e-07	Significantly downregulated (Adj-P<0.01)
ENSG00000122696.13_SLC25A51	SLC25A51	-0.388995	2.05879	-5.73141	3.78567e-08	6.28056e-07	Significantly downregulated (Adj-P<0.01)
ENSG00000167283.7_ATP5MG	ATP5MG	-0.463307	6.83948	-5.76732	3.15815e-08	5.34563e-07	Significantly downregulated (Adj-P<0.01)
ENSG00000257379.1_AC023509.1	AC023509.1	0.555582	2.81799	5.73749	3.6716e-08	6.1169e-07	Significantly downregulated (Adj-P<0.01)
ENSG00000088682.13_COQ9	COQ9	-0.350412	6.97382	-5.76157	3.25128e-08	5.48571e-07	Significantly downregulated (Adj-P<0.01)
ENSG00000166532.15_RIMKLB	RIMKLB	0.571026	3.92984	5.74661	3.50653e-08	5.86651e-07	Significantly downregulated (Adj-P<0.01)
ENSG00000159199.13_ATP5MC1	ATP5MC1	-0.555233	6.27418	-5.75612	3.34211e-08	5.6151e-07	Significantly downregulated (Adj-P<0.01)
ENSG00000106305.9_AIMP2	AIMP2	-0.451031	5.55199	-5.75874	3.29822e-08	5.54723e-07	Significantly downregulated (Adj-P<0.01)
ENSG00000133731.9_IMPA1	IMPA1	-0.454876	3.34287	-5.7385	3.65293e-08	6.09219e-07	Significantly downregulated (Adj-P<0.01)
ENSG00000108654.14_DDX5	DDX5	0.269765	7.52123	5.74781	3.4853e-08	5.83715e-07	Significantly downregulated (Adj-P<0.01)
ENSG00000164989.16_CCDC171	CCDC171	0.883172	0.267393	5.71625	4.08599e-08	6.72959e-07	Significantly downregulated (Adj-P<0.01)
ENSG00000185129.5_PURA	PURA	0.456012	4.67896	5.74383	3.55607e-08	5.94314e-07	Significantly downregulated (Adj-P<0.01)
ENSG00000227456.7_LINC00310	LINC00310	1.32778	1.01475	5.695	4.54608e-08	7.38018e-07	Significantly downregulated (Adj-P<0.01)
ENSG00000267680.5_ZNF224	ZNF224	0.356386	3.12694	5.71794	4.05131e-08	6.67941e-07	Significantly downregulated (Adj-P<0.01)
ENSG00000114867.20_EIF4G1	EIF4G1	-0.262244	8.62192	-5.73047	3.80369e-08	6.30389e-07	Significantly downregulated (Adj-P<0.01)
ENSG00000080845.17_DLGAP4	DLGAP4	-0.30477	6.01939	-5.74331	3.56529e-08	5.95228e-07	Significantly downregulated (Adj-P<0.01)
ENSG00000177943.13_MAMDC4	MAMDC4	-0.620798	2.54431	-5.71894	4.03091e-08	6.65267e-07	Significantly downregulated (Adj-P<0.01)
ENSG00000115526.10_CHST10	CHST10	-0.341085	2.05809	-5.69724	4.49523e-08	7.30509e-07	Significantly downregulated (Adj-P<0.01)
ENSG00000105327.17_BBC3	BBC3	0.897112	1.63435	5.68498	4.78024e-08	7.68176e-07	Significantly downregulated (Adj-P<0.01)
ENSG00000285108.1_AC103718.1	AC103718.1	2.03893	-0.734096	5.83064	2.29005e-08	4.07614e-07	Significantly downregulated (Adj-P<0.01)
ENSG00000130158.13_DOCK6	DOCK6	-0.553591	4.26395	-5.73222	3.77033e-08	6.26166e-07	Significantly downregulated (Adj-P<0.01)
ENSG00000196233.13_LCOR	LCOR	0.477622	4.8022	5.72597	3.89089e-08	6.44168e-07	Significantly downregulated (Adj-P<0.01)
ENSG00000131848.9_ZSCAN5A	ZSCAN5A	-0.610674	-0.00146367	-5.67449	5.03814e-08	8.03926e-07	Significantly downregulated (Adj-P<0.01)
ENSG00000173812.10_EIF1	EIF1	-0.266477	9.18121	-5.70641	4.29303e-08	7.02685e-07	Significantly downregulated (Adj-P<0.01)
ENSG00000113555.5_PCDH12	PCDH12	-0.672804	2.25954	-5.68569	4.76323e-08	7.66219e-07	Significantly downregulated (Adj-P<0.01)
ENSG00000187240.14_DYNC2H1	DYNC2H1	0.747432	0.568733	5.6754	5.0151e-08	8.01053e-07	Significantly downregulated (Adj-P<0.01)
ENSG00000162885.12_B3GALNT2	B3GALNT2	0.4856	4.65084	5.71509	4.10974e-08	6.7617e-07	Significantly downregulated (Adj-P<0.01)
ENSG00000269604.1_AC005523.2	AC005523.2	-0.321118	9.08555	-5.70121	4.40667e-08	7.19062e-07	Significantly downregulated (Adj-P<0.01)
ENSG00000143624.13_INTS3	INTS3	0.23521	5.37955	5.71989	4.01179e-08	6.628e-07	Significantly downregulated (Adj-P<0.01)
ENSG00000090924.14_PLEKHG2	PLEKHG2	-0.598685	2.51354	-5.68882	4.68908e-08	7.5659e-07	Significantly downregulated (Adj-P<0.01)
ENSG00000081386.12_ZNF510	ZNF510	0.450349	2.93268	5.68124	4.87074e-08	7.81139e-07	Significantly downregulated (Adj-P<0.01)
ENSG00000205978.5_NYNRIN	NYNRIN	-0.541745	2.67713	-5.68649	4.74414e-08	7.63922e-07	Significantly downregulated (Adj-P<0.01)
ENSG00000178307.9_TMEM11	TMEM11	-0.36995	5.33951	-5.71393	4.13388e-08	6.79437e-07	Significantly downregulated (Adj-P<0.01)
ENSG00000120733.13_KDM3B	KDM3B	0.317449	6.11224	5.71358	4.14102e-08	6.79907e-07	Significantly downregulated (Adj-P<0.01)
ENSG00000185689.16_C6orf201	C6orf201	1.73233	-0.925291	5.81842	2.43699e-08	4.28484e-07	Significantly downregulated (Adj-P<0.01)
ENSG00000170310.14_STX8	STX8	-0.330361	3.51021	-5.69897	4.45651e-08	7.25703e-07	Significantly downregulated (Adj-P<0.01)
ENSG00000125648.14_SLC25A23	SLC25A23	-0.282765	6.06953	-5.70792	4.26062e-08	6.98821e-07	Significantly downregulated (Adj-P<0.01)
ENSG00000226950.6_DANCR	DANCR	-0.427482	4.11995	-5.70529	4.31729e-08	7.05928e-07	Significantly downregulated (Adj-P<0.01)
ENSG00000130962.17_PRRG1	PRRG1	0.564402	4.42858	5.69969	4.44042e-08	7.23824e-07	Significantly downregulated (Adj-P<0.01)
ENSG00000115524.15_SF3B1	SF3B1	0.247203	7.42042	5.70232	4.38213e-08	7.15792e-07	Significantly downregulated (Adj-P<0.01)
ENSG00000134375.10_TIMM17A	TIMM17A	-0.302472	5.70151	-5.70695	4.28131e-08	7.0149e-07	Significantly downregulated (Adj-P<0.01)
ENSG00000147485.12_PXDNL	PXDNL	1.40715	1.06242	5.64872	5.73052e-08	9.04408e-07	Significantly downregulated (Adj-P<0.01)
ENSG00000030110.12_BAK1	BAK1	-0.517908	3.40355	-5.69179	4.61987e-08	7.46182e-07	Significantly downregulated (Adj-P<0.01)
ENSG00000184675.10_AMER1	AMER1	-0.500762	3.24616	-5.68671	4.739e-08	7.63869e-07	Significantly downregulated (Adj-P<0.01)
ENSG00000160097.17_FNDC5	FNDC5	-0.723715	7.34469	-5.69439	4.56001e-08	7.38425e-07	Significantly downregulated (Adj-P<0.01)
ENSG00000215105.4_TTC3P1	TTC3P1	0.865763	1.44584	5.64411	5.8637e-08	9.21761e-07	Significantly downregulated (Adj-P<0.01)
ENSG00000184014.7_DENND5A	DENND5A	-0.337003	4.41936	-5.69448	4.55802e-08	7.38425e-07	Significantly downregulated (Adj-P<0.01)
ENSG00000113048.16_MRPS27	MRPS27	-0.270275	5.6045	-5.69428	4.56254e-08	7.38425e-07	Significantly downregulated (Adj-P<0.01)
ENSG00000004399.12_PLXND1	PLXND1	-0.518012	4.69068	-5.69362	4.57761e-08	7.40109e-07	Significantly downregulated (Adj-P<0.01)
ENSG00000187630.16_DHRS4L2	DHRS4L2	-0.637248	3.87046	-5.68472	4.78653e-08	7.68409e-07	Significantly downregulated (Adj-P<0.01)
ENSG00000278318.4_ZNF229	ZNF229	0.749552	0.870058	5.63382	6.17231e-08	9.64545e-07	Significantly downregulated (Adj-P<0.01)
ENSG00000183688.4_RFLNB	RFLNB	-0.528127	3.22672	-5.66572	5.26388e-08	8.36582e-07	Significantly downregulated (Adj-P<0.01)
ENSG00000156411.9_ATP5MPL	ATP5MPL	-0.499101	6.41537	-5.68011	4.89835e-08	7.84774e-07	Significantly downregulated (Adj-P<0.01)
ENSG00000213551.4_DNAJC9	DNAJC9	0.256201	3.26038	5.65497	5.55456e-08	8.78185e-07	Significantly downregulated (Adj-P<0.01)
ENSG00000170624.13_SGCD	SGCD	0.412547	6.81349	5.6774	4.96532e-08	7.93901e-07	Significantly downregulated (Adj-P<0.01)
ENSG00000150637.8_CD226	CD226	0.904604	0.0118739	5.64786	5.75493e-08	9.07359e-07	Significantly downregulated (Adj-P<0.01)
ENSG00000165821.11_SALL2	SALL2	-0.71357	0.191555	-5.62045	6.59699e-08	1.01987e-06	Significantly downregulated (Adj-P<0.01)
ENSG00000163930.9_BAP1	BAP1	-0.22559	5.84223	-5.67793	4.95213e-08	7.9259e-07	Significantly downregulated (Adj-P<0.01)
ENSG00000101247.17_NDUFAF5	NDUFAF5	-0.366282	4.17028	-5.67245	5.08986e-08	8.11362e-07	Significantly downregulated (Adj-P<0.01)
ENSG00000198435.3_NRARP	NRARP	-0.914367	-0.0882801	-5.6186	6.65776e-08	1.02826e-06	Significantly downregulated (Adj-P<0.01)
ENSG00000102710.19_SUPT20H	SUPT20H	0.313564	3.89857	5.66088	5.39277e-08	8.55354e-07	Significantly downregulated (Adj-P<0.01)
ENSG00000272742.1_AC135457.1	AC135457.1	-1.43098	-0.577669	-5.62083	6.58444e-08	1.01892e-06	Significantly downregulated (Adj-P<0.01)
ENSG00000085871.8_MGST2	MGST2	-0.335825	4.24303	-5.66982	5.15716e-08	8.20444e-07	Significantly downregulated (Adj-P<0.01)
ENSG00000257542.5_OR7E47P	OR7E47P	-0.896895	1.61001	-5.62969	6.30064e-08	9.817e-07	Significantly downregulated (Adj-P<0.01)
ENSG00000130559.18_CAMSAP1	CAMSAP1	0.287059	6.09111	5.67003	5.15168e-08	8.20393e-07	Significantly downregulated (Adj-P<0.01)
ENSG00000107938.17_EDRF1	EDRF1	0.324307	3.43763	5.64564	5.81922e-08	9.16584e-07	Significantly downregulated (Adj-P<0.01)
ENSG00000159128.14_IFNGR2	IFNGR2	-0.359502	4.0292	-5.65822	5.4649e-08	8.65067e-07	Significantly downregulated (Adj-P<0.01)
ENSG00000119125.16_GDA	GDA	3.60781	1.07695	5.65992	5.41881e-08	8.58627e-07	Significantly downregulated (Adj-P<0.01)
ENSG00000166881.9_NEMP1	NEMP1	0.502912	2.09377	5.61285	6.85093e-08	1.05502e-06	Significantly downregulated (Adj-P<0.01)
ENSG00000141556.20_TBCD	TBCD	-0.25745	4.98868	-5.66394	5.31103e-08	8.43232e-07	Significantly downregulated (Adj-P<0.01)
ENSG00000215068.7_AC025171.2	AC025171.2	0.623113	1.43683	5.60524	7.1149e-08	1.09178e-06	Significantly downregulated (Adj-P<0.01)
ENSG00000185361.8_TNFAIP8L1	TNFAIP8L1	-0.505709	2.57789	-5.63044	6.27712e-08	9.78997e-07	Significantly downregulated (Adj-P<0.01)
ENSG00000156453.13_PCDH1	PCDH1	-0.568624	2.85485	-5.63655	6.08894e-08	9.54335e-07	Significantly downregulated (Adj-P<0.01)
ENSG00000140263.13_SORD	SORD	-0.438638	2.27475	-5.62229	6.53677e-08	1.01352e-06	Significantly downregulated (Adj-P<0.01)
ENSG00000184702.19_SEPT5	2020-09-05	0.934113	2.20358	5.61009	6.94552e-08	1.06855e-06	Significantly downregulated (Adj-P<0.01)
ENSG00000101166.15_PRELID3B	PRELID3B	-0.30313	3.64487	-5.64464	5.84812e-08	9.20225e-07	Significantly downregulated (Adj-P<0.01)
ENSG00000263001.5_GTF2I	GTF2I	0.302378	6.91419	5.65481	5.55883e-08	8.78185e-07	Significantly downregulated (Adj-P<0.01)
ENSG00000175581.13_MRPL48	MRPL48	-0.302045	3.48478	-5.63546	6.12209e-08	9.58584e-07	Significantly downregulated (Adj-P<0.01)
ENSG00000100784.11_RPS6KA5	RPS6KA5	0.567073	3.60894	5.6214	6.56587e-08	1.01704e-06	Significantly downregulated (Adj-P<0.01)
ENSG00000136925.14_TSTD2	TSTD2	0.377379	3.89233	5.63289	6.20091e-08	9.68062e-07	Significantly downregulated (Adj-P<0.01)
ENSG00000214357.8_NEURL1B	NEURL1B	-0.5511	4.30928	-5.64031	5.97572e-08	9.37515e-07	Significantly downregulated (Adj-P<0.01)
ENSG00000006047.12_YBX2	YBX2	-0.753977	0.884127	-5.58911	7.70704e-08	1.16872e-06	Significantly downregulated (Adj-P<0.01)
ENSG00000124193.14_SRSF6	SRSF6	0.269663	5.74309	5.64255	5.9094e-08	9.28027e-07	Significantly downregulated (Adj-P<0.01)
ENSG00000171617.13_ENC1	ENC1	1.13797	2.51576	5.58978	7.68157e-08	1.16597e-06	Significantly downregulated (Adj-P<0.01)
ENSG00000187231.13_SESTD1	SESTD1	0.412343	3.04559	5.60517	7.11715e-08	1.09178e-06	Significantly downregulated (Adj-P<0.01)
ENSG00000118507.16_AKAP7	AKAP7	-0.489498	3.6829	-5.62513	6.44512e-08	1.00184e-06	Significantly downregulated (Adj-P<0.01)
ENSG00000086102.18_NFX1	NFX1	0.232865	5.11748	5.63524	6.12869e-08	9.58671e-07	Significantly downregulated (Adj-P<0.01)
ENSG00000170734.11_POLH	POLH	0.337899	2.72412	5.59706	7.40947e-08	1.13443e-06	Significantly downregulated (Adj-P<0.01)
ENSG00000160439.15_RDH13	RDH13	-0.44423	3.83031	-5.6275	6.36941e-08	9.91443e-07	Significantly downregulated (Adj-P<0.01)
ENSG00000023516.8_AKAP11	AKAP11	0.502332	4.03023	5.61784	6.68297e-08	1.03115e-06	Significantly downregulated (Adj-P<0.01)
ENSG00000180573.9_HIST1H2AC	HIST1H2AC	0.519741	3.61589	5.61549	6.76161e-08	1.04227e-06	Significantly downregulated (Adj-P<0.01)
ENSG00000131263.12_RLIM	RLIM	0.353342	4.39497	5.62501	6.44882e-08	1.00184e-06	Significantly downregulated (Adj-P<0.01)
ENSG00000276234.4_TADA2A	TADA2A	0.313937	2.93221	5.59215	7.59213e-08	1.1546e-06	Significantly downregulated (Adj-P<0.01)
ENSG00000116580.18_GON4L	GON4L	0.230379	4.77064	5.62365	6.4929e-08	1.0077e-06	Significantly downregulated (Adj-P<0.01)
ENSG00000106351.12_AGFG2	AGFG2	-0.353539	2.52844	-5.59055	7.65226e-08	1.16263e-06	Significantly downregulated (Adj-P<0.01)
ENSG00000125337.17_KIF25	KIF25	-1.12333	-1.29787	-5.57967	8.07601e-08	1.21885e-06	Significantly downregulated (Adj-P<0.01)
ENSG00000183826.17_BTBD9	BTBD9	-0.352786	3.88731	-5.60765	7.03023e-08	1.08053e-06	Significantly downregulated (Adj-P<0.01)
ENSG00000223784.2_LINP1	LINP1	-0.538238	2.99791	-5.59452	7.50323e-08	1.14437e-06	Significantly downregulated (Adj-P<0.01)
ENSG00000176971.3_FIBIN	FIBIN	0.990421	1.22416	5.54846	9.42206e-08	1.39807e-06	Significantly downregulated (Adj-P<0.01)
ENSG00000158019.20_BABAM2	BABAM2	-0.287609	4.2264	-5.60443	7.14349e-08	1.09476e-06	Significantly downregulated (Adj-P<0.01)
ENSG00000197779.13_ZNF81	ZNF81	0.797397	0.554183	5.55195	9.2611e-08	1.37806e-06	Significantly downregulated (Adj-P<0.01)
ENSG00000250133.2_HOXC-AS2	HOXC-AS2	-0.54752	0.562936	-5.54393	9.63473e-08	1.42431e-06	Significantly downregulated (Adj-P<0.01)
ENSG00000260337.3_AC091544.4	AC091544.4	1.63174	0.0795044	5.58408	7.9016e-08	1.1948e-06	Significantly downregulated (Adj-P<0.01)
ENSG00000120616.15_EPC1	EPC1	0.265245	4.45035	5.59354	7.53994e-08	1.14776e-06	Significantly downregulated (Adj-P<0.01)
ENSG00000061936.9_SFSWAP	SFSWAP	0.200361	4.84063	5.59569	7.45981e-08	1.14103e-06	Significantly downregulated (Adj-P<0.01)
ENSG00000119487.16_MAPKAP1	MAPKAP1	-0.266132	5.97305	-5.59514	7.48036e-08	1.14308e-06	Significantly downregulated (Adj-P<0.01)
ENSG00000072134.15_EPN2	EPN2	-0.20629	4.53116	-5.59394	7.52483e-08	1.14656e-06	Significantly downregulated (Adj-P<0.01)
ENSG00000172766.18_NAA16	NAA16	0.409806	3.65934	5.57506	8.26231e-08	1.24531e-06	Significantly downregulated (Adj-P<0.01)
ENSG00000155858.5_LSM11	LSM11	0.500246	1.66931	5.53314	1.01605e-07	1.4923e-06	Significantly downregulated (Adj-P<0.01)
ENSG00000166377.20_ATP9B	ATP9B	0.380186	3.3878	5.56888	8.51881e-08	1.27839e-06	Significantly downregulated (Adj-P<0.01)
ENSG00000176871.8_WSB2	WSB2	-0.313509	6.19191	-5.5853	7.85404e-08	1.18987e-06	Significantly downregulated (Adj-P<0.01)
ENSG00000100321.14_SYNGR1	SYNGR1	-0.343279	4.10596	-5.58304	7.9425e-08	1.19984e-06	Significantly downregulated (Adj-P<0.01)
ENSG00000164944.11_VIRMA	VIRMA	0.297389	4.11675	5.5742	8.29738e-08	1.2487e-06	Significantly downregulated (Adj-P<0.01)
ENSG00000169116.11_PARM1	PARM1	0.531398	5.0769	5.58414	7.8993e-08	1.1948e-06	Significantly downregulated (Adj-P<0.01)
ENSG00000126822.16_PLEKHG3	PLEKHG3	-0.498984	3.32158	-5.57049	8.45114e-08	1.26943e-06	Significantly downregulated (Adj-P<0.01)
ENSG00000065361.15_ERBB3	ERBB3	2.56908	1.34916	5.52625	1.05109e-07	1.53771e-06	Significantly downregulated (Adj-P<0.01)
ENSG00000153786.12_ZDHHC7	ZDHHC7	-0.252973	5.7959	-5.57494	8.26703e-08	1.24531e-06	Significantly downregulated (Adj-P<0.01)
ENSG00000135469.13_COQ10A	COQ10A	-0.49002	7.1009	-5.56612	8.6355e-08	1.29345e-06	Significantly downregulated (Adj-P<0.01)
ENSG00000140043.11_PTGR2	PTGR2	-0.34369	5.09086	-5.57159	8.40533e-08	1.26374e-06	Significantly downregulated (Adj-P<0.01)
ENSG00000214160.9_ALG3	ALG3	-0.314874	3.02274	-5.54904	9.395e-08	1.39667e-06	Significantly downregulated (Adj-P<0.01)
ENSG00000171867.16_PRNP	PRNP	0.370725	5.27797	5.56718	8.59034e-08	1.2879e-06	Significantly downregulated (Adj-P<0.01)
ENSG00000189283.9_FHIT	FHIT	-0.603513	0.748847	-5.50573	1.1625e-07	1.67335e-06	Significantly downregulated (Adj-P<0.01)
ENSG00000142949.16_PTPRF	PTPRF	1.47531	1.75143	5.50085	1.19068e-07	1.70618e-06	Significantly downregulated (Adj-P<0.01)
ENSG00000138434.16_ITPRID2	ITPRID2	0.329372	6.18098	5.56281	8.77802e-08	1.31356e-06	Significantly downregulated (Adj-P<0.01)
ENSG00000143257.11_NR1I3	NR1I3	-0.752702	-0.506795	-5.50548	1.16396e-07	1.67393e-06	Significantly downregulated (Adj-P<0.01)
ENSG00000112110.9_MRPL18	MRPL18	-0.295716	4.14143	-5.55547	9.10208e-08	1.35579e-06	Significantly downregulated (Adj-P<0.01)
ENSG00000173614.13_NMNAT1	NMNAT1	-0.477991	4.7383	-5.55951	8.92228e-08	1.33389e-06	Significantly downregulated (Adj-P<0.01)
ENSG00000168273.7_SMIM4	SMIM4	-0.498046	3.35495	-5.54772	9.45636e-08	1.40144e-06	Significantly downregulated (Adj-P<0.01)
ENSG00000133687.15_TMTC1	TMTC1	0.464245	5.27773	5.5558	9.08715e-08	1.35579e-06	Significantly downregulated (Adj-P<0.01)
ENSG00000100575.13_TIMM9	TIMM9	-0.349203	3.25212	-5.53751	9.94417e-08	1.46596e-06	Significantly downregulated (Adj-P<0.01)
ENSG00000135617.3_PRADC1	PRADC1	-0.491089	5.13518	-5.55545	9.10291e-08	1.35579e-06	Significantly downregulated (Adj-P<0.01)
ENSG00000177106.15_EPS8L2	EPS8L2	1.54751	-0.73208	5.55919	8.93648e-08	1.33476e-06	Significantly downregulated (Adj-P<0.01)
ENSG00000102870.5_ZNF629	ZNF629	-0.41553	4.11751	-5.54759	9.46239e-08	1.40144e-06	Significantly downregulated (Adj-P<0.01)
ENSG00000102921.7_N4BP1	N4BP1	-0.236561	4.52186	-5.54879	9.40685e-08	1.39712e-06	Significantly downregulated (Adj-P<0.01)
ENSG00000151247.12_EIF4E	EIF4E	-0.269204	4.36264	-5.54611	9.53194e-08	1.41043e-06	Significantly downregulated (Adj-P<0.01)
ENSG00000104691.14_UBXN8	UBXN8	-0.474993	0.551925	-5.48078	1.31363e-07	1.86052e-06	Significantly downregulated (Adj-P<0.01)
ENSG00000053438.9_NNAT	NNAT	0.79709	1.93799	5.48649	1.27744e-07	1.81574e-06	Significantly downregulated (Adj-P<0.01)
ENSG00000137693.13_YAP1	YAP1	0.434661	6.44159	5.54074	9.78753e-08	1.44555e-06	Significantly downregulated (Adj-P<0.01)
ENSG00000196367.13_TRRAP	TRRAP	0.295055	4.91022	5.53918	9.863e-08	1.45534e-06	Significantly downregulated (Adj-P<0.01)
ENSG00000268043.7_NBPF12	NBPF12	0.38481	2.41363	5.49502	1.22519e-07	1.75089e-06	Significantly downregulated (Adj-P<0.01)
ENSG00000136143.15_SUCLA2	SUCLA2	-0.363201	7.2803	-5.52921	1.03588e-07	1.51862e-06	Significantly downregulated (Adj-P<0.01)
ENSG00000116120.9_FARSB	FARSB	-0.267372	4.67616	-5.5348	1.0078e-07	1.48294e-06	Significantly downregulated (Adj-P<0.01)
ENSG00000095066.11_HOOK2	HOOK2	-0.608414	5.27338	-5.53575	1.0031e-07	1.47738e-06	Significantly downregulated (Adj-P<0.01)
ENSG00000167985.6_SDHAF2	SDHAF2	-0.317765	3.26735	-5.52009	1.08341e-07	1.57377e-06	Significantly downregulated (Adj-P<0.01)
ENSG00000168214.20_RBPJ	RBPJ	0.310929	5.1701	5.53344	1.01455e-07	1.49148e-06	Significantly downregulated (Adj-P<0.01)
ENSG00000196724.12_ZNF418	ZNF418	0.543681	1.44514	5.4702	1.38329e-07	1.94703e-06	Significantly downregulated (Adj-P<0.01)
ENSG00000030304.13_MUSK	MUSK	2.23902	-1.12137	5.72391	3.93143e-08	6.50201e-07	Significantly downregulated (Adj-P<0.01)
ENSG00000103145.10_HCFC1R1	HCFC1R1	-0.791923	6.16845	-5.52611	1.05181e-07	1.53771e-06	Significantly downregulated (Adj-P<0.01)
ENSG00000066056.13_TIE1	TIE1	-0.523395	3.69591	-5.52081	1.07956e-07	1.57105e-06	Significantly downregulated (Adj-P<0.01)
ENSG00000105341.18_DMAC2	DMAC2	-0.289331	5.03218	-5.53001	1.03184e-07	1.51409e-06	Significantly downregulated (Adj-P<0.01)
ENSG00000107611.15_CUBN	CUBN	0.66012	0.497993	5.46929	1.38944e-07	1.94975e-06	Significantly downregulated (Adj-P<0.01)
ENSG00000157570.11_TSPAN18	TSPAN18	-0.516869	3.42626	-5.51304	1.12158e-07	1.62328e-06	Significantly downregulated (Adj-P<0.01)
ENSG00000134574.11_DDB2	DDB2	0.447045	2.55116	5.485	1.28678e-07	1.82576e-06	Significantly downregulated (Adj-P<0.01)
ENSG00000156110.13_ADK	ADK	-0.369445	3.82291	-5.51678	1.10117e-07	1.59811e-06	Significantly downregulated (Adj-P<0.01)
ENSG00000131080.14_EDA2R	EDA2R	1.80937	0.561348	5.49293	1.23777e-07	1.76569e-06	Significantly downregulated (Adj-P<0.01)
ENSG00000149600.11_COMMD7	COMMD7	-0.285514	4.80607	-5.5241	1.06227e-07	1.55158e-06	Significantly downregulated (Adj-P<0.01)
ENSG00000198838.13_RYR3	RYR3	1.13466	6.3047	5.52307	1.06765e-07	1.55795e-06	Significantly downregulated (Adj-P<0.01)
ENSG00000119705.9_SLIRP	SLIRP	-0.466595	4.67956	-5.52289	1.0686e-07	1.55795e-06	Significantly downregulated (Adj-P<0.01)
ENSG00000204370.10_SDHD	SDHD	-0.305825	7.25724	-5.51542	1.10855e-07	1.60589e-06	Significantly downregulated (Adj-P<0.01)
ENSG00000111640.14_GAPDH	GAPDH	-0.498544	12.7012	-5.47562	1.34714e-07	1.90121e-06	Significantly downregulated (Adj-P<0.01)
ENSG00000057663.15_ATG5	ATG5	-0.288581	3.86912	-5.51116	1.13194e-07	1.6338e-06	Significantly downregulated (Adj-P<0.01)
ENSG00000129003.17_VPS13C	VPS13C	0.398227	5.77325	5.52083	1.07946e-07	1.57105e-06	Significantly downregulated (Adj-P<0.01)
ENSG00000273136.6_NBPF26	NBPF26	0.830546	1.85349	5.45782	1.46944e-07	2.05553e-06	Significantly downregulated (Adj-P<0.01)
ENSG00000100906.10_NFKBIA	NFKBIA	0.660712	5.25145	5.51563	1.10739e-07	1.60566e-06	Significantly downregulated (Adj-P<0.01)
ENSG00000110066.14_KMT5B	KMT5B	0.292016	4.73197	5.51159	1.12956e-07	1.63185e-06	Significantly downregulated (Adj-P<0.01)
ENSG00000160007.18_ARHGAP35	ARHGAP35	-0.374874	6.2534	-5.51201	1.12725e-07	1.63e-06	Significantly downregulated (Adj-P<0.01)
ENSG00000247092.6_SNHG10	SNHG10	0.470764	1.37875	5.45166	1.51419e-07	2.10884e-06	Significantly downregulated (Adj-P<0.01)
ENSG00000138442.9_WDR12	WDR12	-0.297914	4.08176	-5.50461	1.16895e-07	1.67806e-06	Significantly downregulated (Adj-P<0.01)
ENSG00000111300.9_NAA25	NAA25	0.358306	4.86741	5.50728	1.15369e-07	1.66368e-06	Significantly downregulated (Adj-P<0.01)
ENSG00000066735.14_KIF26A	KIF26A	-0.618607	2.53723	-5.47987	1.31944e-07	1.86709e-06	Significantly downregulated (Adj-P<0.01)
ENSG00000233554.5_B4GALT1-AS1	B4GALT1-AS1	-0.97064	-1.51976	-5.49123	1.24815e-07	1.77889e-06	Significantly downregulated (Adj-P<0.01)
ENSG00000228794.8_LINC01128	LINC01128	-0.534578	5.83432	-5.50462	1.16887e-07	1.67806e-06	Significantly downregulated (Adj-P<0.01)
ENSG00000187678.9_SPRY4	SPRY4	-0.623057	2.0867	-5.46046	1.45064e-07	2.03282e-06	Significantly downregulated (Adj-P<0.01)
ENSG00000260618.1_AC025917.1	AC025917.1	1.21815	-0.428937	5.49979	1.19685e-07	1.71347e-06	Significantly downregulated (Adj-P<0.01)
ENSG00000188687.17_SLC4A5	SLC4A5	0.591261	1.12638	5.43775	1.6203e-07	2.23894e-06	Significantly downregulated (Adj-P<0.01)
ENSG00000163166.14_IWS1	IWS1	-0.228353	4.82449	-5.50133	1.18785e-07	1.70366e-06	Significantly downregulated (Adj-P<0.01)
ENSG00000181924.6_COA4	COA4	-0.309186	3.91586	-5.49553	1.22214e-07	1.74809e-06	Significantly downregulated (Adj-P<0.01)
ENSG00000108001.13_EBF3	EBF3	-0.42087	2.80055	-5.47105	1.3776e-07	1.94246e-06	Significantly downregulated (Adj-P<0.01)
ENSG00000243970.3_PPIEL	PPIEL	0.552906	2.54771	5.45945	1.45783e-07	2.04109e-06	Significantly downregulated (Adj-P<0.01)
ENSG00000139433.9_GLTP	GLTP	-0.298615	3.24816	-5.47677	1.33958e-07	1.8939e-06	Significantly downregulated (Adj-P<0.01)
ENSG00000100503.23_NIN	NIN	0.573275	4.55431	5.4855	1.28363e-07	1.82292e-06	Significantly downregulated (Adj-P<0.01)
ENSG00000113721.13_PDGFRB	PDGFRB	-0.499912	5.19104	-5.49318	1.23625e-07	1.7651e-06	Significantly downregulated (Adj-P<0.01)
ENSG00000196159.11_FAT4	FAT4	0.59642	2.78801	5.45192	1.51232e-07	2.10857e-06	Significantly downregulated (Adj-P<0.01)
ENSG00000005483.20_KMT2E	KMT2E	0.388702	4.99487	5.48789	1.2687e-07	1.80494e-06	Significantly downregulated (Adj-P<0.01)
ENSG00000143158.10_MPC2	MPC2	-0.319471	6.39262	-5.48807	1.26758e-07	1.80494e-06	Significantly downregulated (Adj-P<0.01)
ENSG00000278540.4_ACACA	ACACA	0.376223	4.0231	5.47605	1.3443e-07	1.89888e-06	Significantly downregulated (Adj-P<0.01)
ENSG00000281344.1_HELLPAR	HELLPAR	1.60507	0.308607	5.47058	1.38072e-07	1.94513e-06	Significantly downregulated (Adj-P<0.01)
ENSG00000125633.10_CCDC93	CCDC93	0.280149	4.68219	5.48161	1.30827e-07	1.85459e-06	Significantly downregulated (Adj-P<0.01)
ENSG00000170264.12_FAM161A	FAM161A	0.697469	1.49241	5.41798	1.78366e-07	2.43711e-06	Significantly downregulated (Adj-P<0.01)
ENSG00000272789.1_AC010976.2	AC010976.2	-0.904757	-0.0698448	-5.41733	1.78931e-07	2.44272e-06	Significantly downregulated (Adj-P<0.01)
ENSG00000203965.12_EFCAB7	EFCAB7	0.985683	1.50639	5.4153	1.80695e-07	2.46046e-06	Significantly downregulated (Adj-P<0.01)
ENSG00000008869.11_HEATR5B	HEATR5B	0.401002	3.27588	5.45067	1.52152e-07	2.11719e-06	Significantly downregulated (Adj-P<0.01)
ENSG00000001497.16_LAS1L	LAS1L	0.261408	3.97631	5.46977	1.38619e-07	1.94938e-06	Significantly downregulated (Adj-P<0.01)
ENSG00000198482.11_ZNF808	ZNF808	-0.482465	2.84873	-5.44706	1.54852e-07	2.151e-06	Significantly downregulated (Adj-P<0.01)
ENSG00000071243.15_ING3	ING3	0.407592	2.5863	5.42775	1.70106e-07	2.3363e-06	Significantly downregulated (Adj-P<0.01)
ENSG00000133794.17_ARNTL	ARNTL	0.904408	1.75205	5.40967	1.85698e-07	2.5135e-06	Significantly downregulated (Adj-P<0.01)
ENSG00000206422.2_LRRC30	LRRC30	0.691825	1.72146	5.41165	1.83924e-07	2.49587e-06	Significantly downregulated (Adj-P<0.01)
ENSG00000214827.9_MTCP1	MTCP1	-0.715823	0.785311	-5.40629	1.88766e-07	2.5485e-06	Significantly downregulated (Adj-P<0.01)
ENSG00000279500.1_AC108704.2	AC108704.2	1.11355	-0.992774	5.50577	1.16231e-07	1.67335e-06	Significantly downregulated (Adj-P<0.01)
ENSG00000130734.9_ATG4D	ATG4D	-0.364808	4.99612	-5.46928	1.38954e-07	1.94975e-06	Significantly downregulated (Adj-P<0.01)
ENSG00000169372.12_CRADD	CRADD	-0.349404	3.15427	-5.44978	1.52818e-07	2.12459e-06	Significantly downregulated (Adj-P<0.01)
ENSG00000225830.12_ERCC6	ERCC6	0.404091	3.03831	5.43249	1.66225e-07	2.29094e-06	Significantly downregulated (Adj-P<0.01)
ENSG00000057019.15_DCBLD2	DCBLD2	0.391018	3.43041	5.43569	1.63659e-07	2.2595e-06	Significantly downregulated (Adj-P<0.01)
ENSG00000175600.15_SUGCT	SUGCT	-0.407388	2.1916	-5.42021	1.76442e-07	2.41289e-06	Significantly downregulated (Adj-P<0.01)
ENSG00000164494.11_PDSS2	PDSS2	-0.365477	3.31481	-5.44003	1.60246e-07	2.21816e-06	Significantly downregulated (Adj-P<0.01)
ENSG00000127463.14_EMC1	EMC1	0.248349	5.00544	5.45383	1.49832e-07	2.09225e-06	Significantly downregulated (Adj-P<0.01)
ENSG00000139218.17_SCAF11	SCAF11	0.327724	6.00087	5.45419	1.4957e-07	2.09043e-06	Significantly downregulated (Adj-P<0.01)
ENSG00000179918.18_SEPHS2	SEPHS2	-0.283161	4.58858	-5.45187	1.51267e-07	2.10857e-06	Significantly downregulated (Adj-P<0.01)
ENSG00000185274.11_GALNT17	GALNT17	2.08712	0.31711	5.43855	1.61403e-07	2.23223e-06	Significantly downregulated (Adj-P<0.01)
ENSG00000096968.13_JAK2	JAK2	0.623791	4.77809	5.44376	1.57363e-07	2.18396e-06	Significantly downregulated (Adj-P<0.01)
ENSG00000253873.5_PCDHGA11	PCDHGA11	1.08593	-0.111025	5.41203	1.83589e-07	2.49346e-06	Significantly downregulated (Adj-P<0.01)
ENSG00000105875.13_WDR91	WDR91	0.34635	2.91028	5.41705	1.7917e-07	2.44389e-06	Significantly downregulated (Adj-P<0.01)
ENSG00000285793.1_AC125232.2	AC125232.2	0.546138	2.64293	5.40889	1.86401e-07	2.52086e-06	Significantly downregulated (Adj-P<0.01)
ENSG00000168275.14_COA6	COA6	-0.380874	4.01587	-5.44245	1.58367e-07	2.19598e-06	Significantly downregulated (Adj-P<0.01)
ENSG00000152926.14_ZNF117	ZNF117	1.17927	2.45045	5.38573	2.08513e-07	2.79608e-06	Significantly downregulated (Adj-P<0.01)
ENSG00000120798.16_NR2C1	NR2C1	0.356363	4.78873	5.44173	1.58928e-07	2.20183e-06	Significantly downregulated (Adj-P<0.01)
ENSG00000204177.10_BMS1P1	BMS1P1	0.698378	1.81688	5.38069	2.13652e-07	2.84815e-06	Significantly downregulated (Adj-P<0.01)
ENSG00000170558.8_CDH2	CDH2	2.11392	-1.72005	5.69824	4.4728e-08	7.27609e-07	Significantly downregulated (Adj-P<0.01)
ENSG00000115677.16_HDLBP	HDLBP	-0.236668	8.96813	-5.42306	1.74023e-07	2.38598e-06	Significantly downregulated (Adj-P<0.01)
ENSG00000092020.10_PPP2R3C	PPP2R3C	-0.291145	3.7121	-5.42741	1.70383e-07	2.3381e-06	Significantly downregulated (Adj-P<0.01)
ENSG00000175470.19_PPP2R2D	PPP2R2D	-0.294422	4.14985	-5.43178	1.66804e-07	2.29691e-06	Significantly downregulated (Adj-P<0.01)
ENSG00000135048.13_CEMIP2	CEMIP2	0.471273	3.18666	5.40208	1.92656e-07	2.59661e-06	Significantly downregulated (Adj-P<0.01)
ENSG00000082175.14_PGR	PGR	1.00672	0.698769	5.37145	2.23391e-07	2.95319e-06	Significantly downregulated (Adj-P<0.01)
ENSG00000188729.6_OSTN	OSTN	2.47259	-1.1704	5.59463	7.49919e-08	1.14437e-06	Significantly downregulated (Adj-P<0.01)
ENSG00000113269.13_RNF130	RNF130	-0.32097	4.79298	-5.43124	1.67238e-07	2.3009e-06	Significantly downregulated (Adj-P<0.01)
ENSG00000126226.21_PCID2	PCID2	0.243818	4.23778	5.42193	1.74977e-07	2.39699e-06	Significantly downregulated (Adj-P<0.01)
ENSG00000171456.18_ASXL1	ASXL1	0.382156	5.6828	5.42898	1.69084e-07	2.32428e-06	Significantly downregulated (Adj-P<0.01)
ENSG00000132681.16_ATP1A4	ATP1A4	0.789404	0.807431	5.35904	2.37157e-07	3.12218e-06	Significantly downregulated (Adj-P<0.01)
ENSG00000073331.17_ALPK1	ALPK1	0.722758	1.27298	5.3551	2.41705e-07	3.16031e-06	Significantly downregulated (Adj-P<0.01)
ENSG00000220773.1_RPSAP44	RPSAP44	1.37434	-1.42467	5.5205	1.08123e-07	1.57204e-06	Significantly downregulated (Adj-P<0.01)
ENSG00000136478.7_TEX2	TEX2	-0.301619	5.87073	-5.42127	1.75537e-07	2.40258e-06	Significantly downregulated (Adj-P<0.01)
ENSG00000085382.11_HACE1	HACE1	0.419286	2.47122	5.37193	2.22878e-07	2.95132e-06	Significantly downregulated (Adj-P<0.01)
ENSG00000178922.16_HYI	HYI	0.475763	3.80825	5.40724	1.87901e-07	2.53899e-06	Significantly downregulated (Adj-P<0.01)
ENSG00000278445.1_AL137246.2	AL137246.2	-1.11985	3.7601	-5.41416	1.81704e-07	2.47208e-06	Significantly downregulated (Adj-P<0.01)
ENSG00000067082.14_KLF6	KLF6	0.502747	4.76325	5.41269	1.82997e-07	2.48753e-06	Significantly downregulated (Adj-P<0.01)
ENSG00000143995.19_MEIS1	MEIS1	0.503995	2.99857	5.38421	2.10041e-07	2.81419e-06	Significantly downregulated (Adj-P<0.01)
ENSG00000102743.14_SLC25A15	SLC25A15	-0.619135	1.20336	-5.356	2.40656e-07	3.14996e-06	Significantly downregulated (Adj-P<0.01)
ENSG00000111696.11_NT5DC3	NT5DC3	-0.459545	3.57276	-5.40089	1.93765e-07	2.60933e-06	Significantly downregulated (Adj-P<0.01)
ENSG00000167703.14_SLC43A2	SLC43A2	0.7251	4.47691	5.41054	1.84918e-07	2.50721e-06	Significantly downregulated (Adj-P<0.01)
ENSG00000114315.3_HES1	HES1	-0.821239	2.91319	-5.39361	2.00711e-07	2.69601e-06	Significantly downregulated (Adj-P<0.01)
ENSG00000171681.12_ATF7IP	ATF7IP	0.435809	5.55963	5.41614	1.79966e-07	2.45264e-06	Significantly downregulated (Adj-P<0.01)
ENSG00000162129.13_CLPB	CLPB	-0.328759	3.8226	-5.40349	1.91339e-07	2.58104e-06	Significantly downregulated (Adj-P<0.01)
ENSG00000171103.10_TRMT61B	TRMT61B	-0.356108	2.76292	-5.38096	2.13372e-07	2.84815e-06	Significantly downregulated (Adj-P<0.01)
ENSG00000233461.5_AL445524.1	AL445524.1	-0.783297	-1.01214	-5.36515	2.30283e-07	3.03924e-06	Significantly downregulated (Adj-P<0.01)
ENSG00000087995.15_METTL2A	METTL2A	-0.249831	3.01702	-5.3807	2.13633e-07	2.84815e-06	Significantly downregulated (Adj-P<0.01)
ENSG00000204310.12_AGPAT1	AGPAT1	-0.248916	5.34644	-5.41011	1.85307e-07	2.51034e-06	Significantly downregulated (Adj-P<0.01)
ENSG00000162664.16_ZNF326	ZNF326	0.352038	3.76619	5.39115	2.03116e-07	2.72601e-06	Significantly downregulated (Adj-P<0.01)
ENSG00000177551.5_NHLH2	NHLH2	3.36554	-2.24777	5.93757	1.32399e-08	2.5573e-07	Significantly downregulated (Adj-P<0.01)
ENSG00000097096.8_SYDE2	SYDE2	0.939341	0.335966	5.35484	2.42009e-07	3.16031e-06	Significantly downregulated (Adj-P<0.01)
ENSG00000120662.15_MTRF1	MTRF1	-0.3167	3.03491	-5.38194	2.12362e-07	2.8429e-06	Significantly downregulated (Adj-P<0.01)
ENSG00000198783.5_ZNF830	ZNF830	0.32823	2.701	5.36361	2.31997e-07	3.05932e-06	Significantly downregulated (Adj-P<0.01)
ENSG00000155903.11_RASA2	RASA2	0.509787	2.63544	5.3563	2.40307e-07	3.14799e-06	Significantly downregulated (Adj-P<0.01)
ENSG00000175984.14_DENND2C	DENND2C	0.651661	7.11553	5.39742	1.97049e-07	2.64906e-06	Significantly downregulated (Adj-P<0.01)
ENSG00000152439.12_ZNF773	ZNF773	0.442869	1.48656	5.33414	2.67324e-07	3.44785e-06	Significantly downregulated (Adj-P<0.01)
ENSG00000147010.17_SH3KBP1	SH3KBP1	-0.694635	3.30979	-5.37911	2.1528e-07	2.86265e-06	Significantly downregulated (Adj-P<0.01)
ENSG00000134255.13_CEPT1	CEPT1	0.384945	3.36667	5.36928	2.25743e-07	2.9818e-06	Significantly downregulated (Adj-P<0.01)
ENSG00000170074.19_FAM153A	FAM153A	1.80117	-1.12256	5.46919	1.39013e-07	1.94975e-06	Significantly downregulated (Adj-P<0.01)
ENSG00000146856.14_AGBL3	AGBL3	0.737977	0.734653	5.32544	2.78714e-07	3.57732e-06	Significantly downregulated (Adj-P<0.01)
ENSG00000135002.11_RFK	RFK	-0.356533	3.79996	-5.38073	2.13605e-07	2.84815e-06	Significantly downregulated (Adj-P<0.01)
ENSG00000168743.12_NPNT	NPNT	1.24551	2.31326	5.32638	2.77462e-07	3.56616e-06	Significantly downregulated (Adj-P<0.01)
ENSG00000163866.8_SMIM12	SMIM12	-0.339943	4.01404	-5.38007	2.14285e-07	2.8519e-06	Significantly downregulated (Adj-P<0.01)
ENSG00000166004.14_CEP295	CEP295	0.459387	2.39842	5.3294	2.73478e-07	3.51865e-06	Significantly downregulated (Adj-P<0.01)
ENSG00000138604.9_GLCE	GLCE	0.445542	2.74062	5.34004	2.59853e-07	3.36791e-06	Significantly downregulated (Adj-P<0.01)
ENSG00000142166.12_IFNAR1	IFNAR1	-0.31293	4.57464	-5.38101	2.13317e-07	2.84815e-06	Significantly downregulated (Adj-P<0.01)
ENSG00000180155.19_LYNX1	LYNX1	-0.621795	2.64475	-5.3548	2.42045e-07	3.16031e-06	Significantly downregulated (Adj-P<0.01)
ENSG00000091140.13_DLD	DLD	-0.35871	7.57929	-5.37346	2.21237e-07	2.93203e-06	Significantly downregulated (Adj-P<0.01)
ENSG00000150593.17_PDCD4	PDCD4	0.417799	3.51262	5.35735	2.39093e-07	3.13725e-06	Significantly downregulated (Adj-P<0.01)
ENSG00000134318.13_ROCK2	ROCK2	0.398435	6.50028	5.38007	2.14292e-07	2.8519e-06	Significantly downregulated (Adj-P<0.01)
ENSG00000117594.9_HSD11B1	HSD11B1	0.891911	0.151797	5.31821	2.88551e-07	3.67682e-06	Significantly downregulated (Adj-P<0.01)
ENSG00000162695.11_SLC30A7	SLC30A7	0.479704	2.14745	5.31915	2.87253e-07	3.6674e-06	Significantly downregulated (Adj-P<0.01)
ENSG00000166411.13_IDH3A	IDH3A	-0.384612	5.94495	-5.37679	2.17704e-07	2.89246e-06	Significantly downregulated (Adj-P<0.01)
ENSG00000116539.12_ASH1L	ASH1L	0.468543	6.03997	5.37594	2.18603e-07	2.90197e-06	Significantly downregulated (Adj-P<0.01)
ENSG00000175155.8_YPEL2	YPEL2	0.394464	5.46408	5.37513	2.19455e-07	2.91085e-06	Significantly downregulated (Adj-P<0.01)
ENSG00000178802.17_MPI	MPI	-0.262201	4.62609	-5.37146	2.23374e-07	2.95319e-06	Significantly downregulated (Adj-P<0.01)
ENSG00000183134.4_PTGDR2	PTGDR2	-0.826766	1.7544	-5.32054	2.85342e-07	3.64764e-06	Significantly downregulated (Adj-P<0.01)
ENSG00000141469.17_SLC14A1	SLC14A1	-0.672189	1.69482	-5.31359	2.94998e-07	3.74695e-06	Significantly downregulated (Adj-P<0.01)
ENSG00000111727.11_HCFC2	HCFC2	0.389094	4.21968	5.35124	2.46227e-07	3.21229e-06	Significantly downregulated (Adj-P<0.01)
ENSG00000072364.12_AFF4	AFF4	0.402547	5.48824	5.36015	2.35892e-07	3.10809e-06	Significantly downregulated (Adj-P<0.01)
ENSG00000008513.15_ST3GAL1	ST3GAL1	-0.430892	6.32229	-5.35745	2.38979e-07	3.13725e-06	Significantly downregulated (Adj-P<0.01)
ENSG00000246859.2_STARD4-AS1	STARD4-AS1	0.939687	3.08095	5.31588	2.91777e-07	3.71495e-06	Significantly downregulated (Adj-P<0.01)
ENSG00000107036.11_RIC1	RIC1	0.422816	4.08632	5.34514	2.53559e-07	3.2971e-06	Significantly downregulated (Adj-P<0.01)
ENSG00000108018.15_SORCS1	SORCS1	1.42453	-0.312393	5.34043	2.59369e-07	3.36438e-06	Significantly downregulated (Adj-P<0.01)
ENSG00000112308.12_C6orf62	C6orf62	0.238503	5.99055	5.35755	2.3887e-07	3.13725e-06	Significantly downregulated (Adj-P<0.01)
ENSG00000137124.7_ALDH1B1	ALDH1B1	-0.620542	5.52753	-5.35763	2.38776e-07	3.13725e-06	Significantly downregulated (Adj-P<0.01)
ENSG00000100568.10_VTI1B	VTI1B	-0.214701	5.8067	-5.35716	2.3932e-07	3.13764e-06	Significantly downregulated (Adj-P<0.01)
ENSG00000160753.15_RUSC1	RUSC1	-0.305721	3.06282	-5.33531	2.65819e-07	3.43384e-06	Significantly downregulated (Adj-P<0.01)
ENSG00000229320.3_KRT8P12	KRT8P12	-0.443485	2.17116	-5.30916	3.01318e-07	3.80894e-06	Significantly downregulated (Adj-P<0.01)
ENSG00000134363.11_FST	FST	1.61841	0.951718	5.28442	3.39136e-07	4.23787e-06	Significantly downregulated (Adj-P<0.01)
ENSG00000186001.13_LRCH3	LRCH3	0.220314	4.99646	5.35064	2.46943e-07	3.21898e-06	Significantly downregulated (Adj-P<0.01)
ENSG00000276231.4_PIK3R6	PIK3R6	-1.0167	-1.28458	-5.31201	2.97245e-07	3.76945e-06	Significantly downregulated (Adj-P<0.01)
ENSG00000135502.17_SLC26A10	SLC26A10	-0.698316	0.383894	-5.27991	3.46508e-07	4.32169e-06	Significantly downregulated (Adj-P<0.01)
ENSG00000198825.13_INPP5F	INPP5F	0.35022	2.58168	5.30118	3.13039e-07	3.94141e-06	Significantly downregulated (Adj-P<0.01)
ENSG00000214194.8_SMIM30	SMIM30	-0.302859	5.46018	-5.34742	2.50793e-07	3.26648e-06	Significantly downregulated (Adj-P<0.01)
ENSG00000109618.11_SEPSECS	SEPSECS	0.403477	2.9964	5.30823	3.02671e-07	3.823e-06	Significantly downregulated (Adj-P<0.01)
ENSG00000116350.16_SRSF4	SRSF4	0.228133	5.81997	5.34591	2.52632e-07	3.28774e-06	Significantly downregulated (Adj-P<0.01)
ENSG00000119401.10_TRIM32	TRIM32	0.332055	4.10637	5.33391	2.6762e-07	3.44887e-06	Significantly downregulated (Adj-P<0.01)
ENSG00000166136.15_NDUFB8	NDUFB8	-0.406915	6.4571	-5.33956	2.60456e-07	3.37297e-06	Significantly downregulated (Adj-P<0.01)
ENSG00000124615.19_MOCS1	MOCS1	-0.307444	4.43326	-5.34201	2.57413e-07	3.34447e-06	Significantly downregulated (Adj-P<0.01)
ENSG00000284526.1_AC015802.6	AC015802.6	-0.731936	0.15372	-5.27233	3.59238e-07	4.45777e-06	Significantly downregulated (Adj-P<0.01)
ENSG00000143322.19_ABL2	ABL2	0.351898	3.23818	5.31029	2.99693e-07	3.79443e-06	Significantly downregulated (Adj-P<0.01)
ENSG00000181038.13_METTL23	METTL23	-0.283375	2.82604	-5.31363	2.94943e-07	3.74695e-06	Significantly downregulated (Adj-P<0.01)
ENSG00000100105.17_PATZ1	PATZ1	0.334153	3.80689	5.32626	2.7762e-07	3.56616e-06	Significantly downregulated (Adj-P<0.01)
ENSG00000176182.5_MYPOP	MYPOP	-0.363338	3.15206	-5.32323	2.81689e-07	3.60967e-06	Significantly downregulated (Adj-P<0.01)
ENSG00000134871.18_COL4A2	COL4A2	-0.795562	5.85773	-5.33903	2.61122e-07	3.37883e-06	Significantly downregulated (Adj-P<0.01)
ENSG00000120318.15_ARAP3	ARAP3	-0.492211	3.27632	-5.31908	2.8735e-07	3.6674e-06	Significantly downregulated (Adj-P<0.01)
ENSG00000164172.18_MOCS2	MOCS2	-0.304993	5.29685	-5.33597	2.6498e-07	3.42597e-06	Significantly downregulated (Adj-P<0.01)
ENSG00000092439.14_TRPM7	TRPM7	0.411839	4.18687	5.32199	2.83367e-07	3.62532e-06	Significantly downregulated (Adj-P<0.01)
ENSG00000250317.8_SMIM20	SMIM20	-0.41379	4.45973	-5.33086	2.71566e-07	3.49688e-06	Significantly downregulated (Adj-P<0.01)
ENSG00000131148.8_EMC8	EMC8	-0.239972	3.28722	-5.30996	3.00171e-07	3.79746e-06	Significantly downregulated (Adj-P<0.01)
ENSG00000271816.1_BMS1P4	BMS1P4	0.803553	0.563376	5.25911	3.8256e-07	4.71211e-06	Significantly downregulated (Adj-P<0.01)
ENSG00000075399.13_VPS9D1	VPS9D1	-0.373329	3.03897	-5.30535	3.06864e-07	3.8698e-06	Significantly downregulated (Adj-P<0.01)
ENSG00000017797.12_RALBP1	RALBP1	-0.225885	5.67525	-5.32406	2.80562e-07	3.59813e-06	Significantly downregulated (Adj-P<0.01)
ENSG00000132313.14_MRPL35	MRPL35	-0.294077	5.47878	-5.3226	2.82532e-07	3.61755e-06	Significantly downregulated (Adj-P<0.01)
ENSG00000188677.14_PARVB	PARVB	-0.318402	7.04042	-5.31402	2.94392e-07	3.74524e-06	Significantly downregulated (Adj-P<0.01)
ENSG00000147586.9_MRPS28	MRPS28	-0.312083	4.78894	-5.31832	2.884e-07	3.67682e-06	Significantly downregulated (Adj-P<0.01)
ENSG00000214944.9_ARHGEF28	ARHGEF28	0.876215	-0.136159	5.27361	3.57054e-07	4.43927e-06	Significantly downregulated (Adj-P<0.01)
ENSG00000115840.13_SLC25A12	SLC25A12	-0.380221	7.50516	-5.30792	3.03118e-07	3.8256e-06	Significantly downregulated (Adj-P<0.01)
ENSG00000164663.14_USP49	USP49	0.389489	2.79674	5.27461	3.55361e-07	4.42515e-06	Significantly downregulated (Adj-P<0.01)
ENSG00000079385.21_CEACAM1	CEACAM1	-0.672063	0.436946	-5.24059	4.17728e-07	5.07158e-06	Significantly downregulated (Adj-P<0.01)
ENSG00000197969.12_VPS13A	VPS13A	0.417219	5.99162	5.31279	2.96136e-07	3.75839e-06	Significantly downregulated (Adj-P<0.01)
ENSG00000119906.12_SLF2	SLF2	0.38327	5.37005	5.31083	2.98922e-07	3.7877e-06	Significantly downregulated (Adj-P<0.01)
ENSG00000042062.11_RIPOR3	RIPOR3	-0.482116	2.96561	-5.28751	3.3416e-07	4.19073e-06	Significantly downregulated (Adj-P<0.01)
ENSG00000268592.3_RAET1E-AS1	RAET1E-AS1	1.06702	-0.214197	5.24797	4.03363e-07	4.9301e-06	Significantly downregulated (Adj-P<0.01)
ENSG00000260401.1_AP002761.4	AP002761.4	-0.45404	3.55872	-5.29565	3.21434e-07	4.04071e-06	Significantly downregulated (Adj-P<0.01)
ENSG00000124356.15_STAMBP	STAMBP	-0.244219	4.53379	-5.30378	3.09179e-07	3.8959e-06	Significantly downregulated (Adj-P<0.01)
ENSG00000183783.6_KCTD8	KCTD8	0.81226	0.255153	5.23938	4.20146e-07	5.08556e-06	Significantly downregulated (Adj-P<0.01)
ENSG00000141452.9_RMC1	RMC1	-0.343907	2.16058	-5.25438	3.9126e-07	4.81553e-06	Significantly downregulated (Adj-P<0.01)
ENSG00000126267.9_COX6B1	COX6B1	-0.460819	7.39967	-5.29008	3.30089e-07	4.14295e-06	Significantly downregulated (Adj-P<0.01)
ENSG00000117523.16_PRRC2C	PRRC2C	0.360396	5.84476	5.30048	3.14098e-07	3.95162e-06	Significantly downregulated (Adj-P<0.01)
ENSG00000144649.8_FAM198A	FAM198A	1.09893	-0.219528	5.24768	4.03921e-07	4.93311e-06	Significantly downregulated (Adj-P<0.01)
ENSG00000118260.14_CREB1	CREB1	0.355839	3.58969	5.27368	3.56947e-07	4.43927e-06	Significantly downregulated (Adj-P<0.01)
ENSG00000108622.10_ICAM2	ICAM2	-0.418112	2.68041	-5.26535	3.71381e-07	4.58508e-06	Significantly downregulated (Adj-P<0.01)
ENSG00000196557.12_CACNA1H	CACNA1H	-0.562399	2.53985	-5.26476	3.72426e-07	4.59441e-06	Significantly downregulated (Adj-P<0.01)
ENSG00000184619.5_KRBA2	KRBA2	-0.46537	2.79251	-5.26375	3.74225e-07	4.61303e-06	Significantly downregulated (Adj-P<0.01)
ENSG00000131115.15_ZNF227	ZNF227	0.355002	2.20727	5.23933	4.20247e-07	5.08556e-06	Significantly downregulated (Adj-P<0.01)
ENSG00000164151.11_ICE1	ICE1	0.330358	5.15971	5.29281	3.25815e-07	4.09254e-06	Significantly downregulated (Adj-P<0.01)
ENSG00000181827.14_RFX7	RFX7	0.493711	4.66967	5.28665	3.35539e-07	4.19847e-06	Significantly downregulated (Adj-P<0.01)
ENSG00000105877.17_DNAH11	DNAH11	3.82826	-1.93751	5.75944	3.28649e-08	5.53336e-07	Significantly downregulated (Adj-P<0.01)
ENSG00000205352.10_PRR13	PRR13	-0.376015	3.2292	-5.27225	3.59384e-07	4.45777e-06	Significantly downregulated (Adj-P<0.01)
ENSG00000079785.14_DDX1	DDX1	-0.195963	6.87736	-5.28361	3.40443e-07	4.24939e-06	Significantly downregulated (Adj-P<0.01)
ENSG00000092199.17_HNRNPC	HNRNPC	0.203418	6.78807	5.28434	3.39254e-07	4.23787e-06	Significantly downregulated (Adj-P<0.01)
ENSG00000011143.16_MKS1	MKS1	0.348775	2.46501	5.24354	4.11922e-07	5.0154e-06	Significantly downregulated (Adj-P<0.01)
ENSG00000173457.10_PPP1R14B	PPP1R14B	-0.615621	5.49916	-5.28663	3.35571e-07	4.19847e-06	Significantly downregulated (Adj-P<0.01)
ENSG00000285336.1_AC108734.4	AC108734.4	0.960649	2.32299	5.22552	4.4865e-07	5.38007e-06	Significantly downregulated (Adj-P<0.01)
ENSG00000232388.4_SMIM26	SMIM26	-0.314473	5.16371	-5.2871	3.34814e-07	4.19561e-06	Significantly downregulated (Adj-P<0.01)
ENSG00000258603.3_AC005225.2	AC005225.2	-0.635731	-0.0245221	-5.21038	4.81948e-07	5.73767e-06	Significantly downregulated (Adj-P<0.01)
ENSG00000205482.9_SPDYE18	SPDYE18	1.18852	-1.55276	5.3406	2.5916e-07	3.36438e-06	Significantly downregulated (Adj-P<0.01)
ENSG00000273486.1_AC096992.2	AC096992.2	-0.607887	0.775038	-5.20887	4.85403e-07	5.76421e-06	Significantly downregulated (Adj-P<0.01)
ENSG00000164062.12_APEH	APEH	-0.259184	6.22287	-5.27894	3.48101e-07	4.33815e-06	Significantly downregulated (Adj-P<0.01)
ENSG00000118292.8_C1orf54	C1orf54	-0.666145	0.544074	-5.20779	4.87881e-07	5.78498e-06	Significantly downregulated (Adj-P<0.01)
ENSG00000182054.9_IDH2	IDH2	-0.357301	9.45018	-5.25397	3.92022e-07	4.82117e-06	Significantly downregulated (Adj-P<0.01)
ENSG00000258311.5_BLOC1S1-RDH5	BLOC1S1-RDH5	-0.557908	3.8081	-5.27304	3.58039e-07	4.44803e-06	Significantly downregulated (Adj-P<0.01)
ENSG00000179041.3_RRS1	RRS1	-0.418947	3.619	-5.26744	3.67708e-07	4.5468e-06	Significantly downregulated (Adj-P<0.01)
ENSG00000164687.10_FABP5	FABP5	-0.483355	3.82424	-5.26866	3.65575e-07	4.52748e-06	Significantly downregulated (Adj-P<0.01)
ENSG00000100031.18_GGT1	GGT1	0.750103	0.402399	5.20385	4.9704e-07	5.8848e-06	Significantly downregulated (Adj-P<0.01)
ENSG00000236279.6_CLEC2L	CLEC2L	-1.0625	-1.08668	-5.21428	4.73144e-07	5.65245e-06	Significantly downregulated (Adj-P<0.01)
ENSG00000173409.13_ARV1	ARV1	-0.311179	2.98604	-5.24828	4.02775e-07	4.9267e-06	Significantly downregulated (Adj-P<0.01)
ENSG00000068912.13_ERLEC1	ERLEC1	-0.256598	4.54508	-5.26902	3.64954e-07	4.52332e-06	Significantly downregulated (Adj-P<0.01)
ENSG00000170854.17_RIOX2	RIOX2	-0.326519	4.59228	-5.26835	3.66114e-07	4.53063e-06	Significantly downregulated (Adj-P<0.01)
ENSG00000158296.13_SLC13A3	SLC13A3	0.896802	-0.176801	5.20181	5.01855e-07	5.93738e-06	Significantly downregulated (Adj-P<0.01)
ENSG00000198740.8_ZNF652	ZNF652	-0.334244	3.87828	-5.25152	3.9662e-07	4.86641e-06	Significantly downregulated (Adj-P<0.01)
ENSG00000001167.14_NFYA	NFYA	0.3622	2.99927	5.22477	4.50257e-07	5.39527e-06	Significantly downregulated (Adj-P<0.01)
ENSG00000174791.10_RIN1	RIN1	0.966446	1.74738	5.19436	5.19798e-07	6.11774e-06	Significantly downregulated (Adj-P<0.01)
ENSG00000130830.14_MPP1	MPP1	-0.284684	3.99589	-5.25161	3.96441e-07	4.86641e-06	Significantly downregulated (Adj-P<0.01)
ENSG00000023839.11_ABCC2	ABCC2	0.931566	0.742131	5.18341	5.47295e-07	6.41284e-06	Significantly downregulated (Adj-P<0.01)
ENSG00000091482.6_SMPX	SMPX	-0.501022	8.08944	-5.24364	4.1174e-07	5.0154e-06	Significantly downregulated (Adj-P<0.01)
ENSG00000100987.14_VSX1	VSX1	1.91021	-1.96305	5.43438	1.6471e-07	2.27202e-06	Significantly downregulated (Adj-P<0.01)
ENSG00000103978.15_TMEM87A	TMEM87A	0.230837	3.83132	5.24025	4.18402e-07	5.07484e-06	Significantly downregulated (Adj-P<0.01)
ENSG00000197467.14_COL13A1	COL13A1	0.986274	0.170415	5.18699	5.38159e-07	6.32446e-06	Significantly downregulated (Adj-P<0.01)
ENSG00000100347.14_SAMM50	SAMM50	-0.323704	6.61698	-5.25216	3.95409e-07	4.85907e-06	Significantly downregulated (Adj-P<0.01)
ENSG00000242612.6_DECR2	DECR2	0.34317	4.46495	5.24721	4.04817e-07	4.94027e-06	Significantly downregulated (Adj-P<0.01)
ENSG00000162747.10_FCGR3B	FCGR3B	-2.53709	-2.08484	-5.24923	4.00951e-07	4.90923e-06	Significantly downregulated (Adj-P<0.01)
ENSG00000196312.13_MFSD14C	MFSD14C	0.28981	3.83764	5.23431	4.30349e-07	5.18805e-06	Significantly downregulated (Adj-P<0.01)
ENSG00000025293.16_PHF20	PHF20	0.285601	5.80113	5.2497	4.00058e-07	4.9048e-06	Significantly downregulated (Adj-P<0.01)
ENSG00000089063.14_TMEM230	TMEM230	-0.21562	5.52921	-5.24919	4.01038e-07	4.90923e-06	Significantly downregulated (Adj-P<0.01)
ENSG00000169914.5_OTUD3	OTUD3	0.293092	3.69467	5.22759	4.44273e-07	5.33564e-06	Significantly downregulated (Adj-P<0.01)
ENSG00000085511.19_MAP3K4	MAP3K4	0.269277	4.35894	5.23894	4.21017e-07	5.09101e-06	Significantly downregulated (Adj-P<0.01)
ENSG00000054282.15_SDCCAG8	SDCCAG8	0.250555	3.25988	5.21661	4.6797e-07	5.59485e-06	Significantly downregulated (Adj-P<0.01)
ENSG00000138738.10_PRDM5	PRDM5	0.581224	1.48462	5.17163	5.78484e-07	6.72864e-06	Significantly downregulated (Adj-P<0.01)
ENSG00000247556.6_OIP5-AS1	OIP5-AS1	-0.325264	8.12874	-5.23179	4.35531e-07	5.24543e-06	Significantly downregulated (Adj-P<0.01)
ENSG00000144791.9_LIMD1	LIMD1	0.401067	4.98742	5.24055	4.17814e-07	5.07158e-06	Significantly downregulated (Adj-P<0.01)
ENSG00000116898.11_MRPS15	MRPS15	-0.307496	6.20064	-5.23947	4.19955e-07	5.08556e-06	Significantly downregulated (Adj-P<0.01)
ENSG00000136986.9_DERL1	DERL1	0.459333	5.42681	5.24183	4.15278e-07	5.05239e-06	Significantly downregulated (Adj-P<0.01)
ENSG00000173480.10_ZNF417	ZNF417	0.423847	2.23298	5.18365	5.46682e-07	6.4104e-06	Significantly downregulated (Adj-P<0.01)
ENSG00000176946.11_THAP4	THAP4	-0.300652	5.40902	-5.24087	4.17186e-07	5.07158e-06	Significantly downregulated (Adj-P<0.01)
ENSG00000184752.12_NDUFA12	NDUFA12	-0.366426	6.17374	-5.2386	4.21697e-07	5.09534e-06	Significantly downregulated (Adj-P<0.01)
ENSG00000176563.9_CNTD1	CNTD1	-0.711488	-0.48591	-5.16819	5.87904e-07	6.80994e-06	Significantly downregulated (Adj-P<0.01)
ENSG00000102897.9_LYRM1	LYRM1	-0.239026	4.05096	-5.23167	4.3577e-07	5.24543e-06	Significantly downregulated (Adj-P<0.01)
ENSG00000104332.11_SFRP1	SFRP1	1.48779	0.947971	5.16436	5.98585e-07	6.90678e-06	Significantly downregulated (Adj-P<0.01)
ENSG00000021300.13_PLEKHB1	PLEKHB1	-0.558665	2.31911	-5.19745	5.12273e-07	6.03813e-06	Significantly downregulated (Adj-P<0.01)
ENSG00000214029.4_ZNF891	ZNF891	0.447991	2.07782	5.17853	5.60008e-07	6.54455e-06	Significantly downregulated (Adj-P<0.01)
ENSG00000229659.1_RPL26P6	RPL26P6	-0.648135	1.57892	-5.17847	5.60184e-07	6.54455e-06	Significantly downregulated (Adj-P<0.01)
ENSG00000006757.11_PNPLA4	PNPLA4	-0.260932	4.75351	-5.23436	4.30265e-07	5.18805e-06	Significantly downregulated (Adj-P<0.01)
ENSG00000170629.14_DPY19L2P2	DPY19L2P2	0.936932	0.069922	5.17203	5.77403e-07	6.72099e-06	Significantly downregulated (Adj-P<0.01)
ENSG00000241127.7_YAE1	YAE1	-0.372857	1.55801	-5.17056	5.81396e-07	6.7532e-06	Significantly downregulated (Adj-P<0.01)
ENSG00000100243.20_CYB5R3	CYB5R3	0.308395	6.25068	5.22824	4.4292e-07	5.32342e-06	Significantly downregulated (Adj-P<0.01)
ENSG00000272894.5_AC004982.2	AC004982.2	0.65334	0.797741	5.15315	6.30898e-07	7.22711e-06	Significantly downregulated (Adj-P<0.01)
ENSG00000057704.12_TMCC3	TMCC3	0.429043	3.97556	5.21215	4.77945e-07	5.70551e-06	Significantly downregulated (Adj-P<0.01)
ENSG00000124523.15_SIRT5	SIRT5	-0.388839	5.16343	-5.22899	4.41348e-07	5.30854e-06	Significantly downregulated (Adj-P<0.01)
ENSG00000136450.12_SRSF1	SRSF1	0.2516	5.81784	5.22599	4.47655e-07	5.3722e-06	Significantly downregulated (Adj-P<0.01)
ENSG00000135903.19_PAX3	PAX3	0.7204	1.7446	5.15841	6.15528e-07	7.07607e-06	Significantly downregulated (Adj-P<0.01)
ENSG00000109458.8_GAB1	GAB1	0.653137	5.37584	5.21903	4.62642e-07	5.5395e-06	Significantly downregulated (Adj-P<0.01)
ENSG00000152117.17_AC073869.1	AC073869.1	0.485942	4.21929	5.21185	4.78615e-07	5.70922e-06	Significantly downregulated (Adj-P<0.01)
ENSG00000165138.17_ANKS6	ANKS6	0.288638	2.83235	5.18032	5.55328e-07	6.49813e-06	Significantly downregulated (Adj-P<0.01)
ENSG00000135720.12_DYNC1LI2	DYNC1LI2	0.32216	6.12192	5.21783	4.65279e-07	5.56687e-06	Significantly downregulated (Adj-P<0.01)
ENSG00000147535.16_PLPP5	PLPP5	0.496322	1.92435	5.15479	6.26065e-07	7.1821e-06	Significantly downregulated (Adj-P<0.01)
ENSG00000203883.6_SOX18	SOX18	-0.614268	3.21654	-5.19856	5.09598e-07	6.01106e-06	Significantly downregulated (Adj-P<0.01)
ENSG00000132953.16_XPO4	XPO4	0.893635	7.84942	5.20946	4.84037e-07	5.75229e-06	Significantly downregulated (Adj-P<0.01)
ENSG00000185245.7_GP1BA	GP1BA	-0.668393	1.23331	-5.15077	6.37969e-07	7.30284e-06	Significantly downregulated (Adj-P<0.01)
ENSG00000021776.10_AQR	AQR	0.33705	3.18619	5.18029	5.55392e-07	6.49813e-06	Significantly downregulated (Adj-P<0.01)
ENSG00000131375.9_CAPN7	CAPN7	0.392212	4.7447	5.20996	4.82913e-07	5.74323e-06	Significantly downregulated (Adj-P<0.01)
ENSG00000189367.14_KIAA0408	KIAA0408	0.512681	5.66879	5.2111	4.80302e-07	5.72504e-06	Significantly downregulated (Adj-P<0.01)
ENSG00000169609.13_C15orf40	C15orf40	0.352295	2.9189	5.17479	5.69957e-07	6.64894e-06	Significantly downregulated (Adj-P<0.01)
ENSG00000130312.6_MRPL34	MRPL34	-0.50396	5.45545	-5.20816	4.87019e-07	5.77908e-06	Significantly downregulated (Adj-P<0.01)
ENSG00000116001.15_TIA1	TIA1	0.280399	5.13132	5.20684	4.90078e-07	5.80669e-06	Significantly downregulated (Adj-P<0.01)
ENSG00000172650.13_AGAP5	AGAP5	0.413507	2.89636	5.17	5.8292e-07	6.76042e-06	Significantly downregulated (Adj-P<0.01)
ENSG00000105556.11_MIER2	MIER2	-0.389227	3.1921	-5.18481	5.43721e-07	6.3851e-06	Significantly downregulated (Adj-P<0.01)
ENSG00000155465.18_SLC7A7	SLC7A7	-1.00308	0.178539	-5.12466	7.20868e-07	8.0966e-06	Significantly downregulated (Adj-P<0.01)
ENSG00000177548.12_RABEP2	RABEP2	-0.412981	2.75515	-5.17415	5.71678e-07	6.66412e-06	Significantly downregulated (Adj-P<0.01)
ENSG00000153015.15_CWC27	CWC27	-0.23992	3.70747	-5.1841	5.45532e-07	6.40163e-06	Significantly downregulated (Adj-P<0.01)
ENSG00000188338.14_SLC38A3	SLC38A3	-0.587146	4.86069	-5.20058	5.04779e-07	5.96752e-06	Significantly downregulated (Adj-P<0.01)
ENSG00000163636.10_PSMD6	PSMD6	-0.175313	5.68504	-5.19947	5.07425e-07	5.99434e-06	Significantly downregulated (Adj-P<0.01)
ENSG00000162999.12_DUSP19	DUSP19	-0.513574	1.62114	-5.13581	6.84263e-07	7.7545e-06	Significantly downregulated (Adj-P<0.01)
ENSG00000196967.10_ZNF585A	ZNF585A	0.367691	2.52861	5.14856	6.44607e-07	7.3735e-06	Significantly downregulated (Adj-P<0.01)
ENSG00000247271.6_ZBED5-AS1	ZBED5-AS1	-0.444702	1.67343	-5.13877	6.74852e-07	7.66974e-06	Significantly downregulated (Adj-P<0.01)
ENSG00000182372.9_CLN8	CLN8	-0.336883	3.88214	-5.18821	5.35084e-07	6.29298e-06	Significantly downregulated (Adj-P<0.01)
ENSG00000152990.13_ADGRA3	ADGRA3	0.39578	5.45066	5.19607	5.15625e-07	6.07313e-06	Significantly downregulated (Adj-P<0.01)
ENSG00000064205.10_WISP2	WISP2	1.0007	3.35923	5.16438	5.98538e-07	6.90678e-06	Significantly downregulated (Adj-P<0.01)
ENSG00000115504.14_EHBP1	EHBP1	0.337861	3.59491	5.17054	5.81446e-07	6.7532e-06	Significantly downregulated (Adj-P<0.01)
ENSG00000104447.12_TRPS1	TRPS1	0.46844	2.6259	5.14329	6.60738e-07	7.5363e-06	Significantly downregulated (Adj-P<0.01)
ENSG00000272994.1_AC012360.3	AC012360.3	0.519197	0.644979	5.1156	7.52011e-07	8.34943e-06	Significantly downregulated (Adj-P<0.01)
ENSG00000130988.12_RGN	RGN	-0.443548	2.52603	-5.15652	6.21019e-07	7.12937e-06	Significantly downregulated (Adj-P<0.01)
ENSG00000134709.10_HOOK1	HOOK1	1.84354	-1.58951	5.33516	2.66021e-07	3.43384e-06	Significantly downregulated (Adj-P<0.01)
ENSG00000142252.10_GEMIN7	GEMIN7	-0.332244	2.70635	-5.15829	6.15886e-07	7.07607e-06	Significantly downregulated (Adj-P<0.01)
ENSG00000272884.1_AC113189.4	AC113189.4	-0.957882	0.415368	-5.11721	7.46386e-07	8.32189e-06	Significantly downregulated (Adj-P<0.01)
ENSG00000167553.15_TUBA1C	TUBA1C	-0.766454	2.15759	-5.14063	6.69007e-07	7.61421e-06	Significantly downregulated (Adj-P<0.01)
ENSG00000109971.13_HSPA8	HSPA8	-0.337575	9.6081	-5.15827	6.1593e-07	7.07607e-06	Significantly downregulated (Adj-P<0.01)
ENSG00000172985.10_SH3RF3	SH3RF3	-0.653355	3.28435	-5.16814	5.88047e-07	6.80994e-06	Significantly downregulated (Adj-P<0.01)
ENSG00000226306.6_NPY6R	NPY6R	-0.797786	3.66827	-5.1723	5.76675e-07	6.71744e-06	Significantly downregulated (Adj-P<0.01)
ENSG00000250673.2_REELD1	REELD1	1.53063	-1.68938	5.23803	4.22829e-07	5.10514e-06	Significantly downregulated (Adj-P<0.01)
ENSG00000175322.11_ZNF519	ZNF519	0.514871	2.16239	5.12177	7.30658e-07	8.17523e-06	Significantly downregulated (Adj-P<0.01)
ENSG00000154719.13_MRPL39	MRPL39	-0.261001	4.02491	-5.16702	5.91159e-07	6.83651e-06	Significantly downregulated (Adj-P<0.01)
ENSG00000147036.11_LANCL3	LANCL3	1.10538	-0.985295	5.17795	5.61539e-07	6.55555e-06	Significantly downregulated (Adj-P<0.01)
ENSG00000080298.15_RFX3	RFX3	0.689373	2.68547	5.11992	7.36989e-07	8.23447e-06	Significantly downregulated (Adj-P<0.01)
ENSG00000103549.21_RNF40	RNF40	-0.25417	4.1876	-5.16681	5.91734e-07	6.83768e-06	Significantly downregulated (Adj-P<0.01)
ENSG00000280614.1_FP236383.2	FP236383.2	-1.27974	10.2543	-5.12414	7.2261e-07	8.0966e-06	Significantly downregulated (Adj-P<0.01)
ENSG00000280800.1_FP671120.3	FP671120.3	-1.27974	10.2543	-5.12414	7.2261e-07	8.0966e-06	Significantly downregulated (Adj-P<0.01)
ENSG00000281181.1_FP236383.3	FP236383.3	-1.27974	10.2543	-5.12414	7.2261e-07	8.0966e-06	Significantly downregulated (Adj-P<0.01)
ENSG00000171634.17_BPTF	BPTF	0.400823	5.05407	5.167	5.91203e-07	6.83651e-06	Significantly downregulated (Adj-P<0.01)
ENSG00000203685.9_STUM	STUM	-0.499661	2.42323	-5.13265	6.94432e-07	7.85292e-06	Significantly downregulated (Adj-P<0.01)
ENSG00000204396.10_VWA7	VWA7	0.425746	3.37226	5.14559	6.5366e-07	7.4663e-06	Significantly downregulated (Adj-P<0.01)
ENSG00000108468.14_CBX1	CBX1	0.204375	5.52077	5.17011	5.82625e-07	6.76042e-06	Significantly downregulated (Adj-P<0.01)
ENSG00000162929.13_KIAA1841	KIAA1841	0.425564	2.54666	5.11602	7.50538e-07	8.34474e-06	Significantly downregulated (Adj-P<0.01)
ENSG00000124107.5_SLPI	SLPI	2.41592	-0.0232309	5.12702	7.12969e-07	8.03964e-06	Significantly downregulated (Adj-P<0.01)
ENSG00000168646.12_AXIN2	AXIN2	0.493088	3.65472	5.14382	6.59089e-07	7.5229e-06	Significantly downregulated (Adj-P<0.01)
ENSG00000136518.16_ACTL6A	ACTL6A	0.280115	2.97051	5.12835	7.08553e-07	7.99552e-06	Significantly downregulated (Adj-P<0.01)
ENSG00000106692.14_FKTN	FKTN	0.359467	3.4346	5.13538	6.8563e-07	7.76444e-06	Significantly downregulated (Adj-P<0.01)
ENSG00000159399.9_HK2	HK2	-1.53307	4.90029	-5.16075	6.08815e-07	7.01462e-06	Significantly downregulated (Adj-P<0.01)
ENSG00000152332.15_UHMK1	UHMK1	0.413454	5.57089	5.16102	6.0803e-07	7.01067e-06	Significantly downregulated (Adj-P<0.01)
ENSG00000105647.16_PIK3R2	PIK3R2	0.417303	4.3876	5.15392	6.28619e-07	7.2062e-06	Significantly downregulated (Adj-P<0.01)
ENSG00000114423.20_CBLB	CBLB	0.462161	2.87788	5.11615	7.50072e-07	8.34474e-06	Significantly downregulated (Adj-P<0.01)
ENSG00000189227.5_C15orf61	C15orf61	-0.357745	4.73355	-5.16014	6.1056e-07	7.02963e-06	Significantly downregulated (Adj-P<0.01)
ENSG00000196371.3_FUT4	FUT4	0.486333	0.791731	5.07993	8.87754e-07	9.64741e-06	Significantly downregulated (Adj-P<0.01)
ENSG00000274750.2_HIST1H3E	HIST1H3E	-1.17017	0.985233	-5.09254	8.37225e-07	9.161e-06	Significantly downregulated (Adj-P<0.01)
ENSG00000090621.13_PABPC4	PABPC4	-0.276426	8.48234	-5.14227	6.63892e-07	7.56685e-06	Significantly downregulated (Adj-P<0.01)
ENSG00000012211.12_PRICKLE3	PRICKLE3	-0.373338	2.78198	-5.12609	7.16056e-07	8.06299e-06	Significantly downregulated (Adj-P<0.01)
ENSG00000162972.10_MAIP1	MAIP1	-0.241689	3.20618	-5.13103	6.99738e-07	7.90729e-06	Significantly downregulated (Adj-P<0.01)
ENSG00000188897.9_AC099489.1	AC099489.1	1.29148	0.83918	5.06902	9.33823e-07	1.00586e-05	Significantly downregulated (Adj-P<0.01)
ENSG00000171246.5_NPTX1	NPTX1	3.06016	0.665787	5.09524	8.26789e-07	9.0593e-06	Significantly downregulated (Adj-P<0.01)
ENSG00000176853.15_FAM91A1	FAM91A1	0.400966	2.87886	5.10379	7.94533e-07	8.74813e-06	Significantly downregulated (Adj-P<0.01)
ENSG00000105364.13_MRPL4	MRPL4	-0.420759	4.81733	-5.14621	6.51754e-07	7.44989e-06	Significantly downregulated (Adj-P<0.01)
ENSG00000145979.17_TBC1D7	TBC1D7	-0.33456	2.34124	-5.09891	8.12805e-07	8.92456e-06	Significantly downregulated (Adj-P<0.01)
ENSG00000116260.16_QSOX1	QSOX1	-0.417343	4.38913	-5.14047	6.695e-07	7.61436e-06	Significantly downregulated (Adj-P<0.01)
ENSG00000172943.19_PHF8	PHF8	0.349124	3.82276	5.12611	7.15996e-07	8.06299e-06	Significantly downregulated (Adj-P<0.01)
ENSG00000129255.15_MPDU1	MPDU1	-0.359534	2.88994	-5.11567	7.51734e-07	8.34943e-06	Significantly downregulated (Adj-P<0.01)
ENSG00000114480.12_GBE1	GBE1	-0.434685	6.02323	-5.14076	6.68601e-07	7.61421e-06	Significantly downregulated (Adj-P<0.01)
ENSG00000107960.10_STN1	STN1	-0.282519	3.02951	-5.11452	7.55797e-07	8.38559e-06	Significantly downregulated (Adj-P<0.01)
ENSG00000144381.16_HSPD1	HSPD1	-0.276875	6.71605	-5.13478	6.87552e-07	7.78066e-06	Significantly downregulated (Adj-P<0.01)
ENSG00000108528.13_SLC25A11	SLC25A11	-0.40985	7.10772	-5.13048	7.01539e-07	7.92201e-06	Significantly downregulated (Adj-P<0.01)
ENSG00000112031.15_MTRF1L	MTRF1L	-0.326952	4.49347	-5.13623	6.82932e-07	7.75047e-06	Significantly downregulated (Adj-P<0.01)
ENSG00000164463.12_CREBRF	CREBRF	0.472066	3.74485	5.11121	7.67535e-07	8.49802e-06	Significantly downregulated (Adj-P<0.01)
ENSG00000221978.11_CCNL2	CCNL2	0.250135	6.39607	5.13607	6.8342e-07	7.75047e-06	Significantly downregulated (Adj-P<0.01)
ENSG00000196865.4_NHLRC2	NHLRC2	0.385395	5.23091	5.13735	6.79341e-07	7.71524e-06	Significantly downregulated (Adj-P<0.01)
ENSG00000127184.12_COX7C	COX7C	-0.513895	8.46669	-5.11665	7.48314e-07	8.33753e-06	Significantly downregulated (Adj-P<0.01)
ENSG00000198964.13_SGMS1	SGMS1	0.407336	3.43823	5.10694	7.82955e-07	8.64463e-06	Significantly downregulated (Adj-P<0.01)
ENSG00000175198.16_PCCA	PCCA	-0.290262	3.55557	-5.11753	7.45262e-07	8.31519e-06	Significantly downregulated (Adj-P<0.01)
ENSG00000153707.16_PTPRD	PTPRD	1.14614	1.13854	5.05098	1.01516e-06	1.07738e-05	Significantly downregulated (Adj-P<0.01)
ENSG00000189043.9_NDUFA4	NDUFA4	-0.399921	8.52818	-5.11212	7.64288e-07	8.4727e-06	Significantly downregulated (Adj-P<0.01)
ENSG00000133466.13_C1QTNF6	C1QTNF6	0.675595	1.41006	5.05751	9.84942e-07	1.05377e-05	Significantly downregulated (Adj-P<0.01)
ENSG00000117408.10_IPO13	IPO13	-0.225379	6.9671	-5.12438	7.2179e-07	8.0966e-06	Significantly downregulated (Adj-P<0.01)
ENSG00000100206.9_DMC1	DMC1	1.1437	-1.01	5.12363	7.24342e-07	8.11028e-06	Significantly downregulated (Adj-P<0.01)
ENSG00000226145.7_KRT16P6	KRT16P6	2.11109	-1.93128	5.24484	4.09404e-07	4.9924e-06	Significantly downregulated (Adj-P<0.01)
ENSG00000153902.13_LGI4	LGI4	0.463544	4.57251	5.12568	7.17441e-07	8.07287e-06	Significantly downregulated (Adj-P<0.01)
ENSG00000188739.14_RBM34	RBM34	-0.212808	3.75756	-5.112	7.64715e-07	8.4727e-06	Significantly downregulated (Adj-P<0.01)
ENSG00000205336.11_ADGRG1	ADGRG1	-0.439864	3.20817	-5.1057	7.8751e-07	8.68284e-06	Significantly downregulated (Adj-P<0.01)
ENSG00000005882.11_PDK2	PDK2	-0.349665	7.27899	-5.11622	7.49831e-07	8.34474e-06	Significantly downregulated (Adj-P<0.01)
ENSG00000161513.11_FDXR	FDXR	0.759315	1.7088	5.05661	9.89035e-07	1.05634e-05	Significantly downregulated (Adj-P<0.01)
ENSG00000105649.9_RAB3A	RAB3A	-0.541591	1.28081	-5.05837	9.81018e-07	1.05028e-05	Significantly downregulated (Adj-P<0.01)
ENSG00000143653.9_SCCPDH	SCCPDH	-0.195201	5.37051	-5.12496	7.19861e-07	8.09435e-06	Significantly downregulated (Adj-P<0.01)
ENSG00000149196.15_HIKESHI	HIKESHI	-0.230079	4.41382	-5.12045	7.35176e-07	8.22e-06	Significantly downregulated (Adj-P<0.01)
ENSG00000105835.11_NAMPT	NAMPT	-0.536878	6.13823	-5.11962	7.38029e-07	8.24029e-06	Significantly downregulated (Adj-P<0.01)
ENSG00000269930.1_AC091057.3	AC091057.3	-1.0079	0.140766	-5.03858	1.07499e-06	1.12955e-05	Significantly downregulated (Adj-P<0.01)
ENSG00000242419.5_PCDHGC4	PCDHGC4	1.06734	-0.0339381	5.05256	1.00778e-06	1.07242e-05	Significantly downregulated (Adj-P<0.01)
ENSG00000110171.19_TRIM3	TRIM3	-0.252251	3.39809	-5.10089	8.05346e-07	8.84878e-06	Significantly downregulated (Adj-P<0.01)
ENSG00000172215.5_CXCR6	CXCR6	1.29911	2.70463	5.06822	9.37275e-07	1.00889e-05	Significantly downregulated (Adj-P<0.01)
ENSG00000176142.12_TMEM39A	TMEM39A	0.259007	2.7051	5.0723	9.19728e-07	9.92988e-06	Significantly downregulated (Adj-P<0.01)
ENSG00000185158.12_LRRC37B	LRRC37B	0.496764	1.65802	5.04602	1.03869e-06	1.09723e-05	Significantly downregulated (Adj-P<0.01)
ENSG00000119927.13_GPAM	GPAM	0.640033	4.51066	5.10381	7.94457e-07	8.74813e-06	Significantly downregulated (Adj-P<0.01)
ENSG00000259495.2_AC016705.2	AC016705.2	0.819754	0.759977	5.03002	1.11827e-06	1.16731e-05	Significantly downregulated (Adj-P<0.01)
ENSG00000188177.13_ZC3H6	ZC3H6	0.470079	4.91772	5.1072	7.82025e-07	8.64036e-06	Significantly downregulated (Adj-P<0.01)
ENSG00000176595.3_KBTBD11	KBTBD11	-0.689817	1.15262	-5.04077	1.06416e-06	1.1204e-05	Significantly downregulated (Adj-P<0.01)
ENSG00000135900.3_MRPL44	MRPL44	-0.228919	4.58645	-5.1081	7.78754e-07	8.61622e-06	Significantly downregulated (Adj-P<0.01)
ENSG00000068796.16_KIF2A	KIF2A	0.502631	1.65737	5.03357	1.10013e-06	1.15216e-05	Significantly downregulated (Adj-P<0.01)
ENSG00000137449.15_CPEB2	CPEB2	0.527966	3.6559	5.08122	8.82449e-07	9.6161e-06	Significantly downregulated (Adj-P<0.01)
ENSG00000139173.9_TMEM117	TMEM117	-0.393098	1.55101	-5.0409	1.06353e-06	1.1204e-05	Significantly downregulated (Adj-P<0.01)
ENSG00000203667.9_COX20	COX20	-0.324314	5.28857	-5.10725	7.81837e-07	8.64036e-06	Significantly downregulated (Adj-P<0.01)
ENSG00000104695.12_PPP2CB	PPP2CB	-0.255581	5.58989	-5.10658	7.84295e-07	8.65341e-06	Significantly downregulated (Adj-P<0.01)
ENSG00000168769.13_TET2	TET2	0.468766	3.52476	5.07716	8.99217e-07	9.75196e-06	Significantly downregulated (Adj-P<0.01)
ENSG00000213445.9_SIPA1	SIPA1	-0.495002	2.78282	-5.07496	9.08448e-07	9.83863e-06	Significantly downregulated (Adj-P<0.01)
ENSG00000112378.11_PERP	PERP	0.999842	0.619431	5.02214	1.1596e-06	1.2057e-05	Significantly downregulated (Adj-P<0.01)
ENSG00000109381.19_ELF2	ELF2	0.291022	4.94706	5.10248	7.99404e-07	8.78957e-06	Significantly downregulated (Adj-P<0.01)
ENSG00000105135.15_ILVBL	ILVBL	-0.526579	3.31313	-5.08858	8.52791e-07	9.30568e-06	Significantly downregulated (Adj-P<0.01)
ENSG00000132768.13_DPH2	DPH2	-0.422295	4.13589	-5.09822	8.15403e-07	8.94071e-06	Significantly downregulated (Adj-P<0.01)
ENSG00000145990.10_GFOD1	GFOD1	-0.490389	4.95122	-5.10259	7.98989e-07	8.78957e-06	Significantly downregulated (Adj-P<0.01)
ENSG00000164398.12_ACSL6	ACSL6	0.673809	2.92511	5.0591	9.77718e-07	1.04745e-05	Significantly downregulated (Adj-P<0.01)
ENSG00000163961.4_RNF168	RNF168	-0.329845	4.22026	-5.09004	8.47034e-07	9.25558e-06	Significantly downregulated (Adj-P<0.01)
ENSG00000053501.12_USE1	USE1	-0.359619	3.34437	-5.08021	8.86593e-07	9.6414e-06	Significantly downregulated (Adj-P<0.01)
ENSG00000036448.9_MYOM2	MYOM2	0.427082	9.88143	5.07155	9.22921e-07	9.95463e-06	Significantly downregulated (Adj-P<0.01)
ENSG00000011007.12_ELOA	ELOA	-0.24198	5.21979	-5.09835	8.14939e-07	8.94071e-06	Significantly downregulated (Adj-P<0.01)
ENSG00000066382.16_MPPED2	MPPED2	0.853828	2.76213	5.04352	1.05075e-06	1.10849e-05	Significantly downregulated (Adj-P<0.01)
ENSG00000153006.15_SREK1IP1	SREK1IP1	0.322024	3.5229	5.06523	9.50355e-07	1.02158e-05	Significantly downregulated (Adj-P<0.01)
ENSG00000167792.12_NDUFV1	NDUFV1	-0.4035	7.98737	-5.08048	8.85484e-07	9.63593e-06	Significantly downregulated (Adj-P<0.01)
ENSG00000168724.16_DNAJC21	DNAJC21	-0.259463	6.05981	-5.09391	8.31915e-07	9.10919e-06	Significantly downregulated (Adj-P<0.01)
ENSG00000280433.1_FP565260.6	FP565260.6	-0.472208	2.38643	-5.04883	1.02526e-06	1.08521e-05	Significantly downregulated (Adj-P<0.01)
ENSG00000169019.10_COMMD8	COMMD8	-0.481114	1.95485	-5.03895	1.07313e-06	1.12835e-05	Significantly downregulated (Adj-P<0.01)
ENSG00000116221.15_MRPL37	MRPL37	-0.262873	6.23584	-5.0894	8.49543e-07	9.27661e-06	Significantly downregulated (Adj-P<0.01)
ENSG00000204149.10_AGAP6	AGAP6	0.315416	4.07601	5.0805	8.85417e-07	9.63593e-06	Significantly downregulated (Adj-P<0.01)
ENSG00000112715.21_VEGFA	VEGFA	-0.487333	7.37372	-5.07844	8.93927e-07	9.70121e-06	Significantly downregulated (Adj-P<0.01)
ENSG00000066032.18_CTNNA2	CTNNA2	2.10494	-1.93153	5.26576	3.7066e-07	4.57974e-06	Significantly downregulated (Adj-P<0.01)
ENSG00000090565.15_RAB11FIP3	RAB11FIP3	0.369289	5.46202	5.08752	8.57006e-07	9.34525e-06	Significantly downregulated (Adj-P<0.01)
ENSG00000238164.6_TNFRSF14-AS1	TNFRSF14-AS1	-0.58797	0.586218	-5.0097	1.22791e-06	1.27089e-05	Significantly downregulated (Adj-P<0.01)
ENSG00000259828.1_AL355596.1	AL355596.1	1.30099	1.48011	5.0027	1.26804e-06	1.30647e-05	Significantly downregulated (Adj-P<0.01)
ENSG00000171649.11_ZIK1	ZIK1	0.531499	0.980128	4.99948	1.28692e-06	1.32506e-05	Significantly downregulated (Adj-P<0.01)
ENSG00000106261.16_ZKSCAN1	ZKSCAN1	0.274751	5.012	5.07899	8.9162e-07	9.6828e-06	Significantly downregulated (Adj-P<0.01)
ENSG00000171476.21_HOPX	HOPX	0.419273	2.41568	5.03286	1.10373e-06	1.15441e-05	Significantly downregulated (Adj-P<0.01)
ENSG00000112305.14_SMAP1	SMAP1	-0.321708	4.55075	-5.07642	9.02335e-07	9.77909e-06	Significantly downregulated (Adj-P<0.01)
ENSG00000232926.1_AC000078.1	AC000078.1	0.753409	0.359677	4.99454	1.31641e-06	1.35104e-05	Significantly downregulated (Adj-P<0.01)
ENSG00000178752.15_ERFE	ERFE	1.35924	0.539449	4.9972	1.30044e-06	1.33725e-05	Significantly downregulated (Adj-P<0.01)
ENSG00000163531.15_NFASC	NFASC	-0.547928	3.0424	-5.05124	1.01394e-06	1.07709e-05	Significantly downregulated (Adj-P<0.01)
ENSG00000186448.14_ZNF197	ZNF197	0.296208	3.68631	5.05507	9.96119e-07	1.06143e-05	Significantly downregulated (Adj-P<0.01)
ENSG00000105976.14_MET	MET	0.457781	5.14902	5.07463	9.09853e-07	9.84129e-06	Significantly downregulated (Adj-P<0.01)
ENSG00000134153.9_EMC7	EMC7	-0.241582	4.50217	-5.07224	9.20001e-07	9.92988e-06	Significantly downregulated (Adj-P<0.01)
ENSG00000183631.4_PRR32	PRR32	3.18416	-2.98639	5.52756	1.04435e-07	1.52962e-06	Significantly downregulated (Adj-P<0.01)
ENSG00000184465.16_WDR27	WDR27	0.391137	2.89214	5.03688	1.08345e-06	1.13695e-05	Significantly downregulated (Adj-P<0.01)
ENSG00000120129.5_DUSP1	DUSP1	0.751286	5.62294	5.07461	9.09933e-07	9.84129e-06	Significantly downregulated (Adj-P<0.01)
ENSG00000144118.13_RALB	RALB	-0.352998	3.82399	-5.06175	9.65825e-07	1.03681e-05	Significantly downregulated (Adj-P<0.01)
ENSG00000163406.10_SLC15A2	SLC15A2	0.599652	0.508832	4.98962	1.34644e-06	1.38008e-05	Significantly downregulated (Adj-P<0.01)
ENSG00000108349.16_CASC3	CASC3	0.212677	6.0489	5.07233	9.19602e-07	9.92988e-06	Significantly downregulated (Adj-P<0.01)
ENSG00000011114.14_BTBD7	BTBD7	0.308104	4.31129	5.06148	9.67004e-07	1.03737e-05	Significantly downregulated (Adj-P<0.01)
ENSG00000184349.12_EFNA5	EFNA5	1.86899	-1.48715	5.19905	5.08433e-07	6.00178e-06	Significantly downregulated (Adj-P<0.01)
ENSG00000085377.13_PREP	PREP	-0.303347	6.04438	-5.07097	9.25403e-07	9.97462e-06	Significantly downregulated (Adj-P<0.01)
ENSG00000115875.18_SRSF7	SRSF7	0.239478	4.84559	5.06559	9.48762e-07	1.02056e-05	Significantly downregulated (Adj-P<0.01)
ENSG00000179456.10_ZBTB18	ZBTB18	-0.330481	6.5486	-5.06294	9.60486e-07	1.03178e-05	Significantly downregulated (Adj-P<0.01)
ENSG00000101654.17_RNMT	RNMT	0.288307	4.44674	5.05917	9.77429e-07	1.04745e-05	Significantly downregulated (Adj-P<0.01)
ENSG00000085465.12_OVGP1	OVGP1	0.575172	0.359123	4.97807	1.4196e-06	1.4402e-05	Significantly downregulated (Adj-P<0.01)
ENSG00000138764.14_CCNG2	CCNG2	0.668762	3.44086	5.02829	1.12724e-06	1.17513e-05	Significantly downregulated (Adj-P<0.01)
ENSG00000138399.17_FASTKD1	FASTKD1	-0.526029	3.75675	-5.04915	1.02375e-06	1.08433e-05	Significantly downregulated (Adj-P<0.01)
ENSG00000135974.9_C2orf49	C2orf49	0.32891	3.96104	5.04552	1.04109e-06	1.09903e-05	Significantly downregulated (Adj-P<0.01)
ENSG00000261740.6_BOLA2-SMG1P6	BOLA2-SMG1P6	-0.592512	2.34477	-5.01903	1.17634e-06	1.2223e-05	Significantly downregulated (Adj-P<0.01)
ENSG00000112320.11_SOBP	SOBP	-0.339152	4.58588	-5.05665	9.88869e-07	1.05634e-05	Significantly downregulated (Adj-P<0.01)
ENSG00000184182.18_UBE2F	UBE2F	-0.228966	4.52625	-5.05632	9.90364e-07	1.05672e-05	Significantly downregulated (Adj-P<0.01)
ENSG00000129933.20_MAU2	MAU2	0.25424	6.51966	5.05437	9.99338e-07	1.06415e-05	Significantly downregulated (Adj-P<0.01)
ENSG00000162377.5_COA7	COA7	-0.322021	4.24654	-5.05118	1.01421e-06	1.07709e-05	Significantly downregulated (Adj-P<0.01)
ENSG00000136950.13_ARPC5L	ARPC5L	-0.313825	4.73026	-5.05603	9.91735e-07	1.05747e-05	Significantly downregulated (Adj-P<0.01)
ENSG00000113643.8_RARS	RARS	-0.213661	4.43503	-5.05131	1.01361e-06	1.07709e-05	Significantly downregulated (Adj-P<0.01)
ENSG00000164077.14_MON1A	MON1A	-0.337823	2.83273	-5.02653	1.13639e-06	1.18389e-05	Significantly downregulated (Adj-P<0.01)
ENSG00000250978.5_AC079467.1	AC079467.1	1.38486	2.88739	4.99681	1.3028e-06	1.33881e-05	Significantly downregulated (Adj-P<0.01)
ENSG00000279762.3_AC005899.8	AC005899.8	0.922105	-0.544539	5.01279	1.21057e-06	1.25459e-05	Significantly downregulated (Adj-P<0.01)
ENSG00000203585.4_LINC02408	LINC02408	2.72482	-2.218	5.39853	1.95992e-07	2.63708e-06	Significantly downregulated (Adj-P<0.01)
ENSG00000185900.9_POMK	POMK	0.932442	0.0659416	4.97655	1.42951e-06	1.44839e-05	Significantly downregulated (Adj-P<0.01)
ENSG00000264112.1_AC015813.1	AC015813.1	0.508816	5.03644	5.05001	1.01969e-06	1.08147e-05	Significantly downregulated (Adj-P<0.01)
ENSG00000169241.18_SLC50A1	SLC50A1	-0.443817	1.0642	-4.97622	1.43165e-06	1.44963e-05	Significantly downregulated (Adj-P<0.01)
ENSG00000165121.11_AL353743.1	AL353743.1	0.453664	1.19963	4.96877	1.48126e-06	1.4932e-05	Significantly downregulated (Adj-P<0.01)
ENSG00000103852.12_TTC23	TTC23	0.424731	3.73386	5.03309	1.10258e-06	1.15396e-05	Significantly downregulated (Adj-P<0.01)
ENSG00000188807.12_TMEM201	TMEM201	-0.304979	5.16432	-5.04973	1.02102e-06	1.08216e-05	Significantly downregulated (Adj-P<0.01)
ENSG00000231607.10_DLEU2	DLEU2	0.582698	0.570355	4.96273	1.52269e-06	1.53011e-05	Significantly downregulated (Adj-P<0.01)
ENSG00000204120.14_GIGYF2	GIGYF2	0.260235	6.0234	5.04855	1.02662e-06	1.08592e-05	Significantly downregulated (Adj-P<0.01)
ENSG00000116199.11_FAM20B	FAM20B	-0.226232	5.22122	-5.04706	1.03369e-06	1.09267e-05	Significantly downregulated (Adj-P<0.01)
ENSG00000114023.15_FAM162A	FAM162A	-0.304142	5.49945	-5.04297	1.05341e-06	1.11055e-05	Significantly downregulated (Adj-P<0.01)
ENSG00000175548.8_ALG10B	ALG10B	0.525711	2.0404	4.97403	1.4461e-06	1.4624e-05	Significantly downregulated (Adj-P<0.01)
ENSG00000114738.10_MAPKAPK3	MAPKAPK3	-0.393509	6.67175	-5.03626	1.08654e-06	1.13943e-05	Significantly downregulated (Adj-P<0.01)
ENSG00000105339.10_DENND3	DENND3	-0.490177	3.0345	-5.01603	1.19267e-06	1.23765e-05	Significantly downregulated (Adj-P<0.01)
ENSG00000160194.17_NDUFV3	NDUFV3	-0.334764	6.01238	-5.03951	1.07038e-06	1.1262e-05	Significantly downregulated (Adj-P<0.01)
ENSG00000157045.8_NTAN1	NTAN1	-0.356443	3.58251	-5.02526	1.14305e-06	1.19005e-05	Significantly downregulated (Adj-P<0.01)
ENSG00000182903.15_ZNF721	ZNF721	0.334378	3.56035	5.01032	1.22443e-06	1.26812e-05	Significantly downregulated (Adj-P<0.01)
ENSG00000083099.10_LYRM2	LYRM2	-0.26109	4.83373	-5.03745	1.0806e-06	1.1347e-05	Significantly downregulated (Adj-P<0.01)
ENSG00000198453.12_ZNF568	ZNF568	0.607555	2.46888	4.9779	1.4207e-06	1.44039e-05	Significantly downregulated (Adj-P<0.01)
ENSG00000198700.9_IPO9	IPO9	0.213609	4.88943	5.03452	1.09529e-06	1.14785e-05	Significantly downregulated (Adj-P<0.01)
ENSG00000128513.14_POT1	POT1	0.332118	2.11601	4.97352	1.44943e-06	1.46483e-05	Significantly downregulated (Adj-P<0.01)
ENSG00000134452.19_FBH1	FBH1	-0.211781	4.55518	-5.0326	1.10507e-06	1.15505e-05	Significantly downregulated (Adj-P<0.01)
ENSG00000109180.14_OCIAD1	OCIAD1	-0.255202	6.26172	-5.03124	1.11201e-06	1.16153e-05	Significantly downregulated (Adj-P<0.01)
ENSG00000179981.10_TSHZ1	TSHZ1	0.449134	3.7178	5.0089	1.23242e-06	1.27473e-05	Significantly downregulated (Adj-P<0.01)
ENSG00000161940.10_BCL6B	BCL6B	-0.599139	2.27142	-4.98658	1.36532e-06	1.39582e-05	Significantly downregulated (Adj-P<0.01)
ENSG00000143819.12_EPHX1	EPHX1	-0.469457	4.99449	-5.02914	1.12281e-06	1.17128e-05	Significantly downregulated (Adj-P<0.01)
ENSG00000270175.1_AC023509.4	AC023509.4	-0.659567	0.173393	-4.94213	1.67263e-06	1.66393e-05	Significantly downregulated (Adj-P<0.01)
ENSG00000173275.12_ZNF449	ZNF449	0.432943	2.88454	4.985	1.37524e-06	1.40326e-05	Significantly downregulated (Adj-P<0.01)
ENSG00000115289.13_PCGF1	PCGF1	-0.330132	2.86926	-4.99347	1.32288e-06	1.3568e-05	Significantly downregulated (Adj-P<0.01)
ENSG00000246451.2_AL049840.1	AL049840.1	0.468368	1.96442	4.95646	1.5669e-06	1.56759e-05	Significantly downregulated (Adj-P<0.01)
ENSG00000138768.14_USO1	USO1	0.35654	8.21755	5.00831	1.23575e-06	1.27652e-05	Significantly downregulated (Adj-P<0.01)
ENSG00000031003.10_FAM13B	FAM13B	0.357879	3.14594	4.98329	1.38605e-06	1.41066e-05	Significantly downregulated (Adj-P<0.01)
ENSG00000253731.2_PCDHGA6	PCDHGA6	0.757571	0.405116	4.93332	1.74103e-06	1.72549e-05	Significantly downregulated (Adj-P<0.01)
ENSG00000113790.10_EHHADH	EHHADH	-0.815778	1.12777	-4.94337	1.66323e-06	1.65688e-05	Significantly downregulated (Adj-P<0.01)
ENSG00000102178.12_UBL4A	UBL4A	-0.277691	6.03902	-5.01406	1.20354e-06	1.24812e-05	Significantly downregulated (Adj-P<0.01)
ENSG00000089250.18_NOS1	NOS1	-0.572764	6.92558	-5.00404	1.26027e-06	1.2993e-05	Significantly downregulated (Adj-P<0.01)
ENSG00000113621.14_TXNDC15	TXNDC15	-0.205428	4.71874	-5.00848	1.23479e-06	1.27635e-05	Significantly downregulated (Adj-P<0.01)
ENSG00000259030.7_FPGT-TNNI3K	FPGT-TNNI3K	0.75092	1.06368	4.92394	1.81682e-06	1.79277e-05	Significantly downregulated (Adj-P<0.01)
ENSG00000176542.9_USF3	USF3	0.407518	5.48261	5.00535	1.25268e-06	1.29232e-05	Significantly downregulated (Adj-P<0.01)
ENSG00000130707.17_ASS1	ASS1	0.699167	4.38883	4.99607	1.30719e-06	1.34245e-05	Significantly downregulated (Adj-P<0.01)
ENSG00000147854.16_UHRF2	UHRF2	0.279385	4.06395	4.98842	1.35387e-06	1.3868e-05	Significantly downregulated (Adj-P<0.01)
ENSG00000147180.16_ZNF711	ZNF711	1.12212	1.4423	4.91396	1.90097e-06	1.86422e-05	Significantly downregulated (Adj-P<0.01)
ENSG00000221946.7_FXYD7	FXYD7	1.13603	-1.16192	4.93762	1.70735e-06	1.6974e-05	Significantly downregulated (Adj-P<0.01)
ENSG00000272501.1_AL662844.4	AL662844.4	0.573526	2.96323	4.9594	1.54604e-06	1.54867e-05	Significantly downregulated (Adj-P<0.01)
ENSG00000156261.12_CCT8	CCT8	-0.208888	6.17778	-4.99729	1.29989e-06	1.33725e-05	Significantly downregulated (Adj-P<0.01)
ENSG00000278616.1_BEND3P3	BEND3P3	0.759019	0.569302	4.9102	1.93368e-06	1.89162e-05	Significantly downregulated (Adj-P<0.01)
ENSG00000164405.10_UQCRQ	UQCRQ	-0.501932	7.27451	-4.98389	1.38226e-06	1.40861e-05	Significantly downregulated (Adj-P<0.01)
ENSG00000168970.22_JMJD7-PLA2G4B	JMJD7-PLA2G4B	0.415044	4.01362	4.98256	1.39074e-06	1.41453e-05	Significantly downregulated (Adj-P<0.01)
ENSG00000086848.14_ALG9	ALG9	0.257312	3.15267	4.96002	1.54165e-06	1.54525e-05	Significantly downregulated (Adj-P<0.01)
ENSG00000011405.13_PIK3C2A	PIK3C2A	0.457125	3.63876	4.96538	1.50436e-06	1.51361e-05	Significantly downregulated (Adj-P<0.01)
ENSG00000225032.5_AL162586.1	AL162586.1	-0.42701	1.55622	-4.92926	1.77344e-06	1.75214e-05	Significantly downregulated (Adj-P<0.01)
ENSG00000102908.20_NFAT5	NFAT5	0.589465	4.46212	4.97951	1.41027e-06	1.43255e-05	Significantly downregulated (Adj-P<0.01)
ENSG00000198887.8_SMC5	SMC5	0.401991	4.767	4.98529	1.37342e-06	1.4023e-05	Significantly downregulated (Adj-P<0.01)
ENSG00000134376.15_CRB1	CRB1	1.10696	-0.651491	4.94334	1.66346e-06	1.65688e-05	Significantly downregulated (Adj-P<0.01)
ENSG00000182831.11_C16orf72	C16orf72	-0.291129	6.299	-4.98824	1.35498e-06	1.38704e-05	Significantly downregulated (Adj-P<0.01)
ENSG00000279631.1_AL158211.5	AL158211.5	0.900546	-0.0533155	4.9119	1.91885e-06	1.87943e-05	Significantly downregulated (Adj-P<0.01)
ENSG00000137871.20_ZNF280D	ZNF280D	0.370397	4.80224	4.98474	1.37688e-06	1.40403e-05	Significantly downregulated (Adj-P<0.01)
ENSG00000175203.15_DCTN2	DCTN2	-0.166523	5.55422	-4.98788	1.35725e-06	1.38847e-05	Significantly downregulated (Adj-P<0.01)
ENSG00000106415.12_GLCCI1	GLCCI1	0.53356	2.11243	4.92033	1.8469e-06	1.81793e-05	Significantly downregulated (Adj-P<0.01)
ENSG00000162959.13_MEMO1	MEMO1	-0.33693	4.8286	-4.98592	1.36949e-06	1.39919e-05	Significantly downregulated (Adj-P<0.01)
ENSG00000182247.9_UBE2E2	UBE2E2	0.35254	2.39164	4.93184	1.75281e-06	1.73403e-05	Significantly downregulated (Adj-P<0.01)
ENSG00000132932.16_ATP8A2	ATP8A2	1.27725	-0.787015	4.94218	1.67229e-06	1.66393e-05	Significantly downregulated (Adj-P<0.01)
ENSG00000188404.8_SELL	SELL	-1.79176	-1.48682	-4.92987	1.76853e-06	1.74838e-05	Significantly downregulated (Adj-P<0.01)
ENSG00000088766.11_CRLS1	CRLS1	-0.237689	5.00013	-4.98058	1.40341e-06	1.4265e-05	Significantly downregulated (Adj-P<0.01)
ENSG00000112852.6_PCDHB2	PCDHB2	0.846958	-0.52789	4.92171	1.83532e-06	1.80947e-05	Significantly downregulated (Adj-P<0.01)
ENSG00000109920.12_FNBP4	FNBP4	0.436673	5.96515	4.97932	1.4115e-06	1.43289e-05	Significantly downregulated (Adj-P<0.01)
ENSG00000203799.12_CCDC162P	CCDC162P	0.780172	0.227143	4.89213	2.09849e-06	2.0373e-05	Significantly downregulated (Adj-P<0.01)
ENSG00000138758.11_SEPT11	2020-09-11	0.391389	3.64415	4.95088	1.60727e-06	1.60596e-05	Significantly downregulated (Adj-P<0.01)
ENSG00000198860.12_TSEN15	TSEN15	-0.217877	4.17942	-4.96939	1.47708e-06	1.48993e-05	Significantly downregulated (Adj-P<0.01)
ENSG00000165810.16_BTNL9	BTNL9	-0.632991	5.39891	-4.97522	1.43822e-06	1.45536e-05	Significantly downregulated (Adj-P<0.01)
ENSG00000090686.15_USP48	USP48	0.206121	4.7989	4.97027	1.47114e-06	1.48489e-05	Significantly downregulated (Adj-P<0.01)
ENSG00000141867.17_BRD4	BRD4	-0.224045	5.62952	-4.97242	1.45677e-06	1.47132e-05	Significantly downregulated (Adj-P<0.01)
ENSG00000258692.2_SALL4P7	SALL4P7	1.30801	-1.5996	5.00643	1.24651e-06	1.28679e-05	Significantly downregulated (Adj-P<0.01)
ENSG00000280088.1_AC126474.2	AC126474.2	-0.541265	0.389819	-4.88377	2.17921e-06	2.10203e-05	Significantly downregulated (Adj-P<0.01)
ENSG00000184205.14_TSPYL2	TSPYL2	0.543201	4.62123	4.96682	1.49453e-06	1.50467e-05	Significantly downregulated (Adj-P<0.01)
ENSG00000143171.12_RXRG	RXRG	-0.470885	4.33489	-4.96767	1.48869e-06	1.49974e-05	Significantly downregulated (Adj-P<0.01)
ENSG00000068745.14_IP6K2	IP6K2	0.334811	4.38419	4.96295	1.52116e-06	1.52954e-05	Significantly downregulated (Adj-P<0.01)
ENSG00000277494.1_GPIHBP1	GPIHBP1	-0.547921	3.86756	-4.96259	1.52366e-06	1.53012e-05	Significantly downregulated (Adj-P<0.01)
ENSG00000064102.14_INTS13	INTS13	-0.293112	3.4587	-4.94509	1.65025e-06	1.64579e-05	Significantly downregulated (Adj-P<0.01)
ENSG00000111605.17_CPSF6	CPSF6	0.289264	4.5981	4.96231	1.52561e-06	1.53038e-05	Significantly downregulated (Adj-P<0.01)
ENSG00000267328.1_AC002398.2	AC002398.2	-0.936591	-1.05072	-4.8744	2.27334e-06	2.18607e-05	Significantly downregulated (Adj-P<0.01)
ENSG00000196182.10_STK40	STK40	-0.400661	6.08497	-4.96228	1.52585e-06	1.53038e-05	Significantly downregulated (Adj-P<0.01)
ENSG00000113384.13_GOLPH3	GOLPH3	-0.323968	4.32567	-4.95844	1.55282e-06	1.55449e-05	Significantly downregulated (Adj-P<0.01)
ENSG00000143341.11_HMCN1	HMCN1	0.701175	2.6818	4.90607	1.97024e-06	1.92265e-05	Significantly downregulated (Adj-P<0.01)
ENSG00000279296.1_PRAL	PRAL	-0.884817	2.26748	-4.91424	1.8986e-06	1.86305e-05	Significantly downregulated (Adj-P<0.01)
ENSG00000132763.14_MMACHC	MMACHC	-0.331415	3.03104	-4.93182	1.75293e-06	1.73403e-05	Significantly downregulated (Adj-P<0.01)
ENSG00000229047.1_AF127577.1	AF127577.1	-1.23872	-0.383135	-4.86667	2.35385e-06	2.24862e-05	Significantly downregulated (Adj-P<0.01)
ENSG00000186432.8_KPNA4	KPNA4	-0.326459	7.7431	-4.94601	1.64338e-06	1.63997e-05	Significantly downregulated (Adj-P<0.01)
ENSG00000138756.17_BMP2K	BMP2K	0.617998	2.44469	4.89246	2.09535e-06	2.03597e-05	Significantly downregulated (Adj-P<0.01)
ENSG00000196565.14_HBG2	HBG2	-2.74384	-3.81007	-5.09127	8.42209e-07	9.20919e-06	Significantly downregulated (Adj-P<0.01)
ENSG00000181481.13_RNF135	RNF135	-0.482215	1.96339	-4.89402	2.08063e-06	2.02291e-05	Significantly downregulated (Adj-P<0.01)
ENSG00000130528.11_HRC	HRC	-0.244788	7.80573	-4.93587	1.721e-06	1.70884e-05	Significantly downregulated (Adj-P<0.01)
ENSG00000168118.11_RAB4A	RAB4A	-0.258434	5.27983	-4.94846	1.6251e-06	1.62275e-05	Significantly downregulated (Adj-P<0.01)
ENSG00000103316.10_CRYM	CRYM	-3.62736	-1.47544	-4.86422	2.38001e-06	2.26815e-05	Significantly downregulated (Adj-P<0.01)
ENSG00000182541.17_LIMK2	LIMK2	0.35258	3.29644	4.91601	1.88345e-06	1.85047e-05	Significantly downregulated (Adj-P<0.01)
ENSG00000091129.19_NRCAM	NRCAM	2.31031	-2.23303	5.21032	4.82084e-07	5.73767e-06	Significantly downregulated (Adj-P<0.01)
ENSG00000116117.17_PARD3B	PARD3B	0.355266	2.59116	4.8877	2.14093e-06	2.0714e-05	Significantly downregulated (Adj-P<0.01)
ENSG00000102349.17_KLF8	KLF8	0.523335	2.67698	4.89204	2.09927e-06	2.0373e-05	Significantly downregulated (Adj-P<0.01)
ENSG00000151233.10_GXYLT1	GXYLT1	0.36885	2.69562	4.88707	2.14697e-06	2.07597e-05	Significantly downregulated (Adj-P<0.01)
ENSG00000124749.16_COL21A1	COL21A1	1.1715	1.65944	4.85268	2.50681e-06	2.37191e-05	Significantly downregulated (Adj-P<0.01)
ENSG00000186104.10_CYP2R1	CYP2R1	0.405079	1.88375	4.86757	2.34434e-06	2.24088e-05	Significantly downregulated (Adj-P<0.01)
ENSG00000198677.11_TTC37	TTC37	0.264466	6.2091	4.93683	1.71349e-06	1.70245e-05	Significantly downregulated (Adj-P<0.01)
ENSG00000127603.25_MACF1	MACF1	0.338307	6.83408	4.93348	1.73974e-06	1.72529e-05	Significantly downregulated (Adj-P<0.01)
ENSG00000125246.15_CLYBL	CLYBL	-0.413585	3.85392	-4.92569	1.80245e-06	1.77969e-05	Significantly downregulated (Adj-P<0.01)
ENSG00000152104.11_PTPN14	PTPN14	0.382524	6.1917	4.93259	1.74686e-06	1.73018e-05	Significantly downregulated (Adj-P<0.01)
ENSG00000100478.14_AP4S1	AP4S1	-0.260616	2.95844	-4.9003	2.02231e-06	1.96982e-05	Significantly downregulated (Adj-P<0.01)
ENSG00000267724.1_AC012254.3	AC012254.3	1.27204	-1.28285	4.91951	1.85378e-06	1.82357e-05	Significantly downregulated (Adj-P<0.01)
ENSG00000278662.4_GOLGA6L10	GOLGA6L10	1.04514	1.04597	4.83791	2.67867e-06	2.5195e-05	Significantly downregulated (Adj-P<0.01)
ENSG00000135775.13_COG2	COG2	-0.229962	4.01566	-4.91757	1.87016e-06	1.83854e-05	Significantly downregulated (Adj-P<0.01)
ENSG00000169629.11_RGPD8	RGPD8	1.38599	1.46224	4.83624	2.69875e-06	2.53239e-05	Significantly downregulated (Adj-P<0.01)
ENSG00000244187.7_TMEM141	TMEM141	-0.396197	3.25323	-4.90993	1.93608e-06	1.8928e-05	Significantly downregulated (Adj-P<0.01)
ENSG00000139597.17_N4BP2L1	N4BP2L1	0.548309	3.39167	4.8917	2.10257e-06	2.03925e-05	Significantly downregulated (Adj-P<0.01)
ENSG00000134294.13_SLC38A2	SLC38A2	0.480093	7.89174	4.91567	1.88629e-06	1.85211e-05	Significantly downregulated (Adj-P<0.01)
ENSG00000188917.14_TRMT2B	TRMT2B	-0.328597	3.90066	-4.9115	1.92231e-06	1.88166e-05	Significantly downregulated (Adj-P<0.01)
ENSG00000180758.11_GPR157	GPR157	-0.46832	5.75084	-4.92163	1.83602e-06	1.80947e-05	Significantly downregulated (Adj-P<0.01)
ENSG00000122257.19_RBBP6	RBBP6	0.273229	5.18371	4.9211	1.84039e-06	1.81264e-05	Significantly downregulated (Adj-P<0.01)
ENSG00000101638.13_ST8SIA5	ST8SIA5	-0.71871	2.58421	-4.88821	2.13594e-06	2.06782e-05	Significantly downregulated (Adj-P<0.01)
ENSG00000066135.12_KDM4A	KDM4A	0.273057	3.95745	4.9069	1.96279e-06	1.91656e-05	Significantly downregulated (Adj-P<0.01)
ENSG00000057294.14_PKP2	PKP2	0.711539	2.82073	4.8662	2.35888e-06	2.25024e-05	Significantly downregulated (Adj-P<0.01)
ENSG00000247516.6_MIR4458HG	MIR4458HG	-0.459574	2.70244	-4.88092	2.20741e-06	2.12793e-05	Significantly downregulated (Adj-P<0.01)
ENSG00000228223.3_HCG11	HCG11	0.332512	3.77719	4.8909	2.11016e-06	2.04536e-05	Significantly downregulated (Adj-P<0.01)
ENSG00000124333.15_VAMP7	VAMP7	-0.249174	2.69335	-4.87127	2.30559e-06	2.2105e-05	Significantly downregulated (Adj-P<0.01)
ENSG00000124333.15_PAR_Y_VAMP7	PAR	-0.249174	2.69335	-4.87127	2.30559e-06	2.2105e-05	Significantly downregulated (Adj-P<0.01)
ENSG00000142494.13_SLC47A1	SLC47A1	-0.366725	4.90389	-4.91234	1.91505e-06	1.87687e-05	Significantly downregulated (Adj-P<0.01)
ENSG00000163626.16_COX18	COX18	-0.278448	3.33923	-4.88877	2.13055e-06	2.06386e-05	Significantly downregulated (Adj-P<0.01)
ENSG00000170917.13_NUDT6	NUDT6	-0.396671	2.31433	-4.86272	2.39612e-06	2.28213e-05	Significantly downregulated (Adj-P<0.01)
ENSG00000096080.11_MRPS18A	MRPS18A	-0.271132	4.70871	-4.90844	1.94919e-06	1.90445e-05	Significantly downregulated (Adj-P<0.01)
ENSG00000128917.7_DLL4	DLL4	-0.486714	2.30629	-4.86091	2.41568e-06	2.29664e-05	Significantly downregulated (Adj-P<0.01)
ENSG00000074317.10_SNCB	SNCB	-1.33916	-1.53016	-4.8344	2.72106e-06	2.5473e-05	Significantly downregulated (Adj-P<0.01)
ENSG00000184863.10_RBM33	RBM33	0.361033	6.39021	4.9037	1.99148e-06	1.94099e-05	Significantly downregulated (Adj-P<0.01)
ENSG00000246596.7_AC139795.1	AC139795.1	1.01921	0.195196	4.81749	2.93505e-06	2.72195e-05	Significantly downregulated (Adj-P<0.01)
ENSG00000140943.16_MBTPS1	MBTPS1	0.167742	4.98316	4.90377	1.99084e-06	1.94099e-05	Significantly downregulated (Adj-P<0.01)
ENSG00000177409.11_SAMD9L	SAMD9L	0.763897	2.62363	4.83934	2.6615e-06	2.50781e-05	Significantly downregulated (Adj-P<0.01)
ENSG00000198911.11_SREBF2	SREBF2	-0.255529	5.38774	-4.89842	2.03958e-06	1.98543e-05	Significantly downregulated (Adj-P<0.01)
ENSG00000148672.8_GLUD1	GLUD1	-0.226579	5.44562	-4.8966	2.05652e-06	2.0007e-05	Significantly downregulated (Adj-P<0.01)
ENSG00000096872.16_IFT74	IFT74	-0.342706	2.15788	-4.83216	2.74855e-06	2.56849e-05	Significantly downregulated (Adj-P<0.01)
ENSG00000165392.9_WRN	WRN	0.426446	1.8267	4.81587	2.95637e-06	2.73852e-05	Significantly downregulated (Adj-P<0.01)
ENSG00000062370.16_ZNF112	ZNF112	0.407934	1.44486	4.80875	3.05198e-06	2.81069e-05	Significantly downregulated (Adj-P<0.01)
ENSG00000150764.13_DIXDC1	DIXDC1	0.465483	4.87292	4.8863	2.15445e-06	2.08194e-05	Significantly downregulated (Adj-P<0.01)
ENSG00000088756.12_ARHGAP28	ARHGAP28	0.713302	2.64824	4.83483	2.71584e-06	2.54391e-05	Significantly downregulated (Adj-P<0.01)
ENSG00000058085.14_LAMC2	LAMC2	0.99824	-0.0649547	4.80452	3.11013e-06	2.85596e-05	Significantly downregulated (Adj-P<0.01)
ENSG00000048405.9_ZNF800	ZNF800	0.362047	2.25048	4.82424	2.84782e-06	2.65034e-05	Significantly downregulated (Adj-P<0.01)
ENSG00000183648.9_NDUFB1	NDUFB1	-0.503214	5.39427	-4.88579	2.15949e-06	2.08456e-05	Significantly downregulated (Adj-P<0.01)
ENSG00000186184.17_POLR1D	POLR1D	-0.227637	5.18696	-4.88575	2.15979e-06	2.08456e-05	Significantly downregulated (Adj-P<0.01)
ENSG00000250392.2_LINC02502	LINC02502	2.6326	-1.45285	5.01862	1.17855e-06	1.2238e-05	Significantly downregulated (Adj-P<0.01)
ENSG00000244005.12_NFS1	NFS1	-0.274794	4.34211	-4.88047	2.21193e-06	2.131e-05	Significantly downregulated (Adj-P<0.01)
ENSG00000135999.11_EPC2	EPC2	0.352915	3.6216	4.8568	2.46079e-06	2.33358e-05	Significantly downregulated (Adj-P<0.01)
ENSG00000196670.13_ZFP62	ZFP62	0.2859	3.54173	4.8567	2.46189e-06	2.33358e-05	Significantly downregulated (Adj-P<0.01)
ENSG00000138443.15_ABI2	ABI2	-0.330338	4.19116	-4.87427	2.27461e-06	2.18607e-05	Significantly downregulated (Adj-P<0.01)
ENSG00000196616.13_ADH1B	ADH1B	0.74662	5.25788	4.87769	2.2398e-06	2.15654e-05	Significantly downregulated (Adj-P<0.01)
ENSG00000157613.10_CREB3L1	CREB3L1	-0.628954	0.415359	-4.78962	3.32359e-06	3.0292e-05	Significantly downregulated (Adj-P<0.01)
ENSG00000177189.13_RPS6KA3	RPS6KA3	0.36602	6.99967	4.87493	2.26786e-06	2.18223e-05	Significantly downregulated (Adj-P<0.01)
ENSG00000196712.17_NF1	NF1	0.379737	4.5282	4.86997	2.31911e-06	2.22212e-05	Significantly downregulated (Adj-P<0.01)
ENSG00000130827.6_PLXNA3	PLXNA3	0.56385	2.93753	4.83756	2.68279e-06	2.52091e-05	Significantly downregulated (Adj-P<0.01)
ENSG00000134250.19_NOTCH2	NOTCH2	0.445761	4.09323	4.86228	2.40089e-06	2.28498e-05	Significantly downregulated (Adj-P<0.01)
ENSG00000164684.13_ZNF704	ZNF704	0.486828	4.45876	4.86611	2.3598e-06	2.25024e-05	Significantly downregulated (Adj-P<0.01)
ENSG00000131097.6_HIGD1B	HIGD1B	-0.51076	1.00839	-4.79793	3.20287e-06	2.93095e-05	Significantly downregulated (Adj-P<0.01)
ENSG00000198881.9_ASB12	ASB12	-0.372945	4.45909	-4.87343	2.28324e-06	2.19172e-05	Significantly downregulated (Adj-P<0.01)
ENSG00000185483.11_ROR1	ROR1	0.788055	0.0865915	4.78671	3.367e-06	3.06524e-05	Significantly downregulated (Adj-P<0.01)
ENSG00000147852.15_VLDLR	VLDLR	-0.365087	5.83287	-4.87402	2.2772e-06	2.18724e-05	Significantly downregulated (Adj-P<0.01)
ENSG00000137872.16_SEMA6D	SEMA6D	0.683348	4.31866	4.86218	2.40199e-06	2.28498e-05	Significantly downregulated (Adj-P<0.01)
ENSG00000101445.9_PPP1R16B	PPP1R16B	-0.610915	2.29178	-4.82343	2.85817e-06	2.65842e-05	Significantly downregulated (Adj-P<0.01)
ENSG00000243414.5_TICAM2	TICAM2	0.538929	2.13924	4.80133	3.15462e-06	2.89015e-05	Significantly downregulated (Adj-P<0.01)
ENSG00000167930.15_FAM234A	FAM234A	-0.295676	6.18862	-4.86939	2.3252e-06	2.22661e-05	Significantly downregulated (Adj-P<0.01)
ENSG00000074935.13_TUBE1	TUBE1	0.424967	3.27281	4.83592	2.70266e-06	2.53456e-05	Significantly downregulated (Adj-P<0.01)
ENSG00000155380.11_SLC16A1	SLC16A1	-0.470067	6.30265	-4.86889	2.33051e-06	2.23035e-05	Significantly downregulated (Adj-P<0.01)
ENSG00000108100.17_CCNY	CCNY	-0.194491	4.91059	-4.86811	2.33864e-06	2.23678e-05	Significantly downregulated (Adj-P<0.01)
ENSG00000237505.7_PKN2-AS1	PKN2-AS1	1.35915	0.387818	4.77078	3.61409e-06	3.26028e-05	Significantly downregulated (Adj-P<0.01)
ENSG00000135297.15_MTO1	MTO1	-0.231384	3.97718	-4.85323	2.50064e-06	2.36748e-05	Significantly downregulated (Adj-P<0.01)
ENSG00000258232.2_AC125611.3	AC125611.3	-0.945847	-0.374245	-4.76795	3.65973e-06	3.29023e-05	Significantly downregulated (Adj-P<0.01)
ENSG00000123575.8_FAM199X	FAM199X	0.330476	4.54352	4.85431	2.48847e-06	2.35737e-05	Significantly downregulated (Adj-P<0.01)
ENSG00000132846.5_ZBED3	ZBED3	-0.368963	2.29441	-4.80962	3.04008e-06	2.80135e-05	Significantly downregulated (Adj-P<0.01)
ENSG00000236830.6_CBR3-AS1	CBR3-AS1	-0.59654	-0.184439	-4.76297	3.74139e-06	3.34848e-05	Significantly downregulated (Adj-P<0.01)
ENSG00000225339.3_AL354740.1	AL354740.1	-0.536552	6.01164	-4.85741	2.45408e-06	2.33035e-05	Significantly downregulated (Adj-P<0.01)
ENSG00000143382.14_ADAMTSL4	ADAMTSL4	0.753084	6.28254	4.85682	2.46053e-06	2.33358e-05	Significantly downregulated (Adj-P<0.01)
ENSG00000111602.11_TIMELESS	TIMELESS	0.461405	1.71654	4.77886	3.48667e-06	3.1633e-05	Significantly downregulated (Adj-P<0.01)
ENSG00000175324.9_LSM1	LSM1	-0.269062	3.33668	-4.83752	2.68334e-06	2.52091e-05	Significantly downregulated (Adj-P<0.01)
ENSG00000205629.11_LCMT1	LCMT1	-0.215011	4.13572	-4.85043	2.53224e-06	2.39312e-05	Significantly downregulated (Adj-P<0.01)
ENSG00000147853.16_AK3	AK3	-0.543284	7.53872	-4.84584	2.58503e-06	2.43865e-05	Significantly downregulated (Adj-P<0.01)
ENSG00000123472.12_ATPAF1	ATPAF1	-0.256428	7.11419	-4.84708	2.57066e-06	2.42798e-05	Significantly downregulated (Adj-P<0.01)
ENSG00000158528.11_PPP1R9A	PPP1R9A	0.440576	4.12274	4.83833	2.67361e-06	2.51624e-05	Significantly downregulated (Adj-P<0.01)
ENSG00000148516.21_ZEB1	ZEB1	0.328429	6.49148	4.8512	2.5235e-06	2.38628e-05	Significantly downregulated (Adj-P<0.01)
ENSG00000126106.13_TMEM53	TMEM53	-0.515136	0.847308	-4.76876	3.64664e-06	3.28564e-05	Significantly downregulated (Adj-P<0.01)
ENSG00000174456.13_C12orf76	C12orf76	0.313203	2.19092	4.78947	3.32593e-06	3.0296e-05	Significantly downregulated (Adj-P<0.01)
ENSG00000213563.6_C8orf82	C8orf82	-0.391734	3.729	-4.83856	2.67079e-06	2.51507e-05	Significantly downregulated (Adj-P<0.01)
ENSG00000105185.11_PDCD5	PDCD5	-0.321837	4.98042	-4.84666	2.57544e-06	2.43105e-05	Significantly downregulated (Adj-P<0.01)
ENSG00000184601.10_C14orf180	C14orf180	1.27412	1.90178	4.7741	3.56116e-06	3.21985e-05	Significantly downregulated (Adj-P<0.01)
ENSG00000168702.17_LRP1B	LRP1B	1.16981	3.75221	4.80665	3.08072e-06	2.83387e-05	Significantly downregulated (Adj-P<0.01)
ENSG00000150687.11_PRSS23	PRSS23	-0.619057	5.08083	-4.84407	2.60562e-06	2.45662e-05	Significantly downregulated (Adj-P<0.01)
ENSG00000254873.1_AP001267.1	AP001267.1	-0.578097	2.86467	-4.81014	3.033e-06	2.79808e-05	Significantly downregulated (Adj-P<0.01)
ENSG00000013563.13_DNASE1L1	DNASE1L1	0.283635	6.729	4.83653	2.69522e-06	2.53058e-05	Significantly downregulated (Adj-P<0.01)
ENSG00000185739.13_SRL	SRL	-0.228428	9.31801	-4.81085	3.02339e-06	2.79246e-05	Significantly downregulated (Adj-P<0.01)
ENSG00000278834.1_AC073508.3	AC073508.3	-0.411518	1.43807	-4.76504	3.70726e-06	3.32305e-05	Significantly downregulated (Adj-P<0.01)
ENSG00000159256.12_MORC3	MORC3	0.33598	5.03609	4.83543	2.70851e-06	2.53855e-05	Significantly downregulated (Adj-P<0.01)
ENSG00000197782.14_ZNF780A	ZNF780A	0.40535	2.04131	4.76594	3.69244e-06	3.31401e-05	Significantly downregulated (Adj-P<0.01)
ENSG00000167380.16_ZNF226	ZNF226	0.418534	2.44037	4.77808	3.4987e-06	3.1706e-05	Significantly downregulated (Adj-P<0.01)
ENSG00000154874.15_CCDC144B	CCDC144B	1.82338	0.128832	4.76495	3.70879e-06	3.32305e-05	Significantly downregulated (Adj-P<0.01)
ENSG00000060642.10_PIGV	PIGV	0.370967	1.57387	4.75656	3.84929e-06	3.4219e-05	Significantly downregulated (Adj-P<0.01)
ENSG00000082293.12_COL19A1	COL19A1	3.50619	-1.35647	5.05655	9.89344e-07	1.05634e-05	Significantly downregulated (Adj-P<0.01)
ENSG00000100599.15_RIN3	RIN3	-0.629853	1.60517	-4.76839	3.65255e-06	3.28564e-05	Significantly downregulated (Adj-P<0.01)
ENSG00000168916.15_ZNF608	ZNF608	0.764234	2.25634	4.76634	3.68592e-06	3.31003e-05	Significantly downregulated (Adj-P<0.01)
ENSG00000126775.8_ATG14	ATG14	0.245654	5.06924	4.83303	2.73782e-06	2.55997e-05	Significantly downregulated (Adj-P<0.01)
ENSG00000101040.19_ZMYND8	ZMYND8	0.362915	4.25013	4.82105	2.88871e-06	2.68239e-05	Significantly downregulated (Adj-P<0.01)
ENSG00000174243.9_DDX23	DDX23	0.230369	5.49695	4.83342	2.73303e-06	2.557e-05	Significantly downregulated (Adj-P<0.01)
ENSG00000143379.12_SETDB1	SETDB1	0.191183	4.18413	4.82291	2.86482e-06	2.66304e-05	Significantly downregulated (Adj-P<0.01)
ENSG00000035664.11_DAPK2	DAPK2	0.258925	6.82893	4.82857	2.79316e-06	2.60558e-05	Significantly downregulated (Adj-P<0.01)
ENSG00000113916.17_BCL6	BCL6	0.663887	8.02388	4.82103	2.88902e-06	2.68239e-05	Significantly downregulated (Adj-P<0.01)
ENSG00000225342.2_AC079630.1	AC079630.1	0.865516	-0.706118	4.7668	3.6784e-06	3.30514e-05	Significantly downregulated (Adj-P<0.01)
ENSG00000116016.13_EPAS1	EPAS1	-0.455718	6.33163	-4.82683	2.81499e-06	2.62286e-05	Significantly downregulated (Adj-P<0.01)
ENSG00000155324.9_GRAMD2B	GRAMD2B	0.691806	1.36962	4.73793	4.17988e-06	3.66652e-05	Significantly downregulated (Adj-P<0.01)
ENSG00000116030.16_SUMO1	SUMO1	-0.181955	5.47657	-4.8299	2.77646e-06	2.59305e-05	Significantly downregulated (Adj-P<0.01)
ENSG00000144231.10_POLR2D	POLR2D	-0.232162	5.0042	-4.82889	2.78916e-06	2.60338e-05	Significantly downregulated (Adj-P<0.01)
ENSG00000123612.15_ACVR1C	ACVR1C	1.06544	0.380952	4.73332	4.26587e-06	3.72736e-05	Significantly downregulated (Adj-P<0.01)
ENSG00000050405.13_LIMA1	LIMA1	0.397123	4.82437	4.82471	2.84178e-06	2.64627e-05	Significantly downregulated (Adj-P<0.01)
ENSG00000167100.14_SAMD14	SAMD14	-0.478107	1.23687	-4.75656	3.84921e-06	3.4219e-05	Significantly downregulated (Adj-P<0.01)
ENSG00000100554.11_ATP6V1D	ATP6V1D	-0.225283	4.89014	-4.82729	2.8091e-06	2.61891e-05	Significantly downregulated (Adj-P<0.01)
ENSG00000115109.13_EPB41L5	EPB41L5	0.410997	3.98039	4.80973	3.03865e-06	2.80135e-05	Significantly downregulated (Adj-P<0.01)
ENSG00000185761.10_ADAMTSL5	ADAMTSL5	-0.466781	3.37249	-4.81117	3.01913e-06	2.79015e-05	Significantly downregulated (Adj-P<0.01)
ENSG00000187951.11_AC091057.1	AC091057.1	1.94433	0.254844	4.73482	4.23769e-06	3.70869e-05	Significantly downregulated (Adj-P<0.01)
ENSG00000120802.13_TMPO	TMPO	0.34011	3.85467	4.80222	3.14221e-06	2.88375e-05	Significantly downregulated (Adj-P<0.01)
ENSG00000244734.4_HBB	HBB	-2.28692	6.5889	-4.81467	2.97226e-06	2.75164e-05	Significantly downregulated (Adj-P<0.01)
ENSG00000104998.3_IL27RA	IL27RA	-0.528193	0.927736	-4.73472	4.23964e-06	3.70869e-05	Significantly downregulated (Adj-P<0.01)
ENSG00000213859.5_KCTD11	KCTD11	-0.300923	1.90653	-4.76102	3.77394e-06	3.37381e-05	Significantly downregulated (Adj-P<0.01)
ENSG00000278918.1_AC080112.3	AC080112.3	-0.876886	-1.64223	-4.73534	4.22809e-06	3.70267e-05	Significantly downregulated (Adj-P<0.01)
ENSG00000003509.15_NDUFAF7	NDUFAF7	-0.261684	3.80514	-4.80555	3.09589e-06	2.84453e-05	Significantly downregulated (Adj-P<0.01)
ENSG00000182518.13_FAM104B	FAM104B	-0.310672	2.12651	-4.76346	3.73336e-06	3.34318e-05	Significantly downregulated (Adj-P<0.01)
ENSG00000066248.14_NGEF	NGEF	1.5303	-1.5008	4.81954	2.90834e-06	2.69875e-05	Significantly downregulated (Adj-P<0.01)
ENSG00000279232.2_AC008522.1	AC008522.1	3.01216	1.77788	4.72555	4.41467e-06	3.84275e-05	Significantly downregulated (Adj-P<0.01)
ENSG00000181817.5_LSM10	LSM10	-0.375318	5.12102	-4.81667	2.94578e-06	2.7303e-05	Significantly downregulated (Adj-P<0.01)
ENSG00000198933.9_TBKBP1	TBKBP1	-0.372972	4.44327	-4.81439	2.97596e-06	2.75346e-05	Significantly downregulated (Adj-P<0.01)
ENSG00000261971.7_MMP25-AS1	MMP25-AS1	-0.605854	1.53276	-4.74861	3.98719e-06	3.53065e-05	Significantly downregulated (Adj-P<0.01)
ENSG00000100941.8_PNN	PNN	0.236095	5.64539	4.81399	2.98132e-06	2.75681e-05	Significantly downregulated (Adj-P<0.01)
ENSG00000112293.14_GPLD1	GPLD1	0.785145	1.07651	4.71689	4.58642e-06	3.97482e-05	Significantly downregulated (Adj-P<0.01)
ENSG00000231672.6_DIRC3	DIRC3	0.98593	-1.24231	4.77218	3.59167e-06	3.24374e-05	Significantly downregulated (Adj-P<0.01)
ENSG00000104824.17_HNRNPL	HNRNPL	0.202081	6.75359	4.80582	3.09206e-06	2.84265e-05	Significantly downregulated (Adj-P<0.01)
ENSG00000164967.9_RPP25L	RPP25L	-0.388096	4.84874	-4.81024	3.03168e-06	2.79808e-05	Significantly downregulated (Adj-P<0.01)
ENSG00000215386.12_MIR99AHG	MIR99AHG	0.485883	2.64332	4.75382	3.89631e-06	3.4579e-05	Significantly downregulated (Adj-P<0.01)
ENSG00000237522.1_NONOP2	NONOP2	1.18705	-1.40071	4.85825	2.44475e-06	2.32288e-05	Significantly downregulated (Adj-P<0.01)
ENSG00000115241.10_PPM1G	PPM1G	-0.23063	5.41456	-4.80726	3.07227e-06	2.82774e-05	Significantly downregulated (Adj-P<0.01)
ENSG00000240401.8_AC012358.3	AC012358.3	-0.637089	-0.451655	-4.70725	4.78518e-06	4.14029e-05	Significantly downregulated (Adj-P<0.01)
ENSG00000213585.10_VDAC1	VDAC1	-0.247125	8.90015	-4.78231	3.43355e-06	3.11868e-05	Significantly downregulated (Adj-P<0.01)
ENSG00000119684.15_MLH3	MLH3	0.265617	3.68143	4.7806	3.4598e-06	3.14072e-05	Significantly downregulated (Adj-P<0.01)
ENSG00000108671.10_PSMD11	PSMD11	-0.187977	5.91299	-4.80207	3.14433e-06	2.88403e-05	Significantly downregulated (Adj-P<0.01)
ENSG00000146021.14_KLHL3	KLHL3	0.48256	2.18158	4.73249	4.28158e-06	3.73509e-05	Significantly downregulated (Adj-P<0.01)
ENSG00000111726.12_CMAS	CMAS	-0.265882	4.50533	-4.79956	3.17971e-06	2.91143e-05	Significantly downregulated (Adj-P<0.01)
ENSG00000205981.7_DNAJC19	DNAJC19	-0.246527	5.50475	-4.80133	3.15464e-06	2.89015e-05	Significantly downregulated (Adj-P<0.01)
ENSG00000251369.8_ZNF550	ZNF550	0.405663	2.34165	4.73883	4.16346e-06	3.65616e-05	Significantly downregulated (Adj-P<0.01)
ENSG00000102226.9_USP11	USP11	0.304812	4.77654	4.79705	3.21549e-06	2.9408e-05	Significantly downregulated (Adj-P<0.01)
ENSG00000051825.14_MPHOSPH9	MPHOSPH9	0.3707	3.23004	4.76152	3.76555e-06	3.3682e-05	Significantly downregulated (Adj-P<0.01)
ENSG00000198563.13_DDX39B	DDX39B	0.193708	6.99209	4.793	3.27406e-06	2.98802e-05	Significantly downregulated (Adj-P<0.01)
ENSG00000268573.1_AC011815.1	AC011815.1	0.706665	-1.1016	4.747	4.01562e-06	3.55385e-05	Significantly downregulated (Adj-P<0.01)
ENSG00000165996.13_HACD1	HACD1	-0.467391	3.95676	-4.79115	3.30112e-06	3.01045e-05	Significantly downregulated (Adj-P<0.01)
ENSG00000157107.13_FCHO2	FCHO2	0.405415	3.99719	4.77707	3.51453e-06	3.18313e-05	Significantly downregulated (Adj-P<0.01)
ENSG00000109819.8_PPARGC1A	PPARGC1A	-0.65173	5.59987	-4.7946	3.25077e-06	2.97136e-05	Significantly downregulated (Adj-P<0.01)
ENSG00000256694.1_AC026369.2	AC026369.2	-0.810834	-0.880593	-4.69858	4.9709e-06	4.27535e-05	Significantly downregulated (Adj-P<0.01)
ENSG00000214530.9_STARD10	STARD10	-0.343712	4.90037	-4.79404	3.25885e-06	2.97703e-05	Significantly downregulated (Adj-P<0.01)
ENSG00000171016.12_PYGO1	PYGO1	0.4839	5.80214	4.79296	3.27465e-06	2.98802e-05	Significantly downregulated (Adj-P<0.01)
ENSG00000166439.5_RNF169	RNF169	0.46745	4.01659	4.76945	3.63541e-06	3.27765e-05	Significantly downregulated (Adj-P<0.01)
ENSG00000204256.12_BRD2	BRD2	0.189205	6.49901	4.7832	3.41992e-06	3.11018e-05	Significantly downregulated (Adj-P<0.01)
ENSG00000157693.14_TMEM268	TMEM268	-0.309771	2.53458	-4.74183	4.10855e-06	3.6201e-05	Significantly downregulated (Adj-P<0.01)
ENSG00000128655.17_PDE11A	PDE11A	1.19787	3.98353	4.75173	3.93253e-06	3.48614e-05	Significantly downregulated (Adj-P<0.01)
ENSG00000141084.10_RANBP10	RANBP10	0.212671	4.77541	4.78318	3.42028e-06	3.11018e-05	Significantly downregulated (Adj-P<0.01)
ENSG00000130997.16_POLN	POLN	0.703937	-0.208765	4.6879	5.20938e-06	4.45392e-05	Significantly downregulated (Adj-P<0.01)
ENSG00000115825.9_PRKD3	PRKD3	0.360387	4.33173	4.77108	3.60926e-06	3.25777e-05	Significantly downregulated (Adj-P<0.01)
ENSG00000267002.3_AC060780.1	AC060780.1	0.318934	3.43585	4.75673	3.84637e-06	3.4219e-05	Significantly downregulated (Adj-P<0.01)
ENSG00000131467.10_PSME3	PSME3	-0.161468	5.05327	-4.78303	3.42251e-06	3.11043e-05	Significantly downregulated (Adj-P<0.01)
ENSG00000100216.5_TOMM22	TOMM22	-0.230441	4.12116	-4.77457	3.55371e-06	3.21494e-05	Significantly downregulated (Adj-P<0.01)
ENSG00000135537.16_AFG1L	AFG1L	-0.408832	1.55697	-4.70566	4.81866e-06	4.16019e-05	Significantly downregulated (Adj-P<0.01)
ENSG00000138381.9_ASNSD1	ASNSD1	-0.221921	5.43913	-4.77857	3.49112e-06	3.16554e-05	Significantly downregulated (Adj-P<0.01)
ENSG00000151461.19_UPF2	UPF2	0.2375	5.0868	4.77477	3.55061e-06	3.21397e-05	Significantly downregulated (Adj-P<0.01)
ENSG00000078668.13_VDAC3	VDAC3	-0.244947	8.45104	-4.75816	3.82207e-06	3.40724e-05	Significantly downregulated (Adj-P<0.01)
ENSG00000123388.4_HOXC11	HOXC11	-0.808234	-1.23724	-4.68133	5.36154e-06	4.5668e-05	Significantly downregulated (Adj-P<0.01)
ENSG00000144199.11_FAHD2B	FAHD2B	-0.293981	3.60461	-4.76018	3.78798e-06	3.38255e-05	Significantly downregulated (Adj-P<0.01)
ENSG00000174808.11_BTC	BTC	1.56283	-1.31805	4.76852	3.65052e-06	3.28564e-05	Significantly downregulated (Adj-P<0.01)
ENSG00000167110.17_GOLGA2	GOLGA2	-0.166254	5.70904	-4.77227	3.59017e-06	3.24374e-05	Significantly downregulated (Adj-P<0.01)
ENSG00000183597.15_TANGO2	TANGO2	-0.50101	3.3407	-4.75388	3.89516e-06	3.4579e-05	Significantly downregulated (Adj-P<0.01)
ENSG00000120071.14_KANSL1	KANSL1	0.244152	4.6985	4.7686	3.64914e-06	3.28564e-05	Significantly downregulated (Adj-P<0.01)
ENSG00000281852.1_LINC00891	LINC00891	1.06292	-1.08445	4.74296	4.08809e-06	3.60719e-05	Significantly downregulated (Adj-P<0.01)
ENSG00000079393.20_DUSP13	DUSP13	-0.341985	7.33473	-4.75987	3.79328e-06	3.38538e-05	Significantly downregulated (Adj-P<0.01)
ENSG00000089041.16_P2RX7	P2RX7	1.11939	-0.68858	4.70637	4.80379e-06	4.15186e-05	Significantly downregulated (Adj-P<0.01)
ENSG00000008086.11_CDKL5	CDKL5	0.47011	1.87067	4.68652	5.24095e-06	4.47368e-05	Significantly downregulated (Adj-P<0.01)
ENSG00000156928.4_MALSU1	MALSU1	-0.306116	4.77337	-4.76521	3.70449e-06	3.32294e-05	Significantly downregulated (Adj-P<0.01)
ENSG00000186395.7_KRT10	KRT10	-0.456273	3.21861	-4.74473	4.05626e-06	3.58581e-05	Significantly downregulated (Adj-P<0.01)
ENSG00000184983.10_NDUFA6	NDUFA6	-0.346405	6.58178	-4.75774	3.82916e-06	3.41165e-05	Significantly downregulated (Adj-P<0.01)
ENSG00000121741.16_ZMYM2	ZMYM2	0.331839	5.26547	4.76075	3.77841e-06	3.3759e-05	Significantly downregulated (Adj-P<0.01)
ENSG00000130348.11_QRSL1	QRSL1	-0.32495	4.54707	-4.75835	3.81885e-06	3.40628e-05	Significantly downregulated (Adj-P<0.01)
ENSG00000233593.8_AL590094.1	AL590094.1	-0.431306	1.35572	-4.68548	5.26498e-06	4.49178e-05	Significantly downregulated (Adj-P<0.01)
ENSG00000140386.12_SCAPER	SCAPER	0.356601	4.20132	4.7416	4.1128e-06	3.62168e-05	Significantly downregulated (Adj-P<0.01)
ENSG00000254445.1_HSPB2-C11orf52	HSPB2-C11orf52	0.547943	4.16659	4.74674	4.02026e-06	3.55597e-05	Significantly downregulated (Adj-P<0.01)
ENSG00000008294.20_SPAG9	SPAG9	0.306079	6.68924	4.75431	3.88775e-06	3.45416e-05	Significantly downregulated (Adj-P<0.01)
ENSG00000077943.7_ITGA8	ITGA8	-0.885568	1.56803	-4.68251	5.3339e-06	4.5457e-05	Significantly downregulated (Adj-P<0.01)
ENSG00000166783.21_MARF1	MARF1	0.260535	5.77898	4.75723	3.8379e-06	3.41752e-05	Significantly downregulated (Adj-P<0.01)
ENSG00000103043.14_VAC14	VAC14	-0.221702	4.20569	-4.75176	3.93203e-06	3.48614e-05	Significantly downregulated (Adj-P<0.01)
ENSG00000163728.10_TTC14	TTC14	0.297913	3.8924	4.73753	4.18736e-06	3.67105e-05	Significantly downregulated (Adj-P<0.01)
ENSG00000133020.4_MYH8	MYH8	2.77468	4.62243	4.70442	4.84502e-06	4.17841e-05	Significantly downregulated (Adj-P<0.01)
ENSG00000163754.17_GYG1	GYG1	-0.341244	7.63515	-4.74288	4.08953e-06	3.60719e-05	Significantly downregulated (Adj-P<0.01)
ENSG00000125149.11_C16orf70	C16orf70	-0.184215	3.64803	-4.73817	4.17557e-06	3.66476e-05	Significantly downregulated (Adj-P<0.01)
ENSG00000184220.11_CMSS1	CMSS1	0.458439	3.18116	4.71655	4.59331e-06	3.97861e-05	Significantly downregulated (Adj-P<0.01)
ENSG00000162627.16_SNX7	SNX7	1.03888	0.968293	4.65119	6.11625e-06	5.12713e-05	Significantly downregulated (Adj-P<0.01)
ENSG00000121964.14_GTDC1	GTDC1	-0.366973	3.4726	-4.73305	4.27109e-06	3.72799e-05	Significantly downregulated (Adj-P<0.01)
ENSG00000130783.13_CCDC62	CCDC62	0.743681	-0.345424	4.66117	5.8557e-06	4.92431e-05	Significantly downregulated (Adj-P<0.01)
ENSG00000206149.10_HERC2P9	HERC2P9	0.361555	4.22097	4.73986	4.14456e-06	3.64157e-05	Significantly downregulated (Adj-P<0.01)
ENSG00000160688.18_FLAD1	FLAD1	-0.21618	4.04883	-4.74064	4.13028e-06	3.63305e-05	Significantly downregulated (Adj-P<0.01)
ENSG00000156265.15_MAP3K7CL	MAP3K7CL	0.839105	4.29337	4.73321	4.26802e-06	3.72736e-05	Significantly downregulated (Adj-P<0.01)
ENSG00000183889.12_PKD1P1	PKD1P1	0.328347	6.50605	4.74383	4.07246e-06	3.59613e-05	Significantly downregulated (Adj-P<0.01)
ENSG00000113522.13_RAD50	RAD50	0.345392	4.81337	4.74026	4.13722e-06	3.63713e-05	Significantly downregulated (Adj-P<0.01)
ENSG00000075785.12_RAB7A	RAB7A	-0.147236	7.50357	-4.73626	4.21096e-06	3.6897e-05	Significantly downregulated (Adj-P<0.01)
ENSG00000277778.2_PGM5P2	PGM5P2	0.966066	-0.591411	4.66451	5.77091e-06	4.87365e-05	Significantly downregulated (Adj-P<0.01)
ENSG00000248643.5_RBM14-RBM4	RBM14-RBM4	0.758515	1.49556	4.65531	6.00743e-06	5.04122e-05	Significantly downregulated (Adj-P<0.01)
ENSG00000198793.12_MTOR	MTOR	-0.281771	5.7808	-4.74432	4.06357e-06	3.59028e-05	Significantly downregulated (Adj-P<0.01)
ENSG00000166266.13_CUL5	CUL5	0.313551	6.81109	4.74094	4.12471e-06	3.63016e-05	Significantly downregulated (Adj-P<0.01)
ENSG00000147669.10_POLR2K	POLR2K	-0.203803	3.54722	-4.72563	4.4132e-06	3.84275e-05	Significantly downregulated (Adj-P<0.01)
ENSG00000108474.16_PIGL	PIGL	0.353336	1.9327	4.67356	5.54708e-06	4.70214e-05	Significantly downregulated (Adj-P<0.01)
ENSG00000125863.19_MKKS	MKKS	-0.301448	4.87109	-4.74182	4.10873e-06	3.6201e-05	Significantly downregulated (Adj-P<0.01)
ENSG00000197872.11_FAM49A	FAM49A	-0.593559	2.83167	-4.70496	4.83367e-06	4.17088e-05	Significantly downregulated (Adj-P<0.01)
ENSG00000197016.11_ZNF470	ZNF470	0.470851	1.2534	4.64553	6.269e-06	5.23032e-05	Significantly downregulated (Adj-P<0.01)
ENSG00000227124.9_ZNF717	ZNF717	0.43093	1.23878	4.64416	6.30656e-06	5.25337e-05	Significantly downregulated (Adj-P<0.01)
ENSG00000142556.18_ZNF614	ZNF614	0.373745	2.45201	4.67507	5.51063e-06	4.67374e-05	Significantly downregulated (Adj-P<0.01)
ENSG00000117139.17_KDM5B	KDM5B	-0.351518	2.82092	-4.69286	5.09725e-06	4.37669e-05	Significantly downregulated (Adj-P<0.01)
ENSG00000129353.14_SLC44A2	SLC44A2	0.309744	6.79172	4.73118	4.30642e-06	3.75469e-05	Significantly downregulated (Adj-P<0.01)
ENSG00000171408.13_PDE7B	PDE7B	-0.347558	2.77653	-4.69248	5.10574e-06	4.37946e-05	Significantly downregulated (Adj-P<0.01)
ENSG00000123066.8_MED13L	MED13L	0.405537	6.20413	4.73395	4.25411e-06	3.7193e-05	Significantly downregulated (Adj-P<0.01)
ENSG00000185567.6_AHNAK2	AHNAK2	1.14577	1.15451	4.63153	6.66258e-06	5.49231e-05	Significantly downregulated (Adj-P<0.01)
ENSG00000117640.17_MTFR1L	MTFR1L	-0.276593	6.57019	-4.72636	4.39888e-06	3.83321e-05	Significantly downregulated (Adj-P<0.01)
ENSG00000111802.13_TDP2	TDP2	-0.239624	3.52588	-4.70958	4.73635e-06	4.10028e-05	Significantly downregulated (Adj-P<0.01)
ENSG00000121454.5_LHX4	LHX4	0.834364	-0.333769	4.63178	6.65559e-06	5.48957e-05	Significantly downregulated (Adj-P<0.01)
ENSG00000067365.14_METTL22	METTL22	-0.296977	4.64234	-4.72502	4.42493e-06	3.84746e-05	Significantly downregulated (Adj-P<0.01)
ENSG00000196781.14_TLE1	TLE1	0.48952	6.12964	4.7239	4.44695e-06	3.86449e-05	Significantly downregulated (Adj-P<0.01)
ENSG00000141219.15_C17orf80	C17orf80	0.203496	4.65087	4.71982	4.52758e-06	3.9324e-05	Significantly downregulated (Adj-P<0.01)
ENSG00000236404.9_VLDLR-AS1	VLDLR-AS1	-0.646018	0.0448583	-4.62103	6.9734e-06	5.69688e-05	Significantly downregulated (Adj-P<0.01)
ENSG00000205763.13_RP9P	RP9P	-0.442155	2.20126	-4.6728	5.56544e-06	4.71492e-05	Significantly downregulated (Adj-P<0.01)
ENSG00000089818.17_NECAP1	NECAP1	0.292681	3.33001	4.69074	5.14487e-06	4.40826e-05	Significantly downregulated (Adj-P<0.01)
ENSG00000134490.13_TMEM241	TMEM241	-0.545543	-0.105887	-4.61691	7.09921e-06	5.77429e-05	Significantly downregulated (Adj-P<0.01)
ENSG00000062582.13_MRPS24	MRPS24	-0.345441	6.2367	-4.71711	4.58204e-06	3.97318e-05	Significantly downregulated (Adj-P<0.01)
ENSG00000127334.10_DYRK2	DYRK2	0.420288	6.08696	4.71966	4.53075e-06	3.93301e-05	Significantly downregulated (Adj-P<0.01)
ENSG00000136826.14_KLF4	KLF4	0.631504	2.16615	4.64837	6.19184e-06	5.16865e-05	Significantly downregulated (Adj-P<0.01)
ENSG00000204116.11_CHIC1	CHIC1	-0.737	2.07935	-4.66315	5.80534e-06	4.89492e-05	Significantly downregulated (Adj-P<0.01)
ENSG00000185880.12_TRIM69	TRIM69	-0.475026	4.91695	-4.71745	4.57507e-06	3.96931e-05	Significantly downregulated (Adj-P<0.01)
ENSG00000139116.18_KIF21A	KIF21A	0.391	4.41852	4.70216	4.89344e-06	4.21787e-05	Significantly downregulated (Adj-P<0.01)
ENSG00000048162.20_NOP16	NOP16	-0.339325	3.48443	-4.70068	4.92542e-06	4.23854e-05	Significantly downregulated (Adj-P<0.01)
ENSG00000054267.21_ARID4B	ARID4B	0.322195	4.1256	4.68989	5.16408e-06	4.41804e-05	Significantly downregulated (Adj-P<0.01)
ENSG00000175262.14_C1orf127	C1orf127	0.701294	4.1455	4.70203	4.89631e-06	4.21805e-05	Significantly downregulated (Adj-P<0.01)
ENSG00000151067.21_CACNA1C	CACNA1C	-0.526055	1.56958	-4.63897	6.45064e-06	5.34827e-05	Significantly downregulated (Adj-P<0.01)
ENSG00000112144.15_ICK	ICK	0.413013	3.09604	4.66952	5.64592e-06	4.77827e-05	Significantly downregulated (Adj-P<0.01)
ENSG00000164327.12_RICTOR	RICTOR	0.440806	5.04855	4.70666	4.79751e-06	4.1487e-05	Significantly downregulated (Adj-P<0.01)
ENSG00000068120.14_COASY	COASY	-0.250888	4.32741	-4.70586	4.81442e-06	4.15879e-05	Significantly downregulated (Adj-P<0.01)
ENSG00000120458.11_MSANTD2	MSANTD2	0.32593	2.5505	4.64903	6.17412e-06	5.16473e-05	Significantly downregulated (Adj-P<0.01)
ENSG00000270110.1_AL353593.3	AL353593.3	-0.932136	-0.684002	-4.60496	7.47653e-06	6.04711e-05	Significantly downregulated (Adj-P<0.01)
ENSG00000134333.13_LDHA	LDHA	-0.764496	9.09241	-4.67619	5.48363e-06	4.65581e-05	Significantly downregulated (Adj-P<0.01)
ENSG00000163817.15_SLC6A20	SLC6A20	-1.14688	-1.73432	-4.62154	6.95812e-06	5.68868e-05	Significantly downregulated (Adj-P<0.01)
ENSG00000064652.10_SNX24	SNX24	-0.295225	2.35391	-4.64903	6.1741e-06	5.16473e-05	Significantly downregulated (Adj-P<0.01)
ENSG00000117859.18_OSBPL9	OSBPL9	0.318515	5.89066	4.70157	4.90602e-06	4.22413e-05	Significantly downregulated (Adj-P<0.01)
ENSG00000198105.13_ZNF248	ZNF248	0.315692	3.75944	4.67786	5.44373e-06	4.63036e-05	Significantly downregulated (Adj-P<0.01)
ENSG00000188089.13_PLA2G4E	PLA2G4E	1.2315	0.140991	4.59495	7.8072e-06	6.2762e-05	Significantly downregulated (Adj-P<0.01)
ENSG00000141338.13_ABCA8	ABCA8	0.48889	4.64268	4.69275	5.09975e-06	4.37669e-05	Significantly downregulated (Adj-P<0.01)
ENSG00000130513.6_GDF15	GDF15	3.14274	-2.70769	5.02455	1.14681e-06	1.19317e-05	Significantly downregulated (Adj-P<0.01)
ENSG00000113658.17_SMAD5	SMAD5	0.292928	4.72788	4.68987	5.16463e-06	4.41804e-05	Significantly downregulated (Adj-P<0.01)
ENSG00000152767.16_FARP1	FARP1	-0.697608	4.1639	-4.68988	5.16431e-06	4.41804e-05	Significantly downregulated (Adj-P<0.01)
ENSG00000285476.1_AC139491.7	AC139491.7	2.92377	-2.3644	4.98331	1.38594e-06	1.41066e-05	Significantly downregulated (Adj-P<0.01)
ENSG00000145777.14_TSLP	TSLP	-0.671594	-0.10975	-4.58893	8.01291e-06	6.4193e-05	Significantly downregulated (Adj-P<0.01)
ENSG00000112062.10_MAPK14	MAPK14	0.20893	5.38162	4.69421	5.06721e-06	4.35583e-05	Significantly downregulated (Adj-P<0.01)
ENSG00000065054.13_SLC9A3R2	SLC9A3R2	-0.444784	5.24281	-4.6936	5.0808e-06	4.36515e-05	Significantly downregulated (Adj-P<0.01)
ENSG00000158435.7_CNOT11	CNOT11	-0.18987	4.28367	-4.68724	5.22463e-06	4.46215e-05	Significantly downregulated (Adj-P<0.01)
ENSG00000250510.7_GPR162	GPR162	-0.800737	-0.323808	-4.58684	8.0854e-06	6.47036e-05	Significantly downregulated (Adj-P<0.01)
ENSG00000272054.1_AC007390.2	AC007390.2	0.711814	-0.0185175	4.60277	7.54751e-06	6.09211e-05	Significantly downregulated (Adj-P<0.01)
ENSG00000197006.13_METTL9	METTL9	-0.177575	5.86062	-4.69201	5.11629e-06	4.38614e-05	Significantly downregulated (Adj-P<0.01)
ENSG00000108387.14_SEPT4	2020-09-04	-0.384859	2.03503	-4.6333	6.61165e-06	5.45882e-05	Significantly downregulated (Adj-P<0.01)
ENSG00000169764.15_UGP2	UGP2	-0.329895	8.10445	-4.67699	5.46454e-06	4.64208e-05	Significantly downregulated (Adj-P<0.01)
ENSG00000171051.8_FPR1	FPR1	-2.04461	-2.96575	-4.72542	4.4173e-06	3.84293e-05	Significantly downregulated (Adj-P<0.01)
ENSG00000143033.17_MTF2	MTF2	0.291889	3.49719	4.66192	5.83651e-06	4.91598e-05	Significantly downregulated (Adj-P<0.01)
ENSG00000151365.2_THRSP	THRSP	1.17962	1.28262	4.5965	7.75509e-06	6.24379e-05	Significantly downregulated (Adj-P<0.01)
ENSG00000136040.8_PLXNC1	PLXNC1	0.716722	2.40171	4.61851	7.05005e-06	5.74018e-05	Significantly downregulated (Adj-P<0.01)
ENSG00000185432.11_METTL7A	METTL7A	0.586841	6.15226	4.68776	5.21272e-06	4.45438e-05	Significantly downregulated (Adj-P<0.01)
ENSG00000138092.10_CENPO	CENPO	-0.329033	1.83146	-4.62168	6.95373e-06	5.68801e-05	Significantly downregulated (Adj-P<0.01)
ENSG00000177034.15_MTX3	MTX3	0.297908	3.93417	4.6688	5.66373e-06	4.79079e-05	Significantly downregulated (Adj-P<0.01)
ENSG00000103707.9_MTFMT	MTFMT	-0.233671	2.6903	-4.64423	6.30468e-06	5.25337e-05	Significantly downregulated (Adj-P<0.01)
ENSG00000281026.1_N4BP2L2-IT2	N4BP2L2-IT2	0.525626	0.812557	4.58372	8.19489e-06	6.54149e-05	Significantly downregulated (Adj-P<0.01)
ENSG00000163482.11_STK36	STK36	0.287985	2.60627	4.63662	6.51684e-06	5.39176e-05	Significantly downregulated (Adj-P<0.01)
ENSG00000101972.18_STAG2	STAG2	0.310623	5.36016	4.68522	5.2711e-06	4.49459e-05	Significantly downregulated (Adj-P<0.01)
ENSG00000139154.14_AEBP2	AEBP2	-0.270059	3.43541	-4.66143	5.84898e-06	4.92126e-05	Significantly downregulated (Adj-P<0.01)
ENSG00000101577.9_LPIN2	LPIN2	0.57028	1.91947	4.60118	7.59971e-06	6.12801e-05	Significantly downregulated (Adj-P<0.01)
ENSG00000259366.1_AC108449.2	AC108449.2	1.06107	-1.07487	4.64388	6.31429e-06	5.25705e-05	Significantly downregulated (Adj-P<0.01)
ENSG00000112335.14_SNX3	SNX3	-0.191947	6.89669	-4.67811	5.43761e-06	4.62911e-05	Significantly downregulated (Adj-P<0.01)
ENSG00000073282.12_TP63	TP63	0.701424	4.35041	4.66825	5.67747e-06	4.79985e-05	Significantly downregulated (Adj-P<0.01)
ENSG00000120658.13_ENOX1	ENOX1	1.09968	0.179655	4.575	8.50894e-06	6.73462e-05	Significantly downregulated (Adj-P<0.01)
ENSG00000138468.15_SENP7	SENP7	0.367272	3.6566	4.65351	6.05466e-06	5.07818e-05	Significantly downregulated (Adj-P<0.01)
ENSG00000205056.8_LINC02397	LINC02397	1.25644	-1.0829	4.63468	6.57211e-06	5.43183e-05	Significantly downregulated (Adj-P<0.01)
ENSG00000092295.11_TGM1	TGM1	0.996573	-1.17192	4.60333	7.52919e-06	6.08042e-05	Significantly downregulated (Adj-P<0.01)
ENSG00000065989.15_PDE4A	PDE4A	-0.347867	5.38112	-4.67781	5.44491e-06	4.63036e-05	Significantly downregulated (Adj-P<0.01)
ENSG00000182263.13_FIGN	FIGN	0.668324	1.63964	4.58496	8.15139e-06	6.51332e-05	Significantly downregulated (Adj-P<0.01)
ENSG00000150750.7_C11orf53	C11orf53	-0.905523	-0.871396	-4.57232	8.60771e-06	6.79924e-05	Significantly downregulated (Adj-P<0.01)
ENSG00000198796.6_ALPK2	ALPK2	0.621882	6.52583	4.67597	5.489e-06	4.65787e-05	Significantly downregulated (Adj-P<0.01)
ENSG00000030419.16_IKZF2	IKZF2	0.544821	3.04662	4.62758	6.77809e-06	5.57595e-05	Significantly downregulated (Adj-P<0.01)
ENSG00000174106.2_LEMD3	LEMD3	0.289921	3.61867	4.64861	6.18546e-06	5.16865e-05	Significantly downregulated (Adj-P<0.01)
ENSG00000134480.14_CCNH	CCNH	-0.245014	3.25531	-4.64992	6.15012e-06	5.15008e-05	Significantly downregulated (Adj-P<0.01)
ENSG00000182224.11_CYB5D1	CYB5D1	-0.275875	2.97618	-4.63921	6.44383e-06	5.34827e-05	Significantly downregulated (Adj-P<0.01)
ENSG00000261308.2_FIGNL2	FIGNL2	-0.971874	-1.80032	-4.58783	8.05108e-06	6.44614e-05	Significantly downregulated (Adj-P<0.01)
ENSG00000185187.12_SIGIRR	SIGIRR	-0.520884	1.67841	-4.61159	7.26468e-06	5.89078e-05	Significantly downregulated (Adj-P<0.01)
ENSG00000163412.12_EIF4E3	EIF4E3	-0.285878	6.06378	-4.67269	5.5681e-06	4.71492e-05	Significantly downregulated (Adj-P<0.01)
ENSG00000144668.11_ITGA9	ITGA9	0.686041	3.08205	4.62441	6.87196e-06	5.63274e-05	Significantly downregulated (Adj-P<0.01)
ENSG00000061337.15_LZTS1	LZTS1	-0.622605	0.391894	-4.57286	8.58763e-06	6.78675e-05	Significantly downregulated (Adj-P<0.01)
ENSG00000175489.9_LRRC25	LRRC25	-0.725286	1.51192	-4.60582	7.44849e-06	6.02751e-05	Significantly downregulated (Adj-P<0.01)
ENSG00000237301.1_AL121992.1	AL121992.1	0.952026	-0.670753	4.58124	8.28307e-06	6.58579e-05	Significantly downregulated (Adj-P<0.01)
ENSG00000215421.9_ZNF407	ZNF407	0.277458	3.51055	4.64455	6.29575e-06	5.24987e-05	Significantly downregulated (Adj-P<0.01)
ENSG00000272010.1_AC100814.1	AC100814.1	-0.883914	-1.11763	-4.57412	8.54119e-06	6.75677e-05	Significantly downregulated (Adj-P<0.01)
ENSG00000198799.11_LRIG2	LRIG2	0.230488	4.38958	4.66318	5.80462e-06	4.89492e-05	Significantly downregulated (Adj-P<0.01)
ENSG00000072756.16_TRNT1	TRNT1	-0.301862	2.14054	-4.60728	7.40158e-06	5.9926e-05	Significantly downregulated (Adj-P<0.01)
ENSG00000170191.4_NANP	NANP	-0.385359	1.06541	-4.57944	8.34743e-06	6.62992e-05	Significantly downregulated (Adj-P<0.01)
ENSG00000126247.10_CAPNS1	CAPNS1	-0.209747	6.67211	-4.65975	5.89213e-06	4.95232e-05	Significantly downregulated (Adj-P<0.01)
ENSG00000148341.17_SH3GLB2	SH3GLB2	0.345247	5.26202	4.66537	5.74934e-06	4.85802e-05	Significantly downregulated (Adj-P<0.01)
ENSG00000198231.12_DDX42	DDX42	0.14176	6.0558	4.66337	5.79962e-06	4.89492e-05	Significantly downregulated (Adj-P<0.01)
ENSG00000155099.7_PIP4P2	PIP4P2	-0.445039	2.74433	-4.62377	6.89097e-06	5.64249e-05	Significantly downregulated (Adj-P<0.01)
ENSG00000112096.17_SOD2	SOD2	-0.341564	9.09769	-4.63792	6.48001e-06	5.36688e-05	Significantly downregulated (Adj-P<0.01)
ENSG00000108561.8_C1QBP	C1QBP	-0.19011	5.83898	-4.66268	5.81732e-06	4.90242e-05	Significantly downregulated (Adj-P<0.01)
ENSG00000179044.15_EXOC3L1	EXOC3L1	-0.763309	0.366461	-4.56125	9.02761e-06	7.06496e-05	Significantly downregulated (Adj-P<0.01)
ENSG00000143469.18_SYT14	SYT14	2.67942	-2.92446	4.95306	1.59142e-06	1.59112e-05	Significantly downregulated (Adj-P<0.01)
ENSG00000095370.19_SH2D3C	SH2D3C	-0.452767	2.8309	-4.62932	6.72705e-06	5.5397e-05	Significantly downregulated (Adj-P<0.01)
ENSG00000149743.13_TRPT1	TRPT1	-0.462793	5.13282	-4.66155	5.84599e-06	4.92126e-05	Significantly downregulated (Adj-P<0.01)
ENSG00000089486.16_CDIP1	CDIP1	-0.286535	4.41046	-4.65758	5.94817e-06	4.99678e-05	Significantly downregulated (Adj-P<0.01)
ENSG00000099889.13_ARVCF	ARVCF	0.499565	4.62691	4.6565	5.97616e-06	5.01763e-05	Significantly downregulated (Adj-P<0.01)
ENSG00000104812.14_GYS1	GYS1	-0.323754	8.37954	-4.63903	6.44891e-06	5.34827e-05	Significantly downregulated (Adj-P<0.01)
ENSG00000020922.12_MRE11	MRE11	0.2698	3.45614	4.62451	6.86905e-06	5.63274e-05	Significantly downregulated (Adj-P<0.01)
ENSG00000168398.6_BDKRB2	BDKRB2	1.66516	-1.47941	4.67716	5.46032e-06	4.64098e-05	Significantly downregulated (Adj-P<0.01)
ENSG00000283352.1_LINC00680-GUSBP4	LINC00680-GUSBP4	0.802089	-0.969791	4.56854	8.74877e-06	6.88667e-05	Significantly downregulated (Adj-P<0.01)
ENSG00000280660.1_AL157396.1	AL157396.1	2.54404	-1.93494	4.93359	1.73893e-06	1.72529e-05	Significantly downregulated (Adj-P<0.01)
ENSG00000115594.11_IL1R1	IL1R1	0.39086	3.27148	4.61494	7.15999e-06	5.81479e-05	Significantly downregulated (Adj-P<0.01)
ENSG00000138363.14_ATIC	ATIC	-0.36885	4.79963	-4.65086	6.125e-06	5.13175e-05	Significantly downregulated (Adj-P<0.01)
ENSG00000141012.12_GALNS	GALNS	-0.361019	1.8065	-4.58569	8.12568e-06	6.49605e-05	Significantly downregulated (Adj-P<0.01)
ENSG00000024422.11_EHD2	EHD2	-0.486434	4.67595	-4.64841	6.19083e-06	5.16865e-05	Significantly downregulated (Adj-P<0.01)
ENSG00000258441.1_LINC00641	LINC00641	0.476713	2.08	4.57504	8.50735e-06	6.73462e-05	Significantly downregulated (Adj-P<0.01)
ENSG00000231013.1_AC013275.1	AC013275.1	-2.11025	-1.97449	-4.55414	9.30755e-06	7.25103e-05	Significantly downregulated (Adj-P<0.01)
ENSG00000177311.11_ZBTB38	ZBTB38	0.373099	5.69354	4.64852	6.18788e-06	5.16865e-05	Significantly downregulated (Adj-P<0.01)
ENSG00000109654.14_TRIM2	TRIM2	0.411594	2.31145	4.57916	8.35753e-06	6.63131e-05	Significantly downregulated (Adj-P<0.01)
ENSG00000152409.8_JMY	JMY	0.349485	4.36296	4.63606	6.53284e-06	5.40218e-05	Significantly downregulated (Adj-P<0.01)
ENSG00000162409.10_PRKAA2	PRKAA2	0.440219	7.54971	4.63896	6.4508e-06	5.34827e-05	Significantly downregulated (Adj-P<0.01)
ENSG00000189144.13_ZNF573	ZNF573	0.591739	0.854363	4.5382	9.96559e-06	7.69945e-05	Significantly downregulated (Adj-P<0.01)
ENSG00000090863.11_GLG1	GLG1	0.286879	6.54428	4.64287	6.34198e-06	5.2748e-05	Significantly downregulated (Adj-P<0.01)
ENSG00000048540.14_LMO3	LMO3	2.61236	-1.9372	4.86625	2.3583e-06	2.25024e-05	Significantly downregulated (Adj-P<0.01)
ENSG00000140092.14_FBLN5	FBLN5	0.493961	3.79487	4.61968	7.01461e-06	5.71705e-05	Significantly downregulated (Adj-P<0.01)
ENSG00000072736.18_NFATC3	NFATC3	0.34064	5.27339	4.64286	6.34225e-06	5.2748e-05	Significantly downregulated (Adj-P<0.01)
ENSG00000116688.16_MFN2	MFN2	-0.313938	8.6747	-4.62073	6.98256e-06	5.69985e-05	Significantly downregulated (Adj-P<0.01)
ENSG00000183520.11_UTP11	UTP11	-0.301267	6.20251	-4.63664	6.51623e-06	5.39176e-05	Significantly downregulated (Adj-P<0.01)
ENSG00000137776.16_SLTM	SLTM	0.220231	5.85722	4.63923	6.44343e-06	5.34827e-05	Significantly downregulated (Adj-P<0.01)
ENSG00000267322.2_SNHG22	SNHG22	-0.735158	1.82666	-4.58188	8.26022e-06	6.57623e-05	Significantly downregulated (Adj-P<0.01)
ENSG00000189339.11_SLC35E2B	SLC35E2B	0.392589	5.96348	4.63814	6.47393e-06	5.36464e-05	Significantly downregulated (Adj-P<0.01)
ENSG00000099797.14_TECR	TECR	-0.307648	6.66743	-4.63177	6.6558e-06	5.48957e-05	Significantly downregulated (Adj-P<0.01)
ENSG00000160714.9_UBE2Q1	UBE2Q1	-0.169428	4.24084	-4.63101	6.67769e-06	5.5019e-05	Significantly downregulated (Adj-P<0.01)
ENSG00000185950.8_IRS2	IRS2	0.636001	4.58685	4.62561	6.83616e-06	5.61789e-05	Significantly downregulated (Adj-P<0.01)
ENSG00000128833.12_MYO5C	MYO5C	0.519019	2.18699	4.56122	9.02866e-06	7.06496e-05	Significantly downregulated (Adj-P<0.01)
ENSG00000093000.18_NUP50	NUP50	0.3123	3.5158	4.6042	7.50094e-06	6.06377e-05	Significantly downregulated (Adj-P<0.01)
ENSG00000160785.13_SLC25A44	SLC25A44	-0.227793	3.72939	-4.61956	7.01803e-06	5.71705e-05	Significantly downregulated (Adj-P<0.01)
ENSG00000197223.11_C1D	C1D	-0.225591	4.07286	-4.62479	6.8605e-06	5.63274e-05	Significantly downregulated (Adj-P<0.01)
ENSG00000110536.13_PTPMT1	PTPMT1	-0.234789	3.7623	-4.62097	6.97533e-06	5.69688e-05	Significantly downregulated (Adj-P<0.01)
ENSG00000133065.10_SLC41A1	SLC41A1	-0.493664	6.47859	-4.62832	6.75635e-06	5.56094e-05	Significantly downregulated (Adj-P<0.01)
ENSG00000109771.15_LRP2BP	LRP2BP	0.607292	1.37847	4.53562	1.00765e-05	7.76903e-05	Significantly downregulated (Adj-P<0.01)
ENSG00000155158.20_TTC39B	TTC39B	0.76293	1.70798	4.53682	1.00248e-05	7.73765e-05	Significantly downregulated (Adj-P<0.01)
ENSG00000131269.16_ABCB7	ABCB7	-0.232755	4.47536	-4.62744	6.78227e-06	5.5765e-05	Significantly downregulated (Adj-P<0.01)
ENSG00000132432.13_SEC61G	SEC61G	-0.366737	4.03211	-4.62405	6.88268e-06	5.63861e-05	Significantly downregulated (Adj-P<0.01)
ENSG00000105227.14_PRX	PRX	0.474567	3.201	4.59594	7.77369e-06	6.25559e-05	Significantly downregulated (Adj-P<0.01)
ENSG00000185269.11_NOTUM	NOTUM	0.840734	2.95682	4.58454	8.16618e-06	6.52186e-05	Significantly downregulated (Adj-P<0.01)
ENSG00000175193.13_PARL	PARL	-0.193701	4.34881	-4.62447	6.8702e-06	5.63274e-05	Significantly downregulated (Adj-P<0.01)
ENSG00000125414.18_MYH2	MYH2	-0.689879	14.3638	-4.55519	9.26549e-06	7.22535e-05	Significantly downregulated (Adj-P<0.01)
ENSG00000111666.10_CHPT1	CHPT1	-0.397201	3.61447	-4.61162	7.26375e-06	5.89078e-05	Significantly downregulated (Adj-P<0.01)
ENSG00000121989.14_ACVR2A	ACVR2A	0.332328	3.08348	4.58236	8.24312e-06	6.57623e-05	Significantly downregulated (Adj-P<0.01)
ENSG00000177556.11_ATOX1	ATOX1	-0.384445	1.91457	-4.56788	8.77356e-06	6.90277e-05	Significantly downregulated (Adj-P<0.01)
ENSG00000231365.5_AL359915.2	AL359915.2	0.458831	0.732478	4.51964	1.07889e-05	8.25119e-05	Significantly downregulated (Adj-P<0.01)
ENSG00000144230.16_GPR17	GPR17	-0.697578	1.64302	-4.56367	8.93386e-06	7.01151e-05	Significantly downregulated (Adj-P<0.01)
ENSG00000112651.11_MRPL2	MRPL2	-0.268371	4.93019	-4.62467	6.86431e-06	5.63274e-05	Significantly downregulated (Adj-P<0.01)
ENSG00000171606.17_ZNF274	ZNF274	0.394011	3.47218	4.59521	7.79847e-06	6.27236e-05	Significantly downregulated (Adj-P<0.01)
ENSG00000070731.10_ST6GALNAC2	ST6GALNAC2	-0.528215	3.2408	-4.59924	7.66368e-06	6.17332e-05	Significantly downregulated (Adj-P<0.01)
ENSG00000176454.13_LPCAT4	LPCAT4	0.385549	3.26188	4.59389	7.84299e-06	6.30178e-05	Significantly downregulated (Adj-P<0.01)
ENSG00000115233.11_PSMD14	PSMD14	-0.2226	5.25852	-4.62263	6.92528e-06	5.66766e-05	Significantly downregulated (Adj-P<0.01)
ENSG00000081923.13_ATP8B1	ATP8B1	0.585957	2.22033	4.54576	9.64792e-06	7.49432e-05	Significantly downregulated (Adj-P<0.01)
ENSG00000272831.1_AC027644.3	AC027644.3	-0.629663	-0.609936	-4.50901	1.12893e-05	8.57815e-05	Significantly downregulated (Adj-P<0.01)
ENSG00000198355.4_PIM3	PIM3	-0.417293	5.21419	-4.61998	7.00536e-06	5.71259e-05	Significantly downregulated (Adj-P<0.01)
ENSG00000137133.10_HINT2	HINT2	-0.335218	4.17823	-4.61525	7.15059e-06	5.81012e-05	Significantly downregulated (Adj-P<0.01)
ENSG00000197646.7_PDCD1LG2	PDCD1LG2	0.923299	-0.123656	4.51087	1.11999e-05	8.52451e-05	Significantly downregulated (Adj-P<0.01)
ENSG00000124006.14_OBSL1	OBSL1	0.363872	6.84573	4.61136	7.27196e-06	5.89367e-05	Significantly downregulated (Adj-P<0.01)
ENSG00000061794.12_MRPS35	MRPS35	-0.251424	5.4726	-4.61635	7.1164e-06	5.78531e-05	Significantly downregulated (Adj-P<0.01)
ENSG00000272140.2_AC022400.5	AC022400.5	0.690221	-0.693111	4.51786	1.08711e-05	8.30212e-05	Significantly downregulated (Adj-P<0.01)
[truncated: 2,657 more rows]

## Sheet: plaPRTvsY_sig
List of Differentially Expressed Genes between young and plaPRT at week 16
ENSEMBL ID	Hugo Gene Symbol	logFC	AveExpr	t	P.Value	adj.P.Val	group
ENSG00000173253.15_DMRT2	DMRT2	-1.73655	1.70407	-10.1752	9.68793e-20	1.53815e-15	Significantly downregulated (Adj-P<0.01)
ENSG00000197603.13_CPLANE1	CPLANE1	0.979087	2.72533	9.69596	2.32965e-18	1.35849e-14	Significantly upregulated (Adj-P<0.01)
ENSG00000163597.14_SNHG16	SNHG16	-0.695481	6.01866	-9.64613	3.23358e-18	1.35849e-14	Significantly downregulated (Adj-P<0.01)
ENSG00000171497.4_PPID	PPID	-0.47908	5.33958	-9.6375	3.42253e-18	1.35849e-14	Significantly downregulated (Adj-P<0.01)
ENSG00000149311.18_ATM	ATM	0.649749	4.30719	9.53361	6.76645e-18	1.55899e-14	Significantly upregulated (Adj-P<0.01)
ENSG00000082397.17_EPB41L3	EPB41L3	1.8775	2.76597	9.55987	5.69685e-18	1.55899e-14	Significantly upregulated (Adj-P<0.01)
ENSG00000148468.16_FAM171A1	FAM171A1	-1.19619	1.94812	-9.53122	6.87343e-18	1.55899e-14	Significantly downregulated (Adj-P<0.01)
ENSG00000003756.16_RBM5	RBM5	0.517206	6.58289	9.36612	2.0198e-17	4.00855e-14	Significantly upregulated (Adj-P<0.01)
ENSG00000134056.11_MRPS36	MRPS36	-0.60873	4.36543	-9.33039	2.54831e-17	4.4955e-14	Significantly downregulated (Adj-P<0.01)
ENSG00000085231.13_AK6	AK6	-0.477847	3.91037	-9.30075	3.08951e-17	4.90521e-14	Significantly downregulated (Adj-P<0.01)
ENSG00000176225.13_RTTN	RTTN	1.01356	3.26273	9.21838	5.2697e-17	7.6061e-14	Significantly upregulated (Adj-P<0.01)
ENSG00000261553.5_AL137782.1	AL137782.1	1.36933	3.4161	9.1997	5.94662e-17	7.86788e-14	Significantly upregulated (Adj-P<0.01)
ENSG00000244687.11_UBE2V1	UBE2V1	-0.442605	5.51936	-9.0429	1.63399e-16	1.92608e-13	Significantly downregulated (Adj-P<0.01)
ENSG00000114857.17_NKTR	NKTR	0.688128	6.06495	9.03689	1.69838e-16	1.92608e-13	Significantly upregulated (Adj-P<0.01)
ENSG00000075415.12_SLC25A3	SLC25A3	-0.574064	8.96621	-9.00799	2.04455e-16	2.16408e-13	Significantly downregulated (Adj-P<0.01)
ENSG00000174173.6_TRMT10C	TRMT10C	-0.505112	4.07066	-8.97104	2.59107e-16	2.57115e-13	Significantly downregulated (Adj-P<0.01)
ENSG00000170873.18_MTSS1	MTSS1	0.723772	5.07412	8.89302	4.26752e-16	3.98561e-13	Significantly upregulated (Adj-P<0.01)
ENSG00000158987.20_RAPGEF6	RAPGEF6	0.823026	2.82599	8.68904	1.55993e-15	1.37594e-12	Significantly upregulated (Adj-P<0.01)
ENSG00000102738.7_MRPS31	MRPS31	-0.536607	3.60954	-8.64818	2.01949e-15	1.52608e-12	Significantly downregulated (Adj-P<0.01)
ENSG00000005810.17_MYCBP2	MYCBP2	0.632084	4.95415	8.64868	2.01309e-15	1.52608e-12	Significantly upregulated (Adj-P<0.01)
ENSG00000118939.17_UCHL3	UCHL3	-0.836925	3.19686	-8.64088	2.11461e-15	1.52608e-12	Significantly downregulated (Adj-P<0.01)
ENSG00000141298.18_SSH2	SSH2	0.66519	6.73792	8.62176	2.38568e-15	1.64685e-12	Significantly upregulated (Adj-P<0.01)
ENSG00000172172.7_MRPL13	MRPL13	-0.582499	3.5401	-8.56679	3.37219e-15	2.23084e-12	Significantly downregulated (Adj-P<0.01)
ENSG00000198712.1_MT-CO2	MT-CO2	-1.07786	12.619	-8.55879	3.54606e-15	2.24307e-12	Significantly downregulated (Adj-P<0.01)
ENSG00000198899.2_MT-ATP6	MT-ATP6	-1.15511	12.9778	-8.55319	3.67323e-15	2.24307e-12	Significantly downregulated (Adj-P<0.01)
ENSG00000136521.12_NDUFB5	NDUFB5	-0.49204	6.8065	-8.52716	4.32526e-15	2.54341e-12	Significantly downregulated (Adj-P<0.01)
ENSG00000120438.11_TCP1	TCP1	-0.363749	6.47778	-8.51862	4.56325e-15	2.58753e-12	Significantly downregulated (Adj-P<0.01)
ENSG00000214944.9_ARHGEF28	ARHGEF28	1.49801	-0.136159	8.66345	1.83381e-15	1.52608e-12	Significantly upregulated (Adj-P<0.01)
ENSG00000131018.22_SYNE1	SYNE1	0.549596	6.26905	8.37884	1.09315e-14	5.7853e-12	Significantly upregulated (Adj-P<0.01)
ENSG00000135972.8_MRPS9	MRPS9	-0.494236	5.36535	-8.3723	1.13859e-14	5.83141e-12	Significantly downregulated (Adj-P<0.01)
ENSG00000198763.3_MT-ND2	MT-ND2	-1.22342	12.7624	-8.3354	1.43233e-14	6.89127e-12	Significantly downregulated (Adj-P<0.01)
ENSG00000257315.2_ZBED6	ZBED6	2.52359	3.63588	8.32192	1.55742e-14	7.27269e-12	Significantly upregulated (Adj-P<0.01)
ENSG00000147687.18_TATDN1	TATDN1	-0.50851	3.74514	-8.29569	1.83257e-14	8.31308e-12	Significantly downregulated (Adj-P<0.01)
ENSG00000137766.17_UNC13C	UNC13C	2.71161	2.98707	8.35487	1.26903e-14	6.29638e-12	Significantly upregulated (Adj-P<0.01)
ENSG00000228492.2_RAB11FIP1P1	RAB11FIP1P1	1.75451	0.208025	8.49432	5.31436e-15	2.90952e-12	Significantly upregulated (Adj-P<0.01)
ENSG00000147548.16_NSD3	NSD3	0.477183	4.74301	8.24106	2.57007e-14	1.13347e-11	Significantly upregulated (Adj-P<0.01)
ENSG00000101639.18_CEP192	CEP192	0.80182	3.31134	8.18161	3.70933e-14	1.54981e-11	Significantly upregulated (Adj-P<0.01)
ENSG00000112159.11_MDN1	MDN1	0.622351	5.82986	8.17183	3.93952e-14	1.60379e-11	Significantly upregulated (Adj-P<0.01)
ENSG00000154258.16_ABCA9	ABCA9	0.690824	3.92987	8.16379	4.13937e-14	1.64302e-11	Significantly upregulated (Adj-P<0.01)
ENSG00000185651.14_UBE2L3	UBE2L3	-0.297805	5.54398	-8.13136	5.05296e-14	1.95673e-11	Significantly downregulated (Adj-P<0.01)
ENSG00000213462.4_ERV3-1	ERV3-1	1.80897	0.877731	8.23594	2.65275e-14	1.13832e-11	Significantly upregulated (Adj-P<0.01)
ENSG00000173812.10_EIF1	EIF1	-0.421314	9.18121	-8.11224	5.68246e-14	2.10322e-11	Significantly downregulated (Adj-P<0.01)
ENSG00000070540.12_WIPI1	WIPI1	-0.690276	5.61658	-8.11185	5.6962e-14	2.10322e-11	Significantly downregulated (Adj-P<0.01)
ENSG00000114784.3_EIF1B	EIF1B	-0.409699	5.16761	-8.10422	5.96915e-14	2.15391e-11	Significantly downregulated (Adj-P<0.01)
ENSG00000082146.12_STRADB	STRADB	-0.615492	5.87692	-8.09048	6.49363e-14	2.2911e-11	Significantly downregulated (Adj-P<0.01)
ENSG00000172775.16_FAM192A	FAM192A	-0.305416	4.95935	-8.07831	6.99651e-14	2.41486e-11	Significantly downregulated (Adj-P<0.01)
ENSG00000172115.8_CYCS	CYCS	-0.717997	8.08549	-8.06593	7.54736e-14	2.54956e-11	Significantly downregulated (Adj-P<0.01)
ENSG00000171988.18_JMJD1C	JMJD1C	0.699004	4.80108	8.05865	7.8915e-14	2.61028e-11	Significantly upregulated (Adj-P<0.01)
ENSG00000184047.17_DIABLO	DIABLO	-0.353752	3.84715	-8.02939	9.43699e-14	3.05778e-11	Significantly downregulated (Adj-P<0.01)
ENSG00000108439.10_PNPO	PNPO	-0.392448	4.53668	-8.01675	1.01938e-13	3.23694e-11	Significantly downregulated (Adj-P<0.01)
ENSG00000111832.12_RWDD1	RWDD1	-0.493987	5.68347	-8.00462	1.09768e-13	3.41722e-11	Significantly downregulated (Adj-P<0.01)
ENSG00000179588.8_ZFPM1	ZFPM1	-0.879142	1.45174	-7.99825	1.14116e-13	3.41852e-11	Significantly downregulated (Adj-P<0.01)
ENSG00000009413.15_REV3L	REV3L	0.698113	4.44325	7.97831	1.28857e-13	3.7205e-11	Significantly upregulated (Adj-P<0.01)
ENSG00000198886.2_MT-ND4	MT-ND4	-1.11368	13.5709	-7.97828	1.28883e-13	3.7205e-11	Significantly downregulated (Adj-P<0.01)
ENSG00000173917.10_HOXB2	HOXB2	-1.04802	1.92176	-7.96576	1.39089e-13	3.94343e-11	Significantly downregulated (Adj-P<0.01)
ENSG00000095564.13_BTAF1	BTAF1	0.72243	4.37693	7.95242	1.5084e-13	4.20157e-11	Significantly upregulated (Adj-P<0.01)
ENSG00000213593.9_TMX2	TMX2	-0.45921	4.38963	-7.93808	1.64579e-13	4.38355e-11	Significantly downregulated (Adj-P<0.01)
ENSG00000129084.17_PSMA1	PSMA1	-0.383569	5.81034	-7.93764	1.65022e-13	4.38355e-11	Significantly downregulated (Adj-P<0.01)
ENSG00000197170.9_PSMD12	PSMD12	-0.43166	5.49855	-7.93701	1.65657e-13	4.38355e-11	Significantly downregulated (Adj-P<0.01)
ENSG00000083097.14_DOP1A	DOP1A	0.705195	4.12146	7.92133	1.82197e-13	4.74219e-11	Significantly upregulated (Adj-P<0.01)
ENSG00000143669.13_LYST	LYST	0.740773	2.64198	7.91607	1.8811e-13	4.81715e-11	Significantly upregulated (Adj-P<0.01)
ENSG00000005020.12_SKAP2	SKAP2	1.12584	3.48823	7.90107	2.06023e-13	5.19212e-11	Significantly upregulated (Adj-P<0.01)
ENSG00000165637.13_VDAC2	VDAC2	-0.413797	7.63311	-7.86366	2.58392e-13	6.41013e-11	Significantly downregulated (Adj-P<0.01)
ENSG00000248527.1_MTATP6P1	MTATP6P1	-1.21292	8.54447	-7.84057	2.97076e-13	7.23369e-11	Significantly downregulated (Adj-P<0.01)
ENSG00000243317.7_STMP1	STMP1	-0.516951	4.95515	-7.83856	3.00701e-13	7.23369e-11	Significantly downregulated (Adj-P<0.01)
ENSG00000228526.7_MIR34AHG	MIR34AHG	1.79629	0.337237	7.99943	1.13301e-13	3.41852e-11	Significantly upregulated (Adj-P<0.01)
ENSG00000211459.2_MT-RNR1	MT-RNR1	-1.22427	11.5237	-7.78095	4.25517e-13	1.00835e-10	Significantly downregulated (Adj-P<0.01)
ENSG00000115020.16_PIKFYVE	PIKFYVE	0.724078	4.33017	7.75907	4.85343e-13	1.1332e-10	Significantly upregulated (Adj-P<0.01)
ENSG00000125818.17_PSMF1	PSMF1	-0.353758	6.22316	-7.74576	5.25735e-13	1.20972e-10	Significantly downregulated (Adj-P<0.01)
ENSG00000147654.14_EBAG9	EBAG9	-0.472755	4.01149	-7.7352	5.60135e-13	1.27047e-10	Significantly downregulated (Adj-P<0.01)
ENSG00000101892.11_ATP1B4	ATP1B4	0.72351	6.4834	7.73218	5.70352e-13	1.27542e-10	Significantly upregulated (Adj-P<0.01)
ENSG00000160305.17_DIP2A	DIP2A	0.633299	4.84661	7.72823	5.84029e-13	1.28786e-10	Significantly upregulated (Adj-P<0.01)
ENSG00000165029.15_ABCA1	ABCA1	1.23654	4.88101	7.70434	6.73917e-13	1.46572e-10	Significantly upregulated (Adj-P<0.01)
ENSG00000137364.4_TPMT	TPMT	-0.443544	3.93476	-7.68214	7.69608e-13	1.64118e-10	Significantly downregulated (Adj-P<0.01)
ENSG00000073614.12_KDM5A	KDM5A	0.526385	4.05955	7.67868	7.85684e-13	1.64136e-10	Significantly upregulated (Adj-P<0.01)
ENSG00000165775.17_FUNDC2	FUNDC2	-0.385086	7.19412	-7.68092	7.75262e-13	1.64118e-10	Significantly downregulated (Adj-P<0.01)
ENSG00000237190.3_CDKN2AIPNL	CDKN2AIPNL	-0.440804	4.73732	-7.65946	8.81278e-13	1.79385e-10	Significantly downregulated (Adj-P<0.01)
ENSG00000135913.10_USP37	USP37	1.25839	3.04865	7.65373	9.11948e-13	1.83278e-10	Significantly upregulated (Adj-P<0.01)
ENSG00000144426.18_NBEAL1	NBEAL1	1.18708	1.94418	7.67557	8.00421e-13	1.65043e-10	Significantly upregulated (Adj-P<0.01)
ENSG00000219481.10_NBPF1	NBPF1	0.885741	3.9198	7.63998	9.89876e-13	1.94028e-10	Significantly upregulated (Adj-P<0.01)
ENSG00000197780.9_TAF13	TAF13	-0.518311	4.40543	-7.64017	9.88756e-13	1.94028e-10	Significantly downregulated (Adj-P<0.01)
ENSG00000078967.12_UBE2D4	UBE2D4	-0.39983	6.08622	-7.62766	1.0653e-12	2.06266e-10	Significantly downregulated (Adj-P<0.01)
ENSG00000022840.15_RNF10	RNF10	-0.393798	7.7687	-7.60941	1.18756e-12	2.27168e-10	Significantly downregulated (Adj-P<0.01)
ENSG00000023734.10_STRAP	STRAP	-0.381626	5.84887	-7.58283	1.39078e-12	2.62875e-10	Significantly downregulated (Adj-P<0.01)
ENSG00000177576.11_C18orf32	C18orf32	-0.436244	3.93451	-7.57403	1.4654e-12	2.73719e-10	Significantly downregulated (Adj-P<0.01)
ENSG00000141449.14_GREB1L	GREB1L	1.09981	3.72344	7.52635	1.94385e-12	3.58867e-10	Significantly upregulated (Adj-P<0.01)
ENSG00000178127.12_NDUFV2	NDUFV2	-0.448097	7.30791	-7.51412	2.0897e-12	3.81359e-10	Significantly downregulated (Adj-P<0.01)
ENSG00000198727.2_MT-CYB	MT-CYB	-0.950129	12.9843	-7.51082	2.13077e-12	3.84434e-10	Significantly downregulated (Adj-P<0.01)
ENSG00000173065.13_FAM222B	FAM222B	-0.572316	3.56282	-7.50777	2.16953e-12	3.87029e-10	Significantly downregulated (Adj-P<0.01)
ENSG00000180818.4_HOXC10	HOXC10	-0.485923	5.37655	-7.49586	2.32769e-12	4.1063e-10	Significantly downregulated (Adj-P<0.01)
ENSG00000170502.12_NUDT9	NUDT9	-0.343261	4.31491	-7.49234	2.37655e-12	4.14643e-10	Significantly downregulated (Adj-P<0.01)
ENSG00000198888.2_MT-ND1	MT-ND1	-0.924049	12.8875	-7.48071	2.54536e-12	4.39269e-10	Significantly downregulated (Adj-P<0.01)
ENSG00000198053.11_SIRPA	SIRPA	0.918778	3.15775	7.46531	2.78723e-12	4.75838e-10	Significantly upregulated (Adj-P<0.01)
ENSG00000130349.9_C6orf203	C6orf203	-0.472517	3.66918	-7.45958	2.88285e-12	4.86925e-10	Significantly downregulated (Adj-P<0.01)
ENSG00000177150.12_FAM210A	FAM210A	-0.594788	4.75988	-7.45212	3.01239e-12	4.98205e-10	Significantly downregulated (Adj-P<0.01)
ENSG00000184831.13_APOO	APOO	-0.587312	3.67899	-7.4448	3.14499e-12	5.14774e-10	Significantly downregulated (Adj-P<0.01)
ENSG00000119812.18_FAM98A	FAM98A	-0.380314	5.28873	-7.43155	3.39965e-12	5.4853e-10	Significantly downregulated (Adj-P<0.01)
ENSG00000185722.17_ANKFY1	ANKFY1	0.616131	5.15868	7.43052	3.42032e-12	5.4853e-10	Significantly upregulated (Adj-P<0.01)
ENSG00000163528.12_CHCHD4	CHCHD4	-0.503854	3.60777	-7.42334	3.56782e-12	5.66464e-10	Significantly downregulated (Adj-P<0.01)
ENSG00000230148.8_HOXB-AS1	HOXB-AS1	-1.14695	0.0423155	-7.45648	2.93602e-12	4.90687e-10	Significantly downregulated (Adj-P<0.01)
ENSG00000136522.13_MRPL47	MRPL47	-0.537538	3.85737	-7.40591	3.95218e-12	6.15184e-10	Significantly downregulated (Adj-P<0.01)
ENSG00000218739.9_CEBPZOS	CEBPZOS	-0.468639	5.52505	-7.40897	3.88192e-12	6.10231e-10	Significantly downregulated (Adj-P<0.01)
ENSG00000151247.12_EIF4E	EIF4E	-0.401588	4.36264	-7.39636	4.1798e-12	6.44298e-10	Significantly downregulated (Adj-P<0.01)
ENSG00000269604.1_AC005523.2	AC005523.2	-0.462678	9.08555	-7.38864	4.37336e-12	6.67652e-10	Significantly downregulated (Adj-P<0.01)
ENSG00000122033.14_MTIF3	MTIF3	-0.43764	4.81793	-7.36184	5.11622e-12	7.66323e-10	Significantly downregulated (Adj-P<0.01)
ENSG00000104131.12_EIF3J	EIF3J	-0.441917	6.7202	-7.35987	5.17538e-12	7.67939e-10	Significantly downregulated (Adj-P<0.01)
ENSG00000174227.15_PIGG	PIGG	0.446055	3.93992	7.34001	5.81236e-12	8.54471e-10	Significantly upregulated (Adj-P<0.01)
ENSG00000130347.12_RTN4IP1	RTN4IP1	-0.623812	3.19103	-7.31828	6.59813e-12	9.61087e-10	Significantly downregulated (Adj-P<0.01)
ENSG00000165629.19_ATP5F1C	ATP5F1C	-0.592896	7.39301	-7.31301	6.80396e-12	9.82059e-10	Significantly downregulated (Adj-P<0.01)
ENSG00000030066.13_NUP160	NUP160	0.495545	3.91886	7.29978	7.34883e-12	1.05115e-09	Significantly upregulated (Adj-P<0.01)
ENSG00000228794.8_LINC01128	LINC01128	-0.788799	5.83432	-7.29574	7.52367e-12	1.06655e-09	Significantly downregulated (Adj-P<0.01)
ENSG00000130037.4_KCNA5	KCNA5	-1.031	1.3224	-7.28896	7.82647e-12	1.09965e-09	Significantly downregulated (Adj-P<0.01)
ENSG00000108010.11_GLRX3	GLRX3	-0.379564	4.1999	-7.2836	8.07453e-12	1.11478e-09	Significantly downregulated (Adj-P<0.01)
ENSG00000137693.13_YAP1	YAP1	0.641057	6.44159	7.2842	8.04636e-12	1.11478e-09	Significantly upregulated (Adj-P<0.01)
ENSG00000136457.9_CHAD	CHAD	1.35068	2.14886	7.27258	8.60888e-12	1.17479e-09	Significantly upregulated (Adj-P<0.01)
ENSG00000153130.17_SCOC	SCOC	-0.48628	4.71202	-7.27161	8.65723e-12	1.17479e-09	Significantly downregulated (Adj-P<0.01)
ENSG00000163071.10_SPATA18	SPATA18	1.70788	0.505117	7.38243	4.53544e-12	6.85801e-10	Significantly upregulated (Adj-P<0.01)
ENSG00000168288.12_MMADHC	MMADHC	-0.423282	6.25406	-7.25932	9.29759e-12	1.251e-09	Significantly downregulated (Adj-P<0.01)
ENSG00000163960.11_UBXN7	UBXN7	0.608223	4.34372	7.24156	1.03069e-11	1.3679e-09	Significantly upregulated (Adj-P<0.01)
ENSG00000162600.11_OMA1	OMA1	-0.409963	3.84133	-7.21359	1.2119e-11	1.57716e-09	Significantly downregulated (Adj-P<0.01)
ENSG00000163872.15_YEATS2	YEATS2	0.488592	3.26925	7.20578	1.2679e-11	1.62343e-09	Significantly upregulated (Adj-P<0.01)
ENSG00000102897.9_LYRM1	LYRM1	-0.368965	4.05096	-7.20789	1.25255e-11	1.61681e-09	Significantly downregulated (Adj-P<0.01)
ENSG00000197535.14_MYO5A	MYO5A	0.653974	3.63951	7.20219	1.29453e-11	1.64426e-09	Significantly upregulated (Adj-P<0.01)
ENSG00000248923.1_MTND5P11	MTND5P11	-1.13309	0.50569	-7.24103	1.03387e-11	1.3679e-09	Significantly downregulated (Adj-P<0.01)
ENSG00000075539.14_FRYL	FRYL	0.513348	3.84024	7.19533	1.34687e-11	1.6838e-09	Significantly upregulated (Adj-P<0.01)
ENSG00000178982.9_EIF3K	EIF3K	-0.439069	7.17018	-7.19822	1.32454e-11	1.66902e-09	Significantly downregulated (Adj-P<0.01)
ENSG00000101596.15_SMCHD1	SMCHD1	0.608936	4.63711	7.17046	1.55472e-11	1.92846e-09	Significantly upregulated (Adj-P<0.01)
ENSG00000106554.12_CHCHD3	CHCHD3	-0.591957	7.17065	-7.16426	1.61138e-11	1.96799e-09	Significantly downregulated (Adj-P<0.01)
ENSG00000120008.15_WDR11	WDR11	0.492499	4.00867	7.16214	1.63112e-11	1.97689e-09	Significantly upregulated (Adj-P<0.01)
ENSG00000153485.5_TMEM251	TMEM251	-0.518946	2.6775	-7.15126	1.73664e-11	2.07313e-09	Significantly downregulated (Adj-P<0.01)
ENSG00000276045.3_ORAI1	ORAI1	-0.620896	4.7739	-7.16008	1.65064e-11	1.9854e-09	Significantly downregulated (Adj-P<0.01)
ENSG00000188906.15_LRRK2	LRRK2	0.88409	3.77666	7.1411	1.84128e-11	2.16272e-09	Significantly upregulated (Adj-P<0.01)
ENSG00000035141.7_FAM136A	FAM136A	-0.562652	3.94104	-7.14659	1.784e-11	2.11378e-09	Significantly downregulated (Adj-P<0.01)
ENSG00000198938.2_MT-CO3	MT-CO3	-0.948164	13.4887	-7.13876	1.86617e-11	2.16272e-09	Significantly downregulated (Adj-P<0.01)
ENSG00000168958.19_MFF	MFF	-0.356108	5.26405	-7.13878	1.86596e-11	2.16272e-09	Significantly downregulated (Adj-P<0.01)
ENSG00000126091.20_ST3GAL3	ST3GAL3	-0.461464	5.76314	-7.12703	1.99639e-11	2.28386e-09	Significantly downregulated (Adj-P<0.01)
ENSG00000175193.13_PARL	PARL	-0.333874	4.34881	-7.12195	2.05551e-11	2.33109e-09	Significantly downregulated (Adj-P<0.01)
ENSG00000165280.15_VCP	VCP	-0.325164	7.88456	-7.11595	2.12758e-11	2.39572e-09	Significantly downregulated (Adj-P<0.01)
ENSG00000147231.13_CXorf57	CXorf57	1.11051	1.93865	7.12676	1.99947e-11	2.28386e-09	Significantly upregulated (Adj-P<0.01)
ENSG00000165138.17_ANKS6	ANKS6	0.43433	2.83235	7.09991	2.33272e-11	2.58997e-09	Significantly upregulated (Adj-P<0.01)
ENSG00000277209.1_RPPH1	RPPH1	-1.73121	-1.3857	-7.16692	1.58685e-11	1.95306e-09	Significantly downregulated (Adj-P<0.01)
ENSG00000175556.16_LONRF3	LONRF3	1.13441	1.72495	7.11243	2.17103e-11	2.42742e-09	Significantly upregulated (Adj-P<0.01)
ENSG00000189350.12_TOGARAM2	TOGARAM2	-1.8568	1.8979	-7.07948	2.62256e-11	2.8134e-09	Significantly downregulated (Adj-P<0.01)
ENSG00000036672.15_USP2	USP2	-0.456213	6.39065	-7.08864	2.48854e-11	2.74379e-09	Significantly downregulated (Adj-P<0.01)
ENSG00000113240.12_CLK4	CLK4	0.534032	5.29694	7.08727	2.50815e-11	2.74633e-09	Significantly upregulated (Adj-P<0.01)
ENSG00000116127.17_ALMS1	ALMS1	0.705537	1.70223	7.08451	2.54805e-11	2.77092e-09	Significantly upregulated (Adj-P<0.01)
ENSG00000187446.11_CHP1	CHP1	-0.585125	5.74034	-7.08239	2.57924e-11	2.78575e-09	Significantly downregulated (Adj-P<0.01)
ENSG00000139233.6_LLPH	LLPH	-0.316455	3.7949	-7.06998	2.76903e-11	2.9506e-09	Significantly downregulated (Adj-P<0.01)
ENSG00000124570.19_SERPINB6	SERPINB6	-0.39578	5.93174	-7.06612	2.83086e-11	2.99637e-09	Significantly downregulated (Adj-P<0.01)
ENSG00000184226.14_PCDH9	PCDH9	1.30259	2.53327	7.05754	2.97331e-11	3.11268e-09	Significantly upregulated (Adj-P<0.01)
ENSG00000119048.7_UBE2B	UBE2B	-0.416903	7.05807	-7.05715	2.97995e-11	3.11268e-09	Significantly downregulated (Adj-P<0.01)
ENSG00000163634.11_THOC7	THOC7	-0.356203	4.68821	-7.0504	3.09721e-11	3.21402e-09	Significantly downregulated (Adj-P<0.01)
ENSG00000247828.7_TMEM161B-AS1	TMEM161B-AS1	-0.750072	2.27039	-7.02941	3.49148e-11	3.57749e-09	Significantly downregulated (Adj-P<0.01)
ENSG00000164938.13_TP53INP1	TP53INP1	0.696465	3.81133	7.02935	3.49255e-11	3.57749e-09	Significantly upregulated (Adj-P<0.01)
ENSG00000107020.9_PLGRKT	PLGRKT	-0.490569	3.76516	-7.02101	3.66261e-11	3.70802e-09	Significantly downregulated (Adj-P<0.01)
ENSG00000132963.7_POMP	POMP	-0.367141	5.79008	-7.02043	3.67478e-11	3.70802e-09	Significantly downregulated (Adj-P<0.01)
ENSG00000110442.11_COMMD9	COMMD9	-0.36012	4.44818	-7.01832	3.71934e-11	3.71396e-09	Significantly downregulated (Adj-P<0.01)
ENSG00000178741.11_COX5A	COX5A	-0.552353	7.68747	-7.00525	4.0068e-11	3.976e-09	Significantly downregulated (Adj-P<0.01)
ENSG00000171202.6_TMEM126A	TMEM126A	-0.5213	4.081	-6.99189	4.32328e-11	4.26339e-09	Significantly downregulated (Adj-P<0.01)
ENSG00000204271.12_SPIN3	SPIN3	0.637132	2.24407	6.98226	4.5665e-11	4.47546e-09	Significantly upregulated (Adj-P<0.01)
ENSG00000165389.6_SPTSSA	SPTSSA	-0.522534	3.72454	-6.97382	4.79082e-11	4.60993e-09	Significantly downregulated (Adj-P<0.01)
ENSG00000143702.15_CEP170	CEP170	0.71708	5.03101	6.97502	4.75823e-11	4.60993e-09	Significantly upregulated (Adj-P<0.01)
ENSG00000104517.12_UBR5	UBR5	0.513852	5.75882	6.97451	4.77199e-11	4.60993e-09	Significantly upregulated (Adj-P<0.01)
ENSG00000257093.6_KIAA1147	KIAA1147	0.585058	3.8367	6.9658	5.01379e-11	4.7667e-09	Significantly upregulated (Adj-P<0.01)
ENSG00000134884.14_ARGLU1	ARGLU1	0.411914	6.42711	6.96908	4.92152e-11	4.70717e-09	Significantly upregulated (Adj-P<0.01)
ENSG00000123178.14_SPRYD7	SPRYD7	-0.399986	4.4765	-6.959	5.21096e-11	4.92467e-09	Significantly downregulated (Adj-P<0.01)
ENSG00000141385.9_AFG3L2	AFG3L2	-0.370239	6.93724	-6.95671	5.27932e-11	4.95975e-09	Significantly downregulated (Adj-P<0.01)
ENSG00000140905.10_GCSH	GCSH	-0.52516	4.9642	-6.94956	5.49764e-11	5.10445e-09	Significantly downregulated (Adj-P<0.01)
ENSG00000111530.12_CAND1	CAND1	0.436526	4.76222	6.93771	5.87925e-11	5.42703e-09	Significantly upregulated (Adj-P<0.01)
ENSG00000104177.17_MYEF2	MYEF2	1.47995	0.505559	7.0197	3.69004e-11	3.70802e-09	Significantly upregulated (Adj-P<0.01)
ENSG00000137504.13_CREBZF	CREBZF	0.482241	5.50238	6.93186	6.0772e-11	5.57732e-09	Significantly upregulated (Adj-P<0.01)
ENSG00000023572.9_GLRX2	GLRX2	-0.47115	4.36387	-6.92303	6.38842e-11	5.82925e-09	Significantly downregulated (Adj-P<0.01)
ENSG00000116652.6_DLEU2L	DLEU2L	2.78338	0.223125	7.2203	1.16577e-11	1.52967e-09	Significantly upregulated (Adj-P<0.01)
ENSG00000128881.16_TTBK2	TTBK2	0.507966	4.85243	6.9059	7.03817e-11	6.38543e-09	Significantly upregulated (Adj-P<0.01)
ENSG00000108666.9_C17orf75	C17orf75	-0.420795	3.85206	-6.88844	7.76675e-11	6.92768e-09	Significantly downregulated (Adj-P<0.01)
ENSG00000106028.10_SSBP1	SSBP1	-0.344553	4.54931	-6.88948	7.72138e-11	6.92612e-09	Significantly downregulated (Adj-P<0.01)
ENSG00000109689.15_STIM2	STIM2	0.536618	3.19029	6.86573	8.82702e-11	7.82942e-09	Significantly upregulated (Adj-P<0.01)
ENSG00000164120.13_HPGD	HPGD	1.988	0.776376	6.94971	5.49282e-11	5.10445e-09	Significantly upregulated (Adj-P<0.01)
ENSG00000166503.8_HDGFL3	HDGFL3	0.731409	3.43299	6.85768	9.23606e-11	7.92758e-09	Significantly upregulated (Adj-P<0.01)
ENSG00000166902.4_MRPL16	MRPL16	-0.395293	4.9202	-6.86423	8.9019e-11	7.85197e-09	Significantly downregulated (Adj-P<0.01)
ENSG00000169919.16_GUSB	GUSB	0.411359	3.71973	6.85742	9.2495e-11	7.92758e-09	Significantly upregulated (Adj-P<0.01)
ENSG00000175348.10_TMEM9B	TMEM9B	-0.330363	4.4964	-6.8613	9.04963e-11	7.92758e-09	Significantly downregulated (Adj-P<0.01)
ENSG00000259976.3_AC093010.3	AC093010.3	0.794441	5.75844	6.85942	9.14582e-11	7.92758e-09	Significantly upregulated (Adj-P<0.01)
ENSG00000109180.14_OCIAD1	OCIAD1	-0.38777	6.26172	-6.8567	9.28721e-11	7.92758e-09	Significantly downregulated (Adj-P<0.01)
ENSG00000181061.13_HIGD1A	HIGD1A	-0.508111	6.34321	-6.85144	9.56607e-11	8.12195e-09	Significantly downregulated (Adj-P<0.01)
ENSG00000254772.9_EEF1G	EEF1G	-0.37867	10.4724	-6.82072	1.13669e-10	9.54876e-09	Significantly downregulated (Adj-P<0.01)
ENSG00000155115.6_GTF3C6	GTF3C6	-0.425265	5.61796	-6.82822	1.08984e-10	9.20393e-09	Significantly downregulated (Adj-P<0.01)
ENSG00000147162.13_OGT	OGT	0.577227	7.29219	6.81184	1.1947e-10	9.93106e-09	Significantly upregulated (Adj-P<0.01)
ENSG00000135070.14_ISCA1	ISCA1	-0.412133	5.9706	-6.81259	1.18967e-10	9.93106e-09	Significantly downregulated (Adj-P<0.01)
ENSG00000147256.11_ARHGAP36	ARHGAP36	2.97836	1.68961	6.85977	9.12799e-11	7.92758e-09	Significantly upregulated (Adj-P<0.01)
ENSG00000244306.11_DUXAP10	DUXAP10	1.86315	0.602638	6.89445	7.50773e-11	6.77274e-09	Significantly upregulated (Adj-P<0.01)
ENSG00000188153.13_COL4A5	COL4A5	0.640999	4.03645	6.79479	1.31435e-10	1.08688e-08	Significantly upregulated (Adj-P<0.01)
ENSG00000177932.6_ZNF354C	ZNF354C	0.715189	2.13672	6.78176	1.41373e-10	1.13592e-08	Significantly upregulated (Adj-P<0.01)
ENSG00000197498.12_RPF2	RPF2	-0.377344	4.21473	-6.79125	1.34065e-10	1.10288e-08	Significantly downregulated (Adj-P<0.01)
ENSG00000100478.14_AP4S1	AP4S1	-0.406487	2.95844	-6.7805	1.42374e-10	1.13592e-08	Significantly downregulated (Adj-P<0.01)
ENSG00000100418.7_DESI1	DESI1	-0.366418	4.072	-6.78706	1.37248e-10	1.11748e-08	Significantly downregulated (Adj-P<0.01)
ENSG00000007923.15_DNAJC11	DNAJC11	-0.322708	5.21852	-6.79024	1.34828e-10	1.10344e-08	Significantly downregulated (Adj-P<0.01)
ENSG00000164506.14_STXBP5	STXBP5	0.614779	4.52705	6.78091	1.42046e-10	1.13592e-08	Significantly upregulated (Adj-P<0.01)
ENSG00000174485.15_DENND4A	DENND4A	0.597347	3.76414	6.775	1.4681e-10	1.16545e-08	Significantly upregulated (Adj-P<0.01)
ENSG00000126773.12_PCNX4	PCNX4	0.561115	4.68835	6.78133	1.41712e-10	1.13592e-08	Significantly upregulated (Adj-P<0.01)
ENSG00000102554.13_KLF5	KLF5	1.1202	3.31625	6.74717	1.71473e-10	1.33455e-08	Significantly upregulated (Adj-P<0.01)
ENSG00000198743.6_SLC5A3	SLC5A3	1.09222	1.95569	6.75287	1.66112e-10	1.31212e-08	Significantly upregulated (Adj-P<0.01)
ENSG00000140043.11_PTGR2	PTGR2	-0.464949	5.09086	-6.75109	1.6777e-10	1.31866e-08	Significantly downregulated (Adj-P<0.01)
ENSG00000109919.9_MTCH2	MTCH2	-0.394941	5.55494	-6.74757	1.71092e-10	1.33455e-08	Significantly downregulated (Adj-P<0.01)
ENSG00000224934.4_AL391684.1	AL391684.1	0.78417	3.15133	6.73237	1.86209e-10	1.42823e-08	Significantly upregulated (Adj-P<0.01)
ENSG00000156261.12_CCT8	CCT8	-0.314463	6.17778	-6.745	1.73558e-10	1.34418e-08	Significantly downregulated (Adj-P<0.01)
ENSG00000167434.9_CA4	CA4	-0.853407	2.3905	-6.72471	1.94313e-10	1.48323e-08	Significantly downregulated (Adj-P<0.01)
ENSG00000133983.14_COX16	COX16	-0.384396	4.64669	-6.73647	1.82004e-10	1.40276e-08	Significantly downregulated (Adj-P<0.01)
ENSG00000140470.13_ADAMTS17	ADAMTS17	1.0694	1.14079	6.7226	1.96609e-10	1.49357e-08	Significantly upregulated (Adj-P<0.01)
ENSG00000107077.18_KDM4C	KDM4C	0.377969	2.70592	6.70035	2.22481e-10	1.66861e-08	Significantly upregulated (Adj-P<0.01)
ENSG00000115760.14_BIRC6	BIRC6	0.518177	5.35034	6.70688	2.14564e-10	1.62221e-08	Significantly upregulated (Adj-P<0.01)
ENSG00000079785.14_DDX1	DDX1	-0.277226	6.87736	-6.70009	2.22803e-10	1.66861e-08	Significantly downregulated (Adj-P<0.01)
ENSG00000250479.8_CHCHD10	CHCHD10	-0.689967	7.10096	-6.69422	2.30175e-10	1.70771e-08	Significantly downregulated (Adj-P<0.01)
ENSG00000061794.12_MRPS35	MRPS35	-0.406938	5.4726	-6.69726	2.26327e-10	1.68704e-08	Significantly downregulated (Adj-P<0.01)
ENSG00000158019.20_BABAM2	BABAM2	-0.38387	4.2264	-6.68826	2.3791e-10	1.75688e-08	Significantly downregulated (Adj-P<0.01)
ENSG00000109323.9_MANBA	MANBA	0.581579	2.49879	6.67238	2.598e-10	1.88349e-08	Significantly upregulated (Adj-P<0.01)
ENSG00000078804.12_TP53INP2	TP53INP2	-0.769469	5.58861	-6.68518	2.42016e-10	1.77893e-08	Significantly downregulated (Adj-P<0.01)
ENSG00000120705.12_ETF1	ETF1	-0.366036	5.8606	-6.67975	2.49397e-10	1.82473e-08	Significantly downregulated (Adj-P<0.01)
ENSG00000168209.4_DDIT4	DDIT4	1.2888	5.35382	6.67512	2.5588e-10	1.86358e-08	Significantly upregulated (Adj-P<0.01)
ENSG00000163482.11_STK36	STK36	0.453251	2.60627	6.65589	2.84618e-10	2.04474e-08	Significantly upregulated (Adj-P<0.01)
ENSG00000136247.14_ZDHHC4	ZDHHC4	-0.339908	4.54712	-6.66909	2.64565e-10	1.90932e-08	Significantly downregulated (Adj-P<0.01)
ENSG00000269934.1_AL353593.2	AL353593.2	-1.02038	1.79618	-6.6385	3.13312e-10	2.18178e-08	Significantly downregulated (Adj-P<0.01)
ENSG00000181789.14_COPG1	COPG1	-0.280311	4.85637	-6.64673	2.99385e-10	2.13553e-08	Significantly downregulated (Adj-P<0.01)
ENSG00000137714.2_FDX1	FDX1	-0.387127	4.70897	-6.64559	3.0129e-10	2.13553e-08	Significantly downregulated (Adj-P<0.01)
ENSG00000122873.11_CISD1	CISD1	-0.437719	5.40569	-6.64562	3.01228e-10	2.13553e-08	Significantly downregulated (Adj-P<0.01)
ENSG00000065518.7_NDUFB4	NDUFB4	-0.432727	7.10711	-6.6386	3.13146e-10	2.18178e-08	Significantly downregulated (Adj-P<0.01)
ENSG00000085760.14_MTIF2	MTIF2	-0.45888	5.10909	-6.64187	3.07539e-10	2.17013e-08	Significantly downregulated (Adj-P<0.01)
ENSG00000151835.15_SACS	SACS	0.647429	5.56159	6.6399	3.10897e-10	2.18178e-08	Significantly upregulated (Adj-P<0.01)
ENSG00000169021.5_UQCRFS1	UQCRFS1	-0.528986	8.05351	-6.62594	3.35801e-10	2.32817e-08	Significantly downregulated (Adj-P<0.01)
ENSG00000128585.17_MKLN1	MKLN1	0.606201	4.40633	6.62212	3.42935e-10	2.34688e-08	Significantly upregulated (Adj-P<0.01)
ENSG00000125676.19_THOC2	THOC2	0.356933	4.65429	6.62423	3.38967e-10	2.32978e-08	Significantly upregulated (Adj-P<0.01)
ENSG00000168256.17_NKIRAS2	NKIRAS2	-0.282571	4.81441	-6.62449	3.38483e-10	2.32978e-08	Significantly downregulated (Adj-P<0.01)
ENSG00000163636.10_PSMD6	PSMD6	-0.248946	5.68504	-6.61671	3.53312e-10	2.40753e-08	Significantly downregulated (Adj-P<0.01)
ENSG00000124762.13_CDKN1A	CDKN1A	2.55532	3.03525	6.59579	3.96441e-10	2.65582e-08	Significantly upregulated (Adj-P<0.01)
ENSG00000240303.7_ACAD11	ACAD11	0.417555	3.87134	6.60083	3.85608e-10	2.60524e-08	Significantly upregulated (Adj-P<0.01)
ENSG00000165617.14_DACT1	DACT1	1.84764	1.47201	6.61409	3.58462e-10	2.43218e-08	Significantly upregulated (Adj-P<0.01)
ENSG00000270231.3_NBPF8	NBPF8	0.655944	2.43373	6.57874	4.35382e-10	2.84468e-08	Significantly upregulated (Adj-P<0.01)
ENSG00000108788.11_MLX	MLX	-0.310412	5.4047	-6.59722	3.93336e-10	2.64618e-08	Significantly downregulated (Adj-P<0.01)
ENSG00000183605.16_SFXN4	SFXN4	-0.499981	4.3121	-6.59053	4.0808e-10	2.72231e-08	Significantly downregulated (Adj-P<0.01)
ENSG00000128654.13_MTX2	MTX2	-0.400752	4.82344	-6.5875	4.14925e-10	2.75639e-08	Significantly downregulated (Adj-P<0.01)
ENSG00000047410.13_TPR	TPR	0.414669	5.72768	6.58669	4.16781e-10	2.75718e-08	Significantly upregulated (Adj-P<0.01)
ENSG00000269890.1_AL353593.1	AL353593.1	-1.01819	4.52789	-6.5818	4.28114e-10	2.8204e-08	Significantly downregulated (Adj-P<0.01)
ENSG00000277027.1_RMRP	RMRP	-1.42956	-1.19977	-6.56481	4.69975e-10	3.04563e-08	Significantly downregulated (Adj-P<0.01)
ENSG00000100697.14_DICER1	DICER1	0.588626	5.6395	6.57403	4.46773e-10	2.90714e-08	Significantly upregulated (Adj-P<0.01)
ENSG00000213585.10_VDAC1	VDAC1	-0.377408	8.90015	-6.56228	4.76544e-10	3.06061e-08	Significantly downregulated (Adj-P<0.01)
ENSG00000145147.19_SLIT2	SLIT2	1.05131	2.71555	6.55072	5.07692e-10	3.22425e-08	Significantly upregulated (Adj-P<0.01)
ENSG00000138442.9_WDR12	WDR12	-0.39764	4.08176	-6.56385	4.72453e-10	3.04924e-08	Significantly downregulated (Adj-P<0.01)
ENSG00000013441.15_CLK1	CLK1	0.572142	6.69593	6.56169	4.7807e-10	3.06061e-08	Significantly upregulated (Adj-P<0.01)
ENSG00000075785.12_RAB7A	RAB7A	-0.227278	7.50357	-6.55647	4.91961e-10	3.13689e-08	Significantly downregulated (Adj-P<0.01)
ENSG00000127527.13_EPS15L1	EPS15L1	-0.501437	5.29517	-6.54741	5.16975e-10	3.27012e-08	Significantly downregulated (Adj-P<0.01)
ENSG00000173611.17_SCAI	SCAI	0.701568	3.48038	6.53109	5.65256e-10	3.5333e-08	Significantly upregulated (Adj-P<0.01)
ENSG00000203705.10_TATDN3	TATDN3	-0.444892	3.99152	-6.54022	5.37737e-10	3.37456e-08	Significantly downregulated (Adj-P<0.01)
ENSG00000168259.14_DNAJC7	DNAJC7	-0.350401	5.57638	-6.54053	5.36811e-10	3.37456e-08	Significantly downregulated (Adj-P<0.01)
ENSG00000134574.11_DDB2	DDB2	0.577994	2.55116	6.50384	6.55973e-10	4.03479e-08	Significantly upregulated (Adj-P<0.01)
ENSG00000116473.14_RAP1A	RAP1A	-0.337506	5.52933	-6.51821	6.06481e-10	3.76137e-08	Significantly downregulated (Adj-P<0.01)
ENSG00000168807.16_SNTB2	SNTB2	0.649973	4.04278	6.50322	6.58191e-10	4.03479e-08	Significantly upregulated (Adj-P<0.01)
ENSG00000129566.12_TEP1	TEP1	0.640666	4.85537	6.50758	6.42701e-10	3.97049e-08	Significantly upregulated (Adj-P<0.01)
ENSG00000132436.11_FIGNL1	FIGNL1	0.561921	2.64686	6.48687	7.19531e-10	4.31094e-08	Significantly upregulated (Adj-P<0.01)
ENSG00000137145.20_DENND4C	DENND4C	0.648002	3.9267	6.49125	7.02573e-10	4.22528e-08	Significantly upregulated (Adj-P<0.01)
ENSG00000163541.11_SUCLG1	SUCLG1	-0.441296	6.53815	-6.49719	6.80175e-10	4.15351e-08	Significantly downregulated (Adj-P<0.01)
ENSG00000134905.16_CARS2	CARS2	-0.379426	5.4084	-6.49507	6.88067e-10	4.18037e-08	Significantly downregulated (Adj-P<0.01)
ENSG00000162073.13_PAQR4	PAQR4	-0.922597	3.9022	-6.49162	7.01154e-10	4.22528e-08	Significantly downregulated (Adj-P<0.01)
ENSG00000265354.3_TIMM23	TIMM23	-0.374076	5.53207	-6.4946	6.89839e-10	4.18037e-08	Significantly downregulated (Adj-P<0.01)
ENSG00000154767.14_XPC	XPC	0.349518	3.87192	6.48352	7.32774e-10	4.3574e-08	Significantly upregulated (Adj-P<0.01)
ENSG00000178752.15_ERFE	ERFE	1.84854	0.539449	6.52009	6.00279e-10	3.7375e-08	Significantly upregulated (Adj-P<0.01)
ENSG00000060762.18_MPC1	MPC1	-0.620059	6.33144	-6.48477	7.27781e-10	4.34398e-08	Significantly downregulated (Adj-P<0.01)
ENSG00000278540.4_ACACA	ACACA	0.490476	4.0231	6.47581	7.64149e-10	4.51018e-08	Significantly upregulated (Adj-P<0.01)
ENSG00000140575.12_IQGAP1	IQGAP1	0.622708	4.81574	6.48065	7.44313e-10	4.4095e-08	Significantly upregulated (Adj-P<0.01)
ENSG00000128872.9_TMOD2	TMOD2	0.6014	2.47165	6.45071	8.75793e-10	5.09339e-08	Significantly upregulated (Adj-P<0.01)
ENSG00000228253.1_MT-ATP8	MT-ATP8	-1.54192	6.31136	-6.46453	8.12502e-10	4.77781e-08	Significantly downregulated (Adj-P<0.01)
ENSG00000146373.16_RNF217	RNF217	0.560091	3.97246	6.45408	8.59927e-10	5.03803e-08	Significantly upregulated (Adj-P<0.01)
ENSG00000053438.9_NNAT	NNAT	1.01013	1.93799	6.44038	9.26263e-10	5.34774e-08	Significantly upregulated (Adj-P<0.01)
ENSG00000267815.1_AC008655.1	AC008655.1	-3.19082	-2.60693	-6.57899	4.34784e-10	2.84468e-08	Significantly downregulated (Adj-P<0.01)
ENSG00000157106.16_SMG1	SMG1	0.602328	6.92964	6.45306	8.64691e-10	5.04732e-08	Significantly upregulated (Adj-P<0.01)
ENSG00000185414.19_MRPL30	MRPL30	-0.301947	5.17262	-6.44571	8.99903e-10	5.21451e-08	Significantly downregulated (Adj-P<0.01)
ENSG00000100099.20_HPS4	HPS4	0.383368	3.8279	6.4335	9.6145e-10	5.53078e-08	Significantly upregulated (Adj-P<0.01)
ENSG00000116120.9_FARSB	FARSB	-0.346702	4.67616	-6.42665	9.97802e-10	5.71917e-08	Significantly downregulated (Adj-P<0.01)
ENSG00000196576.14_PLXNB2	PLXNB2	0.869132	3.55895	6.41003	1.09168e-09	6.14634e-08	Significantly upregulated (Adj-P<0.01)
ENSG00000064687.12_ABCA7	ABCA7	0.839216	3.80782	6.41286	1.07511e-09	6.1401e-08	Significantly upregulated (Adj-P<0.01)
ENSG00000108861.8_DUSP3	DUSP3	-0.554547	8.01529	-6.41201	1.08006e-09	6.14629e-08	Significantly downregulated (Adj-P<0.01)
ENSG00000111817.17_DSE	DSE	0.568536	3.26683	6.39904	1.15846e-09	6.46897e-08	Significantly upregulated (Adj-P<0.01)
ENSG00000113558.18_SKP1	SKP1	-0.312228	7.52637	-6.4088	1.09896e-09	6.16542e-08	Significantly downregulated (Adj-P<0.01)
ENSG00000020426.10_MNAT1	MNAT1	-0.386012	4.54664	-6.41132	1.08411e-09	6.14634e-08	Significantly downregulated (Adj-P<0.01)
ENSG00000023516.8_AKAP11	AKAP11	0.626547	4.03023	6.39658	1.17396e-09	6.51713e-08	Significantly upregulated (Adj-P<0.01)
ENSG00000232119.7_MCTS1	MCTS1	-0.422309	3.02034	-6.39128	1.20806e-09	6.68307e-08	Significantly downregulated (Adj-P<0.01)
ENSG00000213551.4_DNAJC9	DNAJC9	0.318558	3.26038	6.38524	1.24804e-09	6.83279e-08	Significantly upregulated (Adj-P<0.01)
ENSG00000149100.12_EIF3M	EIF3M	-0.287228	5.38641	-6.39861	1.16121e-09	6.46897e-08	Significantly downregulated (Adj-P<0.01)
ENSG00000253710.3_ALG11	ALG11	0.731477	2.26683	6.37321	1.33171e-09	7.21621e-08	Significantly upregulated (Adj-P<0.01)
ENSG00000106355.9_LSM5	LSM5	-0.365661	4.06361	-6.38691	1.23688e-09	6.81775e-08	Significantly downregulated (Adj-P<0.01)
ENSG00000172493.20_AFF1	AFF1	0.497073	6.83603	6.38629	1.241e-09	6.81775e-08	Significantly upregulated (Adj-P<0.01)
ENSG00000143158.10_MPC2	MPC2	-0.413934	6.39262	-6.38017	1.28264e-09	6.99812e-08	Significantly downregulated (Adj-P<0.01)
ENSG00000004961.14_HCCS	HCCS	-0.412753	4.8409	-6.37834	1.29536e-09	7.04329e-08	Significantly downregulated (Adj-P<0.01)
ENSG00000173409.13_ARV1	ARV1	-0.424342	2.98604	-6.35987	1.43087e-09	7.70097e-08	Significantly downregulated (Adj-P<0.01)
ENSG00000006695.10_COX10	COX10	-0.477587	5.0404	-6.36296	1.40726e-09	7.59969e-08	Significantly downregulated (Adj-P<0.01)
ENSG00000166797.10_CIAO2A	CIAO2A	-0.582874	4.5519	-6.35784	1.44659e-09	7.75927e-08	Significantly downregulated (Adj-P<0.01)
ENSG00000175581.13_MRPL48	MRPL48	-0.382623	3.48478	-6.34534	1.54709e-09	8.24267e-08	Significantly downregulated (Adj-P<0.01)
ENSG00000196367.13_TRRAP	TRRAP	0.376665	4.91022	6.35121	1.49909e-09	8.01381e-08	Significantly upregulated (Adj-P<0.01)
ENSG00000197620.10_CXorf40A	CXorf40A	-0.450553	3.50448	-6.33487	1.63661e-09	8.69048e-08	Significantly downregulated (Adj-P<0.01)
ENSG00000135297.15_MTO1	MTO1	-0.337607	3.97718	-6.33082	1.67256e-09	8.85173e-08	Significantly downregulated (Adj-P<0.01)
ENSG00000173517.10_PEAK1	PEAK1	0.533936	4.79232	6.32798	1.69822e-09	8.95768e-08	Significantly upregulated (Adj-P<0.01)
ENSG00000103121.8_CMC2	CMC2	-0.525826	3.94764	-6.32225	1.75119e-09	9.17612e-08	Significantly downregulated (Adj-P<0.01)
ENSG00000005194.14_CIAPIN1	CIAPIN1	-0.400105	3.77486	-6.3188	1.78386e-09	9.31657e-08	Significantly downregulated (Adj-P<0.01)
ENSG00000075336.11_TIMM21	TIMM21	-0.392069	5.33752	-6.32465	1.72878e-09	9.0887e-08	Significantly downregulated (Adj-P<0.01)
ENSG00000184702.19_SEPT5	2020-09-05	1.13136	2.20358	6.29985	1.97443e-09	1.00798e-07	Significantly upregulated (Adj-P<0.01)
ENSG00000138758.11_SEPT11	2020-09-11	0.54678	3.64415	6.31155	1.85452e-09	9.55982e-08	Significantly upregulated (Adj-P<0.01)
ENSG00000157827.19_FMNL2	FMNL2	0.597562	4.22093	6.31494	1.82114e-09	9.41831e-08	Significantly upregulated (Adj-P<0.01)
ENSG00000185739.13_SRL	SRL	-0.333309	9.31801	-6.304	1.93103e-09	9.88998e-08	Significantly downregulated (Adj-P<0.01)
ENSG00000131467.10_PSME3	PSME3	-0.238077	5.05327	-6.31688	1.80238e-09	9.38242e-08	Significantly downregulated (Adj-P<0.01)
ENSG00000134313.15_KIDINS220	KIDINS220	0.442163	5.58041	6.31571	1.81369e-09	9.41045e-08	Significantly upregulated (Adj-P<0.01)
ENSG00000279649.1_AC020978.9	AC020978.9	0.945863	2.63698	6.29105	2.06953e-09	1.04643e-07	Significantly upregulated (Adj-P<0.01)
ENSG00000253352.9_TUG1	TUG1	0.448912	5.69438	6.30733	1.89689e-09	9.74656e-08	Significantly upregulated (Adj-P<0.01)
ENSG00000186432.8_KPNA4	KPNA4	-0.462911	7.7431	-6.29233	2.05546e-09	1.04598e-07	Significantly downregulated (Adj-P<0.01)
ENSG00000152234.15_ATP5F1A	ATP5F1A	-0.478886	9.71624	-6.2807	2.18723e-09	1.09338e-07	Significantly downregulated (Adj-P<0.01)
ENSG00000268043.7_NBPF12	NBPF12	0.480198	2.41363	6.26912	2.32654e-09	1.14008e-07	Significantly upregulated (Adj-P<0.01)
ENSG00000135837.15_CEP350	CEP350	0.619039	5.73045	6.29142	2.0654e-09	1.04643e-07	Significantly upregulated (Adj-P<0.01)
ENSG00000122912.14_SLC25A16	SLC25A16	-0.346308	3.72383	-6.2819	2.17323e-09	1.09191e-07	Significantly downregulated (Adj-P<0.01)
ENSG00000104325.6_DECR1	DECR1	-0.579897	5.92395	-6.28704	2.1144e-09	1.06572e-07	Significantly downregulated (Adj-P<0.01)
ENSG00000145734.18_BDP1	BDP1	0.626365	4.24867	6.27844	2.21371e-09	1.09834e-07	Significantly upregulated (Adj-P<0.01)
ENSG00000163625.15_WDFY3	WDFY3	0.552732	4.42727	6.27997	2.19575e-09	1.09338e-07	Significantly upregulated (Adj-P<0.01)
ENSG00000112893.9_MAN2A1	MAN2A1	0.55122	4.34918	6.27659	2.23573e-09	1.10581e-07	Significantly upregulated (Adj-P<0.01)
ENSG00000155463.12_OXA1L	OXA1L	-0.335793	6.76549	-6.27988	2.19681e-09	1.09338e-07	Significantly downregulated (Adj-P<0.01)
ENSG00000188739.14_RBM34	RBM34	-0.291856	3.75756	-6.27447	2.2611e-09	1.11489e-07	Significantly downregulated (Adj-P<0.01)
ENSG00000081923.13_ATP8B1	ATP8B1	0.865169	2.22033	6.25395	2.5225e-09	1.21732e-07	Significantly upregulated (Adj-P<0.01)
ENSG00000149970.15_CNKSR2	CNKSR2	-1.14772	2.57336	-6.26183	2.41879e-09	1.17925e-07	Significantly downregulated (Adj-P<0.01)
ENSG00000164588.6_HCN1	HCN1	1.74533	2.97547	6.2522	2.54606e-09	1.22496e-07	Significantly upregulated (Adj-P<0.01)
ENSG00000114127.10_XRN1	XRN1	0.548433	4.81064	6.27163	2.29561e-09	1.1284e-07	Significantly upregulated (Adj-P<0.01)
ENSG00000177606.6_JUN	JUN	0.67623	7.59418	6.26163	2.42134e-09	1.17925e-07	Significantly upregulated (Adj-P<0.01)
ENSG00000076685.18_NT5C2	NT5C2	0.547891	6.67299	6.25825	2.46539e-09	1.19703e-07	Significantly upregulated (Adj-P<0.01)
ENSG00000100296.13_THOC5	THOC5	-0.352567	4.38098	-6.25589	2.49654e-09	1.20846e-07	Significantly downregulated (Adj-P<0.01)
ENSG00000128833.12_MYO5C	MYO5C	0.764477	2.18699	6.22939	2.87444e-09	1.35423e-07	Significantly upregulated (Adj-P<0.01)
ENSG00000128609.14_NDUFA5	NDUFA5	-0.414172	7.2717	-6.24619	2.62888e-09	1.26099e-07	Significantly downregulated (Adj-P<0.01)
ENSG00000132541.10_RIDA	RIDA	-0.353135	3.57944	-6.23417	2.80241e-09	1.32422e-07	Significantly downregulated (Adj-P<0.01)
ENSG00000168769.13_TET2	TET2	0.628108	3.52476	6.22529	2.93783e-09	1.37814e-07	Significantly upregulated (Adj-P<0.01)
ENSG00000123545.5_NDUFAF4	NDUFAF4	-0.44623	4.55939	-6.23507	2.78905e-09	1.32185e-07	Significantly downregulated (Adj-P<0.01)
ENSG00000112282.17_MED23	MED23	0.489822	3.97102	6.22306	2.97273e-09	1.38722e-07	Significantly upregulated (Adj-P<0.01)
ENSG00000134909.18_ARHGAP32	ARHGAP32	0.610189	4.14614	6.22264	2.97943e-09	1.38722e-07	Significantly upregulated (Adj-P<0.01)
ENSG00000187240.14_DYNC2H1	DYNC2H1	0.882512	0.568733	6.24311	2.67231e-09	1.27412e-07	Significantly upregulated (Adj-P<0.01)
ENSG00000163166.14_IWS1	IWS1	-0.288053	4.82449	-6.21924	3.03372e-09	1.40838e-07	Significantly downregulated (Adj-P<0.01)
ENSG00000273136.6_NBPF26	NBPF26	1.01147	1.85349	6.19123	3.51911e-09	1.61482e-07	Significantly upregulated (Adj-P<0.01)
ENSG00000141469.17_SLC14A1	SLC14A1	-0.89765	1.69482	-6.18069	3.72086e-09	1.69272e-07	Significantly downregulated (Adj-P<0.01)
ENSG00000106993.11_CDC37L1	CDC37L1	-0.558935	5.19559	-6.20494	3.27265e-09	1.51487e-07	Significantly downregulated (Adj-P<0.01)
ENSG00000134014.16_ELP3	ELP3	-0.296671	4.45988	-6.19999	3.35959e-09	1.55059e-07	Significantly downregulated (Adj-P<0.01)
ENSG00000204568.11_MRPS18B	MRPS18B	-0.380671	6.20783	-6.19889	3.37934e-09	1.55518e-07	Significantly downregulated (Adj-P<0.01)
ENSG00000112773.15_TENT5A	TENT5A	0.71839	1.97639	6.17095	3.91738e-09	1.76193e-07	Significantly upregulated (Adj-P<0.01)
ENSG00000107949.16_BCCIP	BCCIP	-0.271999	4.90902	-6.19006	3.54097e-09	1.61551e-07	Significantly downregulated (Adj-P<0.01)
ENSG00000165494.11_PCF11	PCF11	0.351729	5.20623	6.19014	3.53941e-09	1.61551e-07	Significantly upregulated (Adj-P<0.01)
ENSG00000152904.11_GGPS1	GGPS1	-0.381884	3.97035	-6.17993	3.73591e-09	1.69339e-07	Significantly downregulated (Adj-P<0.01)
ENSG00000115464.14_USP34	USP34	0.444902	5.71511	6.17954	3.74365e-09	1.69339e-07	Significantly upregulated (Adj-P<0.01)
ENSG00000116704.7_SLC35D1	SLC35D1	0.53893	3.98509	6.1661	4.01901e-09	1.79241e-07	Significantly upregulated (Adj-P<0.01)
ENSG00000139263.11_LRIG3	LRIG3	0.687676	2.47736	6.14854	4.40904e-09	1.92844e-07	Significantly upregulated (Adj-P<0.01)
ENSG00000100568.10_VTI1B	VTI1B	-0.275892	5.8067	-6.16985	3.94023e-09	1.76721e-07	Significantly downregulated (Adj-P<0.01)
ENSG00000187522.15_HSPA14	HSPA14	-0.439532	3.12159	-6.15165	4.33726e-09	1.91285e-07	Significantly downregulated (Adj-P<0.01)
ENSG00000150347.15_ARID5B	ARID5B	0.913929	5.24257	6.16403	4.0632e-09	1.80704e-07	Significantly upregulated (Adj-P<0.01)
ENSG00000174373.16_RALGAPA1	RALGAPA1	0.553748	4.4742	6.16115	4.12549e-09	1.82962e-07	Significantly upregulated (Adj-P<0.01)
ENSG00000139684.13_ESD	ESD	-0.259581	5.31337	-6.16633	4.01425e-09	1.79241e-07	Significantly downregulated (Adj-P<0.01)
ENSG00000198860.12_TSEN15	TSEN15	-0.301785	4.17942	-6.15403	4.28317e-09	1.89426e-07	Significantly downregulated (Adj-P<0.01)
ENSG00000281183.1_NPTN-IT1	NPTN-IT1	1.07071	2.3617	6.12962	4.87079e-09	2.1e-07	Significantly upregulated (Adj-P<0.01)
ENSG00000138193.15_PLCE1	PLCE1	0.998445	3.04684	6.12923	4.88064e-09	2.1e-07	Significantly upregulated (Adj-P<0.01)
ENSG00000136478.7_TEX2	TEX2	-0.381515	5.87073	-6.14861	4.40732e-09	1.92844e-07	Significantly downregulated (Adj-P<0.01)
ENSG00000177409.11_SAMD9L	SAMD9L	1.03262	2.62363	6.11971	5.13122e-09	2.18414e-07	Significantly upregulated (Adj-P<0.01)
ENSG00000113643.8_RARS	RARS	-0.289767	4.43503	-6.14276	4.54522e-09	1.98254e-07	Significantly downregulated (Adj-P<0.01)
ENSG00000230551.4_AC021078.1	AC021078.1	0.622208	3.8452	6.1267	4.94601e-09	2.12237e-07	Significantly upregulated (Adj-P<0.01)
ENSG00000173209.23_AHSA2P	AHSA2P	0.323808	5.51787	6.14072	4.59447e-09	1.99853e-07	Significantly upregulated (Adj-P<0.01)
ENSG00000167920.8_TMEM99	TMEM99	-0.497723	1.99621	-6.10891	5.43052e-09	2.2931e-07	Significantly downregulated (Adj-P<0.01)
ENSG00000118058.21_KMT2A	KMT2A	0.568133	5.15312	6.13179	4.81551e-09	2.08327e-07	Significantly upregulated (Adj-P<0.01)
ENSG00000169189.16_NSMCE1	NSMCE1	-0.419414	3.59502	-6.12432	5.00852e-09	2.13764e-07	Significantly downregulated (Adj-P<0.01)
ENSG00000177106.15_EPS8L2	EPS8L2	1.82567	-0.73208	6.23559	2.78139e-09	1.32185e-07	Significantly upregulated (Adj-P<0.01)
ENSG00000111906.17_HDDC2	HDDC2	-0.510843	5.06518	-6.12464	5.00002e-09	2.13764e-07	Significantly downregulated (Adj-P<0.01)
ENSG00000089876.11_DHX32	DHX32	-0.312321	3.71929	-6.11544	5.24768e-09	2.22774e-07	Significantly downregulated (Adj-P<0.01)
ENSG00000272742.1_AC135457.1	AC135457.1	-1.86383	-0.577669	-6.15086	4.35534e-09	1.9155e-07	Significantly downregulated (Adj-P<0.01)
ENSG00000131828.13_PDHA1	PDHA1	-0.45395	7.25675	-6.11489	5.2628e-09	2.2282e-07	Significantly downregulated (Adj-P<0.01)
ENSG00000206530.10_CFAP44	CFAP44	0.670287	1.99343	6.09114	5.96086e-09	2.45183e-07	Significantly upregulated (Adj-P<0.01)
ENSG00000134250.19_NOTCH2	NOTCH2	0.615459	4.09323	6.10515	5.53888e-09	2.30816e-07	Significantly upregulated (Adj-P<0.01)
ENSG00000176261.15_ZBTB8OS	ZBTB8OS	-0.377011	2.75633	-6.09289	5.90664e-09	2.44218e-07	Significantly downregulated (Adj-P<0.01)
ENSG00000198947.15_DMD	DMD	0.683917	8.01267	6.10645	5.50116e-09	2.30814e-07	Significantly upregulated (Adj-P<0.01)
ENSG00000224660.1_SH3BP5-AS1	SH3BP5-AS1	0.560128	4.40268	6.10615	5.50976e-09	2.30814e-07	Significantly upregulated (Adj-P<0.01)
ENSG00000103035.10_PSMD7	PSMD7	-0.254561	6.6539	-6.10674	5.49274e-09	2.30814e-07	Significantly downregulated (Adj-P<0.01)
ENSG00000147133.15_TAF1	TAF1	0.420096	4.58818	6.10558	5.52639e-09	2.30816e-07	Significantly upregulated (Adj-P<0.01)
ENSG00000212907.2_MT-ND4L	MT-ND4L	-1.0454	9.21731	-6.09369	5.88186e-09	2.43829e-07	Significantly downregulated (Adj-P<0.01)
ENSG00000112210.11_RAB23	RAB23	0.788282	2.49881	6.07392	6.52296e-09	2.65551e-07	Significantly upregulated (Adj-P<0.01)
ENSG00000156709.13_AIFM1	AIFM1	-0.396728	5.56836	-6.09884	5.7253e-09	2.3796e-07	Significantly downregulated (Adj-P<0.01)
ENSG00000136270.13_TBRG4	TBRG4	-0.360955	5.47714	-6.09135	5.95426e-09	2.45183e-07	Significantly downregulated (Adj-P<0.01)
ENSG00000275131.3_AC241952.1	AC241952.1	0.675254	8.26937	6.08271	6.22997e-09	2.5559e-07	Significantly upregulated (Adj-P<0.01)
ENSG00000132313.14_MRPL35	MRPL35	-0.374853	5.47878	-6.0814	6.27281e-09	2.56684e-07	Significantly downregulated (Adj-P<0.01)
ENSG00000143207.20_COP1	COP1	-0.297146	3.64899	-6.06934	6.6811e-09	2.71294e-07	Significantly downregulated (Adj-P<0.01)
ENSG00000285943.1_AC112128.1	AC112128.1	1.3515	0.0861577	6.13308	4.78284e-09	2.07478e-07	Significantly upregulated (Adj-P<0.01)
ENSG00000158435.7_CNOT11	CNOT11	-0.274579	4.28367	-6.06757	6.74324e-09	2.72423e-07	Significantly downregulated (Adj-P<0.01)
ENSG00000196263.7_ZNF471	ZNF471	0.579431	2.60927	6.04274	7.6763e-09	3.04691e-07	Significantly upregulated (Adj-P<0.01)
ENSG00000059588.9_TARBP1	TARBP1	0.439886	5.03215	6.06766	6.74023e-09	2.72423e-07	Significantly upregulated (Adj-P<0.01)
ENSG00000069667.15_RORA	RORA	0.747457	5.85442	6.06657	6.77855e-09	2.73155e-07	Significantly upregulated (Adj-P<0.01)
ENSG00000058063.15_ATP11B	ATP11B	0.457618	3.9202	6.05196	7.31595e-09	2.92265e-07	Significantly upregulated (Adj-P<0.01)
ENSG00000183426.16_NPIPA1	NPIPA1	0.459056	5.99272	6.06174	6.95163e-09	2.7942e-07	Significantly upregulated (Adj-P<0.01)
ENSG00000008869.11_HEATR5B	HEATR5B	0.48742	3.27588	6.0416	7.7219e-09	3.05737e-07	Significantly upregulated (Adj-P<0.01)
ENSG00000122406.13_RPL5	RPL5	-0.282477	7.96633	-6.05168	7.32641e-09	2.92265e-07	Significantly downregulated (Adj-P<0.01)
ENSG00000005108.15_THSD7A	THSD7A	1.41636	-0.87413	6.24344	2.66758e-09	1.27412e-07	Significantly upregulated (Adj-P<0.01)
ENSG00000185658.13_BRWD1	BRWD1	0.410971	5.29768	6.05502	7.19996e-09	2.88671e-07	Significantly upregulated (Adj-P<0.01)
ENSG00000108953.16_YWHAE	YWHAE	-0.237809	8.22745	-6.04576	7.55616e-09	3.00674e-07	Significantly downregulated (Adj-P<0.01)
ENSG00000030304.13_MUSK	MUSK	2.58958	-1.12137	6.41041	1.08947e-09	6.14634e-08	Significantly upregulated (Adj-P<0.01)
ENSG00000170954.11_ZNF415	ZNF415	-1.13066	1.08792	-6.02004	8.63901e-09	3.35358e-07	Significantly downregulated (Adj-P<0.01)
ENSG00000046653.14_GPM6B	GPM6B	0.875676	0.796185	6.03263	8.09149e-09	3.17206e-07	Significantly upregulated (Adj-P<0.01)
ENSG00000147421.17_HMBOX1	HMBOX1	0.645431	2.3995	6.01496	8.87032e-09	3.43498e-07	Significantly upregulated (Adj-P<0.01)
ENSG00000075240.16_GRAMD4	GRAMD4	0.480604	3.78373	6.02917	8.23855e-09	3.20597e-07	Significantly upregulated (Adj-P<0.01)
ENSG00000108671.10_PSMD11	PSMD11	-0.2636	5.91299	-6.03516	7.98561e-09	3.14609e-07	Significantly downregulated (Adj-P<0.01)
ENSG00000136146.14_MED4	MED4	-0.248727	4.59939	-6.03139	8.1437e-09	3.18467e-07	Significantly downregulated (Adj-P<0.01)
ENSG00000133112.16_TPT1	TPT1	-0.344348	12.2564	-6.00439	9.37075e-09	3.60241e-07	Significantly downregulated (Adj-P<0.01)
ENSG00000180354.15_MTURN	MTURN	0.528529	6.18074	6.03041	8.18522e-09	3.19304e-07	Significantly upregulated (Adj-P<0.01)
ENSG00000250878.3_METTL21EP	METTL21EP	-1.55326	1.92006	-5.99226	9.97927e-09	3.80868e-07	Significantly downregulated (Adj-P<0.01)
ENSG00000278249.1_SCARNA2	SCARNA2	-1.21406	0.443283	-5.9868	1.02657e-08	3.9086e-07	Significantly downregulated (Adj-P<0.01)
ENSG00000142166.12_IFNAR1	IFNAR1	-0.390178	4.57464	-6.01063	9.07192e-09	3.5045e-07	Significantly downregulated (Adj-P<0.01)
ENSG00000143387.12_CTSK	CTSK	0.992342	1.90601	5.97896	1.06912e-08	4.02239e-07	Significantly upregulated (Adj-P<0.01)
ENSG00000127914.16_AKAP9	AKAP9	0.507749	6.84502	6.00832	9.1818e-09	3.53834e-07	Significantly upregulated (Adj-P<0.01)
ENSG00000166532.15_RIMKLB	RIMKLB	0.655752	3.92984	5.99714	9.73011e-09	3.73152e-07	Significantly upregulated (Adj-P<0.01)
ENSG00000167555.13_ZNF528	ZNF528	0.542982	2.53807	5.97913	1.06821e-08	4.02239e-07	Significantly upregulated (Adj-P<0.01)
ENSG00000131080.14_EDA2R	EDA2R	2.06528	0.561348	6.04048	7.76727e-09	3.06769e-07	Significantly upregulated (Adj-P<0.01)
ENSG00000054277.13_OPN3	OPN3	-0.746283	1.41541	-5.96885	1.12656e-08	4.22846e-07	Significantly downregulated (Adj-P<0.01)
ENSG00000109046.14_WSB1	WSB1	0.428405	6.0268	5.99599	9.78851e-09	3.74487e-07	Significantly upregulated (Adj-P<0.01)
ENSG00000118816.9_CCNI	CCNI	-0.366606	7.18037	-5.98399	1.04167e-08	3.95661e-07	Significantly downregulated (Adj-P<0.01)
ENSG00000181284.2_TMEM102	TMEM102	-1.15003	0.0387061	-5.96355	1.15787e-08	4.32552e-07	Significantly downregulated (Adj-P<0.01)
ENSG00000250317.8_SMIM20	SMIM20	-0.52036	4.45973	-5.9805	1.06064e-08	4.01904e-07	Significantly downregulated (Adj-P<0.01)
ENSG00000137547.8_MRPL15	MRPL15	-0.410679	5.93187	-5.97948	1.06628e-08	4.02239e-07	Significantly downregulated (Adj-P<0.01)
ENSG00000105327.17_BBC3	BBC3	1.0204	1.63435	5.94441	1.27813e-08	4.69743e-07	Significantly upregulated (Adj-P<0.01)
ENSG00000198040.10_ZNF84	ZNF84	0.371256	3.94572	5.96026	1.17768e-08	4.38922e-07	Significantly upregulated (Adj-P<0.01)
ENSG00000173511.9_VEGFB	VEGFB	-0.545782	5.58116	-5.96662	1.13961e-08	4.26734e-07	Significantly downregulated (Adj-P<0.01)
ENSG00000213390.10_ARHGAP19	ARHGAP19	0.483768	2.15414	5.93268	1.35775e-08	4.93295e-07	Significantly upregulated (Adj-P<0.01)
ENSG00000066084.12_DIP2B	DIP2B	0.494333	3.79789	5.94722	1.25974e-08	4.64889e-07	Significantly upregulated (Adj-P<0.01)
ENSG00000138658.15_ZGRF1	ZGRF1	0.813213	1.5329	5.92898	1.38392e-08	4.99375e-07	Significantly upregulated (Adj-P<0.01)
ENSG00000114354.13_TFG	TFG	-0.319863	4.83508	-5.95809	1.191e-08	4.41811e-07	Significantly downregulated (Adj-P<0.01)
ENSG00000101974.14_ATP11C	ATP11C	0.715846	1.49842	5.92551	1.40888e-08	5.05227e-07	Significantly upregulated (Adj-P<0.01)
ENSG00000130590.13_SAMD10	SAMD10	-0.919178	-0.788681	-5.95859	1.18789e-08	4.4169e-07	Significantly downregulated (Adj-P<0.01)
ENSG00000177917.10_ARL6IP6	ARL6IP6	0.466189	2.87128	5.92727	1.39615e-08	5.02646e-07	Significantly upregulated (Adj-P<0.01)
ENSG00000173275.12_ZNF449	ZNF449	0.561799	2.88454	5.92539	1.40968e-08	5.05227e-07	Significantly upregulated (Adj-P<0.01)
ENSG00000126524.9_SBDS	SBDS	-0.389965	7.24992	-5.94366	1.28305e-08	4.70463e-07	Significantly downregulated (Adj-P<0.01)
ENSG00000136463.7_TACO1	TACO1	-0.413978	4.80677	-5.94687	1.262e-08	4.64889e-07	Significantly downregulated (Adj-P<0.01)
ENSG00000150768.15_DLAT	DLAT	-0.51678	6.56189	-5.94314	1.28651e-08	4.70643e-07	Significantly downregulated (Adj-P<0.01)
ENSG00000116459.10_ATP5PB	ATP5PB	-0.433756	7.42045	-5.93812	1.32026e-08	4.80773e-07	Significantly downregulated (Adj-P<0.01)
ENSG00000146281.5_PM20D2	PM20D2	0.487837	5.53267	5.94046	1.30444e-08	4.76104e-07	Significantly upregulated (Adj-P<0.01)
ENSG00000119509.12_INVS	INVS	0.588155	1.65278	5.90673	1.55166e-08	5.51135e-07	Significantly upregulated (Adj-P<0.01)
ENSG00000185070.10_FLRT2	FLRT2	0.668168	5.02137	5.93057	1.37262e-08	4.96426e-07	Significantly upregulated (Adj-P<0.01)
ENSG00000115806.12_GORASP2	GORASP2	-0.199754	5.02985	-5.93206	1.36213e-08	4.93755e-07	Significantly downregulated (Adj-P<0.01)
ENSG00000143341.11_HMCN1	HMCN1	0.910358	2.6818	5.90282	1.5832e-08	5.59831e-07	Significantly upregulated (Adj-P<0.01)
ENSG00000132549.18_VPS13B	VPS13B	0.537663	3.72474	5.91632	1.47702e-08	5.2698e-07	Significantly upregulated (Adj-P<0.01)
ENSG00000196867.7_ZFP28	ZFP28	0.504055	1.79526	5.89531	1.64541e-08	5.80537e-07	Significantly upregulated (Adj-P<0.01)
ENSG00000240583.11_AQP1	AQP1	-0.61358	6.63716	-5.91773	1.46637e-08	5.2436e-07	Significantly downregulated (Adj-P<0.01)
ENSG00000130856.16_ZNF236	ZNF236	0.543261	2.95185	5.89366	1.65933e-08	5.84149e-07	Significantly upregulated (Adj-P<0.01)
ENSG00000204370.10_SDHD	SDHD	-0.365205	7.25724	-5.90842	1.53823e-08	5.4759e-07	Significantly downregulated (Adj-P<0.01)
ENSG00000229152.2_ANKRD10-IT1	ANKRD10-IT1	0.870718	1.42753	5.88496	1.73507e-08	6.02795e-07	Significantly upregulated (Adj-P<0.01)
ENSG00000258676.4_AC091544.2	AC091544.2	2.25813	-1.26343	6.22499	2.94255e-09	1.37814e-07	Significantly upregulated (Adj-P<0.01)
ENSG00000169288.17_MRPL1	MRPL1	-0.380841	4.53143	-5.90532	1.56296e-08	5.53909e-07	Significantly downregulated (Adj-P<0.01)
ENSG00000114107.8_CEP70	CEP70	-0.425217	3.18469	-5.88771	1.71073e-08	5.98265e-07	Significantly downregulated (Adj-P<0.01)
ENSG00000151729.10_SLC25A4	SLC25A4	-0.542824	10.1541	-5.87965	1.78285e-08	6.16181e-07	Significantly downregulated (Adj-P<0.01)
ENSG00000119013.8_NDUFB3	NDUFB3	-0.500223	6.36477	-5.89135	1.67912e-08	5.8981e-07	Significantly downregulated (Adj-P<0.01)
ENSG00000112335.14_SNX3	SNX3	-0.269332	6.89669	-5.8859	1.72667e-08	6.01192e-07	Significantly downregulated (Adj-P<0.01)
ENSG00000104695.12_PPP2CB	PPP2CB	-0.328806	5.58989	-5.88863	1.70274e-08	5.96785e-07	Significantly downregulated (Adj-P<0.01)
ENSG00000257379.1_AC023509.1	AC023509.1	0.623959	2.81799	5.86385	1.93304e-08	6.57193e-07	Significantly upregulated (Adj-P<0.01)
ENSG00000048740.18_CELF2	CELF2	0.610591	4.33686	5.87886	1.79015e-08	6.16533e-07	Significantly upregulated (Adj-P<0.01)
ENSG00000164258.11_NDUFS4	NDUFS4	-0.377887	5.97231	-5.88623	1.72382e-08	6.01192e-07	Significantly downregulated (Adj-P<0.01)
ENSG00000124177.14_CHD6	CHD6	0.496801	4.44942	5.87939	1.78524e-08	6.16181e-07	Significantly upregulated (Adj-P<0.01)
ENSG00000116030.16_SUMO1	SUMO1	-0.247196	5.47657	-5.88001	1.77961e-08	6.16181e-07	Significantly downregulated (Adj-P<0.01)
ENSG00000174132.8_FAM174A	FAM174A	-0.348075	4.14896	-5.87001	1.87307e-08	6.39543e-07	Significantly downregulated (Adj-P<0.01)
ENSG00000181929.12_PRKAG1	PRKAG1	-0.345369	5.58619	-5.87174	1.85655e-08	6.37276e-07	Significantly downregulated (Adj-P<0.01)
ENSG00000138069.17_RAB1A	RAB1A	-0.223763	5.07106	-5.87152	1.85865e-08	6.37276e-07	Significantly downregulated (Adj-P<0.01)
ENSG00000115541.10_HSPE1	HSPE1	-0.445722	4.83462	-5.87113	1.86242e-08	6.37276e-07	Significantly downregulated (Adj-P<0.01)
ENSG00000105426.16_PTPRS	PTPRS	0.533527	4.63613	5.86396	1.93199e-08	6.57193e-07	Significantly upregulated (Adj-P<0.01)
ENSG00000281383.1_FP671120.4	FP671120.4	-1.38637	-1.8321	-5.84673	2.10968e-08	7.1086e-07	Significantly downregulated (Adj-P<0.01)
ENSG00000110436.12_SLC1A2	SLC1A2	1.82116	-0.538566	6.03272	8.08755e-09	3.17206e-07	Significantly upregulated (Adj-P<0.01)
ENSG00000204186.8_ZDBF2	ZDBF2	0.705054	4.24477	5.84773	2.09891e-08	7.0903e-07	Significantly upregulated (Adj-P<0.01)
ENSG00000183520.11_UTP11	UTP11	-0.424017	6.20251	-5.85466	2.02596e-08	6.87311e-07	Significantly downregulated (Adj-P<0.01)
ENSG00000120053.11_GOT1	GOT1	-0.654655	7.89064	-5.84289	2.15139e-08	7.16902e-07	Significantly downregulated (Adj-P<0.01)
ENSG00000260804.3_LINC01963	LINC01963	-0.493769	4.12806	-5.8464	2.11328e-08	7.1086e-07	Significantly downregulated (Adj-P<0.01)
ENSG00000130528.11_HRC	HRC	-0.323022	7.80573	-5.843	2.15027e-08	7.16902e-07	Significantly downregulated (Adj-P<0.01)
ENSG00000108179.13_PPIF	PPIF	-0.547698	5.78954	-5.84982	2.07663e-08	7.03e-07	Significantly downregulated (Adj-P<0.01)
ENSG00000239789.5_MRPS17	MRPS17	-0.308041	3.97806	-5.84309	2.14918e-08	7.16902e-07	Significantly downregulated (Adj-P<0.01)
ENSG00000124356.15_STAMBP	STAMBP	-0.300683	4.53379	-5.84505	2.12784e-08	7.14245e-07	Significantly downregulated (Adj-P<0.01)
ENSG00000107611.15_CUBN	CUBN	0.75957	0.497993	5.83225	2.27139e-08	7.52879e-07	Significantly upregulated (Adj-P<0.01)
ENSG00000152926.14_ZNF117	ZNF117	1.35564	2.45045	5.80933	2.55237e-08	8.2871e-07	Significantly upregulated (Adj-P<0.01)
ENSG00000135900.3_MRPL44	MRPL44	-0.29234	4.58645	-5.84267	2.15382e-08	7.16902e-07	Significantly downregulated (Adj-P<0.01)
ENSG00000126070.19_AGO3	AGO3	0.38933	3.98132	5.83149	2.28018e-08	7.54216e-07	Significantly upregulated (Adj-P<0.01)
ENSG00000050393.11_MCUR1	MCUR1	-0.365494	4.11324	-5.83854	2.19966e-08	7.30627e-07	Significantly downregulated (Adj-P<0.01)
ENSG00000007402.11_CACNA2D2	CACNA2D2	0.623703	1.40342	5.79625	2.72756e-08	8.67844e-07	Significantly upregulated (Adj-P<0.01)
ENSG00000186575.17_NF2	NF2	-0.313535	5.00097	-5.83078	2.2884e-08	7.55363e-07	Significantly downregulated (Adj-P<0.01)
ENSG00000149212.11_SESN3	SESN3	0.940916	3.4874	5.80863	2.56145e-08	8.29831e-07	Significantly upregulated (Adj-P<0.01)
ENSG00000184465.16_WDR27	WDR27	0.49509	2.89214	5.80675	2.58595e-08	8.34494e-07	Significantly upregulated (Adj-P<0.01)
ENSG00000235560.3_AC002310.1	AC002310.1	-0.74584	-0.268097	-5.82623	2.34202e-08	7.71458e-07	Significantly downregulated (Adj-P<0.01)
ENSG00000147166.10_ITGB1BP2	ITGB1BP2	-0.563845	4.08822	-5.8199	2.41877e-08	7.93446e-07	Significantly downregulated (Adj-P<0.01)
ENSG00000181690.7_PLAG1	PLAG1	1.77981	1.12037	5.82514	2.35516e-08	7.74178e-07	Significantly upregulated (Adj-P<0.01)
ENSG00000064042.17_LIMCH1	LIMCH1	0.420949	8.45185	5.80983	2.5458e-08	8.2871e-07	Significantly upregulated (Adj-P<0.01)
ENSG00000110888.17_CAPRIN2	CAPRIN2	0.521769	3.31918	5.79918	2.68728e-08	8.56745e-07	Significantly upregulated (Adj-P<0.01)
ENSG00000147669.10_POLR2K	POLR2K	-0.280313	3.54722	-5.80628	2.59213e-08	8.34794e-07	Significantly downregulated (Adj-P<0.01)
ENSG00000115685.14_PPP1R7	PPP1R7	-0.2788	4.81076	-5.81092	2.53172e-08	8.2871e-07	Significantly downregulated (Adj-P<0.01)
ENSG00000067141.16_NEO1	NEO1	0.4721	5.71357	5.80826	2.56627e-08	8.29831e-07	Significantly upregulated (Adj-P<0.01)
ENSG00000167863.11_ATP5PD	ATP5PD	-0.39066	7.19135	-5.8002	2.67351e-08	8.54071e-07	Significantly downregulated (Adj-P<0.01)
ENSG00000160194.17_NDUFV3	NDUFV3	-0.429726	6.01238	-5.80342	2.63015e-08	8.43613e-07	Significantly downregulated (Adj-P<0.01)
ENSG00000160714.9_UBE2Q1	UBE2Q1	-0.237274	4.24084	-5.80044	2.67024e-08	8.54071e-07	Significantly downregulated (Adj-P<0.01)
ENSG00000017797.12_RALBP1	RALBP1	-0.274806	5.67525	-5.80431	2.61818e-08	8.41475e-07	Significantly downregulated (Adj-P<0.01)
ENSG00000168916.15_ZNF608	ZNF608	0.992095	2.25634	5.76286	3.23018e-08	1.00363e-06	Significantly upregulated (Adj-P<0.01)
ENSG00000014641.17_MDH1	MDH1	-0.568047	8.20549	-5.78279	2.92019e-08	9.21748e-07	Significantly downregulated (Adj-P<0.01)
ENSG00000162613.16_FUBP1	FUBP1	0.452237	4.75469	5.79005	2.81479e-08	8.93807e-07	Significantly upregulated (Adj-P<0.01)
ENSG00000125977.6_EIF2S2	EIF2S2	-0.284966	6.09571	-5.78643	2.86686e-08	9.08526e-07	Significantly downregulated (Adj-P<0.01)
ENSG00000196159.11_FAT4	FAT4	0.686217	2.78801	5.75959	3.28405e-08	1.01838e-06	Significantly upregulated (Adj-P<0.01)
ENSG00000185760.15_KCNQ5	KCNQ5	0.807163	5.92506	5.78541	2.88181e-08	9.11444e-07	Significantly upregulated (Adj-P<0.01)
ENSG00000135002.11_RFK	RFK	-0.427765	3.79996	-5.77357	3.0598e-08	9.60087e-07	Significantly downregulated (Adj-P<0.01)
ENSG00000101752.11_MIB1	MIB1	0.528668	3.80456	5.76633	3.17397e-08	9.91992e-07	Significantly upregulated (Adj-P<0.01)
ENSG00000066739.11_ATG2B	ATG2B	0.433403	5.00234	5.77833	2.98704e-08	9.40977e-07	Significantly upregulated (Adj-P<0.01)
ENSG00000083099.10_LYRM2	LYRM2	-0.333981	4.83373	-5.77366	3.05838e-08	9.60087e-07	Significantly downregulated (Adj-P<0.01)
ENSG00000122378.13_PRXL2A	PRXL2A	-0.57876	5.03162	-5.76971	3.12012e-08	9.77083e-07	Significantly downregulated (Adj-P<0.01)
ENSG00000152223.13_EPG5	EPG5	0.445697	4.7804	5.76465	3.20106e-08	9.98491e-07	Significantly upregulated (Adj-P<0.01)
ENSG00000146242.8_TPBG	TPBG	0.869831	0.747142	5.73824	3.65759e-08	1.11462e-06	Significantly upregulated (Adj-P<0.01)
ENSG00000112304.10_ACOT13	ACOT13	-0.301551	4.36094	-5.76321	3.22441e-08	1.00363e-06	Significantly downregulated (Adj-P<0.01)
ENSG00000179456.10_ZBTB18	ZBTB18	-0.418992	6.5486	-5.75787	3.31264e-08	1.02524e-06	Significantly downregulated (Adj-P<0.01)
ENSG00000093144.18_ECHDC1	ECHDC1	-0.318803	4.80249	-5.75693	3.32838e-08	1.02811e-06	Significantly downregulated (Adj-P<0.01)
ENSG00000176731.11_C8orf59	C8orf59	-0.420822	3.50692	-5.74584	3.52017e-08	1.08524e-06	Significantly downregulated (Adj-P<0.01)
ENSG00000113013.13_HSPA9	HSPA9	-0.318247	8.05138	-5.74511	3.53308e-08	1.08711e-06	Significantly downregulated (Adj-P<0.01)
ENSG00000177731.15_FLII	FLII	-0.352139	8.26974	-5.73956	3.63331e-08	1.10935e-06	Significantly downregulated (Adj-P<0.01)
ENSG00000187231.13_SESTD1	SESTD1	0.461249	3.04559	5.72311	3.94738e-08	1.18923e-06	Significantly upregulated (Adj-P<0.01)
ENSG00000170270.4_GON7	GON7	-0.452653	2.37536	-5.72107	3.98795e-08	1.19691e-06	Significantly downregulated (Adj-P<0.01)
ENSG00000164751.14_PEX2	PEX2	-0.306112	4.64933	-5.74472	3.54001e-08	1.08713e-06	Significantly downregulated (Adj-P<0.01)
ENSG00000186298.11_PPP1CC	PPP1CC	-0.348417	6.88066	-5.74128	3.602e-08	1.10403e-06	Significantly downregulated (Adj-P<0.01)
ENSG00000160111.12_CPAMD8	CPAMD8	-0.823828	2.36356	-5.71349	4.14294e-08	1.23179e-06	Significantly downregulated (Adj-P<0.01)
ENSG00000119689.14_DLST	DLST	-0.35957	6.91156	-5.73374	3.74161e-08	1.13154e-06	Significantly downregulated (Adj-P<0.01)
ENSG00000126953.6_TIMM8A	TIMM8A	-0.538231	2.00789	-5.7039	4.34744e-08	1.28777e-06	Significantly downregulated (Adj-P<0.01)
ENSG00000161558.10_TMEM143	TMEM143	-0.381186	5.9797	-5.73374	3.74147e-08	1.13154e-06	Significantly downregulated (Adj-P<0.01)
ENSG00000140943.16_MBTPS1	MBTPS1	0.218613	4.98316	5.73402	3.73632e-08	1.13154e-06	Significantly upregulated (Adj-P<0.01)
ENSG00000144381.16_HSPD1	HSPD1	-0.34457	6.71605	-5.72997	3.81324e-08	1.15101e-06	Significantly downregulated (Adj-P<0.01)
ENSG00000114867.20_EIF4G1	EIF4G1	-0.291877	8.62192	-5.71905	4.02872e-08	1.2046e-06	Significantly downregulated (Adj-P<0.01)
ENSG00000187583.10_PLEKHN1	PLEKHN1	-0.993989	-0.871034	-5.69756	4.48806e-08	1.32218e-06	Significantly downregulated (Adj-P<0.01)
ENSG00000279089.1_AC005839.1	AC005839.1	1.00323	0.320144	5.74028	3.62031e-08	1.10751e-06	Significantly upregulated (Adj-P<0.01)
ENSG00000138777.19_PPA2	PPA2	-0.411145	4.33127	-5.71977	4.01412e-08	1.20249e-06	Significantly downregulated (Adj-P<0.01)
ENSG00000006042.11_TMEM98	TMEM98	0.845822	0.675179	5.68471	4.78671e-08	1.39703e-06	Significantly upregulated (Adj-P<0.01)
ENSG00000204564.11_C6orf136	C6orf136	-0.433028	4.30537	-5.71525	4.1064e-08	1.22321e-06	Significantly downregulated (Adj-P<0.01)
ENSG00000106105.13_GARS	GARS	-0.329848	4.64962	-5.7155	4.10123e-08	1.22321e-06	Significantly downregulated (Adj-P<0.01)
ENSG00000115128.6_SF3B6	SF3B6	-0.261426	3.87885	-5.70988	4.21884e-08	1.25201e-06	Significantly downregulated (Adj-P<0.01)
ENSG00000204623.9_ZNRD1ASP	ZNRD1ASP	0.505242	3.16678	5.68422	4.79861e-08	1.39742e-06	Significantly upregulated (Adj-P<0.01)
ENSG00000147677.10_EIF3H	EIF3H	-0.278439	6.62393	-5.7009	4.41355e-08	1.30492e-06	Significantly downregulated (Adj-P<0.01)
ENSG00000174021.10_GNG5	GNG5	-0.482826	5.52179	-5.69754	4.48859e-08	1.32218e-06	Significantly downregulated (Adj-P<0.01)
ENSG00000253738.1_OTUD6B-AS1	OTUD6B-AS1	-0.378081	4.68926	-5.69474	4.55204e-08	1.33838e-06	Significantly downregulated (Adj-P<0.01)
ENSG00000120693.13_SMAD9	SMAD9	1.28553	2.69727	5.66107	5.38772e-08	1.53574e-06	Significantly upregulated (Adj-P<0.01)
ENSG00000177463.15_NR2C2	NR2C2	0.404812	5.09601	5.69188	4.61786e-08	1.35523e-06	Significantly upregulated (Adj-P<0.01)
ENSG00000210082.2_MT-RNR2	MT-RNR2	-0.730076	13.7704	-5.65585	5.53014e-08	1.5651e-06	Significantly downregulated (Adj-P<0.01)
ENSG00000132423.11_COQ3	COQ3	-0.496762	3.79046	-5.68392	4.80565e-08	1.39742e-06	Significantly downregulated (Adj-P<0.01)
ENSG00000140876.11_NUDT7	NUDT7	-0.640407	0.764216	-5.65087	5.66939e-08	1.59315e-06	Significantly downregulated (Adj-P<0.01)
ENSG00000154262.12_ABCA6	ABCA6	0.658276	2.75561	5.65658	5.51e-08	1.56218e-06	Significantly upregulated (Adj-P<0.01)
ENSG00000171824.13_EXOSC10	EXOSC10	0.326745	5.01975	5.6883	4.70131e-08	1.37717e-06	Significantly upregulated (Adj-P<0.01)
ENSG00000143653.9_SCCPDH	SCCPDH	-0.24173	5.37051	-5.68696	4.73308e-08	1.38392e-06	Significantly downregulated (Adj-P<0.01)
ENSG00000267257.1_AC105105.1	AC105105.1	2.74046	0.0398427	5.80969	2.54765e-08	8.2871e-07	Significantly upregulated (Adj-P<0.01)
ENSG00000125166.12_GOT2	GOT2	-0.537884	8.61347	-5.67002	5.15198e-08	1.48724e-06	Significantly downregulated (Adj-P<0.01)
ENSG00000048649.13_RSF1	RSF1	0.397991	4.54128	5.67429	5.04315e-08	1.45847e-06	Significantly upregulated (Adj-P<0.01)
ENSG00000144231.10_POLR2D	POLR2D	-0.304734	5.0042	-5.68087	4.87968e-08	1.41636e-06	Significantly downregulated (Adj-P<0.01)
ENSG00000155008.13_APOOL	APOOL	-0.403796	5.28295	-5.67857	4.93622e-08	1.43015e-06	Significantly downregulated (Adj-P<0.01)
ENSG00000218336.8_TENM3	TENM3	0.759046	3.14797	5.64058	5.96793e-08	1.67112e-06	Significantly upregulated (Adj-P<0.01)
ENSG00000134684.10_YARS	YARS	-0.310582	4.38808	-5.66557	5.26783e-08	1.51517e-06	Significantly downregulated (Adj-P<0.01)
ENSG00000165487.13_MICU2	MICU2	-0.306235	5.35675	-5.66761	5.21456e-08	1.50257e-06	Significantly downregulated (Adj-P<0.01)
ENSG00000188342.11_GTF2F2	GTF2F2	-0.368207	4.44783	-5.66371	5.31712e-08	1.52108e-06	Significantly downregulated (Adj-P<0.01)
ENSG00000107290.13_SETX	SETX	0.413912	4.99052	5.66394	5.31103e-08	1.52108e-06	Significantly upregulated (Adj-P<0.01)
ENSG00000133794.17_ARNTL	ARNTL	1.01495	1.75205	5.62436	6.46982e-08	1.79583e-06	Significantly upregulated (Adj-P<0.01)
ENSG00000125633.10_CCDC93	CCDC93	0.321675	4.68219	5.66192	5.36479e-08	1.53196e-06	Significantly upregulated (Adj-P<0.01)
ENSG00000142784.15_WDTC1	WDTC1	-0.272723	6.7174	-5.65983	5.4213e-08	1.54255e-06	Significantly downregulated (Adj-P<0.01)
ENSG00000053747.16_LAMA3	LAMA3	0.915354	1.70304	5.62298	6.51438e-08	1.80504e-06	Significantly upregulated (Adj-P<0.01)
ENSG00000174197.16_MGA	MGA	0.512261	4.09332	5.64756	5.76362e-08	1.61677e-06	Significantly upregulated (Adj-P<0.01)
ENSG00000068383.18_INPP5A	INPP5A	-0.329513	5.81167	-5.6566	5.5093e-08	1.56218e-06	Significantly downregulated (Adj-P<0.01)
ENSG00000185627.17_PSMD13	PSMD13	-0.264411	6.06184	-5.65481	5.5589e-08	1.57044e-06	Significantly downregulated (Adj-P<0.01)
ENSG00000109519.12_GRPEL1	GRPEL1	-0.284783	4.88956	-5.65333	5.60012e-08	1.57706e-06	Significantly downregulated (Adj-P<0.01)
ENSG00000185591.9_SP1	SP1	0.407245	5.42914	5.65325	5.60221e-08	1.57706e-06	Significantly upregulated (Adj-P<0.01)
ENSG00000178502.5_KLHL11	KLHL11	0.721505	1.45366	5.6106	6.9279e-08	1.88994e-06	Significantly upregulated (Adj-P<0.01)
ENSG00000246859.2_STARD4-AS1	STARD4-AS1	1.07159	3.08095	5.61855	6.65968e-08	1.83251e-06	Significantly upregulated (Adj-P<0.01)
ENSG00000162972.10_MAIP1	MAIP1	-0.297287	3.20618	-5.62793	6.35586e-08	1.7735e-06	Significantly downregulated (Adj-P<0.01)
ENSG00000116584.17_ARHGEF2	ARHGEF2	0.461493	3.9405	5.63076	6.26717e-08	1.75183e-06	Significantly upregulated (Adj-P<0.01)
ENSG00000067900.7_ROCK1	ROCK1	0.402118	4.23188	5.62102	6.57812e-08	1.81324e-06	Significantly upregulated (Adj-P<0.01)
ENSG00000255310.2_AF131215.5	AF131215.5	-1.12505	-1.21651	-5.66477	5.28905e-08	1.51852e-06	Significantly downregulated (Adj-P<0.01)
ENSG00000086570.12_FAT2	FAT2	1.50908	-1.28072	5.80948	2.55033e-08	8.2871e-07	Significantly upregulated (Adj-P<0.01)
ENSG00000114902.13_SPCS1	SPCS1	-0.281723	4.39408	-5.62532	6.43913e-08	1.79044e-06	Significantly downregulated (Adj-P<0.01)
ENSG00000132305.20_IMMT	IMMT	-0.404676	7.08116	-5.62175	6.55438e-08	1.81296e-06	Significantly downregulated (Adj-P<0.01)
ENSG00000156469.8_MTERF3	MTERF3	-0.375648	3.29225	-5.6082	7.01094e-08	1.90405e-06	Significantly downregulated (Adj-P<0.01)
ENSG00000156535.14_CD109	CD109	0.9179	1.46854	5.58003	8.06171e-08	2.12389e-06	Significantly upregulated (Adj-P<0.01)
ENSG00000204619.7_PPP1R11	PPP1R11	-0.227968	4.24082	-5.61707	6.70854e-08	1.84276e-06	Significantly downregulated (Adj-P<0.01)
ENSG00000162924.14_REL	REL	0.76486	2.04583	5.57779	8.1513e-08	2.14268e-06	Significantly upregulated (Adj-P<0.01)
ENSG00000003137.8_CYP26B1	CYP26B1	1.68321	0.805699	5.60058	7.28108e-08	1.95935e-06	Significantly upregulated (Adj-P<0.01)
ENSG00000116455.13_WDR77	WDR77	-0.302704	4.71601	-5.61581	6.75087e-08	1.85119e-06	Significantly downregulated (Adj-P<0.01)
ENSG00000172159.15_FRMD3	FRMD3	-0.548214	4.89061	-5.61472	6.78754e-08	1.85803e-06	Significantly downregulated (Adj-P<0.01)
ENSG00000132432.13_SEC61G	SEC61G	-0.499451	4.03211	-5.60441	7.14398e-08	1.93558e-06	Significantly downregulated (Adj-P<0.01)
ENSG00000139726.10_DENR	DENR	-0.260671	5.35767	-5.60807	7.01563e-08	1.90405e-06	Significantly downregulated (Adj-P<0.01)
ENSG00000165548.10_TMEM63C	TMEM63C	2.10214	-0.599993	5.62744	6.37152e-08	1.77475e-06	Significantly upregulated (Adj-P<0.01)
ENSG00000108424.9_KPNB1	KPNB1	-0.220308	6.71513	-5.60181	7.23694e-08	1.95219e-06	Significantly downregulated (Adj-P<0.01)
ENSG00000119707.13_RBM25	RBM25	0.330548	6.24608	5.60355	7.17464e-08	1.94057e-06	Significantly upregulated (Adj-P<0.01)
ENSG00000176087.14_SLC35A4	SLC35A4	-0.225483	6.11471	-5.60166	7.24218e-08	1.95219e-06	Significantly downregulated (Adj-P<0.01)
ENSG00000177200.17_CHD9	CHD9	0.505862	4.83437	5.59631	7.43692e-08	1.99381e-06	Significantly upregulated (Adj-P<0.01)
ENSG00000181555.20_SETD2	SETD2	0.32977	5.2555	5.59919	7.33141e-08	1.96956e-06	Significantly upregulated (Adj-P<0.01)
ENSG00000018189.12_RUFY3	RUFY3	0.376227	4.21958	5.59106	7.63314e-08	2.03683e-06	Significantly upregulated (Adj-P<0.01)
ENSG00000170310.14_STX8	STX8	-0.362753	3.51021	-5.58583	7.83352e-08	2.07981e-06	Significantly downregulated (Adj-P<0.01)
ENSG00000090263.15_MRPS33	MRPS33	-0.391969	5.17629	-5.59604	7.44681e-08	1.99381e-06	Significantly downregulated (Adj-P<0.01)
ENSG00000087302.8_RTRAF	RTRAF	-0.265602	5.57588	-5.59483	7.49184e-08	2.00249e-06	Significantly downregulated (Adj-P<0.01)
ENSG00000144848.10_ATG3	ATG3	-0.262592	3.64431	-5.58248	7.96438e-08	2.11103e-06	Significantly downregulated (Adj-P<0.01)
ENSG00000085063.15_CD59	CD59	-0.258896	8.30132	-5.58061	8.03842e-08	2.12356e-06	Significantly downregulated (Adj-P<0.01)
ENSG00000188039.14_NWD1	NWD1	2.38068	-1.88087	6.07893	6.35452e-09	2.59359e-07	Significantly upregulated (Adj-P<0.01)
ENSG00000115677.16_HDLBP	HDLBP	-0.271429	8.96813	-5.57399	8.30615e-08	2.17151e-06	Significantly downregulated (Adj-P<0.01)
ENSG00000149196.15_HIKESHI	HIKESHI	-0.28073	4.41382	-5.58681	7.79553e-08	2.07505e-06	Significantly downregulated (Adj-P<0.01)
ENSG00000205707.10_ETFRF1	ETFRF1	-0.475951	4.65612	-5.58663	7.80252e-08	2.07505e-06	Significantly downregulated (Adj-P<0.01)
ENSG00000196821.9_C6orf106	C6orf106	-0.345801	8.16516	-5.57376	8.31566e-08	2.17151e-06	Significantly downregulated (Adj-P<0.01)
ENSG00000104805.15_NUCB1	NUCB1	-0.374646	6.62779	-5.58072	8.03411e-08	2.12356e-06	Significantly downregulated (Adj-P<0.01)
ENSG00000125870.10_SNRPB2	SNRPB2	-0.261416	4.07622	-5.57415	8.29947e-08	2.17151e-06	Significantly downregulated (Adj-P<0.01)
ENSG00000162601.9_MYSM1	MYSM1	0.515025	4.67553	5.57541	8.24819e-08	2.16457e-06	Significantly upregulated (Adj-P<0.01)
ENSG00000274750.2_HIST1H3E	HIST1H3E	-1.54899	0.985233	-5.53611	1.00132e-07	2.50362e-06	Significantly downregulated (Adj-P<0.01)
ENSG00000173915.15_ATP5MD	ATP5MD	-0.531487	6.20472	-5.57256	8.36511e-08	2.18084e-06	Significantly downregulated (Adj-P<0.01)
ENSG00000153822.13_KCNJ16	KCNJ16	3.0395	-1.01287	5.95668	1.19971e-08	4.44004e-07	Significantly upregulated (Adj-P<0.01)
ENSG00000162591.15_MEGF6	MEGF6	0.747802	2.98605	5.54759	9.46235e-08	2.40374e-06	Significantly upregulated (Adj-P<0.01)
ENSG00000091483.6_FH	FH	-0.345347	6.72251	-5.56786	8.56163e-08	2.22113e-06	Significantly downregulated (Adj-P<0.01)
ENSG00000150593.17_PDCD4	PDCD4	0.475602	3.51262	5.55246	9.23796e-08	2.36185e-06	Significantly upregulated (Adj-P<0.01)
ENSG00000170854.17_RIOX2	RIOX2	-0.385295	4.59228	-5.5693	8.50111e-08	2.20904e-06	Significantly downregulated (Adj-P<0.01)
ENSG00000111602.11_TIMELESS	TIMELESS	0.580527	1.71654	5.52674	1.04853e-07	2.59713e-06	Significantly upregulated (Adj-P<0.01)
ENSG00000115233.11_PSMD14	PSMD14	-0.299316	5.25852	-5.56986	8.47756e-08	2.20653e-06	Significantly downregulated (Adj-P<0.01)
ENSG00000139180.10_NDUFA9	NDUFA9	-0.401369	6.95708	-5.56392	8.73011e-08	2.25379e-06	Significantly downregulated (Adj-P<0.01)
ENSG00000163617.10_CCDC191	CCDC191	0.704149	0.319946	5.54155	9.74833e-08	2.45048e-06	Significantly upregulated (Adj-P<0.01)
ENSG00000182180.13_MRPS16	MRPS16	-0.297613	6.16741	-5.56544	8.66484e-08	2.24424e-06	Significantly downregulated (Adj-P<0.01)
ENSG00000140092.14_FBLN5	FBLN5	0.650872	3.79487	5.55312	9.20789e-08	2.36177e-06	Significantly upregulated (Adj-P<0.01)
ENSG00000139209.15_SLC38A4	SLC38A4	1.14466	4.11395	5.54841	9.42451e-08	2.40181e-06	Significantly upregulated (Adj-P<0.01)
ENSG00000224051.6_CPTP	CPTP	-0.605597	5.30334	-5.56488	8.68867e-08	2.24674e-06	Significantly downregulated (Adj-P<0.01)
ENSG00000187642.9_PERM1	PERM1	-0.649526	7.9025	-5.55247	9.23735e-08	2.36185e-06	Significantly downregulated (Adj-P<0.01)
ENSG00000205302.6_SNX2	SNX2	-0.235922	4.26208	-5.55815	8.98224e-08	2.31253e-06	Significantly downregulated (Adj-P<0.01)
ENSG00000100100.12_PIK3IP1	PIK3IP1	0.837676	3.87314	5.55028	9.3377e-08	2.38352e-06	Significantly upregulated (Adj-P<0.01)
ENSG00000184076.13_UQCR10	UQCR10	-0.474002	6.59118	-5.55805	8.98676e-08	2.31253e-06	Significantly downregulated (Adj-P<0.01)
ENSG00000143344.15_RGL1	RGL1	1.01252	1.22296	5.51962	1.08591e-07	2.64642e-06	Significantly upregulated (Adj-P<0.01)
ENSG00000148459.15_PDSS1	PDSS1	-0.549686	1.66031	-5.52143	1.0763e-07	2.64119e-06	Significantly downregulated (Adj-P<0.01)
ENSG00000156467.9_UQCRB	UQCRB	-0.460433	8.45936	-5.54505	9.58184e-08	2.41477e-06	Significantly downregulated (Adj-P<0.01)
ENSG00000168743.12_NPNT	NPNT	1.37322	2.31326	5.51442	1.114e-07	2.70856e-06	Significantly upregulated (Adj-P<0.01)
ENSG00000089063.14_TMEM230	TMEM230	-0.254745	5.52921	-5.55734	9.01841e-08	2.31691e-06	Significantly downregulated (Adj-P<0.01)
ENSG00000113971.19_NPHP3	NPHP3	0.408474	3.82492	5.54055	9.79639e-08	2.45714e-06	Significantly upregulated (Adj-P<0.01)
ENSG00000125814.17_NAPB	NAPB	0.410332	2.70389	5.52046	1.08143e-07	2.6456e-06	Significantly upregulated (Adj-P<0.01)
ENSG00000084710.13_EFR3B	EFR3B	-0.810199	3.50898	-5.54143	9.75439e-08	2.45048e-06	Significantly downregulated (Adj-P<0.01)
ENSG00000070018.8_LRP6	LRP6	0.522703	4.9838	5.54641	9.51756e-08	2.40383e-06	Significantly upregulated (Adj-P<0.01)
ENSG00000169740.13_ZNF32	ZNF32	-0.400086	4.70415	-5.54761	9.46167e-08	2.40374e-06	Significantly downregulated (Adj-P<0.01)
ENSG00000141030.12_COPS3	COPS3	-0.265019	5.99094	-5.54686	9.49657e-08	2.40383e-06	Significantly downregulated (Adj-P<0.01)
ENSG00000125863.19_MKKS	MKKS	-0.393923	4.87109	-5.54629	9.52327e-08	2.40383e-06	Significantly downregulated (Adj-P<0.01)
ENSG00000167996.15_FTH1	FTH1	-0.502604	9.50559	-5.51963	1.08583e-07	2.64642e-06	Significantly downregulated (Adj-P<0.01)
ENSG00000072163.19_LIMS2	LIMS2	-0.465017	4.17462	-5.53794	9.92316e-08	2.48502e-06	Significantly downregulated (Adj-P<0.01)
ENSG00000185900.9_POMK	POMK	1.10597	0.0659416	5.53121	1.02575e-07	2.55664e-06	Significantly upregulated (Adj-P<0.01)
ENSG00000169967.16_MAP3K2	MAP3K2	0.507559	4.90394	5.53506	1.00648e-07	2.51255e-06	Significantly upregulated (Adj-P<0.01)
ENSG00000131148.8_EMC8	EMC8	-0.279701	3.28722	-5.52075	1.07989e-07	2.6456e-06	Significantly downregulated (Adj-P<0.01)
ENSG00000283293.1_RN7SK	RN7SK	-1.4668	1.51735	-5.51946	1.08677e-07	2.64642e-06	Significantly downregulated (Adj-P<0.01)
ENSG00000136153.19_LMO7	LMO7	0.391682	7.30715	5.53045	1.02961e-07	2.56224e-06	Significantly upregulated (Adj-P<0.01)
ENSG00000102780.16_DGKH	DGKH	0.673516	2.62266	5.5001	1.19506e-07	2.87484e-06	Significantly upregulated (Adj-P<0.01)
ENSG00000067082.14_KLF6	KLF6	0.568164	4.76325	5.52803	1.04194e-07	2.58888e-06	Significantly upregulated (Adj-P<0.01)
ENSG00000260257.2_AL035071.1	AL035071.1	-0.756747	0.544155	-5.49087	1.25031e-07	2.97618e-06	Significantly downregulated (Adj-P<0.01)
ENSG00000185246.17_PRPF39	PRPF39	0.435789	4.21266	5.52223	1.07208e-07	2.6349e-06	Significantly upregulated (Adj-P<0.01)
ENSG00000162885.12_B3GALNT2	B3GALNT2	0.519676	4.65084	5.52589	1.05295e-07	2.604e-06	Significantly upregulated (Adj-P<0.01)
ENSG00000177692.11_DNAJC28	DNAJC28	-0.565288	1.21467	-5.48365	1.2953e-07	3.07406e-06	Significantly downregulated (Adj-P<0.01)
ENSG00000055609.17_KMT2C	KMT2C	0.527244	6.25847	5.52739	1.04519e-07	2.5929e-06	Significantly upregulated (Adj-P<0.01)
ENSG00000134186.11_PRPF38B	PRPF38B	0.273896	4.71819	5.52363	1.06469e-07	2.62169e-06	Significantly upregulated (Adj-P<0.01)
ENSG00000050405.13_LIMA1	LIMA1	0.505295	4.82437	5.52356	1.06506e-07	2.62169e-06	Significantly upregulated (Adj-P<0.01)
ENSG00000141736.13_ERBB2	ERBB2	0.363701	5.00387	5.52467	1.05929e-07	2.61561e-06	Significantly upregulated (Adj-P<0.01)
ENSG00000078668.13_VDAC3	VDAC3	-0.316241	8.45104	-5.51095	1.13314e-07	2.75091e-06	Significantly downregulated (Adj-P<0.01)
ENSG00000113083.13_LOX	LOX	1.27534	0.475436	5.49315	1.23648e-07	2.94768e-06	Significantly upregulated (Adj-P<0.01)
ENSG00000133619.17_KRBA1	KRBA1	-0.590988	2.63585	-5.48914	1.26097e-07	2.99707e-06	Significantly downregulated (Adj-P<0.01)
ENSG00000177551.5_NHLH2	NHLH2	3.58947	-2.24777	6.17462	3.84215e-09	1.733e-07	Significantly upregulated (Adj-P<0.01)
ENSG00000125772.12_GPCPD1	GPCPD1	-0.588769	4.0605	-5.50369	1.1742e-07	2.84188e-06	Significantly downregulated (Adj-P<0.01)
ENSG00000128626.11_MRPS12	MRPS12	-0.532466	3.77451	-5.50205	1.18367e-07	2.85977e-06	Significantly downregulated (Adj-P<0.01)
ENSG00000027001.9_MIPEP	MIPEP	-0.417596	3.38863	-5.49395	1.23159e-07	2.94488e-06	Significantly downregulated (Adj-P<0.01)
ENSG00000117724.12_CENPF	CENPF	1.30861	-1.24976	5.61337	6.8331e-08	1.86728e-06	Significantly upregulated (Adj-P<0.01)
ENSG00000112297.14_CRYBG1	CRYBG1	0.835978	1.11169	5.46317	1.43159e-07	3.37092e-06	Significantly upregulated (Adj-P<0.01)
ENSG00000109390.11_NDUFC1	NDUFC1	-0.431103	6.30644	-5.50495	1.16699e-07	2.82874e-06	Significantly downregulated (Adj-P<0.01)
ENSG00000116117.17_PARD3B	PARD3B	0.434815	2.59116	5.47146	1.37484e-07	3.25312e-06	Significantly upregulated (Adj-P<0.01)
ENSG00000116754.13_SRSF11	SRSF11	0.323427	6.56664	5.50179	1.18519e-07	2.85977e-06	Significantly upregulated (Adj-P<0.01)
ENSG00000168398.6_BDKRB2	BDKRB2	2.11393	-1.47941	5.73576	3.70375e-08	1.12652e-06	Significantly upregulated (Adj-P<0.01)
ENSG00000160097.17_FNDC5	FNDC5	-0.776939	7.34469	-5.49465	1.22737e-07	2.9392e-06	Significantly downregulated (Adj-P<0.01)
ENSG00000225339.3_AL354740.1	AL354740.1	-0.677357	6.01164	-5.50062	1.19199e-07	2.87181e-06	Significantly downregulated (Adj-P<0.01)
ENSG00000175984.14_DENND2C	DENND2C	0.744594	7.11553	5.49588	1.22003e-07	2.92604e-06	Significantly upregulated (Adj-P<0.01)
ENSG00000110013.12_SIAE	SIAE	-0.326288	4.86201	-5.49963	1.1978e-07	2.87708e-06	Significantly downregulated (Adj-P<0.01)
ENSG00000284526.1_AC015802.6	AC015802.6	-0.867593	0.15372	-5.45365	1.49964e-07	3.51178e-06	Significantly downregulated (Adj-P<0.01)
ENSG00000106588.10_PSMA2	PSMA2	-0.262627	5.6829	-5.49351	1.23427e-07	2.94683e-06	Significantly downregulated (Adj-P<0.01)
ENSG00000144847.12_IGSF11	IGSF11	0.800291	1.6286	5.44431	1.56943e-07	3.64297e-06	Significantly upregulated (Adj-P<0.01)
ENSG00000103042.8_SLC38A7	SLC38A7	-0.441098	3.26855	-5.47069	1.38001e-07	3.26047e-06	Significantly downregulated (Adj-P<0.01)
ENSG00000106415.12_GLCCI1	GLCCI1	0.640049	2.11243	5.43904	1.61018e-07	3.71581e-06	Significantly upregulated (Adj-P<0.01)
ENSG00000127241.16_MASP1	MASP1	-1.04334	3.27002	-5.46768	1.40044e-07	3.30383e-06	Significantly downregulated (Adj-P<0.01)
ENSG00000161057.11_PSMC2	PSMC2	-0.204745	6.28076	-5.47859	1.32772e-07	3.1463e-06	Significantly downregulated (Adj-P<0.01)
ENSG00000188582.8_PAQR9	PAQR9	-0.99632	1.03047	-5.42851	1.69478e-07	3.88845e-06	Significantly downregulated (Adj-P<0.01)
ENSG00000105875.13_WDR91	WDR91	0.383596	2.91028	5.44312	1.57854e-07	3.65875e-06	Significantly upregulated (Adj-P<0.01)
ENSG00000205056.8_LINC02397	LINC02397	1.57573	-1.0829	5.57991	8.06643e-08	2.12389e-06	Significantly upregulated (Adj-P<0.01)
ENSG00000065413.19_ANKRD44	ANKRD44	0.674313	2.34192	5.42928	1.6884e-07	3.87942e-06	Significantly upregulated (Adj-P<0.01)
ENSG00000131174.5_COX7B	COX7B	-0.53434	7.48659	-5.45578	1.4841e-07	3.48051e-06	Significantly downregulated (Adj-P<0.01)
ENSG00000184182.18_UBE2F	UBE2F	-0.276446	4.52625	-5.46295	1.43313e-07	3.37092e-06	Significantly downregulated (Adj-P<0.01)
ENSG00000141452.9_RMC1	RMC1	-0.399007	2.16058	-5.42515	1.72264e-07	3.93523e-06	Significantly downregulated (Adj-P<0.01)
ENSG00000241837.6_ATP5PO	ATP5PO	-0.402079	7.62881	-5.45231	1.50941e-07	3.52945e-06	Significantly downregulated (Adj-P<0.01)
ENSG00000068796.16_KIF2A	KIF2A	0.586616	1.65737	5.41337	1.82401e-07	4.12532e-06	Significantly upregulated (Adj-P<0.01)
ENSG00000164442.9_CITED2	CITED2	0.829374	5.22327	5.45689	1.47613e-07	3.46695e-06	Significantly upregulated (Adj-P<0.01)
ENSG00000137033.11_IL33	IL33	0.925962	1.98368	5.41177	1.83813e-07	4.14813e-06	Significantly upregulated (Adj-P<0.01)
ENSG00000117118.9_SDHB	SDHB	-0.397973	6.83789	-5.45116	1.51795e-07	3.54419e-06	Significantly downregulated (Adj-P<0.01)
ENSG00000109971.13_HSPA8	HSPA8	-0.396237	9.6081	-5.43399	1.65023e-07	3.7972e-06	Significantly downregulated (Adj-P<0.01)
ENSG00000148481.13_MINDY3	MINDY3	-0.468676	2.58554	-5.42455	1.72763e-07	3.93539e-06	Significantly downregulated (Adj-P<0.01)
ENSG00000101247.17_NDUFAF5	NDUFAF5	-0.393584	4.17028	-5.44806	1.54102e-07	3.5875e-06	Significantly downregulated (Adj-P<0.01)
ENSG00000083857.13_FAT1	FAT1	0.907896	1.92362	5.40331	1.91512e-07	4.27055e-06	Significantly upregulated (Adj-P<0.01)
ENSG00000169139.11_UBE2V2	UBE2V2	-0.312938	5.21742	-5.44685	1.55009e-07	3.60332e-06	Significantly downregulated (Adj-P<0.01)
ENSG00000135250.16_SRPK2	SRPK2	0.338402	3.53542	5.4234	1.73737e-07	3.9519e-06	Significantly upregulated (Adj-P<0.01)
ENSG00000010256.10_UQCRC1	UQCRC1	-0.397146	8.73945	-5.42685	1.70848e-07	3.91421e-06	Significantly downregulated (Adj-P<0.01)
ENSG00000115183.14_TANC1	TANC1	0.643374	3.02417	5.41164	1.83932e-07	4.14813e-06	Significantly upregulated (Adj-P<0.01)
ENSG00000132676.15_DAP3	DAP3	-0.229273	5.37799	-5.43962	1.60562e-07	3.71069e-06	Significantly downregulated (Adj-P<0.01)
ENSG00000152894.14_PTPRK	PTPRK	0.488498	2.74021	5.40385	1.91008e-07	4.26778e-06	Significantly upregulated (Adj-P<0.01)
ENSG00000150995.19_ITPR1	ITPR1	0.660316	2.28848	5.39541	1.98976e-07	4.3877e-06	Significantly upregulated (Adj-P<0.01)
ENSG00000100348.9_TXN2	TXN2	-0.319124	6.09905	-5.435	1.64209e-07	3.78396e-06	Significantly downregulated (Adj-P<0.01)
ENSG00000117425.13_PTCH2	PTCH2	0.711925	1.34035	5.38363	2.10637e-07	4.58122e-06	Significantly upregulated (Adj-P<0.01)
ENSG00000118412.12_CASP8AP2	CASP8AP2	0.506742	3.62982	5.40442	1.90485e-07	4.26778e-06	Significantly upregulated (Adj-P<0.01)
ENSG00000146005.3_PSD2	PSD2	2.56491	-1.33539	5.72122	3.98497e-08	1.19691e-06	Significantly upregulated (Adj-P<0.01)
ENSG00000008513.15_ST3GAL1	ST3GAL1	-0.486374	6.32229	-5.42565	1.71849e-07	3.93147e-06	Significantly downregulated (Adj-P<0.01)
ENSG00000038219.12_BOD1L1	BOD1L1	0.473367	5.00307	5.42227	1.74687e-07	3.96782e-06	Significantly upregulated (Adj-P<0.01)
ENSG00000134153.9_EMC7	EMC7	-0.288487	4.50217	-5.42486	1.72509e-07	3.93523e-06	Significantly downregulated (Adj-P<0.01)
ENSG00000160310.17_PRMT2	PRMT2	0.34751	4.05467	5.41828	1.78103e-07	4.03964e-06	Significantly upregulated (Adj-P<0.01)
ENSG00000164182.10_NDUFAF2	NDUFAF2	-0.341333	3.73786	-5.40978	1.85601e-07	4.17984e-06	Significantly downregulated (Adj-P<0.01)
ENSG00000112852.6_PCDHB2	PCDHB2	1.0038	-0.52789	5.45058	1.52224e-07	3.54898e-06	Significantly upregulated (Adj-P<0.01)
ENSG00000088888.17_MAVS	MAVS	-0.386791	7.69039	-5.40482	1.90113e-07	4.26778e-06	Significantly downregulated (Adj-P<0.01)
ENSG00000111802.13_TDP2	TDP2	-0.307044	3.52588	-5.39792	1.96576e-07	4.34686e-06	Significantly downregulated (Adj-P<0.01)
ENSG00000254445.1_HSPB2-C11orf52	HSPB2-C11orf52	0.691723	4.16659	5.40251	1.92249e-07	4.27716e-06	Significantly upregulated (Adj-P<0.01)
ENSG00000178425.13_NT5DC1	NT5DC1	-0.364333	4.23052	-5.40241	1.92347e-07	4.27716e-06	Significantly downregulated (Adj-P<0.01)
ENSG00000102870.5_ZNF629	ZNF629	-0.452799	4.11751	-5.40373	1.91119e-07	4.26778e-06	Significantly downregulated (Adj-P<0.01)
ENSG00000174446.12_SNAPC5	SNAPC5	-0.389254	3.64775	-5.39548	1.9891e-07	4.3877e-06	Significantly downregulated (Adj-P<0.01)
ENSG00000085871.8_MGST2	MGST2	-0.358125	4.24303	-5.40378	1.91071e-07	4.26778e-06	Significantly downregulated (Adj-P<0.01)
ENSG00000079385.21_CEACAM1	CEACAM1	-0.785637	0.436946	-5.36079	2.35165e-07	5.03196e-06	Significantly downregulated (Adj-P<0.01)
ENSG00000205352.10_PRR13	PRR13	-0.431314	3.2292	-5.38748	2.06755e-07	4.51534e-06	Significantly downregulated (Adj-P<0.01)
ENSG00000198786.2_MT-ND5	MT-ND5	-0.790217	12.4668	-5.36533	2.30082e-07	4.93651e-06	Significantly downregulated (Adj-P<0.01)
ENSG00000185104.19_FAF1	FAF1	-0.259015	5.92325	-5.40145	1.93245e-07	4.29111e-06	Significantly downregulated (Adj-P<0.01)
ENSG00000143612.20_C1orf43	C1orf43	-0.257985	7.70873	-5.39256	2.01741e-07	4.43021e-06	Significantly downregulated (Adj-P<0.01)
ENSG00000164040.16_PGRMC2	PGRMC2	-0.418052	4.93589	-5.40004	1.94566e-07	4.30839e-06	Significantly downregulated (Adj-P<0.01)
ENSG00000121753.12_ADGRB2	ADGRB2	1.42315	0.375274	5.37083	2.24061e-07	4.8269e-06	Significantly upregulated (Adj-P<0.01)
ENSG00000154518.9_ATP5MC3	ATP5MC3	-0.573939	7.43762	-5.38824	2.05996e-07	4.50496e-06	Significantly downregulated (Adj-P<0.01)
ENSG00000146731.10_CCT6A	CCT6A	-0.262595	6.32416	-5.39446	1.99888e-07	4.40168e-06	Significantly downregulated (Adj-P<0.01)
ENSG00000177239.14_MAN1B1	MAN1B1	0.356735	4.54835	5.39275	2.01553e-07	4.43021e-06	Significantly upregulated (Adj-P<0.01)
ENSG00000131378.13_RFTN1	RFTN1	-0.685557	4.05231	-5.39072	2.03543e-07	4.46361e-06	Significantly downregulated (Adj-P<0.01)
ENSG00000135164.18_DMTF1	DMTF1	0.366379	4.46029	5.38833	2.05903e-07	4.50496e-06	Significantly upregulated (Adj-P<0.01)
ENSG00000180228.12_PRKRA	PRKRA	-0.270327	5.7437	-5.38695	2.0728e-07	4.52058e-06	Significantly downregulated (Adj-P<0.01)
ENSG00000133059.16_DSTYK	DSTYK	0.333349	4.19431	5.37669	2.17811e-07	4.7243e-06	Significantly upregulated (Adj-P<0.01)
ENSG00000178307.9_TMEM11	TMEM11	-0.389068	5.33951	-5.3837	2.10567e-07	4.58122e-06	Significantly downregulated (Adj-P<0.01)
ENSG00000175600.15_SUGCT	SUGCT	-0.454029	2.1916	-5.34612	2.52371e-07	5.29422e-06	Significantly downregulated (Adj-P<0.01)
ENSG00000176563.9_CNTD1	CNTD1	-0.84237	-0.48591	-5.35552	2.41208e-07	5.12309e-06	Significantly downregulated (Adj-P<0.01)
ENSG00000095485.17_CWF19L1	CWF19L1	-0.321007	3.35564	-5.35986	2.36222e-07	5.041e-06	Significantly downregulated (Adj-P<0.01)
ENSG00000279364.1_AC114546.3	AC114546.3	-0.539483	3.56813	-5.36222	2.3355e-07	5.00416e-06	Significantly downregulated (Adj-P<0.01)
ENSG00000134049.5_IER3IP1	IER3IP1	-0.306165	5.20737	-5.37503	2.19567e-07	4.75588e-06	Significantly downregulated (Adj-P<0.01)
ENSG00000112651.11_MRPL2	MRPL2	-0.348642	4.93019	-5.37443	2.20205e-07	4.76321e-06	Significantly downregulated (Adj-P<0.01)
ENSG00000262814.7_MRPL12	MRPL12	-0.54445	5.8134	-5.37185	2.22965e-07	4.8098e-06	Significantly downregulated (Adj-P<0.01)
ENSG00000185630.18_PBX1	PBX1	0.431253	5.83876	5.3735	2.21193e-07	4.77807e-06	Significantly upregulated (Adj-P<0.01)
ENSG00000197467.14_COL13A1	COL13A1	1.08759	0.170415	5.34268	2.56575e-07	5.36006e-06	Significantly upregulated (Adj-P<0.01)
ENSG00000162377.5_COA7	COA7	-0.38251	4.24654	-5.36813	2.26994e-07	4.87683e-06	Significantly downregulated (Adj-P<0.01)
ENSG00000114686.8_MRPL3	MRPL3	-0.226364	5.3294	-5.37045	2.24467e-07	4.82909e-06	Significantly downregulated (Adj-P<0.01)
ENSG00000157259.7_GATAD1	GATAD1	0.325213	4.17773	5.35854	2.37734e-07	5.06645e-06	Significantly upregulated (Adj-P<0.01)
ENSG00000163743.13_RCHY1	RCHY1	-0.365573	4.42839	-5.35999	2.36071e-07	5.041e-06	Significantly downregulated (Adj-P<0.01)
ENSG00000260401.1_AP002761.4	AP002761.4	-0.51656	3.55872	-5.34829	2.49751e-07	5.25204e-06	Significantly downregulated (Adj-P<0.01)
ENSG00000164056.10_SPRY1	SPRY1	0.401362	4.26822	5.35193	2.4542e-07	5.18155e-06	Significantly upregulated (Adj-P<0.01)
ENSG00000116521.10_SCAMP3	SCAMP3	-0.292335	4.81821	-5.3579	2.38467e-07	5.07525e-06	Significantly downregulated (Adj-P<0.01)
ENSG00000138764.14_CCNG2	CCNG2	0.771501	3.44086	5.33318	2.68553e-07	5.57361e-06	Significantly upregulated (Adj-P<0.01)
ENSG00000164292.12_RHOBTB3	RHOBTB3	0.374274	5.07432	5.35213	2.4518e-07	5.18155e-06	Significantly upregulated (Adj-P<0.01)
ENSG00000121988.17_ZRANB3	ZRANB3	0.502097	1.83149	5.3033	3.09885e-07	6.35665e-06	Significantly upregulated (Adj-P<0.01)
ENSG00000131051.22_RBM39	RBM39	0.279324	6.94485	5.34914	2.48729e-07	5.2375e-06	Significantly upregulated (Adj-P<0.01)
ENSG00000113312.10_TTC1	TTC1	-0.251906	5.30073	-5.35278	2.44416e-07	5.17412e-06	Significantly downregulated (Adj-P<0.01)
ENSG00000138735.15_PDE5A	PDE5A	0.742419	4.14323	5.33767	2.62834e-07	5.46922e-06	Significantly upregulated (Adj-P<0.01)
ENSG00000131100.12_ATP6V1E1	ATP6V1E1	-0.242214	5.96867	-5.34925	2.48597e-07	5.2375e-06	Significantly downregulated (Adj-P<0.01)
ENSG00000163866.8_SMIM12	SMIM12	-0.378632	4.01404	-5.34427	2.54622e-07	5.32625e-06	Significantly downregulated (Adj-P<0.01)
ENSG00000025039.14_RRAGD	RRAGD	-0.31957	7.04938	-5.34225	2.57111e-07	5.36418e-06	Significantly downregulated (Adj-P<0.01)
ENSG00000196628.16_TCF4	TCF4	0.45516	5.20747	5.34514	2.53561e-07	5.31106e-06	Significantly upregulated (Adj-P<0.01)
ENSG00000004478.7_FKBP4	FKBP4	-0.406391	5.86871	-5.34608	2.52423e-07	5.29422e-06	Significantly downregulated (Adj-P<0.01)
ENSG00000247092.6_SNHG10	SNHG10	0.503621	1.37875	5.2955	3.21656e-07	6.53161e-06	Significantly upregulated (Adj-P<0.01)
ENSG00000142949.16_PTPRF	PTPRF	1.52217	1.75143	5.29176	3.27454e-07	6.63137e-06	Significantly upregulated (Adj-P<0.01)
ENSG00000005100.12_DHX33	DHX33	0.30872	3.30792	5.31962	2.86599e-07	5.91721e-06	Significantly upregulated (Adj-P<0.01)
ENSG00000134375.10_TIMM17A	TIMM17A	-0.315738	5.70151	-5.33934	2.6073e-07	5.43256e-06	Significantly downregulated (Adj-P<0.01)
ENSG00000173230.15_GOLGB1	GOLGB1	0.365741	5.12271	5.3373	2.63297e-07	5.47169e-06	Significantly upregulated (Adj-P<0.01)
ENSG00000125388.19_GRK4	GRK4	-0.383957	1.83274	-5.29547	3.21705e-07	6.53161e-06	Significantly downregulated (Adj-P<0.01)
ENSG00000144034.14_TPRKB	TPRKB	-0.40521	3.82208	-5.32616	2.77755e-07	5.74956e-06	Significantly downregulated (Adj-P<0.01)
ENSG00000089041.16_P2RX7	P2RX7	1.3457	-0.68858	5.38205	2.12247e-07	4.60992e-06	Significantly upregulated (Adj-P<0.01)
ENSG00000174574.15_AKIRIN1	AKIRIN1	-0.382652	3.96015	-5.32261	2.82519e-07	5.84056e-06	Significantly downregulated (Adj-P<0.01)
ENSG00000073331.17_ALPK1	ALPK1	0.76926	1.27298	5.27863	3.48629e-07	6.97126e-06	Significantly upregulated (Adj-P<0.01)
ENSG00000181800.5_CELF2-AS1	CELF2-AS1	2.57304	-1.4349	5.60858	6.99775e-08	1.90405e-06	Significantly upregulated (Adj-P<0.01)
ENSG00000143546.9_S100A8	S100A8	-2.55457	-1.21399	-5.35539	2.4136e-07	5.12309e-06	Significantly downregulated (Adj-P<0.01)
ENSG00000176124.12_DLEU1	DLEU1	-0.608675	1.1615	-5.26951	3.64097e-07	7.23501e-06	Significantly downregulated (Adj-P<0.01)
ENSG00000197779.13_ZNF81	ZNF81	0.821137	0.554183	5.27925	3.47592e-07	6.9593e-06	Significantly upregulated (Adj-P<0.01)
ENSG00000162889.10_MAPKAPK2	MAPKAPK2	-0.338442	6.83698	-5.31374	2.94791e-07	6.07056e-06	Significantly downregulated (Adj-P<0.01)
ENSG00000267508.5_ZNF285	ZNF285	0.636572	1.22175	5.26667	3.69062e-07	7.32449e-06	Significantly upregulated (Adj-P<0.01)
ENSG00000125967.16_NECAB3	NECAB3	-0.370845	5.41217	-5.31709	2.90094e-07	5.98159e-06	Significantly downregulated (Adj-P<0.01)
ENSG00000150637.8_CD226	CD226	0.911833	0.0118739	5.2986	3.1693e-07	6.49277e-06	Significantly upregulated (Adj-P<0.01)
ENSG00000185689.16_C6orf201	C6orf201	1.72492	-0.925291	5.44233	1.58459e-07	3.66743e-06	Significantly upregulated (Adj-P<0.01)
ENSG00000185274.11_GALNT17	GALNT17	2.13505	0.31711	5.32927	2.7364e-07	5.67178e-06	Significantly upregulated (Adj-P<0.01)
ENSG00000158882.14_TOMM40L	TOMM40L	-0.518912	4.50879	-5.31129	2.98262e-07	6.13408e-06	Significantly downregulated (Adj-P<0.01)
ENSG00000146122.16_DAAM2	DAAM2	-0.841563	5.09706	-5.3098	3.00408e-07	6.17021e-06	Significantly downregulated (Adj-P<0.01)
ENSG00000172986.12_GXYLT2	GXYLT2	1.52004	-1.02425	5.41681	1.79375e-07	4.06269e-06	Significantly upregulated (Adj-P<0.01)
ENSG00000172331.11_BPGM	BPGM	-0.490867	3.87281	-5.29729	3.18916e-07	6.51487e-06	Significantly downregulated (Adj-P<0.01)
ENSG00000135775.13_COG2	COG2	-0.276466	4.01566	-5.29763	3.18398e-07	6.51444e-06	Significantly downregulated (Adj-P<0.01)
ENSG00000249709.7_ZNF564	ZNF564	-0.355843	2.43547	-5.26563	3.70893e-07	7.34642e-06	Significantly downregulated (Adj-P<0.01)
ENSG00000226314.8_ZNF192P1	ZNF192P1	0.88024	0.227787	5.27355	3.57167e-07	7.1151e-06	Significantly upregulated (Adj-P<0.01)
ENSG00000114757.18_PEX5L	PEX5L	0.943187	0.549438	5.26551	3.71092e-07	7.34642e-06	Significantly upregulated (Adj-P<0.01)
ENSG00000151366.12_NDUFC2	NDUFC2	-0.30595	6.60214	-5.29708	3.1924e-07	6.51487e-06	Significantly downregulated (Adj-P<0.01)
ENSG00000156017.12_CARNMT1	CARNMT1	-0.422357	3.31817	-5.27784	3.49941e-07	6.98869e-06	Significantly downregulated (Adj-P<0.01)
ENSG00000106771.12_TMEM245	TMEM245	0.4944	6.64348	5.29554	3.21597e-07	6.53161e-06	Significantly upregulated (Adj-P<0.01)
ENSG00000123505.15_AMD1	AMD1	-0.415235	4.44555	-5.2926	3.26149e-07	6.61338e-06	Significantly downregulated (Adj-P<0.01)
ENSG00000089916.17_GPATCH2L	GPATCH2L	0.339645	5.26071	5.29572	3.21324e-07	6.53161e-06	Significantly upregulated (Adj-P<0.01)
ENSG00000156508.17_EEF1A1	EEF1A1	0.719371	8.89608	5.27999	3.46375e-07	6.94368e-06	Significantly upregulated (Adj-P<0.01)
ENSG00000256269.8_HMBS	HMBS	-0.435683	3.9447	-5.2888	3.32108e-07	6.7085e-06	Significantly downregulated (Adj-P<0.01)
ENSG00000123200.16_ZC3H13	ZC3H13	0.335978	5.51341	5.29089	3.2882e-07	6.65055e-06	Significantly upregulated (Adj-P<0.01)
ENSG00000171456.18_ASXL1	ASXL1	0.415892	5.6828	5.2879	3.3355e-07	6.72907e-06	Significantly upregulated (Adj-P<0.01)
ENSG00000198954.7_KIF1BP	KIF1BP	-0.376079	4.84825	-5.28696	3.35045e-07	6.75064e-06	Significantly downregulated (Adj-P<0.01)
ENSG00000108239.8_TBC1D12	TBC1D12	0.426957	2.70411	5.24998	3.99537e-07	7.83272e-06	Significantly upregulated (Adj-P<0.01)
ENSG00000166704.11_ZNF606	ZNF606	0.357838	2.93768	5.25393	3.92104e-07	7.71429e-06	Significantly upregulated (Adj-P<0.01)
ENSG00000107341.4_UBE2R2	UBE2R2	-0.270034	5.82029	-5.28589	3.36762e-07	6.77664e-06	Significantly downregulated (Adj-P<0.01)
ENSG00000115525.17_ST3GAL5	ST3GAL5	-0.454915	4.00088	-5.2758	3.53353e-07	7.04798e-06	Significantly downregulated (Adj-P<0.01)
ENSG00000129204.16_USP6	USP6	0.934341	6.72861	5.28196	3.43131e-07	6.88735e-06	Significantly upregulated (Adj-P<0.01)
ENSG00000129255.15_MPDU1	MPDU1	-0.417554	2.88994	-5.25945	3.8195e-07	7.54256e-06	Significantly downregulated (Adj-P<0.01)
ENSG00000125037.12_EMC3	EMC3	-0.368291	5.51209	-5.2835	3.40616e-07	6.84552e-06	Significantly downregulated (Adj-P<0.01)
ENSG00000145431.10_PDGFC	PDGFC	0.679525	2.4348	5.23716	4.24587e-07	8.20093e-06	Significantly upregulated (Adj-P<0.01)
ENSG00000272884.1_AC113189.4	AC113189.4	-1.16574	0.415368	-5.22652	4.46532e-07	8.54237e-06	Significantly downregulated (Adj-P<0.01)
ENSG00000240764.3_PCDHGC5	PCDHGC5	1.26055	0.42481	5.24994	3.99603e-07	7.83272e-06	Significantly upregulated (Adj-P<0.01)
ENSG00000153015.15_CWC27	CWC27	-0.270987	3.70747	-5.2579	3.84783e-07	7.58907e-06	Significantly downregulated (Adj-P<0.01)
ENSG00000120992.17_LYPLA1	LYPLA1	-0.433534	5.30468	-5.27263	3.58731e-07	7.13731e-06	Significantly downregulated (Adj-P<0.01)
ENSG00000183134.4_PTGDR2	PTGDR2	-0.927867	1.7544	-5.22555	4.48579e-07	8.5705e-06	Significantly downregulated (Adj-P<0.01)
ENSG00000105053.10_VRK3	VRK3	-0.261618	3.46032	-5.25543	3.89314e-07	7.66891e-06	Significantly downregulated (Adj-P<0.01)
ENSG00000081760.16_AACS	AACS	-0.557485	2.45976	-5.23894	4.21025e-07	8.17191e-06	Significantly downregulated (Adj-P<0.01)
ENSG00000143742.12_SRP9	SRP9	-0.229068	6.99051	-5.26387	3.73998e-07	7.39473e-06	Significantly downregulated (Adj-P<0.01)
ENSG00000104447.12_TRPS1	TRPS1	0.518368	2.6259	5.22173	4.56766e-07	8.68085e-06	Significantly upregulated (Adj-P<0.01)
ENSG00000111271.14_ACAD10	ACAD10	-0.278529	3.99213	-5.24948	4.00472e-07	7.84007e-06	Significantly downregulated (Adj-P<0.01)
ENSG00000169242.11_EFNA1	EFNA1	-0.597646	1.6873	-5.21208	4.78088e-07	9.0472e-06	Significantly downregulated (Adj-P<0.01)
ENSG00000137872.16_SEMA6D	SEMA6D	0.813782	4.31866	5.24576	4.07618e-07	7.95471e-06	Significantly upregulated (Adj-P<0.01)
ENSG00000155959.10_VBP1	VBP1	-0.272832	5.88491	-5.25113	3.9735e-07	7.80783e-06	Significantly downregulated (Adj-P<0.01)
ENSG00000175203.15_DCTN2	DCTN2	-0.195582	5.55422	-5.24823	4.02867e-07	7.87724e-06	Significantly downregulated (Adj-P<0.01)
ENSG00000153914.15_SREK1	SREK1	0.352852	5.41603	5.24565	4.07831e-07	7.95471e-06	Significantly upregulated (Adj-P<0.01)
ENSG00000198265.11_HELZ	HELZ	0.456644	5.21827	5.24277	4.13435e-07	8.05412e-06	Significantly upregulated (Adj-P<0.01)
ENSG00000166750.9_SLFN5	SLFN5	0.900283	4.47873	5.23251	4.3404e-07	8.35304e-06	Significantly upregulated (Adj-P<0.01)
ENSG00000198521.11_ZNF43	ZNF43	-0.740917	1.4406	-5.19029	5.29857e-07	9.89711e-06	Significantly downregulated (Adj-P<0.01)
ENSG00000123106.10_CCDC91	CCDC91	-0.35791	4.48393	-5.23858	4.21743e-07	8.17584e-06	Significantly downregulated (Adj-P<0.01)
ENSG00000138381.9_ASNSD1	ASNSD1	-0.271606	5.43913	-5.24144	4.16053e-07	8.09518e-06	Significantly downregulated (Adj-P<0.01)
ENSG00000113387.11_SUB1	SUB1	-0.289508	5.98357	-5.23951	4.1989e-07	8.15984e-06	Significantly downregulated (Adj-P<0.01)
ENSG00000100138.14_SNU13	SNU13	-0.247299	6.0558	-5.2383	4.22299e-07	8.17664e-06	Significantly downregulated (Adj-P<0.01)
ENSG00000100519.11_PSMC6	PSMC6	-0.233768	5.79883	-5.23789	4.23116e-07	8.18248e-06	Significantly downregulated (Adj-P<0.01)
ENSG00000068903.19_SIRT2	SIRT2	-0.314788	7.60913	-5.22682	4.45895e-07	8.54237e-06	Significantly downregulated (Adj-P<0.01)
ENSG00000156671.13_SAMD8	SAMD8	0.476363	5.19016	5.23475	4.29461e-07	8.27495e-06	Significantly upregulated (Adj-P<0.01)
ENSG00000166352.15_C11orf74	C11orf74	-0.320539	3.24508	-5.21494	4.71673e-07	8.94713e-06	Significantly downregulated (Adj-P<0.01)
ENSG00000140990.14_NDUFB10	NDUFB10	-0.459505	7.41089	-5.22449	4.50841e-07	8.58273e-06	Significantly downregulated (Adj-P<0.01)
ENSG00000140262.17_TCF12	TCF12	0.324407	4.41458	5.2265	4.46568e-07	8.54237e-06	Significantly upregulated (Adj-P<0.01)
ENSG00000165055.15_METTL2B	METTL2B	-0.258226	4.11287	-5.22481	4.50171e-07	8.58273e-06	Significantly downregulated (Adj-P<0.01)
ENSG00000156599.10_ZDHHC5	ZDHHC5	-0.294306	5.55689	-5.23138	4.36373e-07	8.38777e-06	Significantly downregulated (Adj-P<0.01)
ENSG00000196557.12_CACNA1H	CACNA1H	-0.632716	2.53985	-5.19979	5.06653e-07	9.50843e-06	Significantly downregulated (Adj-P<0.01)
ENSG00000176386.8_CDC26	CDC26	-0.401026	3.03636	-5.20724	4.8916e-07	9.22375e-06	Significantly downregulated (Adj-P<0.01)
ENSG00000173578.7_XCR1	XCR1	1.75325	-1.52135	5.3536	2.43453e-07	5.16062e-06	Significantly upregulated (Adj-P<0.01)
ENSG00000129625.12_REEP5	REEP5	-0.348346	6.4586	-5.22473	4.50328e-07	8.58273e-06	Significantly downregulated (Adj-P<0.01)
ENSG00000214160.9_ALG3	ALG3	-0.331728	3.02274	-5.20388	4.9698e-07	9.34899e-06	Significantly downregulated (Adj-P<0.01)
ENSG00000285844.1_FO393414.3	FO393414.3	1.15903	1.21939	5.17087	5.80545e-07	1.06805e-05	Significantly upregulated (Adj-P<0.01)
ENSG00000133731.9_IMPA1	IMPA1	-0.461183	3.34287	-5.2068	4.90156e-07	9.23156e-06	Significantly downregulated (Adj-P<0.01)
ENSG00000225032.5_AL162586.1	AL162586.1	-0.511452	1.55622	-5.1735	5.73424e-07	1.0574e-05	Significantly downregulated (Adj-P<0.01)
ENSG00000165264.10_NDUFB6	NDUFB6	-0.34539	5.30109	-5.22158	4.57088e-07	8.68085e-06	Significantly downregulated (Adj-P<0.01)
ENSG00000107164.15_FUBP3	FUBP3	0.25689	4.1221	5.2111	4.80322e-07	9.06787e-06	Significantly upregulated (Adj-P<0.01)
ENSG00000066933.15_MYO9A	MYO9A	0.412612	4.68718	5.21175	4.7885e-07	9.05084e-06	Significantly upregulated (Adj-P<0.01)
ENSG00000182670.13_TTC3	TTC3	0.34419	6.58682	5.21324	4.75482e-07	9.00863e-06	Significantly upregulated (Adj-P<0.01)
ENSG00000272168.6_CASC15	CASC15	1.07236	-0.307964	5.1932	5.22656e-07	9.78562e-06	Significantly upregulated (Adj-P<0.01)
ENSG00000188897.9_AC099489.1	AC099489.1	1.40923	0.83918	5.15883	6.14307e-07	1.11213e-05	Significantly upregulated (Adj-P<0.01)
ENSG00000196155.12_PLEKHG4	PLEKHG4	0.746442	0.633697	5.15352	6.29805e-07	1.13398e-05	Significantly upregulated (Adj-P<0.01)
ENSG00000170296.9_GABARAP	GABARAP	-0.259065	6.9901	-5.20289	4.99309e-07	9.38168e-06	Significantly downregulated (Adj-P<0.01)
ENSG00000155903.11_RASA2	RASA2	0.537898	2.63544	5.16715	5.90792e-07	1.08189e-05	Significantly upregulated (Adj-P<0.01)
ENSG00000102349.17_KLF8	KLF8	0.605373	2.67698	5.17156	5.78685e-07	1.06587e-05	Significantly upregulated (Adj-P<0.01)
ENSG00000149090.11_PAMR1	PAMR1	1.3112	0.539796	5.15944	6.12567e-07	1.11024e-05	Significantly upregulated (Adj-P<0.01)
ENSG00000170365.9_SMAD1	SMAD1	0.436245	2.97484	5.17791	5.6166e-07	1.04243e-05	Significantly upregulated (Adj-P<0.01)
ENSG00000127125.8_PPCS	PPCS	-0.302564	3.79934	-5.19713	5.1304e-07	9.61692e-06	Significantly downregulated (Adj-P<0.01)
ENSG00000198804.2_MT-CO1	MT-CO1	-0.633952	15.1763	-5.15347	6.2995e-07	1.13398e-05	Significantly downregulated (Adj-P<0.01)
ENSG00000125247.15_TMTC4	TMTC4	-0.49016	3.31031	-5.18382	5.46259e-07	1.01795e-05	Significantly downregulated (Adj-P<0.01)
ENSG00000085382.11_HACE1	HACE1	0.441713	2.47122	5.15983	6.1144e-07	1.11024e-05	Significantly upregulated (Adj-P<0.01)
ENSG00000057019.15_DCBLD2	DCBLD2	0.40886	3.43041	5.17726	5.63381e-07	1.04373e-05	Significantly upregulated (Adj-P<0.01)
ENSG00000251562.8_MALAT1	MALAT1	-1.07113	11.0006	-5.16983	5.83403e-07	1.07134e-05	Significantly downregulated (Adj-P<0.01)
ENSG00000156515.23_HK1	HK1	-0.350286	6.99792	-5.19194	5.25755e-07	9.83205e-06	Significantly downregulated (Adj-P<0.01)
ENSG00000167220.11_HDHD2	HDHD2	-0.276835	3.90626	-5.18615	5.40303e-07	1.00804e-05	Significantly downregulated (Adj-P<0.01)
ENSG00000196208.13_GREB1	GREB1	-0.691121	2.41416	-5.16216	6.04793e-07	1.10371e-05	Significantly downregulated (Adj-P<0.01)
ENSG00000120093.11_HOXB3	HOXB3	-0.548628	2.47863	-5.16355	6.00866e-07	1.09907e-05	Significantly downregulated (Adj-P<0.01)
ENSG00000148541.12_FAM13C	FAM13C	0.730001	4.28681	5.18063	5.54513e-07	1.03184e-05	Significantly upregulated (Adj-P<0.01)
ENSG00000008086.11_CDKL5	CDKL5	0.559948	1.87067	5.13628	6.82764e-07	1.21391e-05	Significantly upregulated (Adj-P<0.01)
ENSG00000254154.8_CRYZL2P-SEC16B	CRYZL2P-SEC16B	0.707333	3.17693	5.16052	6.09456e-07	1.11024e-05	Significantly upregulated (Adj-P<0.01)
ENSG00000148158.16_SNX30	SNX30	0.555476	2.18636	5.1381	6.76964e-07	1.20495e-05	Significantly upregulated (Adj-P<0.01)
ENSG00000278974.1_AC093909.6	AC093909.6	-0.837848	0.714212	-5.13025	7.02268e-07	1.23888e-05	Significantly downregulated (Adj-P<0.01)
ENSG00000215271.7_HOMEZ	HOMEZ	-0.356119	2.41628	-5.1509	6.37591e-07	1.14514e-05	Significantly downregulated (Adj-P<0.01)
ENSG00000125878.6_TCF15	TCF15	-0.664156	2.28553	-5.15547	6.24085e-07	1.12854e-05	Significantly downregulated (Adj-P<0.01)
ENSG00000000419.12_DPM1	DPM1	-0.304948	4.2866	-5.18044	5.5501e-07	1.03184e-05	Significantly downregulated (Adj-P<0.01)
ENSG00000175414.6_ARL10	ARL10	0.415163	4.5391	5.17777	5.62019e-07	1.04243e-05	Significantly upregulated (Adj-P<0.01)
ENSG00000135624.15_CCT7	CCT7	-0.227734	7.01499	-5.17518	5.68925e-07	1.05155e-05	Significantly downregulated (Adj-P<0.01)
ENSG00000198840.2_MT-ND3	MT-ND3	-0.807139	11.7881	-5.13977	6.71699e-07	1.19827e-05	Significantly downregulated (Adj-P<0.01)
ENSG00000158301.18_GPRASP2	GPRASP2	-0.417515	2.97711	-5.15022	6.39635e-07	1.14751e-05	Significantly downregulated (Adj-P<0.01)
ENSG00000136436.14_CALCOCO2	CALCOCO2	-0.237783	6.4795	-5.1749	5.69659e-07	1.05168e-05	Significantly downregulated (Adj-P<0.01)
ENSG00000089101.17_CFAP61	CFAP61	1.44278	3.26814	5.12822	7.08986e-07	1.2452e-05	Significantly upregulated (Adj-P<0.01)
ENSG00000173175.14_ADCY5	ADCY5	-0.62341	2.06378	-5.13268	6.94348e-07	1.22764e-05	Significantly downregulated (Adj-P<0.01)
ENSG00000273156.1_AC124016.2	AC124016.2	-1.08906	-0.154264	-5.13384	6.90606e-07	1.22238e-05	Significantly downregulated (Adj-P<0.01)
ENSG00000165813.19_CCDC186	CCDC186	0.470804	4.20407	5.16018	6.10431e-07	1.11024e-05	Significantly upregulated (Adj-P<0.01)
ENSG00000111727.11_HCFC2	HCFC2	0.414876	4.21968	5.16329	6.01589e-07	1.09913e-05	Significantly upregulated (Adj-P<0.01)
ENSG00000167985.6_SDHAF2	SDHAF2	-0.332743	3.26735	-5.15481	6.2602e-07	1.13075e-05	Significantly downregulated (Adj-P<0.01)
ENSG00000179630.10_LACC1	LACC1	1.06679	0.174483	5.1355	6.85248e-07	1.21561e-05	Significantly upregulated (Adj-P<0.01)
ENSG00000130559.18_CAMSAP1	CAMSAP1	0.292495	6.09111	5.16973	5.8368e-07	1.07134e-05	Significantly upregulated (Adj-P<0.01)
ENSG00000055332.17_EIF2AK2	EIF2AK2	0.423622	4.19366	5.15404	6.28261e-07	1.13351e-05	Significantly upregulated (Adj-P<0.01)
ENSG00000198695.2_MT-ND6	MT-ND6	-0.653998	10.798	-5.13067	7.00889e-07	1.23782e-05	Significantly downregulated (Adj-P<0.01)
ENSG00000119421.6_NDUFA8	NDUFA8	-0.434034	6.17021	-5.15962	6.12056e-07	1.11024e-05	Significantly downregulated (Adj-P<0.01)
ENSG00000080845.17_DLGAP4	DLGAP4	-0.30554	6.01939	-5.15993	6.11168e-07	1.11024e-05	Significantly downregulated (Adj-P<0.01)
ENSG00000145864.12_GABRB2	GABRB2	2.22982	-1.69337	5.54678	9.50034e-08	2.40383e-06	Significantly upregulated (Adj-P<0.01)
ENSG00000065427.14_KARS	KARS	-0.223852	6.79088	-5.1518	6.34916e-07	1.14163e-05	Significantly downregulated (Adj-P<0.01)
ENSG00000285336.1_AC108734.4	AC108734.4	1.01146	2.32299	5.10407	7.9351e-07	1.35614e-05	Significantly upregulated (Adj-P<0.01)
ENSG00000204954.9_C12orf73	C12orf73	-0.367821	3.3345	-5.14063	6.69008e-07	1.19481e-05	Significantly downregulated (Adj-P<0.01)
ENSG00000196371.3_FUT4	FUT4	0.533372	0.791731	5.09784	8.16875e-07	1.3886e-05	Significantly upregulated (Adj-P<0.01)
ENSG00000138867.16_GUCD1	GUCD1	-0.339446	6.78338	-5.14445	6.57164e-07	1.17763e-05	Significantly downregulated (Adj-P<0.01)
ENSG00000144857.14_BOC	BOC	0.620003	2.62771	5.11208	7.64455e-07	1.31927e-05	Significantly upregulated (Adj-P<0.01)
ENSG00000143171.12_RXRG	RXRG	-0.545668	4.33489	-5.14329	6.60726e-07	1.18268e-05	Significantly downregulated (Adj-P<0.01)
ENSG00000178498.15_DTX3	DTX3	-0.419359	2.70174	-5.11969	7.37775e-07	1.28298e-05	Significantly downregulated (Adj-P<0.01)
ENSG00000153317.14_ASAP1	ASAP1	0.443706	3.44479	5.12204	7.29742e-07	1.2746e-05	Significantly upregulated (Adj-P<0.01)
ENSG00000111371.15_SLC38A1	SLC38A1	-1.45373	3.47284	-5.12931	7.0536e-07	1.24084e-05	Significantly downregulated (Adj-P<0.01)
ENSG00000187118.13_CMC1	CMC1	-0.357827	3.41458	-5.1294	7.05075e-07	1.24084e-05	Significantly downregulated (Adj-P<0.01)
ENSG00000281344.1_HELLPAR	HELLPAR	1.58592	0.308607	5.13574	6.845e-07	1.21561e-05	Significantly upregulated (Adj-P<0.01)
ENSG00000258461.5_AC012651.1	AC012651.1	0.528222	6.56983	5.13909	6.73856e-07	1.20076e-05	Significantly upregulated (Adj-P<0.01)
ENSG00000242114.5_MTFP1	MTFP1	-0.913148	2.03377	-5.10411	7.93343e-07	1.35614e-05	Significantly downregulated (Adj-P<0.01)
ENSG00000174547.13_MRPL11	MRPL11	-0.333224	4.72954	-5.14088	6.68208e-07	1.19472e-05	Significantly downregulated (Adj-P<0.01)
ENSG00000064300.8_NGFR	NGFR	1.85628	-0.713105	5.11914	7.39669e-07	1.28487e-05	Significantly upregulated (Adj-P<0.01)
ENSG00000076513.16_ANKRD13A	ANKRD13A	0.313705	3.69446	5.12441	7.2171e-07	1.26196e-05	Significantly upregulated (Adj-P<0.01)
ENSG00000179981.10_TSHZ1	TSHZ1	0.504514	3.7178	5.11824	7.42779e-07	1.28886e-05	Significantly upregulated (Adj-P<0.01)
ENSG00000047365.11_ARAP2	ARAP2	1.09953	-0.430524	5.12703	7.1294e-07	1.24956e-05	Significantly upregulated (Adj-P<0.01)
ENSG00000033050.8_ABCF2	ABCF2	-0.293948	5.1073	-5.13414	6.89636e-07	1.22203e-05	Significantly downregulated (Adj-P<0.01)
ENSG00000069020.18_MAST4	MAST4	0.650772	3.52974	5.10929	7.74454e-07	1.33218e-05	Significantly upregulated (Adj-P<0.01)
ENSG00000136280.16_CCM2	CCM2	-0.348022	4.45557	-5.1292	7.05726e-07	1.24084e-05	Significantly downregulated (Adj-P<0.01)
ENSG00000185946.15_RNPC3	RNPC3	0.532497	4.83322	5.12138	7.31986e-07	1.27571e-05	Significantly upregulated (Adj-P<0.01)
ENSG00000204310.12_AGPAT1	AGPAT1	-0.263288	5.34644	-5.12699	7.13047e-07	1.24956e-05	Significantly downregulated (Adj-P<0.01)
ENSG00000104879.4_CKM	CKM	-0.462188	14.5033	-5.07378	9.13426e-07	1.51858e-05	Significantly downregulated (Adj-P<0.01)
ENSG00000227877.6_MRLN	MRLN	-0.600417	3.92365	-5.11989	7.37084e-07	1.28298e-05	Significantly downregulated (Adj-P<0.01)
ENSG00000112320.11_SOBP	SOBP	-0.383682	4.58588	-5.12173	7.30777e-07	1.275e-05	Significantly downregulated (Adj-P<0.01)
ENSG00000279400.1_AC008957.3	AC008957.3	1.4817	-0.1795	5.12446	7.21543e-07	1.26196e-05	Significantly upregulated (Adj-P<0.01)
ENSG00000246596.7_AC139795.1	AC139795.1	1.15349	0.195196	5.0796	8.89096e-07	1.48591e-05	Significantly upregulated (Adj-P<0.01)
ENSG00000170558.8_CDH2	CDH2	2.1179	-1.72005	5.40521	1.89756e-07	4.26736e-06	Significantly upregulated (Adj-P<0.01)
ENSG00000243429.1_OR7E29P	OR7E29P	-1.66746	-0.191965	-5.06125	9.68064e-07	1.58782e-05	Significantly downregulated (Adj-P<0.01)
ENSG00000163170.11_BOLA3	BOLA3	-0.451743	4.04834	-5.11248	7.63023e-07	1.31823e-05	Significantly downregulated (Adj-P<0.01)
ENSG00000149084.12_HSD17B12	HSD17B12	-0.513053	4.12033	-5.10875	7.76383e-07	1.33261e-05	Significantly downregulated (Adj-P<0.01)
ENSG00000164190.17_NIPBL	NIPBL	0.347827	4.6552	5.1095	7.73673e-07	1.33218e-05	Significantly upregulated (Adj-P<0.01)
ENSG00000078674.17_PCM1	PCM1	0.3788	7.62444	5.10891	7.7583e-07	1.33261e-05	Significantly upregulated (Adj-P<0.01)
ENSG00000067064.11_IDI1	IDI1	-0.415275	6.0397	-5.11407	7.57392e-07	1.31135e-05	Significantly downregulated (Adj-P<0.01)
ENSG00000091656.16_ZFHX4	ZFHX4	0.515749	3.94023	5.09577	8.24752e-07	1.3975e-05	Significantly upregulated (Adj-P<0.01)
ENSG00000121073.14_SLC35B1	SLC35B1	-0.280739	4.80988	-5.11352	7.59333e-07	1.31328e-05	Significantly downregulated (Adj-P<0.01)
ENSG00000232388.4_SMIM26	SMIM26	-0.339589	5.16371	-5.1145	7.55857e-07	1.31013e-05	Significantly downregulated (Adj-P<0.01)
ENSG00000186814.13_ZSCAN30	ZSCAN30	0.326453	4.32123	5.10597	7.86514e-07	1.34708e-05	Significantly upregulated (Adj-P<0.01)
ENSG00000166881.9_NEMP1	NEMP1	0.497072	2.09377	5.0604	9.71862e-07	1.5906e-05	Significantly upregulated (Adj-P<0.01)
ENSG00000109111.14_SUPT6H	SUPT6H	-0.232648	6.14197	-5.11063	7.69641e-07	1.32677e-05	Significantly downregulated (Adj-P<0.01)
ENSG00000156170.12_NDUFAF6	NDUFAF6	-0.323669	3.79856	-5.10251	7.9929e-07	1.3637e-05	Significantly downregulated (Adj-P<0.01)
ENSG00000148773.13_MKI67	MKI67	2.23868	-2.4263	5.23005	4.39142e-07	8.43078e-06	Significantly upregulated (Adj-P<0.01)
ENSG00000119487.16_MAPKAP1	MAPKAP1	-0.271152	5.97305	-5.1081	7.78752e-07	1.33523e-05	Significantly downregulated (Adj-P<0.01)
ENSG00000006625.17_GGCT	GGCT	-0.367082	3.65383	-5.09653	8.21831e-07	1.39553e-05	Significantly downregulated (Adj-P<0.01)
ENSG00000100321.14_SYNGR1	SYNGR1	-0.351534	4.10596	-5.10173	8.02189e-07	1.36656e-05	Significantly downregulated (Adj-P<0.01)
ENSG00000110717.12_NDUFS8	NDUFS8	-0.409001	6.47682	-5.09947	8.10669e-07	1.37953e-05	Significantly downregulated (Adj-P<0.01)
ENSG00000280433.1_FP565260.6	FP565260.6	-0.533374	2.38643	-5.06304	9.60047e-07	1.58045e-05	Significantly downregulated (Adj-P<0.01)
ENSG00000123358.19_NR4A1	NR4A1	-1.0211	5.47568	-5.10241	7.99653e-07	1.3637e-05	Significantly downregulated (Adj-P<0.01)
ENSG00000182162.10_P2RY8	P2RY8	-0.857534	-0.696622	-5.06292	9.60593e-07	1.58045e-05	Significantly downregulated (Adj-P<0.01)
ENSG00000182162.10_PAR_Y_P2RY8	PAR	-0.857534	-0.696622	-5.06292	9.60593e-07	1.58045e-05	Significantly downregulated (Adj-P<0.01)
ENSG00000139433.9_GLTP	GLTP	-0.309464	3.24816	-5.08003	8.87324e-07	1.48451e-05	Significantly downregulated (Adj-P<0.01)
ENSG00000181227.3_DLSTP1	DLSTP1	0.959809	-0.423164	5.096	8.23896e-07	1.3975e-05	Significantly upregulated (Adj-P<0.01)
ENSG00000141338.13_ABCA8	ABCA8	0.587701	4.64268	5.0955	8.25806e-07	1.3978e-05	Significantly upregulated (Adj-P<0.01)
ENSG00000078403.16_MLLT10	MLLT10	0.377101	4.25183	5.091	8.43241e-07	1.42276e-05	Significantly upregulated (Adj-P<0.01)
ENSG00000118007.12_STAG1	STAG1	0.431016	4.87996	5.09442	8.29971e-07	1.40335e-05	Significantly upregulated (Adj-P<0.01)
ENSG00000267322.2_SNHG22	SNHG22	-0.930306	1.82666	-5.05325	1.00455e-06	1.63414e-05	Significantly downregulated (Adj-P<0.01)
ENSG00000280987.4_MATR3	MATR3	0.596828	5.20353	5.09276	8.36391e-07	1.4127e-05	Significantly upregulated (Adj-P<0.01)
ENSG00000138131.3_LOXL4	LOXL4	1.06082	2.28777	5.03903	1.07274e-06	1.73441e-05	Significantly upregulated (Adj-P<0.01)
ENSG00000130203.9_APOE	APOE	0.879764	4.08711	5.08816	8.54452e-07	1.44014e-05	Significantly upregulated (Adj-P<0.01)
ENSG00000082258.12_CCNT2	CCNT2	0.367823	4.57299	5.08502	8.67031e-07	1.4567e-05	Significantly upregulated (Adj-P<0.01)
ENSG00000117394.21_SLC2A1	SLC2A1	1.83321	-0.657534	5.08454	8.6896e-07	1.4584e-05	Significantly upregulated (Adj-P<0.01)
ENSG00000102531.16_FNDC3A	FNDC3A	0.403598	4.56496	5.08208	8.78931e-07	1.47202e-05	Significantly upregulated (Adj-P<0.01)
ENSG00000040341.17_STAU2	STAU2	-0.316445	6.17112	-5.08613	8.6255e-07	1.45071e-05	Significantly downregulated (Adj-P<0.01)
ENSG00000105341.18_DMAC2	DMAC2	-0.297263	5.03218	-5.08687	8.59605e-07	1.44729e-05	Significantly downregulated (Adj-P<0.01)
ENSG00000113621.14_TXNDC15	TXNDC15	-0.232637	4.71874	-5.08307	8.749e-07	1.46682e-05	Significantly downregulated (Adj-P<0.01)
ENSG00000151422.12_FER	FER	0.494132	1.86288	5.02809	1.12829e-06	1.80947e-05	Significantly upregulated (Adj-P<0.01)
ENSG00000188176.11_SMTNL2	SMTNL2	-0.540424	7.04898	-5.07556	9.05934e-07	1.51087e-05	Significantly downregulated (Adj-P<0.01)
ENSG00000122026.10_RPL21	RPL21	-0.33088	8.18314	-5.06726	9.4145e-07	1.55702e-05	Significantly downregulated (Adj-P<0.01)
ENSG00000100220.11_RTCB	RTCB	-0.207707	4.97945	-5.07895	8.91797e-07	1.48886e-05	Significantly downregulated (Adj-P<0.01)
ENSG00000129317.14_PUS7L	PUS7L	0.49305	2.7052	5.03533	1.09121e-06	1.76247e-05	Significantly upregulated (Adj-P<0.01)
ENSG00000101166.15_PRELID3B	PRELID3B	-0.302901	3.64487	-5.06138	9.67461e-07	1.58782e-05	Significantly downregulated (Adj-P<0.01)
ENSG00000135862.5_LAMC1	LAMC1	0.397702	6.29093	5.07505	9.08097e-07	1.51253e-05	Significantly upregulated (Adj-P<0.01)
ENSG00000132768.13_DPH2	DPH2	-0.471018	4.13589	-5.07134	9.23853e-07	1.53271e-05	Significantly downregulated (Adj-P<0.01)
ENSG00000188807.12_TMEM201	TMEM201	-0.342196	5.16432	-5.07487	9.08832e-07	1.51253e-05	Significantly downregulated (Adj-P<0.01)
ENSG00000092201.9_SUPT16H	SUPT16H	0.228641	4.86104	5.07166	9.22452e-07	1.53198e-05	Significantly upregulated (Adj-P<0.01)
ENSG00000087085.14_ACHE	ACHE	-0.616976	6.67844	-5.06783	9.38995e-07	1.55458e-05	Significantly downregulated (Adj-P<0.01)
ENSG00000155561.14_NUP205	NUP205	0.319515	4.06799	5.0602	9.72776e-07	1.5906e-05	Significantly upregulated (Adj-P<0.01)
ENSG00000188070.9_C11orf95	C11orf95	0.38641	3.94015	5.05973	9.7488e-07	1.5924e-05	Significantly upregulated (Adj-P<0.01)
ENSG00000226137.5_BAIAP2-DT	BAIAP2-DT	0.705512	0.443158	5.00809	1.23704e-06	1.95818e-05	Significantly upregulated (Adj-P<0.01)
ENSG00000196655.11_TRAPPC4	TRAPPC4	-0.266077	3.77305	-5.05708	9.86909e-07	1.60874e-05	Significantly downregulated (Adj-P<0.01)
ENSG00000163220.10_S100A9	S100A9	-2.22392	0.0332325	-5.00965	1.2282e-06	1.94612e-05	Significantly downregulated (Adj-P<0.01)
ENSG00000140740.10_UQCRC2	UQCRC2	-0.317186	8.61839	-5.04954	1.02193e-06	1.65901e-05	Significantly downregulated (Adj-P<0.01)
ENSG00000119681.11_LTBP2	LTBP2	0.702401	4.72324	5.06124	9.68072e-07	1.58782e-05	Significantly upregulated (Adj-P<0.01)
ENSG00000137996.12_RTCA	RTCA	-0.261769	4.65988	-5.06399	9.55862e-07	1.57921e-05	Significantly downregulated (Adj-P<0.01)
ENSG00000004779.9_NDUFAB1	NDUFAB1	-0.396926	6.7251	-5.05636	9.90192e-07	1.61244e-05	Significantly downregulated (Adj-P<0.01)
ENSG00000272831.1_AC027644.3	AC027644.3	-0.822344	-0.609936	-5.01938	1.17444e-06	1.87026e-05	Significantly downregulated (Adj-P<0.01)
ENSG00000214194.8_SMIM30	SMIM30	-0.319847	5.46018	-5.06068	9.70603e-07	1.59033e-05	Significantly downregulated (Adj-P<0.01)
ENSG00000130821.15_SLC6A8	SLC6A8	-0.385777	6.97597	-5.05228	1.00906e-06	1.6398e-05	Significantly downregulated (Adj-P<0.01)
ENSG00000160783.19_PMF1	PMF1	-0.30676	5.41135	-5.05809	9.82306e-07	1.60288e-05	Significantly downregulated (Adj-P<0.01)
ENSG00000165806.19_CASP7	CASP7	0.431153	3.06959	5.02786	1.12944e-06	1.80949e-05	Significantly upregulated (Adj-P<0.01)
ENSG00000153574.8_RPIA	RPIA	-0.265609	3.99978	-5.04705	1.03376e-06	1.6748e-05	Significantly downregulated (Adj-P<0.01)
ENSG00000002016.17_RAD52	RAD52	0.514885	3.61865	5.03451	1.09536e-06	1.76739e-05	Significantly upregulated (Adj-P<0.01)
ENSG00000157227.12_MMP14	MMP14	0.769497	2.89931	5.02979	1.11947e-06	1.79897e-05	Significantly upregulated (Adj-P<0.01)
ENSG00000065609.14_SNAP91	SNAP91	2.96553	-2.39696	5.62102	6.57823e-08	1.81324e-06	Significantly upregulated (Adj-P<0.01)
ENSG00000100567.12_PSMA3	PSMA3	-0.249796	5.34158	-5.04832	1.02771e-06	1.66669e-05	Significantly downregulated (Adj-P<0.01)
ENSG00000111875.7_ASF1A	ASF1A	-0.360064	3.80248	-5.03386	1.09866e-06	1.7709e-05	Significantly downregulated (Adj-P<0.01)
ENSG00000175155.8_YPEL2	YPEL2	0.413071	5.46408	5.04291	1.05369e-06	1.70534e-05	Significantly upregulated (Adj-P<0.01)
ENSG00000278318.4_ZNF229	ZNF229	0.718566	0.870058	4.97932	1.41148e-06	2.16104e-05	Significantly upregulated (Adj-P<0.01)
ENSG00000172175.13_MALT1	MALT1	0.454874	4.43698	5.02949	1.121e-06	1.79961e-05	Significantly upregulated (Adj-P<0.01)
ENSG00000167088.10_SNRPD1	SNRPD1	-0.2954	3.99537	-5.02717	1.13308e-06	1.81349e-05	Significantly downregulated (Adj-P<0.01)
ENSG00000184349.12_EFNA5	EFNA5	1.9748	-1.48715	5.23593	4.27074e-07	8.23894e-06	Significantly upregulated (Adj-P<0.01)
ENSG00000269930.1_AC091057.3	AC091057.3	-1.15776	0.140766	-4.97467	1.44181e-06	2.19479e-05	Significantly downregulated (Adj-P<0.01)
ENSG00000138434.16_ITPRID2	ITPRID2	0.333133	6.18098	5.03278	1.10413e-06	1.77792e-05	Significantly upregulated (Adj-P<0.01)
ENSG00000064995.17_TAF11	TAF11	-0.249395	3.71517	-5.02141	1.16351e-06	1.85845e-05	Significantly downregulated (Adj-P<0.01)
ENSG00000081386.12_ZNF510	ZNF510	0.434808	2.93268	4.996	1.30761e-06	2.03829e-05	Significantly upregulated (Adj-P<0.01)
ENSG00000132463.13_GRSF1	GRSF1	-0.356003	7.56347	-5.02306	1.15472e-06	1.84628e-05	Significantly downregulated (Adj-P<0.01)
ENSG00000203799.12_CCDC162P	CCDC162P	0.854882	0.227143	4.9786	1.41613e-06	2.164e-05	Significantly upregulated (Adj-P<0.01)
ENSG00000103064.14_SLC7A6	SLC7A6	0.59449	5.6254	5.03096	1.11342e-06	1.79106e-05	Significantly upregulated (Adj-P<0.01)
ENSG00000057663.15_ATG5	ATG5	-0.292961	3.86912	-5.01999	1.17117e-06	1.8688e-05	Significantly downregulated (Adj-P<0.01)
ENSG00000175455.14_CCDC14	CCDC14	0.433565	3.31049	5.00248	1.26934e-06	1.99716e-05	Significantly upregulated (Adj-P<0.01)
ENSG00000226328.6_NUP50-DT	NUP50-DT	-0.509274	1.58362	-4.97614	1.4322e-06	2.18434e-05	Significantly downregulated (Adj-P<0.01)
ENSG00000175489.9_LRRC25	LRRC25	-0.906128	1.51192	-4.97507	1.43923e-06	2.19296e-05	Significantly downregulated (Adj-P<0.01)
ENSG00000198722.14_UNC13B	UNC13B	0.53835	6.4154	5.01949	1.17383e-06	1.87026e-05	Significantly upregulated (Adj-P<0.01)
ENSG00000254838.5_GVINP1	GVINP1	1.21663	-0.0750727	4.99903	1.28957e-06	2.01719e-05	Significantly upregulated (Adj-P<0.01)
ENSG00000146701.11_MDH2	MDH2	-0.32951	8.55536	-5.00211	1.2715e-06	1.99716e-05	Significantly downregulated (Adj-P<0.01)
ENSG00000172869.14_DMXL1	DMXL1	0.46758	3.81296	5.00132	1.27608e-06	2.002e-05	Significantly upregulated (Adj-P<0.01)
ENSG00000100399.15_CHADL	CHADL	0.633614	0.45237	4.95421	1.58306e-06	2.36002e-05	Significantly upregulated (Adj-P<0.01)
ENSG00000047662.4_FAM184B	FAM184B	2.01429	2.56118	4.95742	1.56006e-06	2.33231e-05	Significantly upregulated (Adj-P<0.01)
ENSG00000167283.7_ATP5MG	ATP5MG	-0.448842	6.83948	-5.01124	1.21922e-06	1.93382e-05	Significantly downregulated (Adj-P<0.01)
ENSG00000138107.12_ACTR1A	ACTR1A	-0.267342	6.48934	-5.01266	1.2113e-06	1.92318e-05	Significantly downregulated (Adj-P<0.01)
ENSG00000279232.2_AC008522.1	AC008522.1	3.26808	1.77788	4.97067	1.46846e-06	2.22681e-05	Significantly upregulated (Adj-P<0.01)
ENSG00000080345.17_RIF1	RIF1	0.417332	5.61771	5.01442	1.20157e-06	1.91155e-05	Significantly upregulated (Adj-P<0.01)
ENSG00000111669.14_TPI1	TPI1	-0.496891	9.29184	-4.98742	1.36011e-06	2.10063e-05	Significantly downregulated (Adj-P<0.01)
ENSG00000159433.11_STARD9	STARD9	0.535131	3.83748	5.00207	1.27173e-06	1.99716e-05	Significantly upregulated (Adj-P<0.01)
ENSG00000091129.19_NRCAM	NRCAM	2.49998	-2.23303	5.40107	1.93595e-07	4.29288e-06	Significantly upregulated (Adj-P<0.01)
ENSG00000237522.1_NONOP2	NONOP2	1.33919	-1.40071	5.17621	5.66165e-07	1.04767e-05	Significantly upregulated (Adj-P<0.01)
ENSG00000247627.2_MTND4P12	MTND4P12	-0.900869	-0.94202	-4.98525	1.37366e-06	2.11949e-05	Significantly downregulated (Adj-P<0.01)
ENSG00000170734.11_POLH	POLH	0.329775	2.72412	4.96946	1.47662e-06	2.23492e-05	Significantly upregulated (Adj-P<0.01)
ENSG00000137692.11_DCUN1D5	DCUN1D5	-0.35598	3.69496	-4.99929	1.28807e-06	2.01719e-05	Significantly downregulated (Adj-P<0.01)
ENSG00000068724.15_TTC7A	TTC7A	0.577832	2.16707	4.96161	1.5305e-06	2.29894e-05	Significantly upregulated (Adj-P<0.01)
ENSG00000018408.14_WWTR1	WWTR1	0.517054	3.79985	4.99072	1.33965e-06	2.07105e-05	Significantly upregulated (Adj-P<0.01)
ENSG00000156502.13_SUPV3L1	SUPV3L1	-0.270455	4.56515	-5.00404	1.26028e-06	1.991e-05	Significantly downregulated (Adj-P<0.01)
ENSG00000188677.14_PARVB	PARVB	-0.333996	7.04042	-4.99921	1.2885e-06	2.01719e-05	Significantly downregulated (Adj-P<0.01)
ENSG00000123636.17_BAZ2B	BAZ2B	0.462224	4.47405	4.99518	1.31255e-06	2.03908e-05	Significantly upregulated (Adj-P<0.01)
ENSG00000164919.10_COX6C	COX6C	-0.456652	7.18233	-4.99551	1.3106e-06	2.03908e-05	Significantly downregulated (Adj-P<0.01)
ENSG00000138085.16_ATRAID	ATRAID	-0.272104	5.37098	-5.00333	1.26437e-06	1.99348e-05	Significantly downregulated (Adj-P<0.01)
ENSG00000106635.7_BCL7B	BCL7B	-0.264826	5.04664	-5.00338	1.26408e-06	1.99348e-05	Significantly downregulated (Adj-P<0.01)
ENSG00000270504.1_AL391422.4	AL391422.4	1.14492	-0.782225	4.9947	1.31547e-06	2.04161e-05	Significantly upregulated (Adj-P<0.01)
ENSG00000281852.1_LINC00891	LINC00891	1.20841	-1.08445	5.06881	9.3474e-07	1.54915e-05	Significantly upregulated (Adj-P<0.01)
ENSG00000166889.13_PATL1	PATL1	-0.308813	5.27115	-5.00252	1.26909e-06	1.99716e-05	Significantly downregulated (Adj-P<0.01)
ENSG00000112983.17_BRD8	BRD8	0.32246	4.65795	4.99591	1.30819e-06	2.03829e-05	Significantly upregulated (Adj-P<0.01)
ENSG00000122390.18_NAA60	NAA60	-0.458483	4.74269	-4.99854	1.29246e-06	2.01972e-05	Significantly downregulated (Adj-P<0.01)
ENSG00000135048.13_CEMIP2	CEMIP2	0.474734	3.18666	4.9654	1.50423e-06	2.26591e-05	Significantly upregulated (Adj-P<0.01)
ENSG00000034152.18_MAP2K3	MAP2K3	-0.449235	6.1247	-4.99539	1.31132e-06	2.03908e-05	Significantly downregulated (Adj-P<0.01)
ENSG00000156253.6_RWDD2B	RWDD2B	-0.299823	4.87663	-4.99683	1.30265e-06	2.03365e-05	Significantly downregulated (Adj-P<0.01)
ENSG00000165646.13_SLC18A2	SLC18A2	-2.39187	-1.84794	-4.97867	1.41572e-06	2.164e-05	Significantly downregulated (Adj-P<0.01)
ENSG00000196569.12_LAMA2	LAMA2	0.535603	4.93215	4.99368	1.32164e-06	2.04719e-05	Significantly upregulated (Adj-P<0.01)
ENSG00000188517.15_COL25A1	COL25A1	2.28181	-1.81886	5.16937	5.84652e-07	1.07189e-05	Significantly upregulated (Adj-P<0.01)
ENSG00000151092.16_NGLY1	NGLY1	-0.297197	5.20288	-4.99415	1.31875e-06	2.0447e-05	Significantly downregulated (Adj-P<0.01)
ENSG00000114850.6_SSR3	SSR3	-0.290117	5.89993	-4.99311	1.32508e-06	2.05052e-05	Significantly downregulated (Adj-P<0.01)
ENSG00000188993.3_LRRC66	LRRC66	0.685191	2.8384	4.95097	1.60661e-06	2.39065e-05	Significantly upregulated (Adj-P<0.01)
ENSG00000163964.14_PIGX	PIGX	-0.335937	3.7101	-4.98007	1.40663e-06	2.15778e-05	Significantly downregulated (Adj-P<0.01)
ENSG00000187634.11_SAMD11	SAMD11	1.63725	-1.83806	5.00737	1.24112e-06	1.96267e-05	Significantly upregulated (Adj-P<0.01)
ENSG00000263001.5_GTF2I	GTF2I	0.298285	6.91419	4.98475	1.37682e-06	2.1223e-05	Significantly upregulated (Adj-P<0.01)
ENSG00000097096.8_SYDE2	SYDE2	0.933586	0.335966	4.93971	1.69117e-06	2.49079e-05	Significantly upregulated (Adj-P<0.01)
ENSG00000197323.11_TRIM33	TRIM33	0.381084	4.47446	4.97726	1.42487e-06	2.17526e-05	Significantly upregulated (Adj-P<0.01)
ENSG00000188994.12_ZNF292	ZNF292	0.443604	4.03915	4.96804	1.4862e-06	2.24728e-05	Significantly upregulated (Adj-P<0.01)
ENSG00000117408.10_IPO13	IPO13	-0.24424	6.9671	-4.97945	1.41064e-06	2.16104e-05	Significantly downregulated (Adj-P<0.01)
ENSG00000235205.1_TATDN2P3	TATDN2P3	1.20447	0.290515	4.98404	1.38133e-06	2.12513e-05	Significantly upregulated (Adj-P<0.01)
ENSG00000136897.7_MRPL50	MRPL50	-0.265089	3.74506	-4.96619	1.49883e-06	2.26207e-05	Significantly downregulated (Adj-P<0.01)
ENSG00000116199.11_FAM20B	FAM20B	-0.249053	5.22122	-4.98043	1.40437e-06	2.1564e-05	Significantly downregulated (Adj-P<0.01)
ENSG00000184232.8_OAF	OAF	0.79113	2.66069	4.94597	1.64362e-06	2.43431e-05	Significantly upregulated (Adj-P<0.01)
ENSG00000022567.9_SLC45A4	SLC45A4	-0.52759	2.08399	-4.92887	1.77665e-06	2.58314e-05	Significantly downregulated (Adj-P<0.01)
ENSG00000101577.9_LPIN2	LPIN2	0.659746	1.91947	4.9166	1.87839e-06	2.7011e-05	Significantly upregulated (Adj-P<0.01)
ENSG00000279159.1_AC003681.1	AC003681.1	0.580218	3.3544	4.94617	1.64213e-06	2.43431e-05	Significantly upregulated (Adj-P<0.01)
ENSG00000174456.13_C12orf76	C12orf76	0.353669	2.19092	4.92701	1.79172e-06	2.59934e-05	Significantly upregulated (Adj-P<0.01)
ENSG00000132561.13_MATN2	MATN2	0.978265	2.07194	4.92243	1.82935e-06	2.65005e-05	Significantly upregulated (Adj-P<0.01)
ENSG00000119285.10_HEATR1	HEATR1	0.460205	3.08587	4.93913	1.69565e-06	2.49507e-05	Significantly upregulated (Adj-P<0.01)
ENSG00000213619.9_NDUFS3	NDUFS3	-0.415546	6.55346	-4.96732	1.49112e-06	2.25257e-05	Significantly downregulated (Adj-P<0.01)
ENSG00000164062.12_APEH	APEH	-0.272187	6.22287	-4.96995	1.47332e-06	2.23204e-05	Significantly downregulated (Adj-P<0.01)
ENSG00000135720.12_DYNC1LI2	DYNC1LI2	0.343187	6.12192	4.97134	1.46398e-06	2.22593e-05	Significantly upregulated (Adj-P<0.01)
ENSG00000164136.16_IL15	IL15	0.59042	2.81225	4.93125	1.7575e-06	2.56941e-05	Significantly upregulated (Adj-P<0.01)
ENSG00000197565.15_COL4A6	COL4A6	0.633025	1.87989	4.91041	1.93181e-06	2.75778e-05	Significantly upregulated (Adj-P<0.01)
ENSG00000175110.11_MRPS22	MRPS22	-0.264848	4.91541	-4.97117	1.46507e-06	2.22593e-05	Significantly downregulated (Adj-P<0.01)
ENSG00000270021.1_AC026691.1	AC026691.1	1.00003	-0.93967	4.97074	1.46798e-06	2.22681e-05	Significantly upregulated (Adj-P<0.01)
ENSG00000150787.7_PTS	PTS	-0.320082	3.70275	-4.95542	1.57437e-06	2.35149e-05	Significantly downregulated (Adj-P<0.01)
ENSG00000065883.15_CDK13	CDK13	0.235027	4.67689	4.96285	1.52189e-06	2.28817e-05	Significantly upregulated (Adj-P<0.01)
ENSG00000112293.14_GPLD1	GPLD1	0.880345	1.07651	4.89848	2.03903e-06	2.89051e-05	Significantly upregulated (Adj-P<0.01)
ENSG00000081791.8_DELE1	DELE1	-0.287658	5.33497	-4.96561	1.50278e-06	2.26588e-05	Significantly downregulated (Adj-P<0.01)
ENSG00000083937.8_CHMP2B	CHMP2B	-0.336684	4.49795	-4.96054	1.53801e-06	2.30585e-05	Significantly downregulated (Adj-P<0.01)
ENSG00000117640.17_MTFR1L	MTFR1L	-0.323551	6.57019	-4.95957	1.54483e-06	2.31171e-05	Significantly downregulated (Adj-P<0.01)
ENSG00000214097.4_SMCO1	SMCO1	-0.578311	6.38469	-4.96015	1.54072e-06	2.30773e-05	Significantly downregulated (Adj-P<0.01)
ENSG00000197223.11_C1D	C1D	-0.269787	4.07286	-4.95425	1.58279e-06	2.36002e-05	Significantly downregulated (Adj-P<0.01)
ENSG00000004455.16_AK2	AK2	-0.26734	5.64081	-4.96099	1.53488e-06	2.30333e-05	Significantly downregulated (Adj-P<0.01)
ENSG00000116717.12_GADD45A	GADD45A	1.09629	3.18745	4.92984	1.76879e-06	2.58117e-05	Significantly upregulated (Adj-P<0.01)
ENSG00000008300.16_CELSR3	CELSR3	0.929844	-0.612622	4.92689	1.7927e-06	2.59934e-05	Significantly upregulated (Adj-P<0.01)
ENSG00000241644.2_INMT	INMT	-0.495581	2.88951	-4.92912	1.77458e-06	2.58249e-05	Significantly downregulated (Adj-P<0.01)
ENSG00000124172.9_ATP5F1E	ATP5F1E	-0.470846	6.24005	-4.95101	1.60636e-06	2.39065e-05	Significantly downregulated (Adj-P<0.01)
ENSG00000172053.17_QARS	QARS	-0.269137	6.77119	-4.94894	1.62157e-06	2.40839e-05	Significantly downregulated (Adj-P<0.01)
ENSG00000173889.15_PHC3	PHC3	0.460281	4.94538	4.95031	1.61148e-06	2.39565e-05	Significantly upregulated (Adj-P<0.01)
ENSG00000089472.16_HEPH	HEPH	0.954762	-0.528622	4.91003	1.93518e-06	2.75778e-05	Significantly upregulated (Adj-P<0.01)
ENSG00000105647.16_PIK3R2	PIK3R2	0.444776	4.3876	4.94422	1.65682e-06	2.44979e-05	Significantly upregulated (Adj-P<0.01)
ENSG00000175324.9_LSM1	LSM1	-0.307632	3.33668	-4.92814	1.78254e-06	2.58934e-05	Significantly downregulated (Adj-P<0.01)
ENSG00000184254.16_ALDH1A3	ALDH1A3	1.02665	2.05366	4.88694	2.14827e-06	3.03183e-05	Significantly upregulated (Adj-P<0.01)
ENSG00000270659.1_AC079610.2	AC079610.2	-0.844494	-1.00758	-4.91706	1.87444e-06	2.69815e-05	Significantly downregulated (Adj-P<0.01)
ENSG00000210151.2_MT-TS1	MT-TS1	-1.20348	-2.79618	-4.94177	1.67535e-06	2.47438e-05	Significantly downregulated (Adj-P<0.01)
ENSG00000118507.16_AKAP7	AKAP7	-0.478978	3.6829	-4.93157	1.75495e-06	2.56805e-05	Significantly downregulated (Adj-P<0.01)
ENSG00000244491.1_AL021707.5	AL021707.5	-1.88698	-2.37109	-4.92103	1.84097e-06	2.66203e-05	Significantly downregulated (Adj-P<0.01)
ENSG00000267680.5_ZNF224	ZNF224	0.337233	3.12694	4.90985	1.93672e-06	2.75778e-05	Significantly upregulated (Adj-P<0.01)
ENSG00000161970.14_RPL26	RPL26	-0.29614	7.71475	-4.92944	1.77204e-06	2.58117e-05	Significantly downregulated (Adj-P<0.01)
ENSG00000131730.15_CKMT2	CKMT2	-0.636239	8.7944	-4.91901	1.85793e-06	2.67924e-05	Significantly downregulated (Adj-P<0.01)
ENSG00000198663.16_C6orf89	C6orf89	-0.217092	5.79025	-4.94065	1.68395e-06	2.48477e-05	Significantly downregulated (Adj-P<0.01)
ENSG00000171262.11_FAM98B	FAM98B	-0.285799	4.2799	-4.9327	1.74596e-06	2.55961e-05	Significantly downregulated (Adj-P<0.01)
ENSG00000106479.10_ZNF862	ZNF862	0.318025	3.47744	4.91844	1.86281e-06	2.68384e-05	Significantly upregulated (Adj-P<0.01)
ENSG00000102921.7_N4BP1	N4BP1	-0.234591	4.52186	-4.93595	1.72034e-06	2.52906e-05	Significantly downregulated (Adj-P<0.01)
ENSG00000170322.14_NFRKB	NFRKB	0.273159	4.28442	4.92961	1.77067e-06	2.58117e-05	Significantly upregulated (Adj-P<0.01)
ENSG00000125741.4_OPA3	OPA3	-0.31502	4.33617	-4.93283	1.74496e-06	2.55961e-05	Significantly downregulated (Adj-P<0.01)
ENSG00000150753.11_CCT5	CCT5	-0.249608	5.76011	-4.9354	1.72468e-06	2.53309e-05	Significantly downregulated (Adj-P<0.01)
ENSG00000124615.19_MOCS1	MOCS1	-0.317193	4.43326	-4.93187	1.75253e-06	2.56687e-05	Significantly downregulated (Adj-P<0.01)
ENSG00000198315.10_ZKSCAN8	ZKSCAN8	0.465741	4.14412	4.91986	1.8508e-06	2.67138e-05	Significantly upregulated (Adj-P<0.01)
ENSG00000086232.12_EIF2AK1	EIF2AK1	-0.255448	5.22608	-4.92995	1.76794e-06	2.58117e-05	Significantly downregulated (Adj-P<0.01)
ENSG00000129315.10_CCNT1	CCNT1	0.325487	4.31265	4.91642	1.8799e-06	2.7011e-05	Significantly upregulated (Adj-P<0.01)
ENSG00000273599.1_AL731571.1	AL731571.1	0.617352	1.24238	4.85962	2.42977e-06	3.35748e-05	Significantly upregulated (Adj-P<0.01)
ENSG00000185808.13_PIGP	PIGP	-0.264856	3.74113	-4.91063	1.92994e-06	2.75778e-05	Significantly downregulated (Adj-P<0.01)
ENSG00000066044.14_ELAVL1	ELAVL1	-0.167881	4.60631	-4.92116	1.83991e-06	2.66203e-05	Significantly downregulated (Adj-P<0.01)
ENSG00000189077.10_TMEM120A	TMEM120A	-0.663348	4.95619	-4.92072	1.84362e-06	2.66343e-05	Significantly downregulated (Adj-P<0.01)
ENSG00000163513.17_TGFBR2	TGFBR2	0.524583	4.59921	4.916	1.88347e-06	2.70378e-05	Significantly upregulated (Adj-P<0.01)
ENSG00000091039.16_OSBPL8	OSBPL8	0.558233	3.74856	4.89787	2.04467e-06	2.89592e-05	Significantly upregulated (Adj-P<0.01)
ENSG00000087303.17_NID2	NID2	0.790969	2.22092	4.87233	2.2946e-06	3.20698e-05	Significantly upregulated (Adj-P<0.01)
ENSG00000247556.6_OIP5-AS1	OIP5-AS1	-0.340592	8.12874	-4.90591	1.97159e-06	2.80493e-05	Significantly downregulated (Adj-P<0.01)
ENSG00000092020.10_PPP2R3C	PPP2R3C	-0.293453	3.7121	-4.90333	1.99483e-06	2.83544e-05	Significantly downregulated (Adj-P<0.01)
ENSG00000062485.18_CS	CS	-0.326621	8.65168	-4.89678	2.05478e-06	2.90764e-05	Significantly downregulated (Adj-P<0.01)
ENSG00000048544.5_MRPS10	MRPS10	-0.257024	5.64668	-4.91403	1.90039e-06	2.72561e-05	Significantly downregulated (Adj-P<0.01)
ENSG00000221823.10_PPP3R1	PPP3R1	-0.482752	6.00869	-4.91206	1.91746e-06	2.74733e-05	Significantly downregulated (Adj-P<0.01)
ENSG00000159210.9_SNF8	SNF8	-0.353911	4.46614	-4.91164	1.92112e-06	2.7479e-05	Significantly downregulated (Adj-P<0.01)
ENSG00000168137.15_SETD5	SETD5	0.254451	5.3986	4.91188	1.919e-06	2.74733e-05	Significantly upregulated (Adj-P<0.01)
ENSG00000164068.15_RNF123	RNF123	-0.289584	7.49733	-4.90183	2.00843e-06	2.84967e-05	Significantly downregulated (Adj-P<0.01)
ENSG00000096080.11_MRPS18A	MRPS18A	-0.303212	4.70871	-4.91004	1.9351e-06	2.75778e-05	Significantly downregulated (Adj-P<0.01)
ENSG00000198825.13_INPP5F	INPP5F	0.353834	2.58168	4.86536	2.36784e-06	3.28909e-05	Significantly upregulated (Adj-P<0.01)
ENSG00000213699.8_SLC35F6	SLC35F6	-0.326784	2.88981	-4.87569	2.26014e-06	3.16718e-05	Significantly downregulated (Adj-P<0.01)
ENSG00000125970.11_RALY	RALY	-0.281869	6.16334	-4.8959	2.06302e-06	2.91671e-05	Significantly downregulated (Adj-P<0.01)
ENSG00000188343.12_FAM92A	FAM92A	-0.411421	2.69601	-4.86344	2.3884e-06	3.31387e-05	Significantly downregulated (Adj-P<0.01)
ENSG00000268592.3_RAET1E-AS1	RAET1E-AS1	1.07226	-0.214197	4.84451	2.60043e-06	3.55155e-05	Significantly upregulated (Adj-P<0.01)
ENSG00000101938.14_CHRDL1	CHRDL1	1.17165	2.4761	4.85064	2.52986e-06	3.46952e-05	Significantly upregulated (Adj-P<0.01)
ENSG00000267934.1_AC010300.1	AC010300.1	-0.720719	1.07076	-4.82719	2.81045e-06	3.77509e-05	Significantly downregulated (Adj-P<0.01)
ENSG00000108384.14_RAD51C	RAD51C	-0.307339	2.60967	-4.85792	2.44845e-06	3.37742e-05	Significantly downregulated (Adj-P<0.01)
ENSG00000185787.14_MORF4L1	MORF4L1	-0.170097	7.65964	-4.88208	2.19595e-06	3.08541e-05	Significantly downregulated (Adj-P<0.01)
ENSG00000110435.11_PDHX	PDHX	-0.377161	6.42577	-4.8866	2.15154e-06	3.03375e-05	Significantly downregulated (Adj-P<0.01)
ENSG00000137502.9_RAB30	RAB30	0.578916	3.91678	4.87262	2.29163e-06	3.20566e-05	Significantly upregulated (Adj-P<0.01)
ENSG00000109654.14_TRIM2	TRIM2	0.474075	2.31145	4.83628	2.69833e-06	3.65853e-05	Significantly upregulated (Adj-P<0.01)
ENSG00000114423.20_CBLB	CBLB	0.479021	2.87788	4.84834	2.5561e-06	3.49855e-05	Significantly upregulated (Adj-P<0.01)
ENSG00000249669.9_CARMN	CARMN	-0.74378	3.8754	-4.88134	2.20328e-06	3.09297e-05	Significantly downregulated (Adj-P<0.01)
ENSG00000168143.8_FAM83B	FAM83B	1.83194	-0.209002	4.94417	1.65716e-06	2.44979e-05	Significantly upregulated (Adj-P<0.01)
ENSG00000069535.13_MAOB	MAOB	-0.354538	6.50498	-4.88344	2.1825e-06	3.07195e-05	Significantly downregulated (Adj-P<0.01)
ENSG00000092607.14_TBX15	TBX15	-0.321465	6.71622	-4.88072	2.2094e-06	3.09882e-05	Significantly downregulated (Adj-P<0.01)
ENSG00000141627.13_DYM	DYM	-0.263163	5.815	-4.88449	2.17212e-06	3.06004e-05	Significantly downregulated (Adj-P<0.01)
ENSG00000169372.12_CRADD	CRADD	-0.349535	3.15427	-4.86185	2.40549e-06	3.33264e-05	Significantly downregulated (Adj-P<0.01)
ENSG00000147684.8_NDUFB9	NDUFB9	-0.411755	7.61912	-4.87039	2.31477e-06	3.22949e-05	Significantly downregulated (Adj-P<0.01)
ENSG00000119535.17_CSF3R	CSF3R	-1.67493	0.0213569	-4.81249	3.00137e-06	3.98816e-05	Significantly downregulated (Adj-P<0.01)
ENSG00000103148.15_NPRL3	NPRL3	-0.262432	4.29218	-4.87518	2.26528e-06	3.1716e-05	Significantly downregulated (Adj-P<0.01)
ENSG00000198964.13_SGMS1	SGMS1	0.425592	3.43823	4.85334	2.49939e-06	3.43574e-05	Significantly upregulated (Adj-P<0.01)
ENSG00000186377.7_CYP4X1	CYP4X1	0.699762	1.48996	4.81102	3.02118e-06	4.01064e-05	Significantly upregulated (Adj-P<0.01)
ENSG00000109618.11_SEPSECS	SEPSECS	0.403967	2.9964	4.84105	2.64119e-06	3.5995e-05	Significantly upregulated (Adj-P<0.01)
ENSG00000122417.15_ODF2L	ODF2L	0.545037	1.96912	4.81784	2.93048e-06	3.90985e-05	Significantly upregulated (Adj-P<0.01)
ENSG00000124942.13_AHNAK	AHNAK	0.435273	9.9839	4.85058	2.53052e-06	3.46952e-05	Significantly upregulated (Adj-P<0.01)
ENSG00000169629.11_RGPD8	RGPD8	1.46792	1.46224	4.80516	3.10124e-06	4.1032e-05	Significantly upregulated (Adj-P<0.01)
ENSG00000136273.12_HUS1	HUS1	-0.264917	3.40672	-4.85563	2.47376e-06	3.40346e-05	Significantly downregulated (Adj-P<0.01)
ENSG00000162745.10_OLFML2B	OLFML2B	0.780913	2.42971	4.83883	2.66756e-06	3.6261e-05	Significantly upregulated (Adj-P<0.01)
ENSG00000161267.11_BDH1	BDH1	-0.93804	3.995	-4.86659	2.35476e-06	3.27952e-05	Significantly downregulated (Adj-P<0.01)
ENSG00000279551.1_AC025263.3	AC025263.3	1.15143	-0.710546	4.86046	2.42062e-06	3.34776e-05	Significantly upregulated (Adj-P<0.01)
ENSG00000037280.15_FLT4	FLT4	-0.534789	2.66053	-4.84442	2.60153e-06	3.55155e-05	Significantly downregulated (Adj-P<0.01)
ENSG00000223768.2_LINC00205	LINC00205	0.565591	1.35639	4.8055	3.09656e-06	4.10043e-05	Significantly upregulated (Adj-P<0.01)
ENSG00000121769.7_FABP3	FABP3	-0.781334	7.84544	-4.8572	2.45639e-06	3.38543e-05	Significantly downregulated (Adj-P<0.01)
ENSG00000226306.6_NPY6R	NPY6R	-0.842665	3.66827	-4.85796	2.44802e-06	3.37742e-05	Significantly downregulated (Adj-P<0.01)
ENSG00000285589.1_AC010422.8	AC010422.8	0.44647	1.81728	4.81246	3.00173e-06	3.98816e-05	Significantly upregulated (Adj-P<0.01)
ENSG00000139697.13_SBNO1	SBNO1	0.307871	5.05715	4.86557	2.36556e-06	3.28879e-05	Significantly upregulated (Adj-P<0.01)
ENSG00000227372.12_TP73-AS1	TP73-AS1	0.230906	4.89248	4.86705	2.3499e-06	3.27563e-05	Significantly upregulated (Adj-P<0.01)
ENSG00000129003.17_VPS13C	VPS13C	0.391977	5.77325	4.86628	2.35805e-06	3.28122e-05	Significantly upregulated (Adj-P<0.01)
ENSG00000048162.20_NOP16	NOP16	-0.393986	3.48443	-4.85129	2.52247e-06	3.46447e-05	Significantly downregulated (Adj-P<0.01)
ENSG00000113845.9_TIMMDC1	TIMMDC1	-0.275563	6.03651	-4.8633	2.38986e-06	3.31387e-05	Significantly downregulated (Adj-P<0.01)
ENSG00000172215.5_CXCR6	CXCR6	1.3311	2.70463	4.82064	2.89399e-06	3.86766e-05	Significantly upregulated (Adj-P<0.01)
ENSG00000269713.7_NBPF9	NBPF9	0.365423	2.51105	4.82015	2.90039e-06	3.87297e-05	Significantly upregulated (Adj-P<0.01)
ENSG00000127831.10_VIL1	VIL1	-3.10018	-2.17006	-4.87063	2.3123e-06	3.22889e-05	Significantly downregulated (Adj-P<0.01)
ENSG00000144867.11_SRPRB	SRPRB	-0.307425	3.30941	-4.83984	2.65548e-06	3.61587e-05	Significantly downregulated (Adj-P<0.01)
ENSG00000214870.8_AC004540.1	AC004540.1	1.13472	-1.77562	4.94027	1.68689e-06	2.48679e-05	Significantly upregulated (Adj-P<0.01)
ENSG00000096384.19_HSP90AB1	HSP90AB1	-0.2781	9.53235	-4.83711	2.68819e-06	3.64789e-05	Significantly downregulated (Adj-P<0.01)
ENSG00000143569.18_UBAP2L	UBAP2L	-0.208329	5.60308	-4.86067	2.41832e-06	3.34749e-05	Significantly downregulated (Adj-P<0.01)
ENSG00000094916.15_CBX5	CBX5	0.340952	4.86634	4.85626	2.46675e-06	3.39675e-05	Significantly upregulated (Adj-P<0.01)
ENSG00000119778.14_ATAD2B	ATAD2B	0.427386	2.5326	4.80702	3.07554e-06	4.07939e-05	Significantly upregulated (Adj-P<0.01)
ENSG00000165392.9_WRN	WRN	0.463822	1.8267	4.79069	3.30782e-06	4.34394e-05	Significantly upregulated (Adj-P<0.01)
ENSG00000162627.16_SNX7	SNX7	1.13932	0.968293	4.78141	3.44727e-06	4.50843e-05	Significantly upregulated (Adj-P<0.01)
ENSG00000127603.25_MACF1	MACF1	0.372292	6.83408	4.84946	2.54333e-06	3.48408e-05	Significantly upregulated (Adj-P<0.01)
ENSG00000168779.19_SHOX2	SHOX2	0.714145	0.420641	4.78325	3.41919e-06	4.48278e-05	Significantly upregulated (Adj-P<0.01)
ENSG00000160961.11_ZNF333	ZNF333	0.295525	3.58953	4.83099	2.76303e-06	3.73033e-05	Significantly upregulated (Adj-P<0.01)
ENSG00000138767.13_CNOT6L	CNOT6L	0.435961	3.83852	4.83244	2.74514e-06	3.70933e-05	Significantly upregulated (Adj-P<0.01)
ENSG00000155099.7_PIP4P2	PIP4P2	-0.520707	2.74433	-4.81507	2.967e-06	3.95193e-05	Significantly downregulated (Adj-P<0.01)
ENSG00000196072.11_BLOC1S2	BLOC1S2	-0.373772	3.76589	-4.83892	2.66651e-06	3.6261e-05	Significantly downregulated (Adj-P<0.01)
ENSG00000164010.14_ERMAP	ERMAP	0.480294	1.63876	4.78297	3.42351e-06	4.48475e-05	Significantly upregulated (Adj-P<0.01)
ENSG00000189144.13_ZNF573	ZNF573	0.672634	0.854363	4.77497	3.54748e-06	4.60583e-05	Significantly upregulated (Adj-P<0.01)
ENSG00000117122.13_MFAP2	MFAP2	1.30413	-1.10812	4.82745	2.80711e-06	3.77509e-05	Significantly upregulated (Adj-P<0.01)
ENSG00000130244.12_FAM98C	FAM98C	0.540908	1.14124	4.77801	3.4998e-06	4.5621e-05	Significantly upregulated (Adj-P<0.01)
ENSG00000100591.7_AHSA1	AHSA1	-0.25844	5.77554	-4.84512	2.59333e-06	3.54645e-05	Significantly downregulated (Adj-P<0.01)
ENSG00000177370.4_TIMM22	TIMM22	-0.283638	3.39716	-4.82517	2.83598e-06	3.79973e-05	Significantly downregulated (Adj-P<0.01)
ENSG00000133065.10_SLC41A1	SLC41A1	-0.575318	6.47859	-4.84122	2.63911e-06	3.5995e-05	Significantly downregulated (Adj-P<0.01)
ENSG00000125149.11_C16orf70	C16orf70	-0.209588	3.64803	-4.8294	2.78272e-06	3.75372e-05	Significantly downregulated (Adj-P<0.01)
ENSG00000266923.1_AC063949.2	AC063949.2	1.69819	-1.51259	4.94725	1.6341e-06	2.42473e-05	Significantly upregulated (Adj-P<0.01)
ENSG00000196730.12_DAPK1	DAPK1	0.684651	1.69103	4.77894	3.48535e-06	4.55073e-05	Significantly upregulated (Adj-P<0.01)
ENSG00000225342.2_AC079630.1	AC079630.1	0.943892	-0.706118	4.82901	2.78762e-06	3.75713e-05	Significantly upregulated (Adj-P<0.01)
ENSG00000135749.18_PCNX2	PCNX2	0.86255	-0.167641	4.78512	3.39083e-06	4.44927e-05	Significantly upregulated (Adj-P<0.01)
ENSG00000088682.13_COQ9	COQ9	-0.327714	6.97382	-4.83299	2.73833e-06	3.70327e-05	Significantly downregulated (Adj-P<0.01)
ENSG00000166887.15_VPS39	VPS39	-0.183538	5.78547	-4.83714	2.68788e-06	3.64789e-05	Significantly downregulated (Adj-P<0.01)
ENSG00000103423.13_DNAJA3	DNAJA3	-0.240631	6.35551	-4.83315	2.73642e-06	3.70327e-05	Significantly downregulated (Adj-P<0.01)
ENSG00000284931.1_AC104389.5	AC104389.5	-2.98873	-2.91987	-4.96389	1.51468e-06	2.27949e-05	Significantly downregulated (Adj-P<0.01)
ENSG00000138138.13_ATAD1	ATAD1	-0.355237	5.41416	-4.83361	2.73075e-06	3.69933e-05	Significantly downregulated (Adj-P<0.01)
ENSG00000065361.15_ERBB3	ERBB3	2.32355	1.34916	4.76383	3.72722e-06	4.79167e-05	Significantly upregulated (Adj-P<0.01)
ENSG00000147180.16_ZNF711	ZNF711	1.16666	1.4423	4.7585	3.81639e-06	4.88259e-05	Significantly upregulated (Adj-P<0.01)
ENSG00000159399.9_HK2	HK2	-1.60615	4.90029	-4.82881	2.79006e-06	3.75724e-05	Significantly downregulated (Adj-P<0.01)
ENSG00000112394.16_SLC16A10	SLC16A10	0.568065	5.13763	4.82731	2.80888e-06	3.77509e-05	Significantly upregulated (Adj-P<0.01)
ENSG00000188647.12_PTAR1	PTAR1	0.457014	4.77818	4.8245	2.84452e-06	3.80796e-05	Significantly upregulated (Adj-P<0.01)
ENSG00000100906.10_NFKBIA	NFKBIA	0.644433	5.25145	4.82524	2.83504e-06	3.79973e-05	Significantly upregulated (Adj-P<0.01)
ENSG00000205726.14_ITSN1	ITSN1	-0.351736	5.24202	-4.82536	2.8335e-06	3.79973e-05	Significantly downregulated (Adj-P<0.01)
ENSG00000178814.16_OPLAH	OPLAH	-0.461861	5.54832	-4.82348	2.85752e-06	3.82215e-05	Significantly downregulated (Adj-P<0.01)
ENSG00000137441.7_FGFBP2	FGFBP2	2.16427	-2.02198	4.98328	1.38614e-06	2.13047e-05	Significantly upregulated (Adj-P<0.01)
ENSG00000272886.5_DCP1A	DCP1A	0.284059	3.84865	4.80023	3.17012e-06	4.18388e-05	Significantly upregulated (Adj-P<0.01)
ENSG00000285103.2_AL451123.1	AL451123.1	0.93672	-0.819947	4.80346	3.1248e-06	4.13092e-05	Significantly upregulated (Adj-P<0.01)
ENSG00000145949.10_MYLK4	MYLK4	-1.3169	4.08381	-4.81648	2.94834e-06	3.93038e-05	Significantly downregulated (Adj-P<0.01)
ENSG00000167992.12_VWCE	VWCE	0.778434	-0.208657	4.75472	3.88084e-06	4.95705e-05	Significantly upregulated (Adj-P<0.01)
ENSG00000197646.7_PDCD1LG2	PDCD1LG2	1.03955	-0.123656	4.76479	3.71137e-06	4.77515e-05	Significantly upregulated (Adj-P<0.01)
ENSG00000131747.14_TOP2A	TOP2A	1.91574	-2.23072	4.8832	2.18486e-06	3.07254e-05	Significantly upregulated (Adj-P<0.01)
ENSG00000188229.5_TUBB4B	TUBB4B	-0.488115	5.62825	-4.81386	2.98306e-06	3.97e-05	Significantly downregulated (Adj-P<0.01)
ENSG00000260618.1_AC025917.1	AC025917.1	1.14308	-0.428937	4.792	3.28861e-06	4.32946e-05	Significantly upregulated (Adj-P<0.01)
ENSG00000176853.15_FAM91A1	FAM91A1	0.411503	2.87886	4.77035	3.62097e-06	4.67399e-05	Significantly upregulated (Adj-P<0.01)
ENSG00000197122.11_SRC	SRC	0.827537	0.391605	4.73622	4.21166e-06	5.28896e-05	Significantly upregulated (Adj-P<0.01)
ENSG00000161551.14_ZNF577	ZNF577	0.45359	2.94361	4.77037	3.62066e-06	4.67399e-05	Significantly upregulated (Adj-P<0.01)
ENSG00000070759.16_TESK2	TESK2	0.46986	2.93662	4.77248	3.58679e-06	4.64499e-05	Significantly upregulated (Adj-P<0.01)
ENSG00000163714.17_U2SURP	U2SURP	0.36996	5.73429	4.80679	3.07881e-06	4.08033e-05	Significantly upregulated (Adj-P<0.01)
ENSG00000115594.11_IL1R1	IL1R1	0.443971	3.27148	4.77457	3.55366e-06	4.60583e-05	Significantly upregulated (Adj-P<0.01)
ENSG00000196922.10_ZNF252P	ZNF252P	-0.384462	4.78177	-4.80277	3.1345e-06	4.14031e-05	Significantly downregulated (Adj-P<0.01)
ENSG00000146247.13_PHIP	PHIP	0.467274	4.91388	4.79165	3.29372e-06	4.33053e-05	Significantly upregulated (Adj-P<0.01)
ENSG00000166311.9_SMPD1	SMPD1	-0.303476	4.49464	-4.79756	3.20819e-06	4.2306e-05	Significantly downregulated (Adj-P<0.01)
ENSG00000197006.13_METTL9	METTL9	-0.202471	5.86062	-4.79323	3.2706e-06	4.30933e-05	Significantly downregulated (Adj-P<0.01)
ENSG00000187605.15_TET3	TET3	0.446806	1.82221	4.73404	4.25246e-06	5.33304e-05	Significantly upregulated (Adj-P<0.01)
ENSG00000172728.15_FUT10	FUT10	0.591111	-0.056818	4.73012	4.32661e-06	5.40894e-05	Significantly upregulated (Adj-P<0.01)
ENSG00000206422.2_LRRC30	LRRC30	0.66107	1.72146	4.72771	4.37283e-06	5.44529e-05	Significantly upregulated (Adj-P<0.01)
ENSG00000041357.15_PSMA4	PSMA4	-0.208111	5.97681	-4.79157	3.29488e-06	4.33053e-05	Significantly downregulated (Adj-P<0.01)
ENSG00000185495.10_AC138393.1	AC138393.1	-0.355517	2.95703	-4.76133	3.76876e-06	4.83546e-05	Significantly downregulated (Adj-P<0.01)
ENSG00000138759.18_FRAS1	FRAS1	0.620472	3.8737	4.77569	3.53603e-06	4.598e-05	Significantly upregulated (Adj-P<0.01)
ENSG00000174928.15_C3orf33	C3orf33	-0.362308	1.8987	-4.73138	4.30261e-06	5.39167e-05	Significantly downregulated (Adj-P<0.01)
ENSG00000184451.5_CCR10	CCR10	0.53126	1.43582	4.72608	4.40445e-06	5.48036e-05	Significantly upregulated (Adj-P<0.01)
ENSG00000146021.14_KLHL3	KLHL3	0.526633	2.18158	4.72968	4.33504e-06	5.41522e-05	Significantly upregulated (Adj-P<0.01)
ENSG00000087116.15_ADAMTS2	ADAMTS2	1.15929	0.996925	4.7162	4.60041e-06	5.67968e-05	Significantly upregulated (Adj-P<0.01)
ENSG00000107201.9_DDX58	DDX58	0.5009	3.04016	4.75104	3.94445e-06	5.02214e-05	Significantly upregulated (Adj-P<0.01)
ENSG00000274286.1_ADRA2B	ADRA2B	-0.524807	1.93019	-4.7361	4.21398e-06	5.28896e-05	Significantly downregulated (Adj-P<0.01)
ENSG00000112039.4_FANCE	FANCE	0.642378	3.21043	4.75083	3.94813e-06	5.0228e-05	Significantly upregulated (Adj-P<0.01)
ENSG00000125089.16_SH3TC1	SH3TC1	0.731668	1.3656	4.72117	4.50077e-06	5.57836e-05	Significantly upregulated (Adj-P<0.01)
ENSG00000109466.13_KLHL2	KLHL2	0.674232	1.33421	4.7107	4.71309e-06	5.79627e-05	Significantly upregulated (Adj-P<0.01)
ENSG00000163930.9_BAP1	BAP1	-0.212082	5.84223	-4.78273	3.42716e-06	4.48582e-05	Significantly downregulated (Adj-P<0.01)
[truncated: 2,752 more rows]

## Sheet: metPRTvsY_sig
List of Differentially Expressed Genes between young and plaPRT at week 16
[truncated: 3,544 more rows]
