# Supplementary material for: Metformin alters skeletal muscle transcriptome adaptations to resistance training in older adults
Source: Aging (Albany NY). 2020 Oct 18;12(20):19852–66. doi: 10.18632/aging.104096 (PMC7655218; doi:10.18632/aging.104096)
Supplement: Supplementary Table 6 [file aging-12-104096-s005..xlsx]

## Sheet: Common Genes
Supplemental Table 6. ConsensusPathdb pathway overrrepresentation for genes no longer different between young and old baseline following 16 weeks common to both plaPRT and metPRT
Pathways	p-value	q-value	Source	ID
Spliceosome - Homo sapiens (human)	3.0083e-06	0.00081525	KEGG	SNRPA1; DHX15; TXNL4A; PRPF3; SRSF5; SNRNP200; SRSF7; SRSF6; SRSF1; SRSF2; HNRNPU; PRPF40A; HNRNPM; HNRNPC; CDC5L; HNRNPA1; HNRNPA3; ACIN1; DDX39B; THOC1; CRNKL1; DDX23; SLU7; RBMX; DDX5
mRNA Splicing	7.28797e-06	0.00152457	Reactome	FUS; DHX15; HNRNPU; HNRNPH1; PPWD1; TXNL4A; PRPF3; NUDT21; SRSF5; SNRNP200; SRSF7; SRSF6; SRSF1; SRSF2; SNRPA1; PRPF40A; HNRNPL; HNRNPM; HNRNPC; DHX9; CDC5L; HNRNPA3; HNRNPA1; POLR2C; CRNKL1; DDX23; SRRT; SNRNP48; RBMX; DDX5
Glycolysis	1.30441e-05	0.00201997	Reactome	PKM; PFKFB2; NUP62; GPI; NUP133; NUP98; NUP58; NUP153; ENO1; NUP107; ENO3; PGAM2; ALDOA; RANBP2; PFKL; PGK1
Metabolism of RNA	2.38899e-05	0.00302497	Reactome	TRMT112; FUS; NUP133; RPS8; DHX15; SMG8; MAPK14; AKT1; HNRNPH1; PPWD1; TXNL4A; NUDT21; PRPF3; NXF1; XPO1; SNRNP200; SRSF7; SRSF6; SRSF1; SRSF2; POLDIP3; NUP107; SNRPA1; PRPF40A; KIAA0391; TRMT5; HNRNPL; HNRNPM; CNOT3; CNOT1; HNRNPC; METTL14; RANBP2; DHX9; CDC5L; OSGEP; HNRNPU; NUP98; HNRNPA3; HNRNPA1; GTF2H5; CASC3; SRSF5; RPL11; POLR2C; NUP62; DDX39B; THOC1; CRNKL1; TYW5; DDX23; RPS7; ZC3H11A; S…
eNOS activation	3.2423e-05	0.00351465	Reactome	NOS3; CALM1; AKT1; CYGB; ZDHHC21; DDAH1
Glucose metabolism	9.57682e-05	0.00943752	Reactome	PKM; NUP58; NUP62; GPI; NUP133; NUP107; PFKFB2; NUP153; ENO1; ENO3; PGAM2; FBP2; ALDOA; NUP98; RANBP2; PFKL; PGK1
Endocytosis - Homo sapiens (human)	0.000234862	0.0212158	KEGG	SNX1; EHD3; EHD2; ITCH; EGFR; ARFGAP1; CHMP3; IQSEC3; IQSEC2; CAV3; VPS45; ARAP3; SPG21; EEA1; GRK5; RAB11A; CXCR2; RAB10; IGF1R; TRAF6; ARPC3; SH3GLB1; AGAP1; WASHC2A; CYTH1; CLTCL1; VPS35; PLD2; RBSN; PIP5K1C; GIT1; WIPF2
RNA Polymerase II Transcription	0.000366934	0.0264333	Reactome	SMARCC2; PLK2; AKT1; TNRC6C; ZNF419; NUDT21; ZNF143; DDX39B; ZNF382; ZNF701; COX20; MYC; ZNF268; ZNF688; NELFA; GPI; THOC1; GATA2; BRD2; PCGF2; ZC3H11A; ZNF441; ZNF671; CCND3; RBBP5; ZNF274; CNOT4; ZNF561; ZNF197; ZNF211; CDKN1B; RAD1; SRSF5; CHD3; SRSF6; SRSF1; CHD4; MAML1; CCNE1; H3F3B; CLDN5; CHEK1; ZNF226; PRKAB1; ARID2; POLR2C; ZNF589; ZNF611; TAF5; TAF4; ZNF615; ZNF614; SRRT; TAF9; KDM5B; C…
Signaling by NOTCH	0.000382035	0.0264333	Reactome	NEURL1B; APH1B; HEY1; MFNG; AGO2; ITCH; MAML1; NOTCH4; EGFR; E2F3; NCSTN; TNRC6C; HDAC5; PLXND1; B4GALT1; DLL4; MYC; LFNG; POFUT1
Metabolism of nitric oxide	0.000418827	0.0264333	Reactome	NOS3; CALM1; AKT1; CYGB; ZDHHC21; DDAH1
mRNA 3,-end processing	0.000419606	0.0264333	Reactome	SRSF5; SRSF7; SRSF6; DDX39B; SRSF2; POLDIP3; SLU7; CASC3; ZC3H11A; SRSF1; THOC1; NUDT21
Other types of O-glycan biosynthesis - Homo sapiens (human)	0.000438929	0.0264333	KEGG	COLGALT2; POMT2; MFNG; B4GALT1; POMT1; LFNG; POFUT1
SUMOylation of RNA binding proteins	0.000832076	0.0409986	Reactome	PCGF2; NUP62; NUP133; NUP98; NUP58; NUP153; NUP107; HNRNPC; CBX2; RANBP2
Transcriptional Regulation by TP53	0.00127465	0.0538193	Reactome	CDKN1B; MSH2; NELFA; PRKAA2; MAPK14; AKT1; TNRC6C; RAD1; NLRC4; CHD3; EHMT2; BTG2; BID; CCNE1; COX20; CNOT4; CNOT3; CNOT1; MTA2; CHEK1; PLK2; BNIP3L; GPI; RBL2; RRAGB; PRKAB1; GTF2H5; POLR2C; CHD4; TAF5; TAF4; NELFCD; MEAF6; RPA1; TAF9; RABGGTB; CDK5; COX11; AGO2; LAMTOR2; ATF2
Arginine biosynthesis - Homo sapiens (human)	0.00211941	0.0696194	KEGG	NOS1; NOS2; NOS3; ARG2; GLUD1; ACY1
Longevity regulating pathway - multiple species - Homo sapiens (human)	0.00268831	0.0827028	KEGG	ADCY4; IGF1R; PRKAB1; ADCY3; SIRT1; IRS2; PRKAA2; FOXO3; AKT1; EIF4EBP2; CLPB
Metabolism of carbohydrates	0.00340638	0.092313	Reactome	NUP58; NUP133; SDC3; MAN2B1; HSPG2; IDS; ALDOA; PGAM2; FBP2; NUP62; CALM1; NUP98; PFKL; B4GALT1; PKM; RANBP2; GPI; NUP107; CRYL1; PHKA1; ENO1; ENO3; CHST1; PPP1R3C; PFKFB2; NUP153; SLC35B2; HS6ST3; ABCC5; PGK1
Glucagon signaling pathway - Homo sapiens (human)	0.00381771	0.100936	KEGG	SIRT1; CALM1; PRKAA2; PRKAB1; PHKA1; CALML6; PDE3B; AKT1; PFKL; PGAM2; CREB3L4; PDHB; ATF2; PPP4R3B; PKM
Transport of Mature mRNA Derived from an Intronless Transcript	0.00469886	0.11867	Reactome	NUP62; NXF1; NUP133; NUP98; NUP58; NUP153; NUP107; RANBP2
Signaling by Receptor Tyrosine Kinases	0.00477564	0.11867	Reactome	PDGFRB; COL4A2; POLR2C; ITCH; MKNK1; EGFR; FRS3; NCSTN; MAPK14; AKT1; NTF3; HNRNPH1; ADCYAP1R1; LAMA5; PGF; APH1B; CRKL; CALM1; PDE3B; PIK3R4; HNRNPM; CUL5; NRG2; CDH5; CHEK1; IGF1R; NOS3; DIAPH1; HNRNPA1; RPS6KA2; SHB; HPN; COL4A1; PIK3C3; CTNNA1; FGF2; RBFOX2; ABI2; FLRT3; IRS2; CDK5; RALB; SH2B3
Generic Transcription Pathway	0.00501531	0.11867	Reactome	SMARCC2; NELFA; AKT1; TNRC6C; ZNF382; ZNF701; COX20; MYC; ZNF268; ZNF688; PLK2; ZNF550; GATA2; BRD2; PCGF2; ZNF441; ZNF671; CCND3; RBBP5; ZNF274; KDM5B; ZNF197; ZNF211; CDKN1B; RAD1; CHD3; CHD4; MAML1; CCNE1; H3F3B; CLDN5; CHEK1; ZNF226; PRKAB1; ARID2; POLR2C; ZNF589; ZNF611; TAF5; TAF4; ZNF615; ZNF614; TAF9; ZNF561; COX11; ZNF112; LAMTOR2; AGO2; ZNF234; MAPK14; CBX2; EHMT2; ZNF530; BTG2; ZNF571;…
Apelin signaling pathway - Homo sapiens (human)	0.00502999	0.11867	KEGG	ADCY4; NOS1; NOS2; NOS3; APLNR; ADCY3; PIK3R6; PRKAA2; CALM1; CALML6; PDE3B; AKT1; PIK3R4; PLIN1; HDAC5; PIK3C3; PRKAB1; NRF1
PTEN Regulation	0.00503581	0.11867	Reactome	TNKS; CHD3; HDAC5; CHD4; RRAGB; FRK; REST; AKT1; TNRC6C; MTA2; AGO2; CBX2; LAMTOR2; ATF2
Nitric oxide stimulates guanylate cyclase	0.00548472	0.124198	Reactome	NOS1; NOS2; NOS3; KCNMB4; KCNMA1; PDE3B
Transport of Mature mRNAs Derived from Intronless Transcripts	0.00549954	0.124198	Reactome	NUP62; NXF1; NUP133; NUP98; NUP58; NUP153; NUP107; RANBP2
Protein methylation	0.00571837	0.126504	Reactome	METTL22; ETFBKMT; KIN; METTL21A; CALM1
Signaling by Rho GTPases	0.00636603	0.130685	Reactome	NUP133; CDKN1B; LIMK1; NOXA1; ARHGAP1; ARHGEF15; DIAPH1; XPO1; CENPT; ARAP3; KTN1; CALM1; NUP98; GOPC; PKN1; PIK3R4; ARHGDIB; H3F3B; ARHGAP27; RANBP2; CENPO; ARHGEF37; CLASP2; BUB3; NUP107; ARPC3; DAAM1; PKN3; PKN2; ABR; ARHGAP39; RHOBTB2; NDEL1; PIK3C3; CTNNA1; PLEKHG2; TAX1BP3; MYL12B; PLEKHG5; ABI2; PREX1; ARHGAP10; WIPF2
Signaling by NOTCH4	0.0066393	0.130685	Reactome	NOTCH4; APH1B; DLL4; NCSTN
Gluconeogenesis	0.00680253	0.130685	Reactome	GPI; ENO1; ENO3; PGAM2; FBP2; ALDOA; PGK1
Nuclear import of Rev protein	0.00680253	0.130685	Reactome	NUP62; NUP133; NUP107; NUP58; NUP153; NUP98; RANBP2
Effects of PIP2 hydrolysis	0.00816761	0.147038	Reactome	DAGLA; PRKCH; DAGLB; RASGRP2; MGLL; DGKD
Influenza Viral RNA Transcription and Replication	0.00853124	0.147038	Reactome	NUP62; NUP133; NUP107; NUP58; NUP153; POLR2C; NUP98; RANBP2
Signaling by NOTCH3	0.00853124	0.147038	Reactome	NEURL1B; APH1B; MAML1; EGFR; NCSTN; DLL4; PLXND1; HEY1
Regulation of lipolysis in adipocytes - Homo sapiens (human)	0.0096564	0.161039	KEGG	ADCY4; AQP7; ADCY3; MGLL; IRS2; PDE3B; AKT1; ADRB2; PLIN1
Chromatin modifying enzymes	0.00997323	0.161358	Reactome	SMARCC2; MSL3; RBBP5; KANSL2; CHD3; EHMT2; CHD4; HCFC1; ATF2; TADA2A; COPRS; NFKB2; MTA2; SUPT20H; SUV39H1; ARID2; REST; SMYD3; HAT1; MEAF6; TAF9; EPC1; ACTL6A; KAT6B; KDM3A; PHF2; ELP2; KDM5B; VPS72
Chromatin organization	0.00997323	0.161358	Reactome	SMARCC2; MSL3; RBBP5; KANSL2; CHD3; EHMT2; CHD4; HCFC1; ATF2; TADA2A; COPRS; NFKB2; MTA2; SUPT20H; SUV39H1; ARID2; REST; SMYD3; HAT1; MEAF6; TAF9; EPC1; ACTL6A; KAT6B; KDM3A; PHF2; ELP2; KDM5B; VPS72
